# Supplementary material for: Comprehensive Proteomics Analysis of Laticifer Latex Reveals New Insights into Ethylene Stimulation of Natural Rubber Production
Source: PubMed Central journal article supplement (PMC4562231; doi:10.1038/srep13778), 2015-09-08
Supplement: srep13778-s1.pdf [file srep13778-s1.pdf]

## **Supplemental Information**

**Title:** Comprehensive Proteomics Analysis of Laticifer Latex Reveals New Insights into Ethylene Stimulation of Natural Rubber Production

**Authors:**

**Xuchu Wang (Corresponding author)**

Key Laboratory of Biology and Genetic Resources for Tropical Crops, Institute of Tropical Biosciences and Biotechnology, Chinese Academy of Tropical Agricultural Sciences, Haikou Hainan 571101, China

E-mail: [xchwanghainan@163.com](mailto:xchwanghainan@163.com)

**Dan Wang**

Key Laboratory of Biology and Genetic Resources for Tropical Crops, Institute of Tropical Biosciences and Biotechnology, Chinese Academy of Tropical Agricultural Sciences, Haikou Hainan 571101, China

**Yong Sun**

Key Laboratory of Biology and Genetic Resources for Tropical Crops, Institute of Tropical Biosciences and Biotechnology, Chinese Academy of Tropical Agricultural Sciences, Haikou Hainan 571101, China

**Qian Yang**

Key Laboratory of Biology and Genetic Resources for Tropical Crops, Institute of Tropical Biosciences and Biotechnology, Chinese Academy of Tropical Agricultural Sciences, Haikou Hainan 571101, China

**Lili Chang**

Key Laboratory of Biology and Genetic Resources for Tropical Crops, Institute of

Tropical Biosciences and Biotechnology, Chinese Academy of Tropical Agricultural Sciences, Haikou Hainan 571101, China

**Limin Wang**

Key Laboratory of Biology and Genetic Resources for Tropical Crops, Institute of Tropical Biosciences and Biotechnology, Chinese Academy of Tropical Agricultural Sciences, Haikou Hainan 571101, China

**Xueru Meng**

Key Laboratory of Biology and Genetic Resources for Tropical Crops, Institute of Tropical Biosciences and Biotechnology, Chinese Academy of Tropical Agricultural Sciences, Haikou Hainan 571101, China

**Qixing Huang**

Key Laboratory of Biology and Genetic Resources for Tropical Crops, Institute of Tropical Biosciences and Biotechnology, Chinese Academy of Tropical Agricultural Sciences, Haikou Hainan 571101, China

**Xiang Jin**

Key Laboratory of Biology and Genetic Resources for Tropical Crops, Institute of Tropical Biosciences and Biotechnology, Chinese Academy of Tropical Agricultural Sciences, Haikou Hainan 571101, China

**Zheng Tong**

Key Laboratory of Biology and Genetic Resources for Tropical Crops, Institute of Tropical Biosciences and Biotechnology, Chinese Academy of Tropical Agricultural Sciences, Haikou Hainan 571101, China

## **Supplementary Figures and Tables**

**Supplementary Figure S1:** Identification of the high abundant latex proteins in 2-DE gels.

**Supplementary Figure S2:** Classification and functional analysis of the identified main latex proteins.

**Supplementary Figure S3:** Identification of the differentially expressed latex proteins in DIGE gels.

**Supplementary Figure S4:** Identification of ethylene responsive latex proteins by iTRAQ.

**Supplementary Figure S5:** Information of the 59 phosphorlated latex proteins.

**Supplementary Figure S6:** Antibody information.

**Supplementary Figure S7:** Primers used in RT-PCR.

**Supplementary Table S1:** MS identification of high abundant rubber latex proteins 2-DE gels.

**Supplementary Table S2:** MS identification of the differential latex proteins in DIGE gels.

**Supplementary Table S3:** MS information of ethylene responsive latex proteins by iTRAQ.

**Supplementary Table S4:** MS identification of the phosphorlated latex proteins.

## Supplementary Figure S1:

Annotated spectra for the **252** total latex protein spots and **35** bands identified by PMF and the combination results of PMF and PFF.

Spot numbers of the **252** proteins correspond to the proteins that listed in detail.

**CID:** collision induced desorption;

**MALDI TOF:**

matrix assisted laser desorption/ionization time of flight;

**MS:** mass spectrometry;

**PMF:** peptide mass fingerprinting;

**PFF:** peptide fragment fingerprinting.



Spot No.: 1

NCBI accession No.: [gi|132270](#) Species: *Hevea brasiliensis*

Protein name: Rubber elongation factor protein; Short=REF;

AltName: Allergen=Hev b 1

Mascot score: **122**

Sequence coverage %: **73**

Matched peptides No.: 9

Total peptides No.: **23**

Calculated Mr: **14713**

Calculated pI: **5.04**

Probability Based Mowse Score:

Protein score is  $-10 \cdot \log(P)$ , where P is the probability that the observed match is a random event. Protein scores greater than 73 are significant ( $p < 0.05$ ).

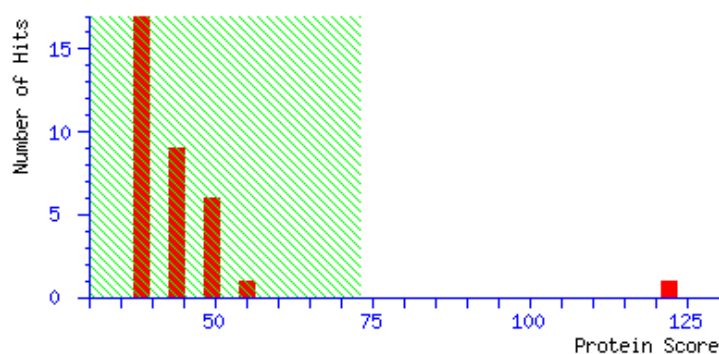

Matched peptide sequences: shown in **Bold Red**

1 MAEDEDNQQG QGEGLYLGF **VQDAATYAVT** TFSNVYLEAK DKSGPLQPGV  
51 **DIIEGPVKNV** AVPLYNRFYSY IPNGALKFVD STVVASVTII DRSLPPIVKD  
101 **ASIQVVS AIR** AAPEAARSLA **SSLPGQTKIL** AKVIFYGEN

Spot No.: **2**

NCBI accession No.: **gi|132270** Species: *Hevea brasiliensis*

Protein name: Rubber elongation factor protein; Short=REF;

AltName: Allergen=Hev b 1

Mascot score: **142**

Sequence coverage %: **81**

Matched peptides No.: **10**

Total peptides No.: **17**

Calculated Mr: **14713**

Calculated pI: **5.04**

Probability Based Mowse Score:

Protein score is  $-10 \cdot \log(P)$ , where P is the probability that the observed match is a random event. Protein scores greater than 73 are significant ( $p < 0.05$ ).

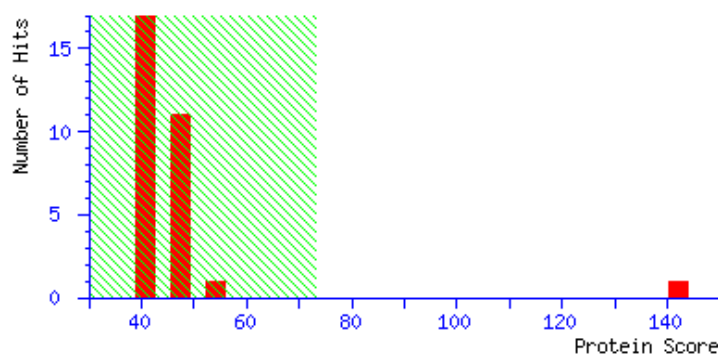

Matched peptide sequences: shown in **Bold Red**:

**1 MAEDEDNQGG QGEGCLKYLG FVQDAATYAVT TFSNVYLFAK DKSGPLQPGV**  
**51 DIIEGPVKNV AVPLYNRFSY IPNGALKFVD STVVASVTII DRSLPPIVKD**  
**101 ASIQVVS AIR APEAARSLA SSLPGQTKIL AKV FYGEN**

Spot No.: **3**

NCBI accession No.: **gi|132270** Species: *Hevea brasiliensis*

Protein name: Rubber elongation factor protein; Short=REF;

AltName: Allergen=Hev b 1

Mascot score: **95**

Sequence coverage %: **56**

Matched peptides No.: **8**

Total peptides No.: **42**

Calculated Mr: **14713**

Calculated pI: **5.04**

Probability Based Mowse Score:

Protein score is  $-10 \cdot \log(P)$ , where P is the probability that the observed match is a random event. Protein scores greater than 73 are significant ( $p < 0.05$ ).

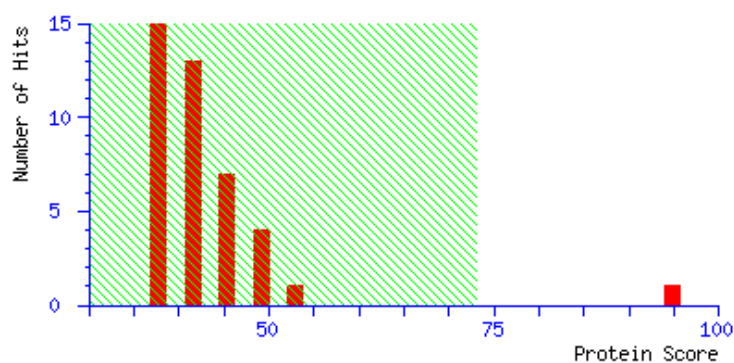

Matched peptide sequences: shown in **Bold Red**:

```
1 MAEDEDNQQG QGEGLKYLGF VQDAATYAVT TFSNVYLFAK DKSGPLQPGV
51 DIIEGPVKNV AVPLYNRFSY IPNGALKFVD STVVASVTII DRSLPPIVKD
101 ASIQVVS AIR AAPEAARSLA SSLPGQTKIL AKVFGYEN
```

Spot No.: 4

NCBI accession No.: [gi|14423933](#) Species: *Hevea brasiliensis*

Protein name: Small rubber particle protein; Short=SRPP; AltName: Full=22 kDa rubber particle protein; Short=22 kDa RPP; AltName: Full=27 kDa natural rubber allergen; AltName: Full=Latex allergen Hev b 3

Mascot score: **119** Sequence coverage %: **75**

Matched peptides No.: **12** Total peptides No.: **52**

Calculated Mr: **22331** Calculated pI: **4.80**

Probability Based Mowse Score:

Protein score is  $-10 \cdot \log(P)$ , where P is the probability that the observed match is a random event. Protein scores greater than 73 are significant ( $p < 0.05$ ).

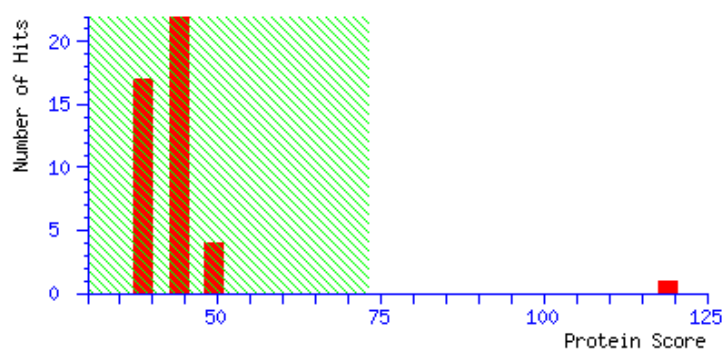

Matched peptide sequences: shown in **Bold Red**:

```
1 MAEEVEEERL KYLDFVRAAG VYAVDSFSTL YLYAKDISGP LKPGVDTIEN
51 VVKTVVTPVY YIPLEAVKfV DKTVDVSVTS LDGVVPPVIK QVSAQTYsvA
101 QDAPRIVLDV ASSVFNTGVQ EGAKALYANL EPKAEQYAVI TwRALNKLPL
151 VPQVANVVVP TAVYFSEKYN DVVRGTTEQG YRVSSYLPLL PTEKIKVfEG
201 DEAS
```

Spot No.: **5**

NCBI accession No.: **gi|14423933** Species: *Hevea brasiliensis*

Protein name: Small rubber particle protein; Short=SRPP; AltName: Full=22 kDa rubber particle protein; Short=22 kDa RPP; AltName: Full=27 kDa natural rubber allergen; AltName: Full=Latex allergen Hev b 3

Mascot score: **122** Sequence coverage %: **85**

Matched peptides No.: **13** Total peptides No.: **55**

Calculated Mr: **22331** Calculated pI: **4.80**

Probability Based Mowse Score:

Protein score is  $-10 \cdot \log(P)$ , where P is the probability that the observed match is a random event. Protein scores greater than 73 are significant ( $p < 0.05$ ).

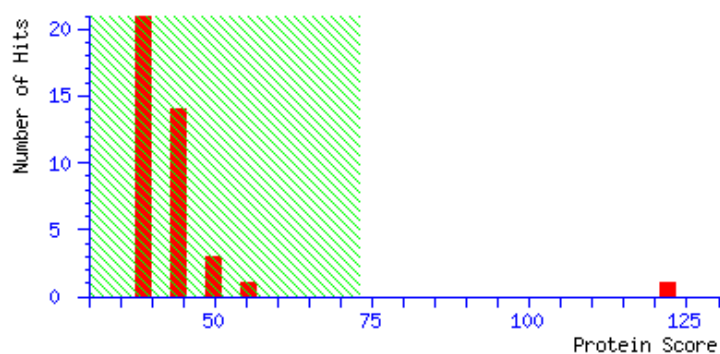

Matched peptide sequences: shown in **Bold Red**:

```
1 MAEEVEEERL KYLDFVRAAG VYAVDSFSTL YLYAKDISGP LKPGVDTIEN
51 VVKTVVTPVY YIPLEAVK FV DKTVDVSVTS LDGVVPPVIK QVSAQTY SVA
101 QDAPRIVLDV ASSVFNTGVQ EGAKALYANL EPKAEQYAVI TWRALNKLPL
151 VPQVANVVVP TAVYFSEKYN DVVRGTTEQG YRVSSYLPLL PTEKITK VFG
201 DEAS
```

Spot No.: **6**

NCBI accession No.: **gi|14423933** Species: *Hevea brasiliensis*

Protein name: Small rubber particle protein; Short=SRPP; AltName: Full=22 kDa rubber particle protein; Short=22 kDa RPP; AltName: Full=27 kDa natural rubber allergen; AltName: Full=Latex allergen Hev b 3

Mascot score: **135** Sequence coverage %: **75**

Matched peptides No.: **12** Total peptides No.: **31**

Calculated Mr: **22331** Calculated pI: **4.80**

Probability Based Mowse Score:

Protein score is  $-10 \cdot \log(P)$ , where P is the probability that the observed match is a random event. Protein scores greater than 73 are significant ( $p < 0.05$ ).

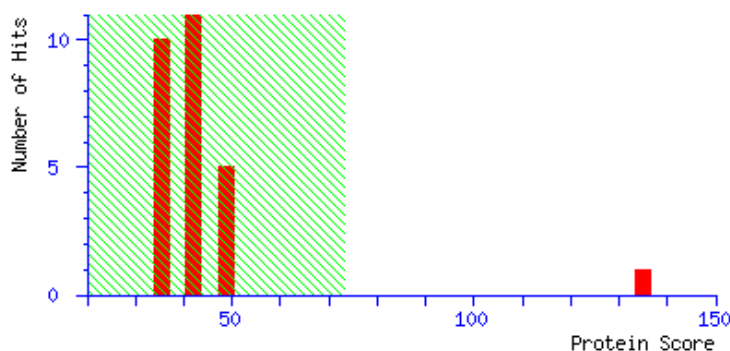

Matched peptide sequences: shown in **Bold Red**:

```
1 MAEEVEEERL KYLDFVRAAG VYAVDSFSTL YLYAKDISGP LKPGVDTIEN
51 VVKTVVTPVY YIPLEAVK FV DKTVDVSVTS LDGVVPPVIK QVSAQTY SVA
101 QDAPRIVLDV ASSVFN TGVQ EGAKALYANL EPKAEQYAVI TWRALNKLPL
151 VPQVANVVVP TAVYFSEKYN DVVRGTTEQG YRVSSYLPLL PTEKITK VFG
201 DEAS
```

Spot No.: 7

NCBI accession No.: [gi| 29170601](#) Species: *Hevea brasiliensis*

PFF score: **[121]** Protein name: [small rubber particle protein](#)

Matched peptides No.: **[2]** Sequence coverage %: **[23]**

Matched sequences: [K.ENENFQQEANEQEEK.L](#);

[K.QLPTQACDTSVK.E](#)

Calculated Mr: **12769**

Calculated pI: **4.61**

Probability Based Mowse Score:

Ions score is  $-10 \cdot \log(P)$ , where P is the probability that the observed match is a random event.

Individual ions scores > 44 indicate identity or extensive homology ( $p < 0.05$ ).

Protein scores are derived from ions scores as a non-probabilistic basis for ranking protein hits.

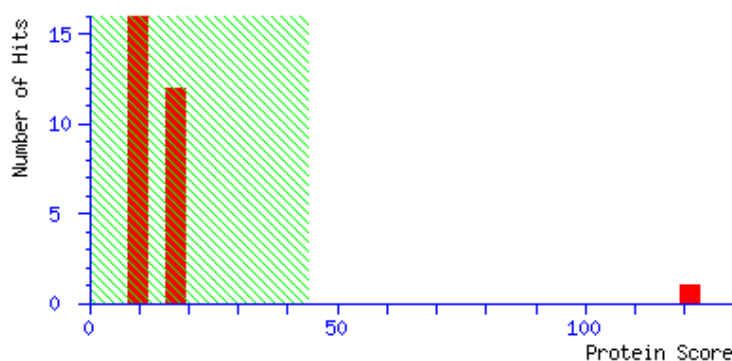

Matched peptide sequences: shown in **Bold Red**

```
1 MAEGKENENF QQEANEQEEK LKYLEFVQAT TDNAVTALSN IYLYAKDNSG
51 PLKPGVETIE GVAKTVVIPA SKIPTEAIKF ADRAVDASFT TLQNIVPSVL
101 KQLPTQACDT SVKESAE
```

Spot No.: 8

NCBI accession No.: [gi|29170601](#) Species: *Hevea brasiliensis*

PFF score: **[110]** Protein name: **small rubber particle protein**

Matched peptides No.: **[1]** Sequence coverage %: **[15]**

Matched sequences: [K.DNSGPLKPGVETIEGVAK.T](#)

Calculated Mr: **12769**

Calculated pI: **4.61**

Probability Based Mowse Score:

Ions score is  $-10 \cdot \log(P)$ , where P is the probability that the observed match is a random event.

Individual ions scores  $> 45$  indicate identity or extensive homology ( $p < 0.05$ ).

Protein scores are derived from ions scores as a non-probabilistic basis for ranking protein hits.

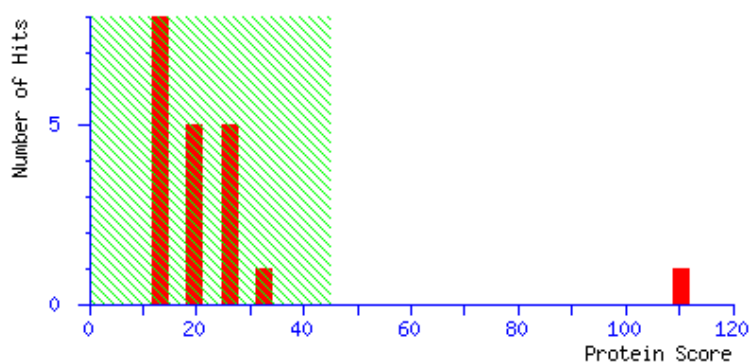

Matched peptide sequences: shown in **Bold Red**:

```
1 MAEGKENENF QQEANEQEEK LKYLEFVQAT TDNAV TALS N IYLYAKDNSG
51 PLKPGVETIE GVAKTVVIPA SKIPTEAIKF ADRAVDASFT TLQNIVPSVL
101 KQLPTQACDT SVKESAE
```



Spot No.: **9**

NCBI accession No.: **gi|388503664** Species: *Lotus japonicus*

Protein name: **unknown**

Mascot score: **93**

Sequence coverage %: **45**

Matched peptides No.: **13**

Total peptides No.: **48**

Calculated Mr: **29537**

Calculated pI: **4.79**

Probability Based Mowse Score:

Protein score is  $-10 \cdot \log(P)$ , where P is the probability that the observed match is a random event. Protein scores greater than 73 are significant ( $p < 0.05$ ).

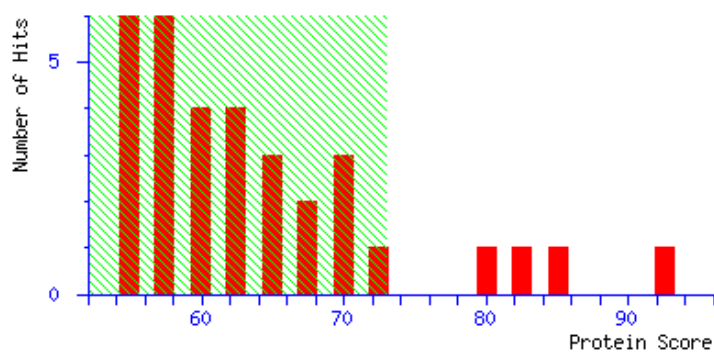

Matched peptide sequences: shown in **Bold Red**:

```
1  MASSKDRGTF VYVAKLAEQA ERYEEMVDSM KKVANLDVEL TVEERNLLSV
51 GYKNVIGARR ASWRILSSIE QKEETKGNDV NAKRIKEYRQ KVESELADIC
101 NDVMRVIDEH LIPSATAGES TVFYKMKGD YYRYLAEFKS GNEKKEAADQ
151 SMKAYESATT AAEAELPPTH PIRLGLALNF SVFYEILNS PERACHLAKQ
201 AFDEAIELD TLNEESYKDS TLIMQLLRDN LTLWTSDIPE EGEDSLKAND
251 TAKVGGGEDA E
```

Spot No.: **10**

NCBI accession No.: **gi|3288200** Species: *Hevea brasiliensis*

Protein name: **latex allergen**

Mascot score: **209**

Sequence coverage %: **68**

Matched peptides No.: **22**

Total peptides No.: **42**

Calculated Mr: **43020**

Calculated pl: **5.00**

Probability Based Mowse Score:

Protein score is  $-10 \cdot \log(P)$ , where P is the probability that the observed match is a random event. Protein scores greater than 73 are significant ( $p < 0.05$ ).

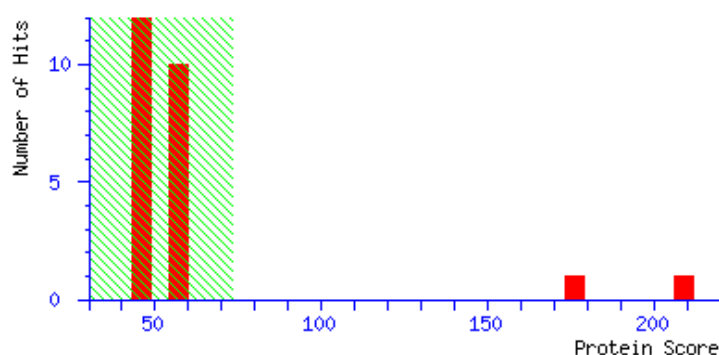

Matched peptide sequences: shown in **Bold Red**:

1 MATG**STTLTQ** GKKITVLSID GGGIRGIIPG IILASLESKL QDL**DGPDARI**  
51 ADYFD**IIAGT** STGGLIT**TML** TAP**NEDKKPI** YQAKDIKDFY LENC**PKIFPK**  
101 ESRD**TYDPIH** SIGPIYD**GEY** LREL**CNNLLK** DLT**VKDTLTD** VIIPAF**DIKL**  
151 LLPV**IFSSDD** AKCNAL**KNAR** LADV**CISTSA** APVLL**PAHSF** TTED**DKNIHT**  
201 FELIDGG**VAA** ANPTLL**LALTH** IRNE**IIRQNP** RFI**GANTES** KSRLVLS**LGT**  
251 GKSEY**KEYN** AD**MTSKWRLY** NWALYNGNS**P** AVDIFSNASS DMVDFHLSAL  
301 F**KS**LD**CE**DY**Y** LRIQDD**TLTG** EESS**GHIATE** ENLQRL**VEIG** TELL**E**Q**ESR**  
351 INLD**TGRLES** IPGAPT**NEAA** IAK**FAKLLSE** ER**KLRQLK**

Spot No.: **11**

NCBI accession No.: **gi|6707018** Species: *Hevea brasiliensis*

Protein name: **latex protein allergen Hev b 7**

Mascot score: **172**

Sequence coverage %: **45**

Matched peptides No.: **17**

Total peptides No.: **45**

Calculated Mr: **43107**

Calculated pI: **5.00**

Probability Based Mowse Score:

Protein score is  $-10 \cdot \log(P)$ , where P is the probability that the observed match is a random event. Protein scores greater than 73 are significant ( $p < 0.05$ ).

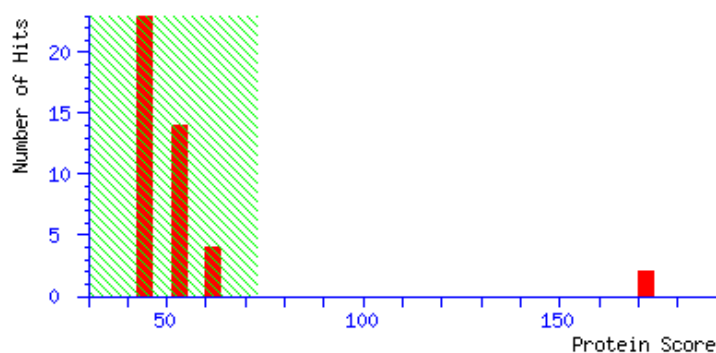

Matched peptide sequences: shown in **Bold Red**:

```
1  MATGSTPLTQ  GKKITVLSID  GGGIRGIIPG  IILASLESKL  QDLDGPDARI
51  ADYFDIIAGT  STGGLITTML  TAPNEDKKPM  YQAKDIKDFY  LENCPKIFPK
101  ESRDNYDPIH  SIGPIYDGEY  LRELCNLLK  DLTVKDTLTD  VIIPTFDIKL
151  LLPVIFSSDD  AKCNALKNAR  LADVCISTSA  APVLLPAHSF  TTEDDKNIHT
201  FELIDGGVAA  TNPTLLALTH  IRNEIIRQNP  RFIGANLTES  KSRLVLSLGT
251  GKSEYKEKYN  ADMTSKWRLY  NWALYNGNSP  AVDIFSNASS  DMVDFHLSAL
301  FKSLDCEDYY  LRIQDDTLTG  EESSGHIATE  ENLQRLVEIG  TELLEKQESR
351  INLDTGRLES  IPGAPTNEAA  IAKFAKLLSE  ERKLRQLK
```

Spot No.: **12**

NCBI accession No.: **gi|4235430** Species: *Hevea brasiliensis*

Protein name: **latex-abundant protein**

Mascot score: **82**

Sequence coverage %: **49**

Matched peptides No.: **15**

Total peptides No.: **29**

Calculated Mr: **46443**

Calculated pI: **5.01**

Probability Based Mowse Score:

Protein score is  $-10 \cdot \log(P)$ , where P is the probability that the observed match is a random event. Protein scores greater than 73 are significant ( $p < 0.05$ ).

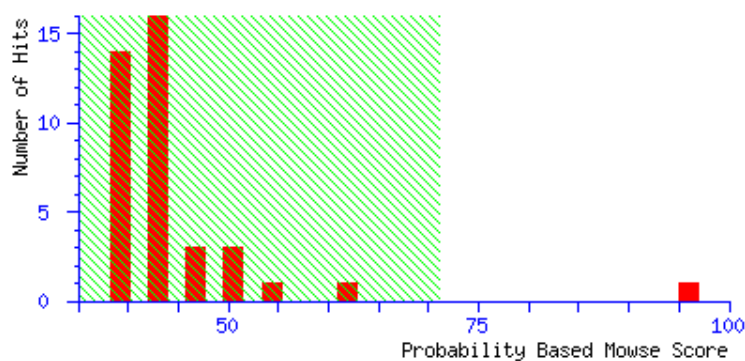

Matched peptide sequences: shown in **Bold Red**:

```
1  MAKKAVLIGI  NYPGTKAELK  GCINDVKRMY  RCLVDRYGFS  EEDITVLLIDI
51 DESYIQPTGK  NIRRVLTDLV  RSAEPGDLIF  VHYSGHGTRL  PAETGEDDDT
101 GFDECIVPCD MNLITDDDFR EFVDQVPHGC RITVVSDSCH SGGLIDEAKE
151 QIGESTKRKE  EESESGFGFK  SFLKQTIQDA  FESRGVHLPS DLHHHHGHRD
201 EEDFDNRVVE EDYGDSGYVK SKSLPLSTLI EILKQKTGKD DIDVGKLRPT
251 LDFMFGDDAS PKVKKFMKVI LNKLRHGDGE SGGGGFLGMV GSLAQEFLKH
301 KLDENDESIV  KPALETEVDS  KQEVYAGKTK  RSLPDGGILI  SGCQTDQ TSA
351 DASPSGKSSE  AYGALSNAIQ  TIIAETDGAV  TNQELVLKAR  KMLKKQGFTQ
401 KPGLYCSDDH VEASFVC
```

Spot No.: **13**

NCBI accession No.: **gi|4235430** Species: *Hevea brasiliensis*

Protein name: **latex-abundant protein**

Mascot score: **96**

Sequence coverage %: **54**

Matched peptides No.: **15**

Total peptides No.: **37**

Calculated Mr: **46443**

Calculated pI: **5.01**

Probability Based Mowse Score:

Protein score is  $-10 \cdot \log(P)$ , where P is the probability that the observed match is a random event. Protein scores greater than 73 are significant ( $p < 0.05$ ).

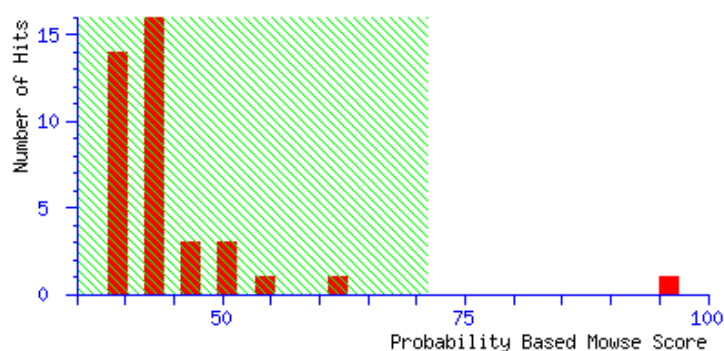

Matched peptide sequences: shown in **Bold Red**:

```
1  MAKKAVLIGI  NYPGTKAELK  GCINDVKRMY  RCLVDRYGFS  EEDITVVLIDI
51  DESYIQPTGK  NIRRVLTDLV  RSAEPGDLLF  VHYSGHGTRL  PAETGEDDDT
101 GFDECIVPCD  MNLITDDDFR  EFVDQVPHGC  RITVVSDSCH  SGGLIDEAKE
151 QIGESTKRKE  EESESGFGFK  SFLKQTIQDA  FESRGVHLPS  DLHHHHGHRD
201 EEDFDNRVVE  EDYGDSGYVK  SKSLPLSTLI  EILKQKTGKD  DIDVGKLRPT
251 LFDMPGDDAS  PKVKKFMKVI  LNKLRHGDE  SGGGGFLGMV  GSLAQEFLKH
301 KLDENDESIV  KPALETEVDS  KQEVYAGKTK  RSLPDGGILI  SGCQTDQ TSA
351 DASPSGKSSE  AYGALSNAIQ  TIIAETDGAV  TNQELVLKAR  KMLKKQGFTQ
401 KPGLYCSDDH  VEASFVC
```

Spot No.: **14**

NCBI accession No.: **gi|20559** Species: *Petunia x hybrida*

Protein name: **hsp70 (AA 6 - 651)**

Mascot score: **103**

Sequence coverage %: **40**

Matched peptides No.: **24**

Total peptides No.: **41**

Calculated Mr: **71137**

Calculated pl: **5.07**

Probability Based Mowse Score:

Protein score is  $-10 \cdot \log(P)$ , where P is the probability that the observed match is a random event. Protein scores greater than 73 are significant ( $p < 0.05$ ).

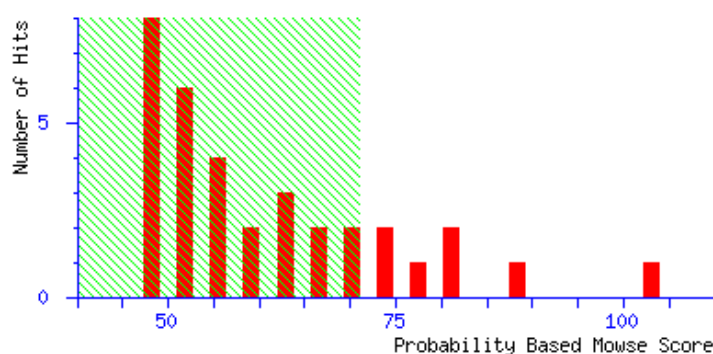

Matched peptide sequences: shown in **Bold Red**:

```
1  EGPAIGIDLG  TTYSCVGVWQ  HDRVEIIAND  QGNRTTPSYV  GFTDTERLIG
51  DAAKNQVAMN  PINTVFDAKR  LIGRRFSDPS  VQSDIKLWPF  KVIPGPGDKP
101 MIVVTYKGEE  KQFAAEEISS  MVLTKMKEIA  EAYLGTTIRN  AVVTVPAYFN
151 DSQRQATKDA  GVIAGLNVMR  IINEPTAAAI  AYGLDKKASS  AGEKNVLI FD
201 LGGGTFDVSL  LTIEEGIFEV  KATAGDTHLG  GEDFDNRMVN  HFVQEFKRKN
251 KKDISGNPRA  LRRLRTACER  AKRTLSSTAQ  TTIEIDSLYE  GIDFYSTITR
301 ARFEELNMDL  FRKCMPEVEK  CLRDAKMDKS  SVHDVVLVGG  STRIPKVQQL
351 LQDFFNKEL  CKSINPDEAV  AYGAAVQAAI  LSGEGNEKVQ  DLLLLDVTPL
401 SLGLETAGGG  MTVLIPRNTT  IPTKKEQVFS  TYSDNQPGVL  IQVYEGERAR
451 TKDNNLLGKF  ELSGIPPAPR  GVPQITVCFD  IDANGILNVS  AEDKTTGQKN
501 KITITNDKGR  LSKEEIERMV  QEAKEYKSED  EELKKKVEAK  NALENYAYNM
551 RNTIKDDKIN  SQLSAADKKR  IEDAIDEAIK  WLDNNQLAEA  DEFEDKMKEL
601 ESICNPIIAK  MYQGGAGGAT  MDLEDGPSVGG  SAGSQTGAGP  KIEEVD
```

Spot No.: **15**

NCBI accession No.: **gi|58013197** Species: *Isatis tinctoria*

Protein name: **actin**

Mascot score: **142**

Sequence coverage %: **51**

Matched peptides No.: **16**

Total peptides No.: **36**

Calculated Mr: **42020**

Calculated pI: **5.31**

Probability Based Mowse Score:

Protein score is  $-10 \cdot \log(P)$ , where P is the probability that the observed match is a random event. Protein scores greater than 73 are significant ( $p < 0.05$ ).

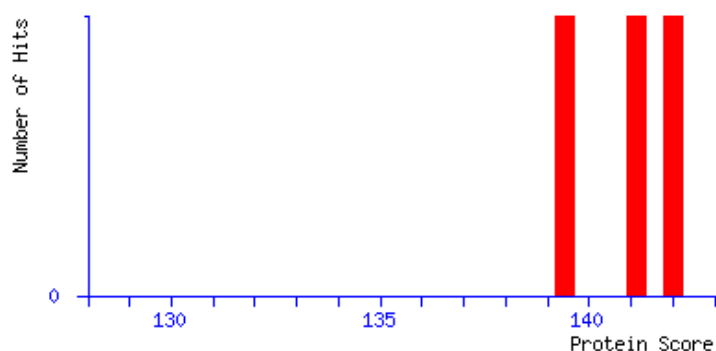

Matched peptide sequences: shown in **Bold Red**:

```
1  MADGEDIQPL  VCDNGTGMVK  AGFAGDDAPR  AVFPSIVGRP  RHTGVTVWMG
51  QKDAYVGVDEA  QSKRGILTLK  YPIEHGIVSN  WDDMEKIWHH  TFYNELRVAP
101 EEHPVLLTEA  PLNPKANREK  MTQIMFETFN  VPAMYVAIQA  VLSLYASGRT
151 TGIVLDSGDG  VSHTVPIYEG  YALPHAILRL  DLAGRDLTDS  LMKILTERGY
201 MFTTTAEREI  VRDIKEKLAY  VALDYEQELE  TAKSSSSVEK  NYELPDGQVI
251 TIGAERFRCP  EILFQPSLIG  MEAPGIHETT  YNSIMKCDVD  IRKDLYGNIV
301 LSGGSTMFPG  IAD RMSKEIT  ALAPSSMKIK  VVAPPERKYS  VWIGGSILAS
351 LSTFQQMWIS  KGEYDESGPS  IVHRKCF
```



Spot No.: **16**

NCBI accession No.: [gi|2506211](#)

Species: *Vigna radiata var. radiata*

Protein name: V-type proton ATPase catalytic subunit A

PMF Mascot score: **145**

Sequence coverage %: **45**

Matched peptides No.: **27**

Total peptides No.: **69**

Calculated Mr: **68923**

Calculated pI: **5.30**

Probability Based Mowse Score:

Protein score is  $-10 \cdot \log(P)$ , where P is the probability that the observed match is a random event. Protein scores greater than 73 are significant ( $p < 0.05$ ).

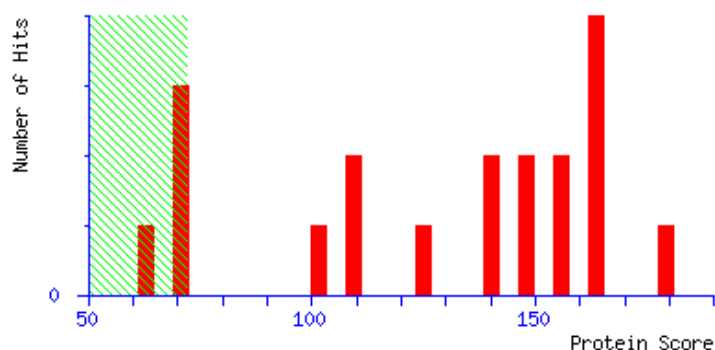

Matched peptide sequences: shown in **Bold Red**:

```
1  MPAVYGARLT  TFEDSEKES  YGYVRKVS GP  VVVADGMAGA  AMYELVRVGR
51  DNLIGEIIRL  EGDSATIQVY  EETAGLMVND  PVLRTHKPLS  VELGPGIILGN
101 IFDGIQRPLK  TIAKRSGDVY  IPRGVSVPAL  DKDTLWEFQP  KKIGEGDLLT
151  GGDLYATVFE  NTLMQHHIAL  PPDAMGKITY  IAPPGQYSIT  DTVLELEFQG
201  VKKKFTMLQT  WPVRTPRPVA  SKLAADTPLL  TGQRVLDALF  PSVLGGTCAI
251  PGAFGCGKTV  ISQALSKYSN  SDAVVYVCGG  ERGNEMAEVL  MDFPQLTMTL
301  PDGREESVMK  RTTLVANTSN  MPVAAREASI  YTGITLAEYF  RDMGYNVSM
351  ADSTSRWAEA  LREISGRLAE  MPADSGYPAY  LAARLASFYE  RPGKVKCLGG
401  PERTGSVTIV  GAVSPPGGDF  SDPVSATLS  IVQVFWGLDK  KLAQRKHFPS
451  VNWLISYSKY  STALESFYEQ  FDPDFINIRT  KAREVLQRED  DLNEIVQLVG
501  KDALAEGDKI  TLETAKLLRE  DYLAQNAFTP  YDKFCPFYKS  VMMRNIHF
551  YNLANQAVER  GAGSDGQKIT  YSLIKHRVGD  LFYRLVSQKF  EDPAEGEAAL
601  VGQFQKLHED  LSTGFRNLED  ETR
```



Spot No.: **17**

NCBI accession No.: [gi|357480067](#) Species: *Medicago truncatula*

Protein name: [Leucine aminopeptidase](#)

Mascot score: **92**

Sequence coverage %: **31**

Matched peptides No.: **16**

Total peptides No.: **69**

Calculated Mr: **59856**

Calculated pI: **7.56**

Probability Based Mowse Score:

Protein score is  $-10 \cdot \log(P)$ , where P is the probability that the observed match is a random event. Protein scores greater than 73 are significant ( $p < 0.05$ ).

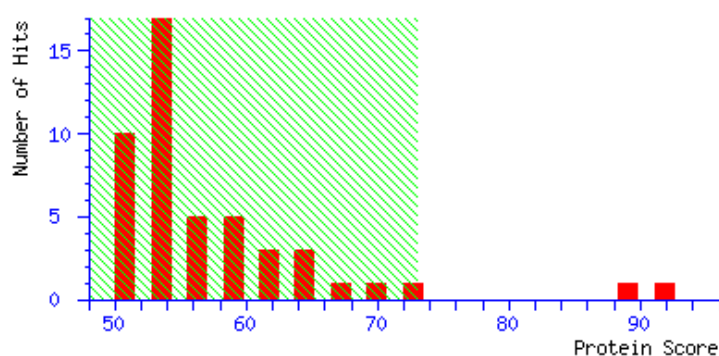

Matched peptide sequences: shown in **Red**:

```
1  MAAIASAIVI  AFSKSSSSSL  FLTSRIRFAS  FPKRSFHSTT  KLMSQSRYTT
51  LGLTHPTNIE  APKISFSATD  VDVTEWKGDI  LAVGVTEKDL  TRDAKSRFEN
101  SILNKIDLKL  DGLLSEASSE  EDFSGKVGQS  TVVRIKGLGS  KRVGLIGLGQ
151  LPSTTALYKG  LGEAVVAVAK  SAQASNVAIV  LASSEGLSSE  SKLSTAYAIA
201  SGAVLGLFED  QRYKSESKKP  AVRSIDIIGL  GTGPDLEKKL  KYAGDVSSGI
251  IFGRELVNSP  ANVLTPGVLA  EEASKVASTY  SDVFTAKILD  ADQCKELKMG
301  SYLGVAASA  NPPRFIHLTY  KPPSGSVKVK  LALVGKGLTF  DSGGYNIKTG
351  PGCSIELMKF  DMGGSAAVLG  AAKALGQIKP  LGVEVHFIVA  ACENMISGTG
401  MRPGDVVTAS  NGKTIEVNNT  DAEGRLTLAD  ALVYACNQGV  EKIIDLATLT
451  GACVVALGPS  IAGVFSPNDE  LVKEVLEASE  VSGEKLWRLP  IEESYWESMK
501  SGVADMVNTG  GRPGG SITAA  LFLKQFVDEK  VQWLHIDMAG  PVWNDKKRSA
551  TGFGVSTLVE  WVLKNSS
```

Spot No.: **18**

NCBI accession No.: [gi|219885949](#) Species: *Zea mays*

Protein name: [unknown](#)

Mascot score: **81**

Sequence coverage %: **35**

Matched peptides No.: **8**

Total peptides No.: **46**

Calculated Mr: **30752**

Calculated pI: **5.91**

Probability Based Mowse Score:

Protein score is  $-10 \cdot \log(P)$ , where P is the probability that the observed match is a random event. Protein scores greater than 73 are significant ( $p < 0.05$ ).

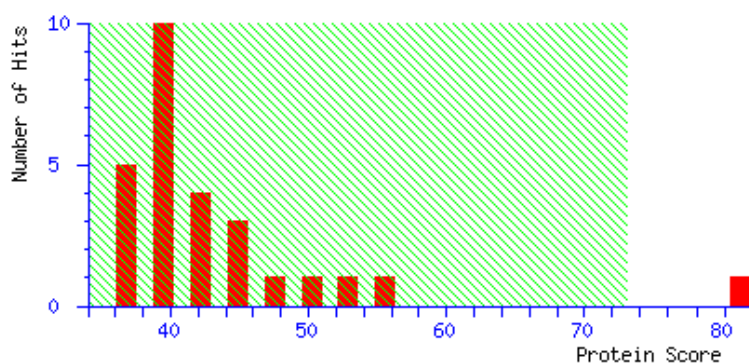

Matched peptide sequences: shown in **Bold Red**:

```
1  MALAAVIRSS  RATMMELEI  ELKKASDKLK  SWDATSISLS  AACDLFMRFV
51  TRTSHLEHEK  FDAAKSRLIE  RGEKFGEISL  KARKTIAMLS  QDFIYDGCTI
101 LVHGYSRVVL  EVLKLAASNR  KLFrvLCTEG  RPDRTGLRMS  NELAALGIPV
151 KVLIDSAVAY  SIDEVDMVFV  GADGVVESGG  IINMMGTYQI  ALVAHTMDKP
201 VYVAAESHKF  ARLYPLDQKD  MTPAHRPIDF  GVPIPIGVEV  ETSARDYTPP
251 QYLTLTLLTDL  GVLTPSVVSD  ELIQLYL
```

Spot No.: **19**

NCBI accession No.: [gi|242059605](#)

Species: *Sorghum bicolor*

PFF score: **[101]**

Protein name: [hypothetical protein SORBIDRAFT\\_03g043200](#)

Matched peptides No.: **[1]** Sequence coverage %: **[6]**

Matched sequences: [R.FFPSEFGNDVDHVHAVEPAK.S;](#)

Calculated Mr: **34294**

Calculated pI: **5.93**

Probability Based Mowse Score:

Ions score is  $-10 \cdot \log(P)$ , where P is the probability that the observed match is a random event.

Individual ions scores  $> 43$  indicate identity or extensive homology ( $p < 0.05$ ).

Protein scores are derived from ions scores as a non-probabilistic basis for ranking protein hits.

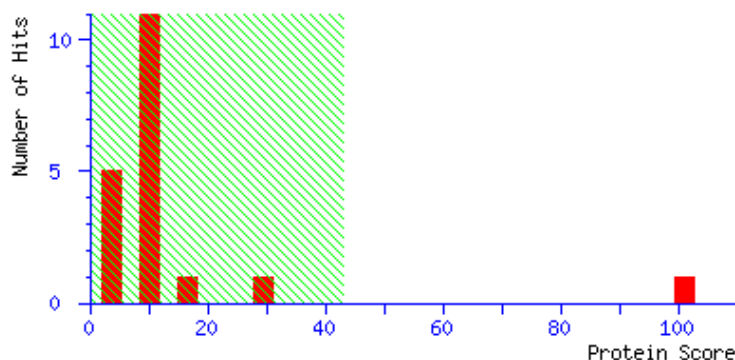

Matched peptide sequences: shown in **Bold Red**:

```
1  MSSAAGHKER  SRVLVIGGTG  YIGRFIVAAS  AREGHPTYVL  VRDPAPADPA
51  KAAVLQGFRD  AGVTLVKGDL  YNHESLVVAM  ESADVVISAV  GYAQLPDQTR
101 IISAIKDAGN  IKRFFPSEFG  NDVDHVHAVE  PAKSVFAAKA  SIRRAVEAEG
151 IPYTYISSNF  FAGRFLPAIG  QIGVTGLPID  KVLILGDGNV  KAIFGTEEDV
201 GTYTIKAVDD  PRTLKILYL  RPPSNILSHN  ELISLWEKKV  GKTFERVYIP
251 EDDVLKKIQE  SPIPLNRALS  ISHSAWVKGD  HTNFEIDPFF  GVEATDLYPD
301 VKYTTVDEYL  NKFL
```

Spot No.: **20**

NCBI accession No.: [gi|30575570](#) Species: *Citrus x paradisi*

**PFF** score: **[86]** Protein name: HSP19 class II, partial

Matched peptides No.: **[1]** Sequence coverage %: **[15]**

Matched sequences: [K.VQVEDDNVLLISGER.K;](#)

Calculated Mr: **11191**

Calculated pI: **8.01**

Probability Based Mowse Score:

Ions score is  $-10 \cdot \log(P)$ , where P is the probability that the observed match is a random event. Individual ions scores  $> 44$  indicate identity or extensive homology ( $p < 0.05$ ). Protein scores are derived from ions scores as a non-probabilistic basis for ranking protein hits.

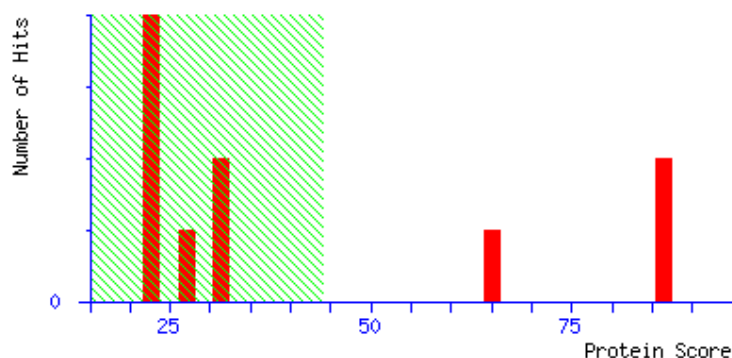

Matched peptide sequences: shown in **Bold Red**:

```
1 YVFIVDMPGL KSGDIKVQVE DDNVLLISGE RKREEEKDGA KYVRMERRVG  
51 KFMRKFLVPE NANVEAISAV CQDGVLTITV DKLPPPEPKK PKTIEVKIA
```

Spot No.: **21**

NCBI accession No.: [gi|27449246](#) Species: *Hevea brasiliensis*

Protein name: [Cu/Zn superoxide dismutase](#)

Mascot score: **83**

Sequence coverage %:**48**

Matched peptides No.: **7**

Total peptides No.: **21**

Calculated Mr: **15726**

Calculated pI: **5.73**

Probability Based Mowse Score:

Protein score is  $-10 \cdot \log(P)$ , where P is the probability that the observed match is a random event. Protein scores greater than 73 are significant ( $p < 0.05$ ).

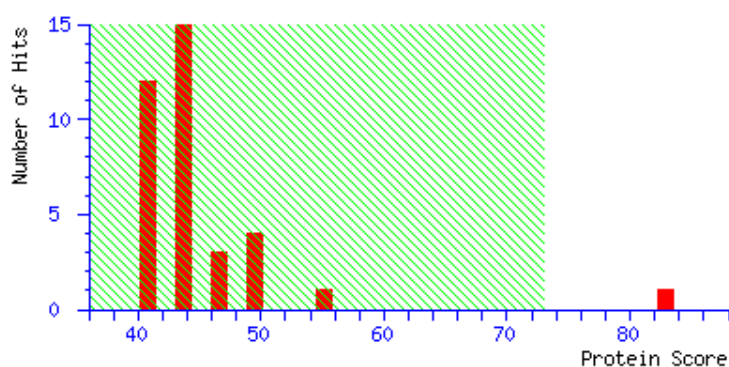

Matched peptide sequences: shown in **Bold Red**:

```
1 MLKAVAVITS SEGISGKIFF TQEGDGPTTV TGSVSGLKPG LHGFHVHTFG
51 DTTNGCLSTG LHFNPASKDH GGPEDENRHA GD LGNVNVGD DGTANFTIVD
101 KHIPLSGPHS IAGRSVVFHE GRDDLKGGH ELSKITGNAG DRIACGIIGL
151 QE
```

Spot No.: **22**

NCBI accession No.: [gi|37806305](#)

Species: *Oryza sativa Japonica Group*

PFF score: **[60]** Protein name: [hypothetical protein](#)

Matched peptides No.: **[2]** Sequence coverage %: **[3]**

Matched sequences: [K.LGTLVLGDRPRL](#) ; [K.LGTLVLGDRPRL](#)

Calculated Mr: **35105**

Calculated pI: **8.29**

Probability Based Mowse Score:

Ions score is  $-10 \cdot \log(P)$ , where  $P$  is the probability that the observed match is a random event. Individual ions scores  $> 45$  indicate identity or extensive homology ( $p < 0.05$ ). Protein scores are derived from ions scores as a non-probabilistic basis for ranking protein hits.

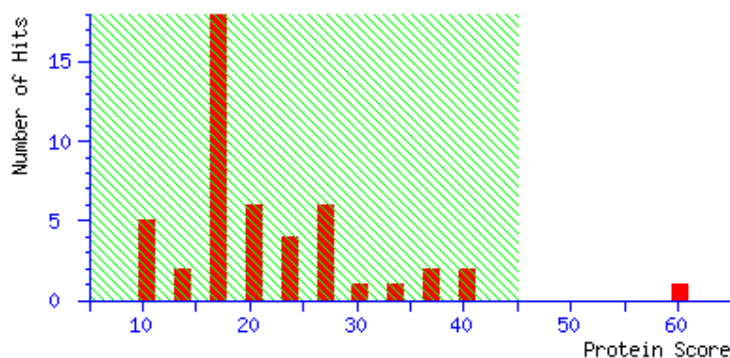

Matched peptide sequences: shown in **Bold Red**:

```
1  MEVFQGVQFA  RLRNWEETY  VTADEDGRSV  YHYAPDRHRP  AHEAIWAVQM
51  VLAGAPPTQY  VLLRGAYGRY  LGAPDAVVRV  WPLSCCWPAP  VVGQRDFDQP
101 EVDAIMWRAV  RRADHVLCLH  DKSGRYLRGK  LGTLVLGDRP  RLTVGDGRLN
151 DDEKALRWEV  LPVLPNPGRP  ELPISIVPEA  DLVGRLVKAC  FLPLQREIQF
201 VEADDDGNIG  EGQEVWDSFQ  YEGRSVQLLR  NELEDRVGYA  ITVCVRAGRH
251 GQHSPLLINL  PHSRETLHIV  VLRRNSEADN  QLTFFDPKAS  SRRRYRHRRR
301 AIIQ
```

Spot No.: **23**

NCBI accession No.: **gi|10946499**

Species: *Hevea brasiliensis*

Protein name: **beta-1,3-glucanase**

Mascot score: **85**

Sequence coverage %:**43**

Matched peptides No.: **14**

Total peptides No.: **53**

Calculated Mr: **35295**

Calculated pI: **9.46**

Probability Based Mowse Score:

Protein score is  $-10 \cdot \log(P)$ , where P is the probability that the observed match is a random event. Protein scores greater than 73 are significant ( $p < 0.05$ ).

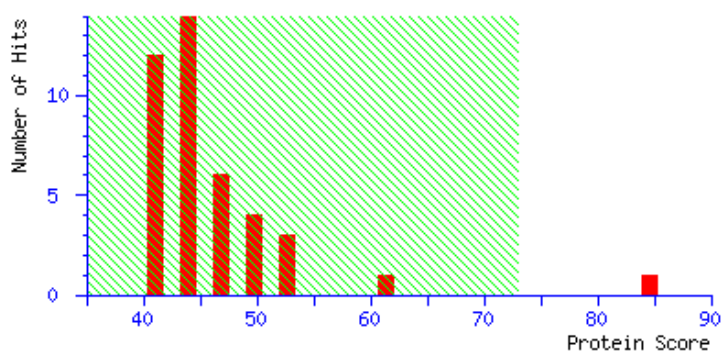

Matched peptide sequences: shown in **Bold Red**:

```
1 QVGVCYGMQG NNLPPVSEVI ALYKKSNI TR MRIYDPNRAV LEALRGSNIE
51 LILGVPNSDL QSLTNPSNAK SWVQKNVRGF WSSVLF RYIA VGNEISPVNR
101 GTAWLAQFVL PAMRNIHDAI RSAGLQDQIK VSTAILDLTV GNSYPPSAGA
151 FRDDVRSYLN PIIRFLSSIR SPLLANIYPY FTYAGNPRDI SLPYALFTSP
201 SVVVWDGQRG YKNLFDATLD VLYSALERAS GGSLEV VVSE SGWPSAGAF A
251 ATFDNGR TYL SNLIQHVKRG TPKRPNRAIE TYLFAMFDEN KKQPEVEKQF
301 GLFFPKWQK YNLNFG
```



Spot No.: **24**

NCBI accession No.: **gi|78216493** Species: *Malus x domestica*

Protein name: **cytosolic malate dehydrogenase**

Mascot score: **82**

Sequence coverage %: **54**

Matched peptides No.: **15**

Total peptides No.: **50**

Calculated Mr: **35970**

Calculated pI: **6.01**

Probability Based Mowse Score:

Protein score is  $-10 \cdot \log(P)$ , where P is the probability that the observed match is a random event. Protein scores greater than 73 are significant ( $p < 0.05$ ).

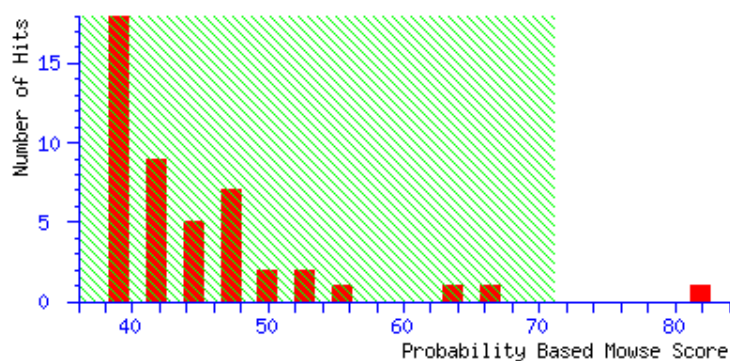

Matched peptide sequences: shown in **Bold Red**:

```
1  MAKEPVRVLV  TGAAGQIGYA  LVPMIARGIM  LGADQPVI LH  LLDIPPAAEA
51  LNGVRMELVD  AAFPLLKGVV  ATTDVVEACT  GVNIAMVGG  FPRKEGMERK
101 DVMTKRVSIY  KSQASALEKH  AAPNCKVLVV  ANPANTNALI  LKEFAPSIPE
151 KNVTCLTRLD  HNRALGQVSE  RLNVQVSDVK  NVIIWGNHSS  SQYPDVNHAT
201 VKTPSGEKCV  RELVADDAWL  NGEFISTVQQ  RGAAIKARK  LSSALSAASS
251 ACDHIRDWVL  GTPEGTWVSM  GVYSDGSYDV  PSGLIFSFPV  TCQHGEWKIV
301 QGLSIDEFSR  KKLDATAEEL  SEEKALAYSC  LS
```



Spot No.: **25**

NCBI accession No.: [gi|257219562](#) Species: *Jatropha curcas*

**PFF** score: **[81]** Protein name: [annexin-like protein](#)

Matched peptides No.: **[2]** Sequence coverage %: **[5]**

Matched sequences: [K.AFEGWGTNEK.A](#) ; [R.WILDPEDR.D](#)

Calculated Mr: **36015**

Calculated pI: **6.41**

Probability Based Mowse Score:

Ions score is  $-10 \cdot \log(P)$ , where P is the probability that the observed match is a random event.

Individual ions scores  $> 45$  indicate identity or extensive homology ( $p < 0.05$ ).

Protein scores are derived from ions scores as a non-probabilistic basis for ranking protein hits.

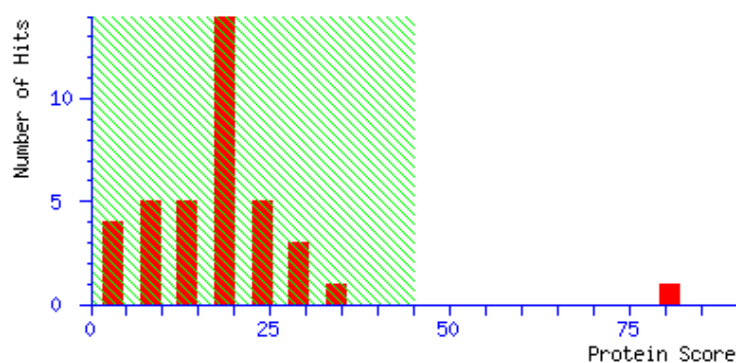

Matched peptide sequences: shown in **Bold Red**:

```
1  MATIVVPANV SYVEDAETLR KAFEGWGTNE KAVIAVLGHR NAVQKKHIRQ
51  AYWDLYQEDL VKRLESELGG DFERAMYRWI LDPEDRDAVL ANVALRKSGD
101 FHVIVEIACA RSAEELLVLR RAYQARYKHS LEEDVATHTT GDIRKLLVGL
151 VTAFMYEGAE INTRLAKSEA DVLQEAIKDK HFNHDEVIRI LTTRSKTQLN
201 TTFNHFKDDH GTSITKALLG EKADNEFVRL LSIAIRTMNE PLKYYEKVLR
251 NAIKRIGTDE DALTRVIVTR AEKDLLHIKE LYPKRNNVPL DHAVDKEIHG
301 DYKHFLALL GHQD
```

Spot No.: **26**

NCBI accession No.: [gi|3451147](#) Species: *Hevea brasiliensis*

**PFF** score: **[56]** Protein name: **chitinase**

Matched peptides No.: **[1]** Sequence coverage %: **[4]**

Matched sequences: [K.VYLTAAPQCPFPDR.Y](#)

Calculated Mr: **34138**

Calculated pI: **8.72**

Probability Based Mowse Score:

Ions score is  $-10 \cdot \log(P)$ , where P is the probability that the observed match is a random event.

Individual ions scores  $> 44$  indicate identity or extensive homology ( $p < 0.05$ ).

Protein scores are derived from ions scores as a non-probabilistic basis for ranking protein hits.

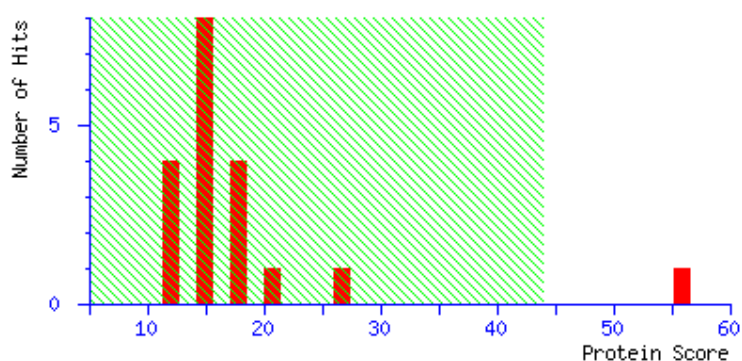

Matched peptide sequences: shown in **Bold Red**:

```
1  MAKRTQAILL  LLLAISLIMS  SSHVDGGGIA  IYWGQNGNEG  TLTQTCSTRK
51  YSYVNIAFLN  KFGNGQTPQI  NLAGHCNPAA  GGCTIVSNGI  RSCQIQGIKV
101 MLSLGGGIGS  YTLASQADAK  NVADYLWNNF  LGGKSSSRPL  GDAVLGDIDF
151 DIEHGSTLYW  DDLARYLSAY  SKQGKKVYLT  AAPQCPFPDR  YLGTALNTGL
201 FDYVWVQFYN  NPPCQYSSGN  INNIINSWNR  WTTSINAGKI  FLGLPAAPEA
251 AGSGYVPPDV  LISRILPEIK  KSPKYGGVML  WSKFYDDKNG  YSSSIRDSVL
301 FLHSEKMTV  L
```

Spot No.: **27**

NCBI accession No.: **gi|4469175** Species: *Hevea brasiliensis*

Protein name: **beta-1,3-glucanase**

Mascot score: **97** Sequence coverage %: **46**

Matched peptides No.: **16** Total peptides No.: **107**

Calculated Mr: **38930** Calculated pI: **9.45**

Probability Based Mowse Score:

Protein score is  $-10 \cdot \log(P)$ , where P is the probability that the observed match is a random event. Protein scores greater than 73 are significant ( $p < 0.05$ ).

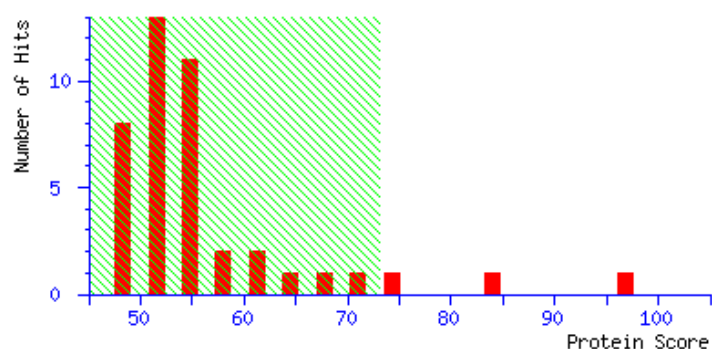

Matched peptide sequences: shown in **Bold Red**:

```
1  MAISSSTSGT SSSLPSRTTV MLLLFFFAAS VGITDAQVGV CYGMQGNLNP
51 PVSEVIALYK KSNITRMRIY DPNRAVLEAL RGSNIELILG VPNSDLQSLT
101 NPSNAKSWVQ KNVRGEWSSV LFRYIAVGNE ISPVNRGTAW LAQFVLPAMR
151 NIHDAIRSAG LQDQIKVSTA IDLTLVGNSY PPSAGAFRDD VRSYLNPIIR
201 FLSSIRSPLL ANIYPYFTYA GNPRDISLPY ALFTSPSVVV WDGQRGYKNL
251 FDATLDVLYS ALERASGGSL EVVVESESWP SAGAFATFD NGRTYLSNLI
301 QHVKRGTPKR PNRAIETYLE AMFDENKKQP EVEKQFGLFF PDKWQKYNLN
351 FG
```

Spot No.: **28**

NCBI accession No.: **gi|124365253** Species: *Hevea brasiliensis*

Protein name: **beta-1,3-glucanase**

Mascot score: **99**

Sequence coverage %:**37**

Matched peptides No.: **15**

Total peptides No.: **44**

Calculated Mr: **41543**

Calculated pI: **9.40**

Probability Based Mowse Score:

Protein score is  $-10 \cdot \log(P)$ , where P is the probability that the observed match is a random event. Protein scores greater than 73 are significant ( $p < 0.05$ ).

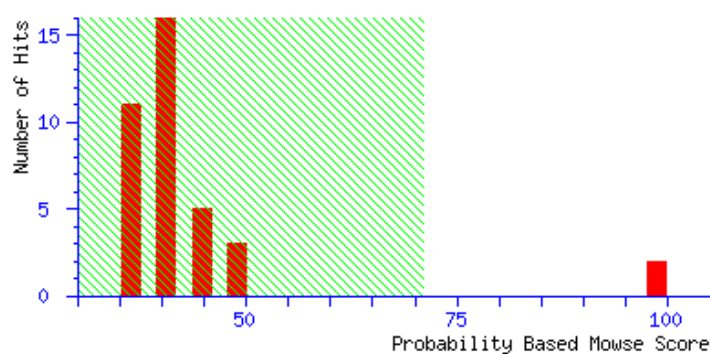

Matched peptide sequences: shown in **Bold Red**:

```
1  MAISSSTSGT  SSSLPSRTTV  MLLLFFFTAS  VGITDAQVGV  CYGMQGNNLP
51  PVSEVIALYK  KSNITRMRIY DPNQAVLEAL RGSNIELILG VPNSDLQSLT
101 NPSNAKSWVQ  KNVRGFWSSV  RFRYIAVGNE  ISPVNRGTAW LAQFVLPAMR
151 NIHDAIRSAG LQDQIKVSTA IDLTLVGNSY PPSAGAFRDD VRSYLNPIIR
201 FLSSIRSPLL ANIYPYFTYA  GNPRDISLPY  ALFTSPSVVV  WDGQRGYKNL
251 FDATLDALYS ALERASGGSL EVVVSESGWP  SAGAFATFD  NGRTYLSNLI
301 QHVKRGTPKR PKRAIETYLE AMFDENKKQP EVEKHFGLEF PNKWQKYNLN
351 FSAEKNWDIS  TEHNATILFL  KSDM
```

Spot No.: **29**

NCBI accession No.: **gi|124365253** Species: *Hevea brasiliensis*

Protein name: **beta-1,3-glucanase**

Mascot score: **109**

Sequence coverage %:**38**

Matched peptides No.: **15**

Total peptides No.: **35**

Calculated Mr: **41543**

Calculated pl: **9.40**

Probability Based Mowse Score:

Protein score is  $-10 \cdot \log(P)$ , where P is the probability that the observed match is a random event. Protein scores greater than 73 are significant ( $p < 0.05$ ).

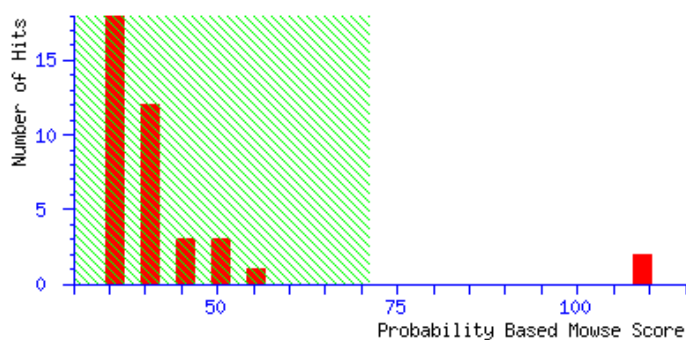

Matched peptide sequences: shown in **Bold Red**:

```
1  MAISSSTSGT  SSSLPSRTTV  MLLLFFFTAS  VGITDAQVGV  CYGMQGNLNP
51  PVSEVIALYK  KSNITRMRIY  DPNQAVLEAL  RGSNIELILG  VPNSDLQSLT
101 NPSNAKSWVQ  KNVRGFWSSV  RFRYIAVGNE  ISPVNRGTAW  LAQFVLPAMR
151 NIHDAIRSAG  LQDQIKVSTA  IDLTLVGNSY  PPSAGAFRDD  VRSYLNPIIR
201 FLSSIRSPLL  ANIYPYFTYA  GNPRDISLPY  ALFTSPSVVV  WDGQRGYKNL
251 FDATLDALYS  ALERASGGSL  EVVSESGWP  SAGAFATFD  NGRTYLSNLI
301 QHVKRGTPKR  PKRAIETYLE  AMFDENKKQP  EVEKHGGLFF  PNKWQKYNLN
351 FSAEKNWDIS  TEHNATILFL  KSDM
```

Spot No.: **30**

NCBI accession No.: **gi|255540341** Species: *Ricinus communis*

Protein name: **glyceraldehyde 3-phosphate dehydrogenase, putative**

Mascot score: **86**

Sequence coverage %:**42**

Matched peptides No.: **14**

Total peptides No.: **57**

Calculated Mr: **36930**

Calculated pI: **7.10**

Probability Based Mowse Score:

Protein score is  $-10 \cdot \log(P)$ , where P is the probability that the observed match is a random event. Protein scores greater than 73 are significant ( $p < 0.05$ ).

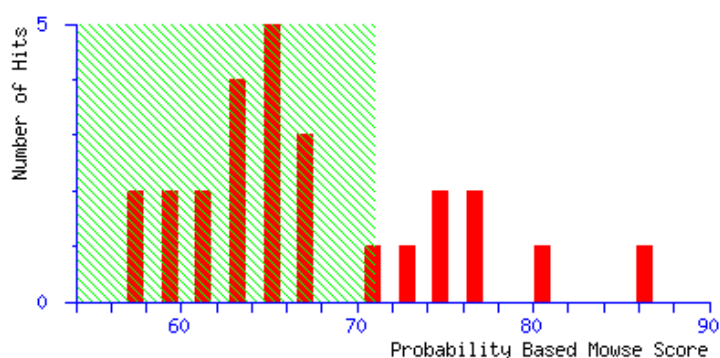

Matched peptide sequences: shown in **Bold Red**:

1 **MAKIKIGING** **FGRIGRLVAR** **VALQRDDVEL** VAVNDPFIST EYMTYMFKYD  
51 **TVHGQWKHHE** LKIKDDKILL FGEKPVTVFG VRNPEEIPWA **ETGAEYIVES**  
101 **TGVFTDKDKA** AAHLKGGAKK VIISAPSKDA **PMFVVGVNEK** EYTPDLHIIS  
151 NASCTTNCLA PLAKVINDRF GIVEGLMTTV HSITATQKTV **DGPSMKDWRG**  
201 **GRAASFNIIP** **SSTGAAKAVG** **KVLPSLNGKL** **TGMSFRVPTV** **DVSVDLTVR**  
251 LEKSATYEQI **KAAIKEESEG** **KLKGILGYTE** DDVVSTDFIG DKRSSIFDAK  
301 **AGIALNDKQV** **KLVSWYDNEW** **GYSTRVVDLI** VHVASVH

Spot No.: **31**

NCBI accession No.: **gi|4539543** Species: *Nicotiana tabacum*

Protein name: **glyceraldehyde-3-phosphate dehydrogenase**

Mascot score: **121**

Sequence coverage %:**47**

Matched peptides No.: **19**

Total peptides No.: **89**

Calculated Mr: **36816**

Calculated pI: **7.70**

Probability Based Mowse Score:

Protein score is  $-10 \cdot \log(P)$ , where P is the probability that the observed match is a random event. Protein scores greater than 73 are significant ( $p < 0.05$ ).

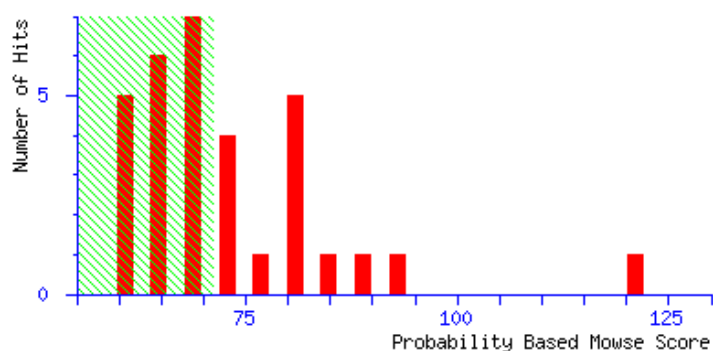

Matched peptide sequences: shown in **Bold Red**:

1 **MAVKIGING** **FGRIGRLVAR** **VALQRDDVEL** VAVNDPFISV EYMTYMFKYD  
51 SVHGQWKHHE **LKVKDDKTL** **FGEKAVTVFG** FRNPEEIPWG QTGADYIVES  
101 TGVFTDKDKA **AAHLKGGAKK** **VIISAPSKDA** **PMFVVGVNEK** EYKPELNIVS  
151 NASCTTNCLA **PLAKVINDRF** **GIVEGLMTTV** **HSITATQKTV** DGPSAKDWRG  
201 **GRAASFNIIP** **SSTGAAKAVG** **KVLPALNGKL** **TGMAFRVPTV** **DVSVDLTVR**  
251 **LEKEATYDEI** **KAAIKEESEG** **KLKGILGYTE** **DDVVSTDFVG** **DNRSSIFDAK**  
301 **AGIALSKNFV** **KLVSWDNEW** **GYSTRVVDLI** **KHMASVQ**



Spot No.: **32**

NCBI accession No.: **gi|32527831**

Species: *Populus tremula x Populus tremuloides*

Protein name: **UDP-glucose pyrophosphorylase**

Mascot score: **99**

Sequence coverage %: **40**

Matched peptides No.: **18**

Total peptides No.: **102**

Calculated Mr: **51949**

Calculated pI: **5.68**

Probability Based Mowse Score:

Protein score is  $-10 \cdot \log(P)$ , where P is the probability that the observed match is a random event. Protein scores greater than 73 are significant ( $p < 0.05$ ).

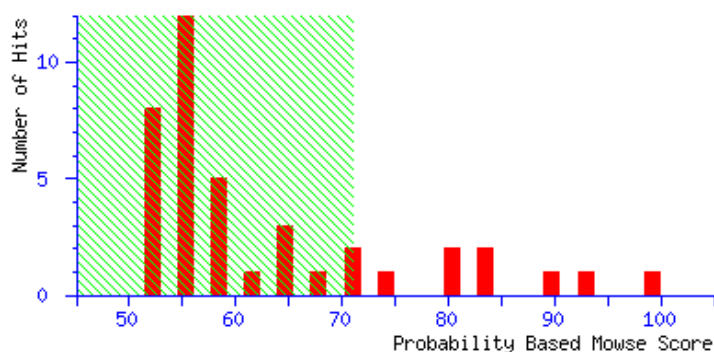

Matched peptide sequences: shown in **Bold Red**:

```
1  MATDTEKISQ  LKSAVANLNQ  ISESEKTGFV  NLVSRYLSGE  AQQVEWSKIQ
51  TPTDEVVVPY  DTLESTPEDP  EETKMLLDKL  VVLKLNGGLG  TTMGCTGPKS
101 VIEVRNGLTF  LDLIVIQIES  LNKKYGCSVP  LLLMNSFNTH  DDTQKIIEKY
151  SNSNIEIHTF  NQSQYPRLVA  DDFVPLPSKG  HTDKDGWYPP  GHGDVFPSLK
201  NSGKLDALLS  QGKEYVVFAN  SDNLGAVVDL  KILNHLIRNK  NEYCMEVTPK
251  TLADVKGGTL  ISYEGKVQLL  EIAQVPDQHV  NEFKSIEKFK  IFNTNNLWVN
301  LKAIKRLVEA  DALKMEIIPN  PKEVDGVKVL  QLETAAGAAI  RFFDHAIGIN
351  VPRSRFLPVK  ASSDLLLVQS  DIYTPVVDGF  VIRNPGRANP  ANPSIELGPE
401  FKKVASFLSR  FKSIPSIIEL  DSLKVAGDVW  FGVNVTLK GK  VSIVVKSGVK
451  LEIPEGVVLE  NKEINGPKDL
```



Spot No.: **33**

NCBI accession No.: **gi|6707018** Species: *Hevea brasiliensis*

Protein name: latex protein allergen Hev b 7

Mascot score: **171**

Sequence coverage %:**79**

Matched peptides No.: **26**

Total peptides No.: **67**

Calculated Mr: **43107**

Calculated pI: **5.00**

Probability Based Mowse Score:

Protein score is  $-10 \cdot \log(P)$ , where P is the probability that the observed match is a random event. Protein scores greater than 73 are significant ( $p < 0.05$ ).

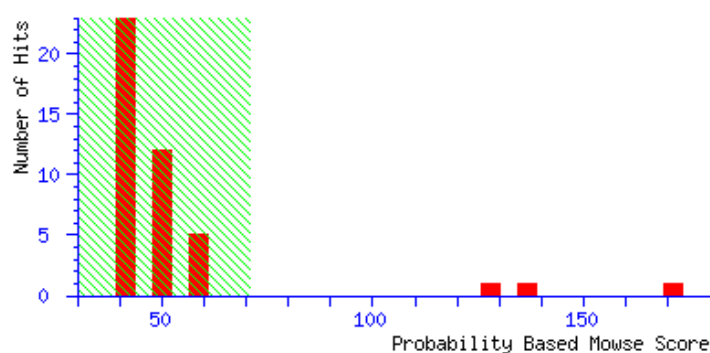

Matched peptide sequences: shown in **Bold Red**:

```
1  MATGSTPLTQ GKKITVLSID GGGIRGIIPG IILASLESKL QDLGPDARI
51 ADYFDIIAGT STGGLITTML TAPNEDKKPM YQARDIKDFY LENCPKIFPK
101 ESRDNYDPIH SIGPIYDGEY LRELCNNLLK DLTVKDTLTD VIIPTFDIKL
151 LLPVIFSSDD AKCNALKNAR LADVCISTSA APVLLPAHSF TTEDDKNIHT
201 FELIDGGVAA TNPTLLALTH IRNEIIRQNP RFIGANLTES KSRLVLSLGT
251 GKSEYKEKYN ADMTSKWRLY NWALYNGNSP AVDIFSNASS DMVDFHLSAL
301 FKSLDCEDYY LRIQDDTLTG EESSGHIATE ENLQRLVEIG TELLEKQESR
351 INLDTGRLES IPGAPTNEAA IAKFAKLLSE ERKLRQLK
```

Spot No.: **34**

NCBI accession No.: **gi|158144895** Species: *Gossypium hirsutum*

Protein name: **enolase**

Mascot score: **123**

Sequence coverage %: **39**

Matched peptides No.: **14**

Total peptides No.: **48**

Calculated Mr: **47982**

Calculated pl: **5.49**

Probability Based Mowse Score:

Protein score is  $-10 \cdot \log(P)$ , where P is the probability that the observed match is a random event. Protein scores greater than 73 are significant ( $p < 0.05$ ).

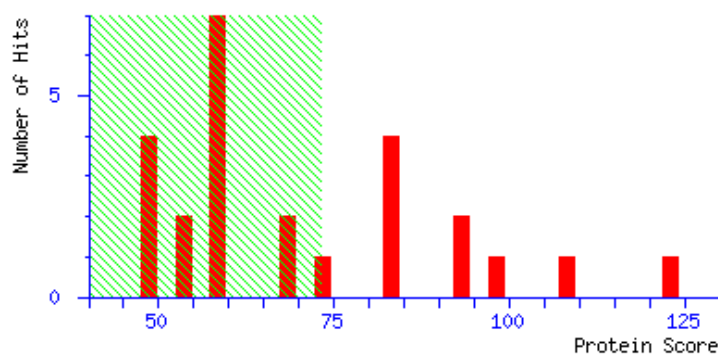

Matched peptide sequences: shown in **Bold Red**:

```
1 MAATIVSVKA RQIFDSRGNP TVEVDVETSN GIKARAAVPS GASTGIYEAL
51 ELRDGDFDYL GKGVSKAVAN VNTIIGPALI GKDPTEQTAI DNFMVQQLDG
101 TQNEWGWCKQ KLGANAILAV SLAVCKAGAE VKKLPLYKHI ANLAGNSKLV
151 LPVPAFNVIN GGSHAGNKLA MQEFMILPVG ASSFKEAMKM GVEVYHHLKS
201 VIKKKYGQDA TNVGDEGGFA PNIQENKEGL ELLNTAIAKA GYTGKVVIGM
251 DVAASEFYGT DKTYDLNFKE ENNDGKQKIS GDALKDLYKS FVAEYPIVSI
301 EDPFDQDDWE HYSKLTNEIG EKVQIVGDDL LVTNPKRVAK AIAEKTNAL
351 LLKVNQIGSV TESIEAVKMS KQAGWGMAS HRSGETEDTF IADLSVGLAT
401 GQIKTGAPCR SERLAKYNQL LRIEEEELGAE AVYAGASFRA FVAPY
```

Spot No.: 35

NCBI accession No.: [gi|3288200](#) Species: *Hevea brasiliensis*

PFF score: [81]

Protein name: **latex allergen**

Matched peptides No.: [2] Sequence coverage %: [4]

Matched sequences: **R.DTYDPIHSIGPIYDGEYLR.E;**

**R.DTYDPIHSIGPIYDGEYLR.E**

Calculated Mr: **43020**

Calculated pI: **5.00**

Probability Based Mowse Score:

Ions score is  $-10 \cdot \log(P)$ , where P is the probability that the observed match is a random event.

Individual ions scores  $> 43$  indicate identity or extensive homology ( $p < 0.05$ ).

Protein scores are derived from ions scores as a non-probabilistic basis for ranking protein hits.

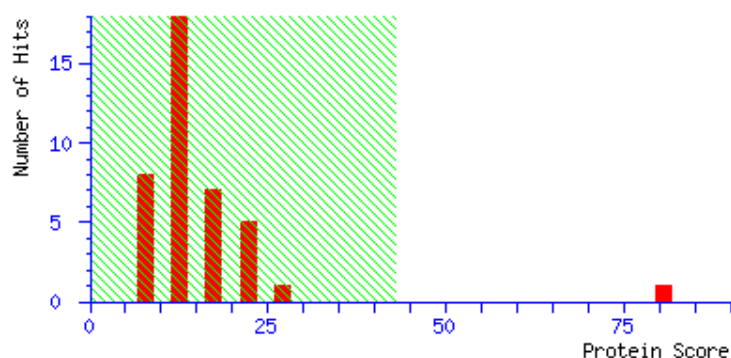

Matched peptide sequences: shown in **Bold Red**:

```
1  MATGSTTLTQ  GKKITVLSID  GGGIRGIIPG  IILASLESKL  QDLGPDARI
51  ADYFDIIAGT  STGGLITTML  TAPNEDKKPI  YQAKDIKDFY  LENCPKIFPK
101 ESRDTYDPIH SIGPIYDGEY LRELCNLLK  DLTVKDTLTD  VIIPAFDIKL
151  LLPVIFSSDD  AKCNALKNAR  LADVCISTSA  APVLLPAHSF  TTEDDKNIHT
201  FELIDGGVAA  ANPTLLALH  IRNEIIRQNP  RFIGANLTES  KSRLVLSLGT
251  GKSEYKEKYN  ADMTSKWRLY  NWALYNGNSP  AVDIFSNASS  DMVDFHLSAL
301  FKSLDCEDYY  LRIQDDTLTG  EESSGHIATE  ENLQRLVEIG  TELLEKQESR
351  INLDTGRLES  IPGAPTNEAA  IAKFAKLLSE  ERKLRQLK
```

Spot No.: 36

NCBI accession No.: [gi|1916805](#) Species: *Hevea brasiliensis*

PFF score: [138]

Protein name: **latex patatin homolog**

Matched peptides No.: [2] Sequence coverage %: [8]

Matched sequences: **K.SLDCEDYYLR.I;**

**R.IQDDTLTGEESSGHIAATEENLQR.L**

Calculated Mr: **43035**

Calculated pI: **5.00**

Probability Based Mowse Score:

Ions score is  $-10 \cdot \log(P)$ , where P is the probability that the observed match is a random event.

Individual ions scores  $> 44$  indicate identity or extensive homology ( $p < 0.05$ ).

Protein scores are derived from ions scores as a non-probabilistic basis for ranking protein hits.

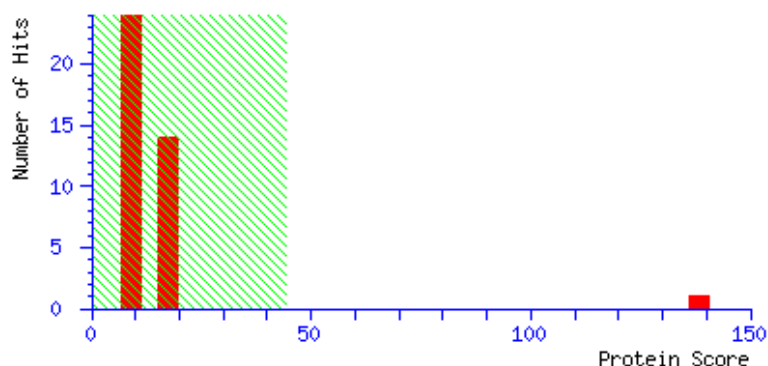

Matched peptide sequences: shown in **Bold Red**:

```
1 MATGSTTLTQ GKKITVLSID GGGIRGIIPG IILASLESKL QDLGPDARI
51 ADYFDIIAGT STGGLITTML TAPNEDKKPM YQAKDIKDFY LENCPIKIFPK
101 ESRDNYDPIH SIGPIYDGEY LRELCNNLLK DLTVKDTSTD VIIPTFDIKL
151 LLPVIFPSDD AKCNALKNAR LADVCIESTA APVLLPAHSF TTEDDKNIHT
201 FELIDGGVAA TNPTLLALTH IRNEIIRQNP RFIGANLTES KSRLVLSLGT
251 GKSEYKEKYN ADMTSKWRLY NWALYNGNSP AVDIFSNASS DMVDSHLSAL
301 FKSLDCEDYY LRIQDDTLTG EESSGHIAE ENLQRLVEIG TELLEKQESR
351 INLDTGRLES IPGAPTNEAA IAKFAKLLSE ERKLRQLK
```

Spot No.: 37

NCBI accession No.: [gi|41581137](#) Species: *Hevea brasiliensis*

Protein name: **putative latex allergen hev b 7.02**

PMF score: **152**

Sequence coverage %: **44**

Matched peptides No.: **16**

Total peptides No.: **39**

Calculated Mr: **43027**

Calculated pI: **5.12**

Probability Based Mowse Score:

Protein score is  $-10 \cdot \log(P)$ , where P is the probability that the observed match is a random event. Protein scores greater than 73 are significant ( $p < 0.05$ ).

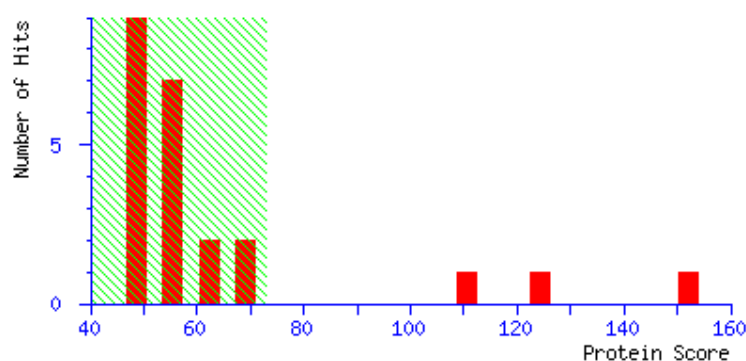

Matched peptide sequences: shown in **Bold Red**

```
1  ATGSTTLTQG  KKITVLSIDG  GGIRGIIPGI  ILASLESKLQ  DLDGPDARIA
51  DYFDIIAGTS  TGGLITTMLT  APNEDKKPMY  QAKDIKDFYL  ENCPKIFPKE
101 SRDNYDPIHS  IGPIYDGEYL  RELCNLLKD  LTVKDTLTDV  IIPTFDIKLL
151 LPVIFSSDDA  KCNALKNARL  ADVCISTSAA  PVLLPAHSFT  TEDDKNIHTF
201 ELIDGGVAAT  NPTLLALTHI  RNEIIRQNPR  FIGANLTESK  SRLVLSLGTG
251 KSEYKEKYNA  DMTSKWRLYN  WALYNGNSPA  VDIFSNASSD  MVDFHLSALF
301 KSLDCEDYYL  RIQDDTLTGE  ESSGHIATEE  NLQRLVEIGT  RLEKQESRI
351 NLDTGRLESI  PGASTNEAAI  TKFAKLLSEE  RKLRQLK
```

Spot No.: 38

NCBI accession No.: [gi|41581137](#) Species: *Hevea brasiliensis*

Protein name: **putative latex allergen hev b 7.02**

PMF score: 142

Sequence coverage %: 42

Matched peptides No.: 15

Total peptides No.: 51

Calculated Mr: 43027

Calculated pI: 5.12

Probability Based Mowse Score:

Protein score is  $-10 \cdot \log(P)$ , where P is the probability that the observed match is a random event. Protein scores greater than 73 are significant ( $p < 0.05$ ).

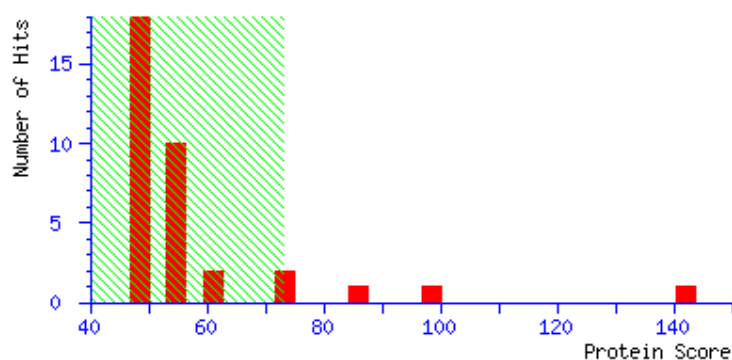

Matched peptide sequences: shown in **Bold Red**

```
1  ATGSTTLTQG  KKITVLSIDG  GGIRGIIPGI  ILASLESKLQ  DLDGPDARIA
51  DYFDIIAGTS  TGGLITTMLT  APNEDKKPMY  QAKDIKDFYL  ENCPKIFPKE
101 SRDNYDPIHS  IGPIYDGEYL  RELCNNLLKD  LTVKDTLTDV  IIPTFDIKLL
151 LPVIFSSDDA  KCNALKNARL  ADVCISTSAA  FVLLPAHSFT  TEDDKNIHTF
201 ELIDGGVAAT  NPTLLALTHI  RNEIIRQNPR  FIGANLTESK  SRLVLSLGTG
251 KSEYKEKYNA  DMTSKWRLYN  WALYNGNSPA  VDIFSNASSD  MVDFHLSALF
301 KSLDCEDYYL  RIQDDTLTGE  ESSGHIATEE  NLQRLVEIGT  RLLEKQESRI
351 NLDTGRLESI  PGASTNEAAI  TKFAKLLSEE  RKLRQLK
```

Spot No.: 39

NCBI accession No.: [gi|255556934](#) Species: *Ricinus communis*

Protein name: **Transitional endoplasmic reticulum ATPase, putative**

PMF score: **136**

Sequence coverage %: **31**

Matched peptides No.: **25**

Total peptides No.: **59**

Calculated Mr: **90355**

Calculated pI: **5.13**

Probability Based Mowse Score:

Protein score is  $-10 \cdot \log(P)$ , where P is the probability that the observed match is a random event. Protein scores greater than 73 are significant ( $p < 0.05$ ).

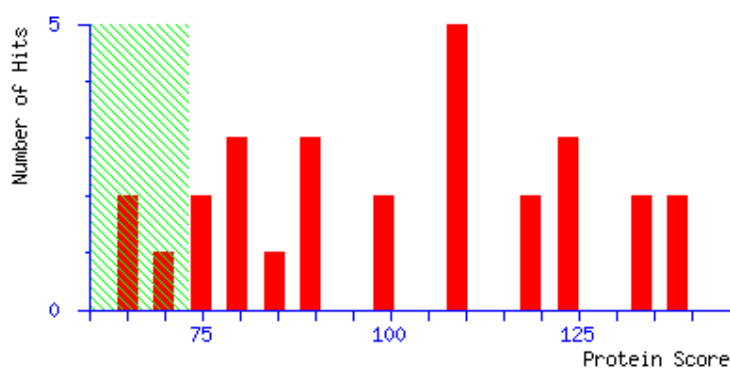

Matched peptide sequences: shown in **Bold Red**

1 MSNQAESSDS KGTKRDFSTA ILERKKSPNR LVVDEAINDD NSVVS LHPET  
51 MEKLQLFRGD TILIKGKKRK DTICIALADD SCDEPKIRMN KVVRSNLRVR  
101 LGDVVSVHQ C PDVKYGKRVH ILPIDDTIEG VTGNLFDAYL KPYFLEAYRP  
151 VRKGD LFLVR GGMRSVEFKV IETDPAEYCV VAPDTEIFCE GEPVRE DEN  
201 RLDEVG YDDV GGVRKQMAQI RELVELPLRH PQLFKSIGVK PPKGILLYGP  
251 PGSGKTLIAR AVANETGAFF FCINGPEIMS KLAGES ESNL RKA FEEAEKN  
301 APSIIFIDEI DSIAPKREKT HGEVERRIVS QLLT LMDGLK SRAHVIVIGA  
351 TNRPN SIDPA LRRFGRFDRE IDIGVPDEVG RLEVLRIHTK NMKLAEDVDL  
401 ERISKDTHGY VGADLAALCT EAALQCIREK MDVIDLEDET IDAEILNSMA  
451 VSNEHFQTAL GTSNPSALRE TVVEVPNVSW EDIGLENVK RELQETVQYP  
501 VEHPEKFEKF GMSPSKGVLF YGPPGCGKTL LAKAIANECQ ANFISVKGPE  
551 LLTMWFG ESE ANVREIFDKA RQSAPCVLFF DELDSIATQR GSSVGDAGGA  
601 ADRV LNQLLT EMDGMSAKKT VFIIGATNRP DIIDPALLRP GR LDQLIYIP  
651 LPDEDSRHQI FKACLRKSPV SKDVDLRALA KYTQGFSGAD ITEICQRACK  
701 YAIRENIEKD IERERRRRDN PEAMEEDVED DVAEIKAAHF EESMKYARRS  
751 VSDADIRKYQ AFAQILQQSR GFGSEFRFSE ATGAAAGADP FAASAGGEAD  
801 DDDLYS



Spot No.: 40

NCBI accession No.: [gi|149938964](#)

Species: *Actinidia deliciosa*

Protein name: **ACT1**

PMF score: **125**

Sequence coverage %: **57**

Matched peptides No.: **19**

Total peptides No.: **56**

Calculated Mr: **41865**

Calculated pI: **5.31**

Probability Based Mowse Score:

Protein score is  $-10 \cdot \log(P)$ , where P is the probability that the observed match is a random event. Protein scores greater than 73 are significant ( $p < 0.05$ ).

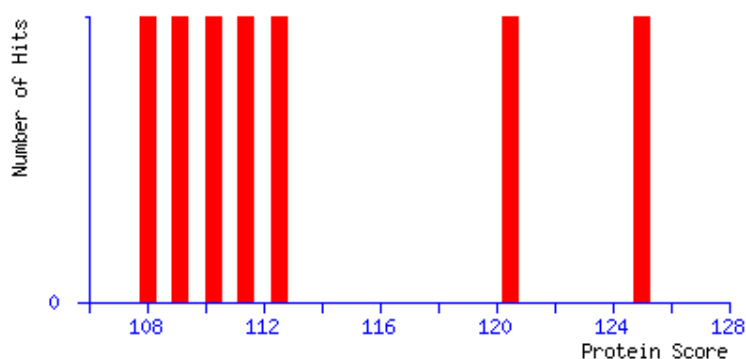

Matched peptide sequences: shown in **Bold Red**

```
1  MADAEDIQPL VCDNGTGMVK AGFAGDDAPR AVFPSIVGRP RHTGVMVGMG
51  QKDAYVGD EA QSKRGILT LK YPIEHGIVSN WDDMEKIWHH TFYNELRVAP
101 EEHPVLLTEA PLNPKANREK MTQIMFETFN VPAMYVAIQ A VLSLYASGRT
151 TGIVLDSDG D VSHTVPIYEG YALPHAILRL DLAGRDLTDA LMKILTERGY
201 MFTTTAEREI VRDVKEKLAY VALDYEQELE TAKSSSSVEK NYELPDGQVI
251 TIGAERFRCP EVLFQPSLIG MEAAGIHETT YNSIMKCDVD IRKDLYGNIV
301 LSGGSTMFPG IADRMSKEIT ALAPSSMKIK VVAPPERKYS VWIGGSILAS
351 LSTFQQMWIS KGEYDESGPS IVHRKCF
```

Spot No.: 41

NCBI accession No.: [gi|159489771](#)

Species: *Chlamydomonas reinhardtii*

Protein name: **predicted protein**

**PMF** score: **83**

Sequence coverage %: **37**

Matched peptides No.: **13**

Total peptides No.: **42**

Calculated Mr: **41375**

Calculated *pI*: **9.34**

Probability Based Mowse Score:

Protein score is  $-10 \cdot \log(P)$ , where *P* is the probability that the observed match is a random event. Protein scores greater than 73 are significant ( $p < 0.05$ ).

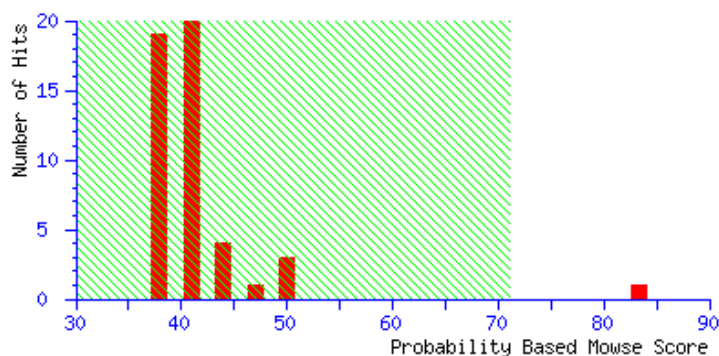

Matched peptide sequences: shown in **Bold Red**

```
1  SGAAFIKWGQ  WAATRVDLFP  DDFCDTLANL  HDRAPTHSFA  FTRKQVERSF
51  GLALERMFES  FEQQPVASGS  IAQIHRAVMR  GSDGSRLQVA  VKVVHPRVAL
101 RIRQDFALLR  PAAAALGRLR  SLRSLSLPET  VSQFSATMTA  QADLRVEAAH
151 LRRFYANFAA  VAAHVTTPRP  LPGLVRPEVM  VETWEDGRSV  SHYIRYPHPS
201 LNGRVVCLGL  DTYLKMLLQD  NFVHTDLHPG  NIMVRANRSS  RSSCRRAGVQ
251 LVLLDFGLAE  ELSPVVRHHF  ISFLQHLLRG  DGVAAAGHLL  RWTSRRQACA
301 DPAALTADMV  ALAATQCDLR  SEEGIDLDKV  MKDVLRLLARK  HGVTIDSCYA
351 ALVIAVCVIV  GFATSLDPGV  NL
```

Spot No.: 42

NCBI accession No.: [gi|14423688](#)

Species: *Hevea brasiliensis*

Protein name: **Enolase 1; AltName: Full=2-phospho-D-glycerate hydro-lyase 1; AltName: Full=2-phosphoglycerate dehydratase 1; AltName: Allergen=Hev b 9**

**PMF** score: **97**

Sequence coverage %: **39**

Matched peptides No.: **14**

Total peptides No.: **24**

Calculated Mr: **48029**

Calculated pI: **5.57**

Probability Based Mowse Score:

Protein score is  $-10 \cdot \log(P)$ , where P is the probability that the observed match is a random event. Protein scores greater than 73 are significant ( $p < 0.05$ ).

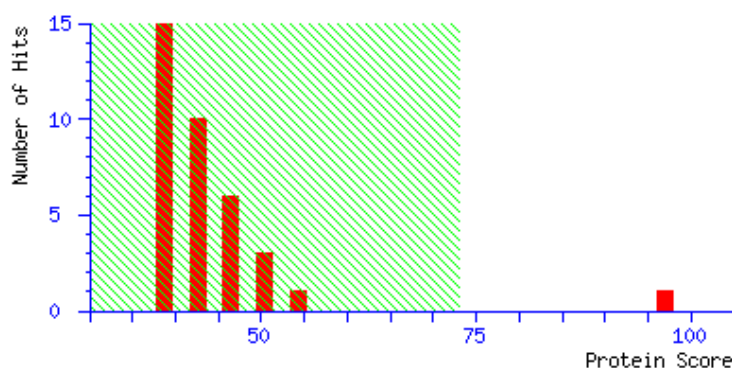

Matched peptide sequences: shown in **Bold Red**

```
1  MAITIVSVRA  RQIFDSRGNP  TVEADVKLSD  GYLARAAVPS  GASTGIYEAL
51 ELRDGGSDYL  GKGVSKAVEN  VNIIIGPALV  GKDPTDQVGI  DNFMVQQLDG
101 TVNEWGWCKQ  KLGANAILAV  SLAVCKAGAH  VKGIPLYEHI  ANLAGNKNLV
151 LPVPAFNVIN  GGSHAGNKLA  MQEFMILPVG  ASSFKEAMKM  GAEVYHHLKS
201 VIKKKYGQDA  TNVGDEGGFA  PNIQENKEGL  ELLKTAIAKA  GYTGKVVIGM
251 DVAASEFYGS  DQTYDLNFKE  ENNNGSQKIS  GEALKDLYKS  FVAEYPIVSI
301 EDPFDQDDWA  HYAKLTSEIG  EKVQIVGDDL  LVTNPKRVEK  AIKEKACNAL
351 LLKVNQIGSV  TESIEAVRMS  KRAGWVMAS  HRSGETEDTF  IADLSVGLAT
401 GQIKTGAPCR  SERLAKYNQL  LRIEEELGSE  AVYAGANFRK  PVEPY
```

Spot No.: 44

NCBI accession No.: [gi|382929047](#) Species: *Hypselodelphys hirsuta*

Protein name: maturase K (chloroplast)

PMF score: 82

Sequence coverage %: 28

Matched peptides No.: 15

Total peptides No.: 41

Calculated Mr: 62643

Calculated pI: 9.61

Probability Based Mowse Score:

Protein score is  $-10 \cdot \log(P)$ , where P is the probability that the observed match is a random event. Protein scores greater than 73 are significant ( $p < 0.05$ ).

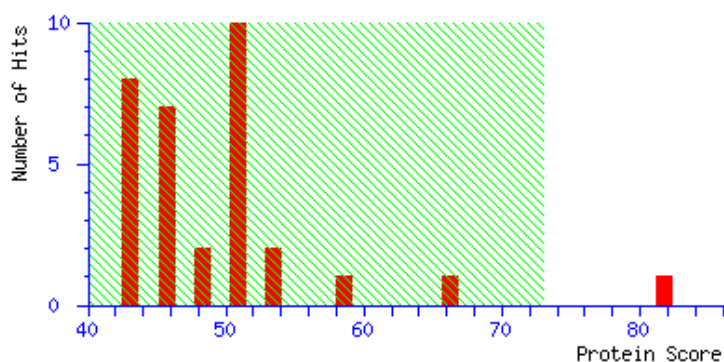

Matched peptide sequences: shown in **Bold Red**

```
1  MEELQRYLEK DRSRQQHFLY PLLFQEYIYV FAYDHGLTSS IFYESVKLKS
51  LGYDNKSSSI LVKRLIIRMY QQNFLIYSVI YSVNDSYQNR FVRHNNYFYS
101 HFFSQMISEG FAVIVEIPFS LQLVSSLEEK EIPKSHNLQS IHSVFPFLED
151 KLLHLNLYSD ILIPHFIHIE ILVQILKSWI QDVPSLHLLR FFLHEDYNWN
201 NLITPKKSIY VFSKENKRIF WVLVNSYLSE CEFVFIFLRK QSSYLRLTSS
251 GVFLERTYFY GKIEHLLVCR IFFQKTLWVF KDPFMHYVRY QGKAILGSRG
301 THSLMKKWKY YLVNFWQYHF HFWSQSCRIH INQLSKYSFY FLGYLSSVLI
351 NSLAVRNQML ENSFLMETLT RKFDTIIPRI PLIRSLFKAK FCTVSGHPIS
401 KPIWTDLSDC DIINRFGRVC RNLSHYHSGS SKKQSLYRMK YILRLSCART
451 LARKHKSTVR SFLQRLSSGL LEEFFTEEQ VLSLIFPKIT FFSLYRSSRE
501 RIWYLDIIRI NDLVNNL
```

Spot No.: 45

NCBI accession No.: [gi|4469175](#) Species: *Hevea brasiliensis*

Protein name: beta-1,3-glucanase

PMF score: 156

Sequence coverage %: 55

Matched peptides No.: 19

Total peptides No.: 37

Calculated Mr: 38930

Calculated pI: 9.45

Probability Based Mowse Score:

Protein score is  $-10 \cdot \log(P)$ , where P is the probability that the observed match is a random event. Protein scores greater than 73 are significant ( $p < 0.05$ ).

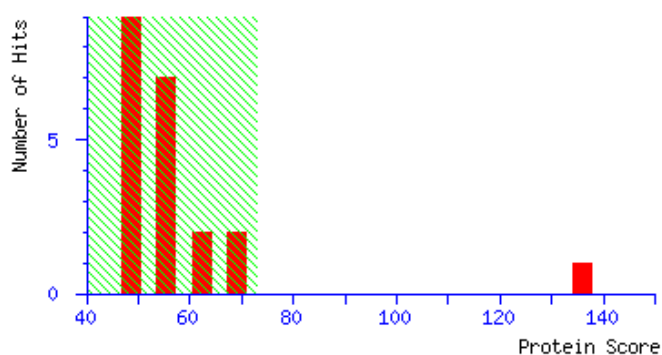

Matched peptide sequences: shown in **Bold Red**

```
1  MAISSSTSGT  SSSLPSRTTV  MLLFFFAAS  VGITDAQVGV  CYGMQGNLNP
51  PVSEVIALYK  KSNITRMRIY  DPNRAVLEAL  RGSNIELILG  VPNSDLQSLT
101 NPSNAKSWVQ  KNVRGFWSSV  LFRYIavgNE  ISPVNRGTAW  LAQFVLPAMR
151 NIHDAIRSAG  LQDQIKVSTA  IDLTLVGNSY  PPSAGAFRDD  VRSYLNPIIR
201 FLSSIRSPLL  ANIYPYFTYA  GNPRDISLPY  ALFTSPSVVV  WDGQRGYKNL
251 FdatLDVLYS  ALERASGGSL  EVVVESEGWP  SAGAFaatFD  NGRtyLSNLI
301 QHVkRGTPKR  PNRAIETyLF  AMFDENkkQP  EVEKqFGLFF  PDKWqKYnLN
351 FG
```

Spot No.: 46

NCBI accession No.: [gi|4469175](#) Species: *Hevea brasiliensis*

Protein name: beta-1,3-glucanase

PMF score: 126

Sequence coverage %: 55

Matched peptides No.: 19

Total peptides No.: 37

Calculated Mr: 38930

Calculated pI: 9.45

Probability Based Mowse Score:

Protein score is  $-10 \cdot \log(P)$ , where P is the probability that the observed match is a random event. Protein scores greater than 73 are significant ( $p < 0.05$ ).

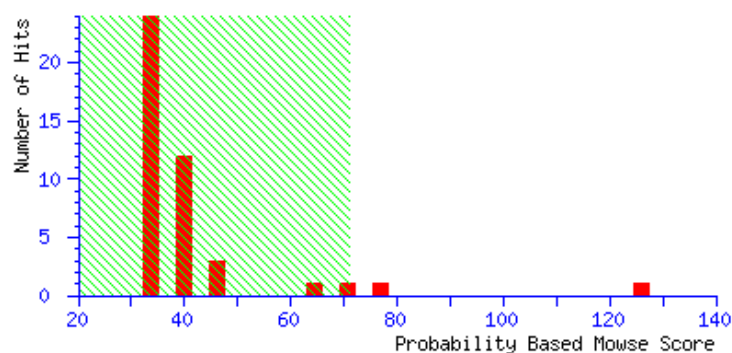

Matched peptide sequences: shown in **Bold Red**

```
1  MAISSSTSGT  SSSLPSRTTV  MLLFFFAAS  VGITDAQVGV  CYGMQGNLNP
51  PVSEVIALYK  KSNITRMRIY  DPNRAVLEAL  RGSNIELILG  VPNSDLQSLT
101 NPSNAKSWVQ  KNVRGFWSSV  LFRYIAVGNE  ISPVNRGTAW  LAQFVLPAMR
151 NIHDAIRSAG  LQDQIKVSTA  IDLTLVGNSY  PPSAGAFRDD  VRSYLNPIIR
201 FLSSIRSPLL  ANIYPYFTYA  GNPRDISLPY  ALFTSPSVVV  WDGQRGYKNL
251 FDATELDVLYS  ALERASGGSL  EVVVSESGWP  SAGAFATFD  NGRTYLSNLI
301 QHVKRGTPKR  PNRAIETYLE  AMFDENKKQP  EVEKQFGLFF  PDKWQKYNLN
351  FG
```

Spot No.: 47

NCBI accession No.: [gi|225438145](#)

Species: *Vitis vinifera*

PFF score: [65]

Protein name: PREDICTED: malate dehydrogenase, cytoplasmic

Matched peptides No.: [1]

Sequence coverage %: [3]

Matched sequences: [K.IVQGLHIDEFSR.K](#)

Calculated Mr: 35881

Calculated pI: 6.18

Probability Based Mowse Score:

Ions score is  $-10 \cdot \log(P)$ , where P is the probability that the observed match is a random event.

Individual ions scores  $> 44$  indicate identity or extensive homology ( $p < 0.05$ ).

Protein scores are derived from ions scores as a non-probabilistic basis for ranking protein hits.

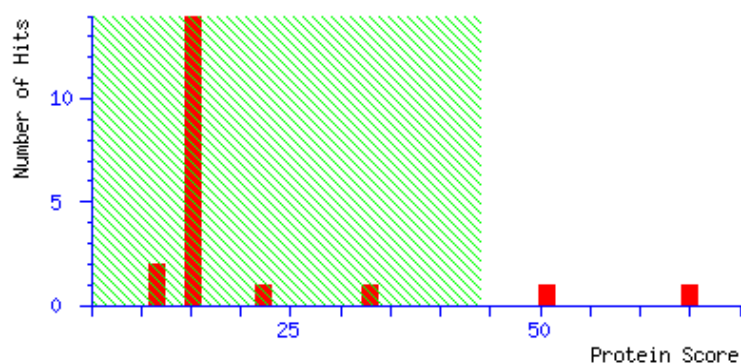

Matched peptide sequences: shown in **Bold Red**:

```
1 MAKEPVRVLV TGAAGQIGYA LVPMIARGVM LGADQPVILH MLDIPPAAEA
51 LNGVKMELVD AAFPLLKGVV ATTDVVEACT GVNIAVMVGG FPRKEGMERK
101 DVMSKNVSIY KSQASALENH AAANCKVLVV ANPANTNALI LKEFAPSIPE
151 KNISCLTRLD HNRALGQVSE RLNVQVSDVK NVIIWGNHSS TQYPDVNHAT
201 VKTPAGEKPV RGLVGDDAWL NGEFITTQQQ RGAAIKARK LSSALSAASA
251 ACDHIRDWVL GTPEGTWVSM GVYSDGSYNV PAGLIYSFPV TCCAGEWKIV
301 QGLHIDEFSR KKLDLTAQEL SEEKELAYSC LS
```



Spot No.: 48

NCBI accession No.: [gi|225438145](#) Species: *Vitis vinifera*

PFF score: [85]

Protein name: PREDICTED: malate dehydrogenase, cytoplasmic

Matched peptides No.: [1] Sequence coverage %: [3]

Matched sequences: [K.IVQGLHIDEFSR.K](#)

Calculated Mr: 35881

Calculated pI: 6.18

Probability Based Mowse Score:

Ions score is  $-10 \cdot \log(P)$ , where P is the probability that the observed match is a random event.

Individual ions scores > 44 indicate identity or extensive homology ( $p < 0.05$ ).

Protein scores are derived from ions scores as a non-probabilistic basis for ranking protein hits.

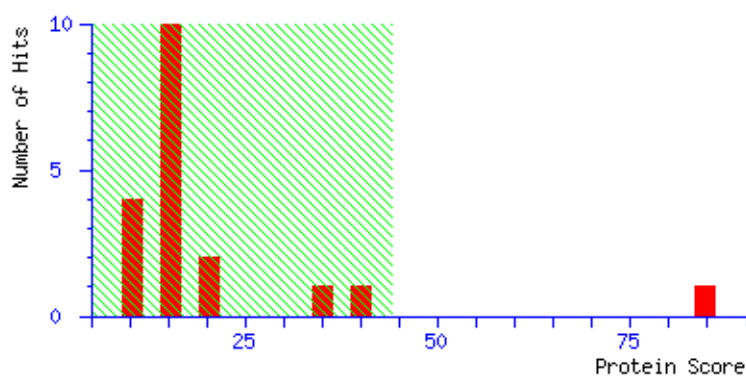

Matched peptide sequences: shown in **Bold Red**:

```
1 MAKEPVRVLV TGAAGQIGYA LVPMIARGVM LGADQPVILH MLDIPPAAEA
51 LNGVKMELVD AAFPLLKGVV ATTDVVEACT GVNIAMVGG FPRKEGMERK
101 DVMSKNVSIY KSQASALENH AAANCKVLVV ANPANTNALI LKEFAPSIPE
151 KNISCLTRLD HNRALGQVSE RLNVQVSDVK NVIIWGNHSS TQYPDVNHAT
201 VKTPAGEKPV RGLVGDDAWL NGEFITTQQ RGAAIKARK LSSALSAASA
251 ACDHIRDWVL GTPEGTWVSM GVYSDGSYNV PAGLIYSFPV TCCAGEWKIV
301 QGLHIDEFSR KKLDLTAQEL SEEKELAYSC LS
```



Spot No.: 49

NCBI accession No.: [gi|255552291](#) Species: *Ricinus communis*

PFF score: [75]

Protein name: short chain dehydrogenase, putative

Matched peptides No.: [1] Sequence coverage %: [5]

Matched sequences: [K.DPIAIPTDVGFEEENCR.K](#)

Calculated Mr: 32148

Calculated pI: 6.50

Probability Based Mowse Score:

Ions score is  $-10 \cdot \log(P)$ , where P is the probability that the observed match is a random event.

Individual ions scores  $> 45$  indicate identity or extensive homology ( $p < 0.05$ ).

Protein scores are derived from ions scores as a non-probabilistic basis for ranking protein hits.

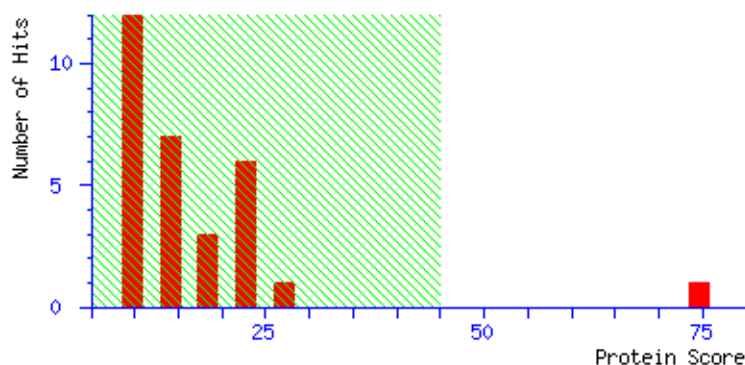

Matched peptide sequences: shown in **Bold Red**:

```
1  MATRRGYRFP  PQSQDKQPGK  EYLMHPLPEF  INPHYKPSNK  LQDKVALVTG
51  GDSGIGRAVS  YYFTLEGATV  AFTYVKGRED  KDKDHILKIL  HEVKAEGAKD
101 PIAIPDVGF EENCRKVIDQ  IMSEYGKIDI  LVNNAGEAHY  STTIEDITDP
151  MLERVFRTNI  FGHFFMSRHA  LKHMKEGGCI  INTASVAAYA  GFSFMVDYSS
201  TKGAVVAFTR  SLALQLIDRG  IRVNAVAPGS  VWTIPFQPSTL  SAEQVAQVGS
251  GVPMDRAAQP  YEIAPSFVFL  ASNDCSSYFT  GQVLHPNGMF
```

Spot No.: 50

NCBI accession No.: gi|29170601 Species: *Hevea brasiliensis*

PFF score: [240]

Protein name: small rubber particle protein

Matched peptides No.: [2] Sequence coverage %: [28]

Matched sequences: K.ENENFQQEANEQEEK.L;

K.DNSGPLKPGVETIEGVAK.T

Calculated Mr: 12769

Calculated pI: 4.61

Probability Based Mowse Score:

Ions score is  $-10 \cdot \log(P)$ , where P is the probability that the observed match is a random event.

Individual ions scores  $> 44$  indicate identity or extensive homology ( $p < 0.05$ ).

Protein scores are derived from ions scores as a non-probabilistic basis for ranking protein hits.

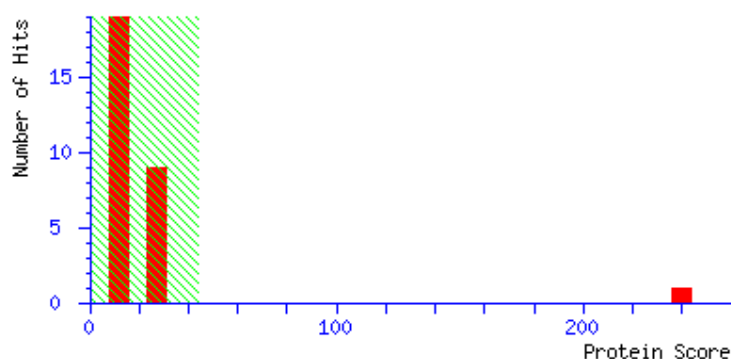

Matched peptide sequences: shown in **Bold Red**:

1 MAEG**KENENF** **QQEANEQEEK** LKYLEFVQAT TDNAVITALSN IYLYAK**DNSG**  
51 **PLKPGVETIE** **GVAKTVVIPA** SKIPTEAIKF ADRAVDASFT TLQNI~~VPSVL~~  
101 KQLPTQACDT SVKESAE

Spot No.: 51

NCBI accession No.: [gi|132270](#) Species: *Hevea brasiliensis*

Protein name: **Rubber elongation factor protein**

PMF score: **103**

Sequence coverage %: **78**

Matched peptides No.: **10**

Total peptides No.: **43**

Calculated Mr: **14713**

Calculated pI: **5.04**

Probability Based Mowse Score:

Protein score is  $-10 \cdot \log(P)$ , where P is the probability that the observed match is a random event. Protein scores greater than 73 are significant ( $p < 0.05$ ).

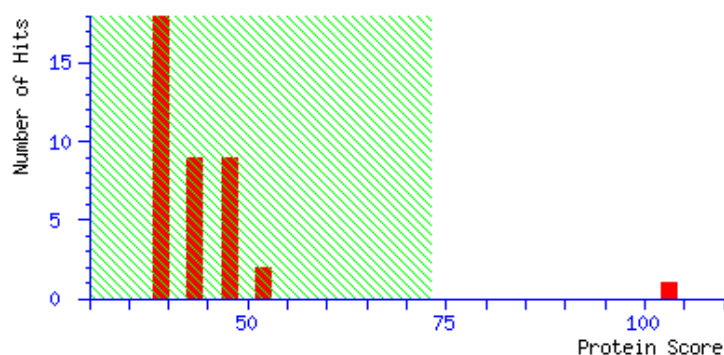

Matched peptide sequences: shown in **Bold Red**

1 MAEDEDNQQG QGEGCLKYLGF **VQDAATYAVT TFSNVYLFAK DKSGPLQPGV**  
51 **DIIEGPVKNV AVPLYNRFSY IPNGALKEVD STVVASVTII DRSLPPIVKD**  
101 **ASIQVVS AIR APEAARSLA SSLPGQTKIL AKV FYGEN**

Spot No.: 52

NCBI accession No.: [gi|132270](#) Species: *Hevea brasiliensis*

Protein name: **Rubber elongation factor protein**

PMF score: **115**

Sequence coverage %: **78**

Matched peptides No.: **10**

Total peptides No.: **33**

Calculated Mr: **14713**

Calculated pI: **5.04**

Probability Based Mowse Score:

Protein score is  $-10 \cdot \log(P)$ , where P is the probability that the observed match is a random event. Protein scores greater than 73 are significant ( $p < 0.05$ ).

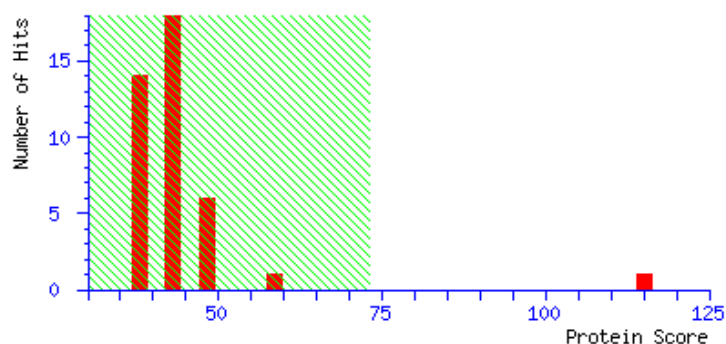

Matched peptide sequences: shown in **Bold Red**

1 MAEDEDNQQG QGEG**LKYLGF** VQDAATYAVT TFSNVYLFAK DKSGPLQPGV  
51 DIIEGPVKNV AVPLYNRFSY IPNGAL**KFVD** STVVASVTII DRSLPPIVKD  
101 ASI**QVVS**AIR AAPEAARSLA SSLPG**QTKIL** AKV**FYGEN**

Spot No.: 53

NCBI accession No.: [gi|115187464](#)

Species: *Arachis hypogaea*

PFF score: [61]

Protein name: **thioredoxin fold**

Matched peptides No.: [1]

Sequence coverage %: [4]

Matched sequences: [K.HVPGFIER.A](#)

Calculated Mr: 17525

Calculated pI: 5.57

Probability Based Mowse Score:

Ions score is  $-10 \cdot \log(P)$ , where P is the probability that the observed match is a random event. Individual ions scores > 44 indicate identity or extensive homology ( $p < 0.05$ ). Protein scores are derived from ions scores as a non-probabilistic basis for ranking protein hits.

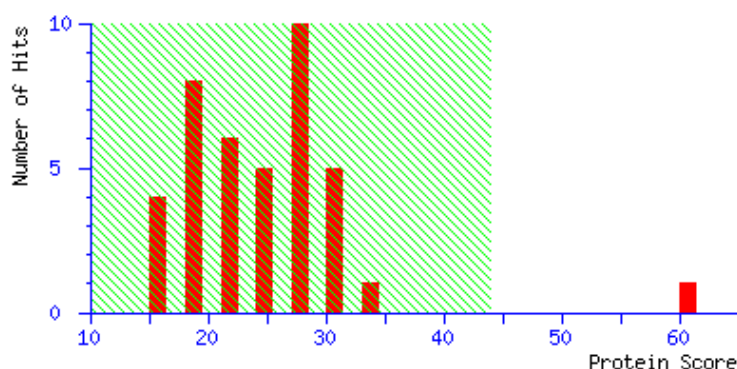

Matched peptide sequences: shown in **Bold Red**:

```
1  MAPIAVGDVI PDGTLAFLDN DNKPQSVSIH SLAKGKKVII FGVPGAFTPT
51  CSLKHVPGFI ERAEELKGGK VDEIICISVN DPFVMKSWAN TFPENKHVTF
101 LADGSAKYTH DLGLELDLSE KGLGIRSKRF ALLVEDLKVK VANIESGGEF
151 TVSSAEEIIK AL
```

Spot No.: 54

NCBI accession No.: [gi|34538473](#) Species: *Hordeum vulgare*

Protein name: **caleosin 1**

PMF score: **84**

Sequence coverage %: **19**

Matched peptides No.: **10**

Total peptides No.: **37**

Calculated Mr: **34330**

Calculated pI: **6.11**

Probability Based Mowse Score:

Protein score is  $-10 \cdot \log(P)$ , where P is the probability that the observed match is a random event. Protein scores greater than 73 are significant ( $p < 0.05$ ).

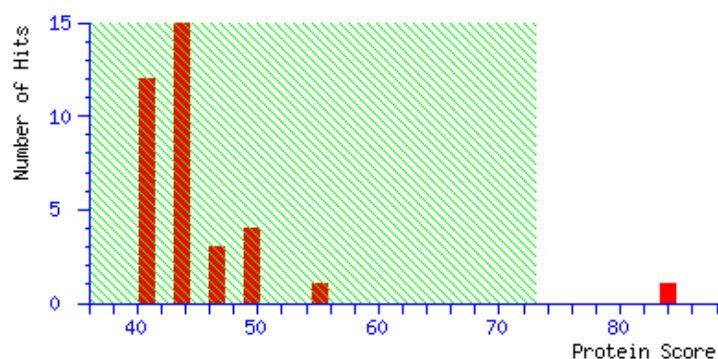

Matched peptide sequences: shown in **Bold Red**

```
1  MATKARKVEV  RASRAEGKG  DAADVHVLRE  AMRADGKGDH  DTAGGANRAD
51  GHGDAGGRVG  DSRGVDGKDS  LKMVALQAPV  TVERPVRGDL  EEHVPKPYLA
101 RALAAPDMYH  PEGTTTDDHQ  HHNMSVLQQH  VAFFDRDNGG  IIYPWETYDG
151 CRAVGFNVM  SAFIAFLVNL  VMSYPTLPGW  LPNPLFPIYV  HNIHKSKHGS
201 DSGTYDKEGR  FMPVNFENIF  SKYARTYPDR  LSYREEMWRMT  EGCREVDFDF
251 GWVAMKLEWS  ILYALARDE  GYLSREAIRR  MYDGSLFEYM  ERQRMEHVKM
301 S
```

Spot No.: 55

NCBI accession No.: [gi|225440278](#) Species: *Vitis vinifera*

Protein name: **PREDICTED: hypothetical protein**

PMF score: **88**

Sequence coverage %: **41**

Matched peptides No.: **7**

Total peptides No.: **14**

Calculated Mr: **19226**

Calculated pI: **9.57**

Probability Based Mowse Score:

Protein score is  $-10 \cdot \log(P)$ , where P is the probability that the observed match is a random event. Protein scores greater than 73 are significant ( $p < 0.05$ ).

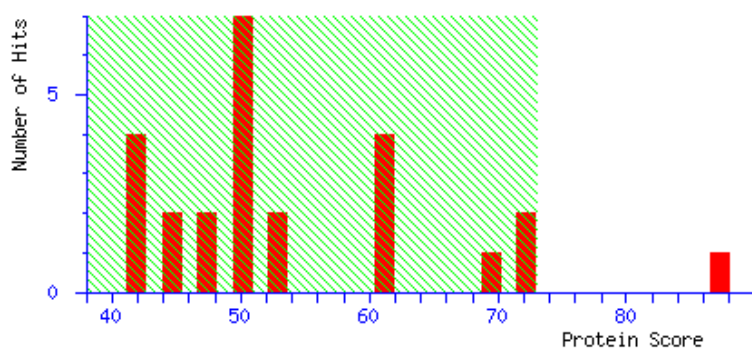

Matched peptide sequences: shown in **Bold Red**

1 **MDHYEALGIG** **RNASKGEIKE** **AFRKLALKYH** **PDKHAQSPKA** VRDGATLRFK  
51 QVSEAYEVLS DDRKRSLYNL RSSTAPPGFS GGYAHSYHYN NERPRY**SSRP**  
101 **NADAFVSKFE** **VVLRFLTTRA** **FLLNVAFAGA** **LLGGMAIDR** SGETLWKMNN  
151 SGKSFDEAME SIGKAKAHKD DM

Spot No.: **56**

NCBI accession No.: **gi|2213877** Species: *Hevea brasiliensis*

Protein name: **glutamine synthetase**

**PMF** score: **83**

Sequence coverage %: **38**

Matched peptides No.: **14**

Total peptides No.: **76**

Calculated Mr: **39504**

Calculated pI: **5.81**

Probability Based Mowse Score:

Protein score is  $-10 \cdot \log(P)$ , where P is the probability that the observed match is a random event. Protein scores greater than 73 are significant ( $p < 0.05$ ).

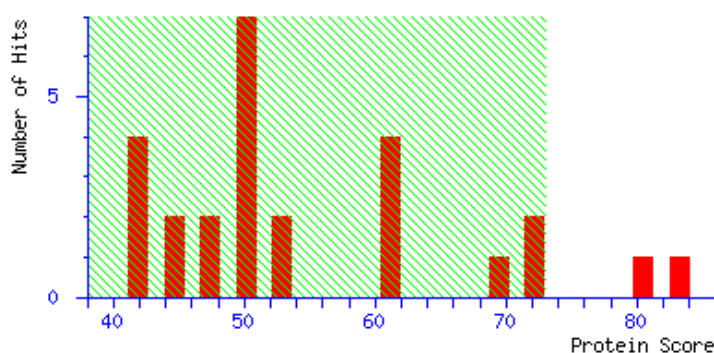

Matched peptide sequences: shown in **Bold Red**:

```
1  MSLLSDLINL  NLSDTTDKII  AEYIWIGGSG  MDMRSKARTL  SGPVSDPSKL
51  PKWNYDGSST  GQAPGEDSEV  ILYPQAIFKD  PFRRGNNILV  MCDAYTPAGE
101 PIPTNKRHAA  AKIFSHPDVV  AEEPWYGIEQ  EYTLQQRDVK  WPIGWPLGGY
151 PGPQGPYYCS  IGADKSFGRD  VVDSHYKSCV  YAGINISGIN  GEVMPGQWEF
201  QVGPAVGISA  GDELWVARYI  LERITEIAGV  VLSFDPKPIQ  GDWNGAGAHT
251 NYSTKSMRHD  GGYEVIKKAI  EKLGLRHKEH  IAAYGEGNER  RLTGRHETAD
301 INTFLWGVAN  RGASIRVGRD  TEKQGKGYFE  DRRPASNMDP  YVVTSMIAET
351  TILWKP
```



Spot No.: **57**

NCBI accession No.: **gi|172050753** Species: *Capparis spinosa*

Protein name: **70 kDa heat shock protein**

**PMF** score: **102**

Sequence coverage %: **36**

Matched peptides No.: **19**

Total peptides No.: **58**

Calculated Mr: **71456**

Calculated pI: **5.21**

Probability Based Mowse Score:

Protein score is  $-10 \cdot \log(P)$ , where P is the probability that the observed match is a random event. Protein scores greater than 73 are significant ( $p < 0.05$ ).

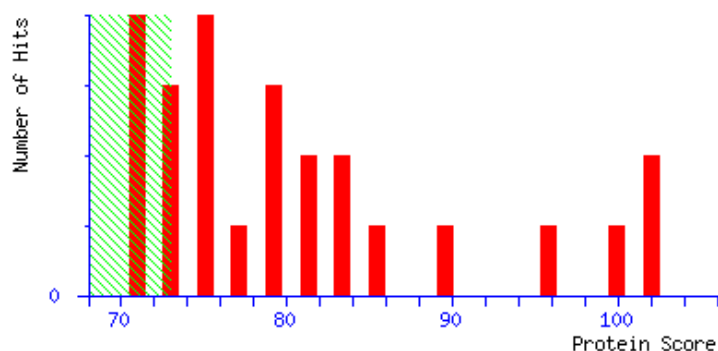

Matched peptide sequences: shown in **Bold Red**:

```
1  MAGKGEPAI  GIDLGTTYSC  VGVWQHDRVE  I IANDQGNRT  TPSYVAFTDT
51 ERLIGDAAKN  QVAMNPINTV  FDAKRLIGRR  YSDSSVQADM  KLWPFKVVPG
101 SGDKPMIVVN  YKGEEKQFAA  EEISSMVLIK  MREIAEAFLG  CTIKNGVVTV
151 PAYFNDSQRQ  ATKDAGVIAG  LNMRIINEP  TAAAIAYGLD  KKAASVGEKN
201 VLIFDLGGGT  FDVSLLTIEE  GIFEVKATAG  DTHLGGEDFD  NRMVNHFVQE
251 FKRKNKRDIS  GNPRALRRLR  TACERAKRTL  SSTAQTTEI  DSLYEGIDFY
301 TTITRARFEE  LNMDLFRKCM  EPVEKCLRDA  KMDKSNVHDI  VLVGGSTRIP
351 KVQQLLQDFF  NGKELCKSIN  PDEAVAYGAA  VQAAILSGEG  NEKVQDLLLL
401 DVTPLSLGLE  TAGGVMTVLI  PRNTTIPTKK  EQIFSTYSDN  QPGVLIQVYE
451 GERARTKDNN  LLGKFELTGI  PPAPRGVPQI  NVCFDIDANG  ILNVAEDKT
501 TGQKNKITIT  NDKGRLSKEE  IEKMQEAEK  YKSEDEEHK  KVEAKNALEN
551 YAYNMRNTIK  DEKIGSKLDP  ADKKKIEDAI  DQAIQWLDGN  QLAEAEDEFKD
601 KMKELESICN  PIIARMYQGA  GGDMGGAGGA  DDASPAGGSG  AGPKIEEVD
```

Spot No.: **58**

NCBI accession No.: **gi|762844** Species: *Solanum lycopersicum*

**PFF** score: **[151]** Protein name: **Hsc70**

Matched peptides No.: **[3]** Sequence coverage %: **[10]**

Matched sequences: **K.ATAGDTHLGGEDFDNR.M;**  
**R.TLSSTAQTTIEIDSLYEGIDFYTTITR.A;**  
**K.EQVFSTYSDNQPGVLIQVYEGER.A**

Calculated Mr: **71869**

Calculated pl: **5.18**

Probability Based Mowse Score:

Ions score is  $-10 \cdot \log(P)$ , where P is the probability that the observed match is a random event. Individual ions scores  $> 45$  indicate identity or extensive homology ( $p < 0.05$ ). Protein scores are derived from ions scores as a non-probabilistic basis for ranking protein hits.

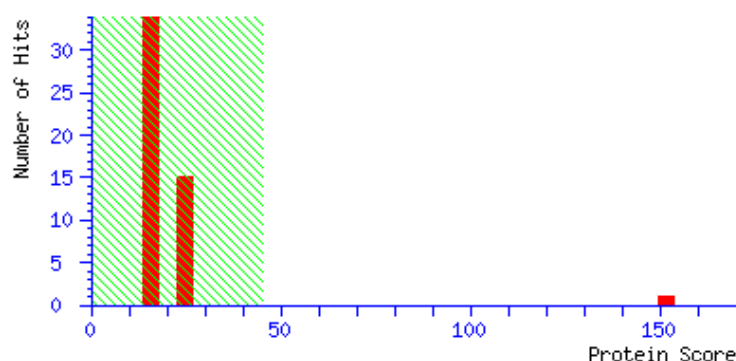

Matched peptide sequences: shown in **Bold Red**:

```
1  MAGKGEGPAI  GIDLGTTYSC  VGVWQHDRV  IIANDQGNRT  TPSYVAFTDT
51  ERLIGDAAKN  QVAMNPTNTV  FDAKRLIGR  FSDPSVQSDM  KLWPFKVIPG
101 PADKPMIVVN  YKGEKQFSA  EEISSMVLK  MKEIAEAFGL  TTIKNAVVTV
151 PAYFNDSQRQ  ATKDAGTISG  LNMRIINEP  TAAAIAYGLD  KkisSTGEKT
201 VLIFDLGGGT  FDVSLLTIEE  GIFEVKATAG DTHLGGEDFD NRMVNHVQ
251 FKRKHKKDIS  GNPRALRRLR  TACERAKRTL SSTAQTTIEI DSLYEGIDFY
301 TTITRARFEE  LNMDLFRKCM  EPVEKCLRDA  KIDKSGVHDI  VLVGGSTRIP
351 KVQQLLQDF  NGRELCKSIN  PDEAVAYGAA  VQAAILSSEG  NEKVQDLLLL
401 DVTPLSLGLE  TAGGVMTTLI  PRNTTIPTKK EQVFSTYSDN QPGVLIQVYE
451 GERARTRDNN  LLGKFELTGI  PPAPRGVPQI  TVCFDIDANG  ILNVS AEDKT
501 TGQKNKITIT  NDKGRLSKDE  IEKMQEAEK  YKAEDEEHK  KVEAKNALEN
551 YAYNMRNTIK  DDKIASKLSP  DEKKKIEDSV  EQAIQWLDGN  QLAEAEFED
601 KMKELESICN  PIIAKMYQGR  AGPDMAGGMD  EDGPSAGASS  AGAGPKIEEV
651  D
```

Spot No.: **59**

NCBI accession No.: **gi|356552478** Species: *Glycine max*

Protein name: **PREDICTED: heat shock cognate protein 80-like**

Mascot score: **107**

Sequence coverage %: **25**

Matched peptides No.: **21**

Total peptides No.: **54**

Calculated Mr: **80422**

Calculated pI: **4.98**

Probability Based Mowse Score:

Protein score is  $-10 \cdot \log(P)$ , where P is the probability that the observed match is a random event. Protein scores greater than 73 are significant ( $p < 0.05$ ).

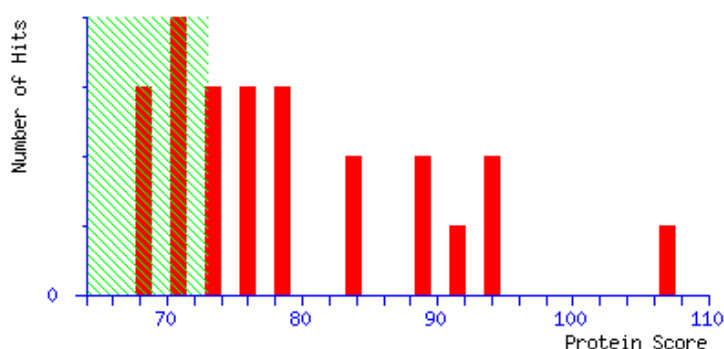

Matched peptide sequences: shown in **Bold Red**:

```
1 MASETETFAF QAEINQLLSL IINTFYSNKE IFLRELISNA SDALDKIRFE
51 SLTDKSKLDA QPELFIHIIP DKTNNTLSII DSGIGMTKAD LVNNLGTIAR
101 SGTKEFMEAL AAGADVSMIG QFGVGFYSAY LVADKVIVIT KHNDDEQYVW
151 ESHAGGSFTV TRDTSGENLG RGTKITLFLK EDQLEYLEER RLKDLIKHS
201 EFISYPISLW IEKTEKEIS DDEDEEEKD EEGKVEDVDE DKEKEEKKK
251 TIKEVSHEWS LVNKQKPIWM RKPEEITKEE YAAFYKSLTN DWEEHLAVKH
301 FSVEGQLEFK AVLFIPKRAP FDLFDTRKKP NNIKLYVRRV FIMDNCEELM
351 PEYLSFVKGI VSEDLPLNI SREMLQONKI LKVIRKNLVK KCIEMFFEIA
401 ENKEDYNKFY EAFSKNLKLG IHEDSQNKTK LAELLRYHST KSGDEMTSLK
451 DYVTRMKEGQ NDIYYITGES KKAVENSPFL EKLKKKGYEV LYMVDAID EY
501 AVGQLKEFEG KKLVSATKEG LKLDESEDEK KKKEELKDKF EGLCHVIKDV
551 LGDKVEKVVV SDRVVDSPCC LVTGEYGWTA NMERIMKAQA LRDSSMAGYM
601 SSKKTMEINP ENPIMEELRK RADADKNDKS VKDLVLLLFE TALLTSGFSL
651 DDPNTFGNRI HRMLKLGLSI DEDAGEADAD MPPLEDADAD AEGSKMEEVD
```

Spot No.: **60**

NCBI accession No.: **gi|356510919** Species: *Glycine max*

PFF score: **[51]**

Protein name: **PREDICTED: UDP-glycosyltransferase 75D1-like**

Matched peptides No.: **[1]** Sequence coverage %: **[2]**

Matched sequences: **K.CVEEVMGSGELR.R**

Calculated Mr: **52131**

Calculated pl: **5.07**

Probability Based Mowse Score:

Ions score is  $-10 \cdot \log(P)$ , where P is the probability that the observed match is a random event. Individual ions scores  $> 45$  indicate identity or extensive homology ( $p < 0.05$ ). Protein scores are derived from ions scores as a non-probabilistic basis for ranking protein hits.

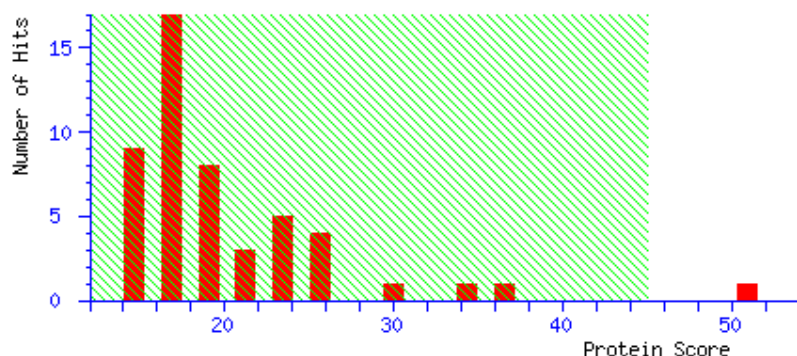

Matched peptide sequences: shown in **Bold Red**:

```
1 MLHHRFLLVI YPGQGQINPA LQFAKRLTAM GARVTIPITL DMHRRMTNTT
51 AVPGLSLAPF SDGYDDGFHA IRGTDSDYNL YASELKRRAS VFVSNLILSS
101 ANEGHPFTCL LYTLVLPWAP QVARGNLNPT AMLWIQPATV LDILYHYFHG
151 YADYINDETK ENIVLPGLSF SLSPRDIPSF LLTSKPSLLS FVFPLFEEQI
201 KQLDLEANPK VLVNTFEALE EEALRAVDKL NMIPIGPLIP TAFLGGKDPE
251 DTSFGDLLQ VSNQYVEWLD SKEDKSVVYV SFGSYFELSK RQTEEIARAL
301 LGCSFPFLWV IRVKEEKEE EEELCFREEL EGKGKLVKWC SQVEVLSHGS
351 VGCFVTHCGW NSTMESLVSG VPMVAFPQWS DQKTNAKLIE DVWKIGVRVE
401 NDGDGIVEKE EIRKCVEEVM GSGELRRNAE KWKGLAREAA KEGGPSENL
451 KAFLDAMAAL QF
```

Spot No.: **61**

NCBI accession No.: **gi|255560725** Species: *Ricinus communis*

Protein name: **dead box ATP-dependent RNA helicase, putative**

Mascot score: **144**

Sequence coverage %: **68**

Matched peptides No.: **25**

Total peptides No.: **91**

Calculated Mr: **47097**

Calculated pI: **5.49**

Probability Based Mowse Score:

Protein score is  $-10 \cdot \log(P)$ , where P is the probability that the observed match is a random event. Protein scores greater than 73 are significant ( $p < 0.05$ ).

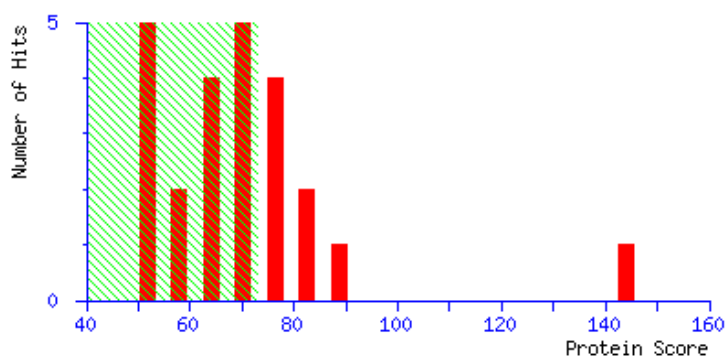

Matched peptide sequences: shown in **Bold Red**:

```
1  MAGLAPEGSQ FDAKQYDARM SELLSTEGQE FFTTYDEVYD SFDAMGLQEN
51 LLRGIYAYGF EKPSAIQQRG IVPFCKGLDV IQQAQSGTGK TATFCSGILQ
101 QLDYGLVQCQ ALVLAPTREL AQQIEKVMRA LGDYLGVKVH ACVGGTSVRE
151 DQRILQAGVH VVVGTPGRVF DMLRRQSLRP DYIKMFVLDE ADEMLSRGFK
201 DQIYDIFQLL PAKVQGVVFS ATMPPEALEI TRKFMNKPVR ILVCRDELTL
251 EGIKQFYVNV EKEEWKLETL CDLYETLAIT QSVIFVNTRR KVDWLTDKMR
301 SRDHTVSATH GDMDQNTRDI IMREFRSGSS RVLITTDLLA RGIDVQQVSL
351 VINYDLPTQP ENYLHRIGRG GRFGRKGVAI NFVTRDDERM LFDIQKFYNV
401 VIEELPSNVA DLL
```

Spot No.: **62**

NCBI accession No.: **gi|4235430** Species: *Hevea brasiliensis*

**PFF** score: **[142]** Protein name: **latex-abundant protein**

Matched peptides No.: **[9]** Sequence coverage %: **[16]**

Matched sequences: **R.SAEPGDLLFVHYSGHGTR.L;**

**R.EFVDQVPHGCR.I;**

**R.EFVDQVPHGCR.I;**

**K.QTIQDAFESR.G;**

**K.QTIQDAFESR.G;**

**R.VVEEDYGDSGYVK.S;**

**R.VVEEDYGDSGYVK.S;**

**K.LRPTLFDMFGDDASPK.V +Oxidation(M);**

**K.LRPTLFDMFGDDASPK.V + Oxidation (M)**

Calculated Mr: **46443**

Calculated pI: **5.01**

Probability Based Mowse Score:

Ions score is  $-10 \cdot \log(P)$ , where P is the probability that the observed match is a random event.

Individual ions scores  $> 45$  indicate identity or extensive homology ( $p < 0.05$ ).

Protein scores are derived from ions scores as a non-probabilistic basis for ranking protein hits.

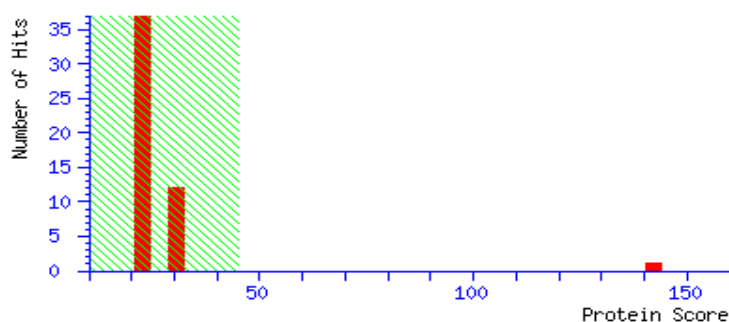

Matched peptide sequences: shown in **Bold Red**:

```
1  MAKKAVLIGI  NYPGKAELEK  GCINDVKRMY  RCLVDRYGFS  EEDITVLIDI
51  DESYIQPTGK  NIRRVLTDLV  RSAEPGDLLF  VHYSGHGTRL  PAETGEDDDT
101  GFDECIVPCD  MNLITDDDFR  EFVDQVPHGC  RITVVSDSCH  SGGLIDEAKE
151  QIGESTKRKE  EEESGFGFK  SFLKQTIQDA  FESRGVHLPS  DLHHHHGHRD
201  EEDFDNRVVE  EDYGDSGYVK  SKSLPLSTLI  EILKQKTGKD  DIDVGKLRPT
251  LFDMFGDDAS  PKVKKFMKVI  LNKLRHGDGE  SGGGGFLGMV  GSLAQEFLKH
301  KLDENDESIV  KPALETEVDS  KQEVYAGKTK  RSLPDGGILI  SGCQTDQ TSA
351  DASPSGKSSE  AYGALSNAIQ  TIIAETDGAV  TNQELVLKAR  KMLKKQGFTQ
401  KPGLYCSDDH  VEASFVC
```

Spot No.: **63**

NCBI accession No.: **gi|255578278** Species: *Ricinus communis*

PFF score: **[76]**

Protein name: **hypothetical protein RCOM\_0537780**

Matched peptides No.: **[3]** Sequence coverage %: **[6]**

Matched sequences: **K.QESEYGSGGYGR.R;**  
**R.KPSYGEEGGYGER.T ;**  
**R.KPSYGEEGGYGER.T**

Calculated Mr: **41389**

Calculated pI: **4.65**

Probability Based Mowse Score:

#### Mascot Score Histogram

Ions score is  $-10 \cdot \log(P)$ , where P is the probability that the observed match is a random event. Individual ions scores  $> 44$  indicate identity or extensive homology ( $p < 0.05$ ). Protein scores are derived from ions scores as a non-probabilistic basis for ranking protein hits.

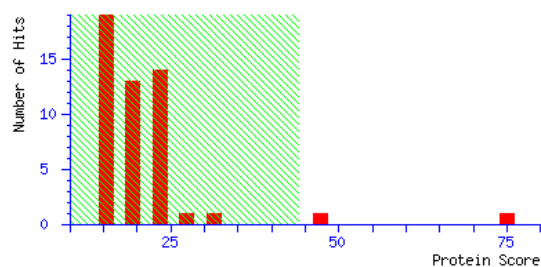

Matched peptide sequences: shown in **Bold Red**:

```
1  MPYYTRSEDD  VDNDFDFDPT  PYGGGYDLAL  TYGRPLPPSD  ETCYQNSAIA
51  DDDVDYDRPN  FTSYAEPSAY  NDDILQEEYN  SYSRPKPRPG  FIPGGGIGGD
101  PYSRPHAAPG  FQPGSGGYGG  VSEYEKPSGY  GRRPDSEYGS  GGYGGGTEYE
151  RPSGEDYGS  HGRKQDSEYG  SGGYGRRPES  EYGSGGGYER  PSSEEYGSY
201  GRKQESEYGS  GGYGRRPEAE  YGSGYGGRPE  TEYGGGGGSE  YGGGYGRKPS
251  YGEEGGYGER  TEYERPSYGD  DPPRRPGYGR  QDDEYERPSY  ERKSDDDNDG
301  SRRKYGGDDD  EKGYQKKYGG  YGDDDDDEEGS  RRYGYGGEE  ESYGRKKYGD
351  DGSDDDEK  HRKHQH  SDDE
```



Spot No.: **64**

NCBI accession No.: **gi|5302811** Species: *Arabidopsis thaliana*

**PFF** score: **[98]** Protein name: putative serine protease-like protein

Matched peptides No.: **[1]** Sequence coverage %: **[2]**

Matched sequences: **R.QEQAAFIEEISR.T**

Calculated Mr: **47129**

Calculated pI: **5.15**

Probability Based Mowse Score:

Ions score is  $-10 \cdot \log(P)$ , where P is the probability that the observed match is a random event.

Individual ions scores  $> 45$  indicate identity or extensive homology ( $p < 0.05$ ).

Protein scores are derived from ions scores as a non-probabilistic basis for ranking protein hits.

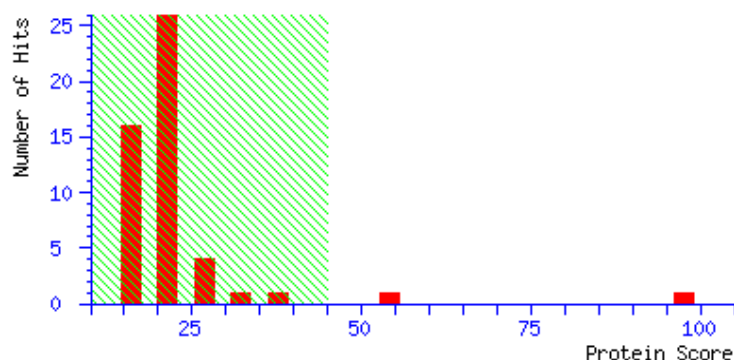

Matched peptide sequences: shown in **Bold Red**:

```
1  MVVMMKATRG  TRDPDLLGLM  FVHHQFLFCV  ISFFYLLLRD  FEFLNDSSS
51  GIWTWSQVVS  ETQALPYLQK  AFNIQHDFDP  TQEDQEENTY  AAKVSEKQDF
101 SKEQWQDYKR  PASEQHYSDE  VETYGNLEPS  QLELSGLSEA  CNKLWELDLN
151 RLVPGRIIKS  TAEMGKGSMR  ELIWLKDYCS  LGFCSLLDNY  NPNEGYKEVV
201 TEEERQEQAA FIEEISRTSV  IKYLHRYLVL  KDVAPGSYLE  FKRMLTSLWF
251 DLYGRGGTSG  SSSAFEHV FV  GEIKQSGGNK  SLDSITGFST  SKPVTDRETT
301 LLLRMQPDSE  TQLLTIQFEW  NGVLKSVSST  LVGVSPEFEL  ALYTMCFPMG
351 TEDNHIQLGP  YNVNVKCYRL  GNNRIALSFP  HCRILKPLLM  ALVTKYLPLA
401 QYCIELL
```



Spot No.: **65**

NCBI accession No.: **gi|2506277** Species: *Pisum sativum*

Protein name: **RuBisCO large subunit-binding protein subunit beta**

**PMF** score: **102**

Sequence coverage %: **34**

Matched peptides No.: **17**

Total peptides No.: **54**

Calculated Mr: **63287**

Calculated pI: **5.85**

Probability Based Mowse Score:

Protein score is  $-10 \cdot \log(P)$ , where P is the probability that the observed match is a random event. Protein scores greater than 73 are significant ( $p < 0.05$ ).

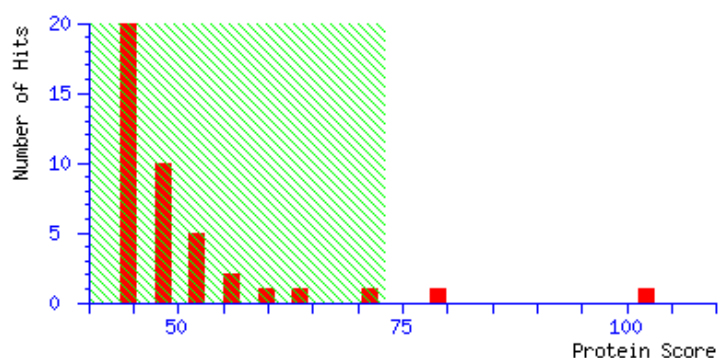

Matched peptide sequences: shown in **Bold Red**:

|     |                     |                   |                    |                    |                            |
|-----|---------------------|-------------------|--------------------|--------------------|----------------------------|
| 1   | MASTFSATTS          | SCNLSSSAI         | SSFPLAAGKR         | NANKVVLPRK         | NRNVKVSAMA                 |
| 51  | KELHFNKDGS          | AIKKLQNGVN        | <b>KLADLVGVTL</b>  | <b>GPKGRNVVLE</b>  | <b>SKYGSPKIVN</b>          |
| 101 | DGVTVAKE <b>EVE</b> | <b>LEDPVENIGA</b> | <b>KLVRQAAAKT</b>  | <b>NDLAGDGTTT</b>  | <b>SVVLAQGLIA</b>          |
| 151 | <b>EGVKVVAAGA</b>   | <b>NPVLITRGIE</b> | <b>KTSKALVAEL</b>  | <b>KKMSKEVEDS</b>  | <b>ELADVAAVSA</b>          |
| 201 | GNNHEVGNMI          | AEALSKVGRK        | GVVTLLEEGKS        | <b>AENSLYVVEG</b>  | <b>MQFDRGYISP</b>          |
| 251 | <b>YFVTDSEKMT</b>   | <b>VEFENCKLLL</b> | <b>VDKKITNARD</b>  | <b>LINILED AIR</b> | <b>SGFP I V I I A E</b>    |
| 301 | DIEQEALATL          | VVNKLRGSLK        | IAALK <b>APGFG</b> | <b>ERKSQYLDDI</b>  | <b>A I L T G G T V I R</b> |
| 351 | EEVGLTLDKA          | DKEVLGNAAK        | VVLT KD T T T I    | VGDGSTQEAV         | NKRVSQIKNQ                 |
| 401 | IEAAEQEYEK          | EKLSERIAKL        | SGGVAVIQVG         | AQTETELKEK         | KLRVEDALNA                 |
| 451 | <b>TKAAVEEGIV</b>   | <b>VGGGCTLLRL</b> | <b>ASKVDAIKDT</b>  | <b>LANDEEKVGA</b>  | <b>DIVKRALSYP</b>          |
| 501 | LKLIAKNAGV          | NGSVVSEKVL        | SSDNPKYGYN         | AATG <b>KYEDLM</b> | <b>AAGIIDPTKV</b>          |
| 551 | <b>VRCCLEHASS</b>   | VAKTFLMSDC        | VVVEIKEPES         | APVGNPMDNS         | GYGNI                      |

Spot No.: **66**

NCBI accession No.: **gi|255543357** Species: *Ricinus communis*

Protein name: **heat shock protein, putative**

**PMF** score: **88**

Sequence coverage %: **29**

Matched peptides No.: **18**

Total peptides No.: **79**

Calculated Mr: **71965**

Calculated pI: **5.27**

Probability Based Mowse Score:

Protein score is  $-10 \cdot \log(P)$ , where P is the probability that the observed match is a random event. Protein scores greater than 73 are significant ( $p < 0.05$ ).

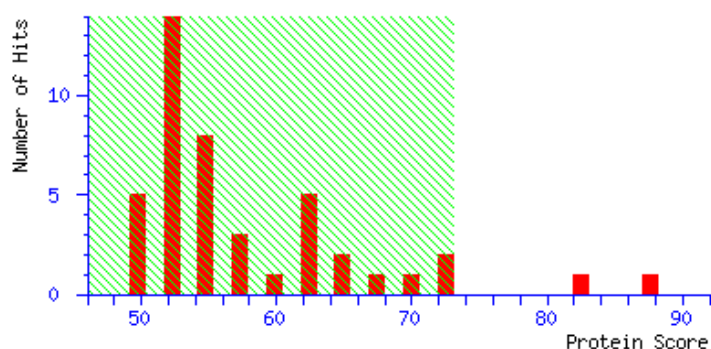

Matched peptide sequences: shown in **Bold Red**:

```
1  MAKTEGKAVG  IDLGTTYSCV  GVMQNDRVEI  IANDQGNRTT  PSYVAFTDTE
51  RLIGDAAKNQ  VAMNPQNTVF  DAKRLIGRRF  SDPSVQSDMK  HWPFKVVPGP
101  GDKPMIVVLY  KGEEKQFAPE  EISSMVLIKM  KEIAEAYLGQ  TVKNAVITVP
151  AYFNDSQRQA  TKDAGAISGL  NVMRIINEPT  AAAIAYGLDK  KGSRSGEKNV
201  LIFDLGGGTF  DVSLLTIEEG  IFEVKKATAGD  THLGGEDFDN  RLVNHFVAEF
251  RRKHKKDIST  NARALRRLRT  ACERAKRTLS  STSQTTIEID  SLYEGIDFYS
301  TITRARFEEL  NMDLFRKCME  PVEKCLRDSK  IDKSQVDDIV  LVGGSTRIPK
351  VQQLLQDFFN  GKELCKSINP  DEAVAYGAAV  QAAILSGEGD  QKVQELLLLD
401  VTPLSLGIET  AGGVMTVLIP  RNTTIPAKKE  QIFSTYSDNQ  PGVLIQVYEG
451  ERARTKDNNL  LGTFELKGIP  PAPRGVPQIN  VCFDIDANGI  LNVSAEDKTA
501  GVKNKITITN  DKGRLSKEDI  ERMVQEAEKY  KAEDEQVKKK  VEAKNALENY
551  AYNMRNTVKD  EKFAGKLDSA  DKQKIEKAID  ETIEWLDGNQ  LAEVDEFEDK
601  LKELEGLCNP  IVSKMYQGGG  GGDVPMGGGA  KPGSGYGNAS  SGGSGSGPKI
651  EEVD
```

Spot No.: **67**

NCBI accession No.: **gi|224100473** Species: *Populus trichocarpa*

**PFF** score: **[91]**

Protein name: **predicted protein**

Matched peptides No.: **[1]**

Sequence coverage %: **[3]**

Matched sequences: **R.SPPIEEVIQAGVVPR.F**

Calculated Mr: **46093**

Calculated pI: **4.54**

Probability Based Mowse Score:

Ions score is  $-10 \cdot \log(P)$ , where P is the probability that the observed match is a random event.

Individual ions scores > 42 indicate peptides with significant homology.

Individual ions scores > 44 indicate identity or extensive homology ( $p < 0.05$ ).

Protein scores are derived from ions scores as a non-probabilistic basis for ranking protein hits.

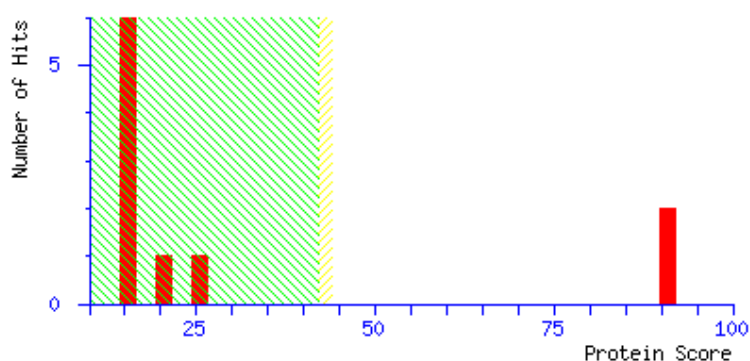

Matched peptide sequences: shown in **Bold Red**:

```
1  GVWSEDGNLQ  LESTTQFRKL  LSIERSSPPIE  EVIQAGVVPR  FVEFLVREDF
51  PQLQFEAAWA  LTNIASGTSE  NTKVVIDHGA  VPIFVKLLGS  PSDDVREQAV
101 WALGNVAGDS  PKCRDLVLSH  GALIPLLAQL  NEHAKLSMLR  NATWTLSNFC
151 RGKPQPPFEQ  VRPALPALER  LVHSTDEEVL  TDSCWALSYL  SDGTDDKIQA
201 VIEAGVCPRL  VELLHPSPS  VLVPALRTVG  NIVTGDDMQT  QVKALLAFCL
251 FVPSFAVIEN  GLIGPLVNLL  QNAEFDIKKE  AAWAVSNATS  GGTHEQIKFL
301 VSQGCIKPLC  DLLVSPDPRI  VTVSLEGLEN  ILKVGEAEKN  LGNSGDANFY
351 AQMIDDAEGL  EKIENLQSHD  NNEIYEKAVK  ILETYWLEED  DETLPSGDGA
401 QQGFQFGGNG  VQVPSGGFNF
```

Spot No.: **68**

NCBI accession No.: **gi|31580730** Species: *Hevea brasiliensis*

Protein name: latex cyanogenic beta glucosidase

PMF score: **84**

Sequence coverage %: **27**

Matched peptides No.: **12**

Total peptides No.: **51**

Calculated Mr: **56325**

Calculated pI: **5.72**

Probability Based Mowse Score:

Protein score is  $-10 \cdot \log(P)$ , where P is the probability that the observed match is a random event. Protein scores greater than 73 are significant ( $p < 0.05$ ).

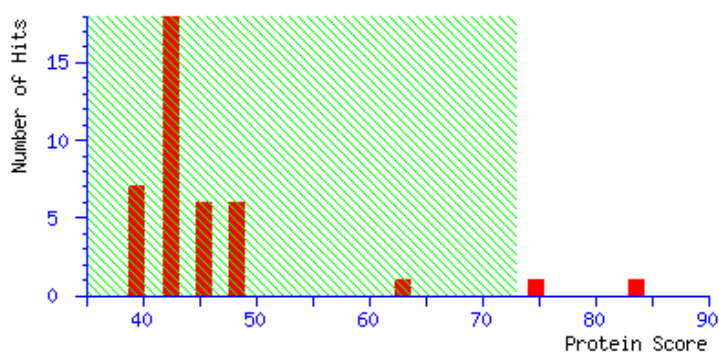

Matched peptide sequences: shown in **Bold Red**:

```
1 MMKEKFLKEH PYLLEKEVSR SDFPPNFLFG VATSAYQIEG GCREGGRGPS
51 IWDAPSHTKG TILDGSNGDV AVDHYHRYKE DIELIAKLG DAYRFSLSWS
101 RIFPDGLGTK VNEEGIAFY NIINALLEK IEPYITLYHW DLPLHLQESM
151 GGWLNKEIVK YFAIYADTCF ASFGDRVKKW ITLNEPLQTA VNGFDTGILA
201 PGKHEHSYTE PFLASHHQIL AHATAVSIYR SMYKDNQGGE VGLVVDCEWA
251 ESNSDKIEDK AAAAKRLEFQ LGWYLHPLYY GDYPEVMRKI LGGGLPKFSE
301 EDKELLRNSL DFIGLNHYSS RFIKHVTDSP AECYYYKAQE IERLAKWEDG
351 EPIGERAASE WLYVRPWGLR KVLNYIVQRY NNPIIYVTEN GMDDEDSSAP
401 LHEMLDDKLR VRYFKGYLAA VAQAIKD GAD VRGYFAWSLL DNFWEAQGYT
451 KRFGLIYVDY KNGLARHPKS SAYWFMRFLK GDEGKNGKE
```

Spot No.: **69**

NCBI accession No.: **gi|2501850** Species: *Nicotiana tabacum*

Protein name: **GDP dissociation inhibitor**

**PMF** score: **83**

Sequence coverage %: **34**

Matched peptides No.: **16**

Total peptides No.: **62**

Calculated Mr: **50127**

Calculated pI: **5.44**

Probability Based Mowse Score:

Protein score is  $-10 \cdot \log(P)$ , where P is the probability that the observed match is a random event. Protein scores greater than 73 are significant ( $p < 0.05$ ).

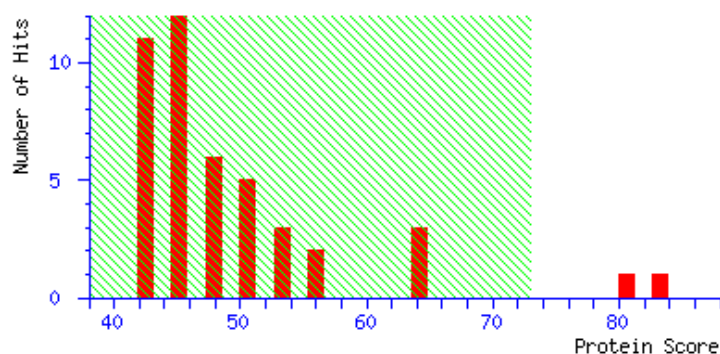

Matched peptide sequences: shown in **Bold Red**:

```
1  MDEEYDVIVL  GTGLKECILS  GLLSVDGLKV  LHMDRNDYYG  GESTSLNLVQ
51 LWKRFRGSDK  PPAELGSSRD  FNVDMIPKFI  MANGALVRVL  IHTDVTKYLY
101 FKAVDGSEFVY NKGKVHKVPA TDMEALKSPL MGIFEKRRAR KFFIYVQDYN
151 ESDPKTHEGM  DLTRVTREL  IAKYGLDDNT  VDFIGHALAL  HRDDRYLDEP
201 AQDTVKRMKL YAESLARFQG GSPYIYPLYG LGELPQAFAR LSAVYGGTYM
251 LNKPECKVEF  DEEGKVCGVT  SEGETAKCKK  VVCDPSYLPN  KVRKVGKVAR
301 AIAIMSHPIP  NTNDSHSVQI  ILPQQLGRK  SDMYLFCCSY  THNVAPKGKF
351 IAFVSTEAE  DNPESLQKQ  VNLLGPVDEI  FYETYDRSEP  VNEPSLDNCF
401 ISTSYDATTH  FESTVDDVLN  LYTKITGKVL  DLNVDLSAAS  AAEE
```

Spot No.: **70**

NCBI accession No.: **gi|2501850** Species: *Nicotiana tabacum*

**PFF** score: **[202]** Protein name: **GDP dissociation inhibitor**

Matched peptides No.: **[5]** Sequence coverage %: **[8]**

Matched sequences: **K.AVDGSFVYNK.G;**

**K.THEGMDLTR.V;**

**K.LYAESLAR.F;**

**K.KVVC DPSYLPNK.V;**

**K.VVC DPSYLPNK.V**

Calculated Mr: **50127**

Calculated pI: **5.44**

Probability Based Mowse Score:

Ions score is  $-10 \cdot \log(P)$ , where P is the probability that the observed match is a random event.

Individual ions scores  $> 45$  indicate identity or extensive homology ( $p < 0.05$ ).

Protein scores are derived from ions scores as a non-probabilistic basis for ranking protein hits.

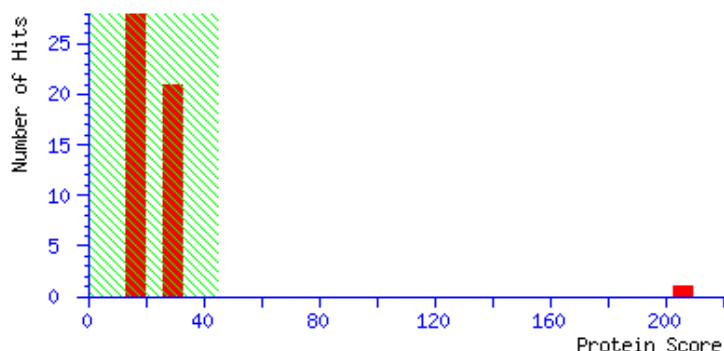

Matched peptide sequences: shown in **Bold Red**:

```
1 MDEEYDVIVL GTGLKECILS GLLSVDGLKV LHMDRNDYYG GESTSLNLVQ
51 LWKRFRGSDK PPAELGSSRD FNVD MIPKFI MANGALVRVL IHTDVTKYLY
101 FKAVDGSFVY NKGKVHKVPA TDMEALKSPL MGIFEKRRAR KFFIYVQDYN
151 ESDPKTHEGM DLTRVTTREL IAKYGLDDNT VDFIGHALAL HRDDRYLDEP
201 AQDTVKRMKL YAESLARFQG GSPYIPLYG LGELPQAFAR LSAVYGGTYM
251 LNKPECKVEF DEEGKVCVGT SEGETAKCKK VVCDPSYLPN KVRKVGKVAR
301 AIAIMSHPIP NTNDSHSVQI ILPQKQLGRK SDMYLFCCSY THNVAPKGKF
351 IAFVSTEAET DNPESELKQG VNLLGPVDEI FYETYDRSEP VNEPSLDNCF
401 ISTSYDATTH FESTVDDVLN LYTKITGKVL DLNVDLSAAS AAEE
```

Spot No.: **71**

NCBI accession No.: **gi|359478860** Species: *Vitis vinifera*

Protein name: **PREDICTED: 26S protease regulatory subunit 6B homolog**

**PMF** score: **147**

Sequence coverage %: **47**

Matched peptides No.: **18**

Total peptides No.: **44**

Calculated Mr: **47196**

Calculated pI: **5.42**

Probability Based Mowse Score:

Protein score is  $-10 \cdot \log(P)$ , where P is the probability that the observed match is a random event. Protein scores greater than 73 are significant ( $p < 0.05$ ).

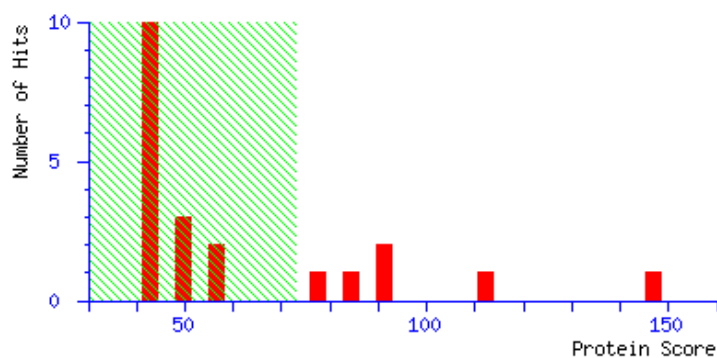

Matched peptide sequences: shown in **Bold Red**:

```
1 MAVVLEPKPS SEPPSPFPST RSDIQGFSDQ SSSFSDEDDL YGRLKSLQRQ
51 LEFIDIQEEY VKDEQKNLKR ELLRAQEEVK RIQSVPLVIG QFMEMVDQNN
101 GIVGSTTGSN YYVRILSTIN RELLKPSASV ALHRHSNALV DVLPEADSS
151 ISLLSQSEKP DVTYNDIGGC DIQKQEIREA VELPLTHHEL YKQIGIDPPR
201 GVLLYGPPGT GKTMLAKAVA NHTTAAFIRV VGSEFVQKYL GEGPRMVRDV
251 FRLAKENAPA IIFIDEVDAI ATARFDAQTG ADREVQRILM ELLNQMDGFD
301 QTVNVKVIMA TNRADTLDPA LLRPGRLDRK IEFPLPDRRQ KRLVFQVCTA
351 KMNLSDEVDL EDYVSRPDKI SAAEIAAICQ EAGMHA VRKN RYVILPKDFE
401 KGYRTNVKKP DTDFEFYK
```



Spot No.: **72**

NCBI accession No.: **gi|224071449** Species: *Populus trichocarpa*

PFF score: **[128]**

Protein name: **predicted protein**

Matched peptides No.: **[3]**

Sequence coverage %: **[4]**

Matched sequences: **R.EIYIAFR.G ;**

**K.NKIDVIPHYPGRL ;**

**K.IDVIPHYPGRL ;**

Calculated Mr: **47121**

Calculated pI: **5.28**

Probability Based Mowse Score:

Ions score is  $-10 \cdot \log(P)$ , where P is the probability that the observed match is a random event.

Individual ions scores  $> 45$  indicate identity or extensive homology ( $p < 0.05$ ).

Protein scores are derived from ions scores as a non-probabilistic basis for ranking protein hits.

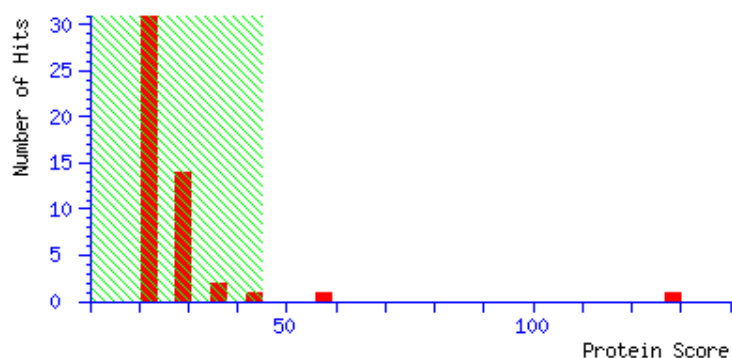

Matched peptide sequences: shown in **Bold Red**:

```
1  MDGTSEATWP  EILGSRNWDN  LLDPLDLSLR  KLILRCGDFC  QATYDAFNND
51  QNSRYCGTSR  YGKRNFHFKV  MLDNPNYQV  SSFLYATARV  SLPEAFLLHS
101 LSRDSDRET   NWIGYIAVTS  DEQTKTLGRR  EIYIAFRGTT  RNYEWDILG
151 AKLKSAPPLL  RGATSTTHDQ  ESSSSDDDD  DKVPKVMLGW  LTMYSISDPN
201 SPFTKLSARA  QLLAHIKELR  ERYKDDLSI  IFTGHSLGAS  LSILSAFDLV
251 ENGITDIPVS  AFVFGSPQVG  NKEFNERFNK  YPNLKVLHIK  NKIDVIPHYP
301 GRLMGYVYTG  IEFIDTRKS  PSLKDSKNPS  DWHNLQAMLH  IVAGWNGEEQ
351 EFELKVKRSL  ALVNKSSEFL  KDECLVPGIW  WVEKNKGMVR  NEDGEWVLAP
401 PDEEDLPVPE  C
```



Spot No.: **73**

NCBI accession No.: **gi|32186912** Species: *Gossypium hirsutum*

Protein name: **actin**

**PMF** score: **178**

Sequence coverage %: **57**

Matched peptides No.: **19**

Total peptides No.: **35**

Calculated Mr: **41936**

Calculated pI: **5.37**

Probability Based Mowse Score:

Protein score is  $-10 \cdot \log(P)$ , where P is the probability that the observed match is a random event. Protein scores greater than 73 are significant ( $p < 0.05$ ).

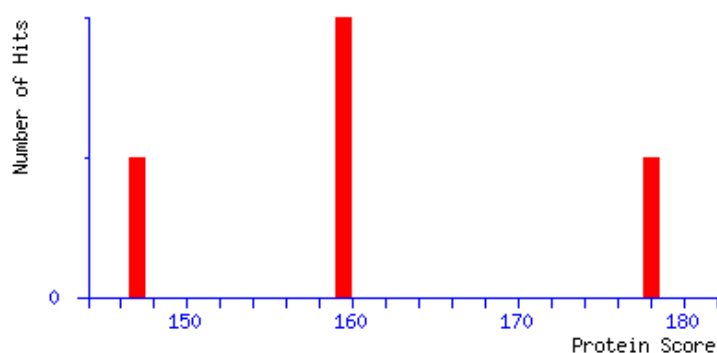

Matched peptide sequences: shown in **Bold Red**:

```
1  MADGEDIQPL  VCDNGTGMVK  AGFAGDDAPR  AVFPSIVGRP  RHTGVMVGMG
51  QKDAYVGDEA  QSKRGILTLK  YPIEHGIVSN  WDDMEKIWHH  TFYNELRVAP
101 EEHPVLLTEA  PLNPKANREK  MTHIIFETFN  VPAMYVAIQA  VLSLYASGRT
151 TGIVLDSGDG  VSHTVPIYEG  YALPHAILRL  DLAGRDLTDA  LMKILTERGY
201 MFTTTAEREI  VRDMKEKLAY  VALDYEQELE  TAKSSSSVEK  NYELPDGQVI
251 TIGAERFRCP  EVLFQPSFIG  MEAAGIHETT  YNSIMKCDVD  IRKDLYGNIV
301 LSGGSTMFPG  IAD RMSKEIT  ALVPSSMKIK  VVAPPERKYS  VWIGGSILAS
351 LSTFQQMWIS  KGEYDESGPS  IVHRKCF
```

Spot No.: **74**

NCBI accession No.: **gi|297816956**

Species: **Arabidopsis lyrata subsp. lyrata**

**PFF** score: **[70]**

Protein name: **hypothetical protein ARALYDRAFT\_486071**

Matched peptides No.: **[3]**      Sequence coverage %: **[5]**

Matched sequences: **K.APLLIGCDVR.N** ;

**K.EVIAVNQDPLGVQGR.K**;  
**K.EVIAVNQDPLGVQGR.K**

Calculated Mr: **48033**

Calculated pI: **4.79**

Probability Based Mowse Score:

Ions score is  $-10 \cdot \log(P)$ , where P is the probability that the observed match is a random event.

Individual ions scores > 45 indicate identity or extensive homology ( $p < 0.05$ ).

Protein scores are derived from ions scores as a non-probabilistic basis for ranking protein hits.

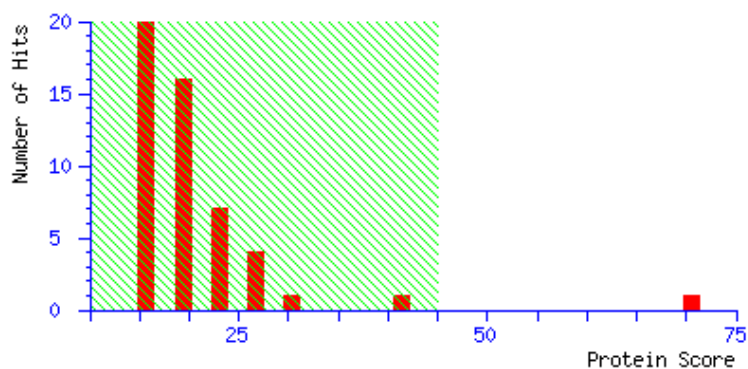

Matched peptide sequences: shown in **Bold Red**:

```
1 MKDSVLFLVG LFSLSVLVSQ SISGRVKAPL LQSNTGGLVF SKSFNSIYDT
51 SMYGRQLQNN GLARTPQMGW NSWNFFACNI NETVIKETAD ALLSSGLADL
101 GYIHVNIDDC WSNLLRDSKG QLVPHPETFP SGIKLLADYV HSKGLKLGIV
151 SDAGVFTQCQV RPSGLFHEVD DADIFASWGV DYLYKDNCFN LGIKPIKRYP
201 PMRDALNATG RSIFYSLCEW GVDDPALWAK EVGNSWRITD DINDTWASMT
251 TIADLNNKWA AYAGPGGWND PDMLEIGNGG MTYEYRGHF SIWALMKAPL
301 LIGCDVRNMT AETFEILSNK EVIAVNQDPL GVQGRKIQAN GEDDCQQVWS
351 GPLSGDRIVV ALWNRCSQA TITASWDVIG LESTISVSVR DLWQH KDVTTE
401 NASGSFEAQV DAHDCHMYVL TPQTVSHSDV
```

Spot No.: **75**

NCBI accession No.: **gi|3264769** Species: *Prunus armeniaca*

**PFF** score: **[74]** Protein name: **late embryogenesis-like protein**

Matched peptides No.: **[1]** Sequence coverage %: **[8]**

Matched sequences: **K.LVSGGLIPDAGTIHAHGEETVK.V**

Calculated Mr: **28937**

Calculated pI: **4.72**

Probability Based Mowse Score:

Ions score is  $-10 \cdot \log(P)$ , where P is the probability that the observed match is a random event.

Individual ions scores  $> 45$  indicate identity or extensive homology ( $p < 0.05$ ).

Protein scores are derived from ions scores as a non-probabilistic basis for ranking protein hits.

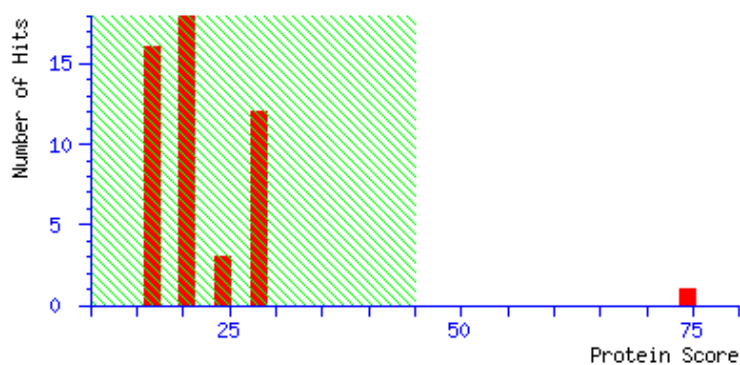

Matched peptide sequences: shown in **Bold Red**:

```
1  DVTAIHIPSI  NLEKAEIVVD  VLIKPNPVP  IPLIDINYLI  ESDGRKLVSG
51  LIPDAGTIHA HGEETVKVPV  HLVDYDDIKNT  YDDIKPGSII  PYRFKVDLIV
101 DVPVVLGRLTL  PLEKTGEIPI  PYKPDVDVEK  IKFQAQSFEE  TVAVLHVKLE
151 NMNDFDLGLN  ALDYEIWLSE  VNIGGAQLSQ  SANLAKKGVT  FIELPITFRP
201 KDFGSALWDM  IRGKGTGYTI  KGNINVDTPF  GAMKLPIVKE  GGTTLRKKNK
251 EDGGDDDDDED  ED
```

Spot No.: **76**

NCBI accession No.: **gi|168066110**

Species: **Physcomitrella patens subsp. patens**

Protein name: **predicted protein**

PMF score: **81**

Sequence coverage %: **39**

Matched peptides No.: **15**

Total peptides No.: **82**

Calculated Mr: **41963**

Calculated pI: **5.24**

Probability Based Mowse Score:

Protein score is  $-10 \cdot \log(P)$ , where P is the probability that the observed match is a random event. Protein scores greater than 73 are significant ( $p < 0.05$ ).

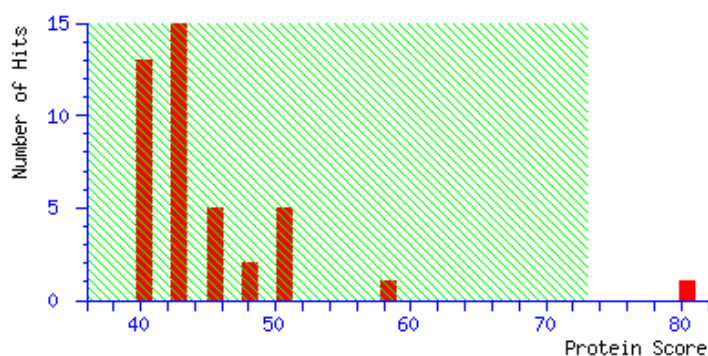

Matched peptide sequences: shown in **Bold Red**:

```
1  MEASSHYIRK HWTRATTEVL VKAGDIEEPI VALVDHGFEI NLMSKDLYKK
51 RKWPIDIEHR WVILAANNTR GELYRACSDV KIWIGDVATK RHFFVQDTTS
101 YPLILGQSYI TATRMETKVL DDGSTYARNY GGTKEEILSQ DEGTFDASFI
151 DIFESRNIIY KKVDDSKRKE IKRLYSIERE LRKLETLEDG EKILGVYEEN
201 GLEDSLELIA SIELGDNDKI VEIHSTEVYS ILESFQAPEV IVETKYKIVD
251 KKVKPLVRPL IEDSKEKME ASKEESLRDP KKIGHEFTKE TFEELKIGYD
301 GSLFPTEIEY FKKILAKRGK SFAFGSHEIG CVDPNIVALM LSRSFIDAAL
351 TSHVPLIDFL D
```

Spot No.: **77**

NCBI accession No.: **gi|388503664** Species: *Lotus japonicus*

Protein name: **unknown**

**PMF** score: **109**

Sequence coverage %: **43**

Matched peptides No.: **13**

Total peptides No.: **37**

Calculated Mr: **29537**

Calculated pI: **4.79**

Probability Based Mowse Score:

Protein score is  $-10 \cdot \log(P)$ , where P is the probability that the observed match is a random event. Protein scores greater than 73 are significant ( $p < 0.05$ ).

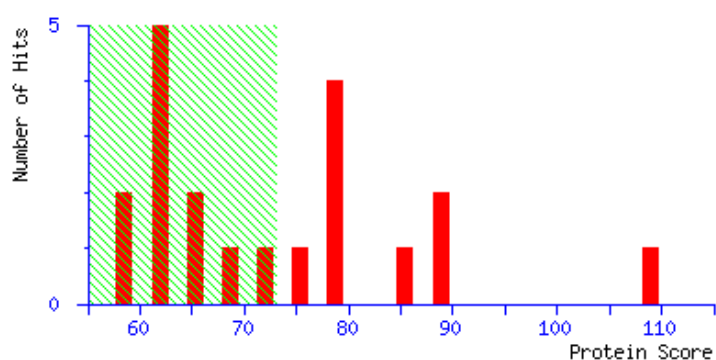

Matched peptide sequences: shown in **Bold Red**:

```
1  MASSKDRGTF  VYVAKLAEQA  ERYEEMVDSM  KKVANLDVEL  TVEERNLLSV
51  GYKNVIGARR  ASWRILSSIE  QKEETKGNDV  NAKRIKEYRQ  KVESELADIC
101 NDVMRVIDEH  LIPSATAGES  TVFYYKMKGD  YYRYLAEFKS  GNEKKEAADQ
151 SMKAYESATT  AAEAELPPTH  PIRLGLALNF  SVFYYEILNS  PERACHLAKQ
201 AFDEAISELD  TLNEESYKDS  TLIMQLLRDN  LTLWTSDIPE  EGEDSLKAND
251 TAKVGGGEDA  E
```

Spot No.: **78**

NCBI accession No.: **gi|115468882**

Species: *Oryza sativa Japonica Group*

PFF score: **[71]**

Protein name: **Os06g0608500**

Matched peptides No.: **[1]**

Sequence coverage %: **[6]**

Matched sequences: **R.LYEQQIEQLGNFQLR.I**

Calculated Mr: **24269**

Calculated pI: **4.84**

### Probability Based Mowse Score:

Ions score is  $-10 \cdot \log(P)$ , where P is the probability that the observed match is a random event.

Individual ions scores > 42 indicate peptides with significant homology.

Individual ions scores > 43 indicate identity or extensive homology ( $p < 0.05$ ).

Protein scores are derived from ions scores as a non-probabilistic basis for ranking protein hits.

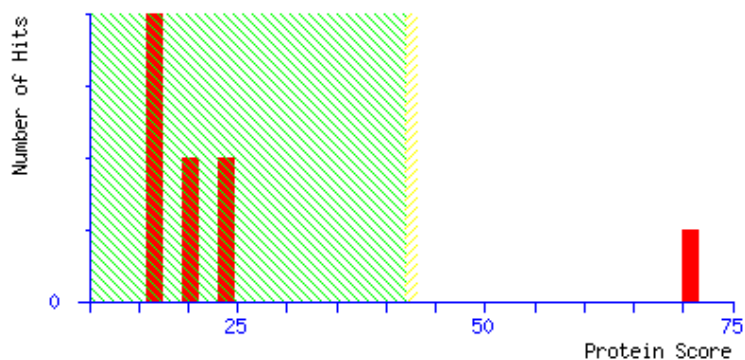

Matched peptide sequences: shown in **Bold Red**:

```
1  MSGVFGKVFQ  KSKAQSQATA  LASIDKLSET  LEMLEKKENL  LVKKANLEVE
51  KAKTFTKAKN  KRAAIQCLKR  KRLYEQQIEQ  LGNFQLRIHD  QMIMLEGAKA
101 TTETVDALRT  GASAMKAMHK  ATNIDDVDKT  MDEINDNMEN  MRQIQDLLSA
151 PIGAAADFDE  DELEAELADL  EGEELEAELL  APTTTAPTAP  VRVQQPTRPS
201 AQSSKTEDDE  LAALQAEMAM
```

Spot No.: **79**

NCBI accession No.: **gi|356532109** Species: *Glycine max*

PFF score: **[104]**

Protein name: **2,3-bisphosphoglycerate-independent  
phosphoglycerate mutase-like**

Matched peptides No.: **[3]** Sequence coverage %: **[7]**

Matched sequences: **K.ALEYENFDKFDR.V ;**

**K.ALEYENFDKFDR.V;**

**R.AHGTAVGLPTEDDMGNSEVGHNALGAGR.I + Oxidation (M)**

Calculated Mr: **61059**

Calculated pI: **5.51**

Probability Based Mowse Score:

Ions score is  $-10 \cdot \log(P)$ , where P is the probability that the observed match is a random event.

Individual ions scores  $> 45$  indicate identity or extensive homology ( $p < 0.05$ ).

Protein scores are derived from ions scores as a non-probabilistic basis for ranking protein hits.

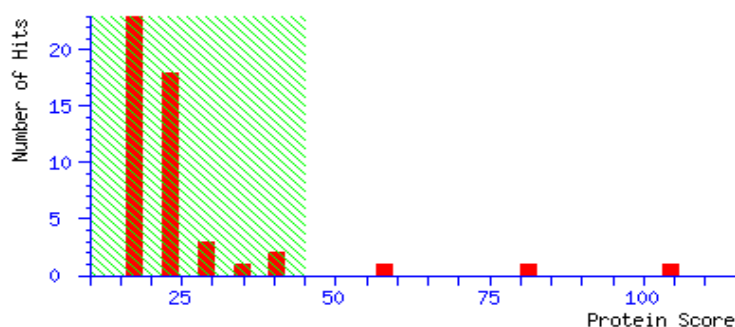

Matched peptide sequences: shown in **Bold Red**:

```
1  MGSTGFSWKL  ADHPKLPK GK  TVAVVLDGW  GEATPNEYNC  IHKAETPCMD
51  SLKKGAPERW  RLVRAHGTAV  GLPTEDDMGN  SEVGHNALGA  GRIFAQGAKL
101 VDLALASGKF  FEGGGFKYIK  ESFENGLHL  IGLSDGGVH  SRLDQLQLL
151 KGVSEKRVKR  VRVHILTDGR  DVLGSSVGF  VETLENDLAN  LREKGV DARI
201 ASGGGRMNVT  MDRYENDWNV  VKRGWDAQVL  GEAPYKFTNA  LEAVKKLRAE
251 PKANDQYLPP  FVIVDESGKP  VGPIVDGDAV  VTFNFRADRM  TMIAKALEYE
301 NFDKFDRVRF  PKIRYAGMLE  YDGELKLPSH  YLVSPPEIDR  TSGEYLVYNG
351 IRTFACSETV  KFGHVTFEWN  GNRSGYFNSE  LEEYVEIPSD  SGITFNEQPL
401 MKALQIAEKA  RDAILSGKFD  QVRVNL PNGD  MVGHTGDIEA  TVVACKAADA
451 AVKMILDAIE  QVGGIYV VTA  DHGNAEDMVK  RDKSGKPLL G  KDGKIQILTS
501 HTLEPVPIAI  GPGGLAPGVR  FRNDVPTGGL  ANVAATVMNL  HGFEAPSDYE
551 TTLVEVVDN
```



Spot No.: **80**

NCBI accession No.: [gi|224056489](#) Species: *Populus trichocarpa*

Protein name: **predicted protein**

Mascot score: **90**

Sequence coverage %: **32**

Matched peptides No.: **17**

Total peptides No.: **86**

Calculated Mr: **59210**

Calculated pI: **5.11**

Probability Based Mowse Score:

Protein score is  $-10 \cdot \log(P)$ , where P is the probability that the observed match is a random event. Protein scores greater than 73 are significant ( $p < 0.05$ ).

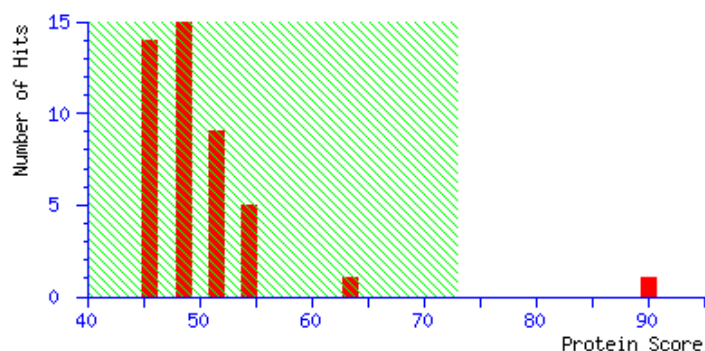

Matched peptide sequences: shown in **Bold Red**:

```
1  MEESERKQT LLSSLESAGI WIPDNVTSIG DLSPETFVSI CAQCVNLIDQ
51  TASLPTTLPD AAIDKLMCA DMGLAIKRLG FIGDMSYIKV IKPVTNCFVI
101 KLLYSEDDL HKLTRFLVER LTESTRPVKI AEVKDVNARG KTKEDGSDIG
151 GRLDLNHQRE KLADPSLHNA VPEAEDIPFI GLSRQNLGKD KLPAFFYGEL
201 FDEEGKSGRD LFGNEETAAA GDDKDVQKAI SIKEQPSMVI IEKEELRNEE
251 KVLTEEVTAKE TSELQHLEEE LELLKAAAEM AYGDQNSIDF CFEQLKGQVD
301 AKRCNITELK SQWDAFRMPL EDKRNLEES LYANIPGSQE KLQKLRELEH
351 EKQLVLSEIT KREEHSLKLS ADLEKQPKLP SRTSYIERIK EITKSSQKQD
401 ADIKRILKET RELQLESNSI QDRLHRTYAV LDEIVCREAK RDLVGRKAYR
451 LLTSLHDCFG QISEKILTTD RISREMLETE KKLAAMASRS LNVDKLQADL
501 DAIVKENECL ELRLAENP
```



Spot No.: **81**

NCBI accession No.: **gi|255552291** Species: *Ricinus communis*

PFF score: **[174]**

Protein name: **short chain dehydrogenase, putative**

Matched peptides No.: **[2]** Sequence coverage %: **[10]**

Matched sequences: **K.VALVTGGDSGIGR.A ;**

**K.DPIAIPTDVGFENCR.K**

Calculated Mr: **32148**

Calculated pI: **6.50**

Probability Based Mowse Score:

Ions score is  $-10 \cdot \log(P)$ , where P is the probability that the observed match is a random event.

Individual ions scores  $> 45$  indicate identity or extensive homology ( $p < 0.05$ ).

Protein scores are derived from ions scores as a non-probabilistic basis for ranking protein hits.

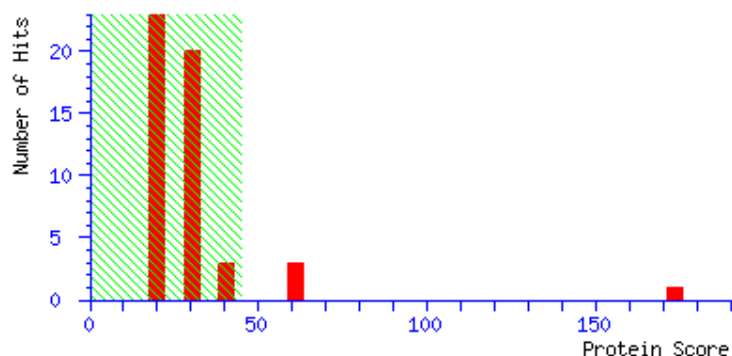

Matched peptide sequences: shown in **Bold Red**:

```
1  MATRRGYRFP  PQSQDKQPGK  EYLMHPLPEF  INPHYKPSNK  LQDKVALVTG
51 GDSGIGRAVS  YYFTLEGATV  AFTYVKGRED  KDKDHILKIL  HEVKAEGAKD
101 PLAIPTDVGF EENCRKVIDQ  IMSEYGKIDI  LVNNAGEAHY  STTIEDITDP
151 MLERVFRTNI  FGHEFMSRHA  LKHMKEGGCI  INTASVAAYA  GFSFMVDYSS
201 TKGAVVAFTR  SLALQLIDRG  IRVNAVAPGS  VWTPFQPSTL  SAEQVAQVGS
251 GVPMDRAAQP  YEIAPSFVFL  ASNDCSSYFT  GQVLHPNGMF
```

Spot No.: **82**

NCBI accession No.: **gi|2073448** Species: *Lotus japonicus*

Protein name: **glutamine synthetase**

**PMF** score: **91**

Sequence coverage %: **46**

Matched peptides No.: **13**

Total peptides No.: **89**

Calculated Mr: **39308**

Calculated pI: **5.49**

Probability Based Mowse Score:

Protein score is  $-10 \cdot \log(P)$ , where P is the probability that the observed match is a random event. Protein scores greater than 73 are significant ( $p < 0.05$ ).

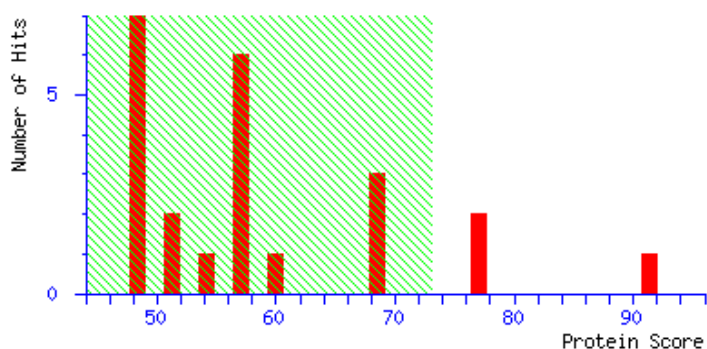

Matched peptide sequences: shown in **Bold Red**:

```
1  MSLLSDLINL NLSETTDKII AEYIWIGGSG LDMRTKARTL PGPVSDPSQL
51 PKWNYDGSST GQAPGEDSEV ILYPQAIFRD PFRRGSNILV ICDAYTPAGE
101 PIPTNKRHAA AKVFSHPDVV AEVWPYGIEQ EYTLLQKEVN WPVGPWPIGGF
151 PGPQGPYYCG IGADKAFGRD IVDAHYKACL YAGVNISGIN GEVMPGQWEF
201 QVGPSVGISA GDEVWVARYI LERITEIAGV VLSFDPKPIK GDWNGAGAHT
251 NYSTKTMRED GGYEVIKKAI DKLGLRHKEH IAAYGEGNER RLTGRHETAD
301 INTFLWGVAN RGASIRVGRD TEKEGKYFE DRRPASNMDP YVVTSMIADT
351 TILWKP
```

Spot No.: **83**

NCBI accession No.: **gi|192912956** Species: *Elaeis guineensis*

PFF score: **[204]**

Protein name: **aluminum-induced protein**

Matched peptides No.: **[2]** Sequence coverage %: **[9]**

Matched sequences: **K.TANEVIIVIEAYR.S** ;

**R.GPYPADKVVR.D**

Calculated Mr: **27466**

Calculated *pI*: **6.07**

Probability Based Mowse Score:

Ions score is  $-10 \cdot \log(P)$ , where P is the probability that the observed match is a random event.

Individual ions scores  $> 46$  indicate identity or extensive homology ( $p < 0.05$ ).

Protein scores are derived from ions scores as a non-probabilistic basis for ranking protein hits.

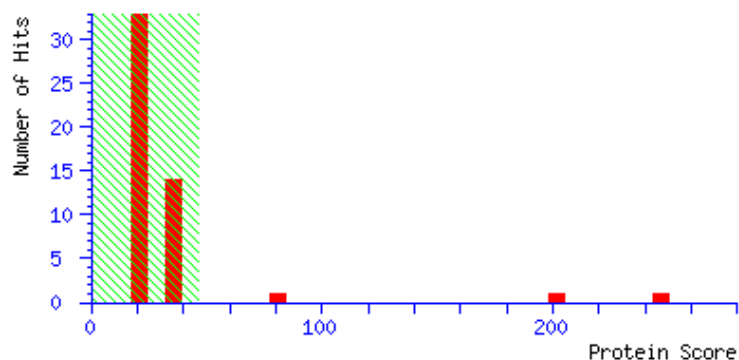

Matched peptide sequences: shown in **Bold Red**:

```
1 MLAVFDRTVA KCPEGLRND SGPGEKGVGG VASLVDHFSA TREGAVTIRL
51 GSSGAVAYTA EKQNLLLPRL FAAVDDIYCL FQGHENIAH LKQQYGLNKT
101 ANEVIIVIEA YRSLRDRGPY PADKVVRDLN GKFAFILFDC SAKSTFIAAD
151 ADGSVPFYWG TDSGSHLVLS DDVDVIKKGK GKSFAPFPKG CFFTTSGGLQ
201 SFEHPLNEVK LMPRVDSQGE VCGATYEIDA QTKKESMPR VGSAANWSSH
251 Y
```

Spot No.: 84

NCBI accession No.: gi|255559601 Species: *Ricinus communis*

PFF score: [254]

Protein name: **alpha-soluble nsf attachment protein, putative**

Matched peptides No.: [6] Sequence coverage %: [12]

Matched sequences: H EAAQAYVDAA HCYK ;

AIEIYEEIAR;

YQ DLDPTFSGTR

Calculated Mr: 32914

Calculated pI: 5.12

Probability Based Mowse Score:

Ions score is  $-10 \cdot \log(P)$ , where P is the probability that the observed match is a random event.

Individual ions scores  $> 45$  indicate identity or extensive homology ( $p < 0.05$ ).

Protein scores are derived from ions scores as a non-probabilistic basis for ranking protein hits.

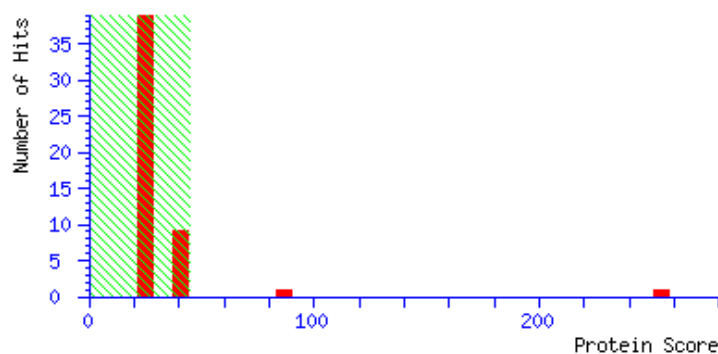

Matched peptide sequences: shown in **Bold Red**:

```
1  MSDQIAKGEE FEKKA EKLN GWGLFGSKYE DASDLFDKAA NSFKLAKSWD
51  RAGSTYVKLA NCHLKLD SKH EAAQAYVDAA HCYKKTTTNE AISCLGQAVE
101 MFCDIGRISM AARYYKEIAE LYESEANVEK AMDFYEKAAD FFQGEEVTTT
151 ANQCKQKVAQ FAAQLEQYQK AIEIYEEIAR HSLSNLLKY GVKGHLLNAG
201 ICHLCKGDVV SVTNALERYQ DLDPTFSGTR EYRLLADVAA AIDEEDVAKF
251 TDVVKEFDSM TPLDSWKTTL LLRVKEKLKA KELEEDDLT
```

Spot No.: 85

NCBI accession No.: [gi|224099853](#) Species: *Populus trichocarpa*

PFF score: [69] Protein name: putative protein

Matched peptides No.: [2] Sequence coverage %: [5]

Matched sequences: [S FEHPLNELKP VPR](#)

Calculated Mr: 27448

Calculated pI: 5.84

Probability Based Mowse Score:

Ions score is  $-10 \cdot \log(P)$ , where P is the probability that the observed match is a random event.

Individual ions scores > 45 indicate identity or extensive homology ( $p < 0.05$ ).

Protein scores are derived from ions scores as a non-probabilistic basis for ranking protein hits.

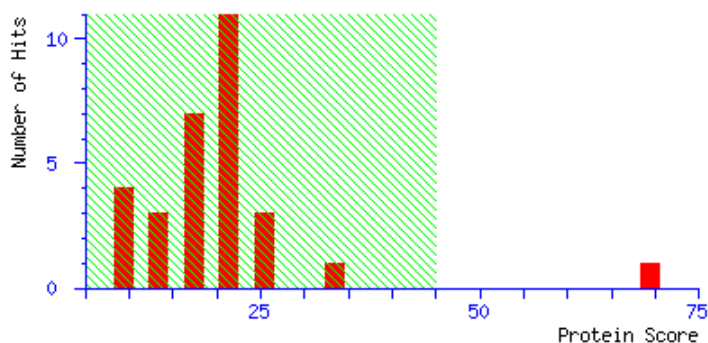

Matched peptide sequences: shown in **Bold Red**

```
1 MLAVFDNTVA KCPDALQSPH SAPASSALKD GFLANHFASQ HPGSVTVNLG
51 TSGLISHSVE KQNPFLPRLF AVVDDIFCLF QGHIDNVAVL KQQYGLNKTA
101 NEVIVVIEAY RTLRDRGPYP ADQVVKDIQG KFAFILDST SKATFFAADA
151 DGSVPFFWGA DSEGNLVLSD DVQIVQKCGC KSFAPFPKGC FFTTSGGLRS
201 FEHPLNELKP VPRVDSSGQV CGATFKVDAE TKKESVGMPR VDSSYNWSSN
251 Y
```

Spot No.: 86

NCBI accession No.: [gi|38122474](#) Species: *Hevea brasiliensis*

PFF score: [410] Protein name: rubber elongation factor

Matched peptides No.: [4] Sequence coverage %: [26]

Matched sequences: [YLDFVQAATVYAR](#) ;

[SGPFKPGVNTVESR](#);

[SVVRPVYNK](#) ;

[RVDAYVTVLDR](#)

Calculated Mr: **19570**

Calculated pI: **5.06**

Probability Based Mowse Score:

Ions score is  $-10 \cdot \log(P)$ , where P is the probability that the observed match is a random event.

Individual ions scores > 45 indicate identity or extensive homology ( $p < 0.05$ ).

Protein scores are derived from ions scores as a non-probabilistic basis for ranking protein hits.

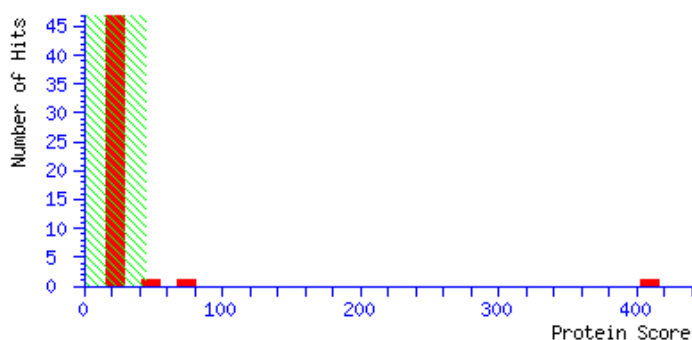

Matched peptide sequences: shown in **Bold Red**

```
1 MAEGEEVNI QEEANKGEEN PQEEANIQEE TNKGEENIQE EANIEEEANK
51 EEESLKYLDF VQAATVYARA SFSKLYLFAK DKSGPFKPGV NTVESRFSKSV
101 VRPVYNKFQP VPKVLFAD RRVDAYVTVL DRIVPPIVKR ASIQAYSVAP
151 GAALAVASYL PLHTKRLSKV LYGDG
```

Spot No.: 87

NCBI accession No.: [gi|38122474](#) Species: *Hevea brasiliensis*

PFF score: [226] Protein name: rubber elongation factor

Matched peptides No.: [4] Sequence coverage %: [26]

Matched sequences: [YLDFVQAATVYAR](#) ;

[SGPFKPGVNTVESR](#);

[SVVRPVYNK](#) ;

[RVDAYVTVLDR](#)

Calculated Mr: **19570**

Calculated pI: **5.06**

Probability Based Mowse Score:

Ions score is  $-10 \cdot \log(P)$ , where P is the probability that the observed match is a random event.

Individual ions scores > 46 indicate identity or extensive homology ( $p < 0.05$ ).

Protein scores are derived from ions scores as a non-probabilistic basis for ranking protein hits.

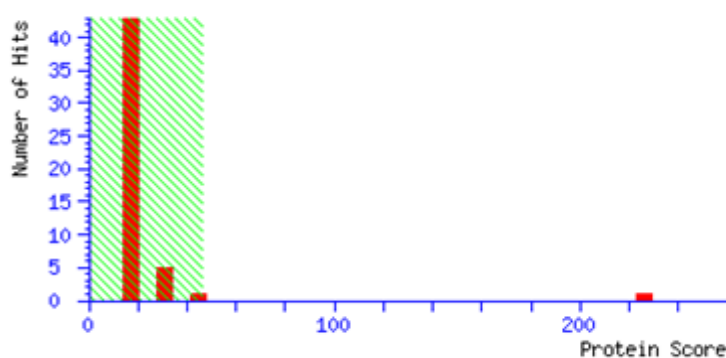

Matched peptide sequences: shown in **Bold Red**

```
1 MAEGEEEVNI QEEANKGEEN PQEENIQEE TNKGEENIQE EANIEEEANK
51 EEESLKYLDF VQAATVYARA SFSKLYLFAK DKSGPFKPGV NTVESRFKSV
101 VRPVYNKFQP VPNKVLKFAD RRVDAYVTVL DRIVPPIVKR ASIQAYSVAP
151 GAALAVASYL PLHTKRLSKV LYGDG
```

Spot No.: 88

NCBI accession No.: [gi|38122474](#) Species: *Hevea brasiliensis*

Protein name: rubber elongation factor

PMF score: 116

Sequence coverage %: 54

Matched peptides No.: 11

Total peptides No.: 60

Calculated Mr: 19570

Calculated pI: 5.06

Probability Based Mowse Score:

Protein score is  $-10 \cdot \log(P)$ , where P is the probability that the observed match is a random event. Protein scores greater than 73 are significant ( $p < 0.05$ ).

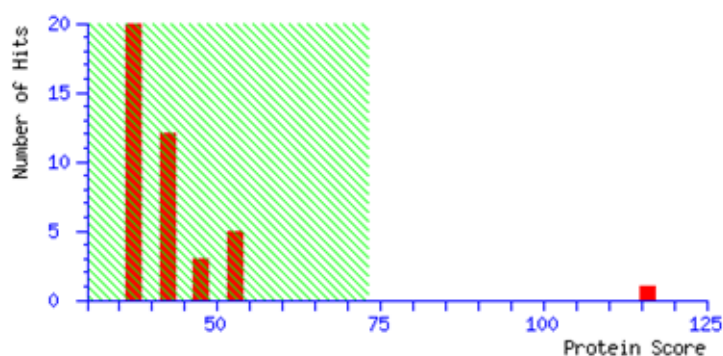

Matched peptide sequences: shown in **Bold Red**

```
1 MAEGEEEVNI QEEANKGEEN PQEEANIQEE TNKGEEENIQE EANIEEEANK
51 EEESLKYLDF VQAATVYARA SFSKLYLFAK DKSGPFKPGV NTVESRFSKV
101 VRPVYNKFQP VPNKVLKFAD RRVDAYVTVL DRIVPPIVKR ASIQAYSVAP
151 GAALAVASYL PLHTKRLSKV LYGDG
```



Spot No.: 88

NCBI accession No.: [gi|38122474](#) Species: *Hevea brasiliensis*

Protein name: rubber elongation factor

PMF score: 99

Sequence coverage %: 455

Matched peptides No.: 8

Total peptides No.: 39

Calculated Mr: 19570

Calculated pl: 5.06

Probability Based Mowse Score:

Protein score is  $-10 \cdot \log(P)$ , where P is the probability that the observed match is a random event.  
Protein scores greater than 73 are significant ( $p < 0.05$ ).

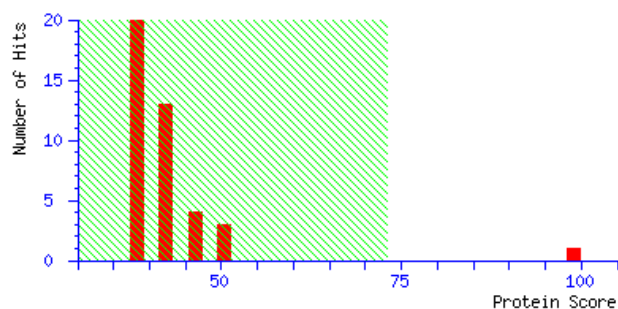

Matched peptide sequences: shown in **Bold Red**

```
1 MAEGEEEVNI QEEANKGEEN PQEEANIQEE TNKGEENIQE EANIEEEANK
51 EEESLKYLDF VQAATVYARA SFSKLYLFAK DKSGPFKPGV NTVESRFKSV
101 VRPVYNKFQP VPNKVLKFAD RRVDAYTVTL DRIVPPIVKR ASIQAYSVAP
151 GAALAVASYL PLHTKRLSKV LYGDG
```

Spot No.: 90

NCBI accession No.: [gi|334854634](#) Species: *Hevea brasiliensis*

PFF score: [496] Protein name: elicitor-responsive protein

Matched peptides No.: [3] Sequence coverage %: [59]

Matched sequences: [PLGTVEVLLVGAKGLENDFLNGVDPYVVLACR](#);

[GSEP EWNEKFSFEVSDGDTELTK](#);

[GEITVGLTFTPEVEMDNVVDGYDFRL](#)

Calculated Mr: **15249**

Calculated pI: **4.06**

Probability Based Mowse Score:

Ions score is  $-10 \cdot \log(P)$ , where P is the probability that the observed match is a random event.

Individual ions scores > 45 indicate identity or extensive homology ( $p < 0.05$ ).

Protein scores are derived from ions scores as a non-probabilistic basis for ranking protein hits.

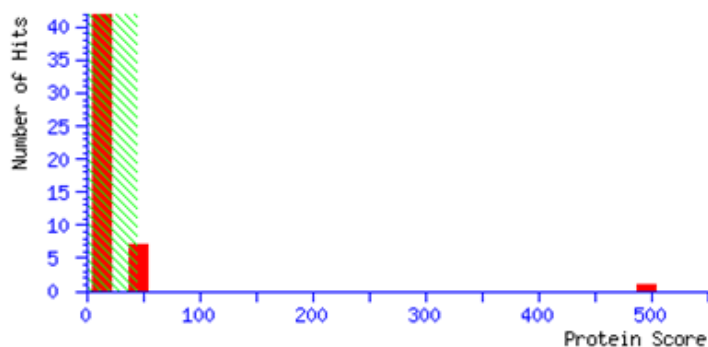

Matched peptide sequences: shown in **Bold Red**

1 **MPLGTVEVLL** **VGAKGLENTD** **FLNGVDPYVV** **LACRTQEQKS** **SVASGKGSEP**  
51 **EWNEKFSFEV** **SDGDTELTK** **IMDSVGAAD** **DFVGEATIPL** **EPLFLEGNLP**  
101 **STAYKVVKEQ** **EYKGEITVGL** **TFTPEVEMDN** **VGVDGYDFRL**

Spot No.: 91

NCBI accession No.: [gi|334854634](#) Species: *Hevea brasiliensis*

PFF score: [95]

Protein name: eukaryotic translation initiation factor 5A isoform VII

Matched peptides No.: [3] Sequence coverage %: [28]

Matched sequences: TYPQQAGTIR;

K LEDIVPSSHNC DVPHVTR ;

TKDDLRLPTDENLLS QIK

Calculated Mr: 17689

Calculated pI: 5.60

Probability Based Mowse Score:

Ions score is  $-10 \cdot \log(P)$ , where P is the probability that the observed match is a random event. Individual ions scores > 45 indicate identity or extensive homology ( $p < 0.05$ ). Protein scores are derived from ions scores as a non-probabilistic basis for ranking protein hits.

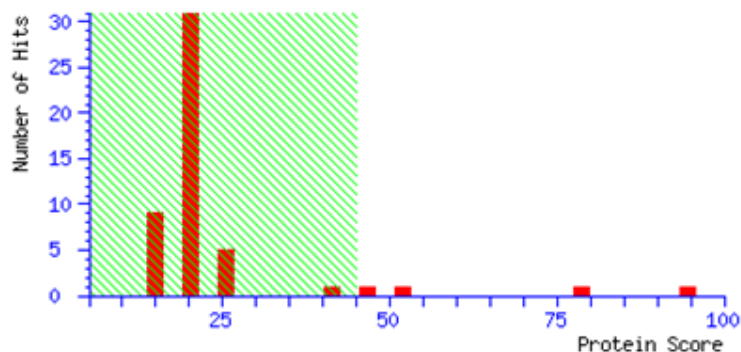

Matched peptide sequences: shown in **Bold Red**

```
1 MSDEEHHFES KADAGASKTY PQQAGTIRKN GYIVIKNRPC KVVDVSTSKT
51 GKHGHAKCHF VGIDIFNAK LEDIVPSSHNC DVPHVTRTD YQLIDISEDG
101 FVSLLTENGN TKDDLRLPTDENLLS QIKDG FAEGKDLVVT VMSSMGEEQI
151 CALKDIGPK
```

Spot No.: 92

NCBI accession No.: [gi|224144943](#) Species: *Populus trichocarpa*

PFF score: [180] Protein name: predicted protein

Matched peptides No.: [2] Sequence coverage %: [28]

Matched sequences: [VFEDNVLIRVLVVDGGGSLR](#);

[HVPITIG GTRISDGEWLYADTDGILISR](#)

Calculated Mr: 17971

Calculated pI: 5.39

Probability Based Mowse Score:

Ions score is  $-10 \cdot \log(P)$ , where P is the probability that the observed match is a random event.

Individual ions scores > 44 indicate identity or extensive homology ( $p < 0.05$ ).

Protein scores are derived from ions scores as a non-probabilistic basis for ranking protein hits.

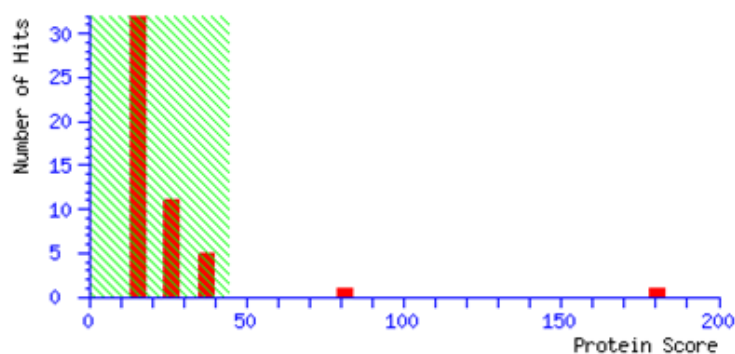

Matched peptide sequences: shown in **Bold Red**

```
1 MALVTIAEVC DANPQLIVSG ELRALQPIFQ IYGRRQVFSG PVVILKVFED
51 NVLIREFLEE KGNGRVLVD GGGSLRCAIL GGNPVVQAQN NGWAGIVVNG
101 CIRDVDEIMG CDIGVRALAS HPMKANKKGI GEKHVPITIG GTRISDGEWL
151 YADTDGILIS RTELAV
```

Spot No.: 93

NCBI accession No.: [gi|253760141](#)

Species: *Hevea brasiliensis*

Protein name: nucleoside diphosphate kinase 1

PMF score: 84

Sequence coverage %: 44

Matched peptides No.: 8

Total peptides No.: 76

Calculated Mr: 16338

Calculated pI: 6.85

Probability Based Mowse Score:

Protein score is  $-10 \cdot \log(P)$ , where P is the probability that the observed match is a random event. Protein scores greater than 73 are significant ( $p < 0.05$ ).

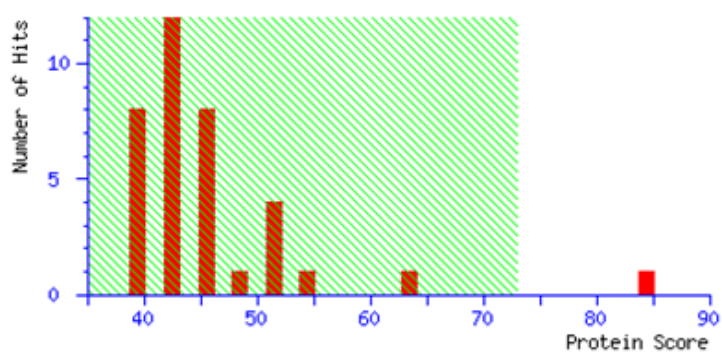

Matched peptide sequences: shown in **Bold red**:

```
1  MEQTFIMIKP  DGVQRGLVGE  IIGRFEKKGF  SLKGLKLITV  ERLFAERHYA
51  DLSAKPFFNG  LVEYIISGPV  VAMVWEGKNV  VTTGRKIIGA  TNPADSAPGT
101 IRGDYAIDIG  RNVIHGSDSV  ESARKEIALW  FPEGVSWSS  SLHPWIYE
```

Spot No.: 94

NCBI accession No.: [gi|123062](#)

Species: *Hevea brasiliensis*

PFF score: [96]

Protein name: [prohevein](#)

Matched peptides No.: [1] Sequence coverage %: [8]

Matched sequences: [IVDQ CSNGGLDLDV NVFR](#)

Calculated Mr: 22700

Calculated pI: 5.63

Probability Based Mowse Score:

Ions score is  $-10 \cdot \log(P)$ , where P is the probability that the observed match is a random event.

Individual ions scores > 44 indicate identity or extensive homology ( $p < 0.05$ ).

Protein scores are derived from ions scores as a non-probabilistic basis for ranking protein hits.

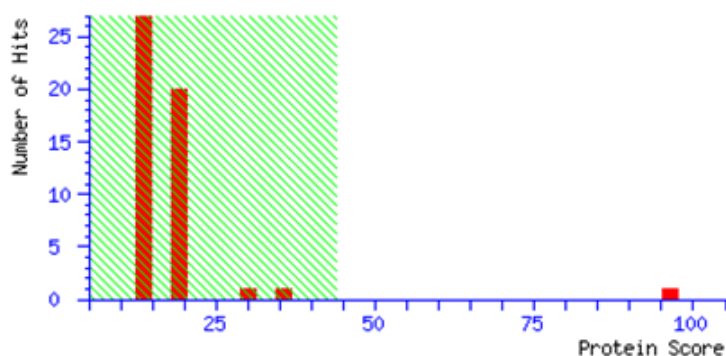

Matched peptide sequences: shown in **Bold Red**

```
1  MNIFIVLLC  LTGVAIAEQC  GRQAGGKLCF >NNLCCSQWGW  CGSTDEYCSP
51  DHNCQSNCKD  SGEQVGGGSA  SNVLATYHLY  NSQDHGWDLN  AASAYCSTWD
101 ANKPYSWRSK  YGWIAFCGPV  GAHQSSCGK  CLSVTNTGTG  AKTTVRIVDQ
151 CSNGGLDLDV NVFRQLDTDG  KGYERGHITV  NYQFVDCGDS  FNPLFSVMKS
201  SVIN
```

Spot No.: 95

NCBI accession No.: [gi|313586569](#) Species: *Hevea brasiliensis*

PFF score: [70] Protein name: hypothetical protein 19

Matched peptides No.: [1] Sequence coverage %: [5]

Matched sequences: [ADPNFFLTIR](#)

Calculated Mr: **20724** Calculated pI: **7.77**

Probability Based Mowse Score:

Ions score is  $-10 \cdot \log(P)$ , where P is the probability that the observed match is a random event. Individual ions scores  $> 45$  indicate identity or extensive homology ( $p < 0.05$ ). Protein scores are derived from ions scores as a non-probabilistic basis for ranking protein hits.

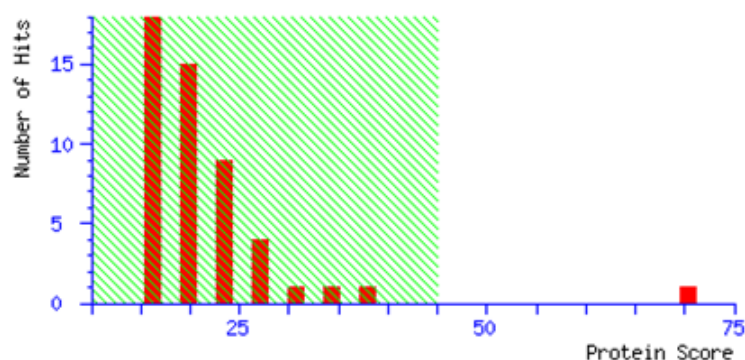

Matched peptide sequences: shown in **Bold Red**

```
1 MEELGSSHEK TESESSCRK PHLPSGSYLS KKPSYKVYCK ADPNFFLTIR
51 DGKVVLAAPPD PSDEFQHWYK DEKFSTMVKD EEGFPSFALV NKASGKALKH
101 SFGPTHFVLL TPYDPPDLEA SILWTESKDL GDGYRIVRML NNIRLNVEAL
151 RGDKKSGGVS NGTKVVLAYW NKGDHQKWRI APL
```



Spot No.: 96

NCBI accession No.: gi|313586569 Species: *Hevea brasiliensis*

Protein name: **hypothetical protein 19**

PMF score: **94**

Sequence coverage %: **62**

Matched peptides No.: **11**

Total peptides No.: **73**

Calculated Mr: **20724**

Calculated pI: **7.77**

Probability Based Mowse Score:

Protein score is  $-10 \cdot \log(P)$ , where P is the probability that the observed match is a random event. Protein scores greater than 73 are significant ( $p < 0.05$ ).

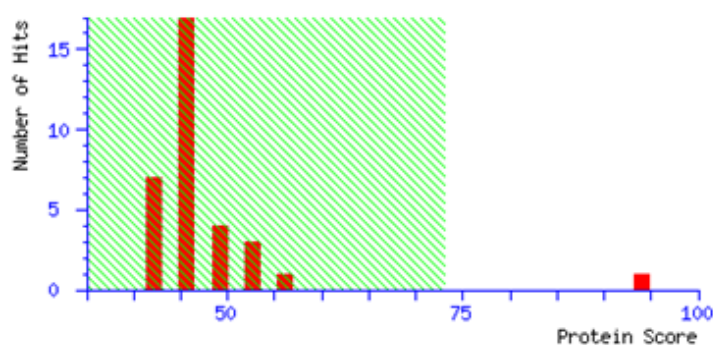

Matched peptide sequences: shown in **Bold Red**

```
1  MEELGSSHEK TESESSCRK  PHLPSGSYLS  KKPSYKVYCK  ADPNFLTIR
51  DGKVVLAPPD  PSDEFQHWYK  DEKFSTMVKD  EEGFPSFALV  NKASGKALKH
101 SFGPTHPVLL  TPYDPDDLEA  SILWTESKDL  GDGYRIVRML  NNIRLNVEAL
151 RGDKKSGGVS  NGTKVVLAYW  NKGDHQKWRI  APL
```



Spot No.: 97

NCBI accession No.: [gi|4835766](#) Species: *Arabidopsis thaliana*

Protein name: [Contains similarity to gb|AB017693](#) transfactor  
(WERBP-1) from *Nicotiana tabacum*

PMF score: **84**

Sequence coverage %: **27**

Matched peptides No.: **11**

Total peptides No.: **56**

Calculated Mr: **40677**

Calculated pI: **8.94**

Probability Based Mowse Score:

Protein score is  $-10 \cdot \log(P)$ , where P is the probability that the observed match is a random event.  
Protein scores greater than 73 are significant ( $p < 0.05$ ).

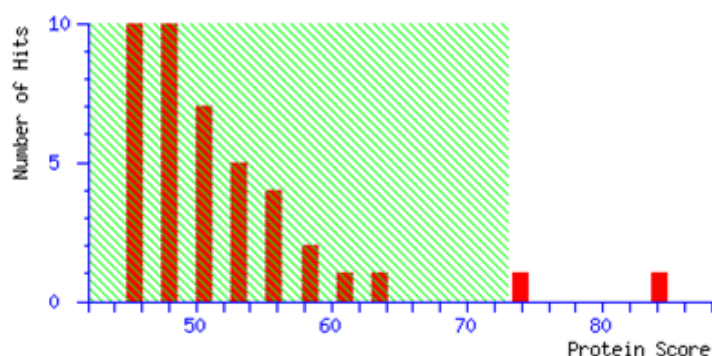

Matched peptide sequences: shown in **Bold Red**

```
1 MFHAKKPSSM NGSYENRAMC VQGDSGLVLT TDPKRLRWT VELHERFVDA
51 VAQLGGPKA TPKTIMRVMG VKGLTLYHLK SHLQKFRGK QPHKEYGDHS
101 TKEGSRASAM DIQRNVASSS GMMSRNMNDN SHQVGLIRMQ MEVQRRLHEQ
151 LEVQRHLQLR IEAQGKYMQS ILERACQTLA GENMAAATAA AAVGGGYKGN
201 LGSSSLSAAV GPPPHPLSFP PFQDLNIYGN TTDQVLDHHN FHHQNIENHF
251 TGNNAADTNI YLGKKRPNPN FGNDVRKGLL MWSQDHDLS ANQSIDDEHR
301 IQIQMATHVS TDLDSLSEIY ERKSGLSGDE GNNGGKLLER PSPRRSPLSP
351 MMNPNGLLIQ GRNSPFG
```

Spot No.: 98

NCBI accession No.: [gi|38122474](#) Species: *Hevea brasiliensis*

Protein name: [rubber elongation factor](#)

PMF score: 99

Sequence coverage %: 45

Matched peptides No.: 8

Total peptides No.: 39

Calculated Mr: 19570

Calculated pI: 5.06

Probability Based Mowse Score:

Protein score is  $-10 \cdot \log(P)$ , where P is the probability that the observed match is a random event. Protein scores greater than 73 are significant ( $p < 0.05$ ).

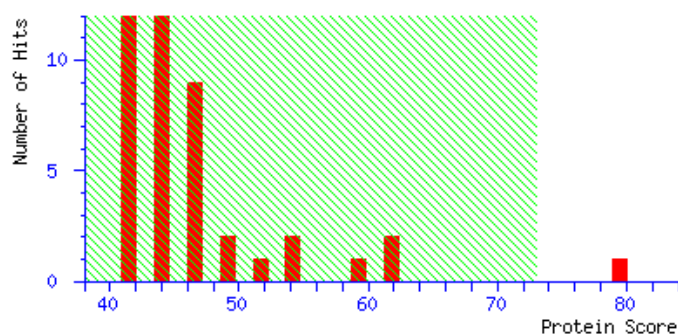

Matched peptide sequences: shown in **Bold red**:

```
1 MAEGEEEVNI QEEANKGEEN PQEENIQEE TNKGEENIQE EANIEEEANK
51 EEESLKYLDF VQAATVYARA SFSKLYLFAK DKSGPFKPGV NTVESRFKSV
101 VRPVYMKFQP VPNKVLKFAD RRVDAYVTVL DRIVPPIVKR ASIQAYSVAP
151 GAALAVASYL PLHTKRLSKV LYGDG
```

Spot No.: **99**

NCBI accession No.: **gi|3377751**

Species: *Mesembryanthemum crystallinum*

PFF score: **[73]**

Protein name: **glutathione S-transferase**

Matched peptides No.: **[1]**

Sequence coverage %: **[4]**

Matched sequences: **R.FWADFIDKK.L**

Calculated Mr: **26154**

Calculated pI: **5.71**

### Probability Based Mowse Score:

Ions score is  $-10 \cdot \log(P)$ , where P is the probability that the observed match is a random event. Individual ions scores  $> 44$  indicate identity or extensive homology ( $p < 0.05$ ). Protein scores are derived from ions scores as a non-probabilistic basis for ranking protein hits.

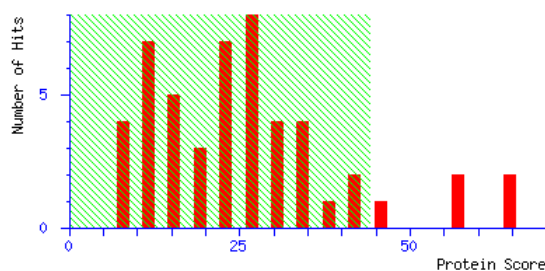

Matched peptide sequences: shown in **Bold Red**:

```
1  MGEEVILLDF  WPSMFGMLR  IALAEGVKH  ERKEEDLLIG  KSPLLLQLNP
51  VHKKIPVLVH  NGKPINESMI  AVQYIDEVWN  EKSPSLLPSD  PYQRAQARFW
101 ADFIDKKLYD  ECRKIYTTKE  AEIGEETYKG  FLEIIKVLEA  EVGEKSYFGG
151  DTFGFVDVAL  IPFYSWFYAL  EMLGKFNIET  ECPKLIAWAK  RCMERESVSK
201  SLPDRHKIYD  FITLQLRKAL  GVDQ
```

Spot No.: **100**

NCBI accession No.: **gi|1709761** Species: *Spinacia oleracea*

**PFF** score: **[49]**

Protein name: **Proteasome subunit alpha type-4**

Matched peptides No.: **[1]** Sequence coverage %: **[3]**

Matched sequences: **R.TTIFSPEGR.L**

Calculated Mr: **27545**

Calculated pI: **6.17**

Probability Based Mowse Score:

Ions score is  $-10 \cdot \log(P)$ , where P is the probability that the observed match is a random event. Individual ions scores  $> 44$  indicate identity or extensive homology ( $p < 0.05$ ). Protein scores are derived from ions scores as a non-probabilistic basis for ranking protein hits.

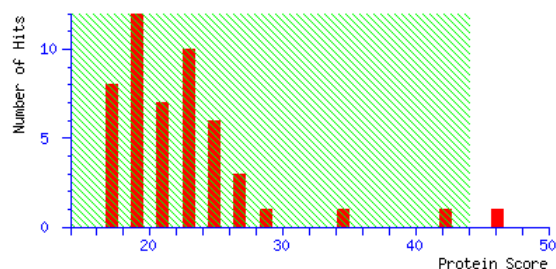

Matched peptide sequences: shown in **Bold Red**:

```
1 MSRRYDSRTT IFSPEGRLYQ VEYAMEAIGN AGSAIGILAK DGVVLIGEKK
51 VTSKLLQTST STEKMYKIDD HVACAVAGIM SDANILINTA RVQAQRYTFS
101 YQEPMPVEQL VQSLCDTKQG YTQFGGLRPF GVSFLFAGWD KNYGFQLYMS
151 DSPGNYGGWK ATAIGANNQA AQSMLKQDYK DDVTREDAVK LALKALSKTM
201 DSTSLTSEKL ELAEVYLLPS GKVYQVHSP ESLNRLTES GLTQPAETS
```

Spot No.: **101**

NCBI accession No.: **gi|27449248** Species: *Hevea brasiliensis*

**PFF** score: **[431]** Protein name: **ascorbate peroxidase**

Matched peptides No.: **[5]** Sequence coverage %: **[32]**

Matched sequences: **R.EDKPEPPPEGR.L;**

**R.IAWHSAGTYDANTK.T;**

**R.HAAEQAHAANGLDIAVRL;**

**K.YAADEDAFFADYAEAHVK.L;**

**K.TMGLSDKDIVVLSGGHTLGR.C + Oxidation (M)**

Calculated Mr: **27526**

Calculated *pI*: **5.78**

### Probability Based Mowse Score:

Ions score is  $-10 \cdot \log(P)$ , where P is the probability that the observed match is a random event. Individual ions scores  $> 44$  indicate identity or extensive homology ( $p < 0.05$ ). Protein scores are derived from ions scores as a non-probabilistic basis for ranking protein hits.

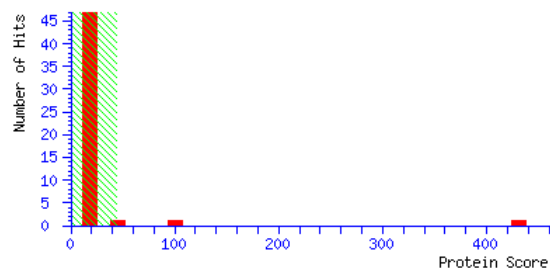

Matched peptide sequences: shown in **Bold Red**:

```
1  MTKNYPKVSE  EYQKAIDKAK  RKLRFIAEK  GCAPMLRIA  WHSAGTYDAN
51 TKTGGPFGTM  RHAAEQAHAA  NNGLDIAVRL  LEPIKQQFPI  LSYADFYQLA
101 GVVAVEITGG  PEIPFHPGRE  DKPEPPPEGR  LPNATKGADH  LREVFGKTMG
151 LSDKDIVVLS  GGHTLGRCHK  ERSFGDGPWT  ANPLIFDNSF  FTELLAGQKE
201 GLLQLPTDTV  LVTDPVFRPY  VEKYAADEDA  FFADYAEAHV  KLSELGFAEA
```

Spot No.: **102**

NCBI accession No.: **gi|211906460** Species: *Gossypium hirsutum*

**PFF** score: **[193]** Protein name: **triosephosphate isomerase**

Matched peptides No.: **[3]** Sequence coverage %: **[18]**

Matched sequences: **K.FFVGGNWK.C;**

**K.VIACIGETLEQR.E;**

**K.ELAAQPDVDGFLVGGASLKPEFIDIK.S**

Calculated Mr: **27472**

Calculated pI: **6.00**

### Probability Based Mowse Score:

Ions score is  $-10 \cdot \log(P)$ , where P is the probability that the observed match is a random event. Individual ions scores  $> 45$  indicate identity or extensive homology ( $p < 0.05$ ). Protein scores are derived from ions scores as a non-probabilistic basis for ranking protein hits.

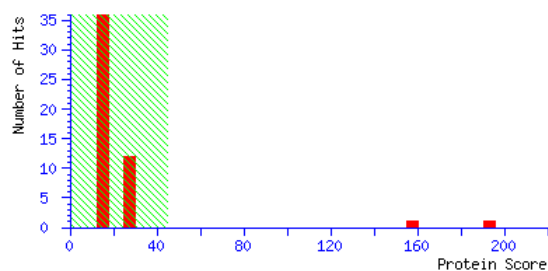

Matched peptide sequences: shown in **Bold Red**:

```
1 MGRKFFVGGN WKCNGTTEEV NKIVSTLNAG EVPSQDVVEV VVSPPEVFLP
51 LVKTSLRPDF HVAAQNCWVK KGGAFTGEVS AEMLVNLSIP WVIIGHSERR
101 LILKESNEFV ADKVAYALAQ GLKVIACIGE TLEQREAGST VAVVAEQTKA
151 IAAKISNWID VVLAYEPVWA IGTGKVATPA QAQEVHCELR KWLQANVSPE
201 VAASTRIIYG GSVTAANCE LAAQPDVDGF LVGGASLKPE FIDIKSAEV
251 KKNA
```

Spot No.: 103

NCBI accession No.: gi|38122474 Species: *Hevea Brasiliensis*

Protein name: rubber elongation factor

PMF score: 125

Sequence coverage %: 68

Matched peptides No.: 11

Total peptides No.: 50

Calculated Mr: 19570

Calculated pI: 5.06

Probability Based Mowse Score:

Protein score is  $-10 \cdot \log(P)$ , where P is the probability that the observed match is a random event. Protein scores greater than 73 are significant ( $p < 0.05$ ).

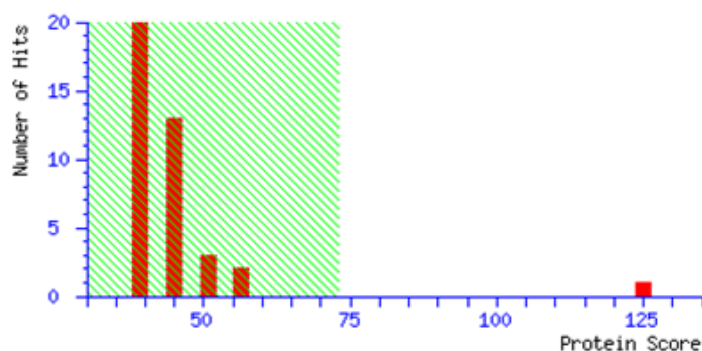

Matched peptide sequences: shown in **Bold Red**

1 MAEGEEEVNI QEEANKGEEN PQEEANIQEE TNKGEENIQE EANIEEEANK  
51 EEESLKYLDF VQAATVYARA SFSKLYLFAK DKSGPFKPGV NTVESRFKSV  
101 VRPVYNKFQP VPNKVLKPAD RRVDAYVTVL DRIVPPIVKR ASIQAYSVAP  
151 GAALAVASYL PLHTKRLSKV LYGDG

Spot No.: 104

NCBI accession No.: gi|3451147 Species: *Hevea Brasiliensis*

Protein name: chitinase

PMF score: 135

Sequence coverage %: 66

Matched peptides No.: 19

Total peptides No.: 77

Calculated Mr: 34138

Calculated pI: 8.72

Probability Based Mowse Score:

Protein score is  $-10 \cdot \log(P)$ , where P is the probability that the observed match is a random event. Protein scores greater than 73 are significant ( $p < 0.05$ ).

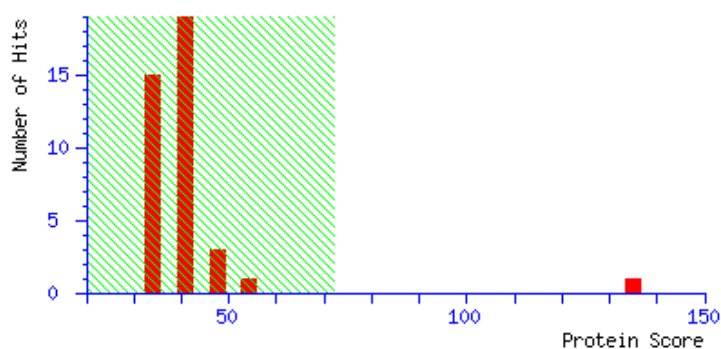

Matched peptide sequences: shown in **Bold Red**

```
1  MAKRTQAILL  LLLAISLIMS  SSHVDGGGIA  IYWGQNGNEG  TLTQTCSTRK
51  YSYVNIAFLN  KFGNGQTPQI  NLAGHCNPAA  GGCTIVSNGI  RSCQIQGIKV
101  MLSLGGGIGS  YTLASQADAK  NVADYLWNNF  LGGKSSSRPL  GDAVLDGIDF
151  DIEHGSTLYW  DDLARYLSAY  SKQGKRVYLT  AAPQCFFPDR  YLGTALNTGL
201  FDYVWVQFYN  NPPCQYSSGN  INNIINSWNR  WTTSINAGKI  FLGLPAAPEA
251  AGSGYVPPDV  LISRILPEIK  KSPKYGGVML  WSKFYDDKNG  YSSSIRDSVL
301  FLHSEKMTV  L
```



Spot No.:105

NCBI accession No.: [gij157831407](#) Species: *Hevea brasiliensis*

Protein name: [Chain A, Crystal Structures Of Hevamine](#)

PMF score: 93

Sequence coverage %:51

Matched peptides No.: 13

Total peptides No.: 76

Calculated Mr: 29874

Calculated pI: 8.44

Probability Based Mowse Score:

Protein score is  $-10 \cdot \log(P)$ , where P is the probability that the observed match is a random event. Protein scores greater than 73 are significant ( $p < 0.05$ ).

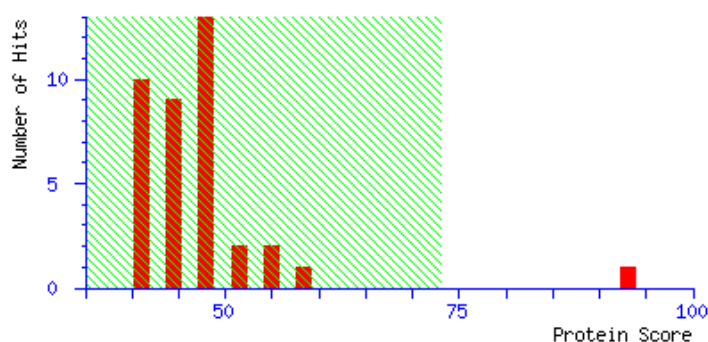

Matched peptide sequences: shown in **Bold red**:

```
1  GGIAIYWGQN  GNEGTLTQTC  STRKYSYVNI  AFLNKFGNGQ  TPQINLAGHC
51  NPAAGGCTIV  SNGIRSCQIQ  GIKVMSLGG  GIGSYTLASQ  ADARNVADYL
101 WNNFLGGKSS  SRPLGDAVLD  GIDFDIEHGS  TLYWDDLARY  LSAYSKQGKK
151 VYLTAAPQCP  FPDRYLGTAL  NTGLFDYVWV  QFYNNPPCQY  SSGNINNIIN
201  SWNRWTTTIN  AGKIFLGLPA  APEAAGSGYV  PPDVLSRIL  PEIKKSPKYG
251 GVMLWSKFYD  DKNGYSSSIL  DSV
```

Spot No.:106

NCBI accession No.: [gij157831407](#) Species: *Hevea brasiliensis*

Protein name: Chain A, Crystal Structures Of Hevamine

PMF score: 99

Sequence coverage %:42

Matched peptides No.: 12

Total peptides No.: 47

Calculated Mr: 29874

Calculated pI: 8.44

Probability Based Mowse Score:

Protein score is  $-10 \cdot \log(P)$ , where P is the probability that the observed match is a random event. Protein scores greater than 73 are significant ( $p < 0.05$ ).

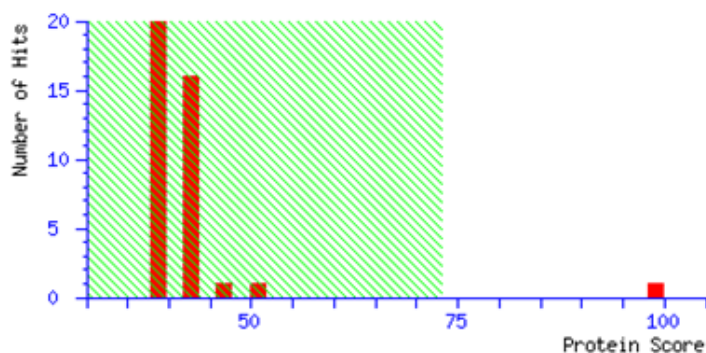

Matched peptide sequences: shown in **Bold Red**

```
1  GGIAIYWGQN  GNEGTLTQTC  STRKYSYVNI  AFLNKFGNGQ  TPQINLAGHC
51  NPAAGGCTIV  SNGIRSCQIQ  GIKVMLSLGG  GIGSYTLASQ  ADAKNVADYL
101 WNNFLGGKSS  SRPLGDAVLD  GIDFDIHGS  TLYWDDLARY  LSAYSKQGKK
151 VYLTAAPQCP  FPDRYLGTAL  NTGLFDYVWV  QFYNNPPCQY  SSGNINNIIN
201 SWNRWTTSIN  AGKIFLGLPA  APEAAGSGYV  PPDVLISRIL  PEIKKSPKYG
251 GVMLWSKFYD  DKNGYSSSIL  DSV
```

Spot No.:107

NCBI accession No.: [gi|3451147](#) Species: *Hevea Brasiliensis*

Protein name: [chitinase](#)

PMF score: **83**

Sequence coverage %: **48**

Matched peptides No.: **12**

Total peptides No.: **81**

Calculated Mr: **34138**

Calculated pI: **8.72**

Probability Based Mowse Score:

Protein score is  $-10 \cdot \log(P)$ , where P is the probability that the observed match is a random event. Protein scores greater than 73 are significant ( $p < 0.05$ ).

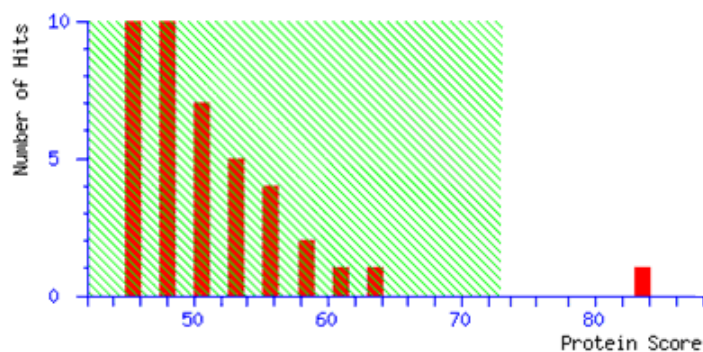

Matched peptide sequences: shown in **Bold Red**

```
1  MAKRTQAILL  LLLAISLIMS  SSHVDGGGIA  IYWGQNGNEG  TLTQTCSTRK
51  YSYVNIAFLN  KFGNGQTPQI  NLAGHCNPAA  GGCTIVSNGI  RSCQIQGIKV
101 MLSLGGGIGS  YTLASQADAK  NVADYLWNNF  LGGKSSSRPL  GDAVLGDIDF
151 DIEHGSTLYW  DDLARYLSAY  SKQGKRVYLT  AAPQCPFDR   YLGALNTGL
201 FDYVWVQFYN  NPPCQYSSGN  INNIINSWNR  WTTSINAGKI  FLGLPAAPEA
251 AGSGYVPPDV  LISRILPEIK  KSPKYGGVML  WSKFYDDRNG  YSSSIRDSVL
301 FLHSEKMTV  L
```

Spot No.: **108**

NCBI accession No.: **gi|2493895** Species: *Citrullus lanatus*

**PFF** score: **[89]**

Protein name: **cysteine synthase**

Matched peptides No.: **[1]** Sequence coverage %: **[ ]**

Matched sequences: **K.EGLLVGISSGAAAAAIR.I**

Calculated Mr: **34495**

Calculated pI: **6.26**

Probability Based Mowse Score:

Ions score is  $-10 \cdot \log(P)$ , where P is the probability that the observed match is a random event. Individual ions scores > 41 indicate identity or extensive homology ( $p < 0.05$ ). Protein scores are derived from ions scores as a non-probabilistic basis for ranking protein hits.

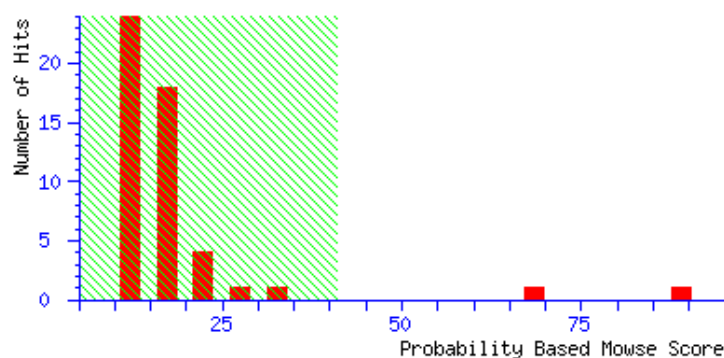

Matched peptide sequences: shown in **Bold Red**:

```
1 MADAKSTIAK DVTELIGHTP LVYLNRVVDG CVARVAAKLE MMEPCSSVKD RIGYSMISDA
61 ENKGLITPGE SVLIEPTSGN TGIGLAFIAA AKGYRLIICM PASMSLEERT ILRAFGAELV
121 LTDPARGMKG AVQKAEEIKA KTPNSYILQQ FENPANPKIH YETTGPDIWR GSGGKIDALV
181 SGIGTGGTVT GAGKYLKEQN PNIKLYGVEP VESAILSGGK PGPHKIQQIG AGFIPGVLDV
241 NLLDEVIQVS SEESIETAKL LALKEGLLVG ISSGAAAAAA IRIAKRPENA GKLVAVFPPS
301 FGERYLSTVL FESVKRETN MVFEP
```

Spot No.: **109**

NCBI accession No.: [gi|114199044](#) Species: *Malus x domestica*

PFF score: **[163]**

Protein name: [caffeic acid O-methyltransferase](#)

Matched peptides No.: **[2]** Sequence coverage %: **[13]**

Matched sequences: [R.TEKEFEALAK.G](#);

[K.AYGMTAFEYHGTDPR.F](#);

[K.AYGMTAFEYHGTDPR.F + Oxidation \(M\)](#);

[K.WICHDWSDEHCLK.F](#)

Calculated Mr: **39811**

Calculated pI: **5.39**

Probability Based Mowse Score:

Ions score is  $-10 \cdot \log(P)$ , where P is the probability that the observed match is a random event. Individual ions scores  $> 44$  indicate identity or extensive homology ( $p < 0.05$ ). Protein scores are derived from ions scores as a non-probabilistic basis for ranking protein hits.

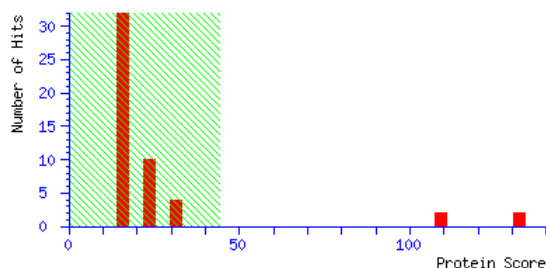

Matched peptide sequences: shown in **Bold Red**:

```
1  MGSTSESQSN  SLTHTDEEAF  LFAMQLCSAS  VLPMLKSAV  ELDLLELMAK
51  AGPGAAISPS  ELAAQLSTQN  PEAPVMLDRM  LRLLASYSVL  NCTLRLPDS
101 SVERLYSLAP  VCKYLTKNAD  GVSVAPLLLM  NQDKVLMESW  YHLKDAVLDG
151 GIPFNKAYGM  TAFEYHGTDP  RFNKVFNRGM  SDHSTMSMKK  ILEDYKGFEG
201 LNSIVDVGGG  TGATVNMIVS  KYPSIKGINF  DLPHVIGDAP  TYPGVEHVGG
251 DMFASVPKAD  AIFMKWICHD  WSDEHCLKFL  KNCYEALPAN  GKVIIAECIL
301 PEAPDTSLAT  KNTVHVDIVM  LAHNPPGKER  TEKEFEALAK  GAGFTGFARL
351 VALTTLGSWN  STSN
```

Spot No.: 110

NCBI accession No.: [gi|14423688](#)

Species: *Hevea brasiliensis*

Protein name: [Enolase 1](#)

PMF score: 158

Sequence coverage %: 53

Matched peptides No.: 18

Total peptides No.: 56

Calculated Mr: 48028

Calculated pI: 5.57

Probability Based Mowse Score:

Protein score is  $-10 \cdot \log(P)$ , where P is the probability that the observed match is a random event. Protein scores greater than 73 are significant ( $p < 0.05$ ).

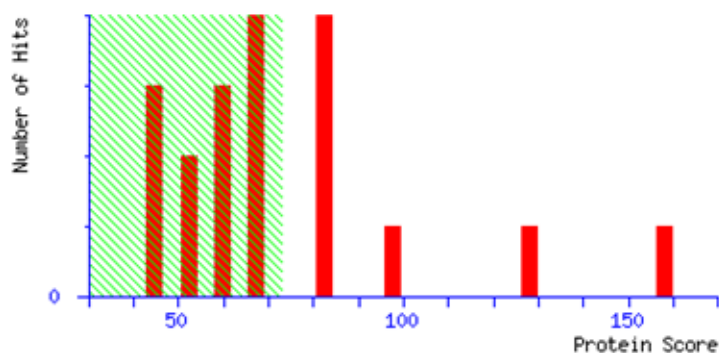

Matched peptide sequences: shown in **Bold red**

```
1 MAITIVSVRA RQIFDSRGNP TVEADVKLSD GYLARAAVPS GASTGIYEAL
51 ELRDGGSDYL GKGVSKAVEN VNIIIGPALV GKDPTDQVGI DNFMVQQLDG
101 TVNEWGWCKQ KLGANAILAV SLAVCKAGAH VKGIPLYEHI ANLAGNKNLV
151 LPVPAFNVIN GGSHAGNKLA MQEFMILPVG ASSFKEAMKM GAEVYHHLKS
201 VIKKKYGQDA TNVGDEGGFA PNIQENKEGL ELLKTAIAKA GYTGKVVIGM
251 DVAASEFYGS DQTYDLNFKE ENNGSQKIS GEALKDLYKS FVAEYPIVSI
301 EDPFDQDDWA HYAKLTSEIG EKVQIVGDDL LVTNPKRVEK AIKEKACNAL
351 LLKVNQIGSV TESIEAVKMS KRAGWGMAS HRSGETEDTF IADLSVGLAT
401 GQIKTGAPCR SERLAKYNQL LRIEEELGSE AVYAGANFRK PVEPY
```

Spot No.: 111

NCBI accession No.: [gi|14423688](#)

Species: *Hevea brasiliensis*

Protein name: [Enolase 1](#)

PMF score: 175

Sequence coverage %: 59

Matched peptides No.: 25

Total peptides No.: 76

Calculated Mr: 48028

Calculated pI: 5.57

Probability Based Mowse Score:

Protein score is  $-10 \cdot \log(P)$ , where P is the probability that the observed match is a random event. Protein scores greater than 73 are significant ( $p < 0.05$ ).

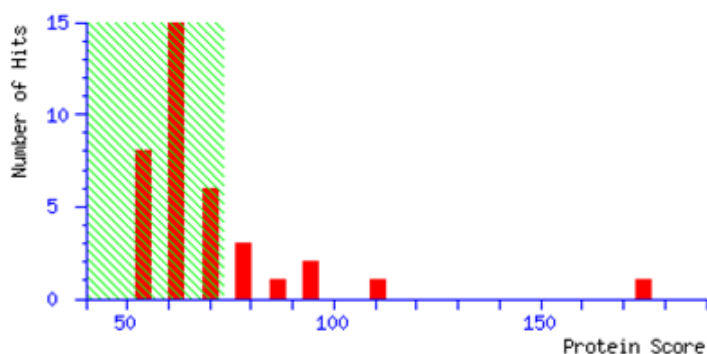

Matched peptide sequences: shown in **Bold red**

```
1  MAITIVSVRA  RQIFDSRGNP  TVEADVKLSD  GYLARAAVPS  GASTGIYEAL
51  ELRDGGSDDL  GKGVS KAVEN  VNIIIGPALV  GKDPTDQVGI  DNFMVQQLDG
101 TVNEGWCKQ  KLGANAILAV  SLAVCKAGAH  VKGIPLYEHI  ANLAGNKNLV
151 LPVPAFNVIN  GGSHAGNKLA  MQEFMILPVG  ASSFKRAMKM  GAEVYHHLKS
201 VIKKRYGQDA  TNVGDEGGFA  PNIQENKEGL  ELLKTAIAKA  GYTGVVIGM
251 DVAASEFYGS  DQTYDLNFKE  ENNNGSQKIS  GEALKDLYKS  FVAEYPIVSI
301 EDPFDQDDWA  HYAKLTSEIG  EKVQIVGDDL  LVTNPKRVEK  AIKEKACNAL
351 LLKVNQIGSV  TESIEAVKMS  KRAGWGMAS  HRSGETEDTF  IADLSVGLAT
401 GQIKTGAPCR  SERLAKYNQL  LRIIEELGSE  AVYAGANFRK  PVEPY
```



Spot No.: 112

NCBI accession No.: [gi|226897734](#) Species: *Thalictrum flavum*

Protein name: [norcoclaurine 6-O-methyltransferase](#)

PMF score: 85

Sequence coverage %: 45

Matched peptides No.:9

Total peptides No.:100

Calculated Mr: 25178

Calculated pI:6.05

Probability Based Mowse Score:

Protein score is  $-10 \cdot \log(P)$ , where P is the probability that the observed match is a random event. Protein scores greater than 73 are significant ( $p < 0.05$ ).

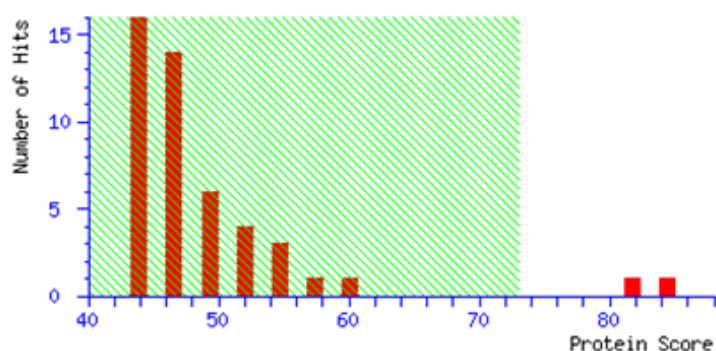

Matched peptide sequences: shown in **Bold red**:

```
1  MEMINKENLS  SQAKLWNFIY  GFADSLVLKS  AVQLDLANII  HNHGSPMTLS
51  ELSLHLPSQP  VNQDALYRVL  RYLVHMKLFT  KSSIDGELRY  GLAPPAKFLV
101 KGWDKCMLGA  ILTITDKDFM  APWHYLKEGI  LNDGSTSTAF  EKALGTNIWD
151 YMAEHPEKNQ  LFNEGMANDT  RLIMSALVKE  CSSMFDGITT  IVDVGGGTGT
201 AVRNIAKAFP  HIKCTVYDLP  HVIAD
```



Spot No.: **113**

NCBI accession No.: **gi|255565071** Species: *Ricinus communis*

PFF score: **[51]**

Protein name: **conserved hypothetical protein**

Matched peptides No.: **[2]** Sequence coverage %: **[2]**

Matched sequences: **R.LQVEELVFER.S; R.LQVEELVFER.S**

Calculated Mr: **54103**

Calculated pI: **5.53**

Probability Based Mowse Score:

Ions score is  $-10 \cdot \log(P)$ , where P is the probability that the observed match is a random event. Individual ions scores  $> 45$  indicate identity or extensive homology ( $p < 0.05$ ). Protein scores are derived from ions scores as a non-probabilistic basis for ranking protein hits.

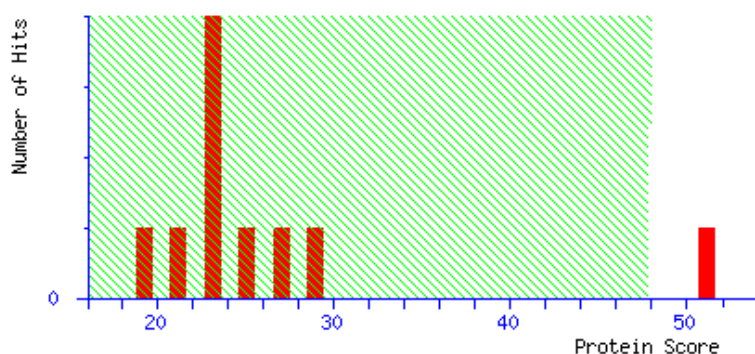

Matched peptide sequences: shown in **Bold Red**:

```
1  MAPMLPKSVA  IRSEFSRGYA  YYMAENEAVR  GFIRCEGENI  LNPYVKIEVE
51  TAQIDSKFVH  LRFSHNKYW  GRSGPGFTQD  DYWVSATSDQ  PEEDTSKWSC
101  TLFEPIFDHG  FLFLRHVQTG  GRVRTDGPIG  ATGPVSRLLL  YFRNYDNVPY
151  LDFTFFDLGT  LCILPKRVAF  RGYNDMYLKA  EWIERHEYLQ  FSSDDVNEKA
201  AGYEITMMPD  GHVRLRSNFF  NKFWRRSPNW  IWADSTDTVG  SDRDTLFWPV
251  KVNDDTIALR  NAGNNRFCSS  LTAERKTDCL  NAAVATITRE  ARLQVEELVF
301  ERSSIFNVRFL  MEYARIFDER  ATVAGWGSAA  NQSEEAATLS  ITVGYEDTTS
351  FTFSNSLAIT  AGVTVGITTG  LPRIAEGKIE  ISTEVINTLE  WNRTTSETRT
401  ASATYLANVP  ARSRIRIDYV  ATRGTCNIPF  SYTQRDRLSH  DGSFATTQHV
451  DGVYTGVNYY  SFHFEQPQIV  PL
```

Spot No.: **114**

NCBI accession No.: **gi|1346735** Species: *Ricinus communis*

PFF score: **[96]**

Protein name: **2,3-bisphosphoglycerate-independent  
phosphoglycerate mutase**

Matched peptides No.: **[1]** Sequence coverage %: **[2]**

Matched sequences: **K.LPSHYLVSPPEIER.T**

Calculated Mr: **57374**

Calculated pI: **5.60**

Probability Based Mowse Score:

Ions score is  $-10 \cdot \log(P)$ , where P is the probability that the observed match is a random event.  
Individual ions scores  $> 45$  indicate identity or extensive homology ( $p < 0.05$ ).  
Protein scores are derived from ions scores as a non-probabilistic basis for ranking protein hits.

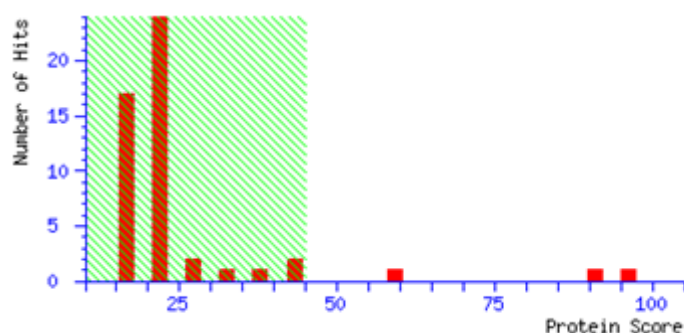

Matched peptide sequences: shown in **Bold Red**:

```
1  GEFTWKLADH  PKLPRGKTIA  MVVLDGWGEA  KPDQYNCIHV  AETPTMDSFK
51  KTAPERWRLI  KAHGTAVGLP  TEDDMGNSEV  GHNALGAGRI  YAQGAKLVDL
101 ALASGKIYEG  EGFKYVKECF  DKGTLHLIGL  LSDGGVHSRL  DQLQLLLKGA
151 AEHGAKRIRV  HVLTDRDVI  DGTSVGFAET  LEKDLENLRE  KGVDAQVASG
201 GGRMYVTMDR  YENDWNVVKR  GWDAQVLGEA  PYKFKSAVEA  IKKLREEPKA
251 NDQYLPPFVI  VDENGKPVGP  IVDGDAVVTI  NFRADRMVML  AKALEYENFD
301 TFDVRVFPKI  HYAGMLQYDG  ELKLPSHYLV SPPEIERTTSG  EYLVHNGVHT
351 FACSETVKFG  HVTFFWNGNR  SGYFNPEMEE  YVEIPSDVGI  TFNVQPKMKA
401 IEIAEKARDA  ILSGKFQQVR  VNIPNGDMVG  HTGDVEATVV  GCKAADEAVK
451 MIIDAIEQVG  GIYVVTADHG  NAEDMVKRDK  SGKPMADKSG  KIQILTSHTL
501 QVPVIAIGGP  GLTPGVRFRS  DIPTGGLANV  AATVMNLHGF  EAPSDYEPTL
551 IEAVDN
```

Spot No.: 115

NCBI accession No.: [gi|255565836](#) Species: *Ricinus communis*

Protein name: eukaryotic translation elongation factor, putative

PMF score: 141

Sequence coverage %: 40

Matched peptides No.:36

Total peptides No.:121

Calculated Mr: 94981

Calculated pI:5.87

Probability Based Mowse Score:

Protein score is  $-10 \cdot \log(P)$ , where P is the probability that the observed match is a random event. Protein scores greater than 73 are significant ( $p < 0.05$ ).

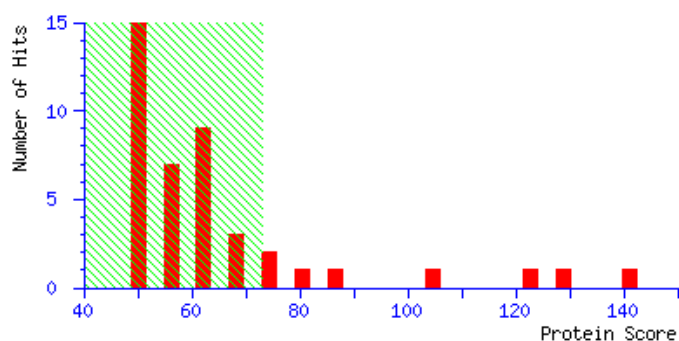

Matched peptide sequences: shown in **Bold red**:

```
1  MVKFTAEELR  RIMDYKHNIR  NMSVIAHVDH  GKSTLTDSLV  AAAGIIAQEV
51  AGDVRMTDTR  QDEAERGITI  KSTGISLYYE  MTDEALKSFK  GERQGNEYLI
101 NLIDSPGHVD  FSSEVTAALR  ITDGALVVVD  CIEGVCVQTE  TVLRQALGER
151 IRPVLTVNKM  DRCFLELQVD  GEEAYQTFSR  VIENANVIMA  TYEDPLLGDC
201 QVYPEKGTVA  FSAGLHGWAF  TLTNFARMYA  SKFGVDESKM  MERLWGENFF
251 DPATKKWTSK  NTGSPTCKRG  FVQFCYEPIK  QIINTCMNDQ  KDKLWPMLQK
301 LGVTMKSDEK  ELMGKALMKR  VMQTWLPASS  ALLEMMIFHL  PSPAKAQRYR
351 VENLYEGPLD  DPYATAIRNC  DPEGPLMLYV  SKMIPASDKG  RFFAFGRVFA
401 GKVSTGLKVR  IMGPNYVPGE  KKDLYVKSVQ  RTVIWMGRKQ  ETVEDVPCGN
451 TVALVGLDQF  ITKNATLTNE  KEVDAHPIRA  MKFSVSPVVR  VAVQCKVASD
501 LPKLVEGLKR  LAKSDPMVVC  TIEESGEHII  AGAGELHLEI  CLKDLQDDFM
551 GGAEIIKSDP  VVSFRETVLE  KSCRVMSKS  PNKHNRLYME  ARPMEEGLAE
601 AIDEGRIGPR  DDPKARAKIL  SEEFGWDKDL  AKKIWCFGPE  TTGPNMVVDM
651 CKGVQYLNEI  KDSVVAGFQW  ASKEGALAEE  NMRGICFEVC  DVVLHADAIH
701 RGGGQVIPTA  RRVIYASQLT  AKPRLLEPVY  LVEIQAPEQA  LGGIYSVLNQ
751 KRGHVFEELQ  RPGTPLYNIK  AYLPVIESFG  FSGTLRAATS  GQAFPQCVFD
801 HWDMMSSDPM  EPGSQAANLV  TEIRKRRGLK  EQMTPLSEFE  DKL
```

Spot No.: **116**

NCBI accession No.: **gi|6707018** Species: *Hevea brasiliensis*

Protein name: latex protein allergen Hev b 7

PMF score: **147**

Sequence coverage %: **64**

Matched peptides No.: **17**

Total peptides No.: **60**

Calculated Mr: **43107**

Calculated pI: **5.00**

Probability Based Mowse Score:

Protein score is  $-10 \cdot \log(P)$ , where P is the probability that the observed match is a random event. Protein scores greater than 73 are significant ( $p < 0.05$ ).

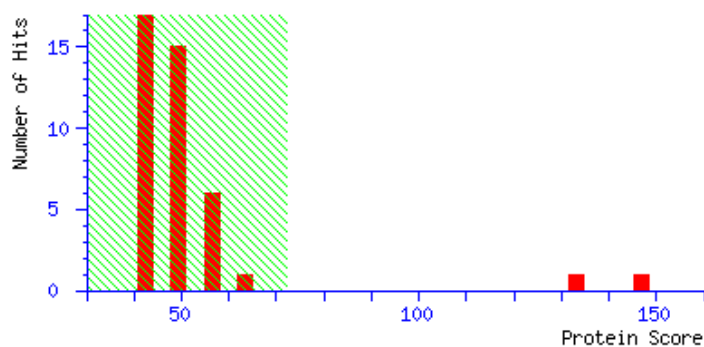

Matched peptide sequences: shown in **Bold Red**:

```
1  MAIGSTPLTQ  GKKITVLSID  GGGIRGIIPG  IILASLESKL  QDLDGPDARI
51  ADYFDIIAGT  STGGLITTML  TAPNEDKKPM  YQAKDIKDFY  LENCPKIFPK
101 ESRDNYDPIH  SIGPIYDGEY  LRELCNNLLK  DLTVKDTLTD  VIIPTFDIKL
151 LLPVIFSSDD  AKCNALKNAR  LADVCISTSA  APVLLPAHSF  TTEDDKNIHT
201 FELIDGGVAA  TNPTLLALTH  IRNEIIRQNP  RFIGANLTES  KSRLVLSLGT
251 GKSEYKEKYN  ADMTSKWRLY  NWALYNGNSP  AVDIFSNASS  DMVDFHLSAL
301 FKSLDCEDYY  LRIQDDTLTG  EESSGHIATE  ENLQRLVEIG  TELLEKQESR
351 INLDTGRLES  IPGAPTNEAA  IAKFAKLLSE  ERKLRQLK
```

Spot No.: 117

NCBI accession No.: [gi|51315784](#) Species: *Hevea brasiliensis*

PFF score: [59]

Protein name: Esterase

Matched peptides No.: [1]

Sequence coverage %: [4]

Matched sequences: [K.AAAFYPLNPPYGETFFHR.S](#)

Calculated Mr: 43871

Calculated pI: 5.00

Probability Based Mowse Score:

Ions score is  $-10 \cdot \log(P)$ , where P is the probability that the observed match is a random event. Individual ions scores  $> 43$  indicate identity or extensive homology ( $p < 0.05$ ). Protein scores are derived from ions scores as a non-probabilistic basis for ranking protein hits.

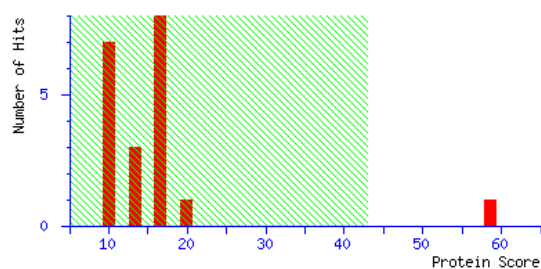

Matched peptide sequences: shown in **Bold Red**:

```
1  MEFPETNNNP  IITLSFLLCM  LSLAYASETC  DFPALFNFGD  SNSDTGGKAA
51  AFYPLNPPYG ETFFHRSTGR  YSDGRLIIDF  IAESFNLPYL  SPYLSSLGSN
101 FKHGADFATA  GSTIKLPITI  IPAHGGFSPF  YLDVQYSQFR  QFIPRSQFIR
151 ETGGIFAELV  PEEYYFEKAL  YTFDIGQNDL  TEGFLNLTVE  EVNATVPDLV
201 NSFSANVKKI  YDLGARTFWI  HNTGPIGCLS  FILTYFPWAE  KDSAGCAKAY
251 NEVAQHFNHK  LKEIVAQLRK  DLPLATFVHV  DIYSVKYSLF  SEPEKHGFEE
301 PLITCCGYGG  KYNFSVTAPC  GDTVTADDGT  KIVVGSCACP  SVRVNWDGAH
351 YTEAANEYFF  DQISTGAFSD  PPVPLNMACH  KTESLRTLAS  V
```

Spot No.: 118

NCBI accession No.: [gi|38122474](#) Species: *Hevea brasiliensis*

Protein name: rubber elongation factor

PMF score: 98

Sequence coverage %: 57

Matched peptides No.: 9

Total peptides No.: 44

Calculated Mr: 19570

Calculated pl: 5.06

Probability Based Mowse Score:

Protein score is  $-10 \cdot \log(P)$ , where P is the probability that the observed match is a random event. Protein scores greater than 73 are significant ( $p < 0.05$ ).

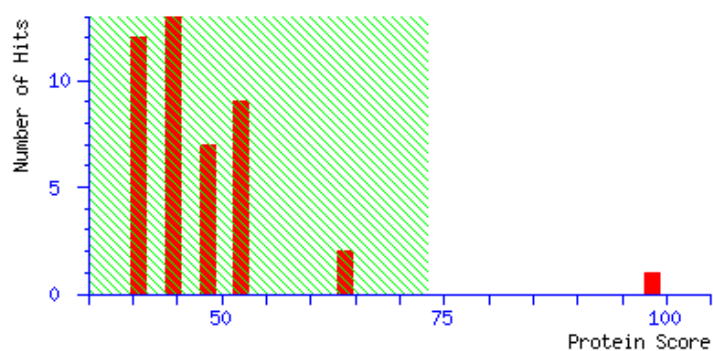

Matched peptide sequences: shown in **Bold Red**

```
1 MAEGEEEVNI QEEANKGEEN PQEENIQEE TNKGEENIQE EANIEEEANK
51 EEESLKYLDF VQAATVYARA SFSKLYLFAK DKSGPFKPGV NTVESRFKSV
101 VRPVYNKFQP VPNKVLKFAD RRVDAYVTVL DRIVPPIVKR ASIQAYSVAE
151 GAALAVASYL PLHTKRLSKV LYGDG
```

Spot No.: 119

NCBI accession No.: [gi|3023685](#) Species: *Alnus glutinosa*

PFF score: [51]

Protein name: **Enolase; AltName: Full=2-phospho-D-glycerate hydro-lyase; AltName: Full=2-phosphoglycerate dehydratase**

Matched peptides No.: [1] Sequence coverage %: [3]

Matched sequences: **R.IEEELGSEAVYAGANFR.T**

Calculated Mr: 47796

Calculated pI: 5.41

Probability Based Mowse Score:

Ions score is  $-10 \cdot \log(P)$ , where P is the probability that the observed match is a random event. Individual ions scores > 40 indicate peptides with significant homology. Individual ions scores > 44 indicate identity or extensive homology ( $p < 0.05$ ). Protein scores are derived from ions scores as a non-probabilistic basis for ranking protein hits.

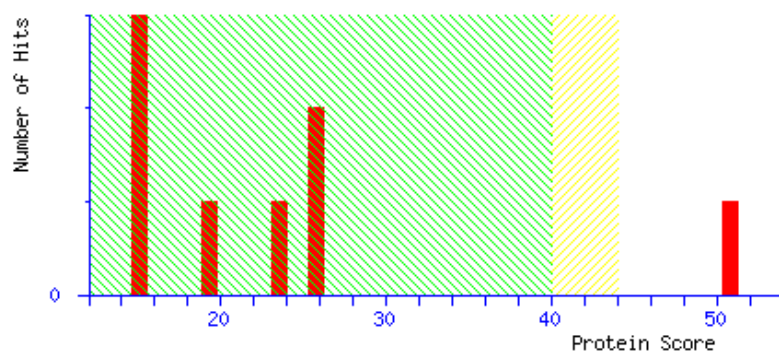

Matched peptide sequences: shown in **Bold Red**:

```
1 MAEITHIKAR QIFDSRGNPT VEA EVTTANG VVSRAAVPSG ASTGVYEALE
51 LRDGGS DYLG KGV LKAVDNV NKIIGPALIG KDATEQTAID IDFMFQQLDG
101 TVNEGWCKQ KLGANAILAV SLAVCKAGAS VKKIPLYKHI ANLAGNPKLV
151 LPVPAFNVIN GGSHAGNKLA MQEFMILPVG ASSFKEAMKM GVEVYHHLKA
201 VIKKKYQDA TNVGDEGGFA PNIQENKEGL ELLKTAIAKA GYV VIGMDVA
251 ASEFYEKDKD ITNFKEENND GSQKISADQL KDLYKSFVDE YPIVSIEDPF
301 DQDDWEHYSK LTAEIGEKVQ IVGDDLLVTN PKRVEKAIKE KACNALLLV
351 NQIGSVTESI EAVKMSKRAG WGVMAHRSGE TEDTFIADLS VGLATGQIKT
401 GAPCRSERLA KYNQLLRIEE ELGSEAVYAG ANFRTPVEPY
```



Spot No.: 120

NCBI accession No.: [gi|351723039](#) Species: *Glycine max*

Protein name: [uncharacterized protein LOC100305754 precursor](#)

PMF score: **81**

Sequence coverage %: **51**

Matched peptides No.: **8**

Total peptides No.: **28**

Calculated Mr: **21968**

Calculated pI: **4.83**

Probability Based Mowse Score:

Protein score is  $-10 \cdot \log(P)$ , where P is the probability that the observed match is a random event. Protein scores greater than 73 are significant ( $p < 0.05$ ).

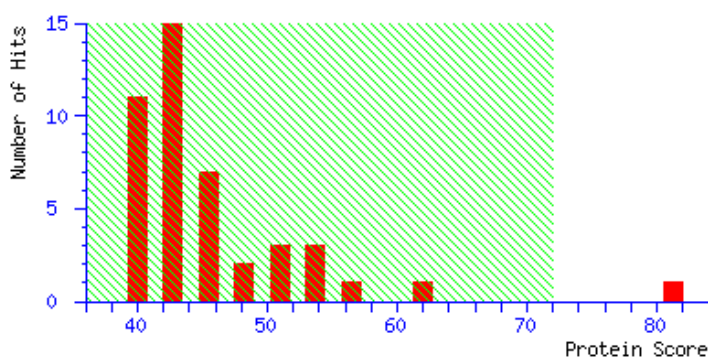

Matched peptide sequences: shown in **Bold Red**

1 **MSMRSIGTSL** **SLMVWLVIAT** **SALAKSDNPP** **VLDIQGNPLE** **PGKDYYIKPA**  
51 **ITDVGGRVTL** **LSRNNPCPLY** **VGQENSDAAE** **GLPLFFTPFA** **EEDDVVKVNR**  
101 **DFKLTFSAA** **ICVQGINWNL** **AEKDS**ES**GRR** **LIAASGRDDY** **FRITETPIKG**  
151 **SYIIGWCPTD** **VCPFCRFDCG** **IVGGLRENGK** **ILLALDGNVL** **PVVFEKAY**



Spot No.: **121**

NCBI accession No.: **gi| 255554865** Species: *Ricinus communis*

PFF score: **[55]**

Protein name: **lactoylglutathione lyase, putative**

Matched peptides No.: **[1]**

Sequence coverage %: **[3]**

Matched sequences: **K.FYTECFGMK.L**

Calculated Mr: **31641**

Calculated pI: **7.63**

Probability Based Mowse Score:

Ions score is  $-10 \cdot \log(P)$ , where P is the probability that the observed match is a random event.

Individual ions scores  $> 40$  indicate peptides with significant homology.

Individual ions scores  $> 44$  indicate identity or extensive homology ( $p < 0.05$ ).

Protein scores are derived from ions scores as a non-probabilistic basis for ranking protein hits.

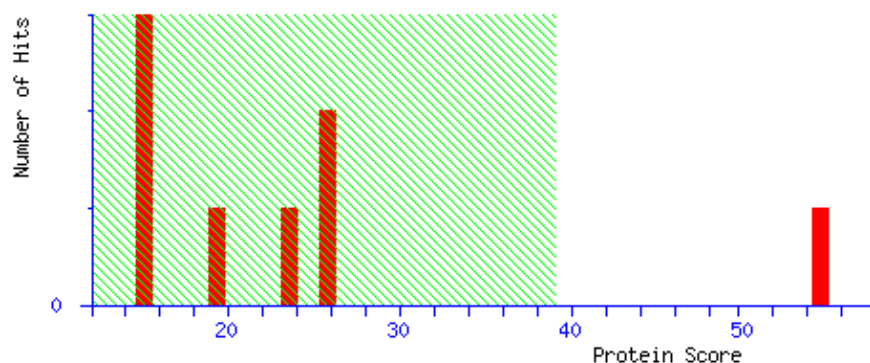

Matched peptide sequences: shown in **Bold Red**:

```
1  MAAEATAPNA  DVLEWPKKDK  RRLHAVYRV  GDLDRTIKFY TECFGMKLLR
51  KRDIPEEKYS  NAFLGFGPEE  TNFVVELTYN  YGVTSYDIGT  GFGHFATQ
101 DVYKLVVEVL  AKGGAVTREP  GPVKGGTTVI  AFVKDPDGYI  FELIQRGPTP
151 EPLCQVMLRV  GDLDRSIRFY  EKALGMKLLR  KVDKPEYKYT  LAMMGYADEY
201 ETTVLELTYN  YGVTEYTKGN  AYAQVAISTD  DVYKSAEVVN  LVTQELGGKI
251 TRQPGPIPGL  NTKITSFLDP  DGWKTKRKRR
```

Spot No.: **122**

NCBI accession No.: **gi|118485535** Species: *Populus trichocarpa*

**PFF** score: **[83]**

Protein name: **unknown**

Matched peptides No.: **[1]**

Sequence coverage %: **[8]**

Matched sequences: **K.VATPAQAQEVHLELR.K**

Calculated Mr: **18429**

Calculated pI: **5.59**

Probability Based Mowse Score:

Ions score is  $-10 \cdot \log(P)$ , where P is the probability that the observed match is a random event.

Individual ions scores  $> 45$  indicate identity or extensive homology ( $p < 0.05$ ).

Protein scores are derived from ions scores as a non-probabilistic basis for ranking protein hits.

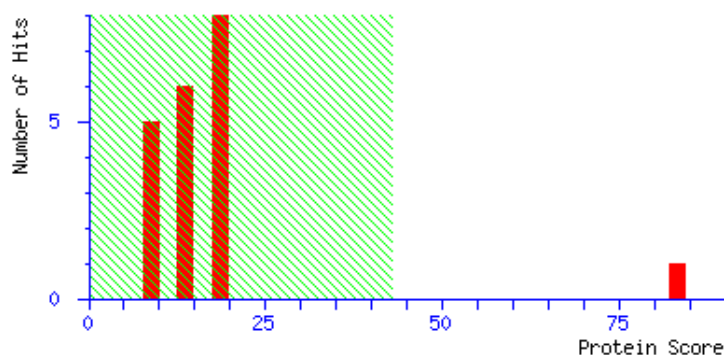

Matched peptide sequences: shown in **Bold Red**:

```
1 MLVNLGIPWV ILGHSERRSL LNESNEFVGD KVAYALSLGL KVIACVGETL
51 QQRESGSTMA VVAAQTKAIA ANVSYWDNVV MAYEPVWAIG TGKVATPAQA
101 QEVHLELRKW FHDNVGAEVA ASTRIIYGGV VNGANCKELA GQPDVDGFLV
151 GGASLKPEFI DIIKSATVKS QL
```

Spot No.: **123**

NCBI accession No.: **gi|15225839** Species: *Arabidopsis thaliana*

Protein name: **endopeptidase/ peptidase/ threonine-type**

**endopeptidase**

**PMF** Mascot score: **86**

Sequence coverage %: **40**

Matched peptides No.: **14**

Total peptides No.: **56**

Calculated Mr: **27645**

Calculated pI: **5.93**

Probability Based Mowse Score:

Protein score is  $-10 \cdot \log(P)$ , where P is the probability that the observed match is a random event. Protein scores greater than 73 are significant ( $p < 0.05$ ).

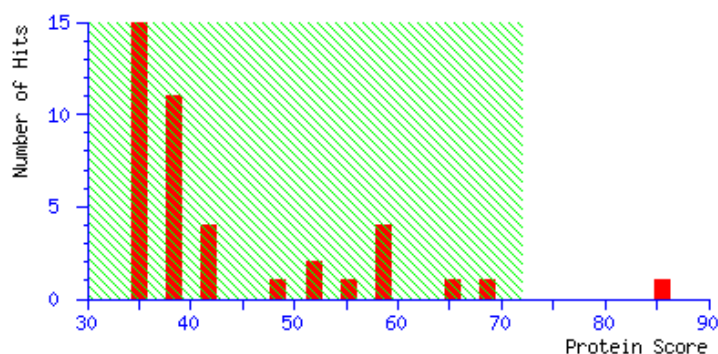

Matched peptide sequences: shown in **Bold Red**:

```
1  MSSIGTGYDL  SVTTFSPDGR  VFQIEYAAKA  VDNSGTVVGI  KCKDGIVMGV
51  EKLIASKMML  PGSNRRHSV  HRHAGMAVAG  LAADGRQIVA  RAKSEARSYE
101 SVYGDVFPVK  ELSERVASYV  HLCTLYWWLR  PFGCGVILGG  YDRDGPQLYM
151 IEPSGISYRY  FGAAIGKQKQ  AAKTEIEKLN  LSEMTCKEGV  IEVAKI IYKL
201 HDEAKDKAFE  LEMSWICEES  KREHQKVPDD  LLEEAKTAAK  TALEEMDAD
```

Spot No.: **124**

NCBI accession No.: **gi| 10862818** Species: *Hevea brasiliensis*

Protein name: **IgE-binding protein Mn SOD**

**PMF** Mascot score: **81**

Sequence coverage %: **37**

Matched peptides No.: **5**

Total peptides No.: **8**

Calculated Mr: **22958**

Calculated pI: **6.06**

Probability Based Mowse Score:

Protein score is  $-10 \cdot \log(P)$ , where P is the probability that the observed match is a random event. Protein scores greater than 73 are significant ( $p < 0.05$ ).

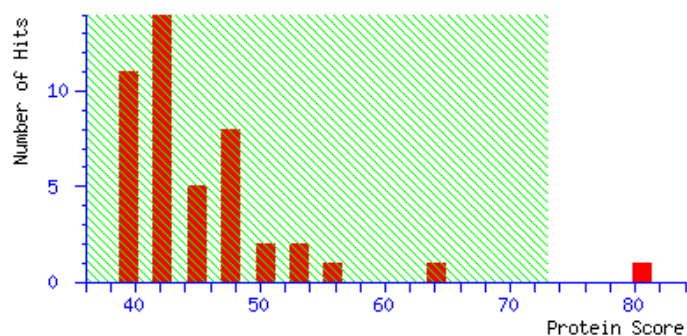

Matched peptide sequences: shown in **Bold Red**:

```
1  QTFSLPDLPY  DYGALEPAIS  GEIMQLHHQK  HHQTYITNYN  KALEQLNDAI
51  EKGDSAADVVK  LQSAIKFNGG  GHVNHSIFWK  NLAPVREGGG  ELPHGSLGWA
101 IDADFGSLEK  LIQLMNAEGA  ALRGSGVWVL  ALDKELKRLV  VETTANQDPL
151 VTKGPTLVPL  LGIDVWEHAY  YLQYKNVRPD  YLRNIWKVMN  WKYASEVYAK
201  ECPSS
```

Spot No.: 125

NCBI accession No.: [gi|1170781](#) Species: *Glycine max*

PFF score: [51]

Protein name: [Glutathione S-transferase 3](#)

Matched peptides No.: [1] Sequence coverage %: [5]

Matched sequences: [K.SPLMPSDPYKR.S+Oxidation \(M\)](#)

Calculated Mr: 26112

Calculated pI: 5.58

Probability Based Mowse Score:

Ions score is  $-10 \cdot \log(P)$ , where P is the probability that the observed match is a random event. Individual ions scores  $> 45$  indicate identity or extensive homology ( $p < 0.05$ ). Protein scores are derived from ions scores as a non-probabilistic basis for ranking protein hits.

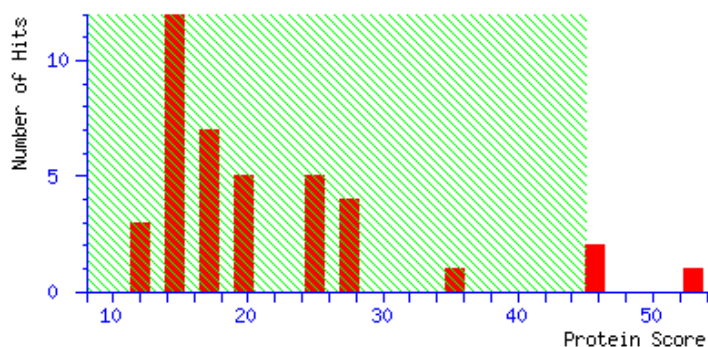

Matched peptide sequences: shown in **Bold Red**:

```
1 MSDEVVLLDT WASMYGMRAR IALAEKGVRY EYKEENLMNR SPLLLQMNPI
51 HKKIPVLIHN GKPICESAI VQYIDEVWND KSPLMPSDPY KRSQARFWVD
101 YIDKKIYDTW KKMWLSKGEE HEEGKKELIS IFKQLEETLT DKPFYGD DTF
151 GFVDLCLITF SSWFYTYETY GNFKMEEECF KLMAWVKRCM ERETVSNTLP
201 DAKKVYGLIV ELQKTLESK
```

Spot No.: **126**

NCBI accession No.: **gi|29170601** Species: *Hevea brasiliensis*

**PFF** score: **[97]**

Protein name: **small rubber particle protein**

Matched peptides No.: **[1]** Sequence coverage %: **[12]**

Matched sequences: **K.ENENFQQEANEQEEK.L**

Calculated Mr: **12769**

Calculated pI: **4.61**

Probability Based Mowse Score:

Ions score is  $-10 \cdot \log(P)$ , where P is the probability that the observed match is a random event. Individual ions scores  $> 44$  indicate identity or extensive homology ( $p < 0.05$ ). Protein scores are derived from ions scores as a non-probabilistic basis for ranking protein hits.

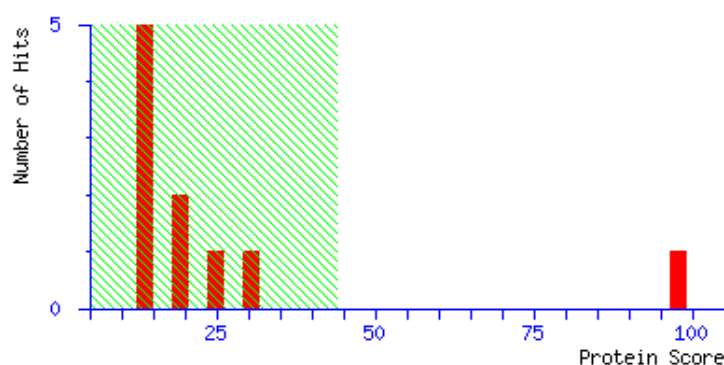

Matched peptide sequences: shown in **Bold Red**:

```
1 MAEGKENENF QQEANEQEEK LKYLEFVQAT TDNAVTALSN IYLYAKDNSG
51 PLKPGVETIE GVAKTVVIPA SKIPTEAIKF ADRAVDASFT TLQNIVPSVL
101 KQLPTQACDT SVKESAE
```

Spot No.: 127

NCBI accession No.: [gi|2832430](#) Species: *Hevea brasiliensis*

PFF score: [84]

Protein name: prohevein

Matched peptides No.: [1]

Sequence coverage %: [10]

Matched sequences: [K.YGWTAFCGPVGAHGQPSCGK.C](#)

Calculated Mr: 20852

Calculated pI: 5.64

### Probability Based Mowse Score:

Ions score is  $-10 \cdot \log(P)$ , where P is the probability that the observed match is a random event. Individual ions scores  $> 43$  indicate identity or extensive homology ( $p < 0.05$ ). Protein scores are derived from ions scores as a non-probabilistic basis for ranking protein hits.

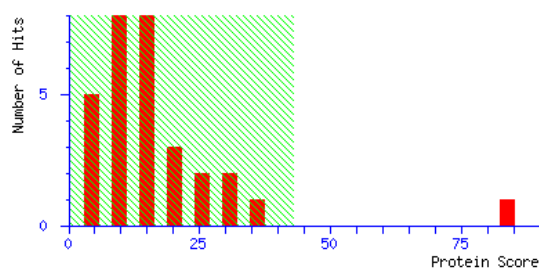

Matched peptide sequences: shown in **Bold Red**:

```
1  EQCGRQAGGK LCPNNLCCSQ WGWCGSTDEY CSPDHNCQSN CKDSGEGVGG
51  GSASNVLATY HLYNSQDHGW DLNAASAYCS TWDANKPYSW RSKYYGWTAFC
101 GPVGAHGQPS CGKCLSVTNT GTGAKATVRI VDQCSNGGLD LDVNVFRQLD
151 TDGKGYERGH LTVNYQFVDC GDSFNPLFSV MKSSVIN
```



Spot No.: **128**

NCBI accession No.: **gi|224054224** Species: *Populus trichocarpa*

**PFF** score: **[68]**

Protein name: **predicted protein**

Matched peptides No.: **[2]**

Sequence coverage %: **[12]**

Matched sequences: **R.AYVGD**RPTWR.N;

**R.NPQHP**WR.V

Calculated Mr: **15003**

Calculated pI: **6.82**

Probability Based Mowse Score:

Ions score is  $-10 \cdot \log(P)$ , where P is the probability that the observed match is a random event.

Individual ions scores  $> 45$  indicate identity or extensive homology ( $p < 0.05$ ).

Protein scores are derived from ions scores as a non-probabilistic basis for ranking protein hits.

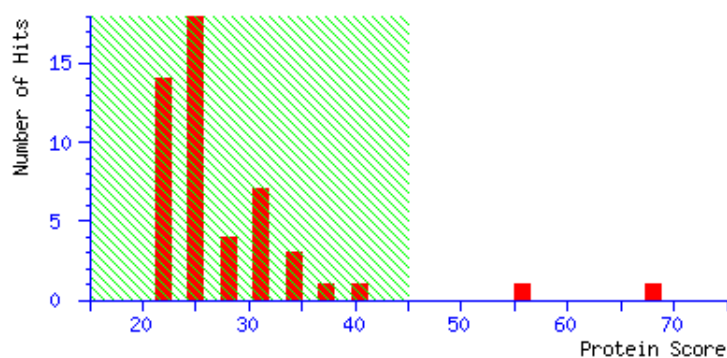

Matched peptide sequences: shown in **Bold Red**:

```
1  MTVKLVDATI  SSFGSVFEKF  KAEAPKNKVN  LILFLADNDP  STNLSWCPDC
51  VRAEPVILKK  LEALPDDVAL  LRAYVGDRPT  WRNPQHPWRV  DSRFKLKGVP
101 TLISWENDAV  KGRLEDYEAH  LEHKINALVS  GN
```

Spot No.: **129**

NCBI accession No.: **gi| 329750601** Species: *Hevea brasiliensis*

**PFF** score: **[61]**

Protein name: **thioredoxin H-type 2**

Matched peptides No.: **[2]**

Sequence coverage %: **[12]**

Matched sequences: **R.AYVGD**RPTWR.N;

**R.NPQHP**WR.V

Calculated Mr: **13295**

Calculated pI: **5.89**

Probability Based Mowse Score:

Ions score is  $-10 \cdot \log(P)$ , where P is the probability that the observed match is a random event.

Individual ions scores  $> 45$  indicate identity or extensive homology ( $p < 0.05$ ).

Protein scores are derived from ions scores as a non-probabilistic basis for ranking protein hits.

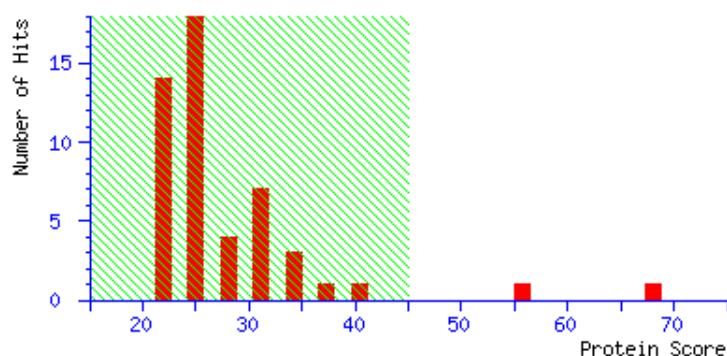

Matched peptide sequences: shown in **Bold Red**:

```
1  MTVKLVDATI  SSFGSVFEKF  KAEAPKNKVN  LILFLADNDP  STNLSWCPDC
51  VRAEPVILKK  LEALPDDVAL  LRAYVGDRPT  WRNPQHPWRV  DSRFKLKGVP
101 TLISWENDAV  KGRLEDYEAH  LEHKINALVS  GN
```

Spot No.: **130**

NCBI accession No.: **gi|268321205**

Plantspecies: ***Hevea brasiliensis*** Protein name: **latex cystatin**

**PMF** score: **81** Sequence coverage %: **48**

Matched peptides No.: **6** Total peptides No.:**42**

Calculated Mr: **11248** Calculated pI: **5.45**

Probability Based Mowse Score:

Protein score is  $-10 \cdot \log(P)$ , where P is the probability that the observed match is a random event. Protein scores greater than 73 are significant ( $p < 0.05$ ).

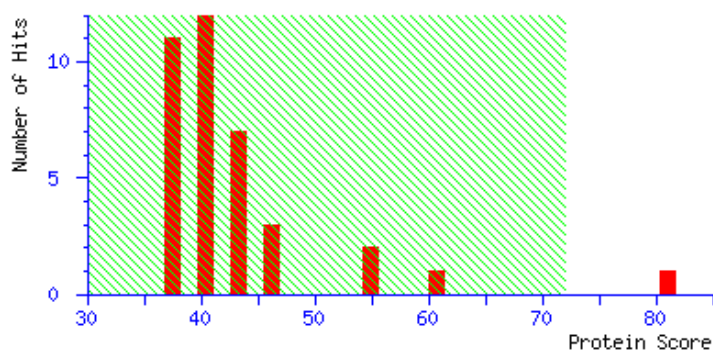

Matched peptide sequences: shown in **Bold Red**

```
1 MAKLGGVKEV EGSANSVEIN SLARYAVDDY NQKQNALLEF KKVVNAKQQV  
51 VAGTIYYITL EVIDGGQKKV YEAKVWEKPW LNFKEVQEPK LIGDAPSDST  
101 A
```

Spot No.: **131**

NCBI accession No.: **gi|132270** Species: *Hevea brasiliensis*

PFF score: **[539]**

Protein name: **small rubber particle protein**

Matched peptides No.: **[5]** Sequence coverage %: **[39]**

Matched sequences: **K.DKSGPLQPGVDIIEGPVK.N;**

**K.SGPLQPGVDIIEGPVK.N;**

**K.FVDSTVVASVTIIDR.S;**

**K.DASIQVVS AIR.A;**

**R.SLASSLPGQTK.I**

Calculated Mr: **14713**

Calculated pI: **5.04**

Probability Based Mowse Score:

Ions score is  $-10 \cdot \log(P)$ , where P is the probability that the observed match is a random event.

Individual ions scores  $> 44$  indicate identity or extensive homology ( $p < 0.05$ ).

Protein scores are derived from ions scores as a non-probabilistic basis for ranking protein hits.

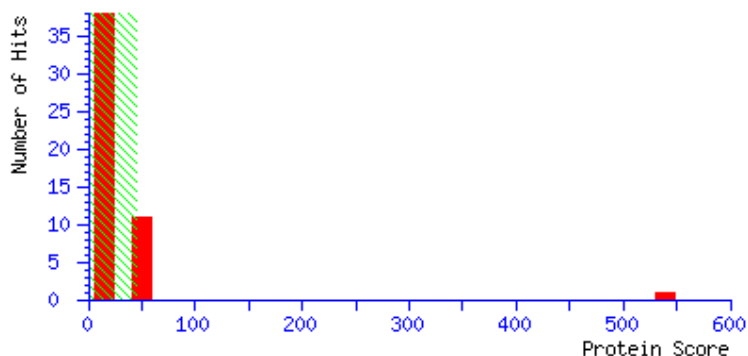

Matched peptide sequences: shown in **Bold Red**:

```
1 MAEDEDNQQG QGEGKLYLGF VQDAATYAVT TFSNVYLFAK DKSGPLQPGV
51 DIIEGPVKNV AVPLYNRFSY IPNGALKFVD STVVASVTII DRSLPPIVKD
101 ASIQVVSAIR AAPEAARSLA SSLPGQTKIL AKVIFYGEN
```

Spot No.: 132

NCBI accession No.: [gi|132270](#) Species: *Hevea brasiliensis*

Protein name: **Rubber elongation factor protein**

PMF score: **138**

Sequence coverage %: **81**

Matched peptides No.: **10**

Total peptides No.: **28**

Calculated Mr: **14713**

Calculated pI: **5.04**

Probability Based Mowse Score:

Protein score is  $-10 \cdot \log(P)$ , where P is the probability that the observed match is a random event. Protein scores greater than 73 are significant ( $p < 0.05$ ).

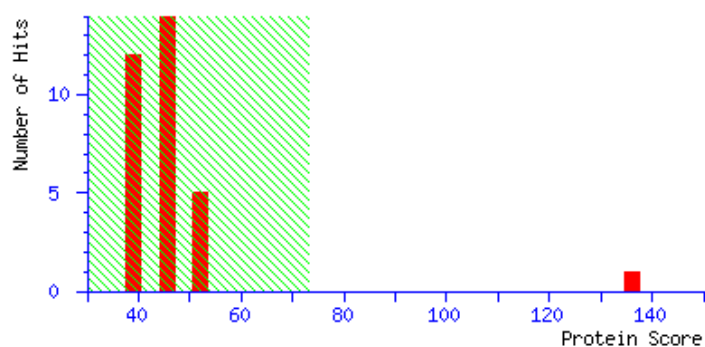

Matched peptide sequences: shown in **Bold Red**

```
1 MAEDEDNQQG QGEGLKYLGF VQDAATYAVT TFSNVYLFAK DKSGPLQPGV  
51 DIIEGPVKNV AVPLYNRFSY IPNGALKFVD STVVASVTII DRSLPPIVKD  
101 ASIQVVS AIR APEAARSLA SSLPGQTKIL AKV FYGEN
```

Spot No.: **133**

NCBI accession No.: **gi|242083244**

Plantspecies: ***Sorghum bicolor***

Protein name: **hypothetical protein SORBIDRAFT\_08g008236**

PMF score: **81**

Sequence coverage %: **89**

Matched peptides No.: **7**

Total peptides No.: **33**

Calculated Mr: **8620**

Calculated pI: **6.4**

Probability Based Mowse Score:

Protein score is  $-10 \cdot \log(P)$ , where P is the probability that the observed match is a random event. Protein scores greater than 73 are significant ( $p < 0.05$ ).

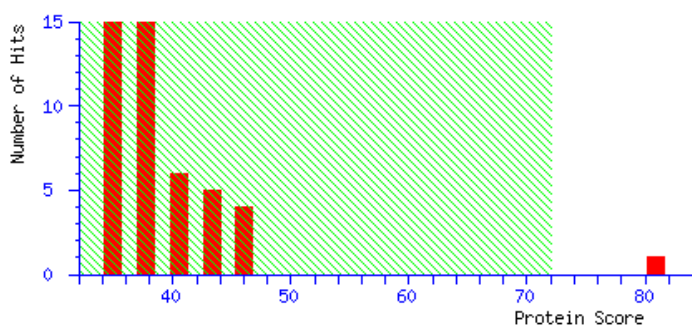

Matched peptide sequences: shown in **Bold Red**

**1 CVENIILSVL FWSKVQLCLR ASQPLLVALR IVDGDETPID PKIMVAMDVA**  
**51 KAIIKESLKD KPILLNEVLK YYDNR**

Spot No.: **134**

NCBI accession No.: **gi|29170601** Species: *Hevea brasiliensis*

PFF score: **[85]**

Protein name: **small rubber particle protein**

Matched peptides No.: **[1]** Sequence coverage %: **[15]**

Matched sequences: **R.AVDASFTTLQNIVPSVLK.Q**

Calculated Mr: **12769**

Calculated pI: **4.61**

Probability Based Mowse Score:

Ions score is  $-10 \cdot \log(P)$ , where P is the probability that the observed match is a random event.

Individual ions scores  $> 39$  indicate peptides with significant homology.

Individual ions scores  $> 44$  indicate identity or extensive homology ( $p < 0.05$ ).

Protein scores are derived from ions scores as a non-probabilistic basis for ranking protein hits.

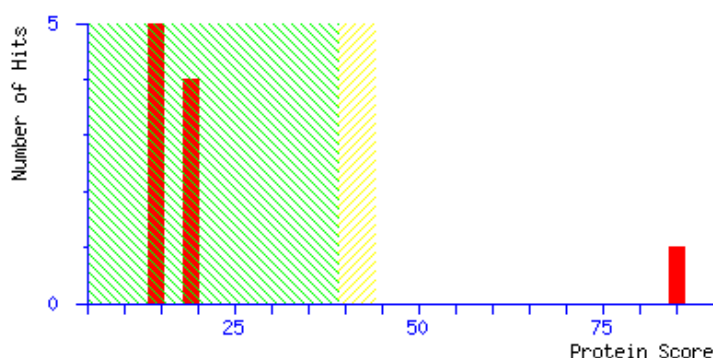

Matched peptide sequences: shown in **Bold Red**:

```
1 MAEGKENENF QQEANEQEEK LKYLEFVQAT TDNAVTALSN IYLYAKDNSG
51 PLKPGVETIE GVAKTIVIPA SKIPTEAIKF ADRAVDASFT TLQNIVPSVL
101 KQLPTQACDT SVKESAE
```



Spot No.: **135**

NCBI accession No.: **gi|29170601** Species: *Hevea brasiliensis*

**PFF** score: **[485]**

Protein name: **small rubber particle protein**

Matched peptides No.: **[4]** Sequence coverage %: **[53]**

Matched sequences: **K.ENENFQQEANEQEEK.L;**

**K.DNSGPLKPGVETIEGVAK.T;**

**R.AVDASFTTLQNIVPSVLK.Q;**

**K.QLPTQACDTSVK.E**

Calculated Mr: **12769**

Calculated *pI*: **4.61**

Probability Based Mowse Score:

Ions score is  $-10 \cdot \log(P)$ , where *P* is the probability that the observed match is a random event.

Individual ions scores > 44 indicate identity or extensive homology ( $p < 0.05$ ).

Protein scores are derived from ions scores as a non-probabilistic basis for ranking protein hits.

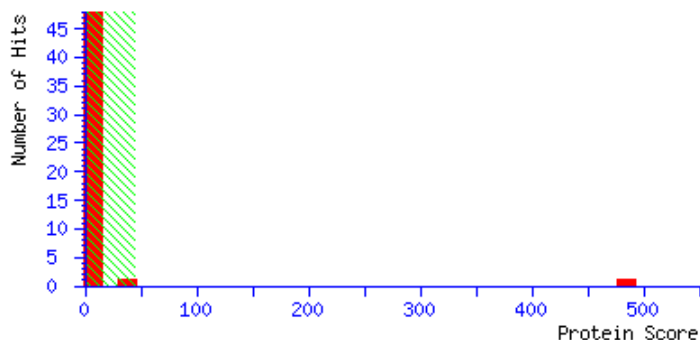

Matched peptide sequences: shown in **Bold Red**:

```
1 MAEGKENENF QQEANEQEEK LKYLEFVQAT TDNAV TALS N IYLYAKDNSG
51 PLKPGVETIE GVAKTVVIPA SKIPTEAIKF ADRAVDASFT TLQNIVPSVL
101 KQLPTQACDT SVKESAE
```

Spot No.: 136

NCBI accession No.: [gi|354318](#) Species: *Triticum aestivum*

PFF score: [128] Protein name: [calmodulin](#)

Matched peptides No.: [1] Sequence coverage %: [10]

Matched sequences: [R.VFDKDQDGFISAAELR.H](#)

Calculated Mr: 16876

Calculated pI: 4.10

Probability Based Mowse Score:

Ions score is  $-10 \cdot \log(P)$ , where P is the probability that the observed match is a random event.

Individual ions scores > 45 indicate identity or extensive homology ( $p < 0.05$ ).

Protein scores are derived from ions scores as a non-probabilistic basis for ranking protein hits.

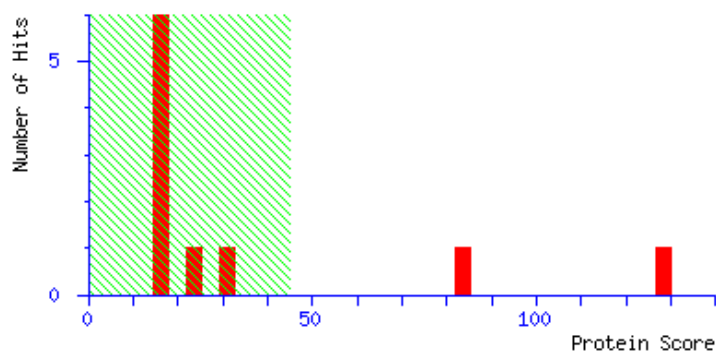

Matched peptide sequences: shown in **Bold Red**:

```
1 ADQLTDEQNI AEFKEAFSLF DKDGDGCITT KELGIVMRSL GQNPTEAELQ
51 DMINEVDADG NGTIDFPEFL NLMARKMKDT DSEEELKEAF RVFDKDQDGF
101 ISAAELRHVM TNLGEKLTDE EVDEMIREAD VDG DGQINYE EFVKVMMAK
```

Spot No.: 137

NCBI accession No.: [gi|14423933](#) Species: *Hevea brasiliensis*

Protein name: [Small rubber particle protein](#)

PMF score: **84** Sequence coverage %: **65**

Matched peptides No.: **9** Total peptides No.:**43**

Calculated Mr: **22331** Calculated pI: **4.80**

Probability Based Mowse Score:

Protein score is  $-10 \cdot \log(P)$ , where P is the probability that the observed match is a random event. Protein scores greater than 73 are significant ( $p < 0.05$ ).

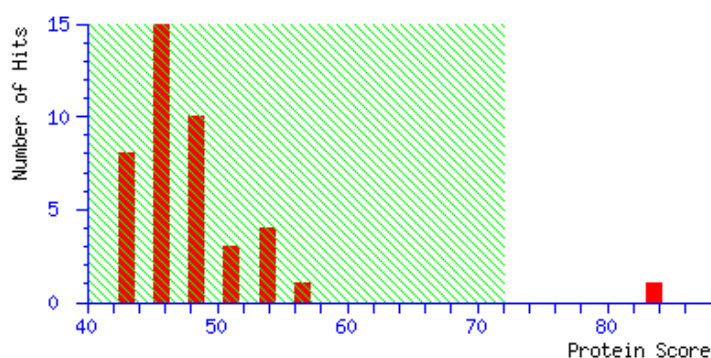

Matched peptide sequences: shown in **Bold Red**

```
1 MAEEVEEERL KYLDFVRAAG VYAVDSFSTL YLYARDISGP LKPGVDTIEN
51 VVKTVVTPVY YIPLEAVKfV DKTVDVSVTS LDGVVPPVIK QVSAQTYSVA
101 QDAPRIVLDV ASSVFNTGVQ EGAKALYANL EPKAEQYAVI TWRALNKLPL
151 VPQVANVVVP TAVYFSEKYN DVVRGTTEQG YRVSSYLPLL PTEKITKVFG
201 DEAS
```

Spot No.: 138

NCBI accession No.: gi|14423933 Species: *Hevea brasiliensis*

Protein name: Small rubber particle protein

PMF score: 162 Sequence coverage %: 85

Matched peptides No.: 13 Total peptides No.: 43

Calculated Mr: 22331 Calculated pI: 4.80

Probability Based Mowse Score:

Protein score is  $-10 \cdot \log(P)$ , where P is the probability that the observed match is a random event.  
Protein scores greater than 73 are significant ( $p < 0.05$ ).

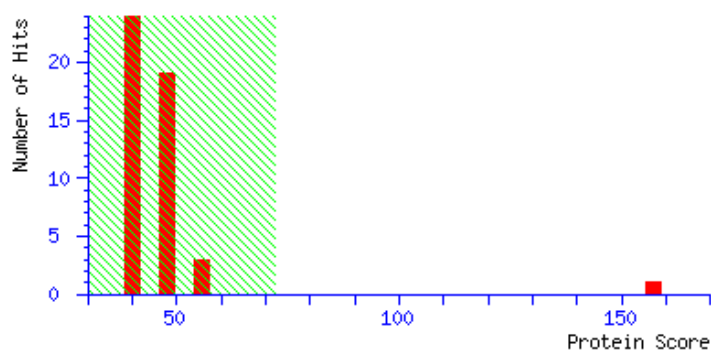

Matched peptide sequences: shown in **Bold Red**

```
1 MAEEVEEERL KYLDFVRAAG VYAVDSFSTL YLYAKDISGP LKPGVDTIEN
51 VVKTVVTPVY YIPLEAVKRV DKTVDVSVTS LDGVVPPVIK QVSAQTYVA
101 QDAPRIVLDV ASSVENTGVQ EGAKALYANL EPKAEQYAVI TWRALNKLPL
151 VPQVANVVVP TAVYFSEKYN DVVRGTTEQG YRVSSYLPLL PTEKITKVFQ
201 DEAS
```

Spot No.: 139

NCBI accession No.: [gi|14423688](#) Species: *Hevea brasiliensis*

Protein name: **Enolase 1**

PMF score: 107

Sequence coverage %: 44

Matched peptides No.:14

Total peptides No.:47

Calculated Mr: 48029

Calculated pI:5.57

Probability Based Mowse Score:

Protein score is  $-10 \cdot \log(P)$ , where P is the probability that the observed match is a random event. Protein scores greater than 73 are significant ( $p < 0.05$ ).

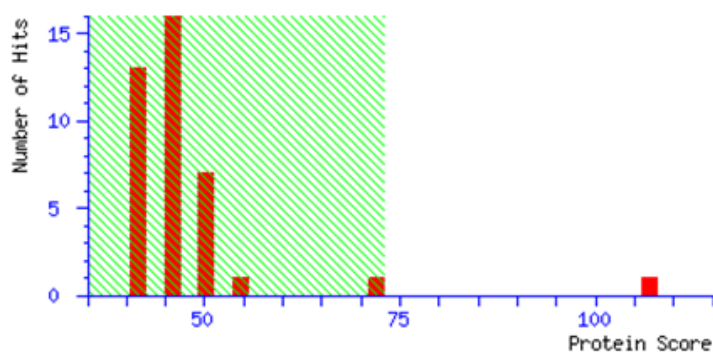

Matched peptide sequences: shown in **Bold red**:

```
1  MAITIVSVRA  RQIFDSRGNP  TVEADVCLSD  GYLARAAVPS  GASTGIYEAL
51  ELRDGGSDDL  GKGVS KAVEN  VNIIIGPALV  GKDPTDQVGI  DNFMVQQLDG
101 TVNEWGWCKQ  KLGANAILAV  SLAVCKAGAH  VKGIPLYEHI  ANLAGNKNLV
151 LPVPAFNVIN  GGSHAGNKLA  MQEFMILPVG  ASSFKEAMKM  GAEVYHHLKS
201 VIKKKYQQDA  TNVGDEGGFA  PNIQENKEGL  ELLKTAIAKA  GYTGKVVIGM
251 DVAASEFYGS  DQTYDLNFKE  ENNNGSQKIS  GEALKDLYKS  FVAEYPIVSI
301 EDPFDQDDWA  HYAKLTSEIG  EKVQIVGDDL  LVTNPKRVEK  AIKEKACNAL
351 LLKVNQIGSV  TESIEAVKMS  KRAGWGVMS  HRSGETEDTF  IADLSVGLAT
401 GQIKTGAPCR  SERLAKYNQL  LRIEELGSE  AVYAGANFRK  FVEPY
```

Spot No.: 140

NCBI accession No.: [gi|132270](#) Species: *Hevea brasiliensis*

PFF score: [52] Protein name: Rubber elongation factor protein

Matched peptides No.: [1] Sequence coverage %: [10]

Matched sequences: [K.FVDSTVVASVTIIDR.S](#)

Calculated Mr: 14713

Calculated pI: 5.04

### Probability Based Mowse Score:

Ions score is  $-10 \cdot \log(P)$ , where P is the probability that the observed match is a random event. Individual ions scores  $> 45$  indicate identity or extensive homology ( $p < 0.05$ ). Protein scores are derived from ions scores as a non-probabilistic basis for ranking protein hits.

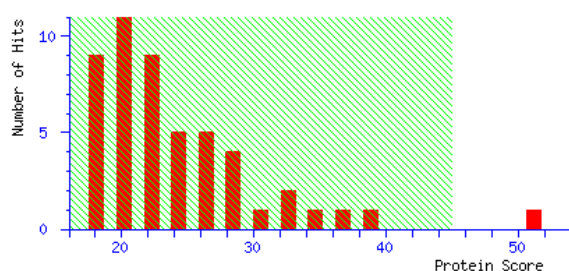

Matched peptide sequences: shown in **Bold Red**

```
1 MAEDEDNQQG QGEGCLKYLG FVQDAATYAVT TFSNVYLFAK DKSGPLQPGV
51 DIIEGPKVKNV AVPLYNRFSY IPNGALKFVD STVVASVTII DRSLPPIVKD
101 ASIQVVS AIR AAPEAARSLA SSLPGQTKIL AKVFGYEN
```

Spot No.: **141**

NCBI accession No.: **gi|14423688** Species: *Hevea brasiliensis*

Protein name: **Enolase 1**

**PMF** Mascot score: **165**

Sequence coverage %: **52**

Matched peptides No.: **22**

Total peptides No.: **64**

Calculated Mr: **48029**

Calculated pI: **5.57**

Probability Based Mowse Score:

Protein score is  $-10 \cdot \log(P)$ , where P is the probability that the observed match is a random event. Protein scores greater than 73 are significant ( $p < 0.05$ ).

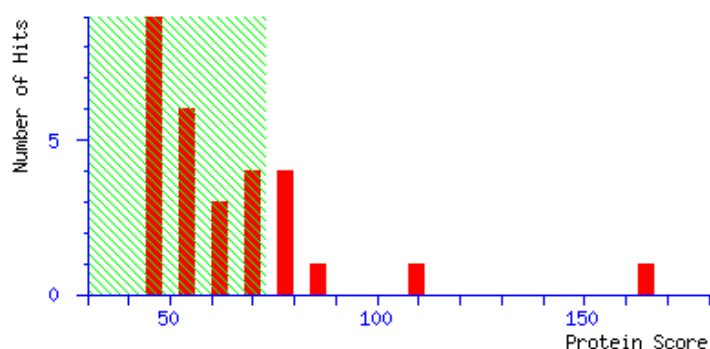

Matched peptide sequences: shown in **Bold Red**:

1 **MAITIVSVRA** **RQIFDSRGNP** **TVEADVKLSD** **GYLARAAVPS** **GASTGIYEAL**  
51 **ELRDGGSDYL** **GKGVSKAVEN** **VNIIIGPALV** **GKDPTDQVGI** **DNFMVQQLDG**  
101 **TVNEWGWCKQ** **KLGANAILAV** **SLAVCKAGAH** **VKGIPLYEHI** **ANLAGNKNLV**  
151 **LPVPAPFNVIN** **GGSHAGNKLA** **MQEFMILPVG** **ASSFKEAMKM** **GAEVYHHLKS**  
201 **VIKKKYQODA** **TNVGDEGGFA** **PNIQENKEGL** **ELLKTAIAKA** **GYTGKVVIGM**  
251 **DVAASEFYGS** **DQTYDLNFKE** **ENNNGSQKIS** **GEALKDLYKS** **FVAEYPIVSI**  
301 **EDPFDQDDWA** **HYAKLTSEIG** **EKVQIVGDDL** **LVTNPKRVEK** **AIKEKACNAL**  
351 **LLKVNQIGSV** **TESIEAVKMS** **KRAGWGMAS** **HRSGETEDTF** **IADLSVGLAT**  
401 **GQIKTGAPCR** **SERLAKYNQL** **LRIEEELGSE** **AVYAGANFRK** **PVEPY**

Spot No.: 142

NCBI accession No.: [gi|14423687](#) Species: *Hevea brasiliensis*

PFF score: [766]

Protein name: Enolase 2

Matched peptides No.: [10]

Sequence coverage %: [32]

Matched sequences: [K.LAMQEFMILPVGASSFK.E + Oxidation \(M\)](#);

[K.MGAEVYHHLK.S](#);

[K.MGAEVYHHLK.S + Oxidation \(M\)](#);

[K.YGQDATNVGDEGGFAPNIQENK.E](#);

[K.VVIGMDVAASEFYGSDK.T](#);

[K.VQIVGDDLLVTNPK.R](#);

[K.VNQIGSVTESIEAVK.M](#);

[R.AGWGVMASHR.S + Oxidation \(M\)](#);

[R.SGETEDTFIADLSVGLATGQIK.T](#);

[R.IEEELGAEAVYAGANFR.T](#)

Calculated Mr: 48112

Calculated pI: 5.92

Probability Based Mowse Score:

Ions score is  $-10 \cdot \log(P)$ , where P is the probability that the observed match is a random event. Individual ions scores  $> 45$  indicate identity or extensive homology ( $p < 0.05$ ). Protein scores are derived from ions scores as a non-probabilistic basis for ranking protein hits.

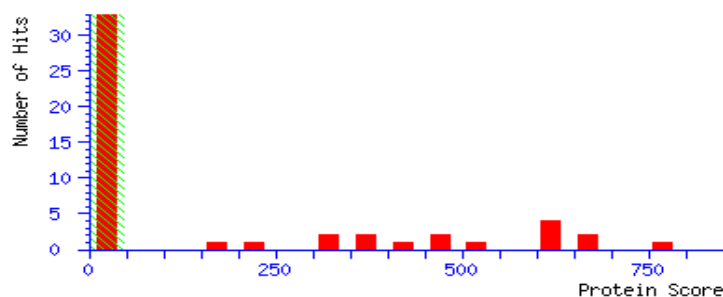

Matched peptide sequences: shown in **Bold Red**:

```
1  MAITIVSVRA  RQIFDSRGNP  TVEADVKLSD  GYLARAAVPR  GASTGIYEAL
51  ELRDGGSDYL  GKGVS KAVEN  VNIIIGPALV  GKDPTDQVGI  DNFMVQQLDG
101 TVNEGWCKQ  KLGANAILAV  SLAVCKAGAH  VKGIPLYKHV  ANLAGNKNLV
151 LPVPAFNVIN  GGSHAGNKLA  MQEFMILPVG  ASSFKEAMKM  GAEVYHHLKS
201 VIKKRYGQDA  TNVGDEGGFA  PNIQENKEGL  ELLKTAIAKA  GYTGKVVIGM
251 DVAASEFYGS  DKTYDLNFKE  ENNNGSQKIS  GDVLKDLYKS  FVTEYPIVSI
301 EDPFDQDDWE  HYAKLTSEIG  VKVQIVGDDL  LVTNPKRVEK  AIKEKACNAL
351 LLKVNQIGSV  TESIEAVKMS  KRAGWVMAS  HRSGETEDTF  IADLSVGLAT
401 GQIKTGAPCR  SERLAKYNQL  LRIEEELGAE  AVYAGANFRT  PVEPY
```



Spot No.: **143**

NCBI accession No.: **gi|333690873** Species: *Hevea brasiliensis*

PFF score: **[52]**

Protein name: **glutathione-S-transferase tau 1**

Matched peptides No.: **[2]** Sequence coverage %: **[10]**

Matched sequences: **K.YEYREEDLR.N;**

**K.DKSPFLPSDPYQR.A**

Calculated Mr: **25595**

Calculated pI: **5.48**

Probability Based Mowse Score:

Ions score is  $-10 \cdot \log(P)$ , where P is the probability that the observed match is a random event. Individual ions scores  $> 45$  indicate identity or extensive homology ( $p < 0.05$ ). Protein scores are derived from ions scores as a non-probabilistic basis for ranking protein hits.

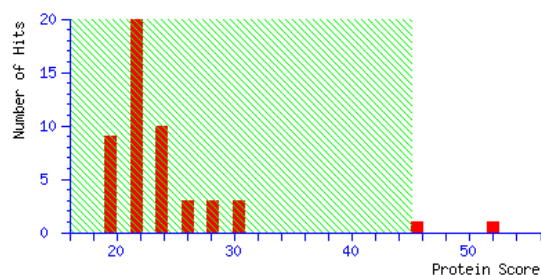

Matched peptide sequences: shown in **Bold Red**:

```
1 MAEEVILLDF WSPFGRMVR IALAEKGVKY EYREEDLRNK SPLLLQMNPFV
51 HKKIPVLIHN GKPICESLIA VQYVDEVWKD KSPFLPSDPY QRAQARFWAD
101 FIDKKIYDIG RKIWTTKGDE QEAAKKEFIE ALKLLEGELG NKPYFGGESH
151 GYVDVALIPF YSWFYAYETC GNFSIEPECP VLIAWAKRCL QKESVSESVP
201 DPEKVYEFVL VLKKKFGIE
```

Spot No.: **144**

NCBI accession No.: **gi|242080619** Species: *Sorghum bicolor*

Protein name: **hypothetical protein SORBIDRAFT\_07g003800**

**PMF** Mascot score: **82**

Sequence coverage %: **34**

Matched peptides No.: **13**

Total peptides No.: **69**

Calculated Mr: **43483**

Calculated pl: **8.78**

Probability Based Mowse Score:

Protein score is  $-10 \cdot \log(P)$ , where P is the probability that the observed match is a random event. Protein scores greater than 73 are significant ( $p < 0.05$ ).

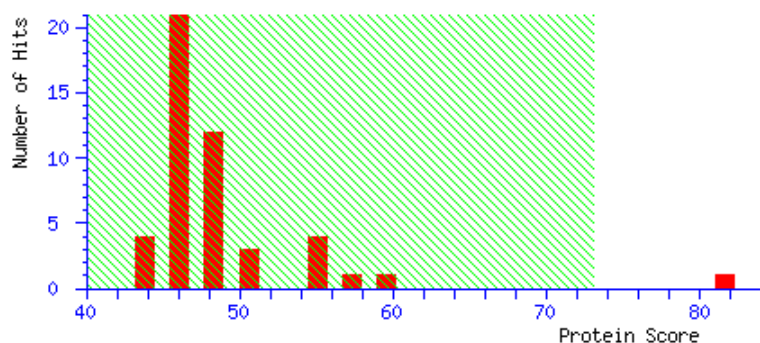

Matched peptide sequences: shown in **Bold Red**:

1 **MAEANVAAAS** **LFGADSR LCS** **ADILAPPEAK** VRARIEVAVL NFLAALASPS  
51 SPAISVLPLI SRSSANCSLR SGLLNDVSSV YLSHTFCKRS **LMHNP KAFVR**  
101 VWKVMEMCYK ILGEGKLVHQ **RELFYKLLSD** SPKYFSCQRH VNQAIQDVVS  
151 LLRCTRQSLG VMASSRGALI GRLVLHEPDE EQIDCSILGA SGHAITGDLN  
201 LLSKLNLS SD **ARYIIVVEKD** AIFQRLAEDR **LYNQLPCILI** **TAKGY PD IAT**  
251 **R FILHRLSQT** FPNMPIFALV DWNPAGLAIM CTYKYGSISM GLESYRYACN  
301 **VKWLGMRGDD** **LQLIPESAFQ** **VLKPRDLQTC** **TNYLRPQFHQ** **ESHRAELTLM**  
351 **VEKGK RADIE** ALYSHGFDYL GK YIARKIVQ GDYI

Spot No.: **145**

NCBI accession No.: **gi|30575570** Species: *Citrus x paradisi*

**PFF** score: **[87]**

Protein name: **HSP19 class II**

Matched peptides No.: **[1]** Sequence coverage %: **[15]**

Matched sequences: **K.VQVEDDNVLLISGER.K**

Calculated Mr: **11191**

Calculated pI: **8.01**

Probability Based Mowse Score:

Ions score is  $-10 \cdot \log(P)$ , where P is the probability that the observed match is a random event.

Individual ions scores  $> 45$  indicate identity or extensive homology ( $p < 0.05$ ).

Protein scores are derived from ions scores as a non-probabilistic basis for ranking protein hits.

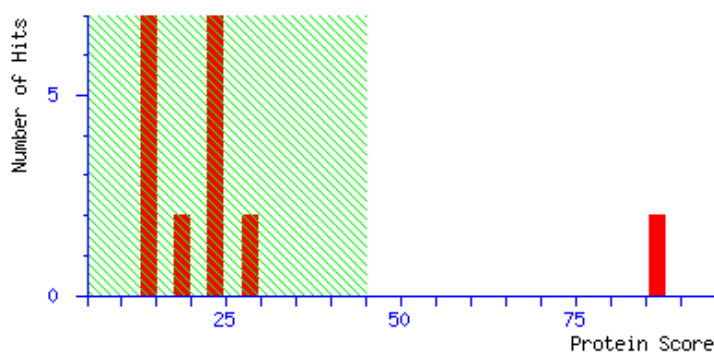

Matched peptide sequences: shown in **Bold Red**:

```
1 YVFIVDMPGL KSGDIKVQVE DDNVLLISGE RKREEEKDGA KYVRMERRVG  
51 KFMRRKFULPE NANVEAISAV CQDGVLTITV DKLPPPEPKK PKTIEVKIA
```

Spot No.: **146**

NCBI accession No.: **gi|37901124** Species: *Hevea brasiliensis*

**PFF** score: **[88]**

Protein name: **latex abundant protein 1**

Matched peptides No.: **[1]** Sequence coverage %: **[11]**

Matched sequences: **R.NKDDINCFNEYNPR.P**

Calculated Mr: **14618**

Calculated pI: **5.01**

Probability Based Mowse Score:

Ions score is  $-10 \cdot \log(P)$ , where P is the probability that the observed match is a random event. Individual ions scores  $> 43$  indicate identity or extensive homology ( $p < 0.05$ ). Protein scores are derived from ions scores as a non-probabilistic basis for ranking protein hits.

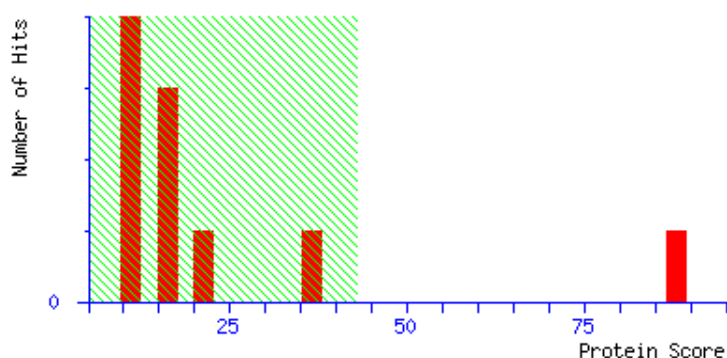

Matched peptide sequences: shown in **Bold Red**:

```
1  MPYYTRNKDD INCFNEYNPR  PYIGGYDMAL  TYGRPISACE  ETCYPRSSSA
51  NEIDYDYPDF  TWYVEPSAYN  DDHLQEEYTS  YARPKPRPAP  NSLGSCPILG
101 GNDEEKHHH  CHHQHEKHCD  DE
```

Spot No.: **147**

NCBI accession No.: **gi|359806300** Species: *Glycine max*

**PFF** score: **[173]**

Protein name: **uncharacterized protein LOC100784610**

Matched peptides No.: **[3]** Sequence coverage %: **[9]**

Matched sequences: **K.NTALHYAAGYGR.K;**

**R.YWNNEEVLQK.L;**

**R.TALHFACGYGEVK.C**

Calculated Mr: **38027**

Calculated pI: **4.53**

### Probability Based Mowse Score:

Ions score is  $-10 \cdot \log(P)$ , where P is the probability that the observed match is a random event. Individual ions scores  $> 45$  indicate identity or extensive homology ( $p < 0.05$ ). Protein scores are derived from ions scores as a non-probabilistic basis for ranking protein hits.

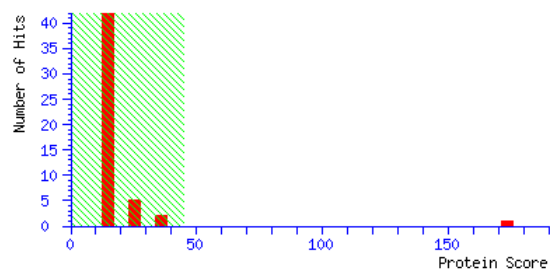

Matched peptide sequences: shown in **Bold Red**:

```
1 MASDSKKDFP ADDKAGTEES KTSKDETSSK DSPAEQRATA TFGPRPGPAG
51 HPGNPFDLA MSGLLNDFPSI KELAEQIAKD PSFNQMAEQL QKTFQGAPQD
101 AIPSFNQY FSTMQQVMQN PNFMTMAERL GNALMQDPSM SAMLESFSNP
151 SNKDQLEERM ARIKEDPSLK HILEELETGG PAAMMRYWNN EEVLQKLGQA
201 MGLANSGDAG ASAENSGADE TEDLGNEDES IVHHTASVGD VEGLKNALAS
251 GADKDEEDSE GRTALHFACG YGEVKCAQVL LEAGAKVDAL DKNKNTALHY
301 AAGYGRKECV ALLLENGAAV TLQNMDGKTP IDVAKLNNQN EVLKLEKDA
351 FL
```

Spot No.: **148**

NCBI accession No.: **gi|37625031** Species: *Vitis aestivalis*

**PFF** score: **[166]**

Protein name: **putative ankyrin-repeat protein**

Matched peptides No.: **[3]** Sequence coverage %: **[9]**

Matched sequences: **K.LNNQHEVLK.L;**

**K.NTALHYAAGYGR.K;**

**R.TALHFACGYGEVK.C**

Calculated Mr: **38089**

Calculated pI: **4.53**

### Probability Based Mowse Score:

Ions score is  $-10 \cdot \log(P)$ , where P is the probability that the observed match is a random event. Individual ions scores  $> 45$  indicate identity or extensive homology ( $p < 0.05$ ). Protein scores are derived from ions scores as a non-probabilistic basis for ranking protein hits.

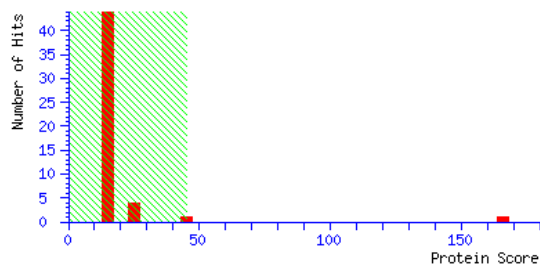

Matched peptide sequences: shown in **Bold Red**:

```
1 MASNSDKDTP AGSAENSKSD SSSGESHSQ RRAAAAASVP GAGLPTNPFD
51 FSAMTGLLND PSIKELAEQI AKDPAFNQMA EQLQKTFHGA AVEESIPQFD
101 TQQYYSTMQQ VMQNPQFMTM AERLGNALMQ DPSMSSMLEN LANPTHKDQL
151 EERMARIKED PSLKPILDEI ETGGPAAMMR YWNDKDV LQK LGEAMGLAVS
201 GDAAASADNS GLDEAEELAN EDESIAHHS ESIVHDTASV GDVEGLKNAL
251 ASGADKDEED SEGRTALHFA CGYGEVKCAQ ILVEAGATVD ALDKNKNTAL
301 HYAAGYGRKE CVALLENGA AVTLQNMDGK TPIDVAKLNN QHEVLKLLEK
351 DAFL
```

Spot No.: **149**

NCBI accession No.: **gi|13310811** Species: *Nicotiana tabacum*

**PFF** score: **[71]**

Protein name: **putative ankyrin-repeat protein**

Matched peptides No.: **[2]** Sequence coverage %: **[7]**

Matched sequences: **K.NTALHYAAGYGR.K;**

**R.TALHFACGYGEVK.C**

Calculated Mr: **37522**

Calculated pI: **4.45**

Probability Based Mowse Score:

Ions score is  $-10 \cdot \log(P)$ , where P is the probability that the observed match is a random event. Individual ions scores  $> 45$  indicate identity or extensive homology ( $p < 0.05$ ). Protein scores are derived from ions scores as a non-probabilistic basis for ranking protein hits.

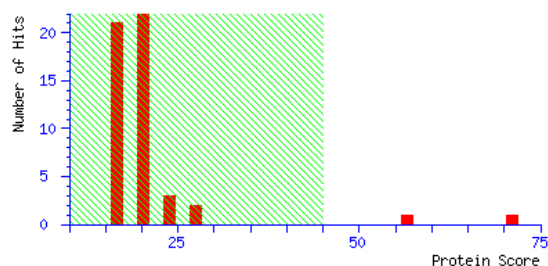

Matched peptide sequences: shown in **Bold Red**:

```
1  MSEGKVLPT  ASADEKSGAS  ENKKSSESSS  TEAPSGEART  TSTAAAGAGL
51  QNPFDFSAMS  GLLNDPSIKE  LAEQIAKDPA  FNQMAEQLQK  TFQGAAVEES
101 VPNFDSQQYY  STMQQVMQNP  QFMTMAERLG  NALMQDPSMS  GMLESLSNPA
151 QKEQIEERMA  RIKEDPSLKP  ILEEIESGGP  AAMMRYWNDQ  ETLKKIGEAM
201 GFAAGGEGAT  SSAIPGTDET  EEANEDESUV  HQCASVGDAE  GLKAALTAGA
251 DKDEEDSEGR  TALHFACGYG  EVKCAQILLE  AGAKVDALDK  NKNTALHYAA
301 GYGRKECVAL  LLENGAAVTL  QNLDGKTPID  VAKLNNQGEV  LKLEKDVFL
```

Spot No.: **150**

NCBI accession No.: [gi|129916](#) Species: *Triticum aestivum*

**PFF** score: **[180]**

Protein name: **Phosphoglycerate kinase, cytosolic**

Matched peptides No.: **[3]** Sequence coverage %: **[7]**

Matched sequences: [K.KPFAAIVGGSK.V](#);

[K.LASVADLYVNDAFGTAHR.A](#);

[K.KLASVADLYVNDAFGTAHR.A](#)

Calculated Mr: **42153**

Calculated *pI*: **5.64**

### Probability Based Mowse Score:

Ions score is  $-10 \cdot \log(P)$ , where P is the probability that the observed match is a random event. Individual ions scores  $> 45$  indicate identity or extensive homology ( $p < 0.05$ ). Protein scores are derived from ions scores as a non-probabilistic basis for ranking protein hits.

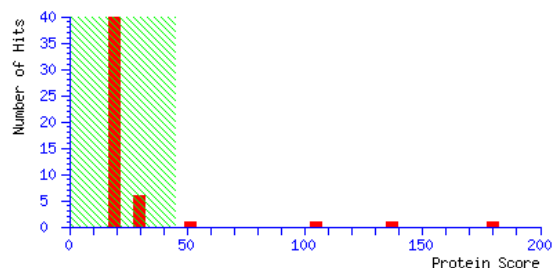

Matched peptide sequences: shown in **Bold Red**:

```
1  MATKRSVGTL  GEADLKGKKV  FVRADLNVPL  DDAQKITDDT  RIRASIPTIK
51  YLLEKGAKVI  LASHLGRPKG  VTPKFSLKPL  VARLSELLGL  EVVMAPDCIG
101 EEVEKLAAAL  PDGGVLLLEN  VRFYKEEEKN  DPEFAKKLAS  VADLYVNDAF
151 GTAHRAHAST  EGVTKFLRPS  VAGFLMQKEL  DYLVGAVANP  KKPFAAIVGG
201 SKVSSKIGVI  ESLLAKVDIL  ILGGGMIFTF  YKAQGLAVGK  SLVEEDKLEL
251 ATSLIETAKS  KGVKLLLPTD  VVVADKFAAD  AESKIVPATA  IPDGWMGLDV
301 GPDSIKTFAE  ALDTTKTVIW  NGPMGVFEFE  KFAAGTDAIA  KQLAELTGKG
351 VTTIIGGGDS  VAAVEKAGLA  DKMSHISTGG  GASLELLEGG  PLPGVLALDE
401  A
```



Spot No.: **151**

NCBI accession No.: **gi|378464888**

Species: *Ammopiptanthus mongolicus*

PFF score: **[117]**

Protein name: **translation elongation factor**

Matched peptides No.: **[2]**

Sequence coverage %: **[11]**

Matched sequences: **R.WFNHIDALLR.I;**

**K.SSVLLDVKPWDDETDMK.K**

Calculated Mr: **25300**

Calculated pI: **4.50**

Probability Based Mowse Score:

Ions score is  $-10 \cdot \log(P)$ , where P is the probability that the observed match is a random event. Individual ions scores  $> 45$  indicate identity or extensive homology ( $p < 0.05$ ). Protein scores are derived from ions scores as a non-probabilistic basis for ranking protein hits.

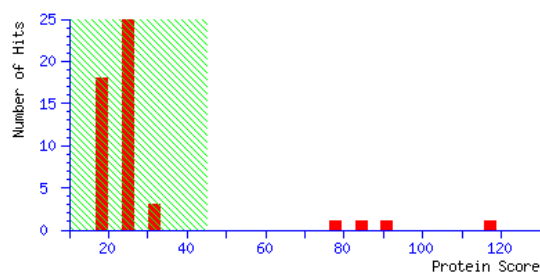

Matched peptide sequences: shown in **Bold Red**:

```
1  MVLTLYNLSS  EPGLKKLDEY  LLSRSYITGY  QASKDDLTVY  AALPEVPSDK
51  YVNVSRWFNH  IDALLRISGV  SGEGSGVTVE  GSAPVAEETI  ATPPAADTKA
101 TAAEDDDDDV  DLFGEETEE  KKAEEERAAS  VKASVKKKES  GKSSVLLDVK
151 PWDETDMKK  LKEAVRSVSM  EGLHWGASKL  VPGYGIIKKL  QIMLTIVDDL
201 VSVDNLIEEQ  LQVEPINEYV  QSCDIVAFNK  I
```

Spot No.: **152**

NCBI accession No.: **gi|225456295** Species: *Vitis vinifera*

**PFF** score: **[107]**

Protein name: **elongation factor 1-delta-like**

Matched peptides No.: **[4]**

Sequence coverage %: **[17]**

Matched sequences: **K.APSSEYVNVSR.W;**

**R.SIKMEGLLWGASK.L;**

**R.SIKMEGLLWGASK.L + Oxidation (M);**

**K.SSVLLDVKPWDDETDMK.K**

Calculated Mr: **25060**

Calculated pI: **4.50**

Probability Based Mowse Score:

Ions score is  $-10 \cdot \log(P)$ , where P is the probability that the observed match is a random event. Individual ions scores  $> 45$  indicate identity or extensive homology ( $p < 0.05$ ). Protein scores are derived from ions scores as a non-probabilistic basis for ranking protein hits.

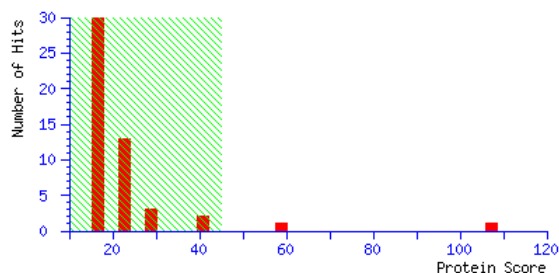

Matched peptide sequences: shown in **Bold Red**:

```
1 MAVTFYGVNS GSGLKKLDEY LLRSYISGY QASKDDITVH AALSKAPSSE
51 YVNVSRWYNH IESLLRISGV SGEKCGVTIE GFAPVDAVAT PPAEDTKATA
101 AEDDDDDVD LFGEETEEEK KAAEAAAAV KASGKKKESG KSSVLLDVKP
151 WDDETDMKKL EEAVRSIKME GLLWGASKLV PVGYGIKKLQ IMLTIVDDL
201 SVDDLIEEQL TVEPTNEYVQ SCDIVAFNKI
```

Spot No.: **153**

NCBI accession No.: **gi|22261807** Species: *Solanum tuberosum*

**PFF** score: **[132]**

Protein name: **Light-induced protein, chloroplastic**

Matched peptides No.: **[1]** Sequence coverage %: **[8]**

Matched sequences: **K.FEEGIIGTPQLTDSIVLPENVEFLGQK.I**

Calculated Mr: **35671**

Calculated pI: **5.26**

### Probability Based Mowse Score:

Ions score is  $-10 \cdot \log(P)$ , where P is the probability that the observed match is a random event. Individual ions scores  $> 45$  indicate identity or extensive homology ( $p < 0.05$ ). Protein scores are derived from ions scores as a non-probabilistic basis for ranking protein hits.

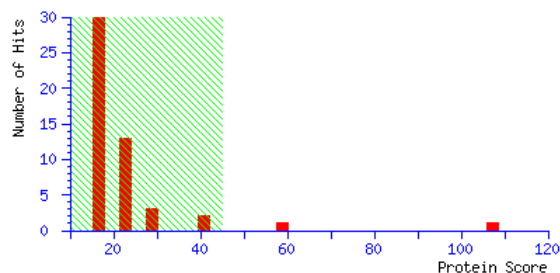

Matched peptide sequences: shown in **Bold Red**:

```
1 MAVTFYGVNS GSGLKKLDEY LLRSYISGY QASKDDITVH AALSKAPSSE
51 YVNVSRWYNH IESLLRISGV SGEGCGVTIE GFAPVDAVAT PPAEDTKATA
101 AEDDDDDVD LFGREETEEK KAAEAAAAV KASGKKKESG KSSVLLDVKP
151 WDEETDMKKL EEAVRSIKME GLLWGASKLV PVGYGIKKLQ IMLTIVDDLQ
201 SVDDLIEEQL TVEPTNEYVQ SCDIVAFNKI
```

Spot No.: **154**

NCBI accession No.: **gi|345103803** Species: *Gossypium thurberi*

Protein name: **14-3-3-like protein, partial**

**PMF** Mascot score: **83**

Sequence coverage %: **37**

Matched peptides No.: **11**

Total peptides No.: **41**

Calculated Mr: **28861**

Calculated pI: **4.82**

Probability Based Mowse Score:

Protein score is  $-10 \cdot \log(P)$ , where P is the probability that the observed match is a random event. Protein scores greater than 73 are significant ( $p < 0.05$ ).

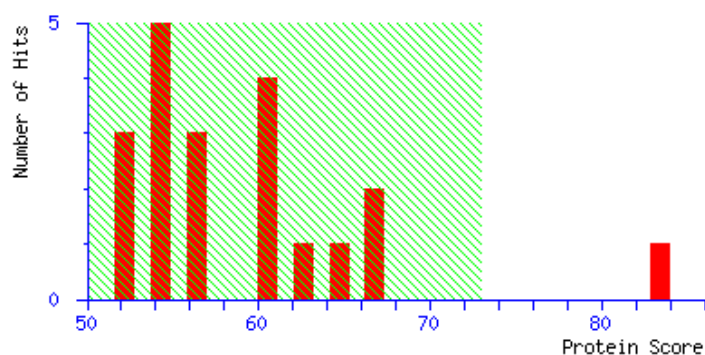

Matched peptide sequences: shown in **Bold Red**:

1 MEKERE**QQVY** **LARLAEQAER** YDEMVEAMKS VAKLDVELTV **EERNLLSVGY**  
51 **KNVIGARRAS** **WRILSSIEQK** EEAKGNEQNV KRIKDYRQRV EDELSKICND  
101 ILSVIDKHLI PSSSTGESTV FYYKMKGDYF **RYLAEFKAGD** DRKEAADQSL  
151 **KAYEAATSTA** **SSDLPPTHPI** **RLGLALNFSV** FYYEILNSPE RACHLAK**QAF**  
201 **DEAIAELDSL** **NEESYKDSL** **IMQLLRDNL** LWTSDLPEEG GEQSKADEPQ  
251 AE

Spot No.: **155**

NCBI accession No.: **gi|326694865** Species: *Hevea brasiliensis*

PFF score: **[384]**

Protein name: **14-3-3 protein 2**

Matched peptides No.: **[9]**

Sequence coverage %: **[32]**

Matched sequences: **R.GNEDHVTIK.E;**

**K.DSTLIMQLLR.D;**

**K.DSTLIMQLLR.D + Oxidation (M);**

**R.YEEMVEFMEK.V;**

**R.YEEMVEFMEK.V + Oxidation (M),K.TVDVEELTVEER.N;**

**K.SAQDIALADLAPTHPIR.L;**

**K.LAEQAERYEEMVEFMEK.V;**

**R.LGLALNFSVFYYEILNSPDR.A**

Calculated Mr: **35671**

Calculated pI: **5.26**

Probability Based Mowse Score:

Ions score is  $-10 \cdot \log(P)$ , where P is the probability that the observed match is a random event. Individual ions scores  $> 45$  indicate identity or extensive homology ( $p < 0.05$ ). Protein scores are derived from ions scores as a non-probabilistic basis for ranking protein hits.

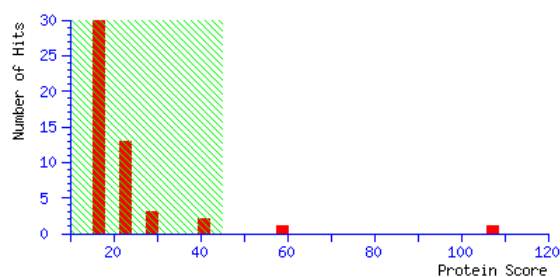

Matched peptide sequences: shown in **Bold Red**:

```
1 MAVTFYGVNS GSKLKKLDEY LLRSYISGY QASKDDITVH AALSKAPSSE
51 YVNSRWYNH IESLLRISGV SGEGCGVTIE GFAPVDAVAT PPAEDTKATA
101 AEDDDDDVD LFGREETEEK KAAEARAAAV KASGKKKESG KSSVLLDVKP
151 WDEETDMKKL EEAVRSIRME GLLWGASKLV PVGYGIKKLQ IMLTIVDDLQ
201 SVDDLIEEQL TVEPTNEYVQ SCDIVAFNKI
```

Spot No.: **156**

NCBI accession No.: **gi|225458231** Species: *Vitis vinifera*

**PFF** score: **[53]**

Protein name: **PREDICTED: proteasome subunit alpha type-1-B**

Matched peptides No.: **[3]** Sequence coverage %: **[17]**

Matched sequences: **K.VDDHIGVAIAGLTADGR.V;**

**R.NQYDTDVTTWSPAGR.L;**

**R.SECINYSFTYESPLPVGR.L**

Calculated Mr: **30912**

Calculated pI: **5.02**

### Probability Based Mowse Score:

Ions score is  $-10 \cdot \log(P)$ , where P is the probability that the observed match is a random event. Individual ions scores  $> 45$  indicate identity or extensive homology ( $p < 0.05$ ). Protein scores are derived from ions scores as a non-probabilistic basis for ranking protein hits.

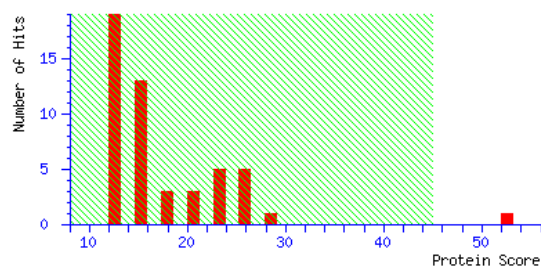

Matched peptide sequences: shown in **Bold Red**:

```
1 MFRNQYDTDV TTWSPAGRLF QVEYAMEAVK QGSAAIGLRS KTHVVLACVN
51 KANSELSSHQ KKIFKVDDHI GVAIAGLTAD GRVLSRYMRS ECINYSFTYE
101 SPLPVGRLVV QLADKAQVCT QRSWKRPYGV GLLVAGLDES GAHLYNCPS
151 GNYFEYQAFA IGSRSQAAKT YLERRFGTFQ NSSREDLIKD ALFAIRETLQ
201 GEKLKSSICT VTVLGVGEPF HILDQETVQG LINAFEMAGE EAPAADQGAA
251 GEEGAAGEVV AAAEEGAAPE EGAATEEGAA PMDI
```

Spot No.: **157**

NCBI accession No.: **gi|211906514** Species: *Gossypium hirsutum*

**PFF** score: **[80]**

Protein name: **lactoylglutathione lyase**

Matched peptides No.: **[3]**

Sequence coverage %: **[6]**

Matched sequences: **K.FYTECFGMK.L;**

**K.FYTECFGMK.L + Oxidation (M);**

**K.ITSFLDPDGWK.T**

Calculated Mr: **32609**

Calculated *pI*: **5.69**

### Probability Based Mowse Score:

Ions score is  $-10 \cdot \log(P)$ , where *P* is the probability that the observed match is a random event. Individual ions scores > 45 indicate identity or extensive homology ( $p < 0.05$ ). Protein scores are derived from ions scores as a non-probabilistic basis for ranking protein hits.

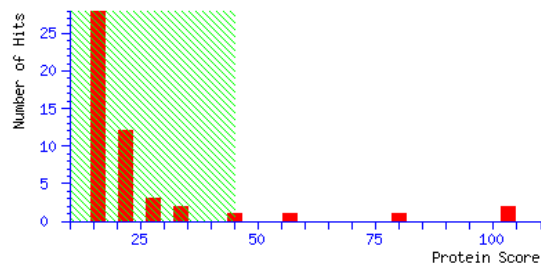

Matched peptide sequences: shown in **Bold Red**:

```
1 MAEGSAAVPS TELLEWPKKD KRRFLHAVYR VGDLDRTIKF YTECFGMKLL
51 RKRDIPEEKY SNAFLGFGPE ESHFVVELTY NYGVTSYDIG TGFGHFIAIAT
101 PDVYKMVEDI RAKGGNITRE PGPVKGSSV IAFVKDPDGY IFELIQRAS
151 PEPLCQVMLR VGDLDRSVKF YEKALGMKLV KKVDRPEYKY SIAMMGYAE
201 HETTIVLELTY NYGVTEYTKG NAYAQVAIST DDVYKSGEVV EHVIQELGGK
251 VTRKPGPIPG INTKITSFLD PDGWKTVLVD NEDFLKELK
```

Spot No.: **159**

NCBI accession No.: **gi|340033945** Species: *Crithmum maritimum*

Protein name: **ATP synthase CF1 beta subunit**

**PMF** Mascot score: **83**

Sequence coverage %: **29**

Matched peptides No.: **15**

Total peptides No.: **69**

Calculated Mr: **53692**

Calculated pI: **5.08**

Probability Based Mowse Score:

Protein score is  $-10 \cdot \log(P)$ , where P is the probability that the observed match is a random event. Protein scores greater than 73 are significant ( $p < 0.05$ ).

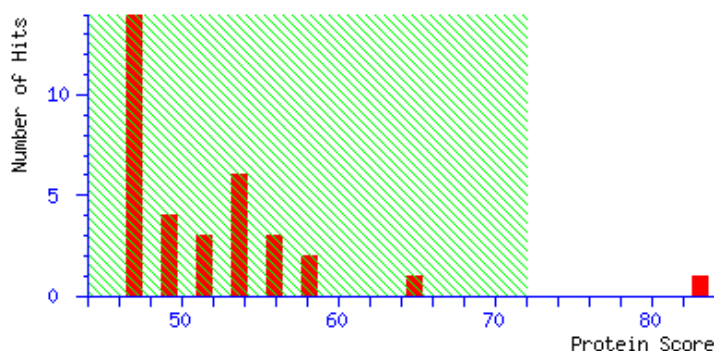

Matched peptide sequences: shown in **Bold Red**:

```
1  MRINPTTSS VASTLEKKNL GNITQIIGPV LDVAFPPGKM PNIYNALVVK
51  GRDTAGQQIN VTCEVQQLLG NNRVRVAVAMS ATDGLTRGME VIDTGAPLSV
101 PVGGTTLGRI FNVLGEPVDN LGPVDTRTTS PIHRSAFAFI QLDTKLSIFE
151 TGIKVVDDLLA PYRRGGKIGL FGGAGVGKTV LIMELINNIA KAHGGVSVFG
201  GVGERTREGN DLYMEMKESG VINEENIAES KVALVYGQMN EPPGARMRVG
251  LTALTMAEYF RDVNEQDVLL FIDNIFRFVQ AGSEVSALLG RMPSAVGYQP
301 TLSTEMGTLQ ERITSTKEGS ITSIQAVYVP ADDLTDPAFA TTFALHDATT
351 VLSRGLAAKG IYPAVDPLDS TSTMLQPRIV GEDHYETAQR VKQTLQRYKE
401 LQDIIAILGL DELSEEDRLT VARARKIERF LSQPPFVAEV FTGSPGKYVG
451 LAETIIGFRL ILSGELDSL P EQAFYLVGNI DEATAKAMNL EMESNSNK
```



Spot No.: **160**

NCBI accession No.: [gi|4388534](#) Species: *Sorghum bicolor*

Protein name: F1-ATP synthase, beta subunit

PMF Mascot score: **84**

Sequence coverage %: **19**

Matched peptides No.: **8**

Total peptides No.: **20**

Calculated Mr: **49239**

Calculated pl: **5.41**

Probability Based Mowse Score:

Protein score is  $-10 \cdot \log(P)$ , where P is the probability that the observed match is a random event. Protein scores greater than 73 are significant ( $p < 0.05$ ).

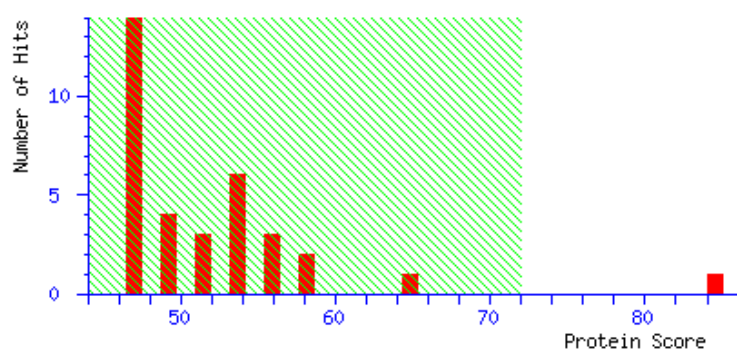

Matched peptide sequences: shown in **Bold Red**:

```
1 IGQVCQVIGA VVDVRFDEGL PPILTALEVL DNNIRLVLEV AQHLGENMVR
51 TIAMDGTEGL VRGQRVLNTG SPITVPVGRA TLGRIINVIG EPIDERGDIT
101 TNHFLPIHRE APAFVEQATE QQILVTGIKV VDLLAPYQRG GKIGLFGGAG
151 VGKTVLIMEL INNVAKAHGG FSVFAGVGER TREGNDLYRE MIESGVIKLG
201 DKQSESKCAL VYGQMNEPPG ARARVGLTGL TVAEHFRDAE GQDVLLFIDN
251 IFRFTQANSE VSALLGRIPS AVGYQPTLAT DLGGLQERIT TTKKGSITSV
301 QAIYVPADDL TDPAPATTYA HLDATTVLSR QISERGIYPA VDPLDSTSRM
351 LSPHVLGEDH YNTARGVQKV LQKYKNLQDI IAILGMDELS EDDKLTVARA
401 RKIQRFLSQP FHVAEVFTGA PGKYVELKES VKSFQGVLDG KYDDLPAQSF
451 YMVG
```

Spot No.: **161**

NCBI accession No.: **gi|147805616** Species: *Vitis vinifera*

**PFF** score: **[136]**

Protein name: **hypothetical protein VITISV\_028800**

Matched peptides No.: **[3]** Sequence coverage %: **[10]**

Matched sequences: **R.GPYPADQVVR.D;**

**R.DRGPYPADQVVR.D;**

**K.TANEVIIVIEAYR.T**

Calculated Mr: **27385**

Calculated *pI*: **5.64**

### Probability Based Mowse Score:

Ions score is  $-10 \cdot \log(P)$ , where *P* is the probability that the observed match is a random event. Individual ions scores > 45 indicate identity or extensive homology ( $p < 0.05$ ). Protein scores are derived from ions scores as a non-probabilistic basis for ranking protein hits.

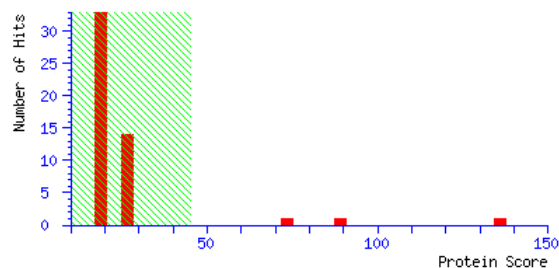

Matched peptide sequences: shown in **Bold Red**:

```
1  MLAVFHKSIA  EAPEGLRTPD  SASLPALKDG  FLPQFFASLH  PSAVTVNLGS
51  SGAISYSVDK  QNPLLPRLFA  VDDIFCLFQ  GHIENVALLK  QQYGLNKTAN
101 EVIIVIEAYR  TLRDRGPYPA  DQVVRDLHGK  FAFVLYDSSN  RTAFLAADAD
151  ESVPPFFWVD  SEGHLVLSDD  EETVKKGCGK  SFAPFPKGC  FTTSGGLRSF
201  EHPLNELRAE  PRVDSSGQVC  GANFKVDVEA  KKETGMPRVG  SAANWSTHY
```

Spot No.: **162**

NCBI accession No.: **gi|326492265**

Species: *Hordeum vulgare subsp. vulgare*

Protein name: **predicted protein**

**PMF** score: **83**

Sequence coverage %: **10**

Matched peptides No.: **58**

Total peptides No.: **32**

Calculated Mr: **54666**

Calculated *pI*: **8.89**

Probability Based Mowse Score:

Protein score is  $-10 \cdot \log(P)$ , where *P* is the probability that the observed match is a random event  
Protein scores greater than 73 are significant ( $p < 0.05$ ).

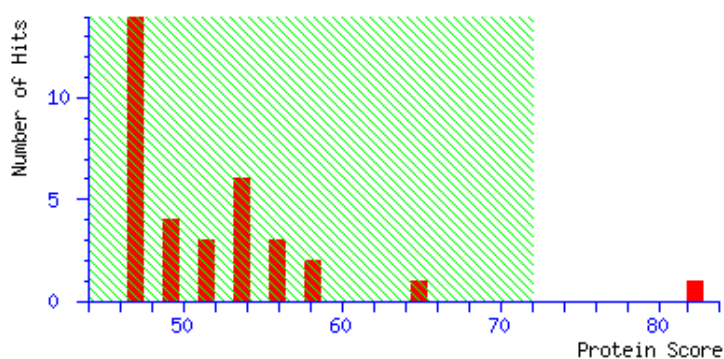

Matched peptide sequences: shown in **Bold Red**:

```
1  MSPYAVLVAV  LLAFFYAVWK  ARGSSSSSSS  RLPPSPPSRP  LLGHLHLLGQ
51  LPHRSLRELH  ARYGTDGGLL  LLQLGRRRTL  VVSTAAAAAD  LYKNHDLAFA
101 SRVPSVPVDK  LTYGSINISF  SPYGDVWRRS  KKIADVHLLS  PRRVDSFAPV
151 RAVEVAALVA  GARRGAEAGE  SVELRELLCA  YSNAVVTTRAT  TGAAGATAEK
201 LNKLLGNSAA  LMSGLQADDV  LPGAAAKVVR  WATGLEKRLD  AELELWDKFL
251 SQIIAEHLEK  KKCDGSAGEE  DFLDVLLRLR  EEGGAGLELT  DDRISIIKD
301 IIAAGTDTSS  VTLEWAMAEL  AGNPRAMAKL  QDEITRVTQG  KPTIQEADLS
351 RMEYLKAVLK  EVLRLHPAAP  LLVPHQSTTT  AVVQGYEIPA  KTALFVNAWA
401 IGRDPAAWGA  TAEEFRPERF  LGSFGAEGVD  LRGNDYQLLP  FGAGRRLCPG
451 IGFAMPVLEI  ALSSLVRHFD  WELPAGARLD  MSEAPGLTTP  LLAPLRLVPK
501 CRRQQ
```

Spot No.: **163**

NCBI accession No.: **gi|225428086** Species: *Vitis vinifera*

PFF score: **[343]**

Protein name: **V-type proton ATPase subunit B 1**

Matched peptides No.: **[10]** Sequence coverage %: **[30]**

Matched sequences: **K.YQEIVNIR.L;**

**K.FVAQGAYDTR.N;**  
**R.RGQVLEVDGEK.A;**  
**K.YTTVQFTGEVLK.T;**  
**R.QIYPPINVLPSLSR.L;**  
**R.VTLFLNLANDPTIER.I;**  
**R.GYPGYMYTDLATYER.A;**  
**R.RDHADVSNQLYANYAIGK.D;**  
**K.IPLFSAAGLPHNEIAAQICR.Q;**  
**K.AVVGEEALSSDLLYLEFLDKFER.K**

Calculated Mr: **54367**

Calculated pl: **5.04**

Probability Based Mowse Score:

#### Mascot Score Histogram

Ions score is  $-10 \cdot \log(P)$ , where P is the probability that the observed match is a random event. Individual ions scores  $> 45$  indicate identity or extensive homology ( $p < 0.05$ ). Protein scores are derived from ions scores as a non-probabilistic basis for ranking protein hits.

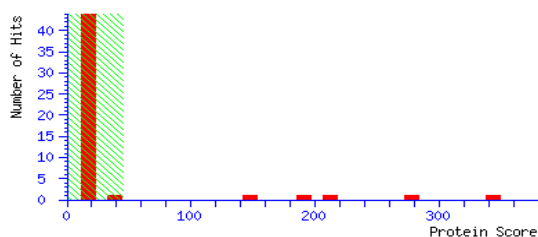

Matched peptide sequences: shown in **Bold Red**:

```
1  MGVEQNNHDA  EEGTLLVGME  YRTVSGVAGP  LVILEKVKGP  KYQEIVNIRL
51  GDGTTRRGQV  LEVDGEKAVV  QVFEGTSGID  NKYTTVQFTG  EVLKIPVSLD
101 MLGRIFNGSG  KPIDNGPPIL  PEAYLDISGS  SINPSERTYP  EEMIQTGIST
151 IDVMNSIARG  QKIPLFSAAG  LPHNEIAAQI  CRQAGLVKRL  EKSGSLEDV
201 EEDNFAIVFA  AMGVMETAQ   FFKRDFEENG  SMERVTLFLN  LANDPTIERI
251 ITPRIALTTA  EYLAYECGKH  VLVILTMSS   YADALREVS   AREEVPGRRG
301 YPGYMYTDLA  TIYERAGRIE  GRKGSITQIP  ILTMPNDDIT  HPTPDLTGYI
351 TEGQIYIDRQ  LHNRQIYPPI  NVLPSLSRLM  KSAIGEGMTR  RDHADVSNQL
401 YANYAIGKDV  QAMKAVVGEE  ALSSDLLYL  EFLDKFERKF  VAQGAYDTRN
451 IFQSLDLAWT  LLRIFFPRELL  HRIPAKTLDQ  YYSREASN
```

Spot No.: 164

NCBI accession No.: [gi|225428086](#) Species: *Vitis vinifera*

PFF score: [377]

Protein name: V-type proton ATPase subunit B 1

Matched peptides No.: [10] Sequence coverage %: [23]

Matched sequences: [K.YQEIVNIR.L](#);

[K.FVAQGAYDTR.N](#);  
[R.DFEENGSMER.V](#);  
[R.RGQVLEVDGEK.A](#);  
[R.KFVAQGAYDTR.N](#);  
[K.YTTVQFTGEVLK.T](#);  
[R.QIYPPINVLPSLSR.L](#);  
[R.VTLFLNLANPTIER.I](#);  
[R.GYPGYMYTDLATIYER.A](#);  
[R.RDHADVSNQLYANYAIGK.D](#)

Calculated Mr: 54367

Calculated pI: 5.04

Probability Based Mowse Score:

#### Mascot Score Histogram

Ions score is  $-10 \cdot \log(P)$ , where P is the probability that the observed match is a random event. Individual ions scores  $> 45$  indicate identity or extensive homology ( $p < 0.05$ ). Protein scores are derived from ions scores as a non-probabilistic basis for ranking protein hits.

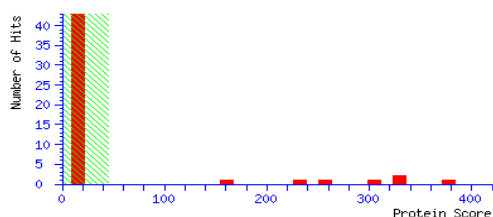

Matched peptide sequences: shown in **Bold Red**:

```
1  MGVEQNNHDA  EEGILLVGME  YRTVSGVAGP  LVILEKVKGP  KYQEIVNIRL
51  GDGTTRRGQV  LEVDGEKAVV  QVFEGTSGID  NKYTTVQFTG  EVLKTPVSLD
101 MLGRIFNGSG  KPIDNGPPIL  PEAYLDISGS  SINPSERTYP  EEMIQTGIST
151 IDVMNSIARG  QKIPLFSAAG  LPHNEIAAQI  CRQAGLVKRL  EKSGSLEDV
201 EEDNFAIVFA  AMGVNMETAQ  FFKRDFEENG  SMERVTLFLN  LANDPTIERI
251 ITPRIALTTA  EYLAYECGKH  VLVILTMSS  YADALREVSA  AREEVPGRRG
301 YPGYMYTDLA  TIYERAGRIE  GRKGSITQIP  ILTMPNDDIT  HPTPDLTGVI
351 TEGQIYIDRQ  LHNRQIYPPI  NVLPSLSRLM  KSAIGEGMTR  RDHADVSNQL
401 YANYAIGKDV  QAMKAVVGEE  ALSSEDLLEY  EFLDKFERKF  VAQGAYDTRN
451 IFQSLDLAWT  LLRIFPRELL  HRIPAKTLDQ  YYSREASN
```

Spot No.: **165**

NCBI accession No.: **gi|224071449** Species: *Populus trichocarpa*

PFF score: **[59]**

Protein name: **predicted protein**

Matched peptides No.: **[1]**

Sequence coverage %: **[2]**

Matched sequences: **K.IDVIPHYPGRL**

Calculated Mr: **47121**

Calculated pI: **5.28**

Probability Based Mowse Score:

Ions score is  $-10 \cdot \log(P)$ , where P is the probability that the observed match is a random event. Individual ions scores  $> 44$  indicate identity or extensive homology ( $p < 0.05$ ). Protein scores are derived from ions scores as a non-probabilistic basis for ranking protein hits.

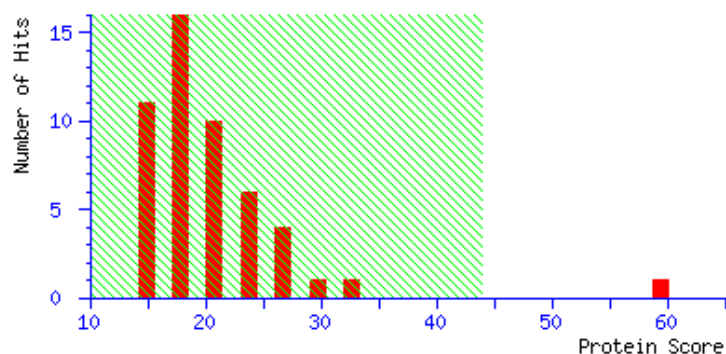

Matched peptide sequences: shown in **Bold Red**:

```
1  MDGTSEATWP  EILGSRNWDN  LLDPLDLSLR  KLILRCGDFC  QATYDAFNND
51  QNSRYCGTSR  YGKRNFHFKV  MLDNPENYQV  SSFLYATARV  SLPEAFLLHS
101 LSRDSDWRET  NWIGYIAVTS  DEQTKTLGRR  EIYIAFRGTT  RNYEWDILG
151 AKLKSAPLL   RGATSTTHDQ  ESSSSDDEDD  DKVPKVMLGW  LTMYSISDDPN
201 SPFTKLSARA  QLLAHIKELR  ERYKDDDLSE  IFTGHSLGAS  LSILSAFDLV
251 ENGITDIPVS  AFVFGSPQVG  NKEFNERFNK  YPNLKVLHIK  NKIDVIPHYP
301 GRLMGYVYTG  IEFIDTRKS  PSLKDSKNPS  DWHNLQAMLH  IVAGWNGEEQ
351 EFELKVKRSL  ALVNKSSEFL  KDECLVPGIW  WVEKNKGMVR  NEDGEWVLAP
401 PDEEDLPVPE  C
```

Spot No.: **166**

NCBI accession No.: **gi|116789736** Species: *Picea sitchensis*

Protein name: **unknown**

**PMF** Mascot score: **81**

Sequence coverage %: **60**

Matched peptides No.: **6**

Total peptides No.: **48**

Calculated Mr: **13436**

Calculated pI: **5.91**

Probability Based Mowse Score:

Protein score is  $-10 \cdot \log(P)$ , where P is the probability that the observed match is a random event. Protein scores greater than 73 are significant ( $p < 0.05$ ).

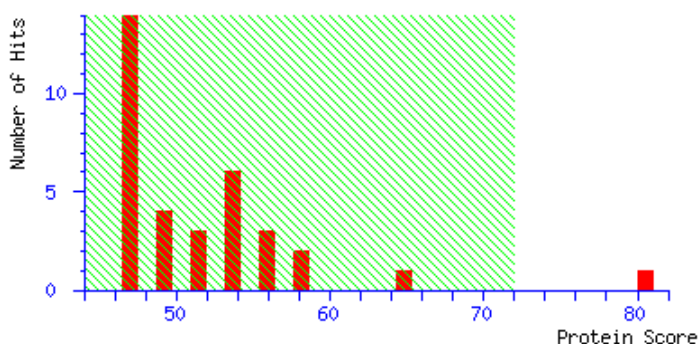

Matched peptide sequences: shown in **Bold Red**:

```
1  MPSHSLIGTT TTNRRGSMED YPNPFPNETI HELFKLVWSQ TNKARAQKEG  
51 GETELEVGAA ASKKTRTTTA NSNALKLSCE FLRLFVTEAV QRAAIVAEVE  
101 GSTQIEGTHL ERILPQLLLD F
```



Spot No.: 167

NCBI accession No.: [gi|115392253](#)

Species: *Cercocarpus betuloides*

PFF score: [51] Protein name: polyphenol oxidase

Matched peptides No.: [1] Sequence coverage %: [3]

Matched sequences: [K.EKEQEEEEILVIEGIEFDR.D](#)

Calculated Mr: 51023

Calculated pI: 5.98

Probability Based Mowse Score:

Ions score is  $-10 \cdot \log(P)$ , where P is the probability that the observed match is a random event. Individual ions scores  $> 45$  indicate identity or extensive homology ( $p < 0.05$ ). Protein scores are derived from ions scores as a non-probabilistic basis for ranking protein hits.

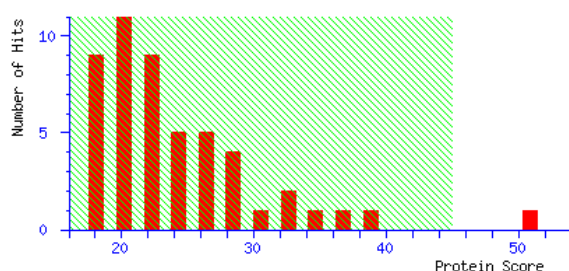

Matched peptide sequences: shown in **Bold Red**:

```
1 PFAFAKPVAP PDVSKCGAAD LPTGAQPTNC CPPVASKIID FKLPSPTPLR VRPAAHAVDK
61 AYIEKYSKAI ELMKALPDDD PRSFKQQANV HCAYCDGAYD QAGFPDLELQ IHNSWLFFPF
121 HRYLYPFHEK ILGSLIGDPT FALPFWNWDA PAGMPLPAIY ANPKSPLYDK FRAANHQPPT
181 LVDLDFNGTE DAASNETQIN ANLKIMYRQM VSNARTPQLF FGNPYRAGDE FDPGGGSIEG
241 TPHGPFVHLWT GDNTQPNFED MGNFYASGRD PIFFAHHSNV DRLWSIWKTL GGKRTDITDT
301 DWLDSGFLFY DENAQMVRVK VRDCLESKNL GYVYQDANIP WLESKPTPRR VKAALGKIAK
361 KLHVAHAADN SSASKVVARA AFPIAKLDTK MSTVVARPKQ KKRSKKEKEQ EEEILVIEGI
421 EFDRDVAVKF DVYVNDEDDL PSGPDKSEFA GSFVS
```



Spot No.: 168

NCBI accession No.: [gi|225430941](#)

Species: *Vitis vinifera*

PFF score: [210]

Protein name: [regulator of ribonuclease-like protein 2](#)

Matched peptides No.: [3] Sequence coverage %: [24]

Matched sequences: [K.VFEDNVLIR.E](#);

[R.DVDEINGCDIGVR.A](#);

[R.ISDGEWLYADTDGILISR.T](#)

Calculated Mr: **17984**

Calculated pI: **5.39**

### Probability Based Mowse Score:

Ions score is  $-10 \cdot \log(P)$ , where P is the probability that the observed match is a random event. Individual ions scores  $> 45$  indicate identity or extensive homology ( $p < 0.05$ ). Protein scores are derived from ions scores as a non-probabilistic basis for ranking protein hits.

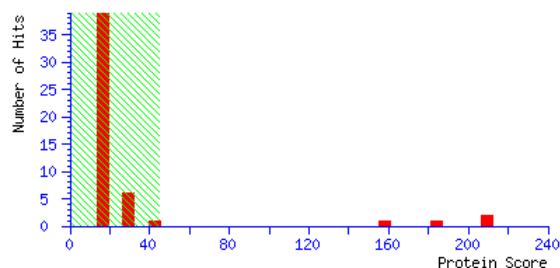

Matched peptide sequences: shown in **Bold Red**

```
1 MALVTTAEVC DANPQLIVSG ELRALQPVEQ IYGRRPVFSG PIVTLKVFED
51 NVLIREFLEE KGNGRVLVVD GGGSMRCAIL GGNPVVQAQN NGWAGIVVNG
101 CIRDVDEING CDIGVRALNS HPMKANKKGI GEKHVPIAIA GTRISDGEWL
151 YADTDGILIS RTELSV
```

Spot No.: **169**

NCBI accession No.: **gi|2832430** Species: *Hevea brasiliensis*

**PFF** score: **[152]**

Protein name: **prohevein**

Matched peptides No.: **[2]**

Sequence coverage %: **[20]**

Matched sequences: **R.IVDQCSNGGLDLVNVFR.Q;**

**K.YGWTAFCGPVGAHGQPSCGK.C**

Calculated Mr: **20852**

Calculated pI: **5.64**

### Probability Based Mowse Score:

Ions score is  $-10 \cdot \log(P)$ , where P is the probability that the observed match is a random event. Individual ions scores  $> 45$  indicate identity or extensive homology ( $p < 0.05$ ). Protein scores are derived from ions scores as a non-probabilistic basis for ranking protein hits.

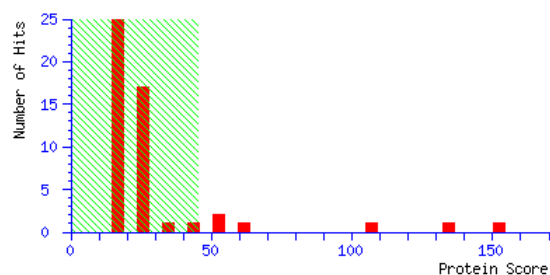

Matched peptide sequences: shown in **Bold Red**:

```
1  EQCGRQAGGK LCPNNLCCSQ  WGWCGSTDEY  CSPDHNCQSN  CKDSGEGVGG
51  GSASNVLATY  HLYNSQDHGW  DLNAASAYCS  TWDANKPYSW  RSKYGWTAFC
101 GPVGAHGQPS CGKCLSVTINT  GTGAKATVRI  VDQCSNGGLD  LDVNVFRQLD
151  TDGKGYERGH  LTVNYQFVDC  GDSFNPLFSV  MKSSVIN
```

Spot No.: **170**

NCBI accession No.: **gi|298362843** Species: *Hevea brasiliensis*

**PFF** score: **[110]**

Protein name: **actin-depolymerizing factor**

Matched peptides No.: **[1]** Sequence coverage %: **[15]**

Matched sequences: **K.LGEPTQSYEDFTASLPADECR.Y**

Calculated Mr: **16220**

Calculated pI: **5.92**

Probability Based Mowse Score:

Ions score is  $-10 \cdot \log(P)$ , where P is the probability that the observed match is a random event. Individual ions scores  $> 44$  indicate identity or extensive homology ( $p < 0.05$ ). Protein scores are derived from ions scores as a non-probabilistic basis for ranking protein hits.

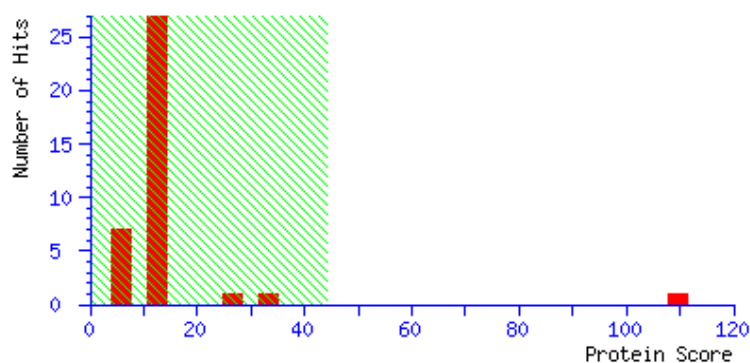

Matched peptide sequences: shown in **Bold Red**:

1 MANAASGMV HDDCKLRFLE LKAKRTYRI VFKIEEKAKQ VIVEK**LGEPT**  
51 **QSYEDFTASL PADECR**YAVY DFDFVTEENC QKSRIFFIAW SPDTSRVRSK  
101 MIYASSKDRF KRELDGIQVE LQATDPTMG LDVFKSRAS

Spot No.: 171

NCBI accession No.: [gi|115392253](#)

Species: *Cercocarpus betuloides*

PFF score: [104] Protein name: actin depolymerizing factor

Matched peptides No.: [1] Sequence coverage %: [4]

Matched sequences: [K.EKEQEEEEILVIEGIEFDR.D](#)

Calculated Mr: 58369

Calculated pI: 9.23

Probability Based Mowse Score:

Ions score is  $-10 \cdot \log(P)$ , where P is the probability that the observed match is a random event.

Individual ions scores > 40 indicate peptides with significant homology.

Individual ions scores > 44 indicate identity or extensive homology ( $p < 0.05$ ).

Protein scores are derived from ions scores as a non-probabilistic basis for ranking protein hits.

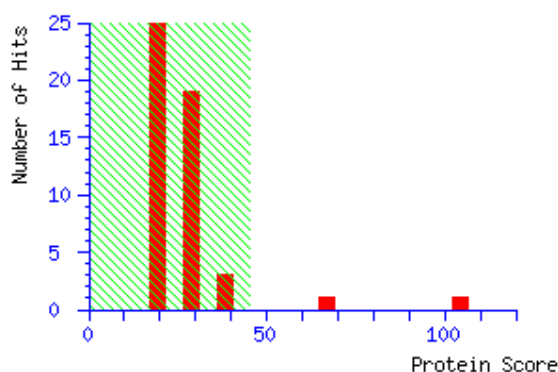

Matched peptide sequences: shown in **Bold Red**:

```
1 PFAFAKPVAP PDVSKCGAAD LPTGAQPTNC CPPVASKIID FKLPSPTPLR VRPAHAHVDK
61 AYIEKYSKAI ELMKALPDDD PRSFKQQANV HCAYCDGAYD QAGFPDLELQ IHNSWLFFPF
121 HRYLYLPHEK ILGSLIGDPT FALPFWNWDA PAGMPLPAIY ANPKSPLYDK FRAANHQPPT
181 LVDLDFNGTE DAASNETQIN ANLKIMYRQM VSNARTPQLF FGNPYRAGDE PDPGGGSIEG
241 TPHGFVHLWT GDNTQPNFED MGNFYASAGR DRIFFAHSNV DRLWSIWKTL GGRKTDITDT
301 DWLD SGFLFY DENAQMVRVK VRDCLESKNL GYVYQDANIP WLESKPTPRR VKAALGKIAK
361 KLHVAHAADN SSASKVVARA AFPIAKLDTK MSTVVARPKQ KKRSKKEKEQ EEEILVIEGI
421 EFDRDVAVKF DVYVNDEDDL PSGPDKSEFA GSFVS
```

Spot No.: 172

NCBI accession No.: [gi|2832430](#)

Species: *Hevea brasiliensis*

PFF score: [252]

Protein name: [prohevein](#)

Matched peptides No.: [3] Sequence coverage %: [26]

Matched sequences: [R.QLDTDGKGYER.G](#);

[R.IVDQCSNGGLDLVDNVFR.Q](#);

[K.YGWTAFCGPVGAHGQPSCGK.C](#)

Calculated Mr: **20852**

Calculated pI: **5.64**

### Probability Based Mowse Score:

Ions score is  $-10 \cdot \log(P)$ , where P is the probability that the observed match is a random event. Individual ions scores  $> 45$  indicate identity or extensive homology ( $p < 0.05$ ). Protein scores are derived from ions scores as a non-probabilistic basis for ranking protein hits.

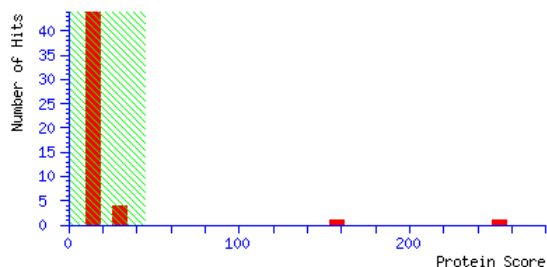

Matched peptide sequences: shown in **Bold Red**

```
1  EQCGRQAGGK LCPNNLCCSQ WGWCGSTDEY CSPDHNCQSN CKDSGEGVGG
51  GSASNVLATY HLYNSQDHGW DLNAASAYCS TWDANKPYSW RSKYGWTAFC
101 GPVGAHGQPS CGKCLSVTNT GTGAKATVRI VDQCSNGGLD LDVNVFRQLD
151 TDGKGYERGH LTVNYQFVDC GDSFNPLFSV MKSSVIN
```

Spot No.: **173**

NCBI accession No.: **gi|255574159** Species: *Ricinus communis*

Protein name: **proteasome subunit beta type 6,9, putative**

**PMF** Mascot score: **101**

Sequence coverage %: **51**

Matched peptides No.: **14**

Total peptides No.: **60**

Calculated Mr: **24912**

Calculated pI: **5.17**

Probability Based Mowse Score:

Protein score is  $-10 \cdot \log(P)$ , where P is the probability that the observed match is a random event. Protein scores greater than 73 are significant ( $p < 0.05$ ).

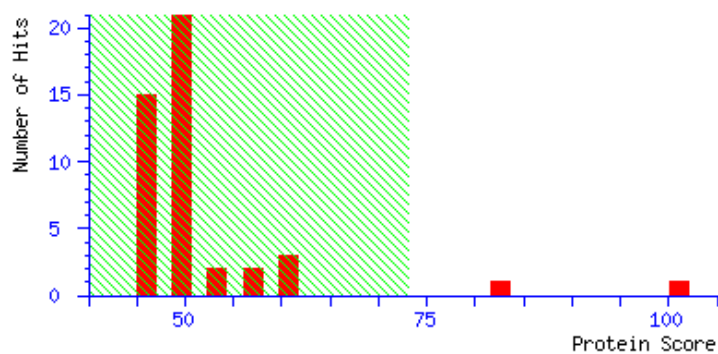

Matched peptide sequences: shown in **Bold Red**:

```
1 MDLKAPHSMG TTIIGVTYNG GVVLGADSRT STGMYVANRA SDKITQLTDN
51 VYVCRSGSAA DSQIVSDYVR YFLHQHTIQL GQPATVKVAA NLVRLISYNN
101 KNMLETGLIV GGWDKYDGGK IYGIPLGGTI IEQPFAIGGS GSSYLYGFFD
151 QAWKEGMTKD EAEQLVVKAV SLAMARDGAS GGVVRTVIIN SEGVTRNFYP
201 GDSLPLWHEE LEPQNSLLDI LNASSPEPMN I
```

Spot No.: 174

NCBI accession No.: gi|242059605 Species: *Sorghum bicolor*

PFF score: [117]

Protein name: hypothetical protein SORBIDRAFT\_03g043200

Matched peptides No.: [2] Sequence coverage %: [6]

Matched sequences: K.RFFPSEFGNDVDHVHAVEPAK.S;

R.FFPSEFGNDVDHVHAVEPAK.S

Calculated Mr: 34294

Calculated pI: 5.93

Probability Based Mowse Score:

Ions score is  $-10 \cdot \log(P)$ , where P is the probability that the observed match is a random event.

Individual ions scores  $> 45$  indicate identity or extensive homology ( $p < 0.05$ ).

Protein scores are derived from ions scores as a non-probabilistic basis for ranking protein hits.

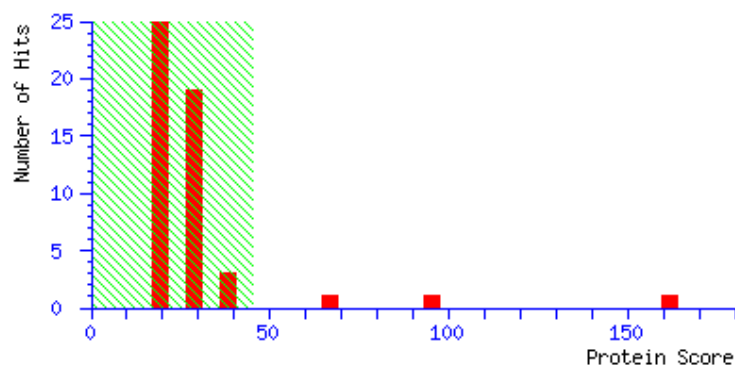

Matched peptide sequences: shown in **Bold Red**:

```
1  MSSAAGHKER  SRVLVIGGTG  YIGRFIVAAS  AREGHPTYVL  VRDPAPADPA
51  KAAVLQGFRD  AGVTLVKGDL  YNHESLVVAM  ESADVVISAV  GYAQLPDQTR
101 IISAIKDAGN  IKRFFPSEFG  NDVDHVHAVE  PAKSVFAAKA  SIRRAVEAEG
151 IPYTYISSNF  FAGRFLPAIG  QIGVTGLPID  KVLILGDGNV  KAIFGTEEDV
201 GTYTIKAVDD  PRTLNKILYL  RPPSNILSHN  ELISLWEKKV  GKTFERVYIP
251 EDDVLKKIQE  SPIPLNRALS  ISHSAWVKGD  HTNFEIDPFF  GVEATDLYPD
301 VKYTTVDEYL  NKFL
```

Spot No.: 175

NCBI accession No.: [gi|2832654](#) Species: *Arabidopsis thaliana*

Protein name: chloroplast protein cs/ch-42

PMF Mascot score: 86

Sequence coverage %: 37

Matched peptides No.: 16

Total peptides No.: 78

Calculated Mr: 66408

Calculated pI: 6.44

Probability Based Mowse Score:

Protein score is  $-10 \cdot \log(P)$ , where P is the probability that the observed match is a random event. Protein scores greater than 73 are significant ( $p < 0.05$ ).

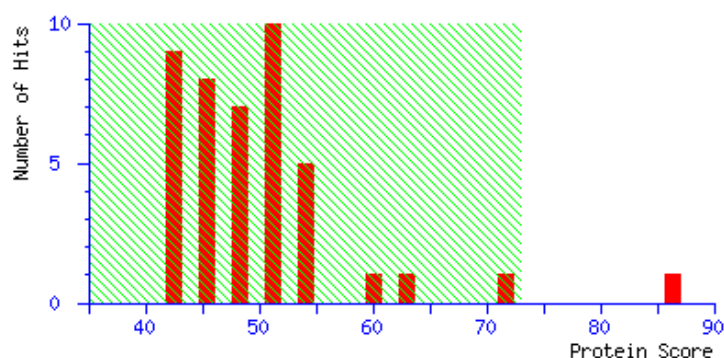

Matched peptide sequences: shown in **Bold Red**:

```
1  MLCFSASRLD  DFDLGSSPPK  KGSKTTTKSM  DCEEICASSK  SDKSDDLDFG
51  LDLPITRQVP  SKANTDVQAK  ASAEKESQNY  KTTDTLVVNK  SKNSNQAALE
101 SMGDFEAVES  PQGSRKKASQ  THTMCVQPQS  VDTSSPLKTSK  SKVEEKNEPC
151 PSNETIAPSP  LHASEIAHIA  VNRETSPDIH  ELCRSGTKED  CPIDPENANK
201 KMITTMESSY  EKIEQTSPSI  SSHLCSDKIE  HQQEEMGTDI  QAEIQDNTKG
251 ALYNSDAGHS  LTTLSGKISP  GTRTSQTAKV  QDLSEKLPLD  PSHSMAGLDN
301 LRAMQNKDLG  LIRSRFFKKP  EKPEHSVLES  SPIETEIQPV  IRENIGSSLN
351 PTNDTSSHEK  IIHKDHSNGK  TVENVAGQMD  HLKLQAKNTT  REKSILQINI
401 SSKLDASSLT  QKLSNHLSSG  VESLQKPKLN  SLGRPCLGNI  MADLRAVKTQ
451 RNVEELTHRA  VQGKVRFTNR  SVILIVTRRK  SFLCQESRID  TKTTKEPVKE
501 SPQTKSHYQN  INMANLEIPI  TENADNIEKA  EAYTKELENV  NRALFSIMNI
551 LNIICNILKK  KHEEAKELLV  RAVVDNNKLL  MLNHPLYEDQ  ISFL
```



Spot No.: 176

NCBI accession No.: gi|27449248 Species: *Hevea brasiliensis*

PFF score: [487] Protein name: ascorbate peroxidase

Matched peptides No.: [5] Sequence coverage %: [34]

Matched sequences: R.EDKPEPPPEGR.L;

R.IAWHSAGTYDANTK.T;

R.HAAEQAHAAANGLDIAVRL;

K.YAADEDAFFADYAEAHVK.L;

K.EGLLQLPTDTVLVTDVPVFRPYVEK.Y

Calculated Mr: 27526

Calculated pI: 5.78

### Probability Based Mowse Score:

Ions score is  $-10 \cdot \log(P)$ , where P is the probability that the observed match is a random event. Individual ions scores  $> 45$  indicate identity or extensive homology ( $p < 0.05$ ). Protein scores are derived from ions scores as a non-probabilistic basis for ranking protein hits.

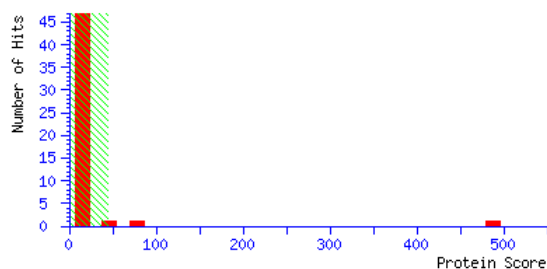

Matched peptide sequences: shown in **Red**:

```
1  MTKNYPKVSE EYQKAIDKAK RKLRFIAEK GCAPLMRIA WHSAGTYDAN
51 TKTGGPFGTM RHAAEQAHAA NNGLDIAVRL LEPIKQQFPI LSYADFYQLA
101 GVVAVEITGG PEIPFHPGRE DKPEPPPEGR LPNATKGADH LREVFGKTMG
151 LSDKDIVVLS GGHTLGRCHK ERSGFDGPWT ANPLIFDNSF FTELLAGQKE
201 GLLQLPTDTV LVTDPVFRPY VEKYAADEDA FFADYAEAHV KLSELGFAEA
```

Spot No.: 177

NCBI accession No.: [gi|357480975](#) Species: *Medicago truncatula*

PFF score: [369]

Protein name: Proteasome subunit beta type

Matched peptides No.: [7] Sequence coverage %: [42]

Matched sequences: [K.NVALYQFR.N](#);

[R.VQFTEYIQK.N](#);

[R.LVVAPPNFVIK.I](#);

[R.NGIPLTTAAAANFTR.G](#);

[K.GAFGYGSYFSLSMMDR.H](#);

[K.ETGPSLYYIDYIATLHK.L](#);

[K.LIAASGEPGDRVQFTEYIQK.N](#)

Calculated Mr: 22572

Calculated pI: 6.06

Probability Based Mowse Score:

Ions score is  $-10 \cdot \log(P)$ , where P is the probability that the observed match is a random event. Individual ions scores  $> 45$  indicate identity or extensive homology ( $p < 0.05$ ). Protein scores are derived from ions scores as a non-probabilistic basis for ranking protein hits.

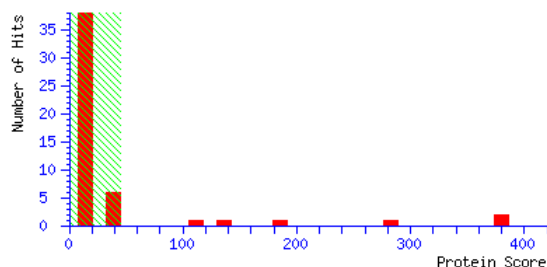

Matched peptide sequences: shown in **Bold Red**:

```
1  MECVFGLVGN  GFAIVVADTS  AVHSILVHKS  NEDKIMFLDS  HKLIAASGEP
51  GDRVQFTEYI  QKNVALYQFR  NGIPLTTAAA  ANFTRGELAT  ALRKNPYSVN
101 ILLAGYDKET  GPSLYYIDYI  ATLHKLEKGA  FGYGSYFSL  MMDRHFHSGM
151 NVEEAIDLVD  KCILEIRSRL  VVAPPNFVIK  IVDKDGAREY  AWRESVKDTP
201 ASA
```

Spot No.: **178**

NCBI accession No.: **gi|255541320** Species: *Ricinus communis*

**PFF** score: **[302]**

Protein name: **proteasome subunit beta type, putative**

Matched peptides No.: **[4]** Sequence coverage %: **[28]**

Matched sequences: **K.HLIYQHQNK.Q;**

**K.GCVYTYDAVGSYER.V;**

**R.FFPYYAFNVLGGLDSEGK.G;**

**R.VGYSAQGSGSTLIMPFLDNQLK.S**

Calculated Mr: **24880**

Calculated pI: **6.08**

Probability Based Mowse Score:

Ions score is  $-10 \cdot \log(P)$ , where P is the probability that the observed match is a random event. Individual ions scores  $> 45$  indicate identity or extensive homology ( $p < 0.05$ ). Protein scores are derived from ions scores as a non-probabilistic basis for ranking protein hits.

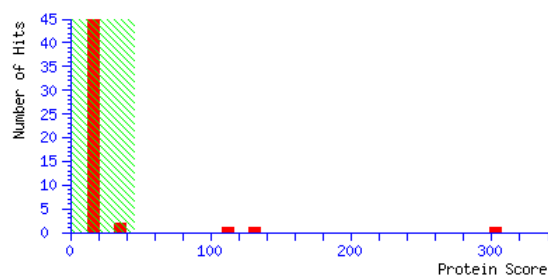

Matched peptide sequences: shown in **Bold Red**:

```
1 MTKQQANWSP YDNNGGSCVA IAGADYCVIA ADTRMSTGYN ILTRDYSKIC
51 QLAEKSVMAS SGFQADVQAL QKHLKAKHLI YQHQNKQMS CPAMGQLLSN
101 TLYFKRFFPY YAFNVLGGLD SEGKGCVYTY DAVGSYERVG YSAQGSGSTL
151 IMPFLDNQLK SPSPLLLPAQ DAVTPLSEPE AVDLVKTVFA SATERDIYTG
201 DKVEIVVLNA DGIRREYMEL RKD
```

Spot No.: 179

NCBI accession No.: [gi|350537255](#)

Species: *Solanum lycopersicum*

Protein name: small zinc finger-like protein

PMF score: 82

Sequence coverage %: 70

Matched peptides No.: 7

Total peptides No.: 40

Calculated Mr: 9669

Calculated pI: 6.56

### Probability Based Mowse Score:

Protein score is  $-10 \cdot \log(P)$ , where P is the probability that the observed match is a random event.  
Protein scores greater than 73 are significant ( $p < 0.05$ ).

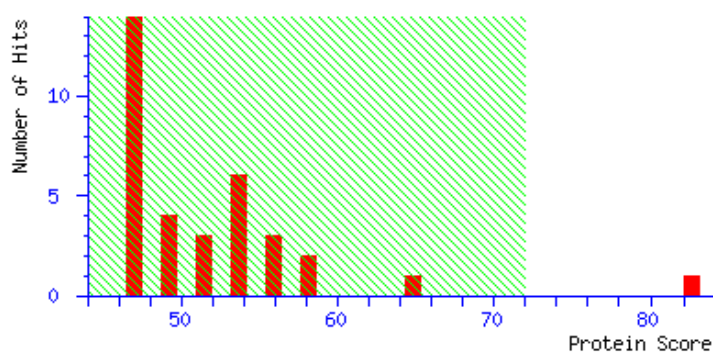

Matched peptide sequences: shown in **Bold red**:

1 **MAGVPSNLER** **EQIFSMAEKE** MEYRVEMFNK LHTTCFKKCV ENKYKDSLN  
51 **MGENSCIDRC** **VSKYWQVTNL** VGTLLGNTRP M

Spot No.: **180**

NCBI accession No.: **gi|37622210** Species: *Hevea brasiliensis*

Protein name: **small rubber particle protein**

**PMF** Mascot score: **107**

Sequence coverage %: **60**

Matched peptides No.: **10**

Total peptides No.: **38**

Calculated Mr: **18929**

Calculated pI: **8.99**

Probability Based Mowse Score:

Protein score is  $-10 \cdot \log(P)$ , where P is the probability that the observed match is a random event. Protein scores greater than 73 are significant ( $p < 0.05$ ).

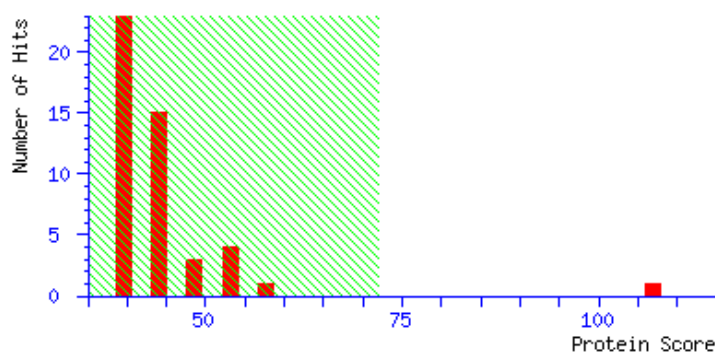

Matched peptide sequences: shown in **Bold Red**:

1 **KFHDVPNEVL** **KFVDRKVDDES** **VTSLDSRVPP** **VVKQVSAQAY** **SVAREAPVAA**  
51 **RAVASEVHQSS** **GVKETASGLA** **KTLYTKYEPK** **AKELYSKYEP** **KAEQCAVTAW**  
101 **RRLNQLPLFP** **QVAQVVVPTA** **AYCSEKYNQT** **VLSTFEKGYR** **VSSYLPLVPT**  
151 **ERIAKVFSSD** **VAQSMPLVSS**

Spot No.: 181

NCBI accession No.: gi|168038495

Species: *Physcomitrella patens subsp. patens*

Protein name: predicted protein

PMF score: 81

Sequence coverage %: 36

Matched peptides No.: 18

Total peptides No.: 81

Calculated Mr: 61349

Calculated pI: 5.80

Probability Based Mowse Score:

Protein score is  $-10 \cdot \log(P)$ , where P is the probability that the observed match is a random event. Protein scores greater than 73 are significant ( $p < 0.05$ ).

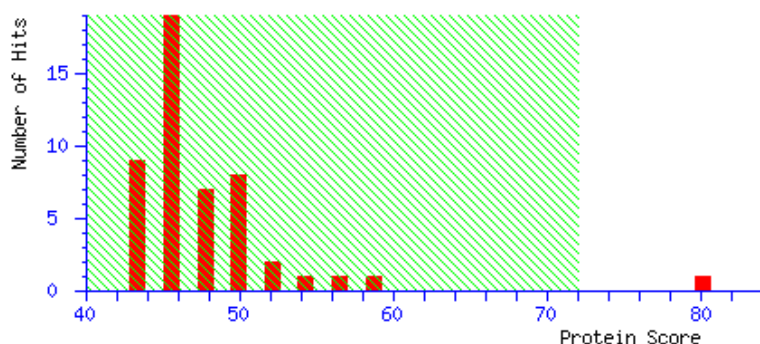

Matched peptide sequences: shown in **Bold red**:

```
1  MQAPVLVLNE  STKRETGGRV  HHANIQASKA  VADVIRTTLG  PRSMLKMLLD
51  ASGGIVLTND  GNAILRELDV  SHPAAKSMIE  LSRTQDEEVG  DGTTSVILLA
101 GEMLYVAEQF  LDRQFHP TVI  CRAYTKALED  AVAALKEIAF  DIDITDR TMM
151 LNIVRSCIGT  KFTSRFGTLI  ADLAIDSVAT  ISVDLGNGLR  EVDIKKYIKV
201 EKIPGGQLED  SKVLKGV M FN  KDVVSPGKMR  RKILNPRIIL  LDSPLEYKKG
251 ENQTNAEIMK  EEDWATLLRM  EEEYIEQLCV  QIIKFKPDLV  ITEKGLSDLA
301 SHYLSKAGIS  AIRRLRKT DN  NRIARACGAT  IVNRPEELQE  SDVGTRCGLF
351 EVK KIGDEYF  TFIVQCNEPK  ACTVLLRGPS  KDLLNEVERN  LADAMGVARN
401 VIKDAKLVPG  GGASEMAVSA  ILKKN SMSIE  GVEQWPYRAV  AQALEVIPRT
451 LAQNCGVNVI  RTMTALQAKH  ANAENPMFGI  DGNTGELTDM  KELGVWDSFG
501 VKLQTFKTAI  EAACMLLRID  DIVSGIKKKQ  APGAAPQPM  TSTGEDVDSE
551 QMIPE
```

Spot No.: **182**

NCBI accession No.: **gi|164472662** Species: *Triticum aestivum*

Protein name: **calcium-dependent protein kinase**

**PMF** Mascot score: **82**

Sequence coverage %: **28**

Matched peptides No.: **17**

Total peptides No.: **74**

Calculated Mr: **61353**

Calculated pl: **6.04**

Probability Based Mowse Score:

Protein score is  $-10 \cdot \log(P)$ , where P is the probability that the observed match is a random event. Protein scores greater than 73 are significant ( $p < 0.05$ ).

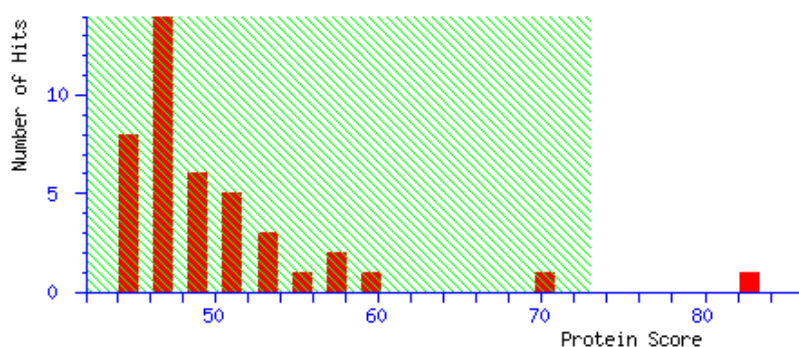

Matched peptide sequences: shown in **Bold Red**:

```
1  MGNCCRSPAA  AAREDVSSSH  FPASAGKRKP  HQARNGGGGG  AGGGGGGGGA
51 GAGGEKKRLS  VLGEEGPDVS  GGIDDKYALD  RELGRGEFGV  TYLCMDRGSK
101 ELLACKSISK  RKLRTPVDVE  DVRREVAIMR  HLPRSASIVT  LREACEDDGA
151 GHLVMELCEG  GELFDRIVAR  GHYTERAAAA  VTRTIVEVVQ  LCHHHGVIHR
201 DLKPENLFA  NKKENSPLKA  IDFGLSIFFK  PGEKFSEIVG  SPYYMAPEVL
251 KRNYGPEIDI  WSAGVILYIL  LCGVPPFWAE  TEQGVAQAIL  RGNIDFKREP
301 WPHVSDNAKD  LDRQMLQPDP  KIRLTAKQVL  EHTWLQNAKK  APNVPLGDIV
351 KSRLKQFSRM  NRFKRRALRV  IADHLSAEEV  EDIKEMFKVM  DTDNDGIVSY
401 EELKSGIAKF  GSHLAESEVQ  MLIEAVDTNG  RGALDYGEFL  AVSLHLQRMA
451 NDEHLRRAFL  FFDKDGDGFI  EPEELQEALA  EDGAVDITEV  VKDILQEVDT
501 DKDGKISFEE  FVAMMKTGTD  WRKASRHYSR  GRFNSLSIRL  IKDGSVKMGN
551 E
```

Spot No.: **183**

NCBI accession No.: **gi|32527831**

Species: *Populus tremula x Populus tremuloides*

Protein name: **UDP-glucose pyrophosphorylase**

**PMF** Mascot score: **92**

Sequence coverage %: **29**

Matched peptides No.: **12**

Total peptides No.: **45**

Calculated Mr: **51949**

Calculated pI: **5.68**

Probability Based Mowse Score:

Protein score is  $-10 \cdot \log(P)$ , where P is the probability that the observed match is a random event. Protein scores greater than 73 are significant ( $p < 0.05$ ).

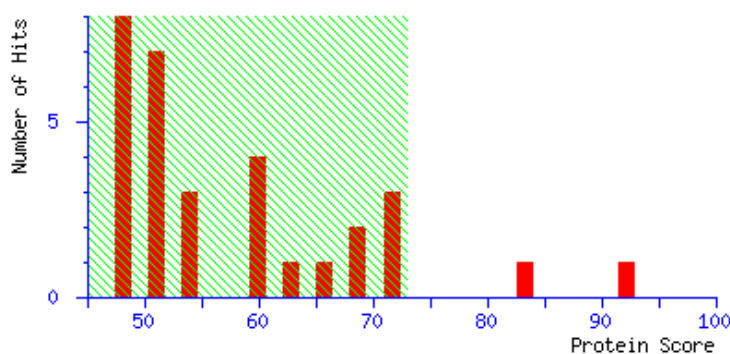

Matched peptide sequences: shown in **Bold Red**:

```
1 MATDTEKISQ LKSAVANLNQ ISESEKTGFV NLVSRYLSGE AQQVEWSKIQ
51 TPTDEVVVPY DTLESTPEDP EETKMLLDKL VVLKLNGGLG TTMGCTGPKS
101 VIEVRNGLTF LDLIVIQIES LNKKYGCSVP LLLMNSFNTH DDTQKIIEKY
151 SNSNIEIHTF NQSQYPRLVA DDFVPLPSKG HTDKDGWYPP GHGDVFPSLK
201 NSGKLDALLS QGKEYVFFVAN SDNLGAVVDL KILNHLIRNK NEYCMEVTPK
251 TLADVKGGTL ISYEGKVQLL EIAQVPDQHV NEFKSIEKFK IFNTNNLWVN
301 LKAIKRLVEA DALKMEIIPN PKEVDGVKVL QLETAAGAAI RFFDHAGIN
351 VPRSRFLPVK ASSDLLLVQS DIYTPVVDGF VIRNPGRANP ANPSIELGPE
401 FKKVASFLSR FKSIPSIIEL DSLKVAGDVW FGVNVTLKGK VSIVVKSGVK
451 LEIPEGVVLE NKEINGPKDL
```



Spot No.: **184**

NCBI accession No.: **gi|356576773** Species: *Glycine max*

Protein name: *seryl-tRNA synthetase-like*

**PMF** Mascot score: **92**

Sequence coverage %:**28**

Matched peptides No.: **17**

Total peptides No.: **53**

Calculated Mr: **51822**

Calculated pI:**6.04**

Probability Based Mowse Score:

Protein score is  $-10 \cdot \log(P)$ , where P is the probability that the observed match is a random event. Protein scores greater than 73 are significant ( $p < 0.05$ ).

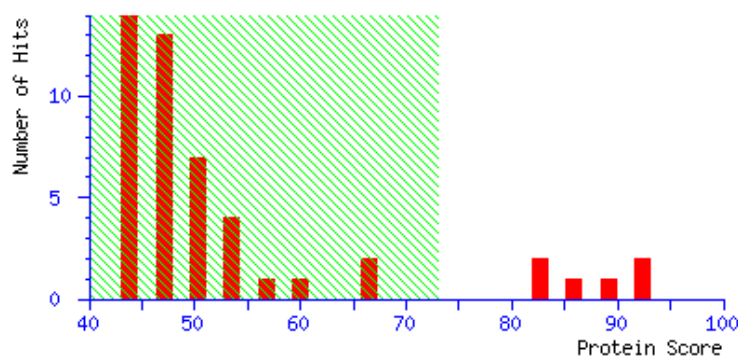

Matched peptide sequences: shown in **Bold Red**

```
1  MLDINLFREE  KGHNPEFIRE  SQRRRFASVE  VVDEVINLDK  EWRKRQFELE
51 NLRKEFNKIN  KEVSKLKRAE  EDATKFISES  EETKKSSIGEK  EVEVRETLNL
101 LNSKLETIGN  LVHDSVPISQ  DEANNVVVRS  WGEKRVEPKL  KNHVDLVELL
151 GIADTKKGAD  VAGGRGFYLK  GDGVRLNQAL  INFGLDFLEK  REYTLLHTPF
201 FMRKDIMSKC  AQLAQFDEEL  YKVTGEGDDK  YLIATAEQPL  CAYHLDDWIH
251 PTQLPLRYAG  YSSCFRKEAG  SHGRDTLGIF  RVHQFVEQ  FCLTSPNDND
301 SWDMHEEMLK  NSEDFYKALN  LPYQVVSIVS  GALNDAAAKK  YDLEAWFPAS
351 QAYRELVSCS  NCTDYQARRL  EIRYGQKSN  EQMKQYVHLL  NSTLTATERT
401 ICCILENNQK  EDGVEIPEAL  RPFMGGKTFL  PFKNQPSNEA  KGKKSKA
```

Spot No.: **185**

NCBI accession No.: [gi|357514973](#) Species: *Medicago truncatula*

PFF score: **[51]**

Protein name: **annexin, putative**

Matched peptides No.: **[2]**

Sequence coverage %: **[7]**

Matched sequences: [R.SSEELLGAR.K](#);

[R.FENALVIWAMHPWER.D + Oxidation \(M\)](#)

Calculated Mr: **35872**

Calculated pI: **6.04**

Probability Based Mowse Score:

Ions score is  $-10 \cdot \log(P)$ , where P is the probability that the observed match is a random event. Individual ions scores  $> 44$  indicate identity or extensive homology ( $p < 0.05$ ). Protein scores are derived from ions scores as a non-probabilistic basis for ranking protein hits.

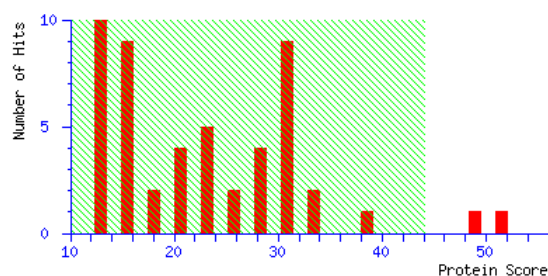

Matched peptide sequences: shown in **Bold Red**:

```
1 MAHPPELEAL TKAFSGLGVD EKSLISILGK SHPEHRKSFR KGSPHLFIED
51 ERSFERWDDD SVHLLRQEFA RFENALVIWA MHPWERDARL IYEALREGPQ
101 SYGVIVEIAC TRSSEELLGA RKAYHSLFDH SIEEDVATHI SGTERKLLVA
151 LASAYRYEGP KVKEDSAKFE AKIFANAVKN GDKTNPIEDD EVIRILSTRS
201 KPHLKAVYKH YKEISGNGII EDLGAANLIL KETVECLCTP HAFFSKVLDK
251 AMRKDADHNT KKALTRVIVT QADIDLKEIS EQYNSLYGIP LSKKVEETAN
301 GNYKDFLLAL ISREN
```

Spot No.: **186**

NCBI accession No.: **gi| 1351887** Species: *Malus x domestica*

**PFF** score: **[63]**

Protein name: **Alcohol dehydrogenase**

Matched peptides No.: **[1]** Sequence coverage %: **[7]**

Matched sequences: **K.SMGMPDEDEAAVELAWSR.F**

Calculated Mr: **42066**

Calculated *pI*: **6.48**

Probability Based Mowse Score:

Ions score is  $-10 \cdot \log(P)$ , where P is the probability that the observed match is a random event. Individual ions scores > 45 indicate identity or extensive homology ( $p < 0.05$ ). Protein scores are derived from ions scores as a non-probabilistic basis for ranking protein hits.

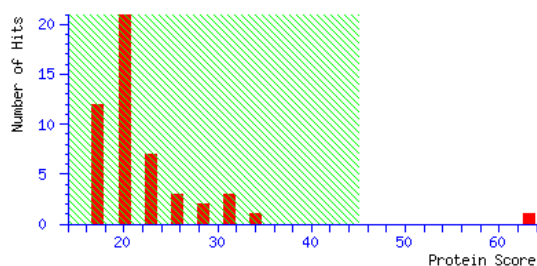

Matched peptide sequences: shown in **Bold Red**:

```
1  MLAAAIRSLS  PSSTSSIFNK  SALPPLLRSL  SPSLNSRFQ  IRSMADSASS
51  PFKKVQIHRD  NTTFDAYVIG  KDDAPGIVVV  QEWVGVD FEI  KNHAEKISQL
101 EPGFKALIPD  LYRGKVGLDV  AEAQHLM DGL  DWQGAVKDIG  ASVNWLKANG
151 SKKAGVTGFC  MGGALAIASS  VLVPEVDAVV  AFYGVPPSEL  ADATQAKAPI
201 QAHFGELDNF  VGFADITAAK  ALEEKLKASG  VPSEVHIYPG  NAHAFMNRSA
251 EGVKRRKSMG MPDEDEAAVE LAWSRFRSWM  NQYLSA
```

Spot No.: **187**

NCBI accession No.: **gi|380468126** Species: *Hevea brasiliensis*

**PFF** score: **[123]**

Protein name: **caffeic acid 3-O-methyltransferase**

Matched peptides No.: **[3]** Sequence coverage %: **[11]**

Matched sequences: **K.NPEAPVLLDR.M;**

**K.SWYHLNEAILEGGTPFNR.A;**

**R.AYGMNQFEYPGTDQR.F + Oxidation (M)**

Calculated Mr: **40957**

Calculated pI: **5.54**

Probability Based Mowse Score:

Ions score is  $-10 \cdot \log(P)$ , where P is the probability that the observed match is a random event.

Individual ions scores  $> 45$  indicate identity or extensive homology ( $p < 0.05$ ).

Protein scores are derived from ions scores as a non-probabilistic basis for ranking protein hits.

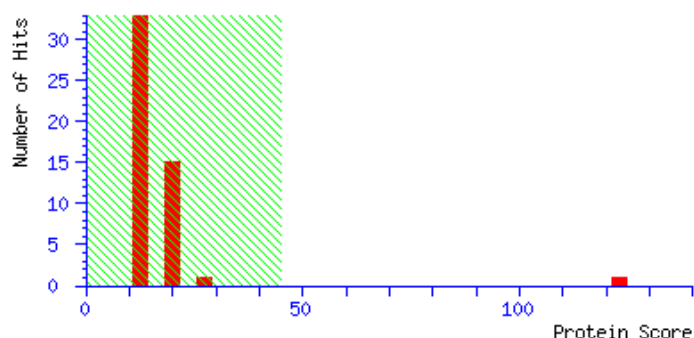

Matched peptide sequences: shown in **Bold Red**:

```
1  MTGSEQNSA  SIMSGRSDEE  TWNLAIDLAN  TVILPMVLKS  ALELNVIDII
51  STAGNSGASL  SAPEIAQRIP  EAKNPEAPVL  LDRMLRLLAT  YDIVKCSSNT
101 KENGEVERLY  APGPICKFLT  KNKNGSGSAA  PLLLLHHDEV  FMKSWYHLNE
151 AILEGGTPFN  RAYGMNQFEY  PGTDQRFNRV  FNDAMSSYTT  YLVKKILDAY
201 KGF DGLKSLV  DVG GNSGVTL  NSITSKYPHI  KGINYDLPHV  LADAPSYPGV
251 EHVAGDMFKS  VPKGDAILLK  WVLHDWDDDL  CLKLLKNCWE  ALPSNGKVIV
301 VESILPTVPE  NNVTSQVLHK  EDLMLLSFNV  G GKERTRQEF  EALASKSGFS
351 SCEFICCAYN  SWVIEFHK
```

Spot No.: **188**

NCBI accession No.: **gi|380468126** Species: *Hevea brasiliensis*

**PFF** score: **[117]**

Protein name: **caffeic acid 3-O-methyltransferase**

Matched peptides No.: **[2]**

Sequence coverage %: **[8]**

Matched sequences: **K.SWYHLNEAILEGGTPFNR.A;**

**R.AYGMNQFEYPGTDQR.F + Oxidation (M)**

Calculated Mr: **40957**

Calculated pl: **5.54**

Probability Based Mowse Score:

Ions score is  $-10 \cdot \log(P)$ , where P is the probability that the observed match is a random event.

Individual ions scores  $> 44$  indicate identity or extensive homology ( $p < 0.05$ ).

Protein scores are derived from ions scores as a non-probabilistic basis for ranking protein hits.

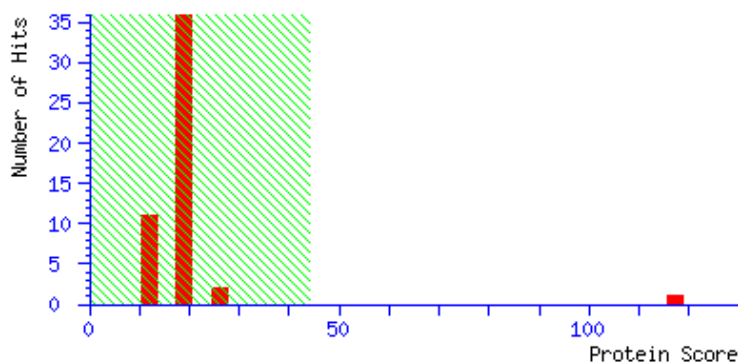

Matched peptide sequences: shown in **Bold Red**:

```
1  MTGSEQSNSA  SIMSGRSDEE  TWNLAIIDLAN  TVILPMVLKS  ALELNVIDII
51  STAGNSGASL  SAPEIAQRIP  EAKNPEAPVL  LDRMLRLLAT  YDIVKCSSNT
101 KENGEVERLY  APGPICKFLT  KNKNGSGSAA  PLLLLHHDEV  FMKSWYHLNE
151 AILEGGTPFN  RAYGMNQFEY  PGTDQRFNRV  FNDAMSSYTT  YLVKKILDAY
201  KGF DGLKSLV  DVG GNSGVTL  NSITSKYPHI  KGINYDLPHV  LADAPSYPGV
251  EHVAGDMFKS  VPKGDAILK  WVLHDWNDL  CLKLLKNCWE  ALPSNGKVIV
301  VESILPTVPE  NNVTSQVLHK  EDLMLLSFNV  G GKERTRQEF  EALASKSGFS
351  SCEFICCAYN  SWVIEFHK
```

Spot No.: **189**

NCBI accession No.: **gi|284433794** Species: *Jatropha curcas*

**PFF** score: **[159]**

Protein name: **glutathione S-transferase omega**

Matched peptides No.: **[3]**

Sequence coverage %: **[10]**

Matched sequences: **K.IIGESLDLIK.Y;**

**K.YDITAGRPK.L;**

**K.ELVEFYK.K**

Calculated Mr: **27480**

Calculated pI: **5.41**

Probability Based Mowse Score:

Ions score is  $-10 \cdot \log(P)$ , where P is the probability that the observed match is a random event.

Individual ions scores  $> 45$  indicate identity or extensive homology ( $p < 0.05$ ).

Protein scores are derived from ions scores as a non-probabilistic basis for ranking protein hits.

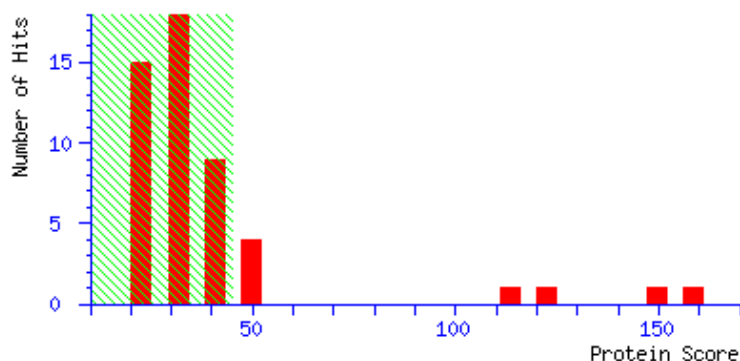

Matched peptide sequences: shown in **Bold Red**:

```
1  MAATALDKSL  PEKLPPIIDA  TAEQPPLFDG  TIRLYTSYAC  PFAQRVWITR
51  NYKGLQDKIK  LVPLNLQNRP  SWYGEKVYPA  NKVPALEHNG  KIIGESLDLI
101 KYIDANFEGP  SLLPDDPAKK  EFAEELFSYT  DTFTKTVFTS  FKGDVAKDAS
151  PAFDYLENAL  HKFEDGPFL  GQFSLVDIAY  IPFVERFQIF  FSEVFKYDIT
201 AGRPKLAAWI  EEMNKIEAYK  QTKTDPKELV  EFYKKRLLAQ
```

Spot No.: **190**

NCBI accession No.: **gi|255567721** Species: *Ricinus communis*

**PFF** score: **[52]**

Protein name: **carboxymethylenebutenolidase, putative**

Matched peptides No.: **[1]** Sequence coverage %: **[6]**

Matched sequences: **K.SMGMPDEDEAAVELAWSR.F + 2 Oxidation (M)**

Calculated Mr: **30833**

Calculated pI: **6.09**

### Probability Based Mowse Score:

Ions score is  $-10 \cdot \log(P)$ , where P is the probability that the observed match is a random event. Individual ions scores  $> 45$  indicate identity or extensive homology ( $p < 0.05$ ). Protein scores are derived from ions scores as a non-probabilistic basis for ranking protein hits.

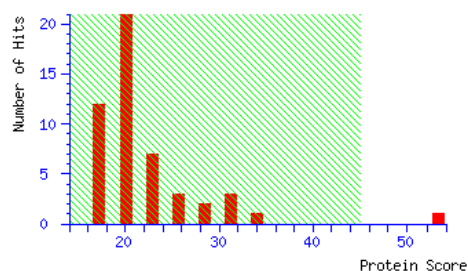

Matched peptide sequences: shown in **Bold Red**:

```
1  MLAAAIRSLS  PSSTSSIFNK  SALPPLLRSL  SPSLNSRFQ  IRSMADSASS
51  PFKKVQIHRD  NTTFDAYVIG  KDDAPGIVVV  QEWWGVDFEI  KNHAEKISQL
101 EPGFKALIPD  LYRGKVGLDV  AEAQHLM DGL  DWQGAVKDIG  ASVNWLKANG
151 SKKAGVTGFC  MGGALAIASS  VLVPEVDAVV  AFYGVPPSEL  ADATQAKAPI
201 QAHFGELDNF  VGFADITAAK  ALEEKLKASG  VPSEVHIYPG  NAHAFMNRSA
251 EGVKRRKSMG MPDEDEAAVE LAWSRFRSWM NQYLSA
```

Spot No.: **191**

NCBI accession No.: **gi|125573095**

Species: *Oryza sativa Japonica Group*

**PFF** score: **[59]** Protein name: **hypothetical protein OsJ\_04535**

Matched peptides No.: **[1]** Sequence coverage %: **[8]**

Matched sequences: **M.SSWNSPYDYDTSSYGAGSGGGGGGGR.R**

Calculated Mr: **29680**

Calculated pI: **10.36**

### Probability Based Mowse Score:

Ions score is  $-10 \cdot \log(P)$ , where P is the probability that the observed match is a random event. Individual ions scores  $> 45$  indicate identity or extensive homology ( $p < 0.05$ ). Protein scores are derived from ions scores as a non-probabilistic basis for ranking protein hits.

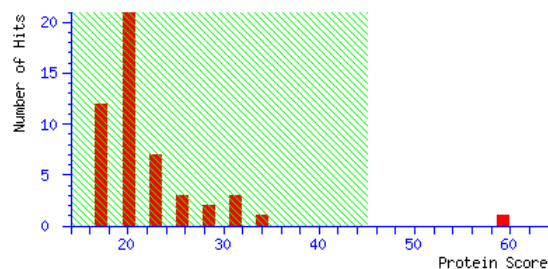

Matched peptide sequences: shown in **Bold Red**:

```
1  MSSWNSPYDY TSSYGAGSGG GGGGGRRSSS PPRGAGDKKE TKTKDYQSYT
51 SNNNNNGSDD DKDKNKHKIT SSKHKKDEK DRNNHSDSH GGGNSSNYNK
101 DSYGGNSGNP NNYGSSSTGV VAGSGSYYGG GGGYGGNTS YGGSLSYGKD
151 GGYGGNSNPY GGGSSIIISG AAPIPHNFG FYLNRLAGSA AAAGRVRVGG
201 AGVHPRGGGE GHLPPHAARP RLIVVVVLAV AEVRERGRQE EERRRWIRIR
251 KQQRRRRRRV LRPSVPRRRR LHRPVCVN
```



Spot No.: **192**

NCBI accession No.: **gi|255542380** Species: *Ricinus communis*

Protein name: *cysteine synthase, putative*

**PMF** Mascot score: **82**

Sequence coverage %: **37**

Matched peptides No.: **13**

Total peptides No.: **59**

Calculated Mr: **34435**

Calculated pI: **5.50**

Probability Based Mowse Score:

Protein score is  $-10 \cdot \log(P)$ , where P is the probability that the observed match is a random event. Protein scores greater than 73 are significant ( $p < 0.05$ ).

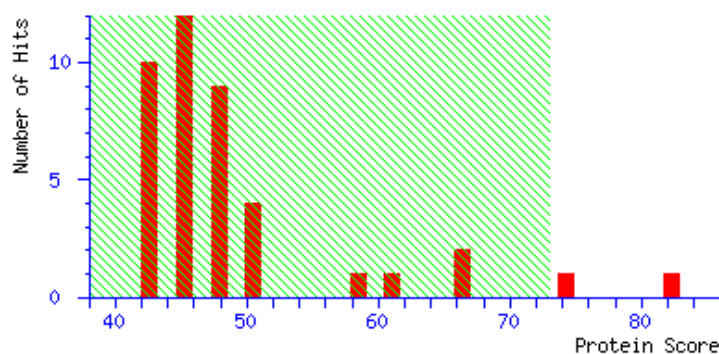

Matched peptide sequences: shown in **Bold Red**:

```
1  MVEEKSAIAK  DVTELVGKTP  LVYLNHVVDG  CVARIAAKLE  MMEPCSSVKD
51  RIGYSMITDA  EEKGLIKPGE  SVLIEPTSGN  TGIGLAFMAA  AKGYKLIITM
101 PASMSLERRM  VLRAFGAELV  LTDPARGMKG  AVQKAEIILA  KTPNSYILQQ
151  FENPANPKIH  YETTGPEIWK  GSGGKVDFV  SGIGTGGTVT  GAGGYLREQN
201  PDIKLIGVEP  VESAVLSGGK  PGPHKIQGIG  AGFIPGVLDV  SLLDEVVQIS
251  SEEAIETAKL  LALKEGLLVG  ISSGAAAAAA  IKIARRPENA  GKLIVVIFPS
301  FGERYLSSVL  FESVKREAES  MVFEP
```

Spot No.: **193**

NCBI accession No.: **gi|255562276** Species: *Ricinus communis*

**PFF** score: **[57]**

Protein name: **pyridoxine kinase, putative**

Matched peptides No.: **[1]** Sequence coverage %: **[4]**

Matched sequences: **K.LYVPELVAVYR.E**

Calculated Mr: **32436**

Calculated pI: **5.56**

Probability Based Mowse Score:

Ions score is  $-10 \cdot \log(P)$ , where P is the probability that the observed match is a random event.

Individual ions scores  $> 35$  indicate peptides with significant homology.

Individual ions scores  $> 45$  indicate identity or extensive homology ( $p < 0.05$ ).

Protein scores are derived from ions scores as a non-probabilistic basis for ranking protein hits.

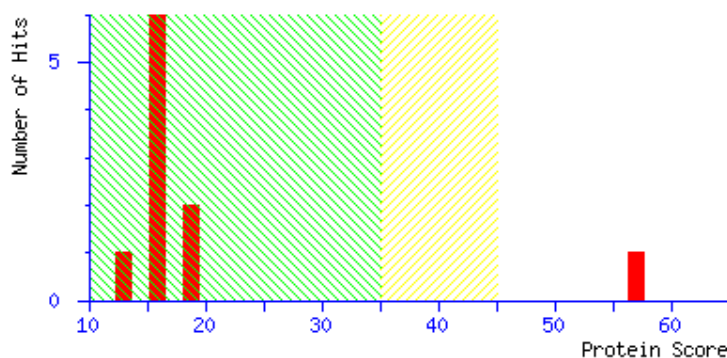

Matched peptide sequences: shown in **Bold Red**:

```
1  MAPPILSLAL  PSGTGRVLSI  QSHTVQGYVG  NKSAVFPLQI  LGYDVDPINS
51  VQFSNHTGYP  SVKGQVLNGQ  QLWDLIEGLE  GNDLLYYTHL  LTGYIGSVSF
101 LNTILEVVNK  LRSINPKLTY  VCDPVMGDEG  KLYVPELVA  VYREKVVPVA
151 SMLTPNQFEA  EQLTGFRIVT  EKDGREACNT  LHAAGPSKVI  ITSINIDGNL
201 LLVGSHQKEK  DQPPEQFKIE  IPKIPAYFTK  YPDNLGTAAE  LAVSSLQALL
251 QRTVNDYRSV  GYDPQSSSLE  IRLIQSQDDI  RHPQVKFKAE  KYD
```

Spot No.: **194**

NCBI accession No.: **gi|255552291** Species: *Ricinus communis*

**PFF** score: **[303]**

Protein name: **short chain dehydrogenase, putative**

Matched peptides No.: **[3]** Sequence coverage %: **[11]**

Matched sequences: **K.VALVTGGDSGIGR.A;**

**K.DPIAIPTDVGFEENCR.K;**

**K.AEGAKDPIAIPTDVGFEENCR.K**

Calculated Mr: **32148**

Calculated *pI*: **6.50**

Probability Based Mowse Score:

Ions score is  $-10 \cdot \log(P)$ , where P is the probability that the observed match is a random event. Individual ions scores  $> 45$  indicate identity or extensive homology ( $p < 0.05$ ). Protein scores are derived from ions scores as a non-probabilistic basis for ranking protein hits.

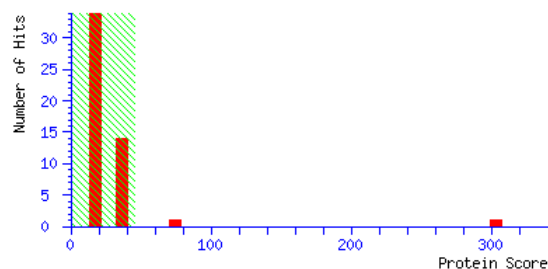

Matched peptide sequences: shown in **Bold Red**:

```
1  MATRRGYRFP  PQSQDKQPGK  EYLMHPLPEF  INPHYKPSNK  LQDKVALVTG
51  GDSGIGRAVS  YYFTLEGATV  AFTYVKGRED  KDKDHILKIL  HEVKAEGAKD
101 PIAIPTDVGF  EENCRKVIDQ  IMSEYGKIDI  LVNNAGEAHY  STTIEDITDP
151 MLERVFRTNI  FGHHFMSRHA  LKHMKEGGCI  INTASVAAYA  GFSFMVDYSS
201 TKGAVVAFTR  SLALQLIDRG  IRVNAVAPGS  VWTFFQPSTL  SAEQVAQVGS
251 GVPMDRAAQP  YEIAPSEVFL  ASNDCSSYFT  GQVLHPNGMF
```

Spot No.: **195**

NCBI accession No.: [gi|255543357](#) Species: *Ricinus communis*

Protein name: [heat shock protein, putative](#)

**PMF** Mascot score: **102**

Sequence coverage %: **27**

Matched peptides No.: **18**

Total peptides No.: **61**

Calculated Mr: **71.965**

Calculated pI: **5.27**

Probability Based Mowse Score:

Protein score is  $-10 \cdot \log(P)$ , where P is the probability that the observed match is a random event. Protein scores greater than 73 are significant ( $p < 0.05$ ).

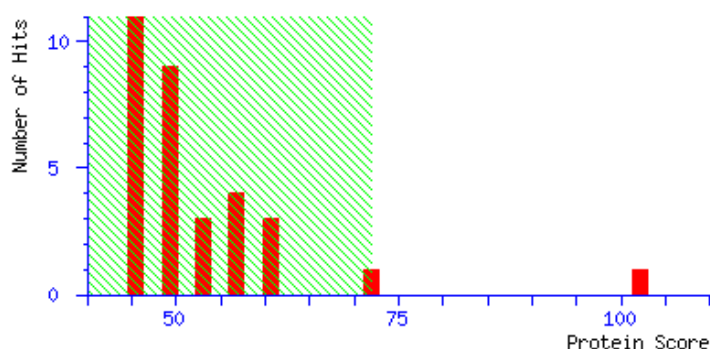

Matched peptide sequences: shown in **Bold Red**:

```
1  MAKTEGKAVG  IDLGTTYSCV  GVWQNDRVEI  IANDQGNRTT  PSYVAFTDTE
51 RLIGDAAKNQ  VAMNPQNTVF  DAKRLIGRRF  SDPSVQSDMK  HWPFKVVPGP
101 GDKPMIVVLY KGEKQFAPE  EISSMVLIKM  KEIAEAYLGQ  TVKNAVITVP
151 AYFNDSQRQA TKDAGAISGL NVMRIINEPT AAAIAYGLDK  KGSRSGEKNV
201 LIFDLGGGTF  DVSLLTIEEG  IFEVKATAGD  THLGGEDFDN  RLVNHFVAEF
251 RRKHKKDIST  NARALRRLRT  ACERAKRTLS  STSQTTIEID  SLYEGIDFYS
301 TITRARFEEL  NMDLFRKME  PVEKCLRDSK  IDKSQVDDIV  LVGGSTRIPK
351 VQQLLQDFFN  GKELCKSINP  DEAVAYGAAV  QAAILSGEGD  QKVQELLLLD
401 VTPLSLGIET  AGGVMTVLIP  RNTIIPAKKE  QIFSTYSDNQ  PGVLIQVYEG
451 ERARTKDNNL  LGTFELKGIP  PAPRGVPQIN  VCFDIDANGI  LNVS AEDKTA
501 GVKNKITITN  DKGRLSKEDI  ERMVQEAEKY  KAEDQVKKK  VEAKNALENY
551 AYNMRNTVKD  EKFAGKLSA  DKQKIEKAID  ETIEWLDGNQ  LAEVDEFEDK
601 LKELEGLCNP  IVSKMYQGGA  GGDVPMGGGA  KPGSGYGNAS  SGGSGSGPKI
651  EEVD
```

Spot No.: 196

NCBI accession No.: [gi|224139936](#) Species: *Populus trichocarpa*

Protein name: predicted protein

PMF score: 82

Sequence coverage %: 15

Matched peptides No.: 80

Total peptides No.: 22

Calculated Mr: 68859

Calculated pI: 7.90

Probability Based Mowse Score:

Protein score is  $-10 \cdot \log(P)$ , where P is the probability that the observed match is a random event. Protein scores greater than 73 are significant ( $p < 0.05$ ).

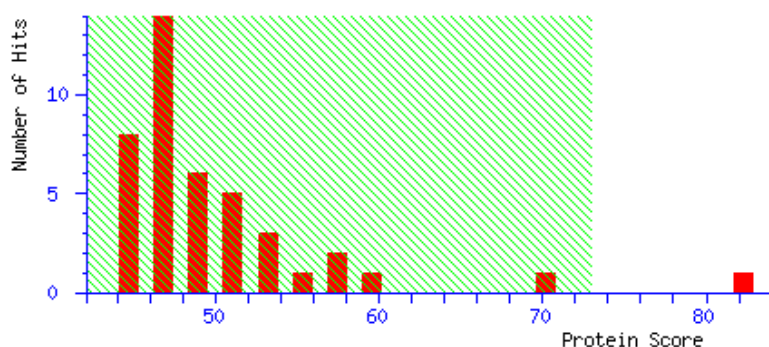

Matched peptide sequences: shown in **Bold Red**:

```
1  MGSMFLNSPL  PASNKLIRVS  SKCDWCFLRW  RKRNVVVYCQ  GGGGKAIRSS
51  GFPSVLTERS  AVVSDQEHIA  SVRDAGSLVL  SPNEKGQPEI  AVEDFVPYGG
101 PTSSSLLEMQ  DGIGIVKFLR  GKGLFISGAT  GFLAKVLIEK  ILRTMPDVGK
151 IYVLIKAESK  EAAITRLKNE  IINAELFKL  RQTHGKSYQS  FMLNKLVPVV
201 GNVCESNLGL  EEDLADKIAN  EVDIIVNSAA  NTTFDERYDV  AIDVNTRGIC
251 HLMSFAKKCP  KLKLFLQVST  AYVNGQRQGR  IMEKPFLFGD  CIARENLIS
301 ESTPRFAPAL  DIEHEMNLAL  DSKEAFQENE  VAQKMKELGL  ERARKYGWQD
351 TYVFTKAMGE  MVVDNMRGDI  PVVIIRPSVI  ESTCKEPFPG  WMEGNRMMDP
401 IVLYYGKGQL  TGFLVDPNGV  LDVVPADMVV  NATLAAMAWH  GMEQKPDINV
451 YQIASSVVNP  LVFQDLATLL  HEHYNSSPYM  DSNGRPIHVP  SMKLFSSMEE
501 FSAHLWRYVT  QRSRLAGMAT  SDRKLSQKHE  NICRKSVEQA  KYLASIYEPY
551 TFYGGRFDNS  NTQKLMERMS  ENEKGIFGFD  VGSIDWRDYI  TNVHIPGLRR
601 HVMKGRGMCG
```

Spot No.: 197

NCBI accession No.: [gi|351727028](#) Species: *Glycine max*

Protein name: [cell division cycle protein 48 homolog](#)

PMF Mascot score: 174

Sequence coverage %: 42

Matched peptides No.: 37

Total peptides No.: 90

Calculated Mr: 90512

Calculated pI: 5.18

Probability Based Mowse Score:

Protein score is  $-10 \cdot \log(P)$ , where P is the probability that the observed match is a random event. Protein scores greater than 73 are significant ( $p < 0.05$ ).

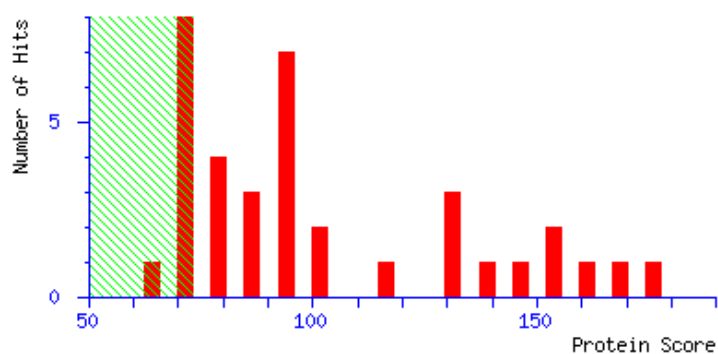

Matched peptide sequences: shown in **Bold Red**:

```
1 MSQQGESSDF KSGKKDFSTA ILERKKSPNR LVVDEAVNDD NSVVTMHPQT
51 MEKLQLFRGD TILIKGKRRK DTICIALADE NCEEPKIRMN KVVRSNLRVR
101 LGDVVSVHQC PDVKYGKRVH ILPIDDTIEG VTGNLFD AFL KPYFLEAYRP
151 VRKGDLFLVR GGMRSVEFKV VETDPGEYCV VAPDTEIFCE GEPLKREDEE
201 RLDEVGYYDDV GGVRKQMAQI RELVELPLRH PQLFKSIGVK PPKGILLYGP
251 PGSGKTLIAR AVANETGAFF FCINGPEIMS KLAGESESNL RKAFEEAEKN
301 APSIIFIDEI DSIAPKREKT HGEVERRIVS QLLTLMDGLK SRAHVIVIGA
351 TNRPNSIDPA LRRFGRFDRE IDIGVPDEVG RLEVLRIHTK NMKLSDDVDL
401 ERIAKDTHGY VGADLAALCT EAALQCIREK MDVIDLEDET IDAEVLNSMA
451 VTNEHFQTAL GTSNPSALRE TVVEVPNVSW EDIGGLENVK RELQETVQYP
501 VEHPEKFEKF GMSPSKGVLF YGPPGCGKTL LAKAIANECQ ANFISVKGPE
551 LLTMWFGESE ANVREIFDKA RQSAPCVLFF DELDSIATQR GSSVGDAGGA
601 ADRVLNQLLT EMDGMSAKKT VFIIGATNRP DIIDPALLRP GRLDQLIYIP
651 LPDEDSRHQI FKACLRKSPI AKNVDLRALA RHTQGFSGAD ITEICQRACK
701 YAIRENIEKD IERERKSREN PEAMDEDTV DEVAEIKAAH FEESMKFARR
751 SVSDADIRKY QAFAQTLQQS RGFGEFRFP ESGDRTTTGS DPFAASAGGA
801 DEDDLYS
```



Spot No.: **198**

NCBI accession No.: **gi|4235430** Species: *Hevea brasiliensis*

Protein name: latex-abundant protein

**PMF** Mascot score: **180**

Sequence coverage %: **76**

Matched peptides No.: **22**

Total peptides No.: **58**

Calculated Mr: **46443**

Calculated pI: **5.01**

Probability Based Mowse Score:

Protein score is  $-10 \cdot \log(P)$ , where P is the probability that the observed match is a random event. Protein scores greater than 73 are significant ( $p < 0.05$ ).

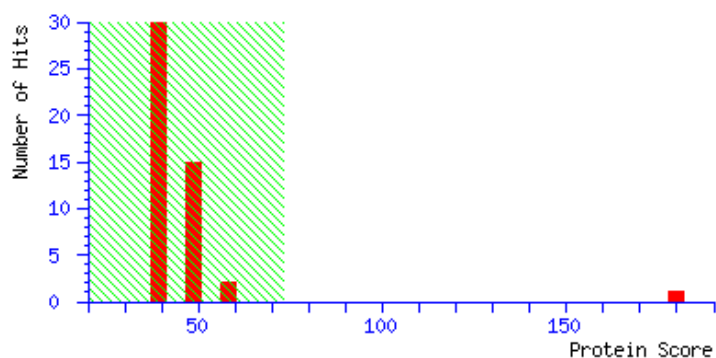

Matched peptide sequences: shown in **Bold Red**:

```
1  MAKKAVLIGI  NYPGTKAELK  GCINDVKRMY  RCLVDRYGFS  EEDITVLLDI
51  DESYIQPTGK  NIRRVLTDLV  RSAEPGDLLF  VHYSGHGTRL  PAETGEDDDT
101 GFDECIVPCD  MNLITDDDFR  EFVDQVPHGC  RITVVSDSCH  SGGLIDEAKE
151 QIGESTKRKE  EESESGFGFK  SFLKQTIQDA  FESRGVHLPS  DLHHHHGHRD
201 EEDFDNRVVE  EDYGDSGYVK  SKSLPLSTLI  EILKQKTGKD  DIDVGKLRPT
251 LDFMFGDDAS  PRVKKFMKVI  LNKLRHGDGE  SGGGGFLGMV  GSLAQEFLKH
301 KLDENDESIV  KPALETEVDS  KQEVYAGKTK  RSLPDGGILI  SGCQTDQ TSA
351 DASPSGKSSE  AYGALSNAIQ  TIIAETDGAV  TNQELVLKAR  KMLKKQGFTQ
401 KPGLYCSDDH  VEASFVC
```

Spot No.: 199

NCBI accession No.: [gi|198400319](#) Species: *Camellia sinensis*

PFF score: [57]

Protein name: [senescence-related protein](#)

Matched peptides No.: [1]

Sequence coverage %: [2]

Matched sequences: [K.GILWCGDVTVDRL](#)

Calculated Mr: 48662

Calculated pI: 4.96

Probability Based Mowse Score:

Ions score is  $-10 \cdot \log(P)$ , where P is the probability that the observed match is a random event.

Individual ions scores > 45 indicate identity or extensive homology ( $p < 0.05$ ).

Protein scores are derived from ions scores as a non-probabilistic basis for ranking protein hits.

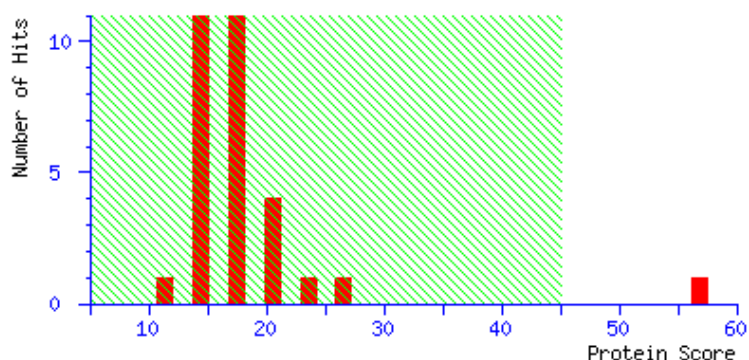

Matched peptide sequences: shown in **Bold Red**:

```
1  MSSQNPKNSL  YPQVDQSNPE  AISSSSSSPS  SSTIYPSIDM  KDLAENLFPD
51  NDSQNPNSQS  QLESSEEILI  RVPGTIVHLI  DKEQSVELAC  GELTIVRLLQ
101 GGNVVAVLAR  IDDQIQWPLA  KDEAAVKLDE  SHYFFTLRVP  SEAGFDNEED
151 NDEVNMESEN  LLNYGVTIAS  KGQEGLEAF  DSILEHYSAF  SVQKVSEAVD
201 GSVVARETSP  EEMESEEEKR  EMMEGSSAAY  WTLAPNVED  YSGNVARMIA
251 VGSQQLIKGI  LWCGDVTVDRL  LKWGNEFLKK  KLGPAQTKI  SPQAMRRMKR
301 VKLLTKMSEE  VATGILSGVV  KVSQFFTSSI  VNSSVGKKFF  SLLPGEIVLA
351 SLDGFNKVCD  AVEVAGRNVN  STTSVVTGL  VSQRYGEQAA  KVTNEGFDA
401 GHAIGIAWAV  FKIRKALNPK  SVIKPTTLAK  AAAETNYAAL  KAKSNKQT
```



Spot No.: **200**

NCBI accession No.: **gi|255570457** Species: *Ricinus communis*

**PFF** score: **[282]**

Protein name: **protease C56, putative**

Matched peptides No.: **[3]**

Sequence coverage %: **[8]**

Matched sequences: **R.APEYLAMNESVLDCVR.K;**

**R.APEYLAMNESVLDCVR.K + Oxidation (M);**

**R.APEYLALDETVIALVK.Q**

Calculated Mr: **42437**

Calculated pI: **5.60**

Probability Based Mowse Score:

Ions score is  $-10 \cdot \log(P)$ , where P is the probability that the observed match is a random event. Individual ions scores  $> 43$  indicate identity or extensive homology ( $p < 0.05$ ). Protein scores are derived from ions scores as a non-probabilistic basis for ranking protein hits.

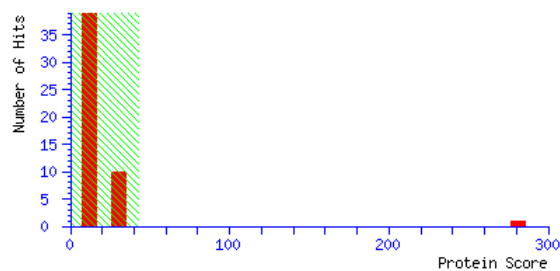

Matched peptide sequences: shown in **Bold Red**:

```
1  MSHQKTVFLL  CGDYMEDYEA  MVPFQALLAY  GVAVDAACPG  KKAGDYCRTA
51  IHESSEGHQTY  SESRGNFTL   NSTFDDIDFG  KYDGLVIPGG  RAPEYLAMNE
101 SVLDCVRKFA  DAGKPIASVC  HGQLILAAAG  LVKGRKCTAY  PPVRPVLIAA
151  GAHWVEPETM  ASCVADGNLI  TGATYEGHPE  FIQLFVKALG  GSITGADKRI
201  LFLCGDYMED  YEVTVPFQSL  QALGCHVNAV  CPKKKAGDSC  PTAVHDFEGD
251  QTYSEKPGHH  FTLTASYVGL  DVSSYDALVL  PGGRRAPEYLA  LDETVIALVK
301  QFMQSKKPVA  SICHGQQILA  AAGVLKGGKC  TAYPAVKLVN  VLSGATWLEP
351  DPIDRCYTDE  NLVTGAAWPG  HPEFISQLMA  LLGIRVSF
```

Spot No.: **201**

NCBI accession No.: **gi|32186896** Species: *Gossypium hirsutum*

Protein name: **actin**

**PMF** Mascot score: **149**

Sequence coverage %: **57**

Matched peptides No.: **21**

Total peptides No.: **38**

Calculated Mr: **41935**

Calculated pl: **5.44**

Probability Based Mowse Score:

Protein score is  $-10 \cdot \log(P)$ , where P is the probability that the observed match is a random event. Protein scores greater than 73 are significant ( $p < 0.05$ ).

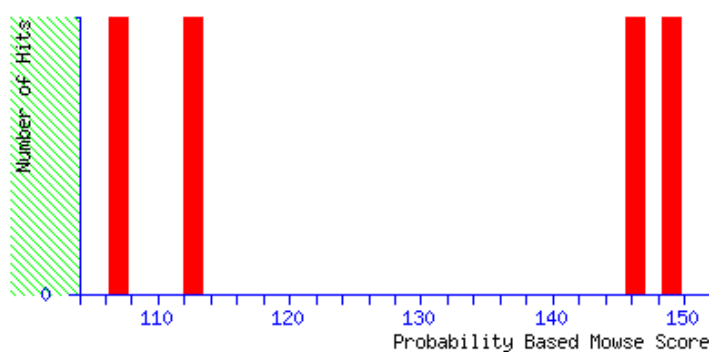

Matched peptide sequences: shown in **Bold Red**:

1 MADGEDIQPL VCDNGTGMVK **AGFAGDDAPR** **AVFPSIVGRP** **RHTGVMVGMG**  
51 **HKDAYVGDEA** **QSKRGILTLK** YPIEHGIVSN WDDMEKIWHH TFYNELRVAP  
101 **EEHPVLLTEA** **PLNPKANREK** MTHIMFETFN VPAMYVAIQV VLSLYASGRT  
151 **TGIVLDSDGD** **VSHTVPIYEG** **YALPHAILRL** **DLAGRDLTDA** **LMKILTERGY**  
201 **MFTTTAEREI** **VRDMKEKLAY** **VALDYEQELE** **TAKSSSSVEK** **NYELPDGQVI**  
251 **TIGAERFRCP** EVLFQPSFIG MEAAGIHETT YNSIMKCDVD IRKDLYGNIV  
301 **LSGGSTMFPF** **IAD RMSKEIT** ALAPSSMKIK **VVAPPERKYS** VWIGGSILAS  
351 LSTFQQMWIS **KGEYDESGPS** **IVHRKCF**

Spot No.: **202**

NCBI accession No.: **gi|255560725** Species: *Ricinus communis*

Protein name: **dead box ATP-dependent RNA helicase, putative**

**PMF** Mascot score: **109**

Sequence coverage %: **54**

Matched peptides No.: **21**

Total peptides No.: **76**

Calculated Mr: **47097**

Calculated pI: **5.49**

Probability Based Mowse Score:

Protein score is  $-10 \cdot \log(P)$ , where P is the probability that the observed match is a random event. Protein scores greater than 73 are significant ( $p < 0.05$ ).

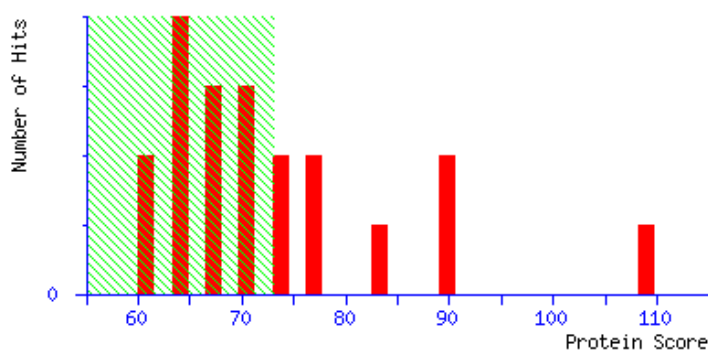

Matched peptide sequences: shown in **Bold Red**:

```
1  MAGLAPEGSQ  FDAKQYDAKM  SELLSTEGQE  FFTTYDEVYD  SFDAMGLQEN
51  LLRGIYAYGF  EKPSAIQQRG  IVPFCKGLDV  IQQAQSGTGK  TATFCSGILQ
101 QLDYGLVQCQ  ALVLAPTREL  AQQIEKVMRA  LG DYLGVKVH  ACVGGTSVRE
151 DQRILQAGVH  VVVGTPGRVF  DMLRRQSLRP  DYIKMFVLDE  ADEMLSRGFK
201 DQIYDIFQLL  PAKVQGVFVS  ATMPPEALEI  TRKFMNKPVR  ILVKRDELTL
251 EGIKQFYVNV  EKEEWKLETL  CDLYETLAIT  QSVIFVNTRR  KVDWLTDKMR
301 SRDHTVSATH  GDMDQNTRDI  IMREFRSGSS  RVLITDILLA  RGIDVQQVSL
351 VINYDLPTQP  ENYLHRIGRG  GRFGRKGVAI  NEVTRDDERM  LFDIQKFYNV
401 VIEELPSNVA  DLL
```

Spot No.: **203**

NCBI accession No.: **gi|14423688** Species: *Hevea brasiliensis*

**PFF** score: **[229]** Protein name: **Enolase 1**

Matched peptides No.: **[3]** Sequence coverage %: **[10]**

Matched sequences: **R.AGWGVMASHR.S + Oxidation (M);**

**R.AAVPSGASTGIYEALR.D;**

**R.IEEELGSEAVYAGANFR.K**

Calculated Mr: **48029**

Calculated pI: **5.57**

### Probability Based Mowse Score:

Ions score is  $-10 \cdot \log(P)$ , where P is the probability that the observed match is a random event. Individual ions scores  $> 45$  indicate identity or extensive homology ( $p < 0.05$ ). Protein scores are derived from ions scores as a non-probabilistic basis for ranking protein hits.

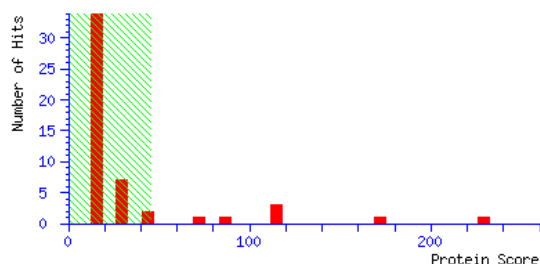

Matched peptide sequences: shown in **Bold Red**:

```
1 MAITIVSVRA RQIFDSRGNP TVEADVKLSD GYLARAAAVPS GASTGIYEAL
51 ELRDGGSDYL GKGVSKAVEN VNIIIGPALV GKDPTDQVGI DNFMVQQLDG
101 TVNEWGWCKQ KLGANAILAV SLAVCKAGAH VKGIPLYEHI ANLAGNKNLV
151 LPVPAFNVIN GGS HAGNKLA MQEFMILPVG ASSFKEAMKM GAEVYHHLKS
201 VIKKKYGQDA TNVGDEGGFA PNIQENKEGL ELLKTAIAKA GYTGVVIGM
251 DVAASEFYGS DQTYDLNFKE ENNNGSQKIS GEALKDLYKS FVAEYPIVSI
301 EDPFDQDDWA HYAKLTSEIG EKVQIVGDDL LVTNPKRVEK AIKEKACNAL
351 LLKVNQIGSV TESIEAVKMS KRAGWGMAS HRSGETEDTF IADLSVGLAT
401 GQIKTGAPCR SERLAKYNQL LRIEEELGSE AVYAGANFRK PVEPY
```

Spot No.: **204**

NCBI accession No.: **gi|186898205** Species: *Hevea brasiliensis*

**PFF** score: **[311]** Protein name: **senescence-related protein**

Matched peptides No.: **[10]** Sequence coverage %: **[13]**

Matched sequences: **R.LSKEEIER.M;**

**R.LVNHFVAEFK.G;**  
**R.FEELNMDLFR.K;**  
**R.FEELNMDLFR.K + Oxidation (M);**  
**R.TTPSYVAFTDTER.L;**  
**R.ARFEELNMDLFR.K;**  
**R.ARFEELNMDLFR.K + Oxidation (M);**  
**K.ATAGDTHLGGEDFDNR.L;**  
**K.NAVITVPA YFNDSQR.Q;**  
**R.IINEPTAAAIA YGLDKK.G**

Calculated Mr: **72036**

Calculated *pl*: **5.27**

Probability Based Mowse Score:

Ions score is  $-10 \cdot \log(P)$ , where P is the probability that the observed match is a random event. Individual ions scores  $> 46$  indicate identity or extensive homology ( $p < 0.05$ ). Protein scores are derived from ions scores as a non-probabilistic basis for ranking protein hits.

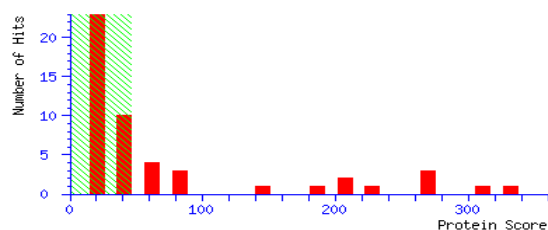

Matched peptide sequences: shown in **Bold Red**:

```
1 MAPKTEGKAI GIDLGTIYSC VGVWQNDRVE IIANQGNRT TSPSYVAFTDT
51 ERLIGDAAKN QVAMNPQNTV FDAKRLIGRR FSDPSVQSDM KHWPFKVISG
101 PGDKPMIVVQ YKGEEKQFAP EEISSMVLTK MKEIAEAYLG QTVKNAVITV
151 PAYFNDSQRQ ATKDAGAIAG VNVMRIIINEP TAAAIA YGLD KKGSSTGEKN
201 VLIFDLGGGT FVSLLTIEE GIFEVKATAG DTHLGGEDFD NRLVNHFVAE
251 FKGKHKKDIS TNARALRRLR TARERAKRTL SSTSQTIEI DSYEGIDFY
301 ATITRARFEE LNMDLFRKCM EPVEKCLRDS KIDKSQVHDV VLVGGSTRIP
351 KVQQLLQDIF NGKELCKSIN PDEAVAYGAA VQAAILSSEG DEKVQDLLLL
401 DVTPLSLGIE TAGGVMTVLI PRNTIPTKK EQIFSTYS DN QPGVLIQVYE
451 GERARTKDNN LLGKFELTGI PPAPRGVPQI NVCFDIDANG IVNVAEDKT
501 AGVKNKITIT NDKGRLSKEE IERMVQEA EK YKAEDEEVKK KVEAKNSLEN
551 YAYNMRNTVK DDKFAGKLAP ADKGKIEKAI DETIEWLDRN QLAEVEEFED
601 KLKELEGLCN PIIAKMYQGG AGGDVPVGGGA EMPNSNYGKT SSGGSGAGPK
651 IEEVD
```

Spot No.: **205**

NCBI accession No.: **gi|255537027** Species: *Ricinus communis*

**PFF** score: **[63]**

Protein name: **heat shock protein 70 (HSP70)-interacting protein,**

Matched peptides No.: **[2]** Sequence coverage %: **[5]**

Matched sequences: **K.LVNAGIVQIR.-;**

**K.HDPQNQELLDGVR.R**

Calculated Mr: **65386**

Calculated *pl*: **5.60**

Probability Based Mowse Score:

Ions score is  $-10 \cdot \log(P)$ , where P is the probability that the observed match is a random event. Individual ions scores > 45 indicate identity or extensive homology ( $p < 0.05$ ). Protein scores are derived from ions scores as a non-probabilistic basis for ranking protein hits.

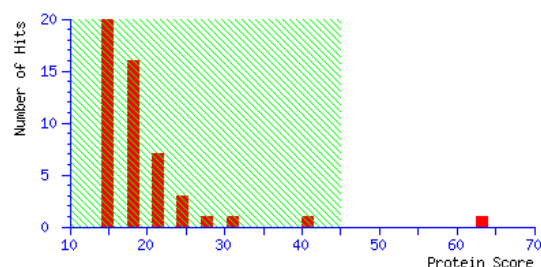

Matched peptide sequences: shown in **Bold Red**:

```
1 MAEEAKAKGN AAFSAGDFTT AVKHFTEAIS IAPSNHVLYS NRSAAALASLH
51 NYADALTDK KTVELKPDWS KGYSRLGAAY LGLNQTQDAI SAYKKGLDID
101 PSNEALKSGL ADAQARFSAP PPPSPFGDA FNGPEMWAKL TADPSTRMYL
151 QQPDFVKMMQ EIQKNPNNLN LYLKQQRVMQ ALGVLLNLKF RAPNAGAEDM
201 EVPQEDDHSS SPPPQAEQPA KKAPQPEPEP EPMDVITEED KEAKERKAQA
251 VKEKELGNAA YKQKDFETAI SHYTTALELD DEDISYLTNR AAVYLEMGKY
301 EDCIKDCDKA VERGRELRSD FKMIARALTR KGTALVKMAK SSKDYDSAIE
351 TFQKALTEHR NPETLKKLNE AERAKKELEQ QEYFDPKLAD EEREKGNEYF
401 KQQKYPEAVK HYTESLRRNP EDPRAYSNRA ACYTKLGALP EGLKDAEKCI
451 ELDPTFTKGY TRKGAVQFFM KEYDKALETY QEGLKHDPQN QELLDGVRRC
501 VEQLNKASRG DLSPEELKER QAKAMQDPEI QNILSDPVMR QVLVDFQENP
551 KSAQDHMKNP MVMNKIQKLV NAGIVQIR
```

Spot No.: 206

NCBI accession No.: gi|302853426

Species: *Volvox carteri f. nagariensis*

Protein name: **hypothetical protein VOLCADRAFT\_77867**

PMF score: 81

Sequence coverage %: 33

Matched peptides No.:14

Total peptides No.:69

Calculated Mr: 65036

Calculated pI:8.96

Probability Based Mowse Score:

Protein score is  $-10 \cdot \log(P)$ , where P is the probability that the observed match is a random event.  
Protein scores greater than 73 are significant ( $p < 0.05$ ).

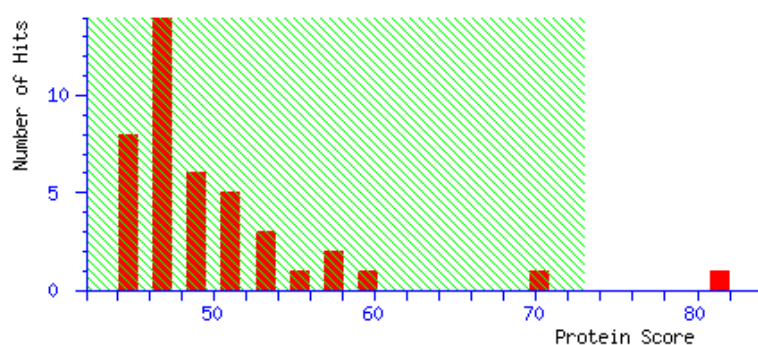

Matched peptide sequences: shown in **Bold red**:

```
1  MIKQQYLGQE  KIKKRVSRNG  GMGSRCSRW  RRGRWSLKPI  VTNTPLTPCS
51 EAALMFGRGM RAGIDRREQK  KAAASLEAEL  LRKARSAAGL  VETAETREHD
101 RERKRLLADQY DGFDMRIEKH  WTEKSLEEMT  ERDWRIFRED  FNIGYRGVNT
151 VLPIRKWEES  GLPSLLIKAI  DRVGYKKPSP  IQMAAIPLGL  QQRDVIGIAE
201 TGSGKTAA FV  LPMSYIMRQ  PPMTEENEAD  GPYAVVLAPT  RELAQQIEEE
251 THKLAYYTNY  RIASVVGQS  IEEQGAKLRK  GCEIVIATPG  RLDLCIDRHY
301 AVLNQCNYVV  LDEADRMIDL  GFEPQVIGVL  DAMPSSFLKP  DEDGAVLEAN
351 RTYRTTYMFS  ATMPPAVERL  AKKYLRRPVV  VVIGSAGKVT  DNVTQRVFVV
401 KENEKPRVLE  QEMESVDEKR  VIVFVNTQRQ  CDNVRHLEE  LGYRCTILHG
451 GKTQDQREAG  IKGFRDGTYN  CLIATDVAGR  GIDVPDVALV  INYDMPNNIE
501 NYTHRIGRTG  RAGKKGAVT  FLTLGDTGVF  YDLKKLEES  KAAVPELAR
551 HEASKLKPGS  IEAKSRKDQT  VFAA
```



Spot No.: **207**

NCBI accession No.: **gi|255537027** Species: *Ricinus communis*

PFF score: **[266]**

Protein name: **heat shock protein 70 (HSP70)-interacting protein,**

Matched peptides No.: **[3]** Sequence coverage %: **[5]**

Matched sequences: **K.LVNAGIVQIR.-;**

**K.NPNNLNLYLK.D;**  
**R.MYLQQPDFVK.M + Oxidation (M);**  
**R.QVLVDFQENPK.S;**  
**K.LGALPEGLKDAEK.C;**  
**K.HDPQNQELLDGVR.R;**  
**K.ALETYQGLKHDPQNQELLDGVR.R**

Calculated Mr: **65386**

Calculated *pI*: **5.60**

Probability Based Mowse Score:

Ions score is  $-10 \cdot \log(P)$ , where P is the probability that the observed match is a random event. Individual ions scores  $> 45$  indicate identity or extensive homology ( $p < 0.05$ ). Protein scores are derived from ions scores as a non-probabilistic basis for ranking protein hits.

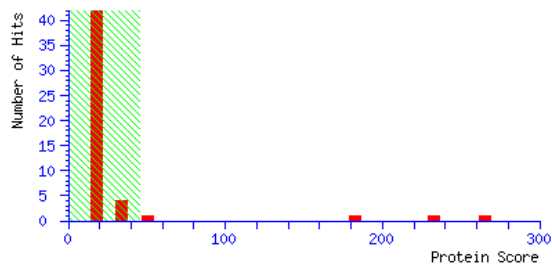

Matched peptide sequences: shown in **Bold Red**:

```
1 MAEEAKAKGN AAFSAGDFTT AVKHFTEAIS IAPSNHVLYS NRSAALASLH
51 NYADALTDAK KTVELKPDWS KGYSRLGAAY LGLNQTQDAI SAYKKGLDID
101 PSNEALKSGL ADAQARFSAP PPPSPFGDA FNGPEMWAKL TADPSTRMYL
151 QQPDFVKMMQ EIQKNPNNLN LYLKDQRMQ ALGVLLNLKF RAPNAGAEDM
201 EVPQEDDHSS SPPPQAEQPA KKAPQPEPEP EPMDVITEED KEAKERKAQA
251 VKEKELGNAA YKQKFETAI SHYTTALELD DEDISYLTNR AAVYLEMGKY
301 EDCIKDCDKA VERGRELRS DFKMIARALTR KGTALVKMAK SSKDYDSAIE
351 TFQKALTEHR NPETLKKLNE AERAKKELEQ QEYFDPKLAD EEREKGNEYF
401 KQQKYPEAVK HYTESLRRNP EDPRAYSNRA ACYTKLGALP EGLKDAEKCI
451 ELDPFTFKGY TRKGAVQFFM KEYDKALETY QEGLKHDPQN QELLDGVRRC
501 VEQLNKASRG DLSPEELKER QAKAMQDPEI QNILSDPVMR QVLVDFQENP
551 KSAQDHMKNP MVMNKIQKLV NAGIVQIR
```



Spot No.: **208**

NCBI accession No.: **gi|255537027** Species: *Ricinus communis*

PFF score: **[68]**

Protein name: **heat shock protein 70 (HSP70)-interacting protein,**

Matched peptides No.: **[2]** Sequence coverage %: **[5]**

Matched sequences: **K.LVNAGIVQIR.-;**

**K.HDPQNQELLDGVR.R**

Calculated Mr: **65386**

Calculated pI: **5.60**

Probability Based Mowse Score:

Ions score is  $-10 \cdot \log(P)$ , where P is the probability that the observed match is a random event. Individual ions scores  $> 45$  indicate identity or extensive homology ( $p < 0.05$ ). Protein scores are derived from ions scores as a non-probabilistic basis for ranking protein hits.

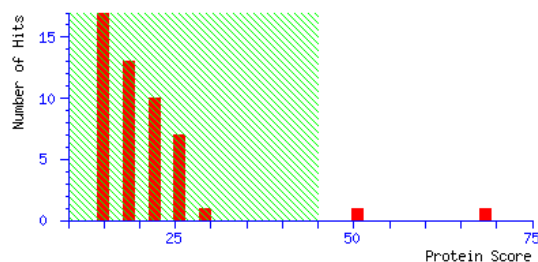

Matched peptide sequences: shown in **Bold Red**:

```
1 MAEEAKAKGN AAFSAGDFTT AVKHFTEAIS IAPSNHVLYS NRSAALASLH
51 NYADALTDK KTVELKPDWS KGYSRLGAA Y LGLNQTQDAI SAYKKGLDID
101 PSNEALKSGL ADAQARFSAP PPPSPFGDA FNGPEMWAKL TADPSTRMYL
151 QQPDFVKMMQ EIQKNPNNLN LYLKDQRMVQ ALGVLLNLKF RAPNAGAEDM
201 EVPQEDDHSS SPPPQAEQPA KKAPQPEPEP EPMDVITEED KEAKERKAQA
251 VKEKELGNAA YKQKDFETAI SHYTTALELD DEDISYLTNR AAVYLEMGKY
301 EDCIKDCDKA VERGRELRS D FKMIARALTR KGTALVKMAK SSKDYDSAIE
351 TFQKALTEHR NPETLKKLNE AERAKKELEQ QEYFDPKLAD EEREKNEYF
401 KQQKYPEAVK HYTESLRRNP EDPRAYSNRA ACYTKLGALP EGLKDAEKCI
451 ELDPTFTKGY TRKGAVQFFM KEYDKALETY QEGLKHDPQN QELLDGVRRC
501 VEQLNKASRG DLSPEELKER QAKAMQDPEI QNILSDPVMR QVLVDFQENP
551 KSAQDHMKNP MVMNKIQKLV NAGIVQIR
```

Spot No.: **209**

NCBI accession No.: **gi|1346735** Species: *Ricinus communis*

**PFF** score: **[161]**

Protein name: **2,3-bisphosphoglycerate-independent  
phosphoglycerate mutase**

Matched peptides No.: **[3]** Sequence coverage %: **[9]**

Matched sequences: **K.FGHVTFFWNGNR.S;**

**K.LPSHYLVSPPEIER.T;**

**K.AHGTAVGLPTEDDMGNSEVGHNALGAGR.I + Oxidation (M)**

Calculated Mr: **57374**

Calculated pI: **5.60**

Probability Based Mowse Score:

Ions score is  $-10 \cdot \log(P)$ , where P is the probability that the observed match is a random event. Individual ions scores  $> 45$  indicate identity or extensive homology ( $p < 0.05$ ). Protein scores are derived from ions scores as a non-probabilistic basis for ranking protein hits.

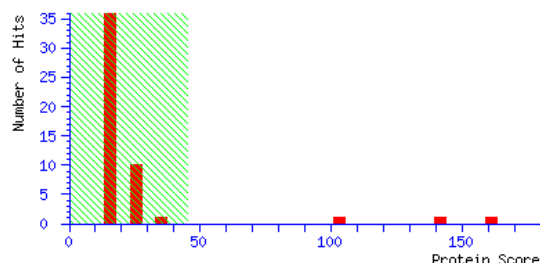

Matched peptide sequences: shown in **Bold Red**:

```
1  GEFTWKLADH  PKLPKGKTIA  MVVLDGWGEA  KPDQYNCIHV  AETPTMDSFK
51  KTAPERWRLI  KAHGTAVGLP TEDDMGNSEV GHNALGAGRI YAQGAKLVDL
101 ALASGKIYEG  EGFKYVKECF  DKGTLHLIGL  LSDGGVHSRL  DQLQLLLKGA
151 AEHGAKRIRV  HVLTDGRDVI  DGTSVGFAET  LEKDLENLRE  KGVDAQVASG
201 GGRMYVTMDR  YENDWNVVKR  GWDAQVLGEA  PYKFKSAVEA  IKKLREEPKA
251 NDQYLPPFVI  VDENGKPVGP  IVDGDAVVTI  NFRADRMVML  AKALEYENFD
301 TFDVRVFPKI  HYAGMLQYDG  ELKLP SHYLV SPPEIERTSG EYLVHNGVHT
351 FACSETVKFG HVTFFWNGNR SGYFNPEMEE  YVEIPSDVGI  TFNVQPKMKA
401 IEIAEKARDA  ILSGKFQQVR  VNIPNGDMVG  HTGDVEATVV  GCKAADEAVK
451 MIIDAIEQVG  GIYVVTADHG  NAEDMVKRDK  SGKPMADKSG  KIQILTSHTL
501 QVPVIAIGGP  GLTPGVRFRS  DIPTGGLANV  AATVMNLHGF  EAPSDYEPTL
551 IEAVDN
```

Spot No.: **210**

NCBI accession No.: **gi|255537027** Species: *Ricinus communis*

PFF score: **[69]**

Protein name: **heat shock protein 70 (HSP70)-interacting protein**

Matched peptides No.: **[3]** Sequence coverage %: **[5]**

Matched sequences: **K.LVNAGIVQIR.-;**

**K.HDPQNQELLDGVR.R;**

**K.ALETYQEGLKHDPQNQELLDGVR.R**

Calculated Mr: **65386**

Calculated *pI*: **5.60**

### Probability Based Mowse Score:

Ions score is  $-10 \cdot \log(P)$ , where P is the probability that the observed match is a random event. Individual ions scores  $> 45$  indicate identity or extensive homology ( $p < 0.05$ ). Protein scores are derived from ions scores as a non-probabilistic basis for ranking protein hits.

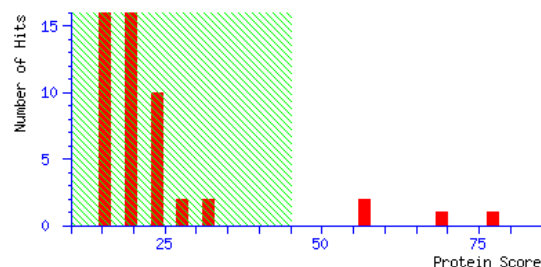

Matched peptide sequences: shown in **Bold Red**:

```
1 MAEEAKAKGN AAFSAGDFTT AVKHFTEAIS IAPSNHVLYS NRSAAALASLH
51 NYADALTDK KTVELKPDWS KGYSRLGAAY LGLNQTQDAI SAYKKGLDID
101 PSNEALKSGL ADAQARFSAP PPPSPFGDA FNGPEMWAKL TADPSTRMYL
151 QQPDFVKMMQ EIQKNPNNLN LYLKDQVMQ ALGVLLNLKF RAPNAGAEDM
201 EVPQEDDHSS SPPPQAEQPA KKAPQPEPEP EPMDVITEED KEAKERKAQA
251 VKEKELGNAA YKQKDFETAI SHYTTALELD DEDISYLTNR AAVYLEMGKY
301 EDCIKDCDKA VERGRELRS DFKMIARALTR KGTALVKMAK SSKDYDSAIE
351 TFQKALTEHR NPETLKKLNE AERAKKELEQ QEYFDPKLAD EEREKGNEYF
401 KQQKYPEAVK HYTESLRRNP EDPRAYSNRA ACYTKLGALP EGLKDAEKCI
451 ELDPTFTKGY TRKGAVQFFM KEYDKALETY QEGLKHDPQN QELLDGVRRC
501 VEQLNKASRG DLSPEELKER QAKAMQDPEI QNILSDPVMR QVLVDFQENP
551 KSAQDHMKNP MVMNKIQKLV NAGIVQIR
```

Spot No.: **211**

NCBI accession No.: [gi|255556934](https://www.ncbi.nlm.nih.gov/nuccore/gi|255556934) Species: *Ricinus communis*

PFF score: **[1185]**

Protein name: **Transitional endoplasmic reticulum ATPase, putative**

Matched peptides No.: **[15]** Sequence coverage %: **[26]**

Matched sequences: **R.DFSTAILER.K;** **K.GVLFGYPPGCGK.T;**  
**R.EIDIGVPDEVGR.L;** **R.LDEVGYYDDVGGVR.K;**  
**K.YQAFQAQTLQQSR.G;** **R.LGDVVSVHQCPDVK.Y;**  
**R.KYQAFQAQTLQQSR.G;** **R.LDQLIYIPLDEDSR.H;**  
**K.YTQGFSGADITEICQR.A;** **R.EDENRLDEVGYYDDVGGVR.K;**  
**R.AHVIVIGATNRPN SIDPALR.R;** **R.QSAPCVLFFDELDSIATQR.G;**  
**R.ELQETVQYPVEHPEKFEK.F;** **R.ETVVEVPNVSWEDIGGLENVKR.E;**  
**K.DTHGYVGADLAALCTEALQCIR.E**

Calculated Mr: **90355**

Calculated pI: **5.13**

Probability Based Mowse Score:

Ions score is  $-10 \cdot \log(P)$ , where P is the probability that the observed match is a random event. Individual ions scores  $> 45$  indicate identity or extensive homology ( $p < 0.05$ ). Protein scores are derived from ions scores as a non-probabilistic basis for ranking protein hits.

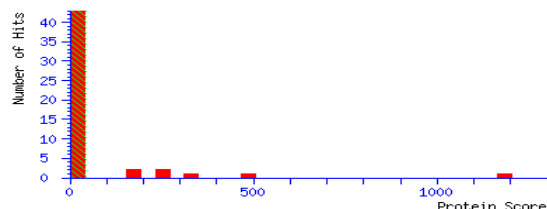

Matched peptide sequences: shown in **Bold Red**:

```
1 MSNQAESSDS KGTKRDFSTA ILERKKSPNR LVVDEAINDD NSVVS LHPET
51 MEK LQLFRGD TILIKGKRRK DTICIALADD SCDEPKIRMN KVVR SNLRVR
101 LGDVVSVHQC PDVKYGKRVH ILPIDDTIEG VTGNLFDAYL KPYFLEAYRP
151 VRKGD LFLVR GGMR SVEFKV IETDPAEYCV VAPDTEIFCE GEPVRREDEN
201 RLDEVGYDDV GGVRKQMAQI RELVELPLRH PQLFKSIGVK PPKGILLYGP
251 PGSGKTLIAR AVANETGAFF FCINGPEIMS KLAGESESNL RKAFAEEAEKN
301 APSIIFIDEI DSIAPKREKT HGEVERRIVS QLLTLM DGLK SRAHVIVIGA
351 TNRPNSIDPA LRRFGRFDRE IDIGVPDEVG RLEVLRIHTK NMKLAEDVDL
401 ERISKDTHGY VGADLAALCT EAALQCIREK MDVIDLEDET IDAEILNSMA
451 VSNEHFQIAL GTSNPSALRE TVVEVPNVSW EDIGGLENVK RELQETVQYP
501 VEHPEKPEKF GMSPSKGVLF YGPPGCGKTL LAKAIANECQ ANFISVKGPE
551 LLTMWFG ESE ANVREIFDKA RQSAPCVLFF DELDSIATQR GSSVGDAGGA
601 ADRVLNQ LLLT EMDGMSAKKT VFIIGATNRP DIIDPALLRP GRLDQLIYIP
651 LPDESRHQI FKACLRKSPV SKDVDLRALA KYTQGFSGAD ITEICQRACK
701 YAIRENIEKD IERERRRRDN PEAMEEDVED DVAEIKAAHF EESMKYARRS
751 VSDADIRKYQ AFAQTLQQSR GFGSEFRFSE ATGAAAGADP FAASAGGEAD
801 DDDLYS
```

Spot No.: **212**

NCBI accession No.: [gi|4588474](#)

Species: *Brassica napus*

PFF score: **[166]**

Protein name: [phosphoinositide-specific phospholipase C](#)

Matched peptides No.: **[3]**

Sequence coverage %: **[3]**

Matched sequences: [K.NDIDVLHGR.T](#);

[R.VIELDIWPNSNK.N](#);

[R.VIELDIWPNSNKNDIDVLHGR.T](#)

Calculated Mr: **66632**

Calculated pI: **5.79**

### Probability Based Mowse Score:

Ions score is  $-10 \cdot \log(P)$ , where P is the probability that the observed match is a random event. Individual ions scores  $> 45$  indicate identity or extensive homology ( $p < 0.05$ ). Protein scores are derived from ions scores as a non-probabilistic basis for ranking protein hits.

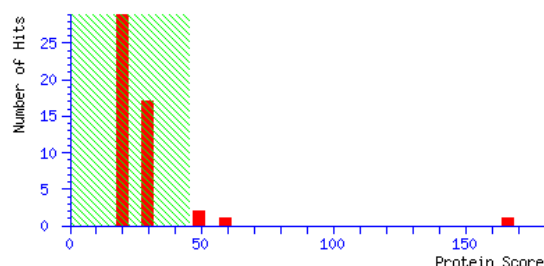

Matched peptide sequences: shown in **Bold Red**:

```
1 MSKQTYK VCF CFNRRFRYTA SEAPRDVKTL FDKYSENGVM TVDHLQRFLI
51 DVQKQDKATK EDAQSIINAA SSLLHSNGLH LDAFFKYLFG DSNPPLALHE
101 VHQMDAPIS HYFIFTGHNS YLTGNQLSSD CSEVPIIDAL KKGVRVIELD
151 IWPNSNKNDI DVLHGRTLTS PVELIKCLRA IKTHAFEVSD YPVVVTLEDH
201 LTPELQSKVA EMVTEIFGEI LFTPPVGESL KEFPSPNSLK RRIIISTKPP
251 KEYKEGKDED VVQKGKALGD EEVWGREVPS FIERNKSGDK DDLDEEDND
301 EDDVVEKFKK NAPPQYKHLI AIHAGKPKGS ITACLKVDPD KVRRLSLSEE
351 QLEKAAEKYA KQIVRFTQQN LLRIYPKGTR VTSSNYNPLV GWSHGAQMVA
401 FNMQGYGRSL WLMQGMFRAN GCGYIKKPD ILLKGGSDSD IFDPKTTLPV
451 KTTLRVTIYM GEGWYDFDRH THFDQYSPPD FYTRVGIAGV PADTVMKKTK
501 TLEDNWVPSW DEVFEFPLTV PELALLRLEV HEYDMSEKDD FGGQTCLPVW
551 ELQEGIRSFV LHNRRKEEKYK SVKLLVKVEF V
```

Spot No.: **213**

NCBI accession No.: [gi|4588474](#)

Species: *Brassica napus*

PFF score: **[116]**

Protein name: [phosphoinositide-specific phospholipase C](#)

Matched peptides No.: **[2]**

Sequence coverage %: **[3]**

Matched sequences: [K.NDIDVLHGR.T](#);

[R.VIELDIWPNSNKNDIDVLHGR.T](#)

Calculated Mr: **66632**

Calculated pl: **5.79**

Probability Based Mowse Score:

Ions score is  $-10 \cdot \log(P)$ , where P is the probability that the observed match is a random event. Individual ions scores  $> 45$  indicate identity or extensive homology ( $p < 0.05$ ). Protein scores are derived from ions scores as a non-probabilistic basis for ranking protein hits.

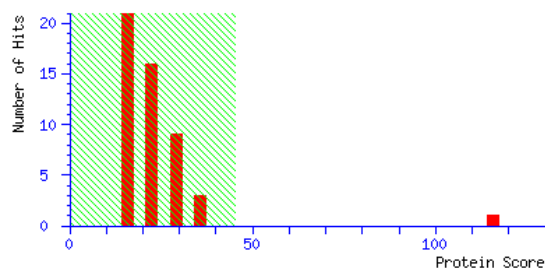

Matched peptide sequences: shown in **Bold Red**:

```
1 MSKQTYKVCF CFNRRFRYTA SEAPRDVKTL FDKYSENGVM TVDHLQRFLI
51 DVQKQDKATK EDAQSIINAA SLLHSNGLH LDAFFKYLFG DSNPPLALHE
101 VHQMDAPIS HYFIFTGHNS YLTGNQLSSD CSEVPIIDAL KKGVRVIELD
151 IWPNSNKNDI DVLHGRTLTS PVELIKCLRA IKTHAFEVSD YPVVVTLEDH
201 LTPELQSKVA EMVTEIFGEI LFTPPVGESL KEFSPNSLK RRIIISTKPP
251 KEYKEGKDED VVQKGKALGD EEVWGREVPS FIERNKSGDK DDLDEEDND
301 EDDVEKFKK NAPPQYKHLI AIHAGKPKGS ITACLKVDPD KVRRLSLSEE
351 QLEKAAEKYA KQIVRFTQQN LLRIYPKGR VTSSNYNPLV GWSHGAQMVA
401 FNMQGYGRSL WLMQGMFRAN GGCGYIKKPD ILLKGGSDSD IFDPKTTLPV
451 KTTLRVTIYM GEGWYDFDRH THFDQYSPPD FYTRVGIAGV PADTVMKKTG
501 TLEDNWVPSW DEVFEFPLTV PELALLRLEV HEYDMSEKDD FGGQTCLPVW
551 ELQEGIRSFP LHNKKEEKYK SVKLLVKVEF V
```

Spot No.: 215

NCBI accession No.: gi|32967699 Species: *Arabidopsis thaliana*

PFF score: [289]

Protein name: S-adenosyl-L-homocystein hydrolase

Matched peptides No.: [4] Sequence coverage %: [10]

Matched sequences: R.ITIKPQTDR.W;

K.SKFDNLYGCR.H;

K.GETLQEYWWCTER.A;

R.WVFPDTKSGIIVLAEGR.L

Calculated Mr: 53776

Calculated pI: 5.66

Probability Based Mowse Score:

Ions score is  $-10 \cdot \log(P)$ , where P is the probability that the observed match is a random event. Individual ions scores  $> 46$  indicate identity or extensive homology ( $p < 0.05$ ). Protein scores are derived from ions scores as a non-probabilistic basis for ranking protein hits.

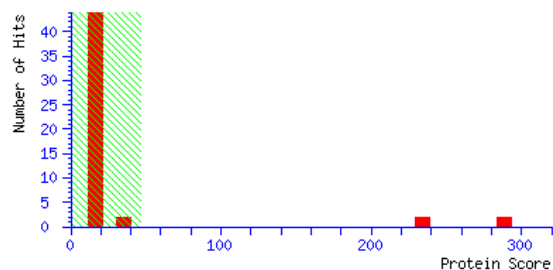

Matched peptide sequences: shown in **Bold Red**:

```
1 MALIVEKTSG GREYKVKDMS QADFGRLLE LAEVEMPGLM ACRTEFGPAQ
51 PFKGARITGS LHMTIQTAVL IETLTALGAE VRWCSCNIFS TQDHAAAAIA
101 RDSAAVFAWK GETLQEYWWC TERALDWGPG GGPDLIVDDG GDATLLIHEG
151 VKAEEIFEKT GQVPDPTSTD NPEFQIVLSI IKEGLQVDPK KYHKMKGRLV
201 GVSEETTTGV KRLYQMQESG ALLFPAINVN DSVTKSKFDN LYGCRHSLPD
251 GLMRATDVM IAGKVAVICGY GDVVGKCAAA MKTAGARVIV TEIDPICALQ
301 AMMEGLQVLT LEDVVSEADI FVTTTGNKDI IMVDHMRKMK NNAIVCNIGH
351 FDNEIDMQGL ETFFGVKRIT IKPQTDRWVF PDTKSGIIVL AEGRLMNLGC
401 ATGHPSFVMS CSFTNQVIAQ LELWNEKSSG KYEKKVYVLP KHLDEKVAAL
451 HLGKLGAKLT KLTKDQSDYV SIPIEGPYKP PHYRY
```



Spot No.: **216**

NCBI accession No.: [gi|336390551](#) Species: *Glycine max*

PFF score: **[327]**

Protein name: [adenosylhomocysteinase](#)

Matched peptides No.: **[7]** Sequence coverage %: **[21]**

Matched sequences: [R.HSLPDGLMR.A + Oxidation \(M\)](#);

[R.ITIKPQTDR.W](#);  
[K.SKFDNLYGCR.H](#);  
[K.GETLQEYWWCTER.A](#);  
[R.WVFPETNTGIIVLAEGR.L](#);  
[R.WCSCNIFSTQDHAAAAIAR.D](#);  
[R.ALDWGPGGPDLIVDDGGDATLLIHEGVK.A](#)

Calculated Mr: **53761**

Calculated pl: **5.69**

Probability Based Mowse Score:

Ions score is  $-10 \cdot \log(P)$ , where P is the probability that the observed match is a random event. Individual ions scores  $> 45$  indicate identity or extensive homology ( $p < 0.05$ ). Protein scores are derived from ions scores as a non-probabilistic basis for ranking protein hits.

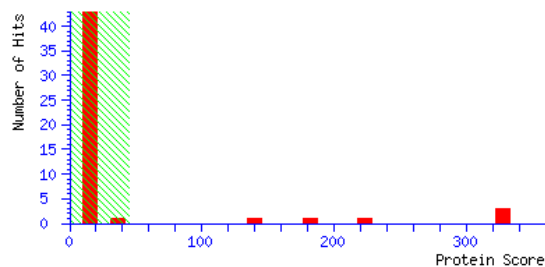

Matched peptide sequences: shown in **Bold Red**:

```
1 MALLVEKTTS GREYKVKDLS QADFGRLIEE LAEVEMPGLM ACRTEFGPSQ
51 PFKGARITGS LHMTIQTAVL IETLTALGAE VRWCSCNIFS TQDHAAAAIA
101 RDSAAVFAWK GETLQEYWWC TERALDWGPG GGPDLIVDDG GDATLLIHEG
151 VKAEELYEKT GELPDPNSTD NAEFQIVLTI IRDGLKTDPT RYRKMKERLV
201 GVSEETTTGV KRLYQMANG TLLFPAINVN DSVTKSKFDN LYGCRHSLPD
251 GLMRATDVMI AGKVAVVAGY GDVGKGCAAA MKQAGARVIV TEIDPICALQ
301 ALMEGLQVLT LEDVVSEADI FVTTTGNKDI IMVDHMRKMK NNAIVCNIGH
351 FDNEIDMLGL ENYPGVKRIT IKPQTDRWVF PETNTGIIVL AEGRLMNLGC
401 ATGHPSFVMS CSFTNQVIAQ LGLWKEKSIG KYEKKVYVLP KHLDEKVAAL
451 HLGKLGAKLT QLSKSQADYI SVPVEGPKYP AHYRY
```



Spot No.: **217**

NCBI accession No.: [gi|6136111](#) Species: *Hordeum vulgare*

PFF score: **[52]**

Protein name: [UTP--glucose-1-phosphate uridylyltransferase](#)

Matched peptides No.: **[1]** Sequence coverage %: **[2]**

Matched sequences: [R.FFEKAIGINVPR.S](#)

Calculated Mr: **51783**

Calculated pI: **5.20**

Probability Based Mowse Score:

Ions score is  $-10 \cdot \log(P)$ , where P is the probability that the observed match is a random event. Individual ions scores  $> 46$  indicate identity or extensive homology ( $p < 0.05$ ). Protein scores are derived from ions scores as a non-probabilistic basis for ranking protein hits.

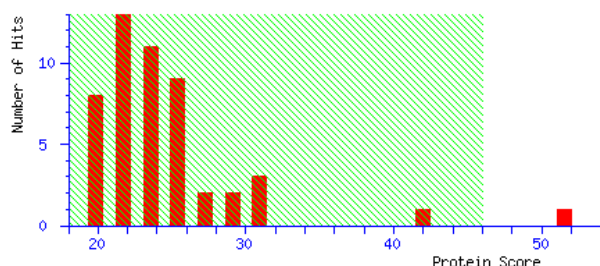

Matched peptide sequences: shown in **Bold Red**:

```
1  MAAAAVAADS  KIDGLRDAVA  KLGEISENEK  AGFISLVSRY  LSGEAEQIEW
51  SKIQTPTEV  VVPYDTLAPP  PEDLDAMKAL  LDKLVVLKLN  GGLGTTMGCT
101  GPKSVIEVRN  GFTFLDLIVI  QIESLNKKYG  CSVPLLLMNS  FNTHDDTQKI
151  VEKYSNSNIE  IHTFNQSQYP  RIVTEDFLPL  PSKGQTGKDG  WYPPGHGDVDF
201  PSLNNSGKLD  TLLSQGKEYV  FVANSNDLGA  IVDIKILNHL  IHNQNEYCME
251  VTPKTLADV  GGTLLSYEGR  VQLLEIAQVP  DEHVDEFKSI  EKFKIFNTNN
301  LWVNLKAIKR  LVDAEALKME  IIPNPKEVDG  VKVLQLETAA  GAAIRFFEKA
351  IGINVPRSRF  LPVKATSDLL  LVQSDLYTLV  DGYVIRNPAR  VKPSNPSIEL
401  GPEFKKVANF  LARFKSIPSI  VELDSLKVSG  DVSGSGVVL  KGNVTIAAKA
451  GVKLEIPDGA  VLENKDINGP  EDI
```

Spot No.: 218

NCBI accession No.: gi|14916100 Species: *Hevea brasiliensis*

PFF score: [802]

Protein name: hydroxymethylglutaryl coenzyme A

Matched peptides No.: [10] Sequence coverage %: [35]

Matched sequences: R.LVFNDFVR.N;

K.ARHELPPEK.F;

K.TFLMQIFEK.F + Oxidation (M);

K.VSQQVAKPLYDAK.V;

K.LAPFSNLSGDESYQNR.D;

R.YGLVVCTDSAVYAEGPAR.P;

K.QFSISDAEYFVFHSPYNK.L;

K.DCSLLASGTYYLTEVDSLVR.R;

R.GSHMSHAYDFYKPNLASEYPPVVDGK.L + Oxidation (M);

K.NVGILAVDIYFPPTFVQQEALAHGASK.G

Calculated Mr: 51761

Calculated pI: 6.86

Probability Based Mowse Score:

Ions score is  $-10 \cdot \log(P)$ , where P is the probability that the observed match is a random event. Individual ions scores  $> 45$  indicate identity or extensive homology ( $p < 0.05$ ). Protein scores are derived from ions scores as a non-probabilistic basis for ranking protein hits.

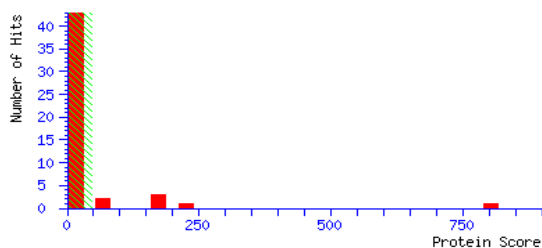

Matched peptide sequences: shown in **Bold Red**:

```
1  MAKNVGILAV  DIYFPPTFVQ  QEALAHGGA  SKGKYIIGLG  QDCMAFCTEV
51  EDVISMSLTA  VTSLLDKYNI  DPKQIGRLEV  GSETVIDKSK  SIKTFLMQIF
101 EKFGNTDIEG  VDSTNACYGG  TAALFNCVNW  VESSWDGRY  GLVVCTDSAV
151 YAEGPARPTG  GAAAIAILVG  PDAPIAFESK  FRGSHMSHAY  DFYKPNLASE
201 YPVVDGKLSQ  TCYLMALDSC  YKHFCAYEK  FEGKQFSISD  AEYFVFHSPY
251 NKLVQKSFAR  LVFNDFVRNA  RSIDETAKEK  LAPFSNLSGD  ESYQNRDLEK
301 VSQQVAKPLY  DAKVKPTTLI  PKQVGNMYTA  SLYAAFASLL  HSKHTELAGK
351 RVTLFSYSGS  LTATMFSLRL  HEGQHPFSL  NIASVMNVAG  KLKARHELPP
401 EKFVNIMKLM  EHRYGAKDFV  RSKDCSLLAS  GTYYLTEVDS  LYRRFYAQA
451 VGNTVENGLL  ANGH
```

Spot No.: **219**

NCBI accession No.: [gi|307707110](#) Species: *Prunus armeniaca*

PFF score: **[181]**

Protein name: **NAD-dependent malate dehydrogenase**

Matched peptides No.: **[4]** Sequence coverage %: **[19]**

Matched sequences: [R.LNVQVSDVK.N](#);

[K.VLVVANPANTNALILK.E](#);

[R.KLSSALSAASSACDHIR.D](#);

[K.NVIIWGNHSSTQYPDVNHATVK.T](#)

Calculated Mr: **34812**

Calculated pI: **5.92**

Probability Based Mowse Score:

Ions score is  $-10 \cdot \log(P)$ , where P is the probability that the observed match is a random event. Individual ions scores  $> 45$  indicate identity or extensive homology ( $p < 0.05$ ). Protein scores are derived from ions scores as a non-probabilistic basis for ranking protein hits.

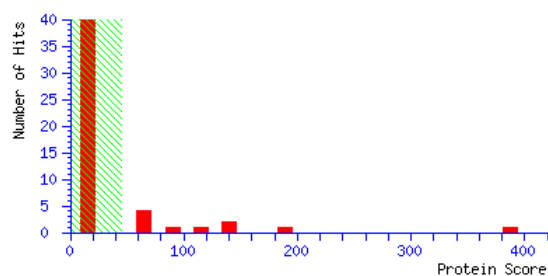

Matched peptide sequences: shown in **Bold Red**:

```
1 VTGAAGQIGY ALVPMIARGV MLGADQPVIL HLLDIPPAAE ALNGVKMELV
51 DAAFPLLKGV VATTDVVEAC TGVNIAVMVG GFPRKEGMER KDVMSKNVSI
101 YKSQASALEK HAAANCKVLV VANPANTNAL ILKEFAPSIP EKNITCLTRL
151 DHNRALGQVS ERLNVQVSDV KNVIIWGNHS STQYPDVNHA TVKTPSGEKA
201 VRELVADDAW LTGEFITTQV QRGAAIIKAR KLSSALSAAS SACDHIRDWV
251 LGTPEGTWVS MGVYSDGSYN VPSGLIYSFP VTCQNGEWKN VQGLSIDEFS
301 RKKLDATADE LSEEKALAYS CLS
```

Spot No.: **220**

NCBI accession No.: **gi|357137038**

Species: *Brachypodium distachyon*

PFF score: **[357]**

Protein name: **phosphoglycerate kinase, cytosolic-like**

Matched peptides No.: **[6]**

Sequence coverage %: **[20]**

Matched sequences: **K.KPFAAIVGGSK.V;**

**K.ELDYLVGAVANPK.K;**

**K.GVTTIIGGGDSVAAVEK.A;**

**K.LASVADLYVNDAFGTAHR.A;**

**K.KLASVADLYVNDAFGTAHR.A;**

**K.VVPASAIPDGWMGLDVGPDAIK.T + Oxidation (M)**

Calculated Mr: **42207**

Calculated pI: **5.64**

Probability Based Mowse Score:

Ions score is  $-10 \cdot \log(P)$ , where P is the probability that the observed match is a random event. Individual ions scores  $> 45$  indicate identity or extensive homology ( $p < 0.05$ ). Protein scores are derived from ions scores as a non-probabilistic basis for ranking protein hits.

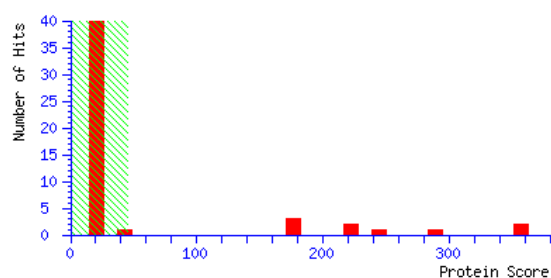

Matched peptide sequences: shown in **Bold Red**:

```
1  MATKRSVGTL  GEADLKGKKV  FVRADLNVPL  DDAQKITDDT  RIRASVPTIK
51  FLLEKGAKVI  LASHLGRPKG  VTPKFSLKPL  VPRLSELLGI  DVVMANDCIG
101 EEVEKLAAAL  PDGGVLLLEN  VRFYKEEEKN  DPEFAKKLAS  VADLYVNDAF
151 GTAHRAHAST  EGVTKFLRPS  VAGFLMQKEL  DYLVGAVANP  KKPFAAIVGG
201 SKVSSKIGVI  ESLLAKVDIL  ILGGGMIFTF  YKAQGLAVGK  SLVEEDKLEL
251 ATSLIETAKA  KGVKLLLPID  VVVADKFAAD  AESKVVPASA  IPDGWMGLDV
301 GPDAIKTFSE  ALDTCKTIIW  NGPMTGFVFE  KFAAGTDAIA  KQLAELTAKG
351 VTTIIGGGDS  VAAVEKAGLA  DKMSHISTGG  GASLELLEGK  PLPGVLALDE
401  A
```

Spot No.: **221**

NCBI accession No.: [gi|357514973](#) Species: *Medicago truncatula*

PFF score: **[99]**

Protein name: **Annexin D4**

Matched peptides No.: **[2]**

Sequence coverage %: **[3]**

Matched sequences: [K.LLVALVSAYR.Y](#);

[R.KLLVALVSAYR.Y](#)

Calculated Mr: **36283**

Calculated pI: **8.64**

Probability Based Mowse Score:

Ions score is  $-10 \cdot \log(P)$ , where P is the probability that the observed match is a random event. Individual ions scores  $> 45$  indicate identity or extensive homology ( $p < 0.05$ ). Protein scores are derived from ions scores as a non-probabilistic basis for ranking protein hits.

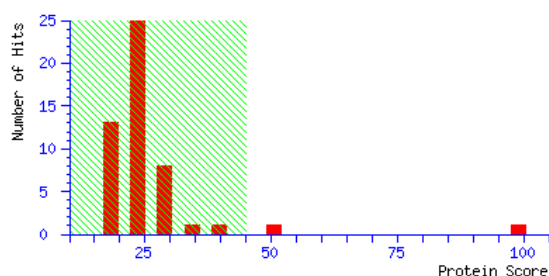

Matched peptide sequences: shown in **Bold Red**:

```
1  MAFNQELEAI  TQAFSGHGVD  EKSLIAVLGK  WDPLERETYR  KKTSHFFIED
51  HERQFQRWND  HCVRLKHEF  VRFKNAVVLW  SMHPWERDAR  LAKEALKKGS
101 ISYGVLEIEA  CTRSSEELG  ARKAYHSLFD  HSIEEDVASH  IHGNDRKLLV
151 ALVSAYRYEG  TKVKDDTAKS  EAKTLSNAIK  NAQNKPIVED  DEVIRILATR
201 SKLHLQAVYK  HYKEISGKNL  EEDLNDLRFK  ETVQCLCTPQ  VYFSKVLDAE
251 LKNDVNKNIK  KSLTRVIVTR  ADIDMKEIKA  EYNNLYGVSL  PQKIEETAKG
301 NYKDFLLTLI  ARGG
```

Spot No.: 222

NCBI accession No.: gi|21536853 Species: *Arabidopsis thaliana*

PFF score: [314]

Protein name: phosphoglycerate kinase, putative

Matched peptides No.: [6] Sequence coverage %: [17]

Matched sequences: K.YSLKPLVPR.L;

K.ELDYLVGAVANPK.K;  
K.YLKPSVAGFLMQK.E + Oxidation (M);  
K.GVSLLLPTDVVIADK.F;  
K.LAALADVYVNDVAFGTAHR.A;  
K.KLAALADVYVNDVAFGTAHR.A

Calculated Mr: 42178

Calculated pI: 5.49

Probability Based Mowse Score:

Ions score is  $-10 \cdot \log(P)$ , where P is the probability that the observed match is a random event. Individual ions scores > 45 indicate identity or extensive homology ( $p < 0.05$ ). Protein scores are derived from ions scores as a non-probabilistic basis for ranking protein hits.

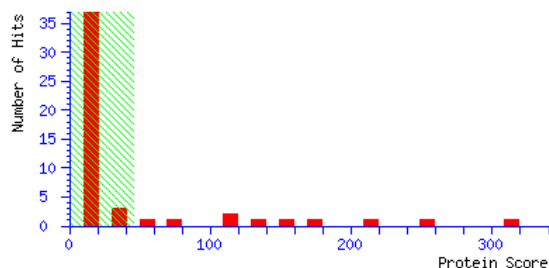

Matched peptide sequences: shown in **Red**:

```
1  MATKRSVGTI KEADLKGKSV FVRVDLNVPL DDNSNITDDT RIRAAVPTIK
51  YLMGNGSRVV LCSHLGRPKG VTPKYSLKPL VPRLSELLGV EVVMANDSIG
101 EEVQQLVAGL PEGGVLLLEN VRFYAEEEKN DPEFAKKLAA LADVYVNDVAF
151 GTAHRAHAST EGVAKYLKPS VAGFLMQKEL DYLVGAVANP KKPFAAIVGG
201 SKVSTKIGVI ELLNTVDIL LLGGGMIFTF YKAQGLSVGS SLVEEDKLDL
251 AKSLMEKAKA KGVSLLLPTD VVIADKFAPD ANSKIVPATA IPDGWMGLDI
301 GPDSIKTFSE ALDTTKTIIW NGPMGVFEFD KFAAGTEAVA KQLAELSGKG
351 VTTIIGGGDS VAAVEKVGLA DKMSHISTGG GASLELIEGK PLPGVLALDE
401 A
```

Spot No.: 223

NCBI accession No.: gi|255547137 Species: *Ricinus communis*

PFF score: [77]

Protein name: Alpha-1,4-glucan-protein synthase

Matched peptides No.: [2] Sequence coverage %: [5]

Matched sequences: K.DINALEQHIK.N;

K.VICDHLGFGVK.T

Calculated Mr: 41557

Calculated pI: 5.82

Probability Based Mowse Score:

Ions score is  $-10 \cdot \log(P)$ , where P is the probability that the observed match is a random event. Individual ions scores  $> 46$  indicate identity or extensive homology ( $p < 0.05$ ). Protein scores are derived from ions scores as a non-probabilistic basis for ranking protein hits.

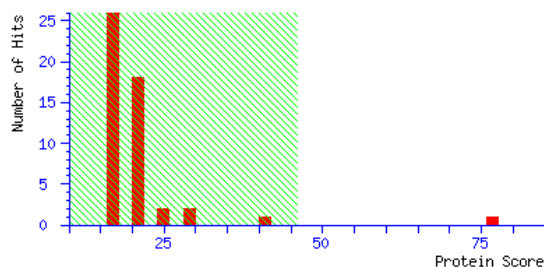

Matched peptide sequences: shown in **Bold Red**:

```
1 MADFAAISPT PLLKDELDIRV IPTIRNLDFL EMWRPFFQPY HLIIVQDGDV
51 SKIIKVPEGF DYELYNRNDI NRILGPKASC ISFKDSACRC FGYMVSKKKY
101 IYTIDDDCFV AKDPSGKDIN ALEQHIKNLL CPSTPFFFNT LYDPYRTGAD
151 FVRGYPFSLR EGVPTAVSHG LWLNIPDYDA PTQLVKPLER NTRYVDAVMT
201 IPKGTLFPMC GMNLAFNREL IGPAMYFGLM GDGQPIGRYD DMWAGWCTKV
251 ICDHLGFGVK TGLPYIYHSK ASNPFVNLKK EYKGIYWQEE LIPFFQSAVL
301 PKECTTVQKC YIELSKQVRA KLGKIDEYFV KLADAMVTWV EAWDELNPSG
351 NSGELPNGAA K
```

Spot No.: 224

NCBI accession No.: gi|380468126 Species: *Hevea brasiliensis*

PFF score: [922]

Protein name: caffeic acid 3-O-methyltransferase

Matched peptides No.: [9] Sequence coverage %: [42]

Matched sequences: R.LYAPGICK.F;

K.NPEAPVLLDR.M;  
R.TRQEFALASK.S;  
K.WVLHDWDDCLCLK.L;  
R.AYGMNQFEYPGTDQR.F + Oxidation (M);  
K.SWYHLNEAILEGGTPFNR.A;  
K.VIVVESILPTVPENNVTSQVLHK.E;  
K.SALELNVIDIISTAGNSGASLSAPEIAQR.I;  
K.GINYDLPHVLADAPSYPGVEHVAGDMFK.S + Oxidation (M)

Calculated Mr: 40957

Calculated pI: 5.54

Probability Based Mowse Score:

Ions score is  $-10 \cdot \log(P)$ , where P is the probability that the observed match is a random event. Individual ions scores > 45 indicate identity or extensive homology ( $p < 0.05$ ). Protein scores are derived from ions scores as a non-probabilistic basis for ranking protein hits.

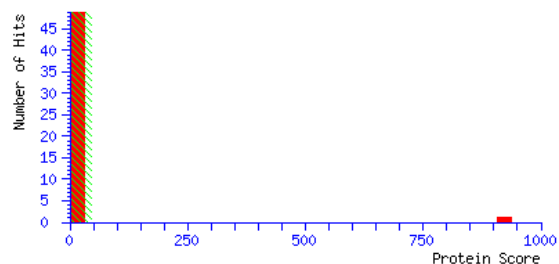

Matched peptide sequences: shown in **Bold Red**:

```
1  MTGSEQNSA  SIMSGRSDEE  TWNLAIDLAN  TVILPMVLKS  ALELNVIDII
51 STAGNSGASL SAPEIAQRIP EAKNPEAPVL LDRMLRLLAT YDIVKCSNT
101 KENGEVERLY APGPICKFLT KNKNGSGSAA PLLLLHHDEV FMKSWYHLNE
151 AILEGGTPFN RAYGMNQFEY PGTDQRFNRV FNDAMSSYTT YLVKKILDAY
201 KGF DGLKSLV  DVGGNSGVTL  NSITSKYPHI  KGINYDLPHV LADAPSYPGV
251 EHVAGDMFKS VPKGDAILLK WVLHDWDDL CLKLLKNCWE ALPSNGKVIV
301 VESILPTVPE NNVTSQVLHK EDLMLLSFNV  GGKERTRQEF  EALASKSGFS
351 SCEFICCAYN  SWVIEFHK
```



Spot No.: 225

NCBI accession No.: gi|255570457 Species: *Ricinus communis*

PFF score: [237]

Protein name: protease C56, putative

Matched peptides No.: [3] Sequence coverage %: [10]

Matched sequences: K.YDGLVIPGGR.A;

R.APEYLALDETVIALVK.Q;

R.APEYLAMNESVLDCVR.K + Oxidation (M)

Calculated Mr: 42437

Calculated pI: 5.60

Probability Based Mowse Score:

Ions score is  $-10 \cdot \log(P)$ , where P is the probability that the observed match is a random event. Individual ions scores  $> 45$  indicate identity or extensive homology ( $p < 0.05$ ). Protein scores are derived from ions scores as a non-probabilistic basis for ranking protein hits.

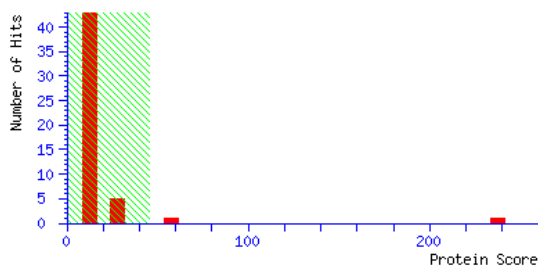

Matched peptide sequences: shown in **Bold Red**:

```
1 MSHQKTVFLL CGDYMEDYEA MVPFQALLAY GVAVDAACPG KKAGDYCRTA
51 IHESSGHQTY SESRGNFTL NSTFDDIDFG KYDGLVIPGG RAPEYLAMNE
101 SVLDCVRKFA DAGKPIASVC HGQLILAAAG LVKGRKCTAY PPVRPVLIAA
151 GAHWVEPETM ASCVADGNLI TGATYEGHPE FIQLFVKALG GSITGADKRI
201 LFLCGDYMED YEVTVPFQSL QALGCHVNAV CPKKKAGDSC PTAVHDFEGD
251 QTYSEKPGHH FTLTASYVGL DVSSYDALVL PGGRRAPEYLA LDETVIALVK
301 QFMQSKKPVA SICHGQQILA AAGVLKGGKC TAYPAVKLNV VLSGATWLEP
351 DPIDRCYTDE NLVTGAAWPG HPEFISQLMA LLGIRVSF
```

Spot No.: 226

NCBI accession No.: gi|224131618 Species: *Populus trichocarpa*

PFF score: [172]

Protein name: predicted protein

Matched peptides No.: [2] Sequence coverage %: [18]

Matched sequences: K.ASGIPYEVHIYPGNAHAFMNR.S + Oxidation (M);

K.APVQAHFGELDNFVGFSDVTAAK.A

Calculated Mr: 26246

Calculated pI: 5.24

Probability Based Mowse Score:

Ions score is  $-10 \cdot \log(P)$ , where P is the probability that the observed match is a random event. Individual ions scores  $> 45$  indicate identity or extensive homology ( $p < 0.05$ ). Protein scores are derived from ions scores as a non-probabilistic basis for ranking protein hits.

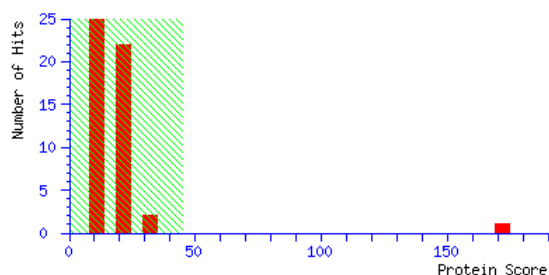

Matched peptide sequences: shown in **Bold Red**:

```
1  MAGSASQPFK  KIQIQRDDTT  FDAYVVGKED  APGIVVLQEW  WGVDFEIKNH
51  AVKISQLGPG  FKALIPDLR  GKVGLDVAEA  QHLMGGLDWQ  GAVKDIQASV
101  NWLKTNGSSK  AGVTGFCMGG  ALSIASSVLV  PEVDAVAFY  GVPSSQLADP
151  AQAKAPVQAH  FGELDNFVGF  SDVTAAKALE  EKLKASGIPY  EVHIYPGNAH
201  AFMNRSPEGV  MRRKGMGLPD  EDEASAELAW  SRFTTWMTRY  LSA
```

Spot No.: 227

NCBI accession No.: gi|333690873 Species: *Hevea brasiliensis*

PFF score: [386]

Protein name: glutathione-S-transferase tau 1

Matched peptides No.: [8] Sequence coverage %: [29]

Matched sequences: R.FWADFIDK.K;

K.VYEFVLVLK.K;

R.FWADFIDKK.I;

K.YEYREEDLR.N;

K.SPFLPSDPYQR.A;

K.SPLLLQMNPNVHK.K + Oxidation (M);

K.DKSPFLPSDPYQR.A;

K.ESVSESVPDPEKVYEFVLVLK.K

Calculated Mr: 25595

Calculated pI: 5.48

Probability Based Mowse Score:

Ions score is  $-10 \cdot \log(P)$ , where P is the probability that the observed match is a random event. Individual ions scores  $> 46$  indicate identity or extensive homology ( $p < 0.05$ ). Protein scores are derived from ions scores as a non-probabilistic basis for ranking protein hits.

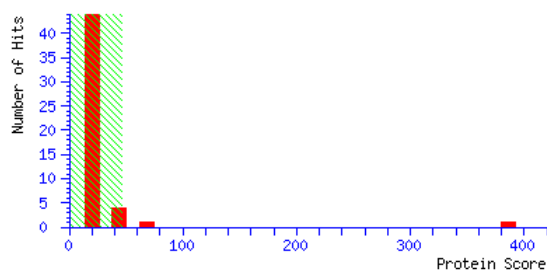

Matched peptide sequences: shown in **Bold Red**:

```
1 MAEEVILLDF WSPSPFGMRVR IALAEKGVKY EYREEDLRNK SPLLLQMNPNV
51 HKKIPVLIHN GKPICESLIA VQYVDEVWKD KSPFLPSDPY QRAQARFWAD
101 FIDKKIYDIG RKIWTTKGDE QEAAKKEFIE ALKLELEGELG NKPYFGGESH
151 GYVDVALIPF YSWFYAYETC GNFSIEPECP VLIAWAKRCL QESVSESVP
201 DPEKVYEFVL VLKKKFGIE
```

Spot No.: 228

NCBI accession No.: gi|211906460 Species: *Gossypium hirsutum*

PFF score: [243]

Protein name: triosephosphate isomerase

Matched peptides No.: [2] Sequence coverage %: [15]

Matched sequences: K.VIACIGETLEQR.E;

K.ELAAQPDVDGFLVGGASLKPEFIDIHK.S

Calculated Mr: 27472

Calculated pl: 6.00

Probability Based Mowse Score:

Ions score is  $-10 \cdot \log(P)$ , where P is the probability that the observed match is a random event. Individual ions scores  $> 45$  indicate identity or extensive homology ( $p < 0.05$ ). Protein scores are derived from ions scores as a non-probabilistic basis for ranking protein hits.

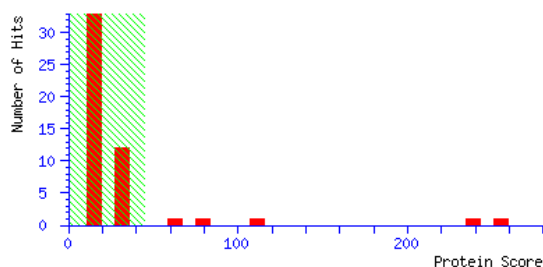

Matched peptide sequences: shown in **Bold Red**:

```
1 MGRKFFVGGN WKCNGTTEEV NKIVSTLNAG EVPSQDVVEV VVSPPFVFLP
51 LVKTSLRPDF HVAAQNCWVK KGGAFTEGEVS AEMLVNLSIP WVIIGHSERR
101 LILKESNEFV ADKVAYALAQ GLKVIACIGE TLEQREAGST VAVVAEQTKA
151 IAAKISNWD VVLAYEPWA IGTGKVATPA QAQEVHCELR KWLQANVSPE
201 VAASTRIIYG GSVTAANCKE LAAQPDVDGF LVGGASLKPE FIDIKSAEV
251 KKNA
```

Spot No.: 229

NCBI accession No.: gi|255568460 Species: *Ricinus communis*

PFF score: [93]

Protein name: glutathione-s-transferase omega, putative

Matched peptides No.: [2] Sequence coverage %: [13]

Matched sequences: K.YDITAGRPK.L;

K.FDDGPFLLGQFSLVDIA YIPFVER.L

Calculated Mr: 27477

Calculated pI: 5.13

Probability Based Mowse Score:

Ions score is  $-10 \cdot \log(P)$ , where P is the probability that the observed match is a random event. Individual ions scores  $> 45$  indicate identity or extensive homology ( $p < 0.05$ ). Protein scores are derived from ions scores as a non-probabilistic basis for ranking protein hits.

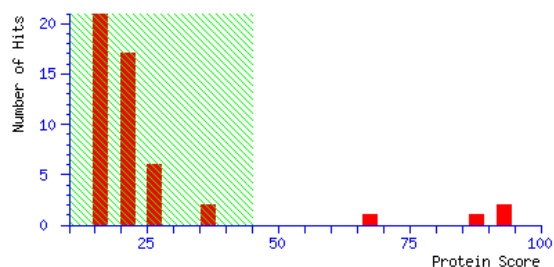

Matched peptide sequences: shown in **Bold Red**:

```
1 MAAATALDKS AQENLPPILD AAADQPPLFD GTIRLYTAYA CPFAQRVWIT
51 RNYKGLQDSI KLVPLNLQNR PSWYPEKVYS VNKVPALEHN GKIIGESLDL
101 IKYVDSNFEG PSLFPDDPAK REFAEELFSY TDTFSRTVFT SFKGDVAKEA
151 GPAFDYLENA LQKFDDGPFL LGQFSLVDIA YIPFVERLEI FLSEVFKYDI
201 TAGRPKLAAW VGEVNKIGAY KQTKTDPKEL VEYYKKRFFA QQ
```

Spot No.: 230

NCBI accession No.: gi|2970051 Species: *Vigna radiata*

PFF score: [104]

Protein name: ARG10

Matched peptides No.: [2] Sequence coverage %: [12]

Matched sequences: K.SANEVILVIEAYK.A;

K.ITAVPAEEEEIIWGATFK.V

Calculated Mr: 25750

Calculated pI: 5.62

Probability Based Mowse Score:

Ions score is  $-10 \cdot \log(P)$ , where P is the probability that the observed match is a random event. Individual ions scores  $> 46$  indicate identity or extensive homology ( $p < 0.05$ ). Protein scores are derived from ions scores as a non-probabilistic basis for ranking protein hits.

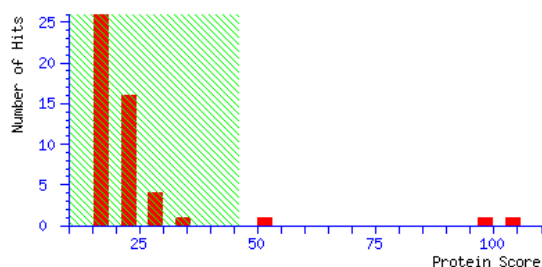

Matched peptide sequences: shown in **Bold Red**:

```
1  MLGIFSSSVV  SPPEELVAAG  SRTSPKTTA  GKLLTRFVES  KASAVSLQVG
51  EHVQLAYTHH  SESPWYPRSF  AVKDEIFCLF  EGALDNLGSL  RQQYGLAKSA
101 NEVILVIEAY  KALRDRAPYP  ANRVVCHLSG  SFAFIVFDKS  TSTVAVASDQ
151  AGKVPLYWGI  TADGYVAFAD  DADLLKGSCG  KSLASFPQGC  FYSTAVGGLR
201  CYENPKNKIT  AVPAEEEEIIW  GATFKVEGSA  VLAATEY
```

Spot No.: 231

NCBI accession No.: gi|2832430

Species: *Hevea brasiliensis*

PFF score: [217]

Protein name: prohevein

Matched peptides No.: [2]

Sequence coverage %: [20]

Matched sequences: R.IVDQCSNGGLDLVNVFR.Q;

K.YGWTAFCGPVGAHGQPSCGK.C

Calculated Mr: 20852

Calculated pI: 5.64

### Probability Based Mowse Score:

Ions score is  $-10 \cdot \log(P)$ , where P is the probability that the observed match is a random event. Individual ions scores  $> 45$  indicate identity or extensive homology ( $p < 0.05$ ). Protein scores are derived from ions scores as a non-probabilistic basis for ranking protein hits.

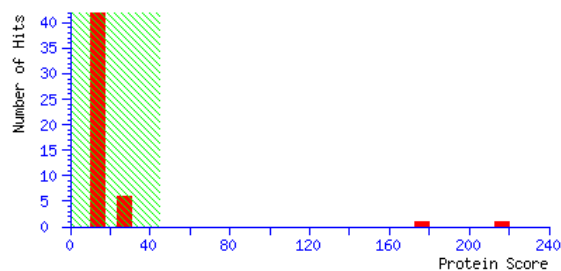

Matched peptide sequences: shown in **Bold Red**:

```
1  EQCGRQAGGK LCPNNLCCSQ WGWCGSTDEY CSPDHNCQSN CKDSGEGVGG
51  GSASNVLATY HLYNSQDHGW DLNAAAYCS TWDANKPYSW RSKYGWTAFC
101 GPVGAHGQPS CGKCLSVTNT GTGAKATVRI VDQCSNGGLD LDVNVFRQLD
151  TDGKGYERGH LTVNYQFVDC GDSFNPLFSV MKSSVIN
```

Spot No.: 232

NCBI accession No.: gi|2832430

Species: *Hevea brasiliensis*

PFF score: [112]

Protein name: prohevein

Matched peptides No.: [2]

Sequence coverage %: [16]

Matched sequences: R.QLDTDGKGYER.G;

K.YGWTAFCGPVGHAHGQPSCGK.C

Calculated Mr: 20852

Calculated pI: 5.64

Probability Based Mowse Score:

Ions score is  $-10 \cdot \log(P)$ , where P is the probability that the observed match is a random event. Individual ions scores > 45 indicate identity or extensive homology ( $p < 0.05$ ). Protein scores are derived from ions scores as a non-probabilistic basis for ranking protein hits.

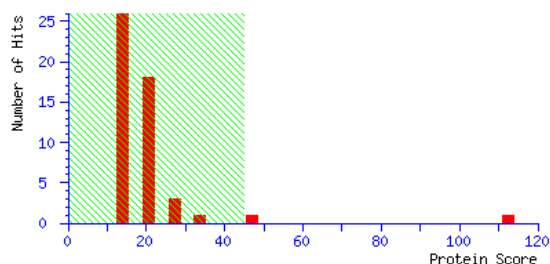

Matched peptide sequences: shown in **Bold Red**:

```
1 EQCGRQAGGK LCPNNLCCSQ WGWCGSTDEY CSPDHNCQSN CKDSGEGVGG
51 GSASNVLATY HLYNSQDHGW DLNAASAYCS TWDANKPYSW RSKYGWTAFC
101 GPVGAHGQPS CGKCLSVTNT GTGAKATVRI VDQCSNGGLD LDVNVFRQLD
151 TDGKGYERGH LTVNYQFVDC GDSFNPLFSV MKSSVIN
```



Spot No.: 233

NCBI accession No.: gi|14423933

Species: *Hevea brasiliensis*

PFF score: [384]

Protein name: Small rubber particle protein

Matched peptides No.: [5]

Sequence coverage %: [36]

Matched sequences: K.AEQYAVITWR.A;

R.VSSYLPLLPEK.I;

K.QVSAQTYVAQDAPR.I;

K.DISGPLKPGVDTIENVVK.T;

R.IVLDVASSVNTGVQEGAK.A

Calculated Mr: 22331

Calculated pI: 4.80

Probability Based Mowse Score:

Ions score is  $-10 \cdot \log(P)$ , where P is the probability that the observed match is a random event. Individual ions scores  $> 45$  indicate identity or extensive homology ( $p < 0.05$ ). Protein scores are derived from ions scores as a non-probabilistic basis for ranking protein hits.

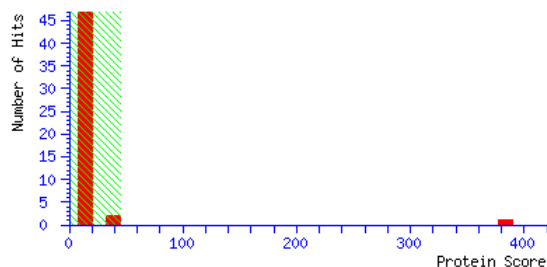

Matched peptide sequences: shown in **Bold Red**:

```
1 MAEEVEEERL KYLDFVRAAG VYAVDSFSTL YLYAKDISGP LKPGVDTIEN
51 VVKIVVTPVY YIPLEAVKFV DKTVDVSVTS LDGVVPPVIK QVSAQTYVA
101 QDAPRIVLDV ASSVNTGVQ EGAKALYANL EPKAEQYAVI TWRALNKLPL
151 VPQVANVVVP TAVYFSEKYN DVVRGTTTEQG YRVSSYLPLL PTEKITKVFG
201 DEAS
```

Spot No.: 234

NCBI accession No.: gi|132270

Species: *Hevea brasiliensis*

PFF score: [379]

Protein name: Rubber elongation factor protein

Matched peptides No.: [4]

Sequence coverage %: [38]

Matched sequences: K.NVAVPLYNR.F;

K.DASIQVVS AIR.A;

K.FVDSTVVASVTIHDR.S;

K.DKSGPLQPGVDIIEGPVK.N

Calculated Mr: 14713

Calculated pI: 5.04

Probability Based Mowse Score:

Ions score is  $-10 \cdot \log(P)$ , where P is the probability that the observed match is a random event. Individual ions scores  $> 45$  indicate identity or extensive homology ( $p < 0.05$ ). Protein scores are derived from ions scores as a non-probabilistic basis for ranking protein hits.

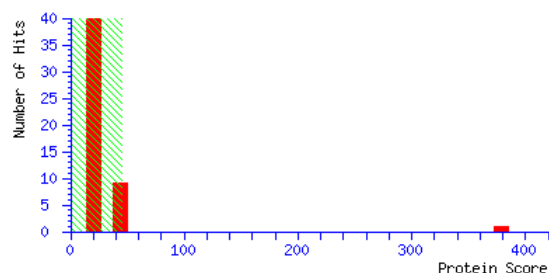

Matched peptide sequences: shown in **Bold Red**:

```
1 MAEDEDNQGG QGEGCLKYLG F VQDAATYAVT TFSNVYLFAK DKSGPLQPGV
51 DIIEGPVKNV AVPLYNRFSY IPNGALKFVD STVVASVTII DRSLPPIVKD
101 ASIQVVS AIR AAPEAARSLA SSLPGQTKIL AKVFGYEN
```

Spot No.: 235

NCBI accession No.: gi|123550 Species: *Pisum sativum*

PFF score: [128]

Protein name: 17.1 kDa class II heat shock protein

Matched peptides No.: [1] Sequence coverage %: [9]

Matched sequences: K.VQVEDENVLLISGER.K

Calculated Mr: 17059

Calculated pI: 6.32

### Probability Based Mowse Score:

Ions score is  $-10 \cdot \log(P)$ , where P is the probability that the observed match is a random event. Individual ions scores  $> 45$  indicate identity or extensive homology ( $p < 0.05$ ). Protein scores are derived from ions scores as a non-probabilistic basis for ranking protein hits.

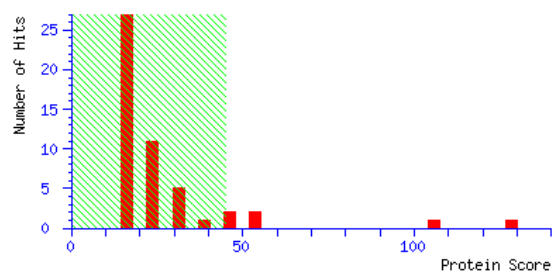

Matched peptide sequences: shown in **Bold Red**:

```
1 MDLDSPLFNT LHHIMDLTDD TTEKLNAPT RTYVRDAKAM AATPADVKEH
51 PNSYVFMVDM PGVKSGDIK VQVEDENVLLI SGERKREEEK EGVKYLKMER
101 RIGKLMRKFV LPENANIEAI SAISQDGVLT VTVNKLPPPE PKKPKTIQVK
151 VA
```

Spot No.: 236

NCBI accession No.: gi|312985293

Species: *Hevea brasiliensis*

PFF score: [272]

Protein name: nucleoside diphosphate kinase 2

Matched peptides No.: [5]

Sequence coverage %: [27]

Matched sequences: K.LMSVERPFAEK.H;

K.LMSVERPFAEK.H + Oxidation (M);

R.NVIHGSDSVENAK.K;

R.NVIHGSDSVENAKK.E;

K.IIGATKPSESDPGTIR.G

Calculated Mr: 16463

Calculated pI: 5.96

Probability Based Mowse Score:

Ions score is  $-10 \cdot \log(P)$ , where P is the probability that the observed match is a random event. Individual ions scores  $> 45$  indicate identity or extensive homology ( $p < 0.05$ ). Protein scores are derived from ions scores as a non-probabilistic basis for ranking protein hits.

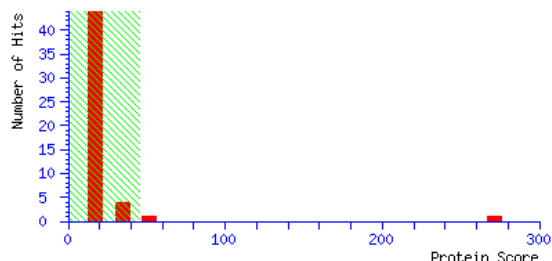

Matched peptide sequences: shown in **Bold Red**:

```
1  MEQTFIMIKP  DGVQRGLVGE  IISRFEEKGF  SLKGLKMSV  ERPFAEKHYE
51  ELSSKPFPEG  LVDYIISGPV  AAMVWEGKNV  VATGRKIIGA  TKPSESDPGT
101 IRGDFAVEVG RNVIHGSDSV ENAKKEIALW  FPDGTVNWQS  SLHSWIYE
```

Spot No.: 237

NCBI accession No.: gi|132270

Species: *Hevea brasiliensis*

PFF score: [90]

Protein name: Rubber elongation factor protein

Matched peptides No.: [2]

Sequence coverage %: [23]

Matched sequences: K.FVDSTVVASVTIIDR.S;

K.DKSGPLQPGVDIIEGPVK.N

Calculated Mr: 14713

Calculated pI: 5.04

Probability Based Mowse Score:

Ions score is  $-10 \cdot \log(P)$ , where P is the probability that the observed match is a random event. Individual ions scores  $> 45$  indicate identity or extensive homology ( $p < 0.05$ ). Protein scores are derived from ions scores as a non-probabilistic basis for ranking protein hits.

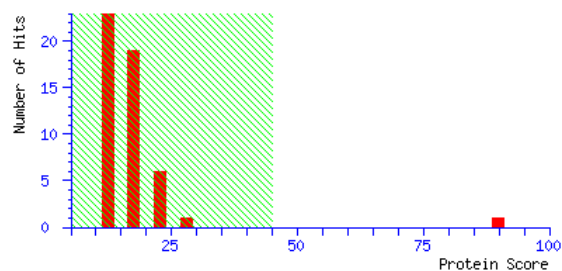

Matched peptide sequences: shown in **Bold Red**:

```
1 MAEDEDNQQG QGEGCLKYLG FVQDAATYAVT TFSNVYLFAK DKSGPLQPGV
51 DIIEGPVKNV AVPLYNRFSY IPNGALKFVD STVVASVTII DRSLPPIVKD
101 ASIQVVS AIR APEAARSLA SSLPGQTKIL AKV FYGEN
```

Spot No.: 238

NCBI accession No.: gi|2832430

Species: *Hevea brasiliensis*

PFF score: [344]

Protein name: prohevein

Matched peptides No.: [3]

Sequence coverage %: [26]

Matched sequences: R.QLDTDGKGYER.G;

R.IVDQCSNGGLDLVDNVFR.Q;

K.YGWTAFCGPVGAHGQPSGK.C

Calculated Mr: 20852

Calculated pI: 5.64

### Probability Based Mowse Score:

Ions score is  $-10 \cdot \log(P)$ , where P is the probability that the observed match is a random event. Individual ions scores  $> 45$  indicate identity or extensive homology ( $p < 0.05$ ). Protein scores are derived from ions scores as a non-probabilistic basis for ranking protein hits.

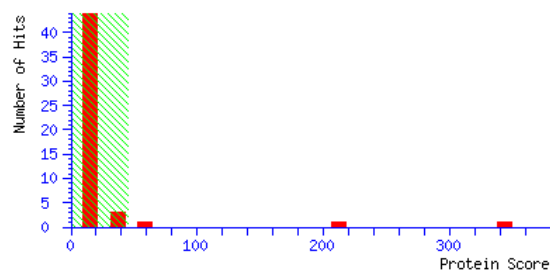

Matched peptide sequences: shown in **Bold Red**:

```
1  EQCGRQAGGK LCPNNLCCSQ  WGWCGSTDEY  CSPDHNCQSN  CKDSGEGVGG
51  GSASNVLATY HLYNSQDHGW  DLNAASAYCS  TWDANKPYSW  RSKYYGWTAFC
101 GPVGAHGQPS CGKCLSVTNT  GTGAKATVRI  VDQCSNGGLD  LDVNVFRQLD
151 TDGKGYERGH  LTVNYQFVDC  GDSFNPLFSV  MKSSVIN
```

Spot No.: 239

NCBI accession No.: gi|255570457

Species: *Ricinus communis*

PFF score: [193]

Protein name: protease C56, putative

Matched peptides No.: [2]

Sequence coverage %: [8]

Matched sequences: R.APEYLALDETVIALVK.E;

R.APEYLAMNESVLDCVR.K + Oxidation (M)

Calculated Mr: 42437

Calculated pI: 5.60

Probability Based Mowse Score:

Ions score is  $-10 \cdot \log(P)$ , where P is the probability that the observed match is a random event. Individual ions scores  $> 45$  indicate identity or extensive homology ( $p < 0.05$ ). Protein scores are derived from ions scores as a non-probabilistic basis for ranking protein hits.

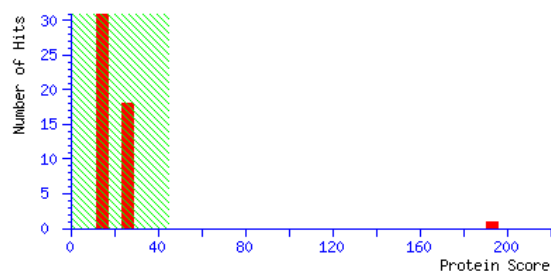

Matched peptide sequences: shown in **Bold Red**:

```
1  MSHQKTVFLL  CGDYMEDYEA  MVPFQALLAY  GVAVDAACPG  KKAGDYCRTA
51  IHESGHQTY   SESRGNFTL   NSTFDDIDFG  KYDGLVIPGG  RAPEYLAMNE
101 SVLDCVRKFA  DAGKPIASVC  HGQLILAAAG  LVKGRKCTAY  PPVRPVLIAA
151  GAHWVEPETM  ASCVADGNLI  TGATYEGHPE  FIQLFVKALG  GSITGADKRI
201  LFLCGDYMED  YEVTVPFQSL  QALGCHVNAV  CPKKKAGDSC  PTAVHDFEGD
251  QTYSEKPGHH  FTLTASYVGL  DVSSYDALVL  PGGRRAPEYLA  LDETVIALVK
301  QFMQSKKPVA  SICHGQQILA  AAGVLKGGKC  TAYPAVKLNV  VLSGATWLEP
351  DPIDRCYTDE  NLVTGAAWPG  HPEFISQLMA  LLGIRVSF
```

Spot No.: 240

NCBI accession No.: gi|727357

Species: *Arabidopsis thaliana*

PFF score: [58]

Protein name: DnaJ homolog

Matched peptides No.: [2]

Sequence coverage %: [6]

Matched sequences: R.EIYDQYGEDALK.E;

K.ELAQAQAYEVLSDPEKRE

Calculated Mr: 47042

Calculated pI: 5.68

Probability Based Mowse Score:

Ions score is  $-10 \cdot \log(P)$ , where P is the probability that the observed match is a random event. Individual ions scores  $> 45$  indicate identity or extensive homology ( $p < 0.05$ ). Protein scores are derived from ions scores as a non-probabilistic basis for ranking protein hits.

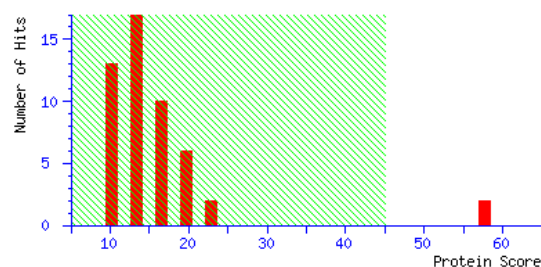

Matched peptide sequences: shown in **Bold Red**:

```
1 MFGRGSPSKKS DNTKFEIILG VPKSASPEDL KKAYKKAIAIK NHPDKGGDPE
51 KFKELAQAQAYE VLSDPEKREI YDQYGEDALK EGMGGGGGGH DPFDFSSFF
101 GGGPFGGNTS RQRRQRRGED VVHPLKVSLE DVYLGTMKKL SLSRNALCSK
151 CNGKGSKSGA SLKCGGCQGS GMKVSIRQLG PGMIQQMQHA CNECKGTGET
201 INDRDRCPQC KGDKVIPEKK VLEVNVEKGM QHSQKITFEG QADEAPDITV
251 GDIVFVLQOK EHPQFKRKGE DLFVEHTLSL TEALCGFQFV LTHLDGRSLL
301 IKSNPGEVVK PDSYKAISDE GMPIYQRPFM KGKLYIHFTV EFPDSLSPDQ
351 TKALEAVLPK PSTAQLSDME IDECEETTLH DVNIEDEMRR KAQAQREAYD
401 DDEDDDDHPG GAQRVQCAQQ
```



Spot No.: 241

NCBI accession No.: gi|255568794 Species: *Ricinus communis*

PFF score: [100]

Protein name: nucleoredoxin, putative

Matched peptides No.: [3] Sequence coverage %: [5]

Matched sequences: K.LIEAYHEIK.A;  
K.KCDFDLHPK.C;  
R.VEYFRQEEENAK.K

Calculated Mr: 63728

Calculated pI: 5.46

### Probability Based Mowse Score:

Ions score is  $-10 \cdot \log(P)$ , where P is the probability that the observed match is a random event. Individual ions scores  $> 45$  indicate identity or extensive homology ( $p < 0.05$ ). Protein scores are derived from ions scores as a non-probabilistic basis for ranking protein hits.

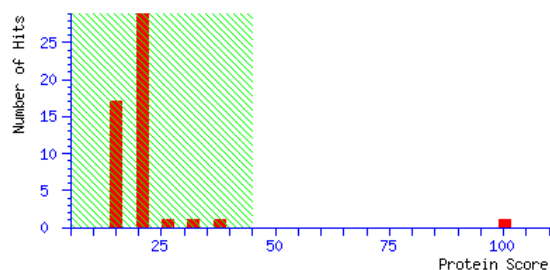

Matched peptide sequences: shown in **Bold Red**:

```
1 MADDPVIDVS HDLLSLLSSD DRDFLIRSNG DQVKISNLVG KIVGLYFSGS
51 WCGPCRHFTP NLVQVYEELS LKGDFFVVFV SDRDAESFD AYFSKMPWLA
101 IPFSDQETCK HLKDLFKVRG IPNLVFLDAD GKVSCDQGVR FIREYGAEGY
151 PFTPERVEYF RQEEENAKKN QTLSSILVSS SRDFLISKDG TKIPVSELEG
201 KMGVLYFSVH SHRLCLDFTP RLEEVYKKLK EKGEKFEVVL ISMDYDENNF
251 KQGLETMPWL ALPFEDKSRE RLARYFELSA LPTLVIIGED GKTLNKNVAE
301 LIEGHGIQAY PFTPEKLVEL AEIEKARLEA QTLESVLVHG DKDFVIEESG
351 SKVPVSELVG KNILLYFSAK WCPPCRAFLP KLIEAYHEIK AKDNAFEIIF
401 ISSDRDQSSF DEFYTEMPWL ALPFGDDRKT ILQRKFKIKG IPAAIAISPT
451 GKILTKEARE HITAYGADAY PFNEDHLKQL NDKQEEIAKG WPEKVRHELH
501 PEHELVRMKR NGYGCDGCKE AGSGWSFYCK KCDFDLHPKC ALKKEENGEK
551 VKK
```

Spot No.: **242**

NCBI accession No.: **gi|37719658** Species: *Hevea brasiliensis*

Protein name: **50 kDa protein**

Mascot score: **93**

Sequence coverage %: **31**

Matched peptides No.: **9**

Total peptides No.: **33**

Calculated Mr: **41480**

Calculated pI: **4.60**

Probability Based Mowse Score:

Protein score is  $-10 \cdot \log(P)$ , where P is the probability that the observed match is a random event. Protein scores greater than 73 are significant ( $p < 0.05$ ).

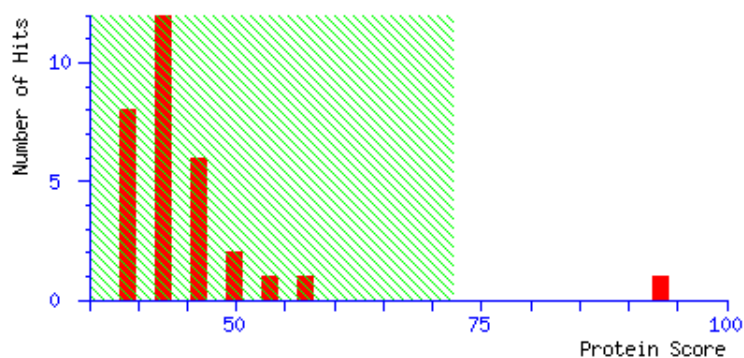

Matched peptide sequences: shown in **Bold Red**:

```
1 MASLAYSLEFI LSLFTFTLLN PVCSELDEYL FSFGDGLYDA GNAKFIYPDK
51 YLPSYHHPYG TTFDYPYPTGR FSDGRTVVDF VAENVSLPRI PPFKNKEANF
101 TYGANFASEG ATASDSNPLI DFRSQIRDFG ELKLEWAVQL VNVTELARRL
151 KKAVYLISFG ADDYLNYEIP SEASREQLES IVDVVLGNIS DRIKELYDFG
201 ARKFVVENVA PLGLIPFIKQ TSDNSTLFYE LASLHAMKLP QILEKIQDGY
251 LFPEFNITVF NYFGIIEII DAPGEHGFKY GDIACCGNST YRGQACGFLD
301 YEFVCVGNKT EYLFFDGTHN TDAANLLAE LMWDKESGFI SPYGVKDFFP
351 SPTTIQTLLT EATALG
```

Spot No.: **243**

NCBI accession No.: **gi|37719658** Species: *Hevea brasiliensis*

Protein name: **50 kDa protein**

Mascot score: **93**

Sequence coverage %: **36**

Matched peptides No.: **11**

Total peptides No.: **44**

Calculated Mr: **41480**

Calculated pI: **4.60**

Probability Based Mowse Score:

Protein score is  $-10 \cdot \log(P)$ , where P is the probability that the observed match is a random event. Protein scores greater than 73 are significant ( $p < 0.05$ ).

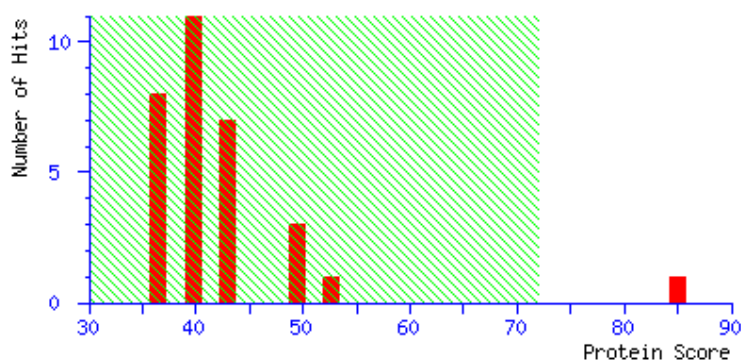

Matched peptide sequences: shown in **Bold Red**:

```
1 MASLAYSLEFI LSLFTFTLLN PVCSELDEYL FSFGDGLYDA GNAKFIYPDK
51 YLPSYHHPYG TTFFDYPTGR FSDGRTVVDF VAENVSLPRI PPFKNKEANF
101 TYGANFASEG ATASDSNPLI DFRSQIRDFG ELKLEWAVQL VNVTELARRL
151 KKAVYLISFG ADDYLNIEIP SEASREQLES IVDVVLGNIS DRIKELYDFG
201 ARKFVVENVA PLGLIPFIKQ TSDNSTLFYE LASLHAMKLP QILEKIQDGY
251 LFPEFNYTVF NYFGIIEII DAPGEHGFKY GDIACCGNST YRGQACGFLD
301 YEFVCVGNKT EYLFFDGTHN TDAANLLAE LMWDKESGFI SPYGVKDFFP
351 SPTTIQTLT EATALG
```

Spot No.: **244**

NCBI accession No.: **gi|37719658** Species: *Hevea brasiliensis*

Protein name: **50 kDa protein**

Mascot score: **95**

Sequence coverage %: **42**

Matched peptides No.: **14**

Total peptides No.: **66**

Calculated Mr: **41480**

Calculated pI: **4.60**

Probability Based Mowse Score:

Protein score is  $-10 \cdot \log(P)$ , where P is the probability that the observed match is a random event. Protein scores greater than 73 are significant ( $p < 0.05$ ).

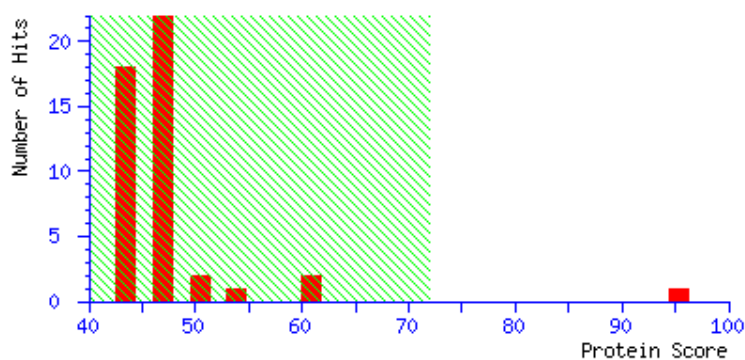

Matched peptide sequences: shown in **Bold Red**:

```
1 MASLAYSLEFI LSLFTFTLLN PVCSELDEYL FSFGDGLYDA GNAKFIYPDK
51 YLPSYHHPYG TTFDYPTGR FSDGRTVVDF VAENVSLPRI PPFKNKEANF
101 TYGANFASEG ATASDSNPLI DFRSQIRDFG ELKLEWAVQL VNVTELARRL
151 KKAVYLISFG ADDYLYEIP SEASREQLES IVDVVLGNIS DRIKELYDFG
201 ARKEVVENVA PLGLIPFIKQ TSDNSTLFYE LASLHAMKLP QILEKIQDGY
251 LFPEFNITVF NYFGIIEII DAPGEHGFKY GDIACCGNST YRGQACGFLD
301 YEFVCVGNKT EYLFFDGTHN TDAANLLAE LMWDKESGFI SPYGVKDFFP
351 SPTTIQTLT EATALG
```

Spot No.: **245**

NCBI accession No.: **gi|37719658** Species: *Hevea brasiliensis*

Protein name: **50 kDa protein**

Mascot score: **101**

Sequence coverage %: **49**

Matched peptides No.: **16**

Total peptides No.: **67**

Calculated Mr: **41480**

Calculated pI: **4.60**

Probability Based Mowse Score:

Protein score is  $-10 \cdot \log(P)$ , where P is the probability that the observed match is a random event. Protein scores greater than 73 are significant ( $p < 0.05$ ).

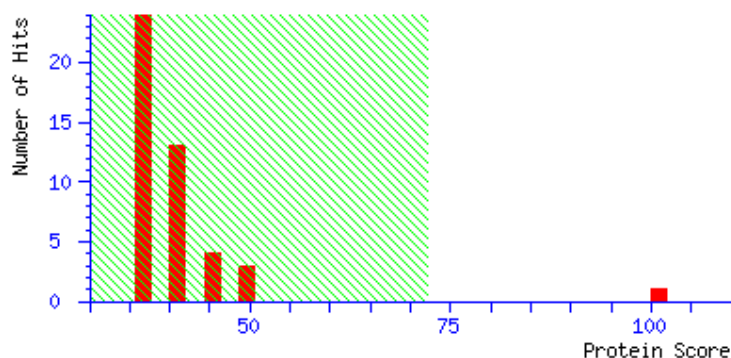

Matched peptide sequences: shown in **Bold Red**:

```
1 MASLAYSLEFI LSLFTFTLLN PVCSELDEYL FSFGDGLYDA GNAKFIYPDK
51 YLPSYHHPYG TTFDYPTGR FSDGRTVVDF VAENVSLPRI PPFKNKEANF
101 TYGANFASEG ATASDSNPLI DFRSQIRDFG ELKLEWAVQL VNVTELARRL
151 KKAVYLISFG ADDYLNIEIP SEASREQLES IVDVVLGNIS DRIKELYDFG
201 ARKFVVENVA PLGLIPFIKQ TSDNSTLFYE LASLHAMKLP QILEKIQDGY
251 LFPEFNITVF NYFGIIKEII DAPGEHGFRY GDIACCGNST YRGQACGFLD
301 YEFVCVGNKT EYLFFDGTHN TDAANLLAE LMWDKESGFI SPYGVKDFFP
351 SPTTIQTLT EATALG
```

Spot No.: **246**

NCBI accession No.: **gi|37719658** Species: *Hevea brasiliensis*

Protein name: **50 kDa protein**

Mascot score: **118**

Sequence coverage %: **47**

Matched peptides No.: **15**

Total peptides No.: **46**

Calculated Mr: **41480**

Calculated pI: **4.60**

Probability Based Mowse Score:

Protein score is  $-10 \cdot \log(P)$ , where P is the probability that the observed match is a random event. Protein scores greater than 73 are significant ( $p < 0.05$ ).

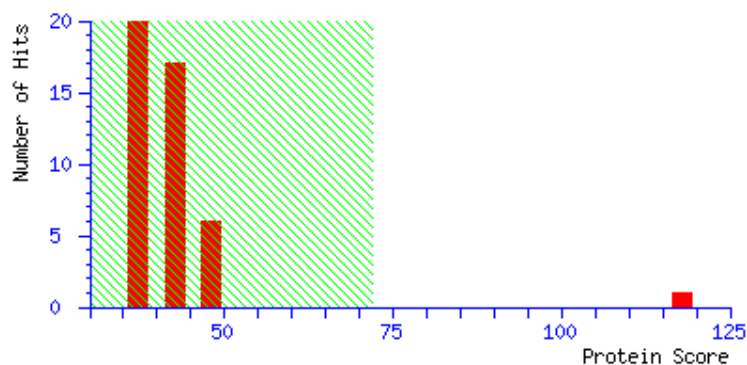

Matched peptide sequences: shown in **Bold Red**:

```
1 MASLAYSLEFI LSLFTFTLLN PVCSELDEYL FSFGDGLYDA GNAKFIYPDK
51 YLPSYHHPYG TTFFDYPTGR FSDGRTVVDF VAENVSLPRI PPFKNKEANF
101 TYGANFASEG ATASDSNPLI DFRSQIRDFG ELKLEWAVQL VNVTELARRL
151 KKAVYLISFG ADDYLNVEIP SEASREQLES IVDVVLGNIS DRIKELYDFG
201 ARKFVVENVA PLGLIPFIKQ TSDNSTLFYE LASLHAMKLP QILEKIQDGY
251 LFPFNYTVF NYFGIIKELI DAPGEHGFKY GDIACCGNST YRGQACGFLD
301 YEFCVCGNKT EYLFFDGTHN TDAANNLLAE LMWDKESGFI SPYGVKDFFP
351 SPTTIQTLT EATALG
```

Spot No.: **247**

NCBI accession No.: **gi|123062** Species: *Hevea brasiliensis*

**PFF** score: **[158]**

Protein name: **Pro-hevein**

Matched peptides No.: **[2]** Sequence coverage %: **[11]**

Matched sequences: **K.CLSVTNTGTGAK.T;**  
**R.QLDTDGKGYER.G**

Calculated Mr: **22700**

Calculated pI: **5.63**

### Probability Based Mowse Score:

Ions score is  $-10 \cdot \log(P)$ , where P is the probability that the observed match is a random event. Individual ions scores  $> 45$  indicate identity or extensive homology ( $p < 0.05$ ). Protein scores are derived from ions scores as a non-probabilistic basis for ranking protein hits.

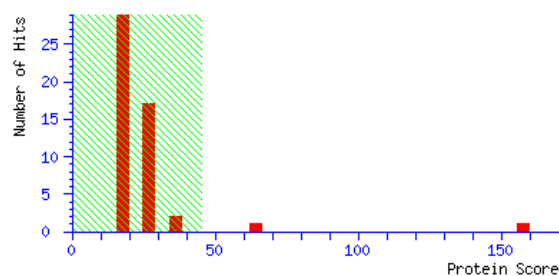

Matched peptide sequences: shown in **Bold Red**:

```
1 MNIFIVVLLC LTGVAIAEQC GRQAGGKLCF NNLCCSQWGW CGSTDEYCSP
51 DHNCQSNCKD SGEGVGGGSA SNVLATYHLY NSQDHGWDLN AASAYCSTWD
101 ANKPYSWRSK YGWTAFCGPV GAHGQSSCGK CLSVTNTGTG AKTTVRIVDQ
151 CSNGGLDLDV NVERQLDTDG KGYERGHITV NYQFVDCGDS FNPLFSVMKS
201 SVIN
```

Spot No.: **248**

NCBI accession No.: **gi|2832430** Species: *Hevea brasiliensis*

**PFF** score: **[446]** Protein name: **prohevein**

Matched peptides No.: **[4]** Sequence coverage %: **[32]**

Matched sequences: **K.CLSVTNTGTGAK.A;**

**R.QLDTDGKGYER.G;**

**R.IVDQCSNGGLDLVDNVFR.Q;**

**K.YGWTAFCGPVGAGHQPCGK.C**

Calculated Mr: **20852**

Calculated pI: **5.64**

### Probability Based Mowse Score:

Ions score is  $-10 \cdot \log(P)$ , where P is the probability that the observed match is a random event. Individual ions scores  $> 46$  indicate identity or extensive homology ( $p < 0.05$ ). Protein scores are derived from ions scores as a non-probabilistic basis for ranking protein hits.

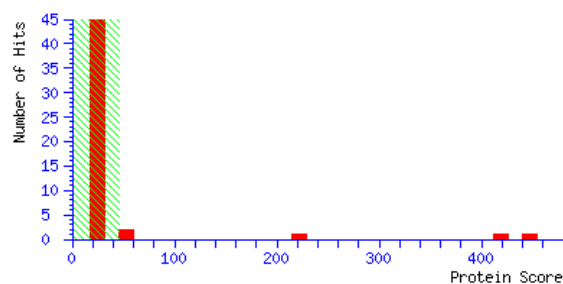

Matched peptide sequences: shown in **Bold Red**:

```
1  EQCGRQAGGK LCPNNLCCSQ WGWCGSTDEY CSPDHNCQSN CKDSGEGVGG
51  GSASNVLATY HLYNSQDHGW DLNAASAYCS TWDANKPYSW RSKYGWTAFC
101 GPVGAHQPS CGRCLSVTNT GTGAKATVRI VDQCSNGGLD LDVNVFRQLD
151 TDGKGYERGH LTVNYQFVDC GDSFNPLFSV MKSSVIN
```



Spot No.: **249**

NCBI accession No.: **gi|132270** Species: *Hevea brasiliensis*

**PFF** score: **[405]**

Protein name: **Rubber elongation factor protein**

Matched peptides No.: **[4]** Sequence coverage %: **[38]**

Matched sequences: **K.NVAVPLYNR.F;**

**K.DASIQVVS AIR.A;**

**K.FVDSTVVASVTI DR.S;**

**K.DKSGPLQPGVDIIEGPVK.N**

Calculated Mr: **14713**

Calculated pI: **5.04**

Probability Based Mowse Score:

Ions score is  $-10 \cdot \log(P)$ , where P is the probability that the observed match is a random event. Individual ions scores  $> 46$  indicate identity or extensive homology ( $p < 0.05$ ). Protein scores are derived from ions scores as a non-probabilistic basis for ranking protein hits.

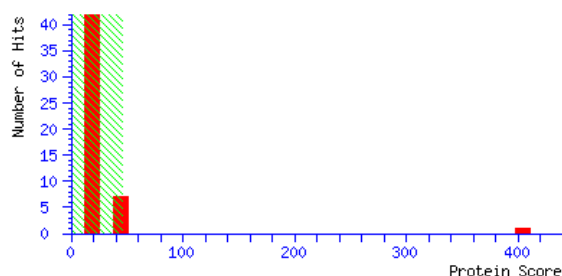

Matched peptide sequences: shown in **Bold Red**:

```
1 MAEDEDNQGG QEGGLKYLGF VQDAATYAVT TFSNVYLF AK DKSGPLQPGV
51 DIIEGPVKNV AVPLYNRFSY IPNGALKFVD STVVASVTII DRSLPPIVKD
101 ASIQVVS AIR AAPEAARSLA SSLPGQTKIL AKVIFYGEN
```

Spot No.: **250**

NCBI accession No.: **gi|132270** Species: *Hevea brasiliensis*

**PFF** score: **[340]**

Protein name: **Rubber elongation factor protein**

Matched peptides No.: **[4]** Sequence coverage %: **[38]**

Matched sequences: **K.NVAVPLYNR.F;**

**K.DASIQVVS AIR.A;**

**K.FVDSTVVASVTI DR.S;**

**K.DKSGPLQPGVDIIEGPVK.N**

Calculated Mr: **14713**

Calculated pI: **5.04**

Probability Based Mowse Score:

Ions score is  $-10 \cdot \log(P)$ , where P is the probability that the observed match is a random event. Individual ions scores  $> 46$  indicate identity or extensive homology ( $p < 0.05$ ). Protein scores are derived from ions scores as a non-probabilistic basis for ranking protein hits.

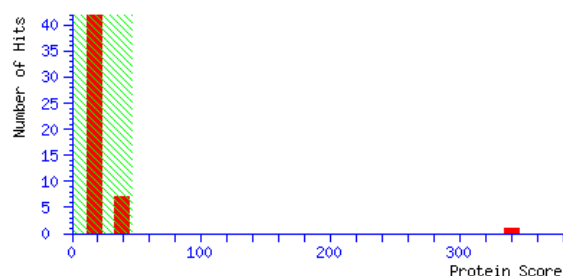

Matched peptide sequences: shown in **Bold Red**:

```
1 MAEDEDNQGG QGEGLYLGF VQDAATYAVT TFSNVYLF AK DKSGPLQPGV
51 DIIEGPVKNV AVPLYNRF SY IPNGALKFVD STVVASVTII DRSLPPIVKD
101 ASIQVVS AIR AAPEAARSLA SSLPGQTKIL AKVFGYEN
```

Spot No.: **251**

NCBI accession No.: **gi|132270** Species: *Hevea brasiliensis*

**PFF** score: **[470]**

Protein name: **Rubber elongation factor protein**

Matched peptides No.: **[4]** Sequence coverage %: **[27]**

Matched sequences: **K.NVAVPLYNR.F;**

**K.DASIQVVS AIR.A;**

**K.SGPLQPGVDIIEGPVK.N;**

**K.DKSGPLQPGVDIIEGPVK.N**

Calculated Mr: **14713**

Calculated pI: **5.04**

Probability Based Mowse Score:

Ions score is  $-10 \cdot \log(P)$ , where P is the probability that the observed match is a random event. Individual ions scores  $> 46$  indicate identity or extensive homology ( $p < 0.05$ ). Protein scores are derived from ions scores as a non-probabilistic basis for ranking protein hits.

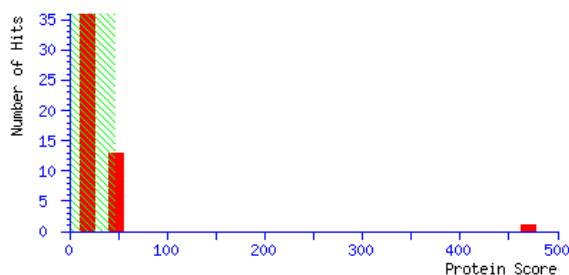

Matched peptide sequences: shown in **Bold Red**:

```
1 MAEDEDNQGG QGEGCLKYLGF VQDAATYAVI TFSNVYLFAK DKSGPLQPGV
51 DIIEGPVKNV AVPLYNRFSY IPNGALKFVD STVVASVTII DRSLPPIVKD
101 ASIQVVS AIR AAPEAARSLA SSLPGQTKIL AKVIFYGEN
```

Spot No.: **252**

NCBI accession No.: **gi|132270** Species: *Hevea brasiliensis*

**PFF** score: **[402]**

Protein name: **Rubber elongation factor protein**

Matched peptides No.: **[4]** Sequence coverage %: **[38]**

Matched sequences: **K.NVAVPLYNR.F;**

**K.DASIQVVS AIR.A;**

**K.FVDSTVVASVTI DR.S;**

**K.DKSGPLQPGVDIIEGPVK.N**

Calculated Mr: **14713**

Calculated pI: **5.04**

Probability Based Mowse Score:

Ions score is  $-10 \cdot \log(P)$ , where P is the probability that the observed match is a random event. Individual ions scores  $> 46$  indicate identity or extensive homology ( $p < 0.05$ ). Protein scores are derived from ions scores as a non-probabilistic basis for ranking protein hits.

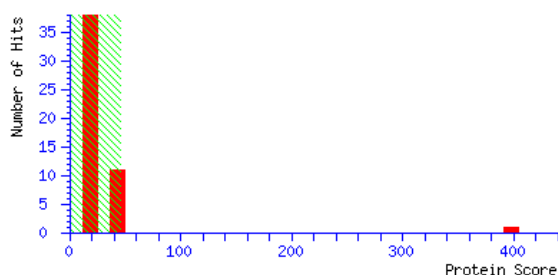

Matched peptide sequences: shown in **Bold Red**:

```
1 MAEDEDNQQG QGEGCLKYLGF VQDAATYAVT TFSNVYLFAK DKSGPLQPGV
51 DIIEGPVKNV AVPLYNRFSY IPNGALKFVD STVVASVTII DRSLPPIVKD
101 ASIQVVS AIR AAPEAARSLA SSLPGQTKIL AKVFGYEN
```

Band No.: B1

NCBI accession No.: [gi|132270](#)

Species: *Hevea brasiliensis*

PFF score: [\[282\]](#)

Protein name: **Rubber elongation factor protein; Short=REF;**

**AltName: Allergen=Hev b 1**

Matched peptides No.: [\[4\]](#)

Sequence coverage %: [\[38\]](#)

Matched sequences: **K.DKSGPLQPGVDIIEGPVK.N; K.NVAVPLYNR.F;**

**K.FVDSTVVASVTIIDR.S; K.DASIQVSAIR.A**

Calculated Mr: **14713**

Calculated pI: **5.04**

Probability Based Mowse Score:

Ions score is  $-10 \cdot \log(P)$ , where P is the probability that the observed match is a random event.

Individual ions scores  $> 45$  indicate identity or extensive homology ( $p < 0.05$ ).

Protein scores are derived from ions scores as a non-probabilistic basis for ranking protein hits.

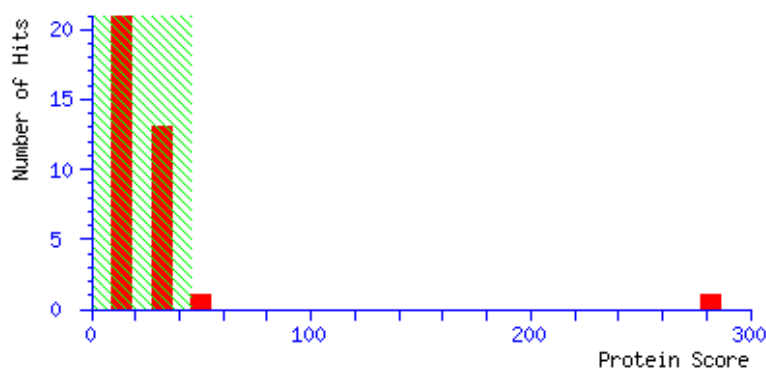

Matched peptide sequences: shown in **Bold Red**:

```
1 MAEDEDNQQG QGEGCLKYLG FVQDAATYAVT TFSNVYLFAK DKSGPLQPGV
51 DIIEGPVKNV AVPLYNRFSY IPNGALKFVD STVVASVTII DRSLPPIVKD
101 ASIQVSAIR AAPEAARSLA SSLPGQTKIL AKVfyGEN
```

Band No.: **B2**

NCBI accession No.: **gi|225440045**

Species: *Vitis vinifera*

Protein name: **cell division cycle protein 48 homolog**

**PMF** score: **90**

Sequence coverage %: **32**

Matched peptides No.: **23**

Total peptides No.: **49**

Calculated Mr: **90331**

Calculated pI: **5.14**

Probability Based Mowse Score:

Protein score is  $-10 \cdot \log(P)$ , where P is the probability that the observed match is a random event. Protein scores greater than 73 are significant ( $p < 0.05$ ).

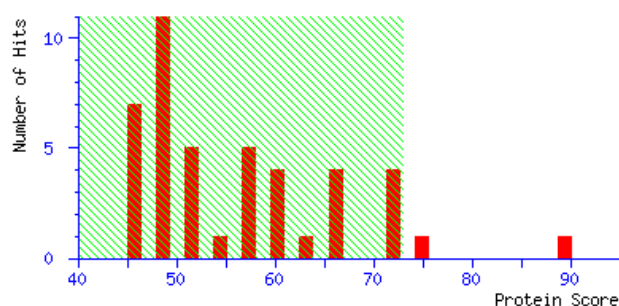

Matched peptide sequences: shown in **Bold Red**

```
1 MSNQAESSDS KGTKRDFSTA ILERKKAA NR LVVDEAVNDD NSVVALHPDT
51 MEKLQLFRGD TILIKGKKRK DTICIALADD TCDEPKIRMN KVVRSNLRVR
101 LGDVVSVHQC PDVKYGKRVH ILPVDDTIEG VTGNLFDAYL KPYFLEAYRP
151 VRKGDLFLVR GGMRSVEFKV IETDPAEYCV VAPDTEIFCE GEPVREDED
201 RLDEVGYDDV GGVRKQMAQI RELVELPLRH PQLFKSIGVK PPKGILLYGP
251 PGSGKTLIAR AVANETGAFF FCINGPEIMS KLAGESESNL RKAFEEAEKN
301 APSIIFIDEI DSIAPKREKT HGEVERRIVS QLLTLMDGLK SRAHVIVIGA
351 TNRPNSIDPA LRRFGRFDRE IDIGVPDEVG RLEVLRIHTK NMKLSEVDL
401 ERIAKDTHGY VGADLAALCT EAALQCIREK MDVIDLEDES IDAEILNSMA
451 VTDEHFKTAL GTSNPSALRE TVVEVPNVSW EDIGGLENVK RELQETVQYP
501 VEHPEKFEKF GMSPSKGVLF YGPPGCGKTL LAKAIANECQ ANFISVKGPE
551 LLTMWFGESE ANVREIFDKA RQSAPCVLFF DELDSIATQR GSSVGDAGGA
601 ADRVLNQLLT EMDGMSAKKT VFIIGATNRP DIIDPALLRP GRLDQLIYIP
651 LPDEDSRHQI FKACLRKSPV SKDVDLRALA KYTQGFSGAD ITEICQRACK
701 YAIRENIEKD IERERRRREN PEAMEEDVDE EVAEIKAAHF EESMKYARRS
751 VSDADIRKYQ AFAQTLQQSR GFGTEFRFSE TSTGAAGSDP FAASAGGAAD
801 EDDLYS
```

Band No.: **B3**

NCBI accession No.: [gi|88193697](#) Species: *Arachis hypogaea*

**PFF** score: **[100]** Protein name: **phospholipase D alpha 2**

Matched peptides No.: **[2]** Sequence coverage %: **[2]**

Matched sequences: [R.SIDGGAAFPGFPEPEDAAR.A](#);

[R.SIDGGAAFPGFPEPEDAAR.A](#)

Calculated Mr: **92340**

Calculated *pI*: **5.54**

### Probability Based Mowse Score:

Ions score is  $-10 \cdot \log(P)$ , where *P* is the probability that the observed match is a random event.

Individual ions scores > 44 indicate identity or extensive homology ( $p < 0.05$ ).

Protein scores are derived from ions scores as a non-probabilistic basis for ranking protein hits.

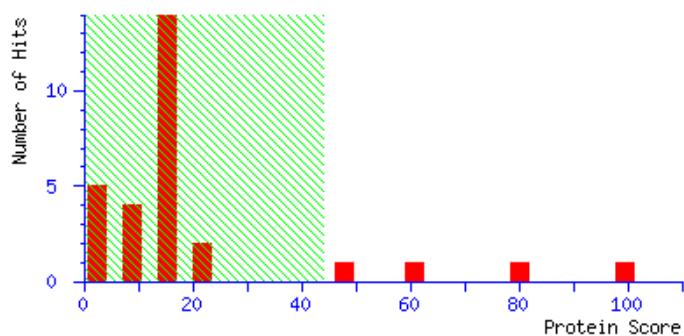

Matched peptide sequences: shown in **Bold Red**

```
1 MAQILLHGTL HVTIYEVDKL KTSGGNVFTK LVQNIIEETVG FGKGVTKLYA
51 TIDLEKARVG RTRIIKDHNS NPRWYSEFHI YCAHMASNII FTVKDDNPIG
101 ATLIGRAYVP VEDVLDGEEV DRWVEILDED KNPIHGNSKI HVKLQYFDVT
151 KDKNWARGVR SAKFPGVPYT FFSQRRGCKV SLYQDAHVPD NFVPKIPLAG
201 GQTYQPHRCW EDVFDAIEKA RHLIYITGWS VYTEITLVRD SRRPKPGGDL
251 TIGELLKKKA NEGVRVLMV WDDRTSVPLL KKDGLMATHD EETEKYFQGT
301 EVHCILCPRN PDDGGSIIQD LQISTMFTHH QKIVVVDSDM PSGDSGKRRI
351 VSFVGGIDLC DGRYDTQFHS LFRTLDTAHH DDFHQPNFAG ASIMKGGPRE
401 PWHDIHSRLE GPIAWDVLFN FEQRWRKQGG KDLLIPLREL EDVIIPPSPV
451 TFAEDQETWN VQLFRSIDGG AAFGFPETPE DAARAGLVSG KDNIIDRSIQ
501 DAYIHAIRRA KNFIYIENQY FLGSCFGWSP DDIKPEDIGA LHLIPKELSL
551 KIVSKIEAGE RFTVYIVVPM WPEGFPESGS VQAILDWQRR TMEEMYKDIV
601 EALNAKGIVE DPRNYLTFFC LGNREVKKPG EYEPSERPDP DSDYIKAQEN
651 RRFMIYVHAK MIVDDEYII IGSANINQRS MDGARDSEIA MGAYQPYLIS
701 ARELARGQIH GFRLALWYEH LGMIRESEFLQ PESEECIKMV NQVADKYWDL
751 YSSESLDHDL PGHLLRYPVG ISGDGTVEL PGFEFFPDTK GRVLGKTIDY
801 LPPILTT
```

Band No.: **B4**

NCBI accession No.: **gi| 225440324** Species: **Vitis vinifera**

Protein name: **heat shock cognate 70 kDa protein isoform 1**

Mascot score: **102**

Sequence coverage %: **36**

Matched peptides No.: **22**

Total peptides No.: **68**

Calculated Mr: **71420**

Calculated pI: **5.17**

Probability Based Mowse Score:

Protein score is  $-10 \cdot \log(P)$ , where P is the probability that the observed match is a random event. Protein scores greater than 73 are significant ( $p < 0.05$ ).

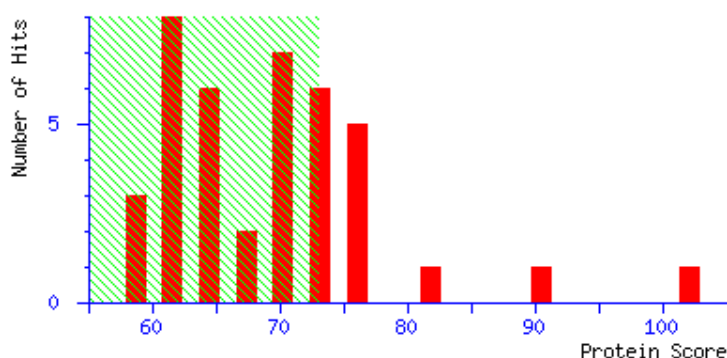

Matched peptide sequences: shown in **Bold Red**

```
1  MAGKGEGPAI  GIDLGTTYSC  VGVWQHDRV  I IANDQGNRT  TPSYVAFTDT
51 ERLVGDAAKN QVAMNPINTV FDAKRLIGRR FSDATVQSDI KLWPFKVVAG
101 PGDKPMIVVN  YKGEEKQFAA  EEISSMVLTK MREIAEAYLG SAVKNNAVTV
151 PAYFNDSQRQ ATKDAGVIAG LNVMRIINEP TAAAIAYGLD KKATSVGEKN
201 VLIFDLGGGT  FDVSLTIEE  GIFEVKATAG  DTHLGGEDFD  NRMVNHVQVE
251 FKRKHKKDIS GNPRALRRLR TACERAKRTL  SSTAQTIEI  DSLYEGVDFY
301 TTITRARFEE  LNMDLFRKCM EPVEKCLRDA  KMDKSSVHDV  VLVGGSTRIP
351 KVQQLLQDFF  NGKELCKSIN  PDEAVAYGAA  VQAAILSSEG  NDKVQDLLLL
401 DVTPLSLGLE  TAGGVMTVLI  PRNTTIPTKK  EQVFSTFSDN QPGVLIQVYE
451 GERTRTRDNN LLGKFELSGI  PPAPRGVPQI  TVCFDIDANG  IILNVAEDKT
501 TGQKNKITIT  NDKGRLSKEE  IEKMVQEAEK  YKSEDEEHKK  KVDAKNALEN
551 YAYNMRNTVK DEKIGAKLPP  ADKKKIEDAI  EQAIQWLDNN  QLAEAEDEFD
601 KMKELESICN  PIIAKMYQGA  GGPDMGGGMD EDGPSAGGSG AGPKIEEVD
```



Band No.: B5

NCBI accession No.: gi|253760141 Species: *Sorghum bicolor*

Protein name: hypothetical protein SORBIDRAFT\_1058s002010

Mascot score: 95

Sequence coverage %: 57

Matched peptides No.: 15

Total peptides No.: 59

Calculated Mr: 23743

Calculated pI: 6.77

Probability Based Mowse Score:

Protein score is  $-10 \cdot \log(P)$ , where P is the probability that the observed match is a random event. Protein scores greater than 73 are significant ( $p < 0.05$ ).

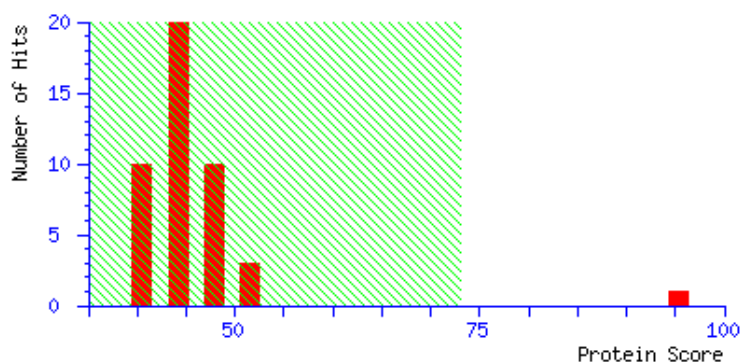

Matched peptide sequences: shown in **Bold red**:

1 **MASAVASMVA** **APKPVFLMDL** **LASPSASSRH** **LFRTGDARPR** **SSSDGVKDST**  
51 **GKDDAAAADG** **RPERDPSIPK** **LFTGDVLDLF** **PEAAKRDLLL** **ALAEDGGGAG**  
101 **SMITGLAPRG** **WWISKKDGDA** **LQLKVAMPGL** **GKEHVKMRAE** **KNVLVIKGEK**  
151 **DKDAEGDKDA** **EGDDDKVPVP** **VPVPARYIYR** **IGLPSQAFKM** **DQIKAEMKNG**  
201 **VLILTMPKIK** **GEGRKDVFGI** **KIE**

Band No.: B6

NCBI accession No.: [gi|14423933](#) Species: *Hevea brasiliensis*

PFF score: [\[348\]](#)

Protein name: Small rubber particle protein; Short=SRPP; AltName:  
Full=22 kDa rubber particle protein; Short=22 kDa RPP; AltName:  
Full=27 kDa natural rubber allergen; AltName: Full=Latex allergen Hev  
b 3; AltName: Allergen=Hev b 3

Matched peptides No.: [\[4\]](#) Sequence coverage %: [\[21\]](#)

Matched sequences: **K.QVSAQTYSVAQDAPR.I; R.IVLDVASSVFNTGVQEGAK.A;**  
**R.IVLDVASSVFNTGVQEGAK.A; K.AEQYAVITWR.A**

Calculated Mr: [22331](#)

Calculated pI: [4.80](#)

Probability Based Mowse Score:

Ions score is  $-10 \cdot \log(P)$ , where P is the probability that the observed match is a random event.  
Individual ions scores  $> 44$  indicate identity or extensive homology ( $p < 0.05$ ).  
Protein scores are derived from ions scores as a non-probabilistic basis for ranking protein hits.

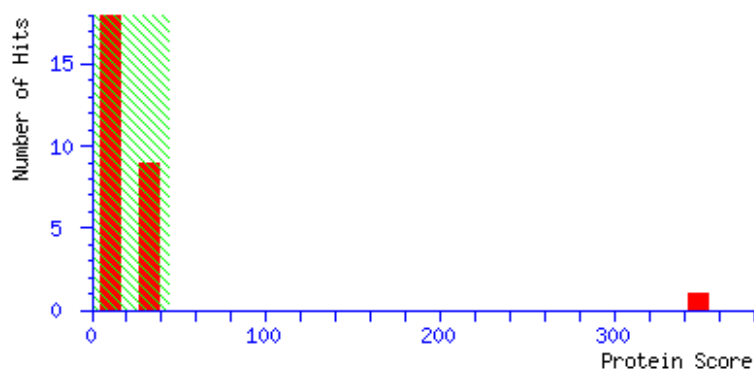

Matched peptide sequences: shown in **Bold Red**:

```
1 MAEEVEEERL KYLDFVRAAG VYAVDSFSTL YLYAKDISGP LKPGVDTIEN
51 VVKTVVTPVY YIPLEAVK FV DKTVDVSVTS LDGVVPPVIK QVSAQTYSVA
101 QDAPRIVLDV ASSVFNTGVQ EGAKALYANL EPKAEQYAVI TWRALNKLPL
151 VPQVANVVVP TAVYFSEKYN DVVRGTTEQG YRVSSYLPLL PTEKITKVFG
201 DEAS
```

Band No.: **B7**

NCBI accession No.: **gi|260099871** Species: *Hevea Brasiliensis*

Protein name: **beta-1,3-glucanase**

Mascot score: **125**

Sequence coverage %: **40**

Matched peptides No.: **16**

Total peptides No.: **38**

Calculated Mr: **41543**

Calculated pI: **9.40**

Probability Based Mowse Score:

Protein score is  $-10 \cdot \log(P)$ , where P is the probability that the observed match is a random event. Protein scores greater than 73 are significant ( $p < 0.05$ ).

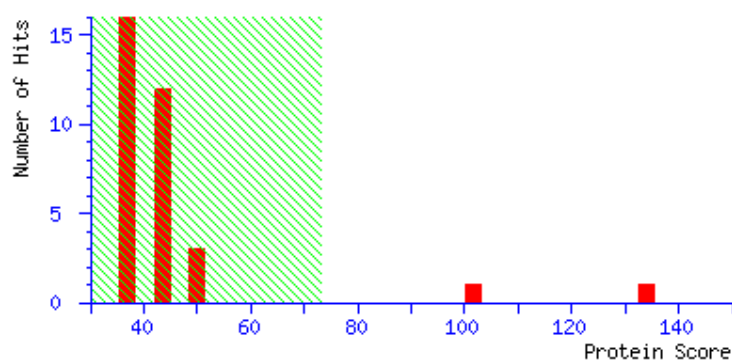

Matched peptide sequences: shown in **Bold Red**

```
1  MAISSSTSGT  SSSLPSRTTV  MLLFFFTAS  VGITDAQVGV  CYGMQGNNLP
51  PVSEVIALYK  KSNITRMRIY  DPNQAVLEAL  RGSNIELILG  VPNSDLQSLT
101 NPSNAKSWVQ  KNVRGFWSSV  RFRYIAVGNE  ISPVNRGTAW  LAQFVLPAMR
151 NIHDAIRSAG  LQDQIKVSTA  IDLTLVGNSY  PPSAGAFRDD  VRSYLNPIIR
201 FLSSIRSPLL  ANIYPYFTYA  GNPRDISLPY  ALFTSPSVVV  WDGQRGYKNL
251  FDATLDALYS  ALERASGGSL  EVVSESGWP  SAGAFAAFED  NGRTYLSNLI
301 QHVKRGTPKR  PKRAIETYLF  AMPDENKKQP  EVEKHFGLFF  PNKWQKYNLN
351  FSAEKNWDIS  TEHNATILFL  KSDM
```

Band No.: **B8**

NCBI accession No.: gi| **10946499** Species: *Hevea Brasiliensis*

Protein name: **beta-1,3-glucanase**

Mascot score: **187**

Sequence coverage %: **61**

Matched peptides No.: **20**

Total peptides No.: **62**

Calculated Mr: **35295**

Calculated pI: **9.46**

Probability Based Mowse Score:

Protein score is  $-10 \cdot \log(P)$ , where P is the probability that the observed match is a random event. Protein scores greater than 73 are significant ( $p < 0.05$ ).

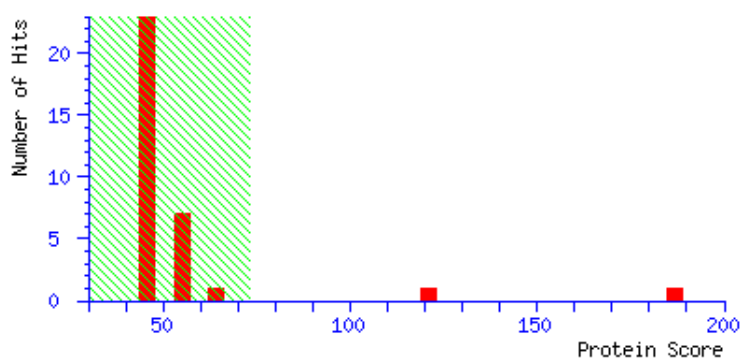

Matched peptide sequences: shown in **Bold Red**

```
1  QVGVCYGMQG  NNLPPVSEVI  ALYKKSNIIR  MRIYDPNRAV  LEALRGSNIE
51  LILGVNSDL  QSLTNPSNAK  SWVQKNVRGF  WSSVLFYRIA  VGNEISPVNR
101 GTAWLAQFVL  PAMRNIHDAI  RSAGLQDQIK  VSTAILTLV  GNSYPPSAGA
151 FRDDVRSYLN  PIIRFLSSIR  SPLLANIYPY  FTYAGNPRDI  SLPYALFTSP
201 SVVVWDGQRG  YKNLFDATLD  VLYSALERAS  GGSLEVVVSE  SGWPSAGAFA
251 ATFDNGRTYL  SNLIQHVKRG  TPKRPNRAIE  TYLFAMFDEN  KKQPEVEKQF
301 GLFFPDKWQK  YNLNFG
```

Band No.: B9

NCBI accession No.: [gi|255540341](#) Species: *Ricinus communis*

Protein name: [glyceraldehyde 3-phosphate dehydrogenase, putative](#)

Mascot score: 103 Sequence coverage %: 48

Matched peptides No.: 15 Total peptides No.: 82

Calculated Mr: 36930 Calculated *pI*: 7.10

Probability Based Mowse Score:

Protein score is  $-10 \cdot \log(P)$ , where *P* is the probability that the observed match is a random event. Protein scores greater than 73 are significant ( $p < 0.05$ ).

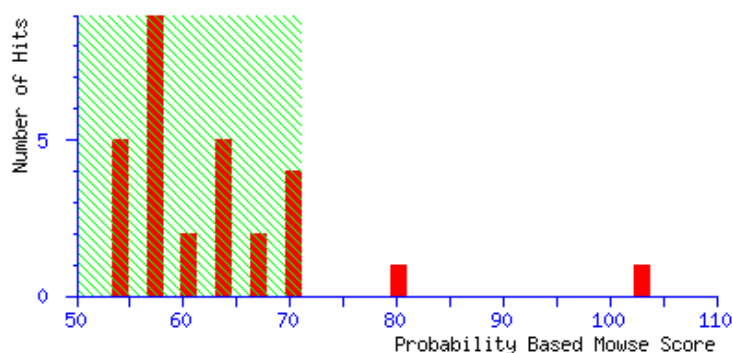

Matched peptide sequences: shown in **Bold red**:

```
1 MAKIKIGING FGRIGRLVAR VALQRDDVEL VAVNDPFIST EYMTYMFKYD
51 TVHGQWKHHE LKIKDDKTL FGEKPVTVFG VRNPEEIPWA ETGAEYIVES
101 TGVFTDKDKA AAHLKGGAKK VIISAPSKDA PMFVVGVNEK EYTPDLHIIS
151 NASCTTNCLA PLAKVINDRF GIVEGLMTTV HSITATQKTV DGPSMKDWRG
201 GRAASFNIIP SSTGAAKAVG KVLPSLNGKL TGMSFRVPTV DVSVVDLTVR
251 LEKSATYEQI KAAIKEESEG KLGILGYTE DDVVSTDFIG DKRSSIFDAK
301 AGIALNDRKFV KLVSWYDNEW GYSTRVVDLI VHVASVH
```

Band No.: **B10**

NCBI accession No.: **gi|14423933** Species: **Hevea**

**Brasiliensis**

Protein name: **Small rubber particle protein**

Mascot score: **160**

Sequence coverage %: **77**

Matched peptides No.: **13**

Total peptides No.: **44**

Calculated Mr: **22331**

Calculated pI: **4.80**

Probability Based Mowse Score:

Protein score is  $-10 \cdot \log(P)$ , where P is the probability that the observed match is a random event. Protein scores greater than 73 are significant ( $p < 0.05$ ).

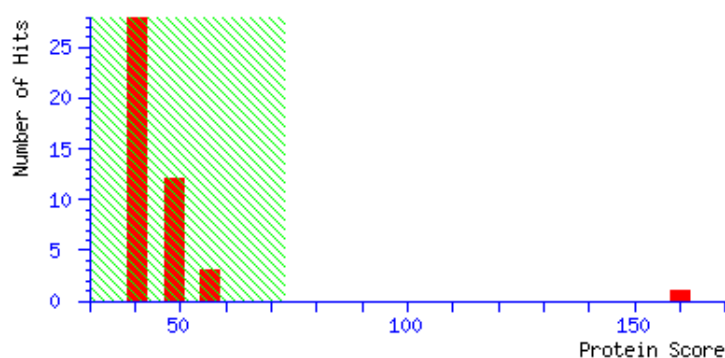

Matched peptide sequences: shown in **Bold Red**

```
1 MAEEVEEERL KYLDFVRAAG VYAVDSFSTL YLYAKDISGP LKPGVDTIEN
51 VVKTVVTPVY YIPLEAVKEV DKTVDVSVTS LDGVVPPVIK QVSAQTYSVA
101 QDAPRIVLDV ASSVFNTGVQ EGAKALYANL EPKAEQYAVI TWRALNKLPL
151 VPQVANVVVP TAVYFSEKYN DVVRGTTEQG YRVSSYLPLL PTEKITKVFG
201 DEAS
```



Band No.: **B11**

NCBI accession No.: **gi| 38122474** Species: **Hevea Brasiliensis**

Protein name: **rubber elongation factor**

Mascot score: **106**

Sequence coverage %: **42**

Matched peptides No.: **10**

Total peptides No.: **29**

Calculated Mr: **19570**

Calculated pI: **5.06**

Probability Based Mowse Score:

Protein score is  $-10 \cdot \log(P)$ , where P is the probability that the observed match is a random event. Protein scores greater than 73 are significant ( $p < 0.05$ ).

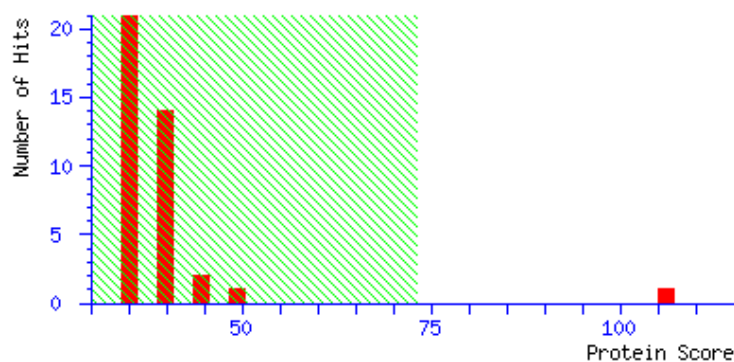

Matched peptide sequences: shown in **Bold Red**

```
1 MAEGEEEVNI QEEANKGEEN PQEEANIQEE TNKGEENIQE EANIEEEANK
51 EEESLKYLDF VQAATVYARA SFSKLYLFAK DKSGPFKPGV NTVESRFKSV
101 VRPVYNKFQP VPNKVLKPAD RRVDAYVTVL DRIVPPIVKR ASIQAYSVAP
151 GAALAVASYL PLHTKRLSKV LYGDG
```



Band No.: B12

NCBI accession No.: gi|3288200

Species: *Hevea brasiliensis*

Protein name: latex allergen

Mascot score: 87

Sequence coverage %: 41

Matched peptides No.: 12

Total peptides No.: 43

Calculated Mr: 43020

Calculated pI: 5.00

Probability Based Mowse Score:

Protein score is  $-10 \cdot \log(P)$ , where P is the probability that the observed match is a random event. Protein scores greater than 73 are significant ( $p < 0.05$ ).

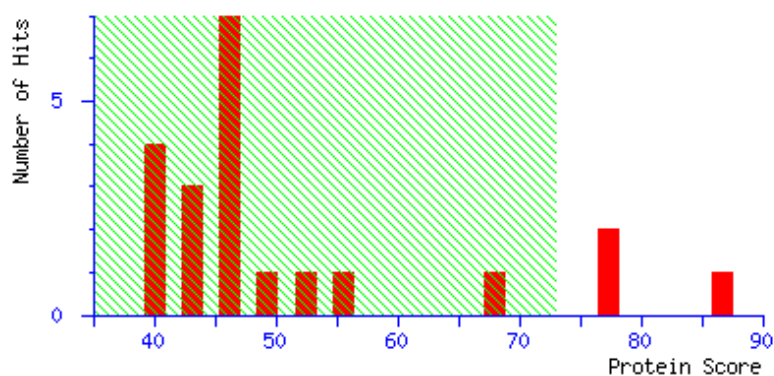

Matched peptide sequences: shown in **Bold red**:

```
1  MATGSTTLTQ  GKKITVLSID  GGGIRGIIPG  IILASLESKL  QDLGPDARI
51  ADYFDIIAGT  STGGLITTML  TAPNEDKKPI  YQAKDIKDFY  LENCPKIFPK
101  ESRDTYDPIH  SIGPIYDGEY  LRELCNNLLK  DLTVKDTLTD  VIIPAFDIKL
151  LLPVIFSSDD  AKCNALKNAR  LADVCISTSA  APVLLPAHSF  TTEDDKNIHT
201  FELIDGGVAA  ANPTLLALTH  IRNEIIRQNP  RFIGANLTES  KSRLVLSLGT
251  GKSEYKEKYN  ADMTSKWRLY  NWALYNGNSP  AVDIFSNASS  DMVDFHLSAL
301  FKSLDCEDYY  LRIQDDTLTG  EESSGHIATE  ENLQRLVEIG  TELLEKQESR
351  INLDTGRLES  IPGAPTNEAA  IAKFAKLLSE  ERKLRQLK
```

Band No.: B13

NCBI accession No.: [gi|334854628](#) Species: *Hevea brasiliensis*

PFF score: [\[271\]](#) Protein name: **rubber elongation factor**

Matched peptides No.: [\[3\]](#) Sequence coverage %: [\[27\]](#)

Matched sequences: **K.DKSGPLQPGVDIIEGPVK.N; K.NVAVPLYNR.F;**  
**K.DASIQVVS AIR.A**

Calculated Mr: **14889**

Calculated pI: **5.04**

Probability Based Mowse Score:

Ions score is  $-10 \cdot \log(P)$ , where P is the probability that the observed match is a random event.

Individual ions scores  $> 45$  indicate identity or extensive homology ( $p < 0.05$ ).

Protein scores are derived from ions scores as a non-probabilistic basis for ranking protein hits.

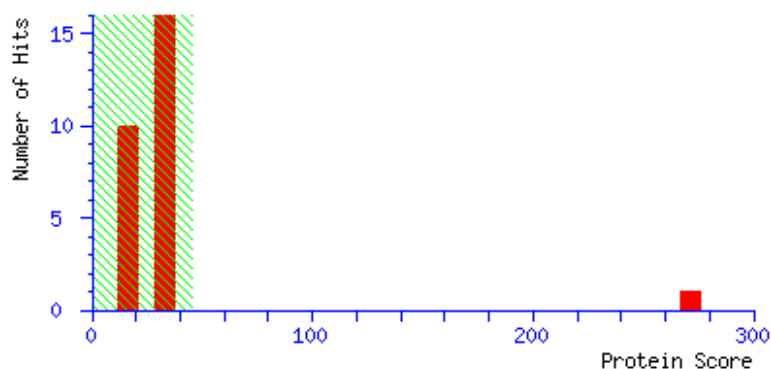

Matched peptide sequences: shown in **Bold Red**

```
1 MAEDEDNQGG QGEGCLKYLG FVQDAATYAVT TFSNVYLFAK DKSGPLQPGV
51 DIIEGPVKNV AVPLYNRFSY IPNGALKFVD SPVVASVTII DRSLPPIVKD
101 ASIQVVS AIR AAPEEARFLA FFLPGQTKIL AKVIFYGEN
```

Band No.: **B14**

NCBI accession No.: [gi|14423688](#) Species: *Hevea brasiliensis*

Protein name: Enolase 1; AltName: Full=2-phospho-D-glycerate hydro-lyase 1; AltName: Full=2-phosphoglycerate dehydratase 1; AltName: Allergen=Hev b 9

Mascot score: **117** Sequence coverage %: **48**

Matched peptides No.: **20** Total peptides No.: **71**

Calculated Mr: **48029** Calculated pI: **5.57**

Probability Based Mowse Score:

Protein score is  $-10 \cdot \log(P)$ , where P is the probability that the observed match is a random event. Protein scores greater than 73 are significant ( $p < 0.05$ ).

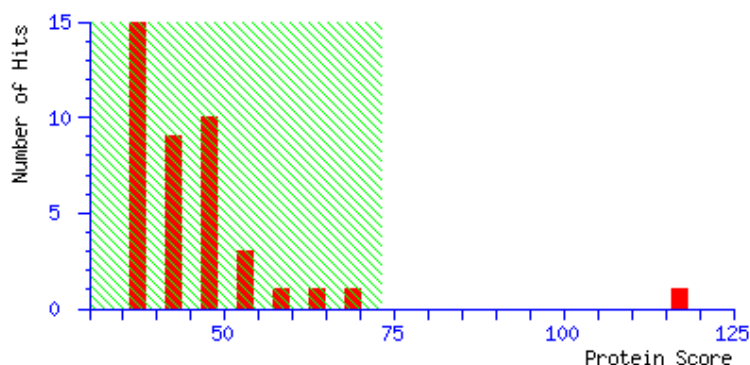

Matched peptide sequences: shown in **Bold red**:

```
1 MAITIVSVRA RQIFDSRGNP TVEADVKLSD GYLARAAVPS GASTGIYEAL
51 ELRDGGSDDL GKGVSKAVEN VNIIIGPALV GKDPTDQVGI DNFMVQQLDG
101 TVNEWGWCKQ KLGANAILAV SLAVCKAGAH VKGIPLYEHI ANLAGNKNLV
151 LPVPAFNVIN GGSHAGNKLA MQEFMILPVG ASSFKEAMKM GAEVYHHLKS
201 VIKKKYQDA TNVGDEGGFA PNIQENKEGL ELLKTAIAKA GYTGKVVIGM
251 DVAASEFYGS DQTYDLNFKE ENNNGSQKIS GEALKDLYKS FVAEYPIVSI
301 EDPFDQDDWA HYAKLTSEIG EKVQIVGDDL LVTNPKRVEK AIKEKACNAL
351 LLKVNQIGSV TESIEAVKMS KRAGWGMAS HRSGETEDTF IADLSVGLAT
401 GQIKTGAPCR SERLAKYNQL LRIIEELGSE AVYAGANFRK PVEPY
```

Band No.: B15

NCBI accession No.: [gi|255543357](#) Species: *Ricinus communis*

Protein name: [heat shock protein, putative](#)

Mascot score: 85

Sequence coverage %: 22

Matched peptides No.: 9

Total peptides No.: 17

Calculated Mr: 71965

Calculated pI: 5.27

Probability Based Mowse Score:

Protein score is  $-10 \cdot \log(P)$ , where P is the probability that the observed match is a random event. Protein scores greater than 73 are significant ( $p < 0.05$ ).

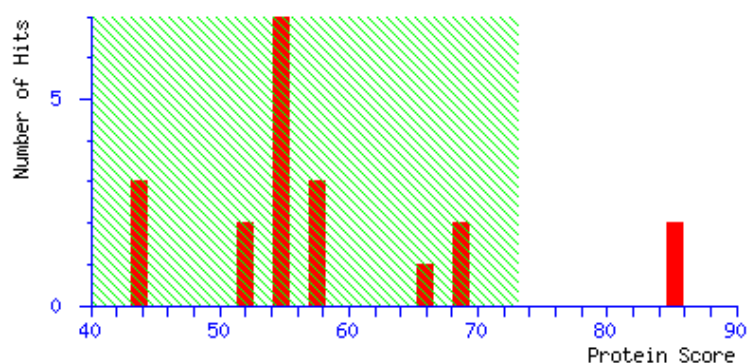

Matched peptide sequences: shown in **Bold red**:

```
1  MAKTEGKAVG  IDLGTTYSCV  GVWQNDRVEI  IANDQGNRTT  PSYVAFTDTE
51  RLIGDAAKNQ  VAMNPQNTVF  DAKRLIGRRF  SDPSVQSDMK  HWPFKVVPGP
101  GDKPMIVVLY  KGEEKQFAPE  EISSMVLIKM  KEIAEAYLGQ  TVKNAVITVP
151  AYFNDSQRQA  TKDAGAISGL  NVMRIINEPT  AAAIAYGLDK  KGSRSGEKNV
201  LIFDLGGGTF  DVSLLTIEEG  IFEVKATAGD  THLGGEDFDN  RLVNHFVAEF
251  RRKHKKDIST  NARALRRLRT  ACERAKRTLS  STSQTTIEID  SLYEGIDFYS
301  TITRARFEEL  NMDLFRKCME  PVEKCLRDSK  IDKSQVDDIV  LVGGSTRIPK
351  VQQLLQDFFN  GKELCKSINP  DEAVAYGAAV  QAAILSGEGD  QKVQELLLLD
401  VTPLSLGIET  AGGVMTVLIP  RNTTIPAKKE  QIFSTYSDNQ  PGVLIQVYEG
451  ERARTKDNNL  LGTFELKGIP  PAPRGVPQIN  VCFDIDANGI  LNVSAEDKTA
501  GVKNKITITN  DKGRLSKEDI  ERMVQEAKEY  KAEDQVKKK  VEAKNALENY
551  AYNMRNTVKD  EKFAKGLDSA  DKQKIEKAID  ETIEWLDGNQ  LAEVDEFEDK
601  LKELEGLCNP  IVSKMYQGGA  GGDVPMGGGA  KPGSGYGNAS  SGGSGSGPKI
651  EEVD
```

Band No.: B16

NCBI accession No.: gi|225456951

Species: *Vitis vinifera*

Protein name: cell division cycle protein 48 homolog

Mascot score: 88

Sequence coverage %: 33

Matched peptides No.: 27

Total peptides No.: 121

Calculated Mr: 91020

Calculated pI: 5.12

Probability Based Mowse Score:

Protein score is  $-10 \cdot \log(P)$ , where P is the probability that the observed match is a random event. Protein scores greater than 73 are significant ( $p < 0.05$ ).

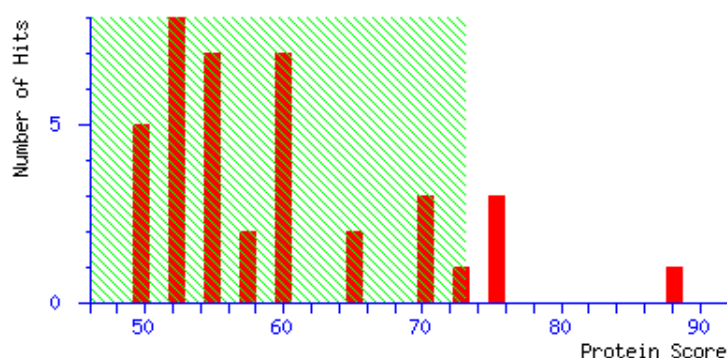

Matched peptide sequences: shown in **Bold red**

```
1  MADPSSSGPS  SSPEVKSVKK  DFSTAILERK  KSPNRLVVDE  AVNDDNSVVS
51  MNPATMEKLQ  FFRGDTVLIK  GKRRKDTVCI  VLVDEQCEEP  KIRMNKVVRA
101 NLRVRLGDVV  SVHQCPDVKY  GKR VHILPID  DTIEGVTGNL  FDAYLKPYPFL
151 ESYRPFVRKGD  LFLVRGGMRS  VEFKVIETDP  GEYCVVAPDT  EIFCEGEPIK
201 REDEERLNEV  GYDDVGGVRK  QMAQIRELVE  LPLRHPQLFK  SIGVKPPKGI
251 LLYGPPGSGK  TLIARAVANE  TGAFFFLING  PEIMSKLAGE  SESNLRKAFE
301 EAEKNAPSII  FIDELDSIAP  KREKTHGEVE  RRIVSQLLTL  MDGLKTRAHV
351 IVIGATNRPN  SIDPALRRFG  RFDREIDIGV  PDEVGRLEVL  RIHTKNMKLS
401 DDVDLERVAK  DTHGYVGADL  AALCTEALQ  CIREKMDVID  LEDETIDAEV
451 LNSMAVTNEH  FQTALGSSNP  SALRETVVEV  PNVSWEDIGG  LDNVKRELQE
501 TVQYPVEHPE  KFEKFGMSPS  KGVLFYGPFG  CGKTL LAKAI  ANECQANFIS
551 VKGPELLTMW  FGESEANVRE  IFDKARQSAP  CVLFFDELDS  IATQRGSSVG
601 DAGGAADRVL  NQLLTEM DGM  TAKKT VFIIG  ATNRPDIIDP  ALLRPGRLDQ
651 LIYIPLPDEA  SRLQIFKA CL  RKSPVSRDVD  LVALARYTHG  FSGADITEIC
701 QRSCKYAIRE  NIEKDIERER  KKTENPEAME  EDDVDDVPEI  KAAHFEE SMK
751 FARRSVSDAD  IRKYQLFAQT  LQQSRGFGSE  FRFPDQP NNA  TAASTAADPF
801 SSAAAAGDDD  DLYS
```

Band No.: B17

NCBI accession No.: [gi|66735596](#) Species: *Arachis hypogaea*

PFF score: [67] Protein name: phospholipase D alpha

Matched peptides No.: [1] Sequence coverage %: [10]

Matched sequences: **R.SIDGGAAFGFPETPEDAAR.A**

Calculated Mr: 21036

Calculated pI: 5.22

Probability Based Mowse Score:

Ions score is  $-10 \cdot \log(P)$ , where P is the probability that the observed match is a random event.

Individual ions scores > 44 indicate identity or extensive homology ( $p < 0.05$ ).

Protein scores are derived from ions scores as a non-probabilistic basis for ranking protein hits.

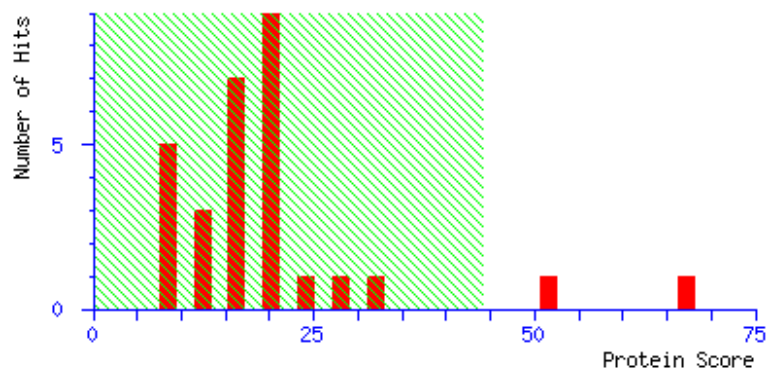

Matched peptide sequences: shown in **Bold Red**:

```
1  HHDDFHQPNF  AGASIMKGGP  REPWHDIHSR  LEGPIAWDVL  FNFEQRWRKQ
51 GGDLLIPLR   ELEDVIIPPS  PVTFAEDQET  WNVQLFRSID  GGAAFGFPET
101 PEDAARAGLV  SGKDNIIDRS  IQDAYIHAIR  RAKNFIYIEN  QYFLGSCFGW
151 SPDDIKPEDI  GALHLIPKEL  SLKNVSKIEA  GERFT
```



Band No.: B18

NCBI accession No.: [gi|33326375](#)

Species: *Hevea brasiliensis*

Protein name: [heat shock protein](#)

Mascot score: 90

Sequence coverage %: 28

Matched peptides No.: 17

Total peptides No.: 52

Calculated Mr: 80380

Calculated *pI*: 5.02

Probability Based Mowse Score:

Protein score is  $-10 \cdot \log(P)$ , where  $P$  is the probability that the observed match is a random event. Protein scores greater than 73 are significant ( $p < 0.05$ ).

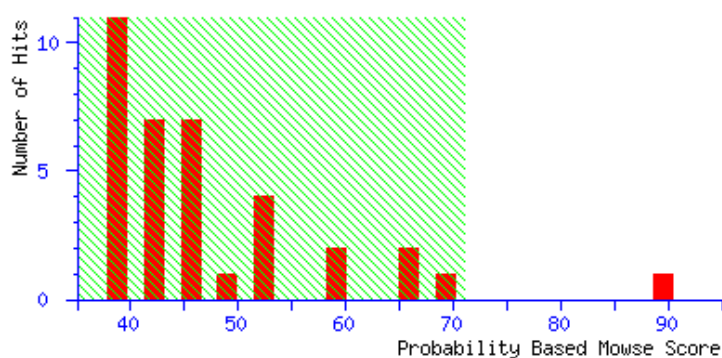

Matched peptide sequences: shown in **Bold red**

```
1  MADAETFFAFQ AEINQLLSLI INTFYSNKEI FLREIISNAS DALDKIRFES
51 LTDKSKLDAQ PELFIRLVPD KANKTLSIID SGIGMTKADL VNNLGTIARS
101 GTKEFMEALQ AGADVSMIGQ FGVGFYSAYL VAEKVIVITK HNDDEQYIWE
151 SQAGGSFTVT RDVNGDQLGR GTKITLFLKE DQLEYLEERR IKDLVKKHSE
201 FISYPIYLWT EKTTEKEISD DEDDEPKKEE EGDVEDVDEE KETKSKKKKI
251 KEVSHWQLI NKQKPIWLRK PEEITKEEYA SFYKSLTNDW EDHLAVKHFS
301 VEGQLEFKAI LFPVKRAPFD LFDTRKKMSN IKLYVRRVFI MDNCEELIPE
351 YLGFKVGVVD SDDLPLNISR EMLQQNKILK VIRKNLVKKC IEMFNEIAEN
401 KEDYNKFYEA FSKNLKLGIIH EDSQNRKLA DLLRYHSTKS GDEMTSLKDY
451 VTRMKEGQKD IYYITGESKK AVENSPFLER LKKKGYEVLF MVDAIDEYAV
501 GQLKEYDGKK LVSATKEGLK LDDETEEEKK KKEEKKKSFE NLCKTIKDIL
551 GDKVEKVVVS DRIVDSPCCL VTGEYGWTAN MERIMKAQAL RDSSMSSYMS
601 SKKTMEINPD NVIVEELRKR AEADKNDKSV KDLVLLLFET ALLTSGFSLD
651 DPNTFSARIH RMLKLGLSID DDETAGDDAD MPALEEDGAE ESKMEEVD
```

Band No.: B19

NCBI accession No.: [gi|450880](#) Species: *Arabidopsis thaliana*

Protein name: [heat shock cognate 70-1](#)

Mascot score: [107](#) Sequence coverage %: [47](#)

Matched peptides No.: [28](#) Total peptides No.: [83](#)

Calculated Mr: [70427](#) Calculated pI: [5.11](#)

Probability Based Mowse Score:

Protein score is  $-10 \cdot \log(P)$ , where P is the probability that the observed match is a random event. Protein scores greater than 73 are significant ( $p < 0.05$ ).

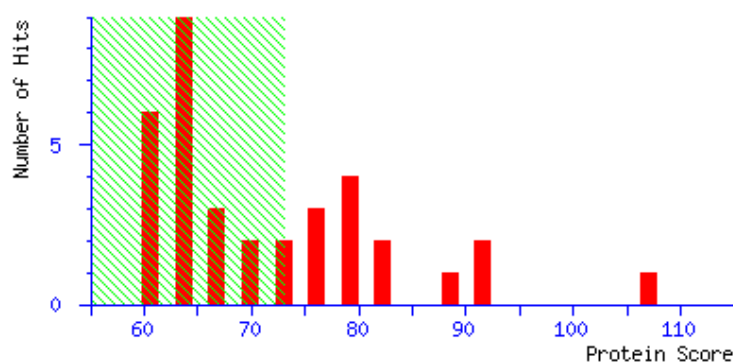

Matched peptide sequences: shown in **Bold red**

```
1  GTTYSCVGVW  QHDRVEIIAN  DQGNRTTPSY  VAFDTSERLI  GDAARNQVAM
51  SPVNTVFDAK  RLIGRRFSDS  SVQSDMKLWP  FKIQAGPADK  PMIYVEYKGE
101 EKEFAAEEIS  SMVLIKMREI AEAYLGVTIK NAVVTVPAYF NDSQRQATKD
151 AGVIAGLNVM  RIINEPTAAA IAYGLDKKAT RVGEKNVLIF  DLGGGTFDVS
201 LLTIEEGIFE  VKATAGDTHL  GGEDFDNRMV  NHFVQEFKRR  SKKDITGNPR
251 ALRRLRTSCE  RAKRTLSTA  QTTIEIDSLY  EGIDFYSTIT  RARFEELNMD
301 LFRKCMEPVE  KCLRDAKMDK  STVHDVVLVG GSTRIPKVQQ LLQDFPNGKE
351 LCKSINPVEA  VVYGAAVQGA  ILSGEGNEKV  QDLLLLDVTP  LSLGLETAGG
401 VMTTLIPRNT  TIPTKKEQVF  STYSDNQPGV LIQVYEGERA  RTKDNLLGK
451 FELSGIPPAP  RGVPQITVCF DIDANGILNV SAEDKTTGQK  NKVTITNDKG
501 RLSKDEIEKM  VQEAEKYKSE  DEEHKKKVEA  KNALENYAYN  MRNTIQDEKI
551 GEKLPAADKK  KIEDSIEQAI  QWLEGNQLAE  ADEFEDKMKE  LESICNPIIA
601 KMYQGAGGGEA  GGPGASGMDD  DAPPASGGAG  PKIEEVD
```



Band No.: B20

NCBI accession No.: [gi|379068234](#)

Species: *Rhododendron formosanum*

Protein name: nucleotide-binding site leucine-rich repeat protein

Mascot score: 81

Sequence coverage %: 56

Matched peptides No.: 12

Total peptides No.: 60

Calculated Mr: 28360

Calculated pI: 7.01

Probability Based Mowse Score:

Protein score is  $-10 \cdot \log(P)$ , where P is the probability that the observed match is a random event. Protein scores greater than 73 are significant ( $p < 0.05$ ).

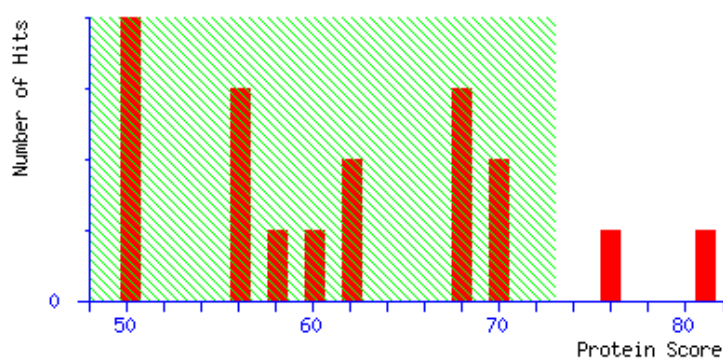

Matched peptide sequences: shown in **bold red**:

```
1 QVAKNTKEEK LFDDVVMATV SQNLDARKIQ GEIADLLGFK FEQESDSGRA
51 DVLRGHLKQK ARVLVILDDV WKRFELNDIG IPFGEDHKGC KILVTSRNEE
101 VCNDMGAQKN FPVQILHKEE AWNLFKEMAG IPEDETNFRS TKMAVANECG
151 GLPIALVTVA RALKGKGKSS WGSALALRK SIGKNVREVV DKVFKSLELS
201 FNFLKSKEAQ RCFLLCSLYS EDYDIPIEDL VRYGYGQKLF GGIKSVGEAR
251 A
```

Band No.: B21

NCBI accession No.: [gi|14423688](#) Species: *Hevea brasiliensis*

Protein name: [Enolase 1; 2-phosphoglycerate dehydratase 1](#)

Mascot score: 101

Sequence coverage %: 35

Matched peptides No.: 10

Total peptides No.: 21

Calculated Mr: 48029

Calculated pl: 5.57

Probability Based Mowse Score:

Protein score is  $-10 \cdot \log(P)$ , where P is the probability that the observed match is a random event. Protein scores greater than 73 are significant ( $p < 0.05$ ).

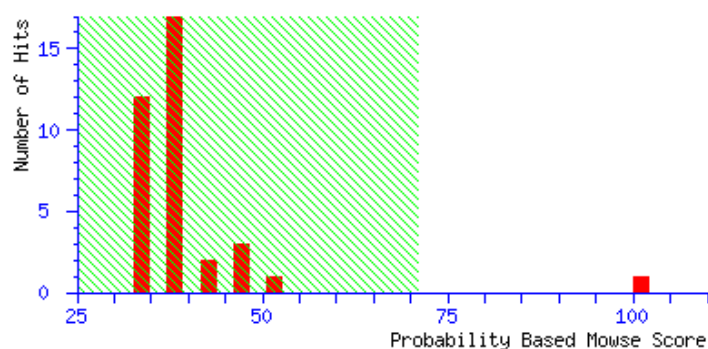

Matched peptide sequences: shown in **Bold red**

```
1 MAITIVSVRA RQIFDSRGNP TVEADVKLSD GYLARAAVPS GASTGIYEAL
51 ELRDGGSDYL GKGVSKAVEN VNIIIGPALV GKDPTDQVGI DNFMVQQLDG
101 TVNEWGWCKQ KLGANAILAV SLAVCKAGAH VKGIPLYEHI ANLAGNKNLV
151 LPVPAFNVIN GGSHAGNKLA MQEFMILPVG ASSFKEAMKM GAEVYHHLKS
201 VIKKKYQDA TNVGDEGGFA PNIQENKEGL ELLKTAIAKA GYTGKVVIGM
251 DVAASEFYGS DQTYDLNFKE ENNNGSQKIS GEALKDLYKS FVAEYPIVSI
301 EDPFDQDDWA HYAKLTSEIG EKVQIVGDDL LVTNPKRVEK AIKEKACNAL
351 LLKVNQIGSV TESIEAVKMS KRAGWGVMAS HRSGETEDTF IADLSVGLAT
401 GQIKTGAPCR SERLAKYNQL LRIEEELGSE AVYAGANFRK PVEPY
```

Band No.: B22

NCBI accession No.: [gi|3288200](#) Species: *Hevea brasiliensis*

Protein name: latex allergen

Mascot score: 121 Sequence coverage %: 47

Matched peptides No.: 16 Total peptides No.: 62

Calculated Mr: 43020 Calculated pI: 5.00

Probability Based Mowse Score:

Protein score is  $-10 \cdot \log(P)$ , where P is the probability that the observed match is a random event. Protein scores greater than 73 are significant ( $p < 0.05$ ).

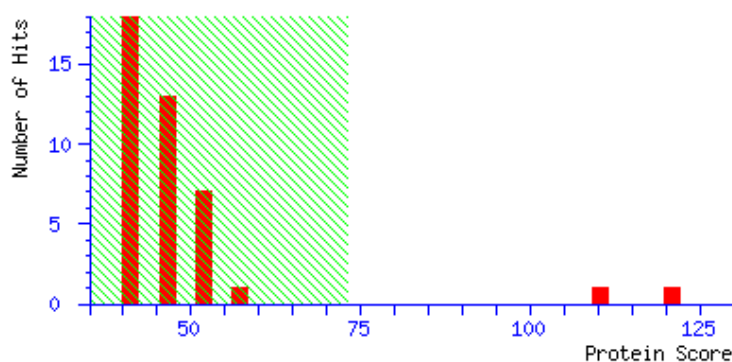

Matched peptide sequences: shown in **Bold red**

|     |                   |                   |                   |                   |                     |
|-----|-------------------|-------------------|-------------------|-------------------|---------------------|
| 1   | MATGSTTLTQ        | <b>GKKITVLSID</b> | <b>GGGIRGIIPG</b> | <b>IILASLESKL</b> | <b>QDLGPDARI</b>    |
| 51  | ADYFDIIAGT        | STGGLITTML        | TAPNEDKKPI        | YQAKDIKDFY        | LENCPK <b>I</b> FPK |
| 101 | <b>ESRDTYDPIH</b> | <b>SIGPIYDGEY</b> | <b>LRELCNNLLK</b> | <b>DLTVKDTLTD</b> | <b>VIIPAFDIKL</b>   |
| 151 | <b>LLPVIFSSDD</b> | <b>AKCNALKNAR</b> | LADVCISTSA        | APVLLPAHSF        | TTEDDKNIHT          |
| 201 | FELIDGGVAA        | ANPTLLALTH        | <b>IRNEIIRQNP</b> | <b>RFIGANLTES</b> | <b>KSRLVLSLGT</b>   |
| 251 | GKSEYKEKYN        | ADMTSKWRLY        | NWALYNGNSP        | AVDIFSNASS        | DMVDFHLSAL          |
| 301 | <b>FKSLDCEDYY</b> | <b>LRIQDDTLTG</b> | <b>EESSGHIATE</b> | <b>ENLQRLVEIG</b> | <b>TELLEKQESR</b>   |
| 351 | <b>INLDTGRLES</b> | <b>IPGAPTNEAA</b> | <b>IAKFAKLLSE</b> | <b>ERKLRQLK</b>   |                     |

Band No.: B23

NCBI accession No.: gi|113217

Species: *Daucus carota*

PFF score: [81]

Protein name: Actin-1

Matched peptides No.: [2]

Sequence coverage %: [7]

Matched sequences: R.AVFPSIVGRPR.H; K.NYELPDGQVITIGAER.F

Calculated Mr: 42246

Calculated pI: 5.64

### Probability Based Mowse Score:

Ions score is  $-10 \cdot \log(P)$ , where P is the probability that the observed match is a random event.

Individual ions scores  $> 44$  indicate identity or extensive homology ( $p < 0.05$ ).

Protein scores are derived from ions scores as a non-probabilistic basis for ranking protein hits.

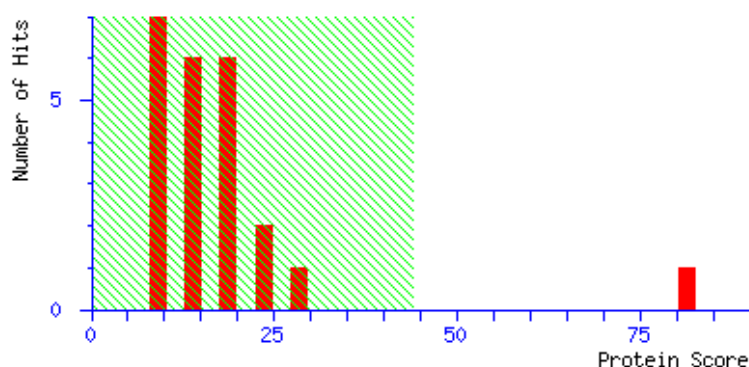

Matched peptide sequences: shown in **Bold Red**:

```
1  MADGEDIQPL  VCDNGTGMVK  AGFAGDDAPR  AVFPSIVGRP  RHTGVMVGMG
51  QKDAYVGDEA  QSKRGIITLK  YPIEHGIVSN  WDDMRIWHHT  FYNELRASPE
101 EHPVLLTEAP  LNPKANREKM  TQIMIETFNV  PAMYVAIQAV  LSLYASGRTT
151 GIVLDSDGDV  SHTVPIYEGY  ALPHAILRLD  LAGRDLTDGL  MKILTEKSIC
201 HYTTAEREIV  RDMKEKLAYV  ALDYEQELET  AKRRSAVEKN  YELPDGQVIT
251 IGAERFRCPQ  VLFQPSMIGM  ESAGIHETTY  NSIMKCDVDI  RKDLYGNIVL
301 SGGSTMFFGI  ADRMSKEITA  LAPSSMKIKV  VAPPERKYSD  LWIGGSILAS
351 LSTFQQMWIS  KGEYDESGPS  IVHRKCLLAG
```

Band No.: B24

NCBI accession No.: [gi|147835357](#) Species: *Vitis vinifera*

Protein name: [hypothetical protein](#)

Mascot score: 84

Sequence coverage %: 34

Matched peptides No.: 25

Total peptides No.: 106

Calculated Mr: 97236

Calculated pI: 6.08

Probability Based Mowse Score:

Protein score is  $-10 \cdot \log(P)$ , where P is the probability that the observed match is a random event. Protein scores greater than 73 are significant ( $p < 0.05$ ).

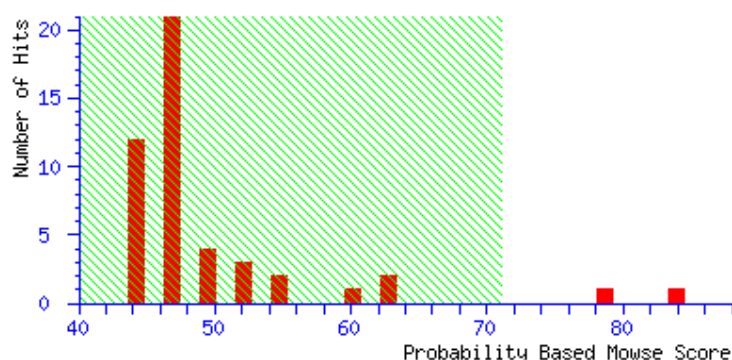

Matched peptide sequences: shown in **Bold red**:

```
1  MVDVVTVFL  EKLLNALEE  GRVLFDFREQ  FERLRDELRL  MQSFLKDAER
51  LKRKNETLRT  VMIGLRELIY  EAEDILADCK  VQSEGSQDIS  GWYAVCFYPT
101 NLPFKYQTGK  RLREINEKIT  RIKQNIPSFL  GVPILSQAEI  ADSRNLVDR
151 WSSSVFDHSQ  VVGIEGDTRK  VKNWLLLEAKD  GILAIQVVGGM  GGVGKTTLAQ
201 VVFNDREMEA  RFERRMWSV  TGTPNEKRIL  RSMRLNLGDM  NVGDDCGELL
251 RKINQYLLGK  RFLVMDDVG  ENTNTWWRKI  SDGLPKGNGS  SIIITRTKE
301 VATMMGVEEE  RTHRPKVLSK  DDSWLLFRNV  AFAANGGICT  SSELENIGRE
351 IVXKCGGLPL  AIKAAGGMML  YQQPYHDWK  RIADHFRDEL  AEEDGSVMAS
401 LELSYEELPS  HLKSCFLCLS  LYPEDCEITK  EQLIHWIAE  GFVPLRRGRL
451 STEAGEDCFS  GLTNRCLIEV  VEKSYTGAIQ  TCKIHDMVRD  LVIKKAEDDA
501 FSGPTTASCR  HLGIEGDIDR  KYDMPNQKLR  ALLSTIKTGE  VNKVASSNAK
551 KFCDCRYLRV  LDXSKTIFDK  SLTGLLDHIG  FLQHLTYSLS  SNTHPLTEVP
601 PALEXLRNLQ  VLDLSYCQNL  KMLPSYVTF  EKLTVLDVSH  CGSLRYPKQ
651 LGSLSNLQVL  LGFKPSKSNQ  LEGCRIAELR  SLTKLRRRLGL  QLTQGDEIGD
701 NDDNVLVGLR  GLQFLVISCF  DSHGDDLIPK  LDKLSPPQQL  HELRLRFYPG
751 KMNPGWLNPF  SLPILRYLSI  SSGNLTNMSQ  RFWGDGDNTW  KIEGLMLESL
801 SDLGMEWSMV  QQVMPRLRIV  NVSWCPDLDS  FPIEDVGRG  GVWKKGERPS
```

Band No.: B25

NCBI accession No.: [gi|170525118](#) Species: *Physalis mendocina*

Protein name: [geranylgeranyl reductase](#)

Mascot score: 81

Sequence coverage %: 76

Matched peptides No.: 7

Total peptides No.: 54

Calculated Mr: 5.67

Calculated pI: 11741

Probability Based Mowse Score:

Protein score is  $-10 \cdot \log(P)$ , where P is the probability that the observed match is a random event. Protein scores greater than 73 are significant ( $p < 0.05$ ).

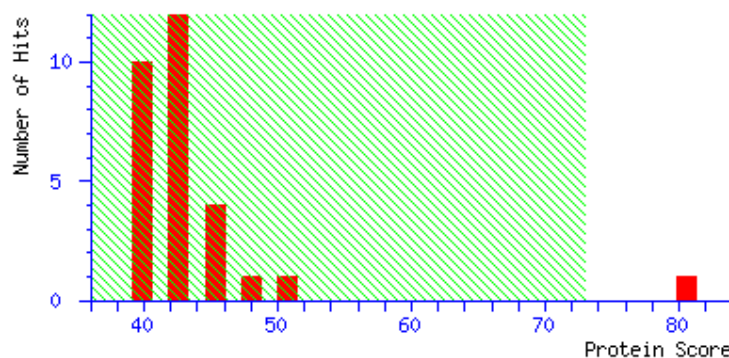

Matched peptide sequences: shown in **Red**:

1 LKPHEYIGMV RREVLDAYLR DRAAEAGASV LNGLFLKMDM PKAPNAPYVL  
51 HYSAYDSKTN GAGEKRTPEV DAVIGADGAN SRVAKSINAG DYEYAIAPQE  
101 RIRISDD



Band No.: B26

NCBI accession No.: [gij145346735](#)

Species: *Ostreococcus lucimarinus CCE9901*

Protein name: [predicted protein](#)

Mascot score: 83

Sequence coverage %: 22

Matched peptides No.: 9

Total peptides No.: 25

Calculated Mr: 43211

Calculated pI: 8.11

Probability Based Mowse Score:

Protein score is  $-10 \cdot \log(P)$ , where P is the probability that the observed match is a random event. Protein scores greater than 73 are significant ( $p < 0.05$ ).

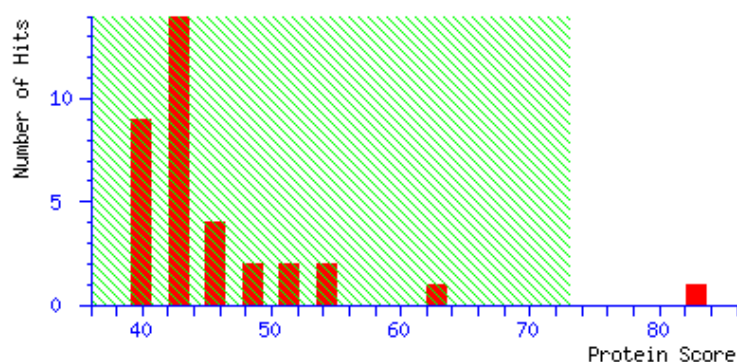

Matched peptide sequences: shown in **Bold red**:

```
1  MSGGARCNVL  PTSATANDFT  TESANRRLKA  VLASWSVERC  REWLETEIGL
51  GLGIEIASNK  YFPLSNSSRE  VRDRLVAACE  KAGVEFKYET  SVDGVVRGSD
101 GMGWTLRVRG  SGDERARAIV  LAMGGLSFPA  VGTDTGTGYAI  ARRDLGHALH
151  EPYPALVPLT  GPHPGGEPLP  GVSVEVELKV  AAANADGGGG  KKKAQAIRKG
201  FLFTHRGYSG  PSVLDLSHHL  VRPLVRANES  KGGSLRDEDF  DAPTSSSPRM
251  VINWSGIKRE  EWQERLTAPP  GRALVVSRLR  EALPSRLADA  LVAESGVDSR
301  CKIAELKKDD  RAKLLRVLTE  YEIAVKGHQG  YRKAEVTTGGG  VALDELDTAS
351  MASLKAPGIY  MCGEVCDVFG  RIGGFNFLWA  WCSGRLAGMS  AAKAISSADD
401  E
```

Band No.: B27

NCBI accession No.: gi| 37903393

Species: *Saccharum hybrid cultivar CP65-357*

PFF score: [101]

Protein name: 14-3-3-like protein

Matched peptides No.: [1]

Sequence coverage %: [4]

Matched sequences: **K.TVDVEELTV**EER.N

Calculated Mr: 28978

Calculated pI: 4.79

Probability Based Mowse Score:

Ions score is  $-10 \cdot \log(P)$ , where P is the probability that the observed match is a random event. Individual ions scores  $> 45$  indicate identity or extensive homology ( $p < 0.05$ ). Protein scores are derived from ions scores as a non-probabilistic basis for ranking protein hits.

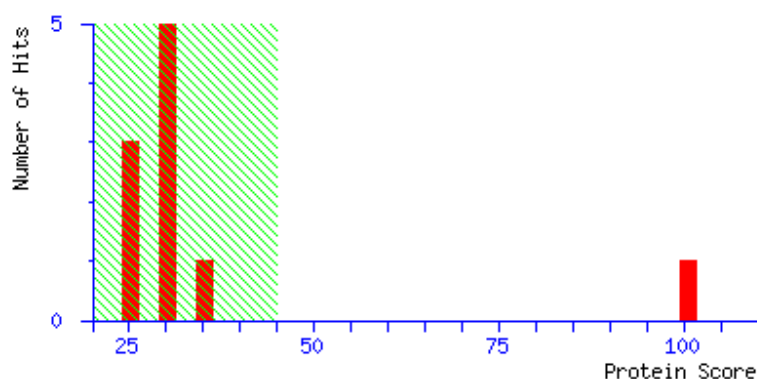

Matched peptide sequences: shown in **Bold Red**:

```
1 MSREENVYMA KLAEQAERYE EMVEYMEKVA KTVDVEELTV EERNLLSVAY
51 KNVIGARRAS WRIVSSIEQK EESRKNEEHV NLIKEYRGKI EAELSNICDG
101 ILKLLDShLV PSSTAAESKV FYLKMKGDYH RYLAEFKTGA ERKESAESTM
151 VAYKAAQDIA LAELAPTHPI RLGLALNFSV FYYEILNSPD KACNLAKQAF
201 DEAISELDTL GEESYKDSTL IMQLLRDNLN LWTSDLTEDG ADEGKEASKG
251 DAGEGQ
```



Band No.: **B28**

NCBI accession No.: **gi|10946499**

Species: *Hevea brasiliensis*

Protein name: **beta-1,3-glucanase**

Mascot score: **181**

Sequence coverage %: **66**

Matched peptides No.: **18**

Total peptides No.: **45**

Calculated Mr: **35295**

Calculated pl: **9.46**

Probability Based Mowse Score:

Protein score is  $-10 \cdot \log(P)$ , where P is the probability that the observed match is a random event. Protein scores greater than 73 are significant ( $p < 0.05$ ).

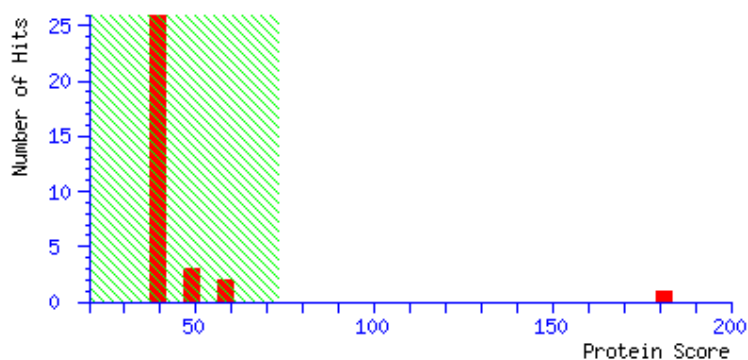

Matched peptide sequences: shown in **Bold red**:

```
1  QVGVCYGMQG  NNLPPVSEVI  ALYKKSNIIR  MRIYDPNRAV  LEALRGSNIE
51  LILGVPNSDL  QSLTNPSNAK  SWVQKNVRGF  WSSVLFYRIA  VGNEISPVNR
101  GTAWLAQFVL  PAMRNIHDAI  RSAGLQDQIK  VSTAILTLV  GNSYPPSAGA
151  FRDDVRSYLN  PIIRFLSSIR  SPLLANIYPY  FTYAGNPRDI  SLPYALFTSP
201  SVVWWDGQRG  YKNLFDATLD  VLYSALERAS  GGSLEVVVSE  SGWPSAGAFV
251  AFDNGRITYL  SNLIQHVKRG  TPKRPNRAIE  TYLFAMFDEN  KKQPEVEKQF
301  GLFFPKWQK  YNLNFG
```

Band No.: B29

NCBI accession No.: [gij124365253](#) Species: *Hevea brasiliensis*

Protein name: [beta-1,3-glucanase](#)

Mascot score: 105

Sequence coverage %: 38

Matched peptides No.: 10

Total peptides No.: 35

Calculated Mr: 41543

Calculated pI: 9.4

Probability Based Mowse Score:

Protein score is  $-10 \cdot \log(P)$ , where P is the probability that the observed match is a random event. Protein scores greater than 73 are significant ( $p < 0.05$ ).

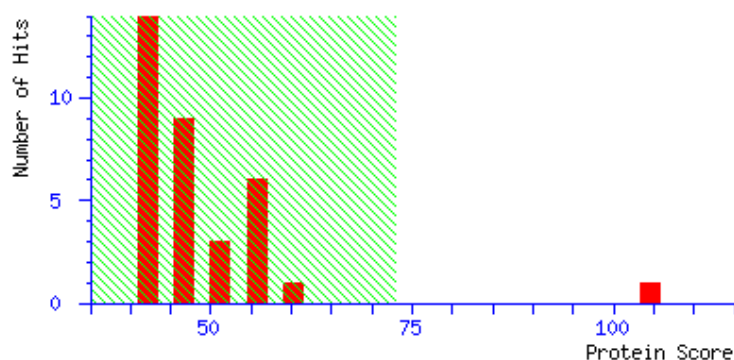

Matched peptide sequences: shown in **Bold red**:

```
1 MAISSSTSGT SSSLPSRTTV MLLFFFTAS VGITDAQVGV CYGMQGNNLP
51 PVSEVIALYK KSNITRMRIY DPNQAVLEAL RGSNIELILG VPNSDLQSLT
101 NPSNAKSWVQ KNVRGFWSSV RFRYIAVGNE ISPVNRGTAW LAQFVLPAMR
151 NIHDAIRSAG LQDQIKVSTA IDLTLVGNSY PPSAGAFRDD VRSYLNPIIR
201 FLSSIRSPLL ANIYPYFTYA GNPRDISLPY ALFTSPSVVV WDGQRGYKNL
251 FDATLDALYS ALERASGGSL EVVSESGWP SAGAFATFD NGRTYLSNLI
301 QHVKRGTPKR PKRAIETYLF AMFDENKKQP EVEKHFGLFF PNKWQKYNLN
351 FSAEKNWDIS TEHNATILFL KSDM
```

Band No.: **B30**

NCBI accession No.: [gi|14423933](#) Species: *Hevea brasiliensis*

Protein name: Small rubber particle protein; Short=SRPP; AltName: Full=22 kDa rubber particle protein; Short=22 kDa RPP; AltName: Full=27 kDa natural rubber allergen; AltName: Full=Latex allergen Hev b 3; AltName: Allergen=Hev b 3

Mascot score: **130** Sequence coverage %: **51**

Matched peptides No.: **10** Total peptides No.: **26**

Calculated Mr: **22331** Calculated pI: **4.80**

Probability Based Mowse Score:

Protein score is  $-10 \cdot \log(P)$ , where P is the probability that the observed match is a random event. Protein scores greater than 73 are significant ( $p < 0.05$ ).

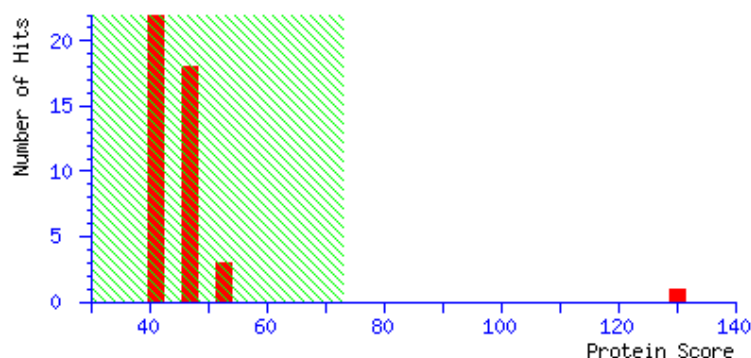

Matched peptide sequences: shown in **Bold red**:

```
1 MAEEVEEERL KYLDFVRAAG VYAVDSFSTL YLYARDISGP LKPGVDTIEN
51 VVKTVVTPVY YIPLEAVKfV DKTVDVSVIS LDGVVPPVIK QVSAQTYsVA
101 QDAPRIVLDV ASSVFNTGVQ EGAKALYANL EPKAEQYAVI TWRALNKLPL
151 VPQVANVVVP TAVYFSEKYN DVVRGTTEQG YRVSSYLPLL PTEKITKVEG
201 DEAS
```

Band No.: B31

NCBI accession No.: gi|313586569 Species: *Hevea brasiliensis*

Protein name: hypothetical protein 19

Mascot score: 132

Sequence coverage %: 48

Matched peptides No.: 12

Total peptides No.: 36

Calculated Mr: 20724

Calculated pI: 7.77

Probability Based Mowse Score:

Protein score is  $-10 \cdot \log(P)$ , where P is the probability that the observed match is a random event. Protein scores greater than 73 are significant ( $p < 0.05$ ).

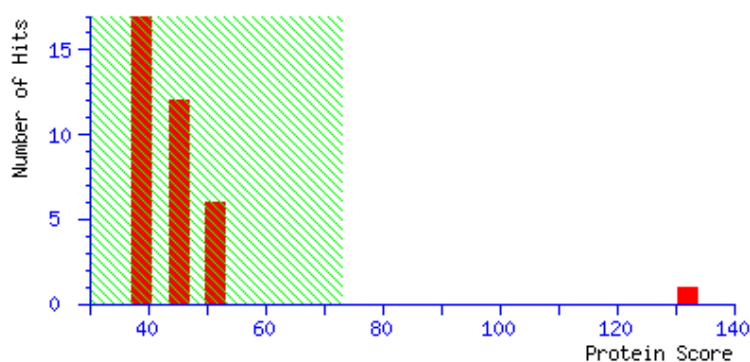

Matched peptide sequences: shown in **Bold red**:

```
1 MEELGSSHEK TESESSHCRK PHLPSGSYLS KKPSYKVYCK ADPNFFLTIR
51 DGKVVLAPPD PSDEFQHWYK DEKFSTMVKD EEGFPSFALV NKASGKALKH
101 SFGPTHVLL TPYDPDDLEA SILWTESKDL GDGYRIVRML NNIRLNVEAL
151 RGDKKSGGVS NGTKVVLAYW NKGDHQKRWRI APL
```

Band No.: B32

NCBI accession No.: gi|327492451

Species: *Mesembryanthemum crystallinum*

Protein name: N-terminal end of polyubiquitin

Mascot score: 162

Sequence coverage %: 96

Matched peptides No.: 12

Total peptides No.: 38

Calculated Mr: 8463

Calculated pI: 6.56

Probability Based Mowse Score:

Protein score is  $-10 \cdot \log(P)$ , where P is the probability that the observed match is a random event.  
Protein scores greater than 73 are significant ( $p < 0.05$ ).

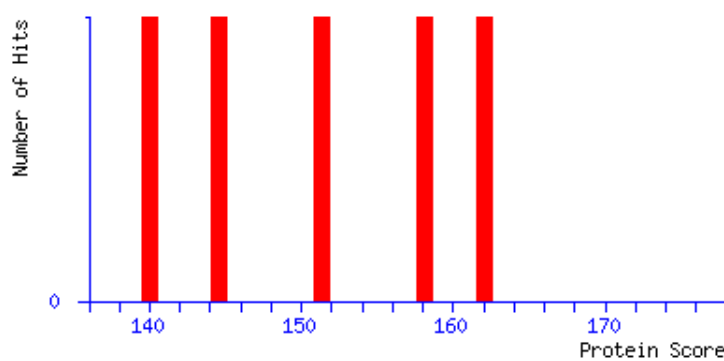

Matched peptide sequences: shown in **Bold red**:

**1 MQIFVKTLTG KTITLEVESS DTIDNVKAKI QDKEGIPPDQ QRLIFAGKQL**  
**51 EDGRTLADYN IQKESTLHLV LRLRG**

Band No.: [B33](#)

NCBI accession No.: [gi|27449246](#) Species: *Hevea brasiliensis*

Protein name: [Cu/Zn superoxide dismutase](#)

Mascot score: [87](#)

Sequence coverage %: [38](#)

Matched peptides No.: [6](#)

Total peptides No.: [22](#)

Calculated Mr: [15726](#)

Calculated pI: [5.73](#)

Probability Based Mowse Score:

Protein score is  $-10 \cdot \log(P)$ , where P is the probability that the observed match is a random event. Protein scores greater than 73 are significant ( $p < 0.05$ ).

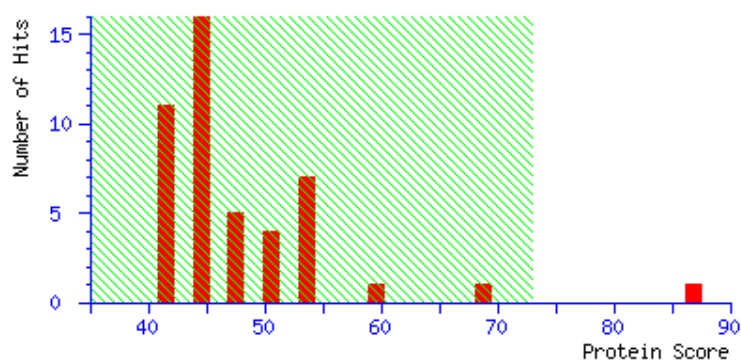

Matched peptide sequences: shown in **Bold red**:

```
1  MLKAVAVITS  SEGISGKIFF  TQEGDGPTTV  TGSVSGLKPG  LHGFHVHTFG
51  DTINGCLSTG  LHFNPASKDH  GGPEDENRHA  GDLGNVNVGD  DGTANFTIVD
101 KHIPLSGPHS  IAGRSVVFHE  GRDDLGRGGH  ELSKITGNAG  DRIACGIIGL
151  QE
```

Band No.: B34

NCBI accession No.: [gi| 29170601](#) Species: *Hevea brasiliensis*

Protein name: [small rubber particle protein](#)

Mascot score: 84 Sequence coverage %: 61

Matched peptides No.: 7 Total peptides No.: 31

Calculated Mr: 12769 Calculated pI: 4.61

Probability Based Mowse Score:

Protein score is  $-10 \cdot \log(P)$ , where P is the probability that the observed match is a random event. Protein scores greater than 73 are significant ( $p < 0.05$ ).

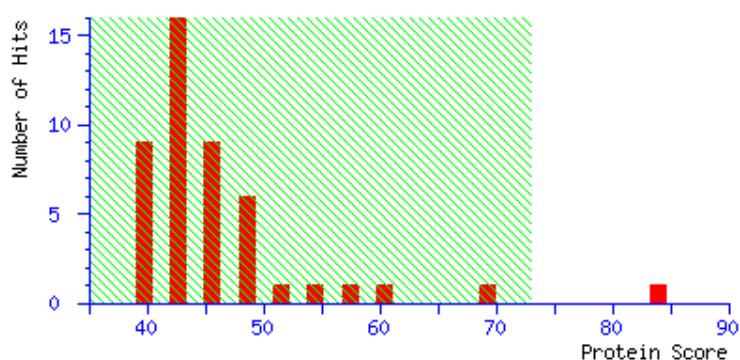

Matched peptide sequences: shown in **Bold red**:

1 MAEGKENENF **QQEANEQEEK** LKYLEFVQAT TDNAVTALSN IYLYAKDNSG  
51 **PLKPGVETIE** **GVAKTVVIPA** SKIPTEAIKF ADRAVDASFT TLQNIVPSVL  
101 **KQLPTQACDT** SVKESAE

Spot No.: B35

NCBI accession No.: gi|242080683 Species: *Sorghum bicolor*

PFF score: [118]

Protein name: hypothetical protein SORBIDRAFT\_07g004260

Matched peptides No.: [2] Sequence coverage %: [15]

Matched sequences: **M.GLQEEFEEYAEK.A; M.GLQEEFEEYAEKAK.T**

Calculated Mr: 10341

Calculated pI: 5.01

Probability Based Mowse Score:

Ions score is  $-10 \cdot \log(P)$ , where P is the probability that the observed match is a random event. Individual ions scores  $> 45$  indicate identity or extensive homology ( $p < 0.05$ ). Protein scores are derived from ions scores as a non-probabilistic basis for ranking protein hits.

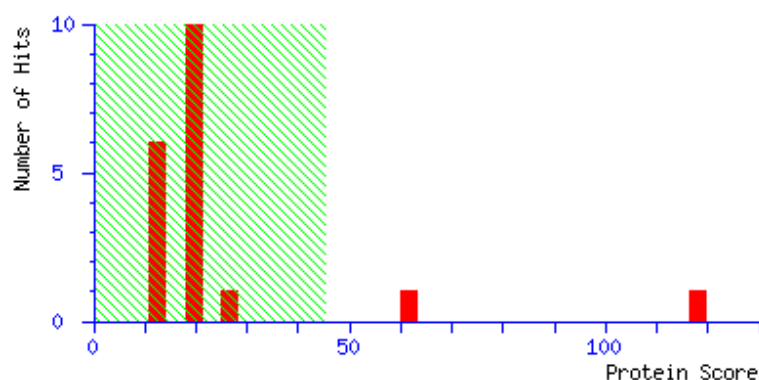

Matched peptide sequences: shown in **Bold Red**:

1 **MGLQEEFEEY AEKAK**TLPES TSNENKLILY GLYKQATVGN VNTDRPGIFY  
51 QKDRAKWDAW KAVEGKPKKE AMNDYITKVK QLQEEAAAAT S



## Supplementary Figure S2

Figure S2:

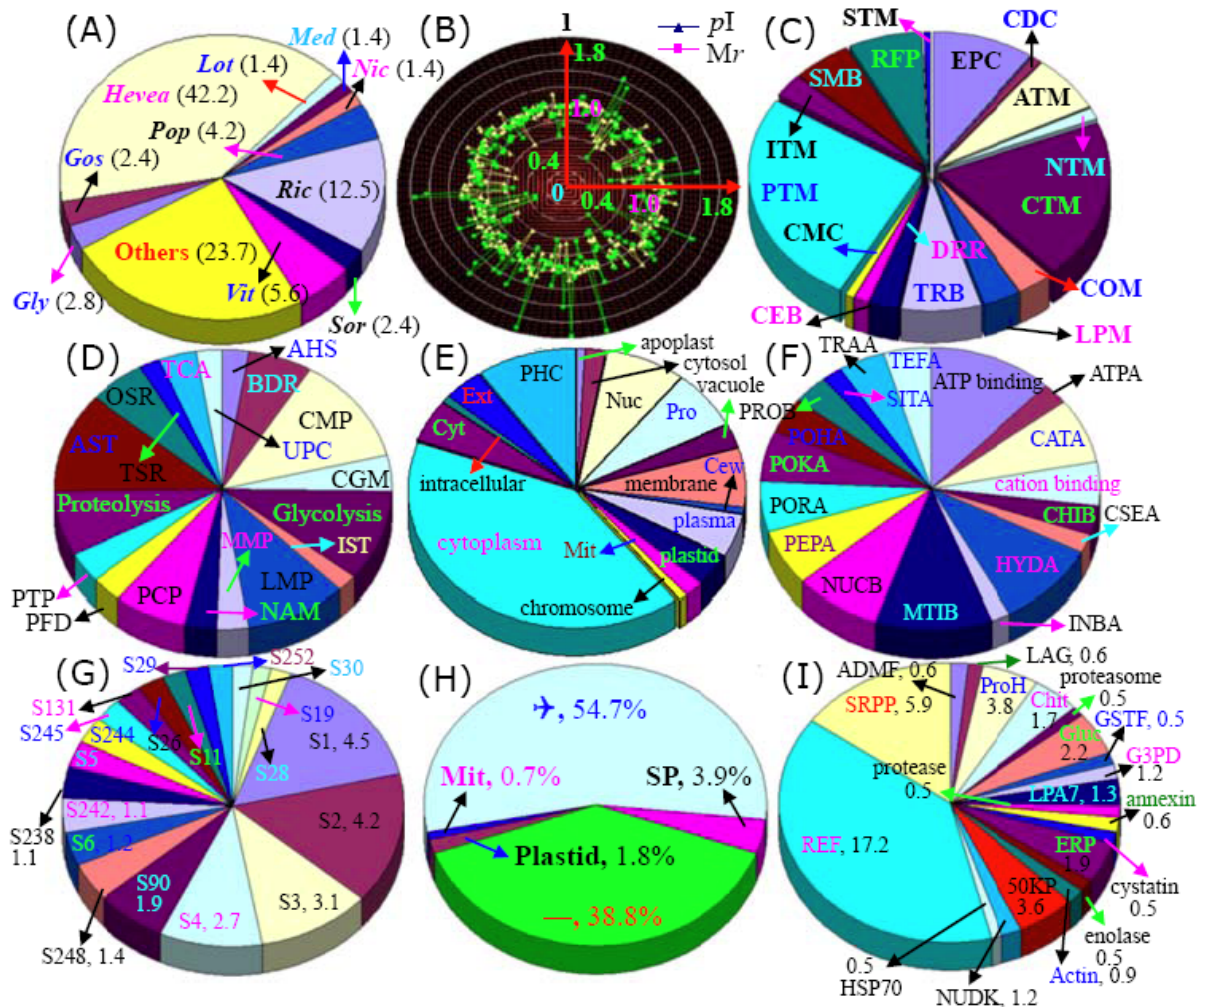

**Figure S2: Classification and functional analysis of the identified main latex proteins.** A total of 287 proteins including 184 unique proteins were positively identified from 252 spots and 35 bands by MS. The distributions of the identified proteins in different plant species were demonstrated (A). To evaluate the quality of identified proteins, the theoretical and experimental ratios of molecular mass ( $M_r$ ) and isoelectric point ( $pI$ ) were calculated and presented in radial chart and annular radar axis labels respectively (B). Then, each protein was functionally classified by COG and the proportion of each functional category was shown (C). The GO classification results including biological process (D), cellular component (E), and molecular function (F) were presented. The cellular locations of all the identified

proteins were also determined by TargetP (H). To detect the protein expression abundance in rubber latex, the most abundant 20 protein spots (G) as well as the most abundant 20 kinds of proteins on the reference 2-DE gel were also determined. The spot number (S), protein name and the volume value (Vol%) in the reference 2-DE gel were presented.

**The abbreviations used in this study were listed as the following.**

**The abbreviations for proteins:**

ABAS, abscisic acid stress ripening-related protein; ACAT, Acetyl-CoA C-acetyltransferase; ACPX, ascorbate peroxidase; ADMF, actin depolymerizing factor; ADPF, actin-depolymerizing factor; APTS, asparaginyl-tRNA synthetase; ATPS, ATP synthase subunit beta; CAMT, caffeic acid 3-O-methyltransferase; CDCP, cell division cycle protein; CDPK, calcium-dependent protein kinase; Chit, chitinase; CIAD, cinnamyl alcohol dehydrogenase; CIBP, citrate-binding protein; CIPT, cis-prenyl transferase; CLBP, calcium lipid binding protein; COPC, COP9 signalosome complex subunit 1; COPT, copper transport protein; CVMP, coated vesicle membrane protein; CYAS, beta-cyanoalanine synthase; CYSP, cysteine protease; DMAPP, dimethylallyl diphosphate; ELRP, elicitor-responsive protein; ETEF, eukaryotic translation elongation factor; ETIF, eukaryotic translation initiation factor; ETHI, ethylene-inducible protein; ETHR, ethylene receptor; FADS, farnesyl diphosphate synthase; GLUD, glutaredoxin; GGCS, gamma-glutamylcysteine synthetase; GGDS, geranylgeranyl diphosphate synthase; Gluc, beta-1,3-glucanase; GLUR, glutathione reductase; GLUS, glutamine synthetase; GSGT, galactinol-sucrose galactosyltransferase; GSTF, glutathione-S-transferase; G3PD, glyceraldehyde 3-phosphate dehydrogenase; G6PD, glucose-6-phosphate dehydrogenase; G6PE, glucose-6-phosphate 1-epimerase; G6PI, glucose-6-phosphate isomerase; HMGR, hydroxymethylglutaryl coenzyme A reductase; HMGS, hHydroxymethylglutaryl coenzyme A synthase; HSP 70, heat shock protein 70; HYDL, hydroxynitrile lyase; LACG, latex cyanogenic beta glucosidase; LACT, latex cystatin; LAP, latex abundant protein; LAG, latex allergen; LPA7, latex protein allergen Hev b 7; MEVD, mevalonate disphosphate decarboxylase; MEVK, mevalonate kinase; MIPS, myo-inositol-1-phosphate synthase; NUDK, nucleoside diphosphate kinase; PDBP, pyridoxal biosynthesis protein; PHOK, phosphomevalonate kinase; PHOT, phosphoglyceride transfer family protei; PMPP, pyrophosphate-energized membrane proton pump; PPCI, peptidyl-prolyl cis-trans isomerase; ProH, prohevein; PROI, protease inhibitor protein; PseuH, pseudo-hevein; RAPK, receptor for activated protein kinase; REF, rubber elongation factor; RRMP, RNA recognition motif-containing protein; SOD, superoxide dismutase; SRPP, small rubber particle protein; SUCT, sucrose transporter; TMAP, translation machinery-associated protein; UBCE, ubiquitin-conjugating enzyme; UBPL,

ubiquitin-protein ligase; VHAE, V-type proton ATPase subunit E; VHAF, V-type proton ATPase subunit; V-PPase, vacuolar-type inorganic pyrophosphatase; 50KP, 50 kDa protein.

**The abbreviations for COG classification of each protein:**

EPC, Energy production and conversion; CDC, Cell division and chromosome partitioning; ATM, Amino acid transport and metabolism; NTM, Nucleotide transport and metabolism; CTM, Carbohydrate transport and metabolism; COM, Coenzyme transport and metabolism; LPM, Lipid metabolism; TRB, Translation, ribosomal structure and biogenesis; DRR, DNA replication, recombination and repair; CMC, Cell envelope biogenesis, outer membrane/ G Carbohydrate transport and metabolism; PTM, Posttranslational modification, protein turnover, chaperones.

**The abbreviations for GO-Biological process:**

AHS, ATP hydrolysis and synthesis; BDR, biotic defense response; CMP, carbohydrate metabolic process; CGM, cellulose biosynthetic and glucose metabolic process; IST, intracellular signal transduction; LMP, lipid metabolic process; MMP, malate metabolic process; NAM, nuclear acid metabolic process; PCP, protein catabolic process; PFD, protein folding; PTP, protein transport; AST, abiotic stress response; OSR, oxidative stress response; TRR, translational regulation; TCA, tricarboxylic acid cycle; UPC, ubiquitin-dependent protein catabolic process.

**The abbreviations for GO-Cellular component:**

Nuc, nucleus; Pro, proteasome; Cew, cell wall; Mit, mitochondria; Cyt, cytoskeleton; Ext, extracellular region; PHC, phosphopyruvate hydratase complex.

**The abbreviations for GO-Molecular function:**

ATPA, ATPase activity; CATA, catalytic activity; CHIB, chitin binding; CSEA, cysteine synthase and endopeptidase activity; HYDA, hydrolase activity; INBA, inhibitor activity; MTIB, metal ion binding; NUCB, nucleotide binding; PEPA, peptidase activity; PORA, peroxidase and reductase activity; POKA, phosphate kinase activity; POHY, phosphopyruvate hydratase activity; PROB, protein binding; SITA, signal transducer activity; TRAA, transferase activity; TEFA, translation elongation factor activity.

**The abbreviations for the cellular location in TargetP:**

Mit, Mitochondrion, i.e. the sequence contains mTP, a mitochondrial targeting peptide; Plastid, Chloroplast or other plastids, i.e. the sequence contains cTP, a chloroplast transit peptide; \_, Any other location; Q, Don't know location, indicates that cutoff restrictions were set and the winning network output score was below the requested cutoff for that category; SP, Secretory pathway, i.e. the sequence contains SP, a signal peptide.

## Supplementary Figure S3

Supplemental spectra and MALDI TOF/TOF MS  
/MS identification information for the ethylene  
responsive latex proteins

Annotated spectra [143](#) differential latex proteins on DIGE gels  
identified by PMF and the combination results of PMF and  
PFF.

CID: collision induced desorption;

MALDI TOF:

matrix assisted laser desorption/ionization time of flight;

MS: mass spectrometry;

PMF: peptide mass fingerprinting;

PFF: peptide fragment fingerprinting.

Spot No.: **D1**

NCBI accession No.: **gi|255545912** Species: *Ricinus communis*

**PFF** score: **[278]**

Protein name: **14-3-3 protein, putative**

Matched peptides No.: **[3]** Sequence coverage %: **[17]**

Matched sequences: **R.IVSSIEQKEEGR.K;**

**K.LVLGSTPSGELTVEER.N;**

**K.AAQDIALADLAPTHPIR.L**

Calculated Mr: **28647**

Calculated pI: **4.71**

### Probability Based Mowse Score:

Ions score is  $-10 \cdot \log(P)$ , where P is the probability that the observed match is a random event. Individual ions scores  $> 46$  indicate identity or extensive homology ( $p < 0.05$ ). Protein scores are derived from ions scores as a non-probabilistic basis for ranking protein hits.

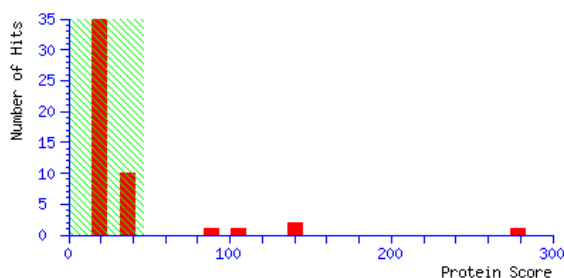

Matched peptide sequences: shown in **Bold Red**:

```
1  MAAAATVPDN  LTRDQYVYLA  KLAEQAERYE  EMVQFMQKLV  LGSTPSGELT
51 VEERNLLSVA  YKNVIGSLRA  AWRIIVSSIEQ  KEEGRKNEEH  VVLVKEYRSK
101 VENELSDVCA  SILSLLDSNL  IPSASASESK  VFYLMKMGDY  HRYLAEFKAG
151 DERKTAAEDT  MLAYKAAQDI  ALADLAPTHP  IRLGLALNFS  VFYYEILNQS
201 DKACSMKQA  FEEAIAELDT  LGEESYKDST  LIMQLLRDNL  TLWTSQVQDQ
251 LDEP
```

Spot No.: **D2**

NCBI accession No.: **gi|37719658** Species: *Hevea brasiliensis*

Protein name: **50 kDa protein**

Mascot score: **93**

Sequence coverage %: **31**

Matched peptides No.: **9**

Total peptides No.: **33**

Calculated Mr: **41480**

Calculated pI: **4.60**

Probability Based Mowse Score:

Protein score is  $-10 \cdot \log(P)$ , where P is the probability that the observed match is a random event. Protein scores greater than 73 are significant ( $p < 0.05$ ).



Matched peptide sequences: shown in **Bold Red**:

```
1 MASLAYSLEFI LSLFTFTLLN PVCSELDEYL FSFGDGLYDA GNAKFIYPDK
51 YLPSYHHPYG TTFDYPTGR FSDGRTVVDF VAENVSLPRI PPFKNKEANF
101 TYGANFASEG ATASDSNPLI DFRSQIRDFG ELKLEWAVQL VNVTELARRL
151 KKAVYLISFG ADDYLNIEIP SEASREQLES IVDVVLGNIS DRIKELYDFG
201 ARKFVVENVA PLGLIPFIKQ TSDNSTLFYE LASLHAMKLP QILEKIQDGY
251 LFPEFNITVF NYFGIIEII DAPGEHGFKY GDIACCGNST YRGQACGFLD
301 YEFVCVGNKT EYLFFDGTHN TDAANLLAE LMWDKESGFI SPYGVKDFFP
351 SPTTIQTLLT EATALG
```

Spot No.: **D3**

NCBI accession No.: **gi|37719658** Species: *Hevea brasiliensis*

Protein name: **50 kDa protein**

Mascot score: **93**

Sequence coverage %: **36**

Matched peptides No.: **11**

Total peptides No.: **44**

Calculated Mr: **41480**

Calculated pI: **4.60**

Probability Based Mowse Score:

Protein score is  $-10 \cdot \log(P)$ , where P is the probability that the observed match is a random event. Protein scores greater than 73 are significant ( $p < 0.05$ ).



Matched peptide sequences: shown in **Bold Red**:

```
1 MASLAYSLEFI LSLFTFTLLN PVCSELDEYL FSFGDGLYDA GNAKFIYPDK
51 YLPSYHHPYG TTFFDYPTGR FSDGRTVVDF VAENVSLPRI PPFKNKEANF
101 TYGANFASEG ATASDSNPLI DFRSQIRDFG ELKLEWAVQL VNVTELARRL
151 KKAVYLISFG ADDYLNIEIP SEASREQLS IVDVVLGNIS DRIKELYDFG
201 ARKFVVENVA PLGLIPFIKQ TSDNSTLFYE LASLHAMKLP QILEKIQDGY
251 LFPEFNYTVF NYFGIIEII DAPGEHGFKY GDIACCGNST YRGQACGFLD
301 YEFVCVGNKT EYLFFDGTHN TDAANNLLAE LMWDKESGFI SPYGVKDFFP
351 SPTTIQTLT EATALG
```

Spot No.: **D4**

NCBI accession No.: **gi|147805616** Species: *Vitis vinifera*

**PFF** score: **[324]**

Protein name: **hypothetical protein VITISV\_028800**

Matched peptides No.: **[4]** Sequence coverage %: **[14]**

Matched sequences: **R.GPYPADQVVR.D;**

**K.GCFFTTSGGLR.S;**

**R.DRGPYPADQVVR.D;**

**K.TANEVIIVIEAYR.T**

Calculated Mr: **27385**

Calculated pI: **5.64**

Probability Based Mowse Score:

Ions score is  $-10 \cdot \log(P)$ , where P is the probability that the observed match is a random event. Individual ions scores  $> 46$  indicate identity or extensive homology ( $p < 0.05$ ). Protein scores are derived from ions scores as a non-probabilistic basis for ranking protein hits.

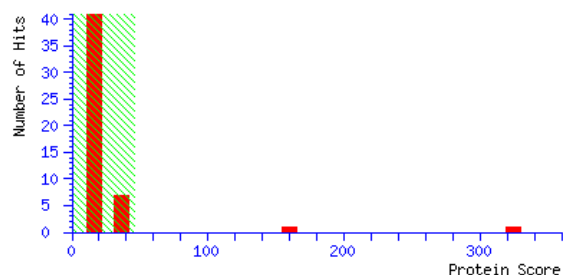

Matched peptide sequences: shown in **Bold Red**:

```
1  MLAVFHKSIA  EAPEGLRTPD  SASLPALKDG  FLPQFFASLH  PSAVTVNLGS
51  SGAISYSVDK  QNPLLPRLFA  VVDDIFCLFQ  GHIENVALLK  QQYGLNKTAN
101 EVIIVIEAYR  TLRDRGPYPA  DQVVRDLHGK  FAFVLYDSSN  RTAFLAADAD
151  ESVPFFWGVD  SEGHLVLSDD  EETVKKGCGK  SFAPFPKGCF  FTTSGGLRSF
201  EHPLNELRAE  PRVDSSGQVC  GANFKVDVEA  KKETGMPRVG  SAANWSTHY
```



Spot No.: **D5**

NCBI accession No.: **gi|224137430**

Species: *Populus trichocarpa*

Protein name: **predicted protein**

**PFF score: [122]**

Matched peptides No.: **[2]**

Sequence coverage %: **[6]**

Matched sequences: **R.VYKDG TIER.L;**

**R.LLVIVA EK DILR.D**

Calculated Mr: **35782**

Calculated pI: **5.30**

### Probability Based Mowse Score:

Ions score is  $-10 \cdot \log(P)$ , where P is the probability that the observed match is a random event. Individual ions scores  $> 45$  indicate identity or extensive homology ( $p < 0.05$ ). Protein scores are derived from ions scores as a non-probabilistic basis for ranking protein hits.

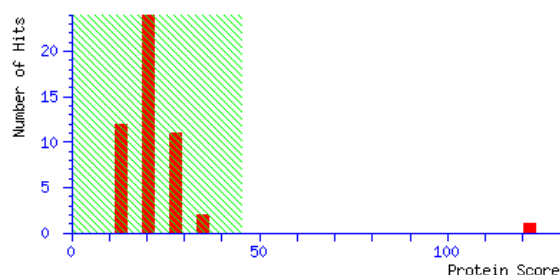

Matched peptide sequences: shown in **Bold Red**:

```
1 MDQSKEIARD VFPFLRVYKD GTIERLAGTE VSHAGLDPET GVLSKDTVIV
51 PETGVSARLY RPNSAKGNRK LPLVIYYHGG GFFISSAADP KYHNSLNRLV
101 AEANIVLVSV DYRIAPENPL PAAYDDSWAA LQWVA AHAKE DGGSEAWLKD
151 YVDFGRVFLA GDSCGANVAH HFALKLKDCE LGHQINIQA I AMIFPYFWGK
201 DFIGVEVTDQ ARKSMVDNWW LLVCPSEKGC DDPLINPFAD GSPSLES LAC
251 KRLLVIVA EK DILRDRGRLY YEKMVNSEWQ GTAEFMEVQG EDHVFHIHNP
301 DCENAKSMFK GLASFINQA
```

Spot No.: D6

NCBI accession No.: [gi|14423688](#) Species: *Hevea brasiliensis*

PFF score: [229] Protein name: Enolase 1

Matched peptides No.: [3] Sequence coverage %: [10]

Matched sequences: [R.AGWGVMASHR.S + Oxidation \(M\)](#);

[R.AAVPSGASTGIYEALRLR.D](#);

[R.IEEELGSEAVYAGANFR.K](#)

Calculated Mr: 48029

Calculated pI: 5.57

### Probability Based Mowse Score:

Ions score is  $-10 \cdot \log(P)$ , where P is the probability that the observed match is a random event. Individual ions scores > 45 indicate identity or extensive homology ( $p < 0.05$ ). Protein scores are derived from ions scores as a non-probabilistic basis for ranking protein hits.

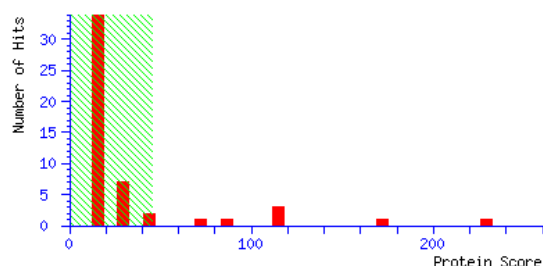

Matched peptide sequences: shown in **Bold Red**

```
1  MAITIVSVRA  RQIFDSRGNP  TVEADVKLSD  GYLARAAVPS  GASTGIYEAL
51  ELRDGGSDYL  GKGVSKAVEN  VNIIIGPALV  GKDPTDQVGI  DNFMVQQLDG
101 TVNEGWCKQ  KLGANAILAV  SLAVCKAGAH  VKGIPLYEHI  ANLAGNKNLV
151 LPVPAFNVIN  GGSHAGNKLA  MQEFMILPVG  ASSFKEAMKM  GAEVYHHLKS
201 VIKKKYQDA  TNVGDEGGFA  PNIQENKEGL  ELLKTAIAKA  GYTGKVVIGM
251 DVAASEFYGS  DQTYDLNFKE  ENNGSQKIS  GEALKDLYKS  FVAEYPIVSI
301 EDPFDQDDWA  HYAKLTSEIG  EKVQIVGDDL  LVTNPKRVEK  AIKEKACNAL
351 LLKVNQIGSV  TESIEAVKMS  KRAGWGMAS  HRSGETEDTF  IADLSVGLAT
401 GQIKTGAPCR  SERLAKYNQL  LRIEEELGSE  AVYAGANFRK  PVEPY
```

Spot No.: **D7**

NCBI accession No.: **gi|37719658** Species: *Hevea brasiliensis*

Protein name: **50 kDa protein**

Mascot score: **95**

Sequence coverage %: **42**

Matched peptides No.: **14**

Total peptides No.: **66**

Calculated Mr: **41480**

Calculated pI: **4.60**

Probability Based Mowse Score:

Protein score is  $-10 \cdot \log(P)$ , where P is the probability that the observed match is a random event. Protein scores greater than 73 are significant ( $p < 0.05$ ).



Matched peptide sequences: shown in **Bold Red**:

```
1 MASLAYSLEFI LSLFTFTLLN PVCSELDEYL FSFGDGLYDA GNAKFIYPDK
51 YLPSYHHPYG TTFDYPTGR FSDGRTVVDF VAENVSLPRI PPFKNKEANF
101 TYGANFASEG ATASDSNPLI DFRSQIRDFG ELKLEWAVQL VNVTELARRL
151 KKAVYLISFG ADDYLYNEIP SEASREQLES IVDVVLGNIS DRIKELYDFG
201 ARKFVVENVA PLGLIPFIKQ TSDNSTLFYE LASLHAMKLP QILEKIQDGY
251 LFPEFNYTVF NYFGIIEKII DAPGEHGFKY GDIACCGNST YRGQACGFLD
301 YEFVCVGNKT EYLFFDGTHN TDAANLLAE LMWDKESGFI SPYGVKDFFP
351 SPTTIQTLT EATALG
```

Spot No.: **D8**

NCBI accession No.: **gi|255565836** Species: *Ricinus communis*

Protein name: eukaryotic translation elongation factor, putative

Mascot score: **123**

Sequence coverage %: **30**

Matched peptides No.: **26**

Total peptides No.: **56**

Calculated Mr: **94981**

Calculated pI: **5.87**

Probability Based Mowse Score:

Protein score is  $-10 \cdot \log(P)$ , where P is the probability that the observed match is a random event. Protein scores greater than 72 are significant ( $p < 0.05$ ).

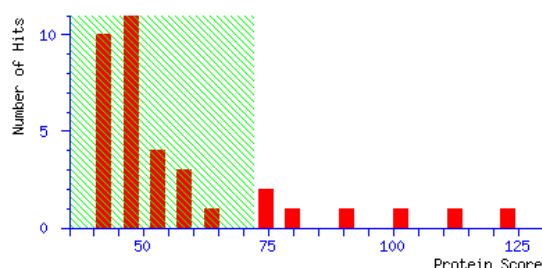

Matched peptide sequences: shown in **Bold Red**

```
1  MVKFTAEELR RIMDYKHNIR NMSVIAHVDH GKSTLTDSLV AAAGIIAQEV
51  AGDVRMTDTR QDEAERGITI KSTGISLYE MTDEALKSFK GERQGNEYLI
101 NLIDSPGHVD FSSEVTAALR ITDGALVVVD CIEGVCVQTE TVLRQALGER
151 IRPVLTVNKM DRCFLELQVD GEEAYQTFSR VIENANVIMA TYEDPLLGDC
201 QVYPEKGTVA FSAGLHGWAF TLINFAKMYA SKFGVDESKM MERLWGENFF
251 DPATKKWTSK NTGSPTCKRG FVQFCYEPIK QIINTCMNDQ KDKLWPLQK
301 LGVTMKSDEK ELMGKALMKR VMQTWLPASS ALLEMMIFHL PSPAKAQRYR
351 VENLYEGPLD DPYATAIRNC DPEGPLMLYV SKMIPASDKG RFFAFGRVFA
401 GKVSTGLKVR IMGPNYVPGE KKDLYVKSVQ RTVIWMGKKQ ETVEDVPCGN
451 TVALVGLDQF ITKNATLTNE KEVDAHPIRA MKFSVSPVVR VAVQCKVASD
501 LPKLVEGLKR LAKSDPMVVC TIESGEHII AGAGELHLEI CLKDLQDDFM
551 GGAEIIKSDP VVSFRETVLE KSCRVVMSKS PNKHNRLYME ARPMEEGLAE
601 AIDEGRIGPR DDPKARAKIL SEEFGWDKDL AKKIWCFGPE TTGPNMVVDM
651 CKGVQYLNEI KDSVVAGFQW ASKEGALAEE NMRGICFEVC DVVLHADAIH
701 RGGGQVIPTA RRVIYASQLT AKPRLLEPVY LVEIQAPEQA LGGIYSVLNQ
751 KRGHVFEELQ RPGTPLYNIK AYLPVIESFG FSGTLRAATS GQAFPQCVFD
801 HWDMMSSDPM EPGSQAANLV TEIRKRKGLK EQMTPLSEFE DKL
```

Spot No.: **D9**

NCBI accession No.: **gi|225428086** Species: *Vitis vinifera*

Protein name: **PREDICTED: V-type proton ATPase subunit B 1**

Mascot score: **146**

Sequence coverage %: **52**

Matched peptides No.: **29**

Total peptides No.: **52**

Calculated Mr: **54367**

Calculated pI: **5.04**

### Probability Based Mowse Score:

Protein score is  $-10 \cdot \log(P)$ , where P is the probability that the observed match is a random event. Protein scores greater than 73 are significant ( $p < 0.05$ ).

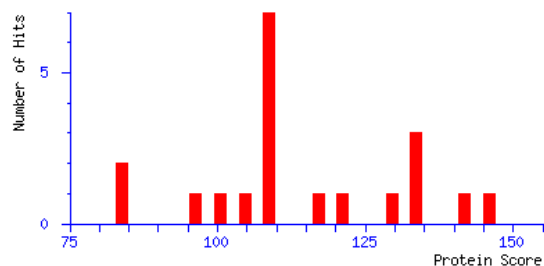

Matched peptide sequences: shown in **Bold Red**

```
1  MGVEQNNHDA  EEGTLLVGME  YRTVSGVAGP  LVILEKVKGP  KYQEIVNIRL
51  GDGTTRRGQV  LEVDGEKAVV  QVFEGTSGID  NKYTTVQFTG  EVLKTFPVSLD
101 MLGRIFNGSG  KPIDNGPPIL  PEAYLDISGS  SINPSERTYP  EEMIQTGIST
151 IDVMNSIARG  QKIPLFSAAG  LPHNEIAAQI  CRQAGLVKRL  EKSGSLLEDV
201  EEDNFAIVFA  AMGVNMETAQ  FFKRDFEENG  SMERVTLFLN  LANDPTIERI
251  ITPRIALTTA  EYLAYECGKH  VLVILDMSS  YADALREVSA  AREEVPGRRG
301  YPGYMYTDLA  TIYERAGRIE  GRKGSITQIP  ILTMPNDDIT  HPTPDLTGYI
351  TEGQIYIDRQ  LHNRQIYPPI  NVLPSLSRLM  KSAIGEGMTR  RDHADVSNQL
401  YANYAIGKDV  QAMKAVVGEE  ALSSDLLYL  EFLDKFERKF  VAQGAYDTRN
451  IFQSLDLAWT  LLRIFPRELL  HRIPAKTLDQ  YYSREASN
```

Spot No.: **D10**

NCBI accession No.: **gi| 2832430** Species: *Hevea brasiliensis*

**PFF** score: **[446]**

Protein name: **Pro-hevein**

Matched peptides No.: **[4]**

Sequence coverage %: **[32]**

Matched sequences: **K.YGWTAFCGPVGAHGQPS**CGK.C; **K.CLSVTNTGTGAK**.A;  
**R.IVDQCSNGGLDLDVNVFR**.Q; **R.QLDTDGKGYER**.G

Calculated Mr: **20852**

Calculated pI: **5.65**

Probability Based Mowse Score:

Ions score is  $-10 \cdot \log(P)$ , where P is the probability that the observed match is a random event. Individual ions scores  $> 45$  indicate identity or extensive homology ( $p < 0.05$ ). Protein scores are derived from ions scores as a non-probabilistic basis for ranking protein hits.

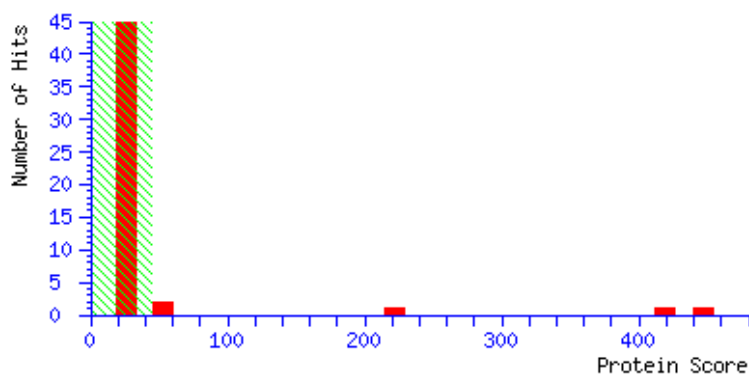

Matched peptide sequences: shown in **Bold Red**:

```
1  EQCGRQAGGK LCPNNLCCSQ WGWCGSTDEY CSPDHNCQSN CKDSGEGVGG
51  GSASNVLATY HLYNSQDHGW DLNAASAYCS TWDANKPYSW RSKYGWTAFC
101 GPVGAHGQPS CGKCLSVTNT GTGAKATVRI VDQCSNGGLD LDVNVFRQLD
151 TDGKGYERGH LTVNYQFVDC GDSFNPLFSV MKSSVIN
```

Spot No.: **D11**

NCBI accession No.: **gi|123062** Species: *Hevea brasiliensis*

**PFF** score: **[158]**

Protein name: **Pro-hevein**

Matched peptides No.: **[2]** Sequence coverage %: **[11]**

Matched sequences: **K.CLSVTNTGTGAK.T;**  
**R.QLDTDGKGYER.G**

Calculated Mr: **22700**

Calculated pI: **5.63**

### Probability Based Mowse Score:

Ions score is  $-10 \cdot \log(P)$ , where P is the probability that the observed match is a random event. Individual ions scores  $> 45$  indicate identity or extensive homology ( $p < 0.05$ ). Protein scores are derived from ions scores as a non-probabilistic basis for ranking protein hits.

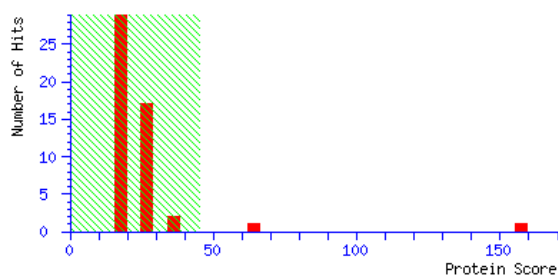

Matched peptide sequences: shown in **Bold Red**:

```
1  MNIFIVVLLC  LTGVAIAEQC  GRQAGGKLCF  NNLCCSQWGW  CGSTDEYCSP
51 DHNCQSNCKD  SGEGVGGGSA  SNVLATYHLY  NSQDHGWDLN  AASAYCSTWD
101 ANKPYSWRSK  YGWTAFCGPV  GAHGQSSCGK  CLSVTNTGTG  AKTTVRIVDQ
151 CSNGGLDLDV  NVERQLDTDG  KGYERGHITV  NYQFVDCGDS  FNPLFSVMKS
201 SVIN
```

Spot No.: **D12**

NCBI accession No.: **gi|15237159** Species: *Arabidopsis thaliana*

**PFF** score: **[77]**

Protein name: **regulatory particle triple-A ATPase 3**

Matched peptides No.: **[4]** Sequence coverage %: **[13]**

Matched sequences: **K.AVANHTTAAFIR.V;**

**K.KPDTDFEFYK.-;**

**R.EAVELPLTHHELYK.Q;**

**K.ENAPAIIFIDEVDAIATAR.F**

Calculated Mr: **45894**

Calculated pI: **5.42**

Probability Based Mowse Score:

Ions score is  $-10 \cdot \log(P)$ , where P is the probability that the observed match is a random event. Individual ions scores  $> 46$  indicate identity or extensive homology ( $p < 0.05$ ). Protein scores are derived from ions scores as a non-probabilistic basis for ranking protein hits.

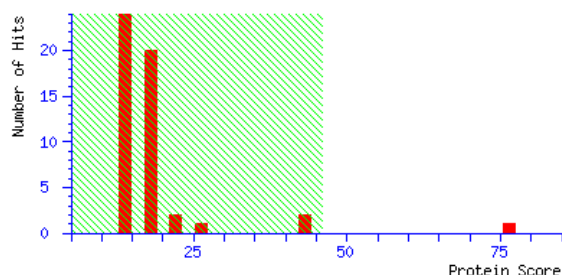

Matched peptide sequences: shown in **Bold Red**:

```
1  MASAAVASMV  LDPKASPALM  DLSTADEEDL  YGRLKSLERQ  LEFTDIQEEY
51  VKDEQKNLKR  ELLRAQEEVK  RIQSVPLVIG  QFMEMVDQNN  GIVGSTTGSN
101  YYVRILSTIN  RELLKPSASV  ALHRHSNALV  DVLPPPEADSS  ISLLSQSEKP
151  DVSYNDIGGC  DIQKQEIREA  VELPLTHHEL  YKQIGIDPPR  GVLlyGPPGT
201  GKTMLAKAVA  NHTTAAFIRV  VGSEFVQKYL  GEGPRMVRDV  FRLAKENAPA
251  IIFIDEVDAI  ATARFDAQTG  ADREVQRILM  ELLNQMDGFD  QTVNVKVIMA
301  TNRADTLDPA  LLRPGRDRK  IEFPLPDRRQ  KRLVFQVCTS  KMNLSDEVDL
351  EDYVSRPDKI  SAAEIAAICQ  EAGMHA VRKN  RYVILPKDFE  KGYRANVKKP
401  DTDFEFYK
```



Spot No.: **D13**

NCBI accession No.: **gi|123062** Species: *Hevea brasiliensis*

**PFF** score: **[129]**

Protein name: **Pro-hevein**

Matched peptides No.: **[1]**

Sequence coverage %: **[8]**

Matched sequences: **R.IVDQCSNGGLDLDVNVFR.Q**

Calculated Mr: **22700**

Calculated pI: **5.63**

### Probability Based Mowse Score:

Ions score is  $-10 \cdot \log(P)$ , where P is the probability that the observed match is a random event. Individual ions scores  $> 45$  indicate identity or extensive homology ( $p < 0.05$ ). Protein scores are derived from ions scores as a non-probabilistic basis for ranking protein hits.

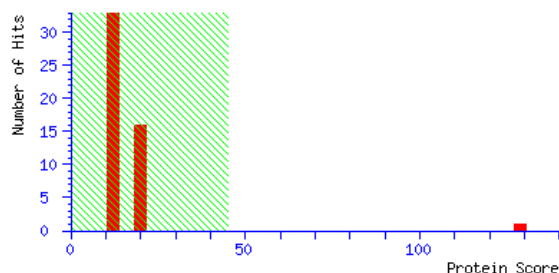

Matched peptide sequences: shown in **Bold Red**:

```
1  MNIFIVLLC  LTGVAIAEQC  GRQAGGKLCF  NNLCCSQWGW  CGSTDEYCSP
51  DHNCQSNCKD  SGEVGGGSA  SNVLATYHLY  NSQDHGWDLN  AASAYCSTWD
101 ANKPYSWRSK  YGWTAFCGPV  GAHQSSCGK  CLSVTNTGTG  AKTTVRIVDQ
151 CSNGGLDLDV NVFRQLDIDG  KGYERGHITV  NYQFVDCGDS  FNPLFSVMKS
201  SVIN
```

Spot No.: **D14**

NCBI accession No.: **gi|225446010** Species: *Vitis vinifera*

**PFF** score: **[196]**

Protein name: **putative glucose-6-phosphate 1-epimerase**

Matched peptides No.: **[4]** Sequence coverage %: **[14]**

Matched sequences: **R.VALGPGGDLMLTSR.I;**

**R.VALGPGGDLMLTSR.I + Oxidation (M);**

**K.DGLPDAVVWNPWDKK.A;**

**R.VEGLETLDYLDNLQNK.E**

Calculated Mr: **35638**

Calculated pI: **5.75**

Probability Based Mowse Score:

Ions score is  $-10 \cdot \log(P)$ , where P is the probability that the observed match is a random event. Individual ions scores  $> 46$  indicate identity or extensive homology ( $p < 0.05$ ). Protein scores are derived from ions scores as a non-probabilistic basis for ranking protein hits.

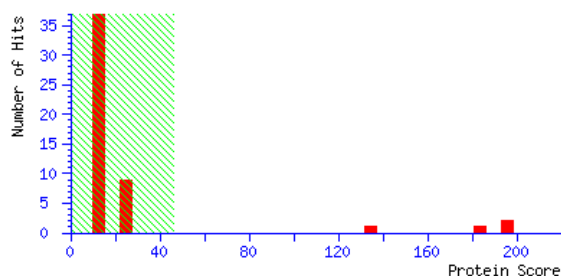

Matched peptide sequences: shown in **Bold Red**:

```
1  MSSERVPVEL  CKGINGLEKV  VLREVRGSSA  EVYLYGGQVT  SWKNDHGEEL
51  LfvSSKAIFK  PPKAIRGGIP  ICFPQFGNHG  SLEQHGfARN  RVWSIDVDPP
101 PFPTNTSSRA  FIDLILKPSE  EDMKIWPHSY  EFRLRVALGP  GGDLMLTSRI
151 RNTSTEGKPL  TTFAYHTYF  SVSDISEVRV  EGLETLDYLD  NLQNKERFTE
201 QGDAITFESE  VDKIYVSTPT  KIAILDHEKK  RTFVIRKDGL  PDAVVWNPWD
251 KKAKAMADFG  DDEYKHMLCV  EAAAVEKPIT  LKPGEEWRGR  QELSAVPSSY
301 CSGQLDPQKV  LQCS
```

Spot No.: **D15**

NCBI accession No.: **gi|1143427** Species: *Cucumis sativus*

**PFF** score: **[338]** Protein name: **heat shock protein 70**

Matched peptides No.: **[5]** Sequence coverage %: **[8]**

Matched sequences: **K.DIDEVILVGGSTR.I;**

**K.QFAAEEISAQVLR.K;**

**K.AVVTVPAYFNDSQR.T;**

**K.LSFKDIDEVILVGGSTR.I;**

**K.KQDITITGASTLPSDEVER.M**

Calculated Mr: **75480**

Calculated pI: **5.15**

### Probability Based Mowse Score:

Ions score is  $-10 \cdot \log(P)$ , where P is the probability that the observed match is a random event. Individual ions scores  $> 45$  indicate identity or extensive homology ( $p < 0.05$ ). Protein scores are derived from ions scores as a non-probabilistic basis for ranking protein hits.

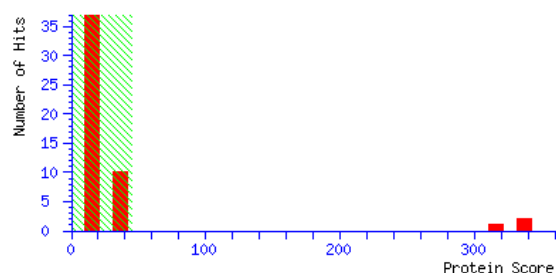

Matched peptide sequences: shown in **Bold Red**:

```
1  MGASTAQIHG  LGAPSFAAAS  MRKSNNVSSR  SVFFGQKLG  N  SSAFPAAAF  L
51  NLRNNTSRRN  SSVRPLRIVN  EKVVGIDLGT  TNSAVAAMEG  GKPTIVTNAE
101 GQRITPSVVA  YTKNGDRLVG  QIAKRQAVVN  PENTFFSVKR  FIGRKMSEVD
151 EESKQVSYRV  ERDENG NVKL  ECPAIGQFA  AEEISAQVLR  KLVDDASKFL
201 NDKVTKAVVT  VPAYFNDSQR  TATKDAGRIA  GLEVLRIINE  PTAASLAYGF
251 EKKSNETILV  FDLGGGTFDV  SVLEVGDGVF  EVLSTSGDTH  LGGDDDFDKRI
301 VDWLAANFKR  DEGIDLLKDK  QALQRLTETA  EKAKMELSSL  TQANISLPFI
351 TATADGPKHI  ETTITRAKFE  ELCSDLLDRL  KTPVENSLRD  AKLSFKDIDE
401 VILVGGSTRI  PAVQELVKKM  TGKEPNVTVN  PDEVVALGAA  VQAGVLAGDV
451 SDIVLLDVSP  LSLGLETGG  VMTKIIPRNT  TLPTSKSEVF  STAADGQTSV
501 EINVLQGERE  FVRDNKSLGS  FRLDGIPPAP  RGV PQIEVKF  DIDANGILSV
551 TAIDKSGGK  QDITITGAST  LPSDEVERMV  SEADKFAKED  KEKRDAIDTK
601 NQADSVVYQT  EKQLKELGDK  VPGPVKEKVE  SKLGELKEAI  SGGSTEAIKE
651 AMAALNQEVM  QLGQSLYNQP  GAGAAPGPGA  SSES GPSEST  GKGPEGDVID
701 ADFS DSK
```

Spot No.: **D16**

NCBI accession No.: **gi|255558037** Species: *Ricinus communis*

**PFF** score: **[198]**

Protein name: **nucleic acid binding protein, putative**

Matched peptides No.: **[2]** Sequence coverage %: **[9]**

Matched sequences: **K.HQFTSTATSK.V;**

**R.YVLTGASWVTGAFNR.V**

Calculated Mr: **67285**

Calculated pI: **5.36**

Probability Based Mowse Score:

Ions score is  $-10 \cdot \log(P)$ , where P is the probability that the observed match is a random event. Individual ions scores  $> 46$  indicate identity or extensive homology ( $p < 0.05$ ). Protein scores are derived from ions scores as a non-probabilistic basis for ranking protein hits.

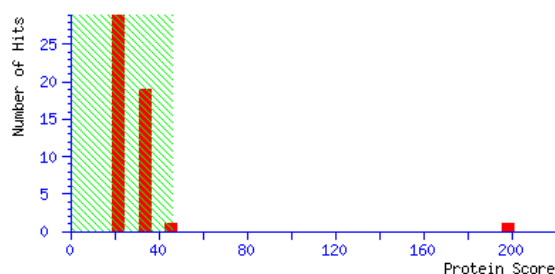

Matched peptide sequences: shown in **Bold Red**:

```
1 MAITTVKVSN VSLGATEQDI KEFFSFSGDI DYVELLDGNE RSQIAYVTFK
51 DQQGAETAVL LSGATIVDQS VTIELAPDYK LPAAASVPTT ATESSSTASGA
101 ESAFQKAEDI VSSMLAKGFI LGKDAVNKAK AFDEKHQFTS TATSKVASLD
151 EKIGLTEKIS AGTTLVNDKV REVDEKFRVS ETTKSAFAAA EQTVSNAGSA
201 IMKNRYVLTG ASWVTGAFNR VAKAAGEVGQ KTKEKVLAE EQNQVAEGYT
251 QIHGTDSPNM SEQMSKSSH
```

Spot No.: **D17**

NCBI accession No.: **gi|27449246** Species: *Hevea brasiliensis*

**PFF** score: **[105]** Protein name: **heat shock protein 70**

Matched peptides No.: **[3]** Sequence coverage %: **[23]**

Matched sequences: **K.DHGGPEDENR.H;**

**K.HIPLSGPHSIAGR.S;**

**R.SVVFHEGRDDLK.G**

Calculated Mr: **15726**

Calculated pI: **5.73**

### Probability Based Mowse Score:

Ions score is  $-10 \cdot \log(P)$ , where P is the probability that the observed match is a random event. Individual ions scores  $> 46$  indicate identity or extensive homology ( $p < 0.05$ ). Protein scores are derived from ions scores as a non-probabilistic basis for ranking protein hits.

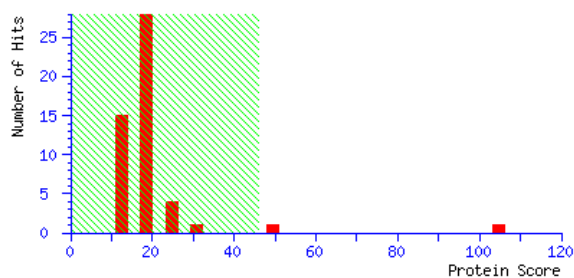

Matched peptide sequences: shown in **Bold Red**:

```
1  MLKAVAVITS  SEGISGKIFF  TQEGDGPTTV  TGSVSGLKPG  LHGFHVHTFG
51  DTTNGCLSTG  LHFNPASKDH  GGPEDENRHA  GDLGNVNVGD  DGTANFTIVD
101 KHIPLSGPHS IAGRSVVFHE GRDDLKGGH  ELSKITGNAG  DRIACGIIGL
151  QE
```

Spot No.: **D18**

NCBI accession No.: **gi|2832430** Species: *Hevea brasiliensis*

**PFF** score: **[446]** Protein name: **prohevein**

Matched peptides No.: **[4]** Sequence coverage %: **[32]**

Matched sequences: **K.CLSVTNTGTGAK.A;**

**R.QLDTDGKGYER.G;**

**R.IVDQCSNGGLDLVDNVFR.Q;**

**K.YGWTAFCGPVGAGHQPCGK.C**

Calculated Mr: **20852**

Calculated pI: **5.64**

### Probability Based Mowse Score:

Ions score is  $-10 \cdot \log(P)$ , where P is the probability that the observed match is a random event. Individual ions scores  $> 46$  indicate identity or extensive homology ( $p < 0.05$ ). Protein scores are derived from ions scores as a non-probabilistic basis for ranking protein hits.



Matched peptide sequences: shown in **Bold Red**:

```
1  EQCGRQAGGK LCPNNLCCSQ WGWCGSTDEY CSPDHNCQSN CKDSGEGVGG
51  GSASNVLATY HLYNSQDHGW DLNAASAYCS TWDANKPYSW RSKYYGWTAFC
101 GPVGAHGQPS CGRCLSVTNT GTGAKATVRI VDQCSNGGLD LDVNVFRQLD
151 TDGKGYERGH LTVNYQFVDC GDSFNPLFSV MKSSVIN
```

Spot No.: **D19**

NCBI accession No.: **gi|255551408** Species: *Ricinus communis*

**PFF** score: **[301]**

Protein name: **chaperonin containing t-complex protein 1**

Matched peptides No.: **[6]** Sequence coverage %: **[14]**

Matched sequences: **R.HKFDVDTRL**;

**K.GPNDHTIAQIK**.D;

**K.GIDPPSLDLLAR**.A;

**R.LVEGLVLDHGSR**.H;

**K.SEINAGFFYSNAEQR**.E;

**K.NTIEDEAVVLGAGAFELAR**.K

Calculated Mr: **59556**

Calculated pI: **6.08**

Probability Based Mowse Score:

Ions score is  $-10 \cdot \log(P)$ , where P is the probability that the observed match is a random event. Individual ions scores  $> 46$  indicate identity or extensive homology ( $p < 0.05$ ). Protein scores are derived from ions scores as a non-probabilistic basis for ranking protein hits.

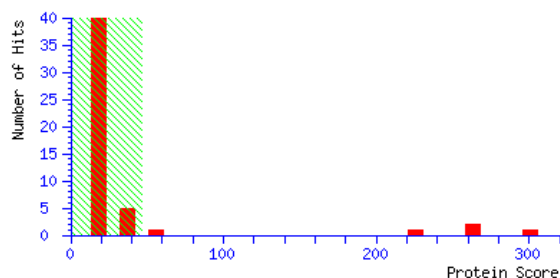

Matched peptide sequences: shown in **Bold Red**:

```
1  MSLRVLNPNA  EVLNKSAALH  MNINAAGLQ  DVLKSNLGP  GTIKMLVGG
51  GDIKLTKDG  TLLKEMQIQ  PTAIMIART  VAQDDISGD  TTSTVIFIG
101 LMKQSERYIG  EGMHPRVLD  GFEIAKRAT  QFLEKFKTP  VMGDEPDKE
151 LKMVARTTLR  TKLYETLAD  LTDIVVNAV  CIRKPEEAID  LFMVEIMHM
201 HKFDVDTRLV EGLVLDHGSR  HPGMKRRAE  CYILTCNVSL  EYDKSEINAG
251 FFYSNAEQR  KMVAAERRQ  DERVEKIEL  KNKVCSGND  NFVVINQGI
301 DPPSLDLLAR  AGIIALRRA  RRNMERLVA  CGGEAVNSV  DLTPDCLGWA
351 GLVYEHILGE  EKYTFVEHV  NPHSCTILIK  GPNDHTIAQI  KDAVRDGLRA
401 VKNTIEDEAV VLGAGAFELA  ARKYLISEVK  KTVKGRAQL  IEAFADALL
451 IPKTLAENSG  LDTQDEIVS  TGEHDRENIV  GLNLQTTGG  DPQMEGIFDN
501 YSVKRQLINS  GPVIASQLL  VDEVIRAGRN  MRKPN
```

Spot No.: **D20**

NCBI accession No.: **gi|225438145** Species: *Vitis vinifera*

**PFF** score: **[75]**

Protein name: **PREDICTED: malate dehydrogenase, cytoplasmic**

Matched peptides No.: **[1]** Sequence coverage %: **[3]**

Matched sequences: **K.IVQGLHIDEFSR.K**

Calculated Mr: **35881**

Calculated pI: **6.18**

### Probability Based Mowse Score:

Ions score is  $-10 \cdot \log(P)$ , where P is the probability that the observed match is a random event. Individual ions scores  $> 46$  indicate identity or extensive homology ( $p < 0.05$ ). Protein scores are derived from ions scores as a non-probabilistic basis for ranking protein hits.

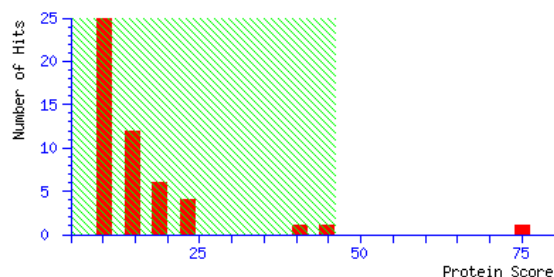

Matched peptide sequences: shown in **Bold Red**:

```
1 MAKEPVRVLV TGAAGQIGYA LVPMIARGVM LGADQPVILH MLDIPPAAEA
51 LNGVKMELVD AAFPLLKGVV ATTDVVEACT GVNIAMVGG FPRKEGMERK
101 DVMSKNVSIY KSQASALENH AAANCKVLV ANPANTNALI LKEFAPSIPE
151 KNISCLTRLD HNRALGQVSE RLVNQVSDVK NVIIWGNHSS TQYPDVNHAT
201 VKTPAGEKPV RGLVGDDAWL NGEFITTQQ RGAAIKARK LSSALSAASA
251 ACDHIRDWL GTPEGTWVSM GVYS DGSYNV PAGLIYSFPV TCCAGEWKIV
301 QGLHIDEFSR KKLDLTAQEL SEEKELAYSC LS
```



Spot No.: **D21**

NCBI accession No.: **gi|224056377** Species: *Ricinus communis*

**PFF** score: **[116]**

Protein name: **Aspartic proteinase precursor**

Matched peptides No.: **[3]** Sequence coverage %: **[7]**

Matched sequences: **K.GEHTYVPVTQK.G;**

**K.EPVFSFWFNR.N;**

**K.NYMDAQYFGEIGIGTPPQK.F + Oxidation (M)**

Calculated Mr: **56596**

Calculated pI: **5.19**

### Probability Based Mowse Score:

Ions score is  $-10 \cdot \log(P)$ , where P is the probability that the observed match is a random event. Individual ions scores  $> 46$  indicate identity or extensive homology ( $p < 0.05$ ). Protein scores are derived from ions scores as a non-probabilistic basis for ranking protein hits.

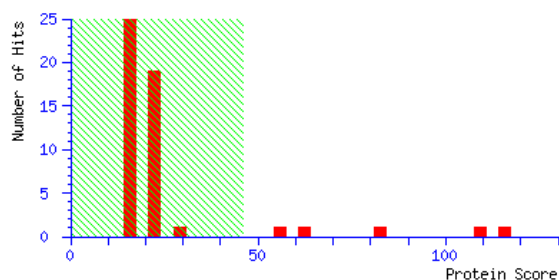

Matched peptide sequences: shown in **Bold Red**:

```
1  MGTIFKPALF  FCLILLPLVC  ATASSNDGL  VRIGLKKRKF  DQNNRVAAQF
51  ESKEGEAFRA  SIKKYHIRGN  LGDAEDIDIV  SLKNYMDAQY FGEIGIGTPP
101 QKFTVIFDTG  SSNLWVPSSK  CYFSVACYFH  SKYKSGQSS  YKKNKGSADI
151  HYG TGAISGF  FSQDNVKVGE  LVIKNQEFIE  ATREPSITFL  VAKFDGILGL
201  GFQEISVGNA  VPVWYNMVNQ  GLVKEPVFSF WFNRNADEDE  GGEIVFGGMD
251  PNHYGEHTY  VPVTQKGYWQ  FDMGDVLIDG  KITGICSSGC  AAIADSGTSL
301  LAGPTTIITE  VNHAIGATGV  VSQECKAVVA  QYGETIIAML  LAKDQPQKIC
351  SQIGLCTFDG  SRGVSMGIES  VVNEKIQEVA  GGLHDAMCST  CEMAVVWMQN
401  QLKQNQTQEH  ILNYVNELCE  RLPSPMGESA  VDCGSLSTMP  NVSFTIGGRV
451  FDLAPEQYVL  KVG DGEAAQC  ISGFTALDVP  PPRGPLWILG  DVFMGPFHTV
501  FDYGNKRVGF  AEVA
```

Spot No.: **D22**

NCBI accession No.: **gi|255554865** Species: *Ricinus communis*

**PFF** score: **[145]**

Protein name: **lactoylglutathione lyase, putative**

Matched peptides No.: **[4]** Sequence coverage %: **[16]**

Matched sequences: **K.FYTECFGMK.L;**

**K.ITSFLDPDGWK.T;**

**K.DPDGYIFELIQR.G;**

**R.GPTPEPLCQVMLR.V + Oxidation (M)**

Calculated Mr: **31641**

Calculated pI: **7.63**

Probability Based Mowse Score:

Ions score is  $-10 \cdot \log(P)$ , where P is the probability that the observed match is a random event. Individual ions scores  $> 46$  indicate identity or extensive homology ( $p < 0.05$ ). Protein scores are derived from ions scores as a non-probabilistic basis for ranking protein hits.

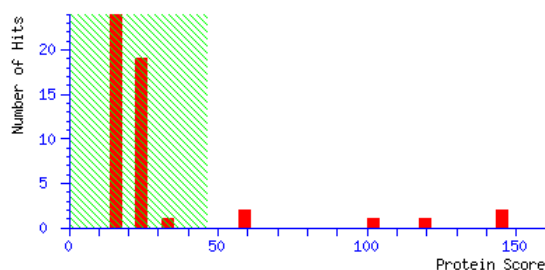

Matched peptide sequences: shown in **Bold Red**:

```
1  MAAEATAPNA  DVLEWPKKDK  RLLHAVYRV  GLDRTIKFY  TECFGMKLLR
51  KRDIPEEKYS  NAFLGFGPEE  TNFVVELTYN  YGVTSYDIGT  GFGHFAIATQ
101  DVYKLVEEVL  AKGGAVTREP  GPVKGGTTVI  AFVKDPGYI  FELIQRGPTP
151  EPLCQVMLRV  GDLDRSIRFY  EKALGMKLLR  KVDKPEYKYT  LAMMGYADEY
201  ETTVLELTYN  YGVTEYTKGN  AYAQVAISTD  DVYKSAEVDN  LVTQELGGKI
251  TRQPGPIPL  NTKITSFLDP  DGWKTKRKR
```

Spot No.: **D23**

NCBI accession No.: **gi|356517215** Species: *Glycine max*

PFF score: **[466]**

Protein name: **uncharacterized protein LOC100817735**

Matched peptides No.: **[5]** Sequence coverage %: **[22]**

Matched sequences: **R.LGLSAVIMGSR.G;**

**K.IHIVKDHDMK.E + Oxidation (M);**

**K.IGVAVDLSDESAYAVR.W;**

**R.KIGVAVDLSDESAYAVR.W;**

**K.LGSVSDYCVHHCVPVVVVR.Y**

Calculated Mr: **27677**

Calculated pI: **5.83**

Probability Based Mowse Score:

Ions score is  $-10 \cdot \log(P)$ , where P is the probability that the observed match is a random event. Individual ions scores  $> 46$  indicate identity or extensive homology ( $p < 0.05$ ). Protein scores are derived from ions scores as a non-probabilistic basis for ranking protein hits.

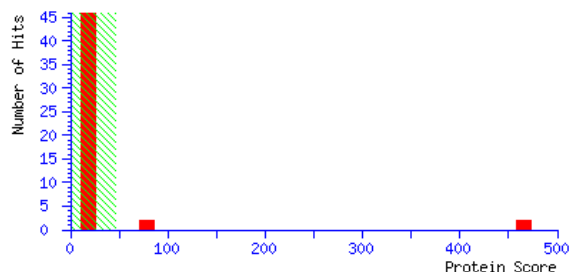

Matched peptide sequences: shown in **Bold Red**:

```
1  MQPHQNPPAL  DSDPQLPQIK  IHHPASPRHH  HPSSAGAATP  TPTAGARRKI
51  GVAVDLSDES  AYAVRWAVQH  YIRPGDAVIL  LHVSATNVLF  GADWGSIDLS
101 INTDPNSDED  AVSAVNNSND  HNSKRKLEDD  FDAFTASKAA  DLAKPLRELQ
151 IPFKIHIVKD  HDMKERLCLE  VERLGLSAVI  MGSRGFGAVR  RGSDGKLGSV
201 SDYCVHHCVC  PVVVVRYPDD  KDAVAAATTA  EPVAVKGDG  EGEAVVQVPV
251  HKKED
```

Spot No.: **D24**

NCBI accession No.: **gi|356569000** Species: *Glycine max*

PFF score: **[505]**

Protein name: **heat shock cognate 70 kDa protein-like**

Matched peptides No.: **[11]** Sequence coverage %: **[19]**

Matched sequences:

**K.ITITNDKGR.L;K.DAGVIAGLNVMR.I;K.DAGVIAGLNVMR.I + Oxidation (M);R.MVNHFVQEFK.R + Oxidation (M);K.NALENYAYNMR.N;K.NALENYAYNMR.N (M);K.SSVHDEVVLVGGSTR.I;R.TPSYVAFTDTER.L;K.ATAGDTHLGGEDFDNR.M; R.IINEPTAAAIAYGLDKK.A;K.EQVFSTYSDNQPGVLIQVYEGER.T**

Calculated Mr: **71194**

Calculated pI: **5.10**

Probability Based Mowse Score:

Ions score is  $-10 \cdot \log(P)$ , where P is the probability that the observed match is a random event. Individual ions scores > 46 indicate identity or extensive homology ( $p < 0.05$ ). Protein scores are derived from ions scores as a non-probabilistic basis for ranking protein hits.

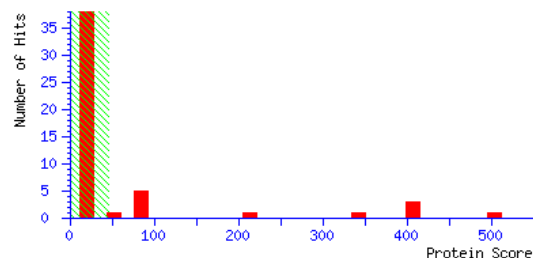

Matched peptide sequences: shown in **Bold Red**:

```
1  MAGKGEGLAI  GIDLGTTYSC  VGVWQHDRV  I IANDQGNRT  TPSYVAFTDT
51  ERLIGDAAKN  QVAMNPINTV  FDAKRLIGRR  VSDPSVQSDM  KLWPFKVTAG
101  AGEKPMIGVN  YKGEKQFAA  EEISSMVLTK  MREIAEAYLG  STVKNAVTV
151  PAYFNDSQRQ  ATKDAGVIAG  LVNMRINEP  TAAAIAYGLD  KKATSVGEKN
201  VLIFDLGGGT  FDVSLTIEE  GIFEVKATAG  DTHLGGEDFD  NRMVNHVQVE
251  FKRKNKKDIT  GNPRLRRLR  TSCERAKRTL  SSTAQTIEI  DSLFEGIDFY
301  STITRARFEE  LNMDLFRKCM  EPVEKCLRDA  KMDKSSVHDV  VLVGGSTRIP
351  KVQQLLQDF  NGKDLCKSIN  PDEAVAYGAA  VQAAILSGEG  NEKVQDLLL
401  DVTPLSLGLE  TAGGVMTVLI  PRNTTIPTKK  EQVFSTYSDN  QPGVLIQVYE
451  GERTRTRDNN  LLGKFELSGI  PPAPRGVPQI  TVCFDIDANG  ILNVAEDKT
501  TGQKNKITIT  NDKGRLSKEE  IEKMQEAEK  YKSEDEEHKK  KVEGKNALEN
551  YAYNMRNTIK  DEKISSKLSS  EDKTKIDNAI  EQAIQWLDTN  QLAEDEFED
601  KMKELEGICN  PIIAKMYQGG  AGTGGDVDDD  APPAGGSGAG  EKIEEVD
```

Spot No.: **D25**

NCBI accession No.: **gi|132270** Species: *Hevea brasiliensis*

**PFF** score: **[405]**

Protein name: **Rubber elongation factor protein**

Matched peptides No.: **[4]** Sequence coverage %: **[38]**

Matched sequences: **K.NVAVPLYNR.F;**

**K.DASIQVVS AIR.A;**

**K.FVDSTVVASVTI DR.S;**

**K.DKSGPLQPGVDIIEGPVK.N**

Calculated Mr: **14713**

Calculated pI: **5.04**

Probability Based Mowse Score:

Ions score is  $-10 \cdot \log(P)$ , where P is the probability that the observed match is a random event. Individual ions scores  $> 46$  indicate identity or extensive homology ( $p < 0.05$ ). Protein scores are derived from ions scores as a non-probabilistic basis for ranking protein hits.



Matched peptide sequences: shown in **Bold Red**:

```
1 MAEDEDNQGG QEGGLKYLGF VQDAATYAVT TFSNVYLF AK DKSGPLQPGV
51 DIIEGPVKNV AVPLYNRF SY IPNGALKFVD STVVASVTII DRSLPPIVKD
101 ASIQVVS AIR AAPEAARSLA SSLPGQTKIL AKVIFYGEN
```

Spot No.: **D26**

NCBI accession No.: **gi|6624721** Species: *Pisum sativum*

**PFF** score: **[79]**

Protein name: **putative cysteine protease**

Matched peptides No.: **[2]** Sequence coverage %: **[7]**

Matched sequences: **R.SGQIDSNELR.D;**  
**R.ALSSYNQSFSLR.T**

Calculated Mr: **31321**

Calculated pI: **7.81**

### Probability Based Mowse Score:

Ions score is  $-10 \cdot \log(P)$ , where P is the probability that the observed match is a random event. Individual ions scores  $> 45$  indicate identity or extensive homology ( $p < 0.05$ ). Protein scores are derived from ions scores as a non-probabilistic basis for ranking protein hits.

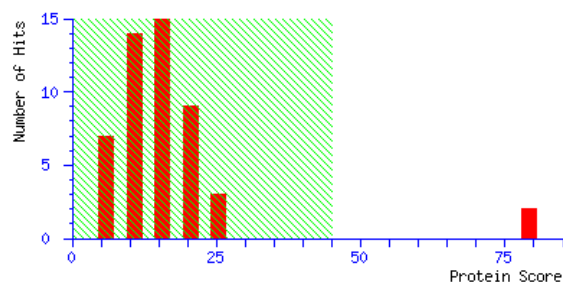

Matched peptide sequences: shown in **Bold Red**:

```
1  RFFLLLGKTL  SPFNMSGYPN  QSPNYGYGYN  APPPTQSYGA  PPSQSYGAP
51  PPSQSYGAPP  PSQYGAPPPG  QSYSASPYGQ  PSAPYAAPHQ  KPPKEESHSS
101 GGGAYPPPAH  GSPFASLLPS  TFPPGTDPSI  VACFQVADQD  GSGLIDDKEL
151 QRALSSYNQS FSLRTVHLLM  YHFTNTSVKI  GPKEFTSLFY  SLQSWRGIFE
201 RFDKDRSGQI DSNELRDALL  SLGYAVSPTV  LDLLVSKFDK  TGGKHKAVEY
251 DNFIECCLTV  KGLTDKFKEK  DTGILALQHF  PMRRLC
```

Spot No.: **D27**

NCBI accession No.: **gi|132270** Species: *Hevea brasiliensis*

**PFF** score: **[340]**

Protein name: **Rubber elongation factor protein**

Matched peptides No.: **[4]** Sequence coverage %: **[38]**

Matched sequences: **K.NVAVPLYNR.F;**

**K.DASIQVVS AIR.A;**

**K.FVDSTVVASVTI I DR.S;**

**K.DKSGPLQPGVDI I EGPVK.N**

Calculated Mr: **14713**

Calculated pI: **5.04**

Probability Based Mowse Score:

Ions score is  $-10 \cdot \log(P)$ , where P is the probability that the observed match is a random event. Individual ions scores  $> 46$  indicate identity or extensive homology ( $p < 0.05$ ). Protein scores are derived from ions scores as a non-probabilistic basis for ranking protein hits.



Matched peptide sequences: shown in **Bold Red**:

```
1 MAEDEDNQGG QGEGLYLGF VQDAATYAVT TFSNVYLF AK DKSGPLQPGV
51 DIIEGPVKNV AVPLYNRFSY IPNGALKFVD STVVASVTII DRSLPPIVKD
101 ASIQVVS AIR AAPEAARSLA SSLPGQTKIL AKVFGYEN
```

Spot No.: **D28**

NCBI accession No.: **gi|314991144**

Species: *Gossypium hirsutum*

**PFF** score: **[115]**

Protein name: **mitogen-activated protein kinase**

Matched peptides No.: **[3]**

Sequence coverage %: **[9]**

Matched sequences: **K.YIHSANVLHR.D;**

**R.HMDHENVVAIR.D;**

**R.VTSEDFMTEYVVTR.W**

Calculated Mr: **46237**

Calculated pI: **5.47**

Probability Based Mowse Score:

Ions score is  $-10 \cdot \log(P)$ , where P is the probability that the observed match is a random event. Individual ions scores  $> 45$  indicate identity or extensive homology ( $p < 0.05$ ). Protein scores are derived from ions scores as a non-probabilistic basis for ranking protein hits.

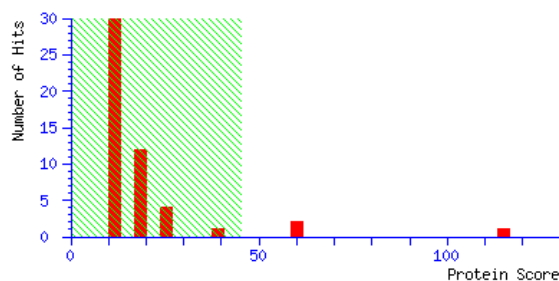

Matched peptide sequences: shown in **Bold Red**:

```
1  MEGGGPPQAA  DTEMAEAAQQ  QPQHHQQRPP  QVAAGLENIP  ATLSHGGRFI
51  QYNIFGNIFE  VTAKYKPPIM  PIGKGAYGIV  CSALNSETNE  HVALKKIANA
101 FDNKIDAKRT  LREIKLLRHM DHENVVAIRD  IIPPPQRECF  NDVYIAYELM
151 DTDLHQIIRS  NQALSEEHCQ  YFPYQILRGL  KYIHSANVLH RDLKPSNLLL
201 NANCDLKICD  FGLARVTSES DFMTEYVVTR  WYRPPPELLN  SSDYTAAIDV
251 WSVGCIEMEL  MDRKPLFPGR  DHVHQLRLLM  ELIGTPSEAE  LEFLNENAKR
301 YIRQLPLYRR  QSFTEKFPNV  PPLAIDLVEK  MLTFDPRQRI  TVEDALAHPY
351 LITSLHDISDE  PVCMTPFSPD  FEQHALTEEQ  MKELIYREAL  AFNPEYLQQ
```



Spot No.: **D29**

NCBI accession No.: **gi|118485535**

Species: *Populus trichocarpa*

PFF score: **[82]**

Protein name: **unknown**

Matched peptides No.: **[1]**

Sequence coverage %: **[8]**

Matched sequences: **K.VATPAQAQEVHLELR.K**

Calculated Mr: **18429**

Calculated pI: **5.59**

### Probability Based Mowse Score:

Ions score is  $-10 \cdot \log(P)$ , where P is the probability that the observed match is a random event. Individual ions scores  $> 46$  indicate identity or extensive homology ( $p < 0.05$ ). Protein scores are derived from ions scores as a non-probabilistic basis for ranking protein hits.

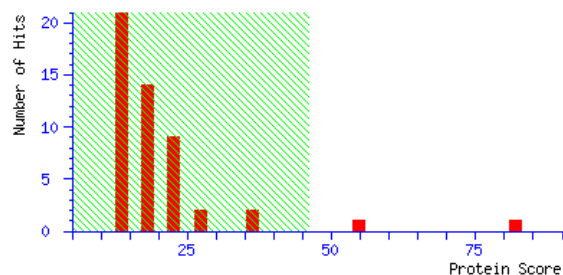

Matched peptide sequences: shown in **Bold Red**:

```
1 MLVNLGIPWV ILGHSERRSL LNESNEFVGD KVAYALSLGL KVIACVGETL
51 QQRESGSTMA VVAAQTKAIA ANVSYWDNVV MAYEPVWAIG TGKVATPAQA
101 QEVHLELRKW FHDNVGAEVA ASTRIIYGGV VNGANCKELA GQPDVDGFLV
151 GGASLKPEFI DIIKSATVKS QL
```

Spot No.: **D30**

NCBI accession No.: **gi|132270** Species: *Hevea brasiliensis*

**PFF** score: **[470]**

Protein name: **Rubber elongation factor protein**

Matched peptides No.: **[4]** Sequence coverage %: **[27]**

Matched sequences: **K.NVAVPLYNR.F;**

**K.DASIQVVS AIR.A;**

**K.SGPLQPGVDIIEGPVK.N;**

**K.DKSGPLQPGVDIIEGPVK.N**

Calculated Mr: **14713**

Calculated pI: **5.04**

Probability Based Mowse Score:

Ions score is  $-10 \cdot \log(P)$ , where P is the probability that the observed match is a random event. Individual ions scores  $> 46$  indicate identity or extensive homology ( $p < 0.05$ ). Protein scores are derived from ions scores as a non-probabilistic basis for ranking protein hits.



Matched peptide sequences: shown in **Bold Red**:

```
1 MAEDEDNQQG QGEGCLKYLGF VQDAATYAVI TFSNVYLFAK DKSGPLQPGV
51 DIIEGPVKNV AVPLYNRFSY IPNGALKFVD STVVASVTII DRSLPPIVKD
101 ASIQVVS AIR AAPEAARSLA SSLPGQTKIL AKVIFYGEN
```

Spot No.: **D31**

NCBI accession No.: **gi|470127750**

Species: *Fragaria vesca subsp. Vesca* PFF score: **[80]**

Protein name: **uncharacterized protein LOC101300446**

Matched peptides No.: **[1]** Sequence coverage %: **[3]**

Matched sequences: **K.KLDLVITSPLLR.T**

Calculated Mr: **36660**

Calculated pI: **6.43**

### Probability Based Mowse Score:

Ions score is  $-10 \cdot \log(P)$ , where P is the probability that the observed match is a random event. Individual ions scores  $> 46$  indicate identity or extensive homology ( $p < 0.05$ ). Protein scores are derived from ions scores as a non-probabilistic basis for ranking protein hits.

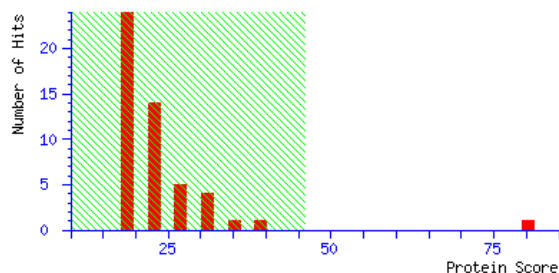

Matched peptide sequences: shown in **Bold Red**:

```
1  MTVSISSIYT  PHISLIPLSV  PTSTSPSSKF  PKS KHHSILL  CFSSPPDMA
51  AGATSLYPLH  RSKTIHLVRH  AQGIHNVEGE  KDHLAYMSHD  LFDAHLTPLG
101  WKQVDNLHKH  VQACGLTKKL DLVITSPLLR  TMQTAVGVFG  GEAYTDGIDV
151  PPLMVENAGN  SLHAAISSLN  CPPFVAVELC  REHLGVHPCD  KRRSISEYRP
201  LFPAIDFSLI  ENDDDILWTP  DIREKNEEVA  ARGLKFLNWL  WTREEKNIAI
251  VTHSGFLYHT  LSAFGNDCHS  SIKNEISTHF  ANCELRSMVI  VDRGLIGSNS
301  TSATNYPGKN  PQGLDLPSDL  ADKKNPVSK
```

Spot No.: **D32**

NCBI accession No.: **gi|132270** Species: *Hevea brasiliensis*

**PFF** score: **[398]**

Protein name: **Rubber elongation factor protein**

Matched peptides No.: **[4]** Sequence coverage %: **[38]**

Matched sequences: **K.NVAVPLYNR.F;**

**K.DASIQVVS AIR.A;**

**K.FVDSTVVASVTI DR.S;**

**K.DKSGPLQPGVDIIEGPVK.N**

Calculated Mr: **14713**

Calculated pI: **5.04**

Probability Based Mowse Score:

Ions score is  $-10 \cdot \log(P)$ , where P is the probability that the observed match is a random event. Individual ions scores  $> 46$  indicate identity or extensive homology ( $p < 0.05$ ). Protein scores are derived from ions scores as a non-probabilistic basis for ranking protein hits.

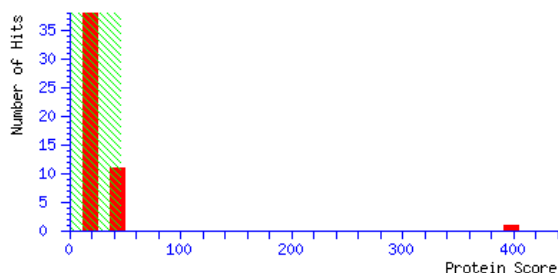

Matched peptide sequences: shown in **Bold Red**:

```
1 MAEDEDNQQG QGEGCLKYLGF VQDAATYAVT TFSNVYLFAK DKSGPLQPGV
51 DIIEGPVKNV AVPLYNRFSY IPNGALKFVD STVVASVTII DRSLPPIVKD
101 ASIQVVS AIR AAPEAARSLA SSLPGQTKIL AKVFGYEN
```

Spot No.: **D33**

NCBI accession No.: **gi|351724891** Species: *Glycine max*

**PFF** score: **[106]**

Protein name: **enolase**

Matched peptides No.: **[2]**

Sequence coverage %: **[7]**

Matched sequences: **R.AAVPSGASTGIYEALR.D;**

**R.IEEELGAEAVYAGANFR.T**

Calculated Mr: **47975**

Calculated pI: **5.31**

### Probability Based Mowse Score:

Ions score is  $-10 \cdot \log(P)$ , where P is the probability that the observed match is a random event. Individual ions scores  $> 45$  indicate identity or extensive homology ( $p < 0.05$ ). Protein scores are derived from ions scores as a non-probabilistic basis for ranking protein hits.

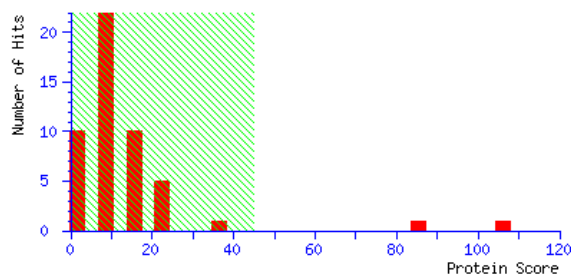

Matched peptide sequences: shown in **Bold Red**:

```
1  MATIVSINAR QIFDSRGNPT VEVDLTCS DG TFARAAAVPSG ASTGIYEALE
51 LRDGGSDYL G KGVSKAVDNV NTVIGPALIG KDPTEQTAID NLMVQQLDGT
101 VNEWGWCKQK LGANAILAVF LAVCKAGASV LKIPLYKHIA NIAGNKKLVL
151 PVPAFNVI NG GSHAGNKLAM QEFMVLPGA SSFKEAMKMG VEVYHNLKSV
201 IKKKGQDAI NVGDEGGFAP NIQENKEGLE LLKTAIAKAG YTGKVVIGMD
251 VAASEFYKED KTYDLNFKED NNDGSQRISG DALKDLYKSF VSEYPIVSIE
301 DPFQDDWEH YAKLTAEVGA NVQIVGDDLL VTNPKRVQKA IDTKACNALL
351 LKVNQIGSVT ESIEAVRMSK KAGWGMASH RSGETEDTFI ADLSVGLATG
401 QIKTGAPCRS ERLAKYNQLL RIEEELGAEA VYAGANFRTP VEPY
```

Spot No.: **D34**

NCBI accession No.: **gi|255578278** Species: *Ricinus communis*

**PFF** score: **[154]**

Protein name: **hypothetical protein RCOM\_0537780**

Matched peptides No.: **[2]** Sequence coverage %: **[6]**

Matched sequences: **K.QESEYGSGGYGR.R;**  
**R.KPSYGEEGGYGER.T**

Calculated Mr: **41389**

Calculated pI: **4.65**

Probability Based Mowse Score:

Ions score is  $-10 \cdot \log(P)$ , where P is the probability that the observed match is a random event. Individual ions scores  $> 46$  indicate identity or extensive homology ( $p < 0.05$ ). Protein scores are derived from ions scores as a non-probabilistic basis for ranking protein hits.

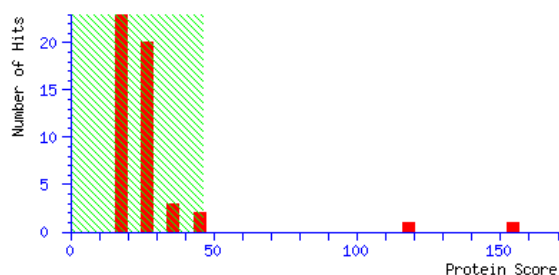

Matched peptide sequences: shown in **Bold Red**:

```
1  MPYYTRSEDD  VDNDFDFDPT  PYGGGYDLAL  TYGRPLPPSD  ETCYQNSAIA
51  DDDVDYDRPN  FTSYAEPSAY  NDDILQEEYN  SYSRPKPRPG  FIPGGGIGGD
101 PYSRPHAAPG  FQPGSGGYGG  VSEYEKPSGY  GRRPDSEYGS  GGYGGGTEYE
151 RPSGEDYDGS  HGRKQDSEYG  SGGYGRRPES  EYGSGGGYER  PSSEEYSGSY
201 GRKQESEYGS GGYGRRPEAE YGSGYGGRPE  TEYGGGGGSE  YGGGYGRKPS
251 YGEEGGYGER TEYERPSYGD  DPPRRPGYGR  QDDEYERPSY  ERKSDDDNDG
301 SRRKYGDGDD  EKGYQKKYGG  YGDDDDDEEGS  RRKYGYGGEE  ESYGRKKYGD
351 DGSDDDEKHH  HRHKHHQHKH  SDDE
```

Spot No.: **D35**

NCBI accession No.: **gi|1143427** Species: *Cucumis sativus*

**PFF** score: **[378]** Protein name: **heat shock protein 70**

Matched peptides No.: **[5]** Sequence coverage %: **[8]**

Matched sequences: **K.DIDEVILVGGSTR.I;**

**K.QFAAEEISAQVLR.K;**

**K.AVVTVPAYFNDSQR.T;**

**K.LSFKDIDEVILVGGSTR.I;**

**K.KQDITITGASTLPSDEVER.M**

Calculated Mr: **75480**

Calculated pI: **5.15**

### Probability Based Mowse Score:

Ions score is  $-10 \cdot \log(P)$ , where P is the probability that the observed match is a random event. Individual ions scores  $> 45$  indicate identity or extensive homology ( $p < 0.05$ ). Protein scores are derived from ions scores as a non-probabilistic basis for ranking protein hits.

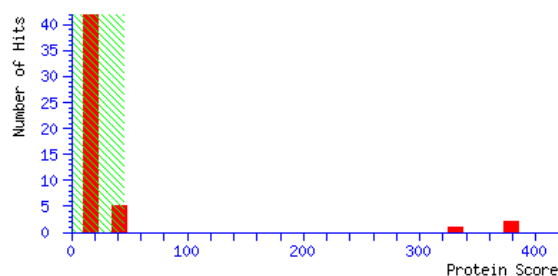

Matched peptide sequences: shown in **Bold Red**:

```
1  MGASTAQIHG  LGAPSF AAAS  MRKSNNVSSR  SVFFGQKLG N  SSAFPAAAF L
51  NLRNNTSRRN  SSVRPLRIV N  EKVVGIDLGT  TNSAVAAMEG  GKPTIVTNA E
101 GQRITPSVVA  YTKNGDRLV G  QIAKRQAVVN  PENTFFSVKR  FIGRKMSEV D
151 EESKQVSYRV  ERDENG NVKL  ECPAIGKQFA AEEISAQVLR  KLVDDASKFL
201 NDKVTKAVVT VPAYFNDSQR  TATKDAGRIA  GLEVLRIINE  PTAASLAYGF
251 EKKSNETILV  FDLGGGTFD V  SVLEVGDGVF  EVLSTSGDTH  LGGDDDFDK RI
301 VDWLAANFKR  DEGIDLLKDK  QALQRLTETA  EKAKMELSSL  TQANISLPFI
351 TATADGPKHI  ETTITRAKFE  ELCSDLLDRL  KTPVENSLRD  AKLSFKDIDE
401 VILVGGSTR I  PAVQELVKKM  TGKEPNVTVN  PDEVVALGAA  VQAGVLAGDV
451 SDIVLLDVSP  LSLGLETLGG  VMTKIIPRNT  TLPTSKSEVF  STAADGQTSV
501 EINVLQGERE  FVRDNKSLGS  FRLDGIPPAP  RGV PQIEVKF  DIDANGILSV
551 TAIDKGSGK K QDITITGAST LPSDEVERMV  SEADKFAKED  KEKRDAIDTK
601 NQADSVVYQT  EKQLKELGDK  VPGPVKEKVE  SKLGELKEAI  SGGSTEAIKE
651 AMAALNQEV M  QLGQSLYNQP  GAGAAPGPGA  SSES GPSEST  GKGPEGDVID
701 ADFSDSK
```

Spot No.: **D36**

NCBI accession No.: **gi|164604960** Species: *Hevea brasiliensis*

**PFF** score: **[120]** Protein name: **acetyl-CoA C-acetyltransferase**

Matched peptides No.: **[2]** Sequence coverage %: **[5]**

Matched sequences: **R.ILVTLGVLK**;

**M.APVAAAEIKPR**.D

Calculated Mr: **41798**

Calculated pI: **6.96**

### Probability Based Mowse Score:

Ions score is  $-10 \cdot \log(P)$ , where P is the probability that the observed match is a random event. Individual ions scores  $> 45$  indicate identity or extensive homology ( $p < 0.05$ ). Protein scores are derived from ions scores as a non-probabilistic basis for ranking protein hits.

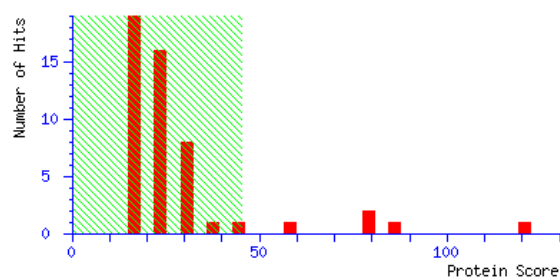

Matched peptide sequences: shown in **Bold Red**:

```
1  MAPVAAAEIK PRDVCIVGVA RTPMGGFLGL LSTLPATKLG SIAIEAALKR
51 ASVDPSLVQE VFFGNVLSAN LGQAPARQAA LGAGIPNSV CTTVNKVCAS
101 GMKATMLAAQ SIQLGINDVV VAGGMESMSN APKYLAEARK GSRLGHDSL
151 DGMLKDGLWD VYNDVGMGSC AEICADNHSI TREDQDKFAI HSFERGI
201 ESGAFaweiv PVEVSGGRGK PLTIIVDKDEG LGKFDPVKLR KLRPSFKENG
251 GTVTAGNASS ISDGAAALIL VSGETALKLG LQVIKIRGY ADAAQAPELF
301 TTAPALAI PK TIANAGLDAS QVDYYEINEA FAVVALANQK LLGLNPEKVN
351 VHGGAVSLGH PLGCSGARIL VTLLGVLRKK NAKYGVGGVC NGGGGASALV
401 VELL
```



Spot No.: **D37**

NCBI accession No.: **gi|37622210** Species: *Hevea brasiliensis*

**PFF** score: **[77]** Protein name: **small rubber particle protein**

Matched peptides No.: **[2]** Sequence coverage %: **[14]**

Matched sequences: **R.AVASEVHQSGVK.E;**

**R.VSSYLPLVPTER.I**

Calculated Mr: **18929**

Calculated pI: **8.99**

### Probability Based Mowse Score:

Ions score is  $-10 \cdot \log(P)$ , where P is the probability that the observed match is a random event. Individual ions scores  $> 45$  indicate identity or extensive homology ( $p < 0.05$ ). Protein scores are derived from ions scores as a non-probabilistic basis for ranking protein hits.

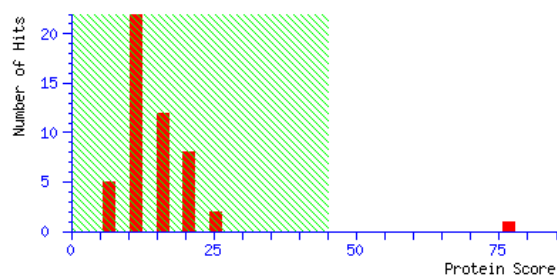

Matched peptide sequences: shown in **Bold Red**:

```
1  KFHDVPNEVL  KFVDRKVDDES  VTSLDSRVPP  VVKQVSAQAY  SVAREAPVAA
51  RAVASEVHQS  GVKETASGLA  KTLYTKYEPK  AKELYSKYEP  KAEQCAVTAW
101 RRLNQLPLFP  QVAQVVVPTA  AYCSEKYNQT  VLSTFEKGYR  VSSYLPLVPT
151 ERIAKVFSDD  VAQSMPLVSS
```

Spot No.: **D38**

NCBI accession No.: **gi|255555641** Species: *Ricinus communis*

**PFF** score: **[109]**

Protein name: **26S proteasome non-atpase regulatory subunit**

Matched peptides No.: **[2]** Sequence coverage %: **[12]**

Matched sequences: **K.HAVELEQSFMEGAYNR.V + Oxidation (M);**

**R.LPPSSQEYMILGLNLLR.L + Oxidation (M)**

Calculated Mr: **30793**

Calculated pI: **4.87**

Probability Based Mowse Score:

Ions score is  $-10 \cdot \log(P)$ , where P is the probability that the observed match is a random event. Individual ions scores  $> 46$  indicate identity or extensive homology ( $p < 0.05$ ). Protein scores are derived from ions scores as a non-probabilistic basis for ranking protein hits.

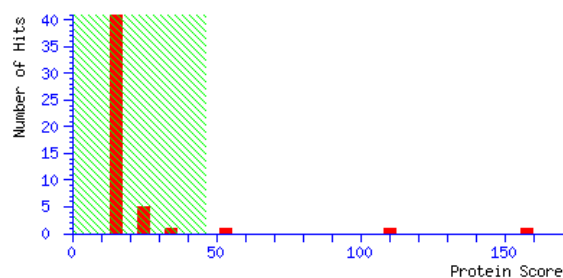

Matched peptide sequences: shown in **Bold Red**:

```
1  MDPKITEASQ  LFERFKAACV  REDVDACTKL  LSSLKVMLTE  FRSLPPLFED
51  TPNAIQELTL  ARDIYEHAVL  LNVKIGDQDA  FERDFQQLKP  YYTDASGRLP
101 PSSQEYMILG  LNLLRLLVQN  RIAEFHTELE  LLSPAALNP  AIKHAVELEQ
151 SFMEGAYNRV  LSAKQTVPYK  GYDYFMDLLA  KTVRDEIAGC  SEKAYDYLSI
201  NDARQMLLFS  SDTELLQYIK  EDHPEWEVKN  GVVIFQKAKE  SAPCKEIPSL
251  QLINQTLSYA  RELERIV
```

Spot No.: **D39**

NCBI accession No.: **gi|255541320** Species: *Ricinus communis*

**PFF** score: **[157]**

Protein name: **proteasome subunit beta type, putative**

Matched peptides No.: **[2]** Sequence coverage %: **[10]**

Matched sequences: **K.HLIYQHQNK.Q;**

**K.GCVYTYDAVGSYER.V**

Calculated Mr: **24880**

Calculated pI: **6.08**

Probability Based Mowse Score:

Ions score is  $-10 \cdot \log(P)$ , where P is the probability that the observed match is a random event. Individual ions scores  $> 46$  indicate identity or extensive homology ( $p < 0.05$ ). Protein scores are derived from ions scores as a non-probabilistic basis for ranking protein hits.

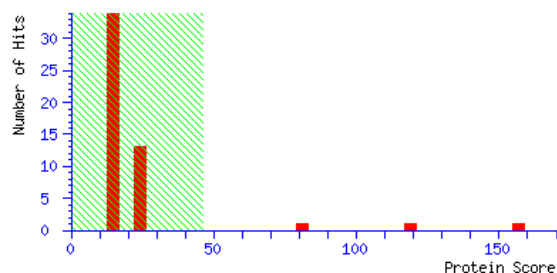

Matched peptide sequences: shown in **Bold Red**:

```
1 MTKQQANWSP YDNNGGSCVA IAGADYCVIA ADTRMSTGYN ILTRDYSKIC
51 QLAEKSVMAS SGFQADVQAL QKHLKAKHLI YQHQNKQMS CPAMGQLLSN
101 TLYFKRFFPY YAFNVLGGLD SEGKGCVYTY DAVGSYERVG YSAQGSSTL
151 IMPFLDNQLK SPSPLLLPAQ DAVTPLSEPE AVDLVKTVFA SATERDIYTG
201 DKVEIVVLNA DGIRREYMEL RKD
```

Spot No.: **D40**

NCBI accession No.: **gi|255570990** Species: *Ricinus communis*

**PFF** score: **[459]** Protein name: **heat shock protein, putative**

Matched peptides No.: **[8]** Sequence coverage %: **[16]**

Matched sequences: **K.DIDEVILVGGSTR.I;K.QFAAEEISAQVLR.K;**

**K.AVVTVPAYFNDSQR.T;K.MSEVDEESKQVSYSR.V + Oxidation (M);**

**R.QAVVNPENTFFSVKR.F;K.LSFKDIDEVILVGGSTR.I;**

**K.KQDITITGASTLPSDEVER.M;K.SEVFSTAADGQTSVEINVLQGER.E**

Calculated Mr: **75431**

Calculated pl: **5.35**

### Probability Based Mowse Score:

Ions score is  $-10*\text{Log}(P)$ , where P is the probability that the observed match is a random event. Individual ions scores > 45 indicate identity or extensive homology ( $p < 0.05$ ). Protein scores are derived from ions scores as a non-probabilistic basis for ranking protein hits.

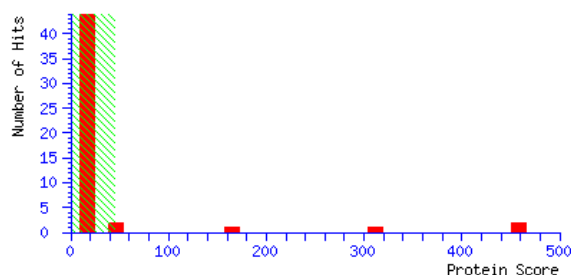

Matched peptide sequences: shown in **Bold Red**:

```
1 MASSTAQIHV LGGIGFPSSK SRKPSFSFPK KTVFLGSNLK SHQTAAFLRQ
51 SNTNARRKYG PLRVVNEKVV GIDLGTNSA VAAMEGGKPT IVTNAEGQRT
101 TPSVVAITKN GDRLVGQIAK RQAVVNPENT FFSVKRFIGR KMSEVDEESK
151 QVSYSRVVRDE NGNVKLDCPA IGKQFAAEEI SAQVLRKLVD DASKFLNDKV
201 TKAVVTVPAY FNDSQRTATK DAGRIAGLEV LRIINEPTAA SLAYGFEKKN
251 NETILVFDLG GGTIFDVSVLE VGDGVFEVLS TSGDTHLGGD DFDKRIVDWL
301 AGNFKRDEGI DLLKDKQALQ RLTETAEKAK MELSSLTQTN ISLPFITATA
351 DGPKHIIETI TRAKFEELCS DLLDRLKTPV ENSLRDAKLS FKDIDEVILV
401 GGSTRIPAVQ ELVKKMTGKD PNVTVNPDEV VALGAAVQAG VLSGDVSDIV
451 LLDVTPLSLG LETLGGVMTK IIPRNTTLPT SKSEVFSTAA DGQTSVEINV
501 LQGEREFVRD NKSLGSFRLD GIPPAPRGVP QIEVKFDIDA NGILSVTAID
551 KGTGKKQDIT ITGASTLPSD EVERMVSEAE RFAKEDKEKR DAIDTKNQAD
601 SVVYQTEKQL KELGDKVPAP VKEKVEAKLK ELKDAIEGGS TQGMKDAMAA
651 LNQEVMQLGQ SLYNQPGAGG AGPAPGGEAG PSSDSSSKGP EGDVIDADFT
701 DSK
```

Spot No.: **D41**

NCBI accession No.: **gi|351726646** Species: *Glycine max*

**PFF** score: **[97]**

Protein name: **uncharacterized protein LOC100499738**

Matched peptides No.: **[5]** Sequence coverage %: **[28]**

Matched sequences: **K.NVALYQFR.N;**

**K.LIAASGEPGDR.V;**

**K.SNEDKIMLLDSHK.L + Oxidation (M);**

**R.HYHSGMSVEEAIDLVDK.C;**

**K.LIAASGEPGDRVQFTEYIQK.N**

Calculated Mr: **22699**

Calculated pI: **5.86**

Probability Based Mowse Score:

Ions score is  $-10 \cdot \log(P)$ , where P is the probability that the observed match is a random event. Individual ions scores  $> 46$  indicate identity or extensive homology ( $p < 0.05$ ). Protein scores are derived from ions scores as a non-probabilistic basis for ranking protein hits.

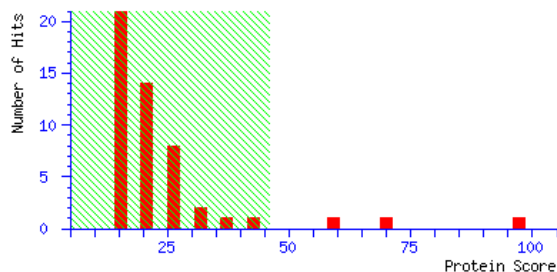

Matched peptide sequences: shown in **Bold Red**:

```
1  MECVFGLVGN  GFAIVVADSS  AVHSILVHKS  NEDKIMLLDS  HKLIAASGEP
51  GDRVQFTEYI  QKNVALYQFR  NGIPLTTAAA  ANFTRGELAT  ALRKNPYSVN
101 ILLAGYDKET  GPELYIDYI  ATLHKLEKGA  FGYGSYFSL  MMDRHYHSGM
151 SVEEAIDLVD  KCIMEIRSRL  VVAPPNEVIK  IVDKDGAREY  AWRESVKDTP
201 VPSA
```

Spot No.: **D42**

NCBI accession No.: **gi|166627** Species: *Arabidopsis thaliana*

**PFF** score: **[111]**

Protein name: **nucleotide-binding subunit of vacuolar ATPase**

Matched peptides No.: **[3]** Sequence coverage %: **[7]**

Matched sequences: **K.YQEIVNIR.L;**

**R.QIYPPINVLPSLR.L;**

**R.GYPGYMYTDLATYER.A + Oxidation (M)**

Calculated Mr: **54819**

Calculated pI: **4.98**

Probability Based Mowse Score:

Ions score is  $-10 \cdot \log(P)$ , where P is the probability that the observed match is a random event. Individual ions scores  $> 46$  indicate identity or extensive homology ( $p < 0.05$ ). Protein scores are derived from ions scores as a non-probabilistic basis for ranking protein hits.

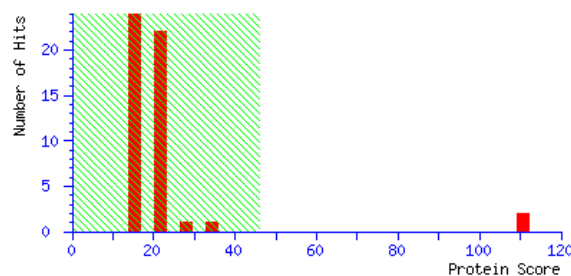

Matched peptide sequences: shown in **Bold Red**:

```
1  MSLSVNMGTN  DLDIEEGTLE  IGMEYRTVSG  VAGPLVILDK  VKGPKYQEIV
51  NIRLGDGSTR  RGQVLEVDGE  KAVVQVFEGT  SGIDNKFTTV  QFTGEVLKTP
101 VSLDMLGRIF  NGSGKPIDNG  PPILPEAYLD  ISGSSINPSE  RTYPEEMIQT
151 GISTIDVMNS  IARGQKIPLF  SAAGLPHNEI  AAQICRQAGL  VKRLEKTVDL
201 LEDHGEDNFA  IVFAAMGVNM  ETAQFFKRDF  EENGSMERVT  LFLNLANDPT
251 IERIIIPRIA  LTTAEYLAYE  CGKHVLVILT  DMSSYADALR  EVSAAREEVP
301 GRRGYPGYMY TDLATYERA  GRIEGRKGS  TQIPILTMPN  DDITHPTPDL
351 TGYITEGQIY  IDRQLHNRQI YPPINVLPSL SRLMKSAIGE  GMTRKDHSV
401 SNQLYANYAI  GKDVQAMKAV  VGEEALSSD  LLYLEFLDKF  ERKFVMQAY
451 DTRNIFQSLD  LAWTLRIFP  RELLHRIPAK  TLDQFYSRDS  TS
```

Spot No.: **D43**

NCBI accession No.: **gi|132270** Species: *Hevea brasiliensis*

**PFF** score: **[55]**

Protein name: **Rubber elongation factor protein**

Matched peptides No.: **[2]** Sequence coverage %: **[17]**

Matched sequences: **K.NVAVPLYNR.F;**

**K.FVDSTVVASVTIIDR.S**

Calculated Mr: **14713**

Calculated pI: **5.04**

Probability Based Mowse Score:

Ions score is  $-10 \cdot \log(P)$ , where P is the probability that the observed match is a random event. Individual ions scores  $> 46$  indicate identity or extensive homology ( $p < 0.05$ ). Protein scores are derived from ions scores as a non-probabilistic basis for ranking protein hits.

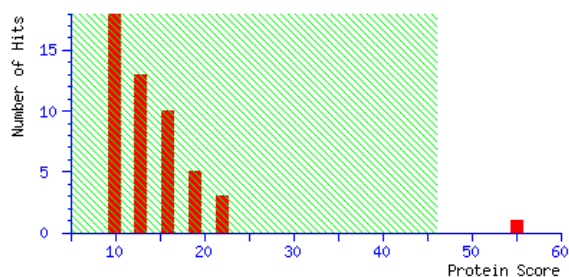

Matched peptide sequences: shown in **Bold Red**:

```
1 MAEDEDNQQG QGEGCLKYLG FVQDAATYAVT TFSNVYLFAK DKSGPLQPGV
51 DIIEGPKNV AVPLYNRFSY IPNGALKFVD STVVASVTII DRSLPPIVKD
101 ASIQVVS AIR AAPEAARSLA SSLPGQTKIL AKVFGYEN
```

Spot No.: **D44**

NCBI accession No.: **gi|255583952** Species: *Ricinus communis*

**PFF** score: **[366]**

Protein name: **proteasome subunit alpha type, putative**

Matched peptides No.: **[6]** Sequence coverage %: **[26]**

Matched sequences: **K.ATEIEVGVVR.T;R.HITIFSPEGR.L;**

**K.EQEAINFLEK.K;K.YGYEMPVDVLAK.W + Oxidation (M);  
K.LLDHTSVTHLFPITK.Y;K.ATSAGLKEQEAINFLEK.K**

Calculated Mr: **27504**

Calculated pI: **5.84**

### Probability Based Mowse Score:

Ions score is  $-10 \cdot \log(P)$ , where P is the probability that the observed match is a random event. Individual ions scores  $> 46$  indicate identity or extensive homology ( $p < 0.05$ ). Protein scores are derived from ions scores as a non-probabilistic basis for ranking protein hits.

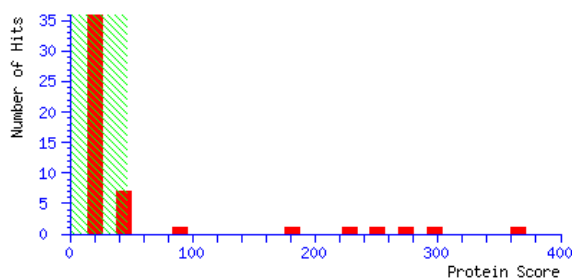

Matched peptide sequences: shown in **Bold Red**:

```
1  MSRGS GGGYD RHITIFSPEG RLFQVEYAFK AVKASGVTSI GVC GKDSVCV
51  VTQKKVPDKL LDHTSVTHLF PITKYLGLLA TGMTADARTL VQ QARNEAAE
101 FRFKYGYEMP VDVLAKWIAD KSQIYTQHAY MRPLGVVAMV LGIDDEYGPR
151 LYKCDPAGHF FGHKATSAGL KEQEAINFLE KKMKNDPAFT YEETVQTAIS
201 ALQSVLQEDF KATEIEVGVV RTENPVFRVL STEEIDEHLT AISERD
```



Spot No.: **D45**

NCBI accession No.: **gi|356547978** Species: *Glycine max*

**PFF** score: **[189]**

Protein name: **eukaryotic translation initiation factor 3 subunit K-like**

Matched peptides No.: **[3]** Sequence coverage %: **[11]**

Matched sequences: **K.NAADSVPLEHITR.I;**  
**K.TLIVLSHYLETGR.F;**  
**K.KNAADSVPLEHITR.I**

Calculated Mr: **26266**

Calculated pI: **5.48**

### Probability Based Mowse Score:

Ions score is  $-10 \cdot \log(P)$ , where P is the probability that the observed match is a random event. Individual ions scores  $> 46$  indicate identity or extensive homology ( $p < 0.05$ ). Protein scores are derived from ions scores as a non-probabilistic basis for ranking protein hits.

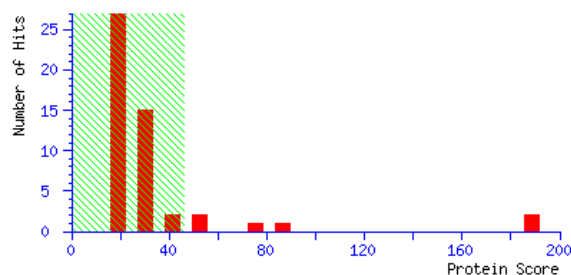

Matched peptide sequences: shown in **Bold Red**:

```
1  MGREKETTKV  AYAVEQLVAF  NRYNPDILPD  LENYVNDQVS  SQTYSLDANL
51  CLLRLYQFEP  EKMSSQIVAR  ILVKALMAMP  APDFSCLCLFL  IPERVQMEEQ
101 FKTLIVLSHY LETGRFRQFW  DEAAKSRHIV  EAVPGFEQAI  QGYAIHVLSL
151  TYQRIPRTL  AEAINIEGLS  LDKFLENQVA  NNGWVIEKSQ  GRAQLIVLPR
201  NEFNDPALKK NAADSVPLEH ITRIFPILS
```

Spot No.: **D46**

NCBI accession No.: **gi|310772392** Species: *Malpighia glabra*

**PFF** score: **[78]**

Protein name: **dehydroascorbate reductase**

Matched peptides No.: **[1]** Sequence coverage %: **[4]**

Matched sequences: **K.EHVIAGWEPK.V**

Calculated Mr: **23725**

Calculated pI: **6.40**

### Probability Based Mowse Score:

Ions score is  $-10 \cdot \log(P)$ , where P is the probability that the observed match is a random event. Individual ions scores  $> 46$  indicate identity or extensive homology ( $p < 0.05$ ). Protein scores are derived from ions scores as a non-probabilistic basis for ranking protein hits.

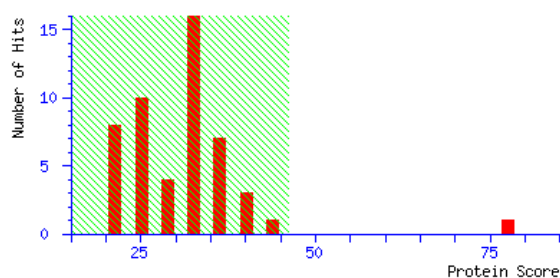

Matched peptide sequences: shown in **Bold Red**:

```
1 MALEICVKAA VGAPNVLGDC PFSQRALLTL EEKLSYKRH LFDLSNKPQW
51 FLEISPEGKV PVLKLDKQW ADSDVIVGLL EEKYPEPSLK TPPEFSSVGS
101 NIFSSFVKFL KSKDANDGTE KALLEELVAL DDHLKAHGPV VAGERVTAVD
151 LSLAPKLYHL EIALGHFKKW TVPESLSHVR NYMKALFARE SFEKTKAAKE
201 HVIAGWEPKV NA
```

Spot No.: **D47**

NCBI accession No.: **gi|255547584** Species: *Ricinus communis*

**PFF** score: **[370]**

Protein name: **Regulator of ribonuclease activity A, putative**

Matched peptides No.: **[5]** Sequence coverage %: **[33]**

Matched sequences: **R.VLVVDGGGSLR.C;**

**K.VFEDNVLIR.E;**

**R.ALQPIFQIYGR.R;**

**R.RQVFSGPVVTLK.V;**

**R.DVDEINGCDIGVR.A**

Calculated Mr: **17958**

Calculated pI: **5.39**

Probability Based Mowse Score:

Ions score is  $-10 \cdot \log(P)$ , where P is the probability that the observed match is a random event. Individual ions scores  $> 46$  indicate identity or extensive homology ( $p < 0.05$ ). Protein scores are derived from ions scores as a non-probabilistic basis for ranking protein hits.

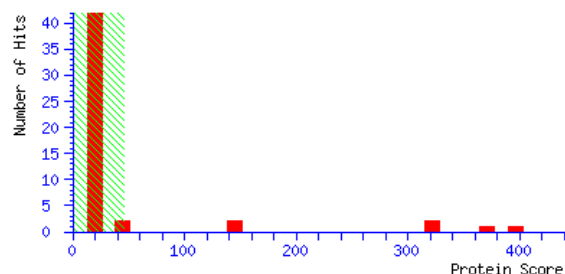

Matched peptide sequences: shown in **Bold Red**:

```
1 MALVTTAEVC DANPQLIVSG ELRALQPIFQ IYGRRQVFSG PVVTLKVFED
51 NVLIREFLEE KGNGRVLVVD GGGSLRCAIL GGNPVVQAQN NGWAGILVNG
101 CIRDVDEING CDIGVRALAS HPMKANKKGI GEKHVPITIG GTRISDGEFL
151 YADTDGILIS RNELSV
```

Spot No.: **D48**

NCBI accession No.: **gi|255568992** Species: *Ricinus communis*

**PFF** score: **[128]**

Protein name: **conserved hypothetical protein**

Matched peptides No.: **[2]** Sequence coverage %: **[8]**

Matched sequences: **K.WNKGDNR.W;**

**R.MVNNIHLNVDAFHGDKK.S**

Calculated Mr: **35473**

Calculated pI: **6.29**

Probability Based Mowse Score:

Ions score is  $-10 \cdot \log(P)$ , where P is the probability that the observed match is a random event. Individual ions scores  $> 45$  indicate identity or extensive homology ( $p < 0.05$ ). Protein scores are derived from ions scores as a non-probabilistic basis for ranking protein hits.

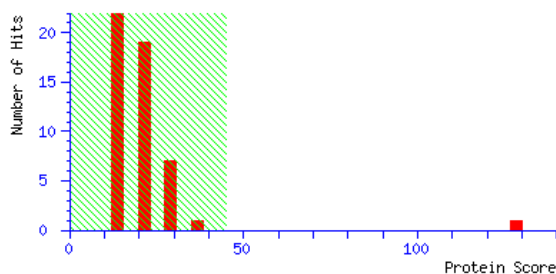

Matched peptide sequences: shown in **Bold Red**:

```
1  MEFFFGHQSH THHHHQRNNA DDDDESQFY PPPASAPPPP YTRDNEFAPP
51 PPYFQEPDFP PSPTRPYYRE NEYAPPPPPP PVQQAHVYHS SHNQELDSY
101 YPPRPPTQVT HVSHERIGTE TQTHHSFQPH FPSFLQHHTH QSGSASGLDL
151 SNKPTYKVYS KAEPNFHLTI RDGKVV LAPS DPSDEFQNWY KDERYSTRVK
201 DEEGFPCFAL VNKASGQAMK HSI GGTHPVQ LIPYNPVLD ESILWTESKD
251 LGDGYRAVRM VNNIHLNVDA FHGDKKSGGV HNGTTIVLWK WNKGDNRWR
301 ITPHCKSLN
```

Spot No.: **D49**

NCBI accession No.: **gi|356522666** Species: *Glycine max*

**PFF** score: **[206]**

Protein name: **ubiquitin carboxyl-terminal hydrolase 6-like**

Matched peptides No.: **[3]** Sequence coverage %: **[7]**

Matched sequences: **R.YLTVQFVR.F;**

**K.CQLYDLTGVPPE.R.Q;**

**K.CHISQEVNHLHEGIK.H**

Calculated Mr: **54602**

Calculated pI: **5.78**

### Probability Based Mowse Score:

Ions score is  $-10 \cdot \log(P)$ , where P is the probability that the observed match is a random event. Individual ions scores  $> 46$  indicate identity or extensive homology ( $p < 0.05$ ). Protein scores are derived from ions scores as a non-probabilistic basis for ranking protein hits.

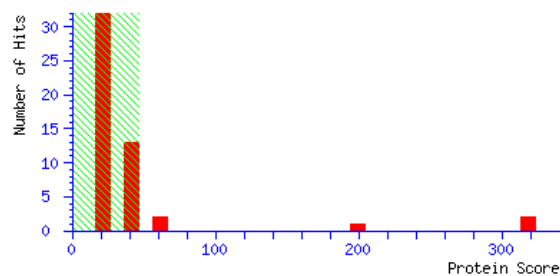

Matched peptide sequences: shown in **Bold Red**:

```
1 MITVSVRWQK EIFKDVLDLT TQSPYVFKCQ LYDLTGVPPE RQKIMVKGGL
51 LKDDADWSTV GVKEGQKLMM MGTADVVKT PEKGTVFVED LPEEEQVVAV
101 GHTAGLFNLG NTCYMNSTLQ CLHSVPELKS ALTNYSHSGR NNDVDQSSHL
151 LTIATRDLFS ELDKSVKPVA PMQFWMVLRK KYPQFGQLHN GVFMQQDAEE
201 CWTQLLYTSL QSLRSPGSSE NPDAVKALFG IELISRIHCQ ESKEESSEAE
251 SVYSLKCHIS QEVNHLHEGI KHGLKSELEK ASLVLGRSAI HLKESRINAL
301 PRYLTVQFVR FFWKRESNQK AKILRKVDYP LELDVFDFCS DELRKKLEAP
351 RQILRNEEGK KLGLKVNEKS SVQKENDVKM SDAEGATSGG GEPSVPMEE
401 GEKETQMTGI YDLVAVLTHK GRSADSGHYV GWVKQENGKW IEFDDDNPKP
451 KLEEDITRLS GGGDWHMAYI IMYKARVVSV
```

Spot No.: **D50**

NCBI accession No.: **gi|224099853**

Species: *Populus trichocarpa* PFF score: **[120]**

Protein name: **conserved hypothetical protein**

Matched peptides No.: **[2]** Sequence coverage %: **[9]**

Matched sequences: **K.GCFFTTSGGLR.S;**

**R.SFEHPLNELKPVPR.V**

Calculated Mr: **27448**

Calculated pI: **5.84**

Probability Based Mowse Score:

Ions score is  $-10 \cdot \log(P)$ , where P is the probability that the observed match is a random event. Individual ions scores  $> 46$  indicate identity or extensive homology ( $p < 0.05$ ). Protein scores are derived from ions scores as a non-probabilistic basis for ranking protein hits.

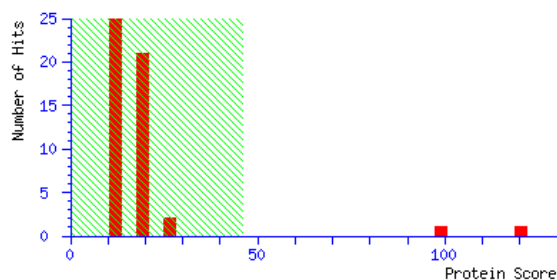

Matched peptide sequences: shown in **Bold Red**:

```
1  MLAVFDNTVA  KCPDALQSPH  SAPASSALKD  GFLANHFASQ  HPGSVTVNLG
51  TSGLISHSVE  KQNPFLPRLF  AVVDDIFCLF  QGHIDNVAVL  KQQYGLNKTA
101 NEVIVVIEAY  RTLDRGPYP  ADQVVKDIQG  KFAFILDST  SKATFFAADA
151 DGSVPFFWGA  DSEGNLVLSD  DVQIVQKGC  KSFAPFPKGC  FFTTSGGLRS
201 FEHPLNELKP  VPRVDSSGQV  CGATFKVDAE  TKKESVGMPR  VDSSYNWSSN
251  Y
```

Spot No.: **D51**

NCBI accession No.: **gi|255568794**

Species: *Ricinus communis*

Protein name: **nucleoredoxin, putative** PFF score: **[380]**

Matched peptides No.: **[6]** Sequence coverage %: **[9]**

Matched sequences: **K.LIEAYHEIK.A;K.KCDFDLHPK.C;**

**K.LVELAEIEKAR.L;K.NQTLSSILVSSSR.D;**

**K.KNQTLSSILVSSSR.D;R.VEYFRQEEENAK.K**

Calculated Mr: **63728**

Calculated pI: **5.46**

### Probability Based Mowse Score:

Ions score is  $-10 \cdot \log(P)$ , where P is the probability that the observed match is a random event. Individual ions scores  $> 46$  indicate identity or extensive homology ( $p < 0.05$ ). Protein scores are derived from ions scores as a non-probabilistic basis for ranking protein hits.

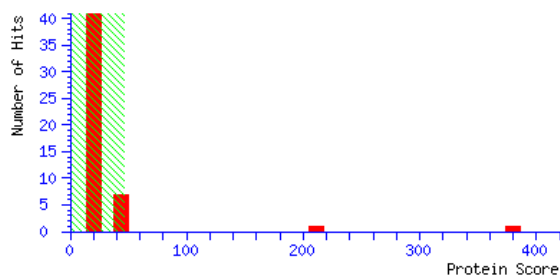

Matched peptide sequences: shown in **Bold Red**:

```
 1 MADDPVIDVS HDLLSLLSSD DRDFLIRSNG DQVKISNLVG KIVGLYFSGS
51 WCGPCRHFTP NLVQVYEELS LKGDFFVFI SDDRDAESFD AYFSKMPWLA
101 IPFSDQETCK HLKDLFKVRG IPNLVFLDAD GKVSCDQGVR FIREYGAEGY
151 PFTPERVEYF RQEEENAKKN QTLSSILVSS SRDFLISKDG TKIPVSELEG
201 KMGVLYFSVH SHRLCLDFTP RLEEVYKKLK EKGEKFEVVL ISMDYDENNF
251 KQGLETMPWL ALPFEDKSRE RLARYFELSA LPTLVIIGED GKTLNKNVAE
301 LIEGHGIQAY PFTPEKLVEL AEIEKARLEA QTLESVLVHG DKDFVIEESG
351 SKVPVSELVG KNILLYFSAK WCPPCRAFLP KLIEAYHEIK AKDNAFEIIF
401 ISSDRDQSSF DEFYTEMPWL ALPFGDDRKT ILQRKFKIKG IPAAIAISPT
451 GKTLTKEARE HITAYGADAY PFNEDHLKQL NDKQEEIAKG WPEKVRHELH
501 PEHELVRMKR NGYGCDGCKE AGSGWSFYCK KCDFDLHPKC ALKKEENGEK
551 VKK
```

Spot No.: **D52**

NCBI accession No.: **gi|14423933** Species: *Hevea brasiliensis*

Protein name: **Small rubber particle protein** PFF score: **[137]**

Matched peptides No.: **[2]** Sequence coverage %: **[16]**

Matched sequences: **K.QVSAQTY SVAQDAPR.I;**

**K.DISGPLKPGVDTIENVVK.T**

Calculated Mr: **22331**

Calculated pI: **4.80**

### Probability Based Mowse Score:

Ions score is  $-10 \cdot \log(P)$ , where P is the probability that the observed match is a random event. Individual ions scores  $> 46$  indicate identity or extensive homology ( $p < 0.05$ ). Protein scores are derived from ions scores as a non-probabilistic basis for ranking protein hits.

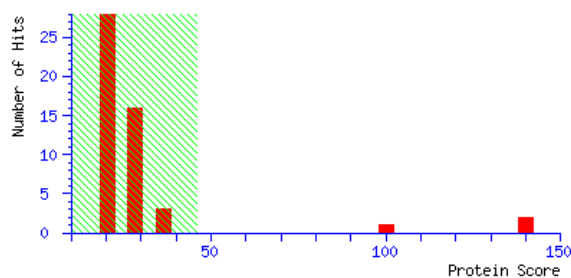

Matched peptide sequences: shown in **Bold Red**:

```
1 MAEEVEEERL KYLDFVRAAG VYAVDSFSTL YLYAKDISGP LKPGVDTIEN
51 VVKTVVTPVY YIPLEAVKFV DKTVDVSVTS LDGVVPPVIK QVSAQTY SVA
101 QDAPRIVLDV ASSVFNTGVQ EGAKALYANL EPKAEQYAVI TWRALNKLPL
151 VPQVANVVVP TAVYFSEKYN DVVRGTEQG YRVSSYLPLL PTEKITKVFQ
201 DEAS
```



Spot No.: **D53**

NCBI accession No.: **gi|333690873** Species: *Hevea brasiliensis*

**PFF** score: **[132]**

Protein name: **Small rubber particle protein**

Matched peptides No.: **[4]** Sequence coverage %: **[18]**

Matched sequences: **R.FWADFIDKK.I;**  
**K.YEYREEDLR.N;**  
**K.SPFLPSDPYQR.A;**  
**K.SPLLLQMNVPVHK.K + Oxidation (M)**

Calculated Mr: **25595**

Calculated pI: **5.48**

Probability Based Mowse Score:

Ions score is  $-10 \cdot \log(P)$ , where P is the probability that the observed match is a random event. Individual ions scores  $> 46$  indicate identity or extensive homology ( $p < 0.05$ ). Protein scores are derived from ions scores as a non-probabilistic basis for ranking protein hits.

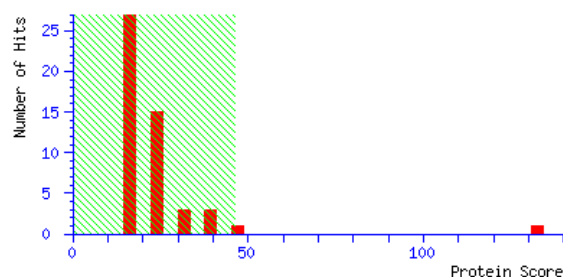

Matched peptide sequences: shown in **Bold Red**:

```
1 MAEEVILLDF WSPFGRMRV IALAEKGVKY EYREEDLRNK SPLLLQMNVP
51 HKIPVLIHN GKPICESLIA VQYVDEVWKD KSPFLPSDPY QRAQARFWAD
101 FIDKKIYDIG RKIWTTKGDE QEAAKKEFIE ALKLELGEIG NKPYFGGESH
151 GYVDVALIPF YSWFYAYETC GNFSIEPECP VLIAWAKRCL QKESVSESVP
201 DPEKVYEFVL VLKKKFGIE
```

Spot No.: **D54**

NCBI accession No.: **gi|356543702** Species: *Glycine max*

**PFF** score: **[105]**

Protein name: **PREDICTED: (+)-pulegone reductase-like**

Matched peptides No.: **[1]** Sequence coverage %: **[4]**

Matched sequences: **K.YFPDGIDVYLDNVGGK.M**

Calculated Mr: **38361**

Calculated pI: **5.71**

### Probability Based Mowse Score:

Ions score is  $-10 \cdot \log(P)$ , where P is the probability that the observed match is a random event. Individual ions scores  $> 46$  indicate identity or extensive homology ( $p < 0.05$ ). Protein scores are derived from ions scores as a non-probabilistic basis for ranking protein hits.

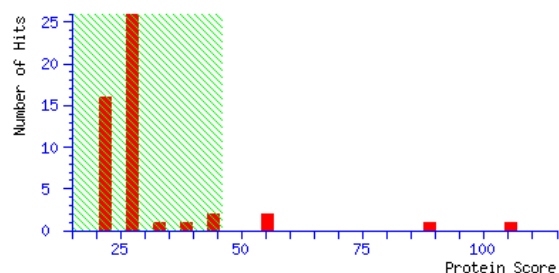

Matched peptide sequences: shown in **Bold Red**:

```
1  MGSVVESREW YLAAYSPHGV PNSDNLKLRT VALSLSSDSI PDGHVSLQIL
51 FLSVDPYLRT RLTGTL DGLY IQQYPLNEVI TAYGVGRVIG SKDSKYTEGD
101 LILTPSAPVA EYCILPSSRV IRKIDAASGI SLPDYLSALG VPGFAAWVGI
151 VVLGDPKPGS NVFISAASGA VGMSAGQLAK IRGCRVIGST GSDEKVKLIK
201 EEFYDDGFN YNKESDFDAA LSKYFPDGID VYLDNVGGKM LESVLNHVNK
251 YARIPLCGMI SQYNKVTWTER EGVRNLLNMV GKEVRMEGFM LESYWHRFED
301 FAKEMEGYIK EGKVT SKNKI NIGIESFLDS LASLFSSSNI GKVVVQVNKA
```

Spot No.: **D55**

NCBI accession No.: **gi|351721881** Species: *Glycine max*

**PFF** score: **[56]**

Protein name: **18.5 kDa class I heat shock protein**

Matched peptides No.: **[3]** Sequence coverage %: **[16]**

Matched sequences: **R.ENS**AFVSTR.V;  
**K.ETPEAHVFK**.A;  
**K.EDKNDTWHR**.V

Calculated Mr: **18491**

Calculated pI: **5.82**

### Probability Based Mowse Score:

Ions score is  $-10 \cdot \log(P)$ , where P is the probability that the observed match is a random event. Individual ions scores > 45 indicate identity or extensive homology ( $p < 0.05$ ). Protein scores are derived from ions scores as a non-probabilistic basis for ranking protein hits.

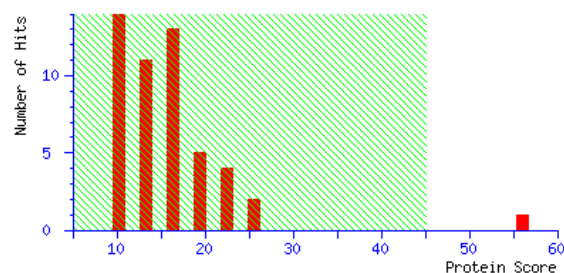

Matched peptide sequences: shown in **Bold Red**:

```
1  MSLIPNFFGG  RRNVFDPFS  LDVWDPFKDF  PFPNTLSSAS  FPEFSRENSA
51 FVSTRVDWKE TPEAHVFKAD IPGLKKEEVK  VQIEDDKVLQ  ISGERNVEKE
101 DKNDTWHRVE RSSGKFMRRF  RLPENAKVEQ  VKASMENGVL  TVTVPKEEVK
151 KPDVKAIEIS  G
```

Spot No.: **D56**

NCBI accession No.: **gi|462406561** Species: *Prunus persica*

**PFF** score: **[96]**

Protein name: **hypothetical protein PRUPE\_ppa020028mg, partial**

Matched peptides No.: **[2]** Sequence coverage %: **[5]**

Matched sequences: **R.VDYQGYIFPR.R;**  
**K.QEQAAFIEEISR.T**

Calculated Mr: **48394**

Calculated pl: **5.02**

### Probability Based Mowse Score:

Ions score is  $-10 \cdot \log(P)$ , where P is the probability that the observed match is a random event. Individual ions scores  $> 46$  indicate identity or extensive homology ( $p < 0.05$ ). Protein scores are derived from ions scores as a non-probabilistic basis for ranking protein hits.

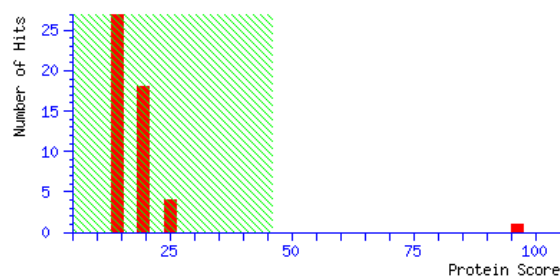

Matched peptide sequences: shown in **Bold Red**:

```
1  MEGLIKGLID  VALGHDENRN  EDPGPRDRQE  QSRSTWAQVV  SGEEQDENDS
51  DRPHGSKQSH  WNRQEQSHLG  RAEWDNVDSE  PSRRPHKAAH  EGYERNDDGG
101 RHGYNQNYSR  RKDEEENKDG  WETVGKRPPR  QQPHKIQMGQ  WNGYKRPSTE
151 QEYSDEAEVG  AKIEPSEEEL  SDLSQACSKI  WELDLNRLVP  GKDYEIDCGG
201 GKKVYQKEDL  AEGSLFTWLS  EDIFRRPTFS  RFCSLLDNYN  PNEGCKEVIT
251 SEEKQEQAAF IEEISRTAPI  KYLHKYLSRK  GILSESYQDF  KRTLTTLWFD
301 LYGRGGASAS  SSAFEHVFVG  EIKQRGEEEV  SGFHNWLQFY  LEEAKGRVDY
351 QGYIFPRRRG  QTPDSETQLL  TIQFEWNGVL  KAVSSTLVGV  SPEFEIALYT
401 LCFFMGGEDN  HIELGPYQ
```

Spot No.: **D57**

NCBI accession No.: **gi|255570177** Species: *Ricinus communis*

**PFF** score: **[56]**

Protein name: **proteasome subunit beta type 7,10, putative**

Matched peptides No.: **[1]** Sequence coverage %: **[3]**

Matched sequences: **R.EGLNRDEGIK.L**

Calculated Mr: **30600**

Calculated pI: **7.60**

### Probability Based Mowse Score:

Ions score is  $-10 \cdot \log(P)$ , where P is the probability that the observed match is a random event. Individual ions scores  $> 46$  indicate identity or extensive homology ( $p < 0.05$ ). Protein scores are derived from ions scores as a non-probabilistic basis for ranking protein hits.

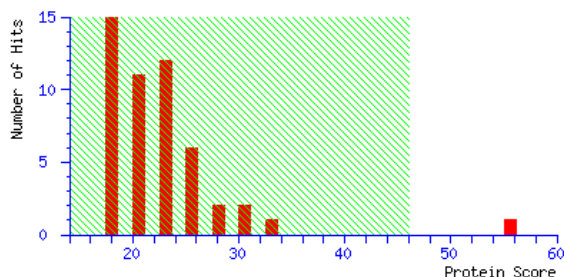

Matched peptide sequences: shown in **Bold Red**:

```
1 MSKSAIDVPP KGGFSFDLCK RNEMLAKKGV NLPSSYRKTG TTIVGLIFQD
51 GVILGADTRA TEGPIVCDKN CEKIHYPAPN IYCCGAGTAA DTEAVTDMVS
101 SQLQLHRYHT GRESRVITAL TLLKKHLFNY QGYVQAALVL GGVDCTGPHL
151 HTIYPHGSTD TLPFATMGSG SLAAMAIFES KYREGLNRDE GIKLVTEAIC
201 SGVFNDLGSG SNVDVCVITK GHKEYLRNHL LPNPRTYINP KGYVFSKKTE
251 VLLTKITPLK EPSKEKEGVS EGGEAMEE
```

Spot No.: **D58**

NCBI accession No.: **gi|3834310** Species: *Arabidopsis thaliana*

**PFF** score: **[197]**

Protein name: **Similar to Ubiquitin-conjugating enzyme E2-17 KD  
gb|D83004 from Homo sapiens**

Matched peptides No.: **[3]** Sequence coverage %: **[24]**

Matched sequences: **K.DKWSPALQIR.T;**  
**K.IYHPNIDKLGR.I;**  
**R.LLSEPAPGISASPSEDNMR.Y + Oxidation (M)**

Calculated Mr: **18339**

Calculated pI: **5.93**

Probability Based Mowse Score:

Ions score is  $-10 \cdot \log(P)$ , where P is the probability that the observed match is a random event. Individual ions scores  $> 46$  indicate identity or extensive homology ( $p < 0.05$ ). Protein scores are derived from ions scores as a non-probabilistic basis for ranking protein hits.

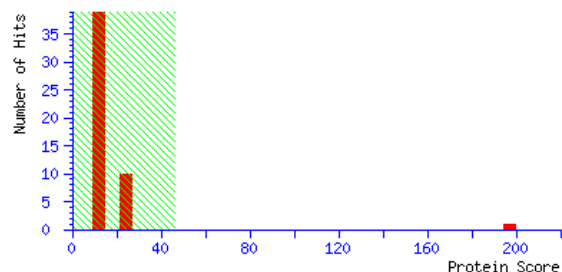

Matched peptide sequences: shown in **Bold Red**:

```
1  MANSNLPRI  IKETQRLLE PAPGISASPS  EDNMRYFNVM  ILGPTQSPYE
51  GGVEKLELFL  PEEYPMAAPK  VRFLTKIYHP  NIDKLGRICL  DILKDKWSPA
101 LQIRTVLLRS  IQALLSAPNP  DDPLSENIAK  HWKSNEAEAV  DTGDLRNGPV
151  FMQAAHDKLE  GEN
```

Spot No.: **D59**

NCBI accession No.: **gi|315937232** Species: *Jatropha curcas*

**PFF** score: **[256]**

Protein name: **ubiquitin-conjugating family protein**

Matched peptides No.: **[6]** Sequence coverage %: **[48]**

Matched sequences: **K.KEMAAPHNR.K + Oxidation (M);**

**K.FGLLANWQR.E;**

**M.TLGSGGSSVVVPR.N;**

**R.KLVQPPEGTYF.-;**

**R.EYTMEDILTQLK.K + Oxidation (M);**

**R.SWTGTIIGPHNTVHEGR.I**

Calculated Mr: **16706**

Calculated *pI*: **6.20**

Probability Based Mowse Score:

Ions score is  $-10 \cdot \log(P)$ , where *P* is the probability that the observed match is a random event. Individual ions scores > 46 indicate identity or extensive homology ( $p < 0.05$ ). Protein scores are derived from ions scores as a non-probabilistic basis for ranking protein hits.

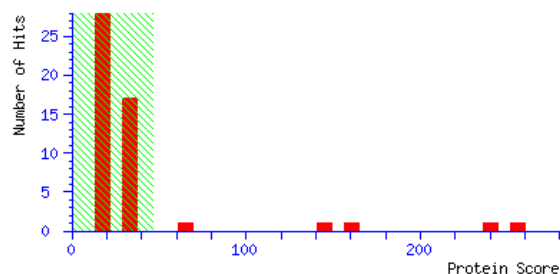

Matched peptide sequences: shown in **Bold Red**:

**1** **MTLGSGGSSV** **VVPRNFRLL** **ELERGEKGIG** **DGTVSYGMDD** **GDDIYMR****SWT**  
**51** **G****TIIGPHNTV** **HEGRIYQLKL** **FCDKDYPEKP** **PSVRFHSRIN** **MTCVNHEIGV**  
**101** **VEPKK****FGLLA** **NWQREYTMED** **ILTQLKKEMA** **APHNRKLVQP** **PEGTYF**

Spot No.: **D60**

NCBI accession No.: **gi|226531470** Species: *Zea mays*

**PFF** score: **[271]**

Protein name: **vacuolar ATP synthase subunit B**

Matched peptides No.: **[8]** Sequence coverage %: **[20]**

Matched sequences: **K.YQEIVNIR.L;**

**K.TLDQYYSR.D;**

**K.FVTQGAYDTR.N;**

**R.RGQVLEVDGEK.A;**

**R.QIYPPINVLPSLSR.L;**

**R.VTLFLNLANDPTIER.I;**

**R.GYPGYMYTDLATYIER.A + Oxidation (M);**

**K.IPLFSAAGLPHNEIAAQICR.Q**

Calculated Mr: **54142**

Calculated pI: **5.07**

Probability Based Mowse Score:

Ions score is  $-10 \cdot \log(P)$ , where P is the probability that the observed match is a random event. Individual ions scores  $> 46$  indicate identity or extensive homology ( $p < 0.05$ ). Protein scores are derived from ions scores as a non-probabilistic basis for ranking protein hits.

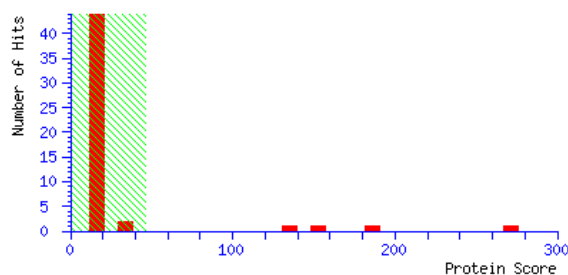

Matched peptide sequences: shown in **Bold Red**:

```
1  MGLVKEGVDM  EEGTLEIGME  YRTVSGVAGP  LVILDKVKGP  KYQEIVNIRL
51  GDGTTRRGQV  LEVDGEKAVV  QVFEGTSGID  NKYTTVQFTG  EVLKTPVSLD
101 MLGRIFNGSG  KPIDNGPPIL  PEAYLDISGS  SINPSERTYP  EEMIQTGIST
151 IDVMNSIARG  QKIPLFSAAG  LPHNEIAAQI  CRQAGLVKTL  EKGKHAEGGE
201 DDNFAIVFAA  MGVNMETAQF  FKRDFEENG  MERVTLFLNL  ANDPTIERII
251 TPRIALTAE  YLAYECGKHV  LVILDTMSSY  ADALREVSAA  REEVPGRRGY
301 PGYMYTDLAT  IYERAGRIEG  RTGSITQIPI  LTMPNDDITH  PTPDLTGYIT
351 EGQIYIDRQL  HNRQIYPPIN  VLPSLSRLMK  SAIGEGMTRR  DHSVSNQLY
401 ANYAIGKDVQ  AMKAVVGEEA  LSSEDLLYLE  FLDKFERKFV  TQGAYDTRNI
451 FQSLDLAWTL  LRIFPRELLH  RIPAKTLDQY  YSRDASH
```



Spot No.: **D61**

NCBI accession No.: **gi|2832430** Species: *Hevea brasiliensis*

**PFF** score: **[175]** Protein name: **prohevein**

Matched peptides No.: **[3]** Sequence coverage %: **[22]**

Matched sequences: **K.CLSVTNTGTGAK.A;**

**R.QLDTDGKGYER.G;**

**K.YGWTAFCGPVGAHGQPSCGK.C**

Calculated Mr: **20852**

Calculated pI: **5.64**

### Probability Based Mowse Score:

Ions score is  $-10 \cdot \log(P)$ , where P is the probability that the observed match is a random event. Individual ions scores  $> 46$  indicate identity or extensive homology ( $p < 0.05$ ). Protein scores are derived from ions scores as a non-probabilistic basis for ranking protein hits.

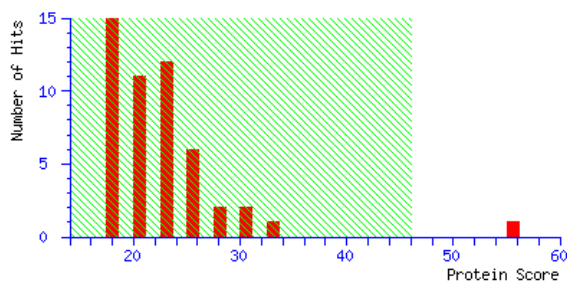

Matched peptide sequences: shown in **Bold Red**:

```
1 MSKSAIDVPP KGGFSFDLCK RNEMLAKKGV NLPSSYRKTG TTIVGLIFQD
51 GVILGADTRA TEGPIVCDKN CEKIHYPAPN IYCCGAGTAA DTEAVTDMVS
101 SQLQLHRYHT GRESRVITAL TLLKKHLFNY QGYVQAALVL GGVDCTGPHL
151 HTIYPHGSTD TLPFATMGSG SLAAMAIFES KYREGLNRDE GIKLVTEAIC
201 SGVFNDLGSG SNVDVCVITK GHKEYLRNHL LPNPRTYINP KGYVFSKITE
251 VLLTKITPLK EPSKEKEGVS EGGEAMEE
```

Spot No.: **D62**

NCBI accession No.: **gi|114199044** Species: *Malus x domestica*

**PFF** score: **[195]**

Protein name: **caffeic acid O-methyltransferase**

Matched peptides No.: **[4]** Sequence coverage %: **[12]**

Matched sequences: **R.TLPDGKVER.L;**

**R.TEKEFEALAK.G;**

**R.VLASYSILTYSLR.T;**

**K.AYGMTAFEYHGTDPR.F + Oxidation (M)**

Calculated Mr: **40047**

Calculated pI: **5.54**

Probability Based Mowse Score:

Ions score is  $-10 \cdot \log(P)$ , where P is the probability that the observed match is a random event. Individual ions scores  $> 45$  indicate identity or extensive homology ( $p < 0.05$ ). Protein scores are derived from ions scores as a non-probabilistic basis for ranking protein hits.

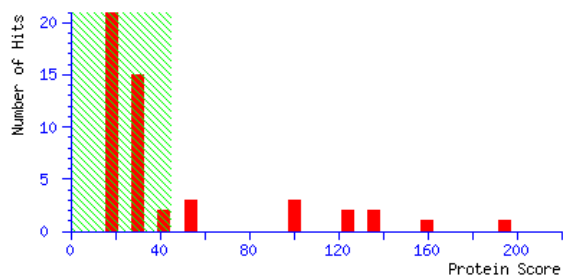

Matched peptide sequences: shown in **Bold Red**:

```
1  MGSTPETQMT  PTQVSDEEAN  LFAMQLASAS  VLPMLKAAI  ELDLLEIMAK
51  AGPGAFFVSPA  DLSSQLPTKN  PDAPVMLDRM  LRVLASYSIL  TYSRLTLPDG
101 KVERLYGLGP  VCKFLTKSVD  GASIGSLCLM  NQDKVLMESW  YNLKDAVLEG
151  GIPFNKAYGM  TAFEYHGTDP  RFNRVFNKGM  ADHSTITMKK  LLENYNGFEG
201  LTIIVDVGGG  TGAVLNMIVS  KYPSIKGINF  DLPHVIEDAP  QYPGVEHVGG
251  DMFVSVPKGD  AIFMKWICHD  WSDEHCLKFL  KNCYAALPDN  GKVIVAECIL
301  FVAPDSSLAT  KGVVHIDAIM  LAHNPPGKER  TEKEFEALAK  GSGFQGFRVV
351  CSAFNTYAIE  FLKKN
```

Spot No.: **D63**

NCBI accession No.: **gi|255538084** Species: *Ricinus communis*

**PFF** score: **[77]**

Protein name: **Adenine phosphoribosyltransferase, putative**

Matched peptides No.: **[1]** Sequence coverage %: **[7]**

Matched sequences: **R.ALVIDDLIATGGTLCAAIR.L**

Calculated Mr: **27683**

Calculated pI: **8.33**

### Probability Based Mowse Score:

Ions score is  $-10 \cdot \log(P)$ , where P is the probability that the observed match is a random event. Individual ions scores  $> 46$  indicate identity or extensive homology ( $p < 0.05$ ). Protein scores are derived from ions scores as a non-probabilistic basis for ranking protein hits.

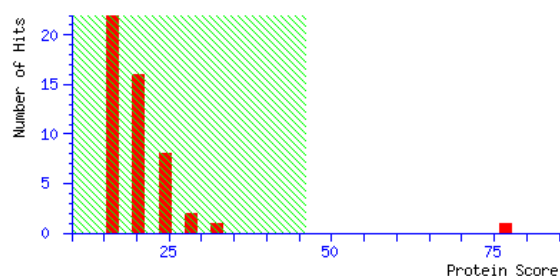

Matched peptide sequences: shown in **Bold Red**:

```
1  MLKSIHLRAP  NSILPSRQLS  PPSPNKQLSA  RIVIAAPSTG  QQAPSISLRN
51  YPPARPSLRC  SAGGSDSQNQ  KMAAQDDKDN  RIERISSSIR  VIPDFPKPGI
101 LFQDITLLLL  DTKAFKDTID  LFVERYKERD  ISVVAGIEAR  GFIFGPPIAL
151 AIGAKFVPMR  KPNKLPGEVV  SEEYSLEYGT  DKMEMHVGAV  QAGERALVID
201 DLIATGGTLC AAIRLLERVG VEVVECACVI  ELPKLGRRER  LGQTPLFVLV
251  SSA
```

Spot No.: **D64**

NCBI accession No.: **gi|255546213** Species: *Ricinus communis*

**PFF** score: **[94]**

Protein name: **o-methyltransferase, putative**

Matched peptides No.: **[1]** Sequence coverage %: **[7]**

Matched sequences: **R.VQISHASLGDGITICR.R**

Calculated Mr: **25951**

Calculated pI: **5.55**

### Probability Based Mowse Score:

Ions score is  $-10 \cdot \log(P)$ , where P is the probability that the observed match is a random event. Individual ions scores  $> 46$  indicate identity or extensive homology ( $p < 0.05$ ). Protein scores are derived from ions scores as a non-probabilistic basis for ranking protein hits.

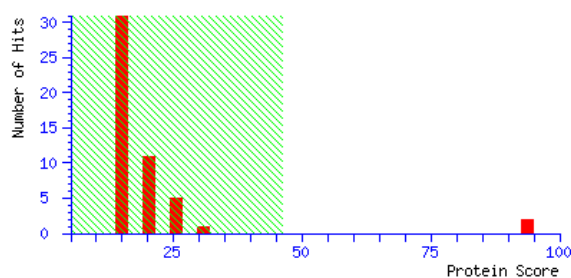

Matched peptide sequences: shown in **Bold Red**:

```
1  MQKGLLKSEE  LYQYVLETSV  FPREPEPLRE  LRNITANHPW  AKMATSPDAG
51  QFMAMLLQLV  NAKKTIEVGV  FTGYSLLLLTA  LSIPEDGKIV  AIDVDREAYE
101 IGLPIIRKAG  VEHKIDFMES  EALPVLDKLL  KEHGNESSFD  FAFVDADKIN
151 YWNYHERLLK  LVKVGIVIIY  DNSLWRGSVA  VPEEEAPEHL  RFCRQLTIEH
201 NKFLAADSRV  QISHASLGDG  ITICRRIC
```

Spot No.: **D65 (S3)**

NCBI accession No.: **gi|132270** Species: *Hevea brasiliensis*

Protein name: Rubber elongation factor protein; Short=REF;

AltName: Allergen=Hev b 1

Mascot score: **95**

Sequence coverage %: **56**

Matched peptides No.: **8**

Total peptides No.: **42**

Calculated Mr: **14713**

Calculated pI: **5.04**

Probability Based Mowse Score:

Protein score is  $-10 \cdot \log(P)$ , where P is the probability that the observed match is a random event. Protein scores greater than 73 are significant ( $p < 0.05$ ).



Matched peptide sequences: shown in **Bold Red**:

1 MAEDEDNQQG QGEGLKYLGF VQDAATYAVT TFSNVYLFAK **DKSGPLQPGV**  
51 **DIIEGPVKNV** AVPLYNRFSY IPNGALKFVD **STVVASVTII** DRSLPPIVKD  
101 **ASIQVVS AIR** APEAARSLA **SSLPGQTKIL** AKVFGYEN

Spot No.: **D66 (S5)**

NCBI accession No.: **gi|14423933** Species: *Hevea brasiliensis*

Protein name: Small rubber particle protein; Short=SRPP; AltName: Full=22 kDa rubber particle protein; Short=22 kDa RPP; AltName: Full=27 kDa natural rubber allergen; AltName: Full=Latex allergen Hev b 3

Mascot score: **122** Sequence coverage %: **85**

Matched peptides No.: **13** Total peptides No.: **55**

Calculated Mr: **22331** Calculated pI: **4.80**

Probability Based Mowse Score:

Protein score is  $-10 \cdot \log(P)$ , where P is the probability that the observed match is a random event. Protein scores greater than 73 are significant ( $p < 0.05$ ).



Matched peptide sequences: shown in **Bold Red**:

```
1 MAEEVEEERL KYLDFVRAAG VYAVDSFSTL YLYAKDISGP LKPGVDTIEN
51 VVKTVVTPVY YIPLEAVK FV DKTVDVSVTS LDGVVPPVIK QVSAQTY SVA
101 QDAPRIVLDV ASSVFNTGVQ EGAKALYANL EPKAEQYAVI TWRALNKLPL
151 VPQVANVVVP TAVYFSEKYN DVVRGTTEQG YRVSSYLPLL PTEKITK VFG
201 DEAS
```

Spot No.: **D67 (S6)**

NCBI accession No.: **gi|14423933** Species: *Hevea brasiliensis*

Protein name: Small rubber particle protein; Short=SRPP; AltName: Full=22 kDa rubber particle protein; Short=22 kDa RPP; AltName: Full=27 kDa natural rubber allergen; AltName: Full=Latex allergen Hev b 3

Mascot score: **135** Sequence coverage %: **75**

Matched peptides No.: **12** Total peptides No.: **31**

Calculated Mr: **22331** Calculated pI: **4.80**

Probability Based Mowse Score:

Protein score is  $-10 \cdot \log(P)$ , where P is the probability that the observed match is a random event. Protein scores greater than 73 are significant ( $p < 0.05$ ).



Matched peptide sequences: shown in **Bold Red**:

```
1 MAEEVEEERL KYLDFVRAAG VYAVDSFSTL YLYAKDISGP LKPGVDTIEN
51 VVKTVVTPVY YIPLEAVK FV DKTVDVSVTS LDGVVPPVIK QVSAQTY SVA
101 QDAPRIVLDV ASSVFN TGVQ EGAKALYANL EPKAEQYAVI TWRALNKLPL
151 VPQVANVVVP TAVYFSEKYN DVVRGTTEQG YRVSSYLPLL PTEKITK VFG
201 DEAS
```

Spot No.: **D68 (S9)**

NCBI accession No.: **gi|388503664** Species: *Lotus japonicus*

Protein name: **unknown**

Mascot score: **93**

Sequence coverage %: **45**

Matched peptides No.: **13**

Total peptides No.: **48**

Calculated Mr: **29537**

Calculated pl: **4.79**

Probability Based Mowse Score:

Protein score is  $-10 \cdot \log(P)$ , where P is the probability that the observed match is a random event. Protein scores greater than 73 are significant ( $p < 0.05$ ).

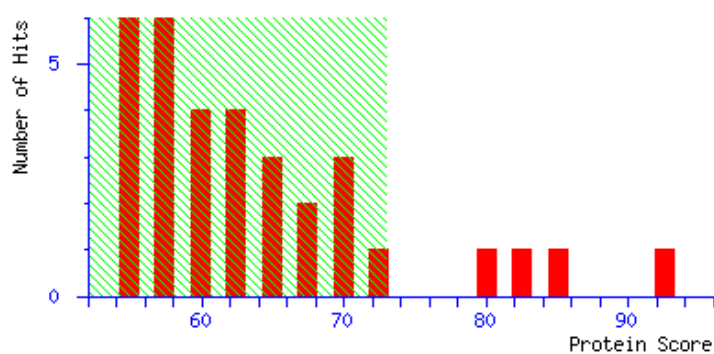

Matched peptide sequences: shown in **Bold Red**:

```
1  MASSKDRGTF VYVAKLAEQA ERYEEMVDSM KKVANLDVEL TVEERNLLSV
51 GYKNVIGARR ASWRILSSIE QKEETKGNDV NAKRIKEYRQ KVESELADIC
101 NDVMRVIDEH LIPSATAGES TVFYKMKGD YYRYLAEFKS GNEKKEAADQ
151 SMKAYESATT AAEALPPTH PIRLGLALNF SVFYYEILNS PERACHLAKQ
201 AFDEAISELD TLNEESYKDS TLIMQLLRDN LTLWTSDIPE EGEDSLKAND
251 TAKVGGGEDA E
```



Spot No.: Spot No.: **D69 (S13)**

NCBI accession No.: **gi|4235430** Species: *Hevea brasiliensis*

Protein name: **latex-abundant protein**

Mascot score: **96**

Sequence coverage %: **54**

Matched peptides No.: **15**

Total peptides No.: **37**

Calculated Mr: **46443**

Calculated pI: **5.01**

Probability Based Mowse Score:

Protein score is  $-10 \cdot \log(P)$ , where P is the probability that the observed match is a random event. Protein scores greater than 73 are significant ( $p < 0.05$ ).



Matched peptide sequences: shown in **Bold Red**:

```
1  MAKKAVLIGI  NYPGTKAELK  GCINDVKRMY  RCLVDRYGFS  EEDITVVLIDI
51  DESYIQPTGK  NIRRVLTDLV  RSAEPGDLLF  VHYSGHGTRL  PAETGEDDDT
101 GFDECIVPCD  MNLITDDDFR  EFVDQVPHGC  RITVVSDSCH  SGGLIDEAKE
151 QIGESTKRKE  EESESGFGFK  SFLKQTIQDA  FESRGVHLPS  DLHHHHGHRD
201 EEDFDNRVVE  EDYGDSGYVK  SKSLPLSTLI  EILKQKTGKD  DIDVGKLRPT
251 LFDMPGDDAS  PKVKKFMKVI  LNKLRHGDGE  SGGGGFLGMV  GSLAQEFLKH
301 KLDENDESIV  KPALETEVDS  KQEVYAGKTK  RSLPDGGILI  SGCQTDQ TSA
351 DASPSGKSSE  AYGALSNAIQ  TIIAETDGAV  TNQELVLKAR  KMLKKQGFTQ
401 KPGLYCSDDH  VEASFVC
```

Spot No.: **D70 (S20)**

NCBI accession No.: [gi|30575570](#) Species: *Citrus x paradisi*

**PFF** score: **[86]** Protein name: HSP19 class II, partial

Matched peptides No.: **[1]** Sequence coverage %: **[15]**

Matched sequences: [K.VQVEDDNVLLISGER.K;](#)

Calculated Mr: **11191**

Calculated pI: **8.01**

Probability Based Mowse Score:

Ions score is  $-10 \cdot \log(P)$ , where P is the probability that the observed match is a random event. Individual ions scores  $> 44$  indicate identity or extensive homology ( $p < 0.05$ ). Protein scores are derived from ions scores as a non-probabilistic basis for ranking protein hits.

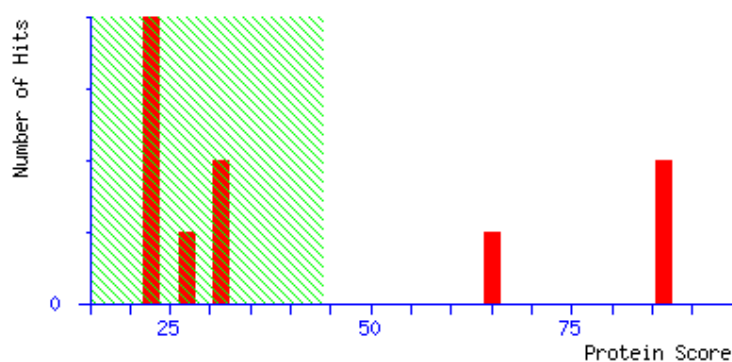

Matched peptide sequences: shown in **Bold Red**:

```
1 YVFIVDMPGL KSGDIKVQVE DDNVLLISGE RKREEEKDGA KYVRMERRVG  
51 KFMRKFLVPE NANVEAISAV CQDGVLTITV DKLPPPEPKK PKTIEVKIA
```

Spot No.: **D71 (S22)**

NCBI accession No.: [gi|37806305](#)

Species: *Oryza sativa Japonica Group*

PFF score: **[60]** Protein name: [hypothetical protein](#)

Matched peptides No.: **[2]** Sequence coverage %: **[3]**

Matched sequences: [K.LGTLVLGDRPRL](#) ; [K.LGTLVLGDRPRL](#)

Calculated Mr: **35105**

Calculated pI: **8.29**

Probability Based Mowse Score:

Ions score is  $-10 \cdot \log(P)$ , where  $P$  is the probability that the observed match is a random event. Individual ions scores  $> 45$  indicate identity or extensive homology ( $p < 0.05$ ). Protein scores are derived from ions scores as a non-probabilistic basis for ranking protein hits.

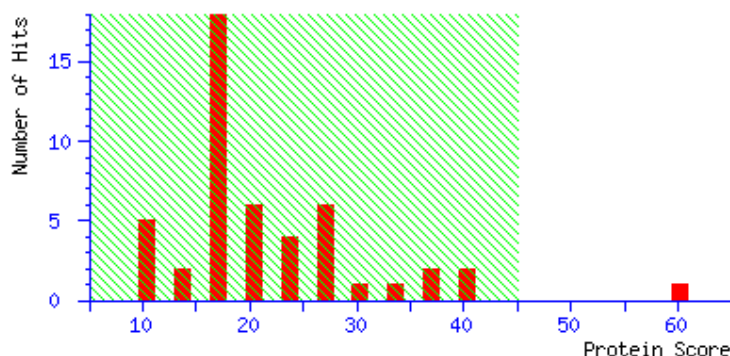

Matched peptide sequences: shown in **Bold Red**:

```
1 MEVFQGVQFA RLRNWEETY VTADEDGRSV YHYAPDRHRP AHEAIWAVQM
51 VLAGAPPTQY VLLRGAYGRY LGAPDAVRR WPLSCCWPAP VVGQRDFDQP
101 EVDAIMWRAV RRADHVLCLH DKSGRYLRGK LGTLVLGDRP RLTVGDGRLN
151 DDEKALRWEV LPVLPNPGRP ELPISIVPEA DLVGRLVKAC FLPLQREIQF
201 VEADDDGNIG EGQEVWDSFQ YEGRSVQLLR NELEDRVGYA ITVCVRAGRH
251 GQHSPLLINL PHSRETLHIV VLRRNSEADN QLTFFDPKAS SRRRYRHRRR
301 AIIQ
```

Spot No.: **D72 (S26)**

NCBI accession No.: [gi|3451147](#) Species: *Hevea brasiliensis*

**PFF** score: **[56]** Protein name: **chitinase**

Matched peptides No.: **[1]** Sequence coverage %: **[4]**

Matched sequences: [K.VYLTAAPQCPFPDR.Y](#)

Calculated Mr: **34138**

Calculated pI: **8.72**

Probability Based Mowse Score:

Ions score is  $-10 \cdot \log(P)$ , where P is the probability that the observed match is a random event.

Individual ions scores  $> 44$  indicate identity or extensive homology ( $p < 0.05$ ).

Protein scores are derived from ions scores as a non-probabilistic basis for ranking protein hits.

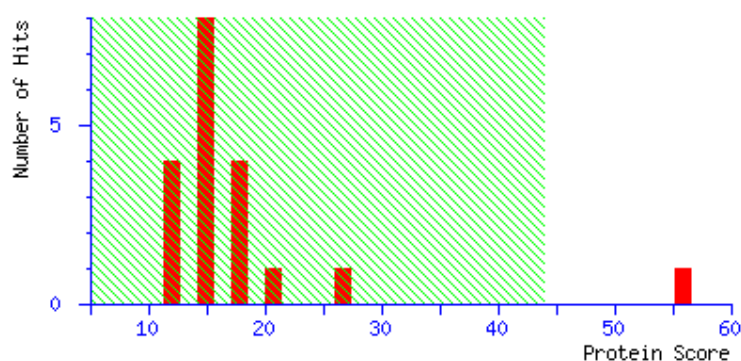

Matched peptide sequences: shown in **Bold Red**:

```
1  MAKRTQAILL  LLLAISLIMS  SSHVDGGGIA  IYWGQNGNEG  TLTQTCSTRK
51  YSYVNIAFLN  KFGNGQTPQI  NLAGHCNPAA  GGCTIVSNGI  RSCQIQGIKV
101 MLSLGGGIGS  YTLASQADAK  NVADYLWNNF  LGGKSSSRPL  GDAVLGDIDF
151 DIEHGSTLYW  DDLARYLSAY  SKQGKKVYLT  AAPQCPFPDR  YLGTALNTGL
201 FDYVWVQFYN  NPPCQYSSGN  INNIINSWNR  WTTSINAGKI  FLGLPAAPEA
251 AGSGYVPPDV  LISRILPEIK  KSPKYGGVML  WSKFYDDKNG  YSSSIRDSVL
301 FLHSEKMTV  L
```

Spot No.: **D73 (S30)**

NCBI accession No.: **gi|255540341** Species: *Ricinus communis*

Protein name: **glyceraldehyde 3-phosphate dehydrogenase, putative**

Mascot score: **86**

Sequence coverage %:**42**

Matched peptides No.: **14**

Total peptides No.: **57**

Calculated Mr: **36930**

Calculated pI: **7.10**

Probability Based Mowse Score:

Protein score is  $-10 \cdot \log(P)$ , where P is the probability that the observed match is a random event. Protein scores greater than 73 are significant ( $p < 0.05$ ).



Matched peptide sequences: shown in **Bold Red**:

1 **MAKIKIGING** **FGRIGRLVAR** **VALQRDDVEL** VAVNDPFIST EYMTYMFKYD  
51 **TVHGQWKHHE** LKIKDDKILL FGEKPVTVFG VRNPEEIPWA **ETGAEYIVES**  
101 **TGVFTDKDKA** AAHLKGGAKK VIISAPSKDA **PMFVVGVNEK** EYTPDLHIIS  
151 NASCTTNCLA PLAKVINDRF GIVEGLMTTV HSITATQKTV **DGPSMKDWRG**  
201 **GRAASFNIIP** **SSTGAAKAVG** **KVLPSLNGKL** **TGMSFRVPTV** **DVSVDLTVR**  
251 LEKSATYEQI **KAAIKEESEG** **KLKGILGYTE** DDVVSTDFIG DKRSSIFDAK  
301 **AGIALNDKFFV** **KLVSWYDNEW** **GYSTRVVDLI** VHVASVH

Spot No.: **D74 (S35)**

NCBI accession No.: **gi|3288200** Species: *Hevea brasiliensis*

**PFF** score: [81]

Protein name: **latex allergen**

Matched peptides No.: [2] Sequence coverage %: [4]

Matched sequences: **R.DTYDPIHSIGPIYDGEYLR.E;**

**R.DTYDPIHSIGPIYDGEYLR.E**

Calculated Mr: **43020**

Calculated pI: **5.00**

Probability Based Mowse Score:

Ions score is  $-10 \cdot \log(P)$ , where P is the probability that the observed match is a random event.

Individual ions scores  $> 43$  indicate identity or extensive homology ( $p < 0.05$ ).

Protein scores are derived from ions scores as a non-probabilistic basis for ranking protein hits.

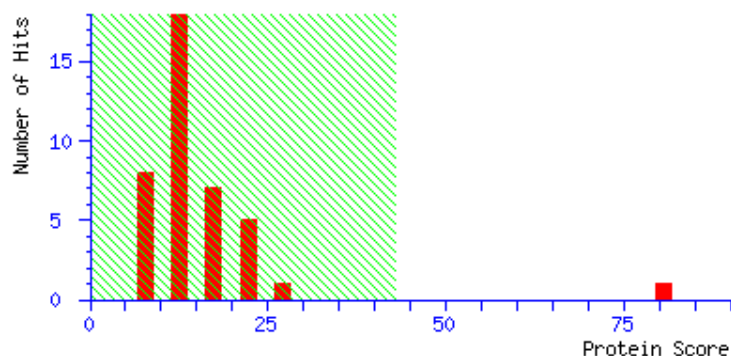

Matched peptide sequences: shown in **Bold Red**:

```
1 MATGSTITLQ GKKITVLSID GGGIRGIIPG IILASLESKL QDLGPDARI
51 ADYFDIIAGT STGGLITTML TAPNEDKKPI YQAKDIKDFY LENCPIKIFK
101 ESRDTYDPIH SIGPIYDGEY LRELCNLLK DLTVKDTLTD VIIPAFDIKL
151 LLPVIFSSDD AKCNALKNAR LADVCISTSA APVLLPAHSF TTEDDKNIHT
201 FELIDGGVAA ANPTLLALH IRNEIIRQNP RFIGANLTES KSRLVLSLGT
251 GKSEYKEKYN ADMTSKWRLY NWALYNGNSP AVDIFSNASS DMVDFHLSAL
301 FKSLDCEDYY LRIQDDITLG EESSGHIATE ENLQRLVEIG TELLEKQESR
351 INLDTGRLES IPGAPTNEAA IAKFAKLLSE ERKLRQLK
```

Spot No.: **D75 (S36)**

NCBI accession No.: **gi|1916805** Species: *Hevea brasiliensis*

**PFF** score: [138]

Protein name: **latex patatin homolog**

Matched peptides No.: [2] Sequence coverage %: [8]

Matched sequences: **K.SLDCEDYYLR.I;**

**R.IQDDTLTGEESSGHIAATEENLQR.L**

Calculated Mr: **43035**

Calculated pI: **5.00**

Probability Based Mowse Score:

Ions score is  $-10 \cdot \log(P)$ , where P is the probability that the observed match is a random event.

Individual ions scores  $> 44$  indicate identity or extensive homology ( $p < 0.05$ ).

Protein scores are derived from ions scores as a non-probabilistic basis for ranking protein hits.



Matched peptide sequences: shown in **Bold Red**:

```
1 MATGSTTLTQ GKKITVLSID GGGIRGIIPG IILASLESKL QDLDGPDARI
51 ADYFDIIAGT STGGLITTML TAPNEDKKPM YQAKDIKDFY LENCPIKIFPK
101 ESRDNYDPIH SIGPIYDGEY LRELCNNLLK DLTVKDTSTD VIIPTFDIKL
151 LLPVIFPSDD AKCNALKNAR LADVCIESTA APVLLPAHSF TTEDDKNIHT
201 FELIDGGVAA TNPTLLALTH IRNEIIRQNP RFIGANLTES KSRLVLSLGT
251 GKSEYKEKYN ADMTSKWRLY NWALYNGNSP AVDIFSNASS DMVDSHLSAL
301 FKSLDCEDYY LRIQDDTLTG EESSGHIAE ENLQRLVEIG TELLEKQESR
351 INLDTGRLES IPGAPTNEAA IAKFAKLLSE ERKLRQLK
```



Spot No.: **D76 (S37)**

NCBI accession No.: **gi|41581137** Species: *Hevea brasiliensis*

Protein name: **putative latex allergen hev b 7.02**

**PMF** score: **152**

Sequence coverage %: **44**

Matched peptides No.: **16**

Total peptides No.: **39**

Calculated Mr: **43027**

Calculated pI: **5.12**

Probability Based Mowse Score:

Protein score is  $-10 \cdot \log(P)$ , where P is the probability that the observed match is a random event. Protein scores greater than 73 are significant ( $p < 0.05$ ).

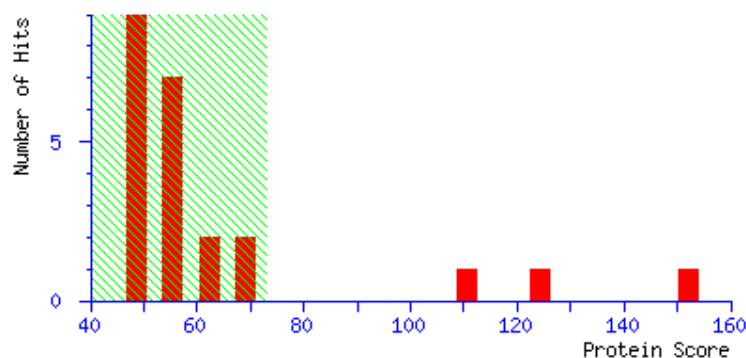

Matched peptide sequences: shown in **Bold Red**

```
1  ATGSTTLTQG  KKITVLSIDG  GGIRGIIPGI  ILASLESKLQ  DLDGPDARIA
51  DYFDIIAGTS  TGGLITTMLT  APNEDKKPMY  QAKDIKDFYL  ENCPKIFPKE
101 SRDNYDPIHS  IGPIYDGEYL  RELCNLLKD  LTVKDTLTDV  IIPTFDIKLL
151 LPVIFSSDDA  KCNALKNARL  ADVCISTSAA  PVLLPAHSFT  TEDDKNIHTF
201 ELIDGGVAAT  NPTLLALTHI  RNEIIRQNPR  FIGANLTESK  SRLVLSLGTG
251 KSEYKEKYNA  DMTSKWRLYN  WALYNGNSPA  VDIFSNASSD  MVDFHLSALF
301 KSLDCEDYYL  RIQDDTLTGE  ESSGHIATEE  NLQRLVEIGT  RLEKQESRI
351 NLDTGRLESI  PGASTNEAAI  TKFAKLLSEE  RKLRQLK
```



Spot No.: **D77 (S38)**

NCBI accession No.: **gi|41581137** Species: *Hevea brasiliensis*

Protein name: **putative latex allergen hev b 7.02**

**PMF** score: **142**

Sequence coverage %: **42**

Matched peptides No.: **15**

Total peptides No.: **51**

Calculated Mr: **43027**

Calculated *pI*: **5.12**

Probability Based Mowse Score:

Protein score is  $-10 \cdot \log(P)$ , where P is the probability that the observed match is a random event. Protein scores greater than 73 are significant ( $p < 0.05$ ).



Matched peptide sequences: shown in **Bold Red**

```
1  ATGSTTLTQG  KKITVLSIDG  GGIRGIIPGI  ILASLESKLQ  DLDGPDARIA
51  DYFDIIAGTS  TGGLITTMLT  APNEDKKPMY  QAKDIKDFYL  ENCPKIFPKE
101  SRDNYDPIHS  IGPIYDGEYL  RELCNNLLKD  LTVKDTLTDV  IIPTFDIKLL
151  LPVIFSSDDA  KCNALKNARL  ADVCISTSAA  PVLLPAHSFT  TEDDKNIHTF
201  ELIDGGVAAT  NPTLLALTHI  RNEIIRQNPR  FIGANLTESK  SRLVLSLGTG
251  KSEYKEKYNA  DMTSKWRLYN  WALYNGNSPA  VDIFSNASSD  MVDFHLSALF
301  KSLDCEDYYL  RIQDDTLTGE  ESSGHIATEE  NLQRLVEIGT  RLLEKQESRI
351  NLDTGRLESI  PGASTNEAAI  TKFAKLLSEE  RKLRQLK
```

Spot No.: **D78 (S46)**

NCBI accession No.: [gi|4469175](#) Species: *Hevea brasiliensis*

Protein name: [beta-1,3-glucanase](#)

**PMF** score: **126**

Sequence coverage %: **55**

Matched peptides No.: **19**

Total peptides No.: **37**

Calculated Mr: **38930**

Calculated pI: **9.45**

Probability Based Mowse Score:

Protein score is  $-10 \cdot \log(P)$ , where P is the probability that the observed match is a random event. Protein scores greater than 73 are significant ( $p < 0.05$ ).



Matched peptide sequences: shown in **Bold Red**

```
1  MAISSSTSGT  SSSLPSRTTV  MLLFFFAAS  VGITDAQVGV  CYGMQGNNLP
51  PVSEVIALYK  KSNITRMRIY  DPNRAVLEAL  RGSNIELILG  VPNSDLQSLT
101 NPSNAKSWVQ  KNVRGFWSSV  LFRYIAVGNE  ISPVNRGTAW  LAQFVLPAMR
151 NIHDAIRSAG  LQDQIKVSTA  IDLTLVGNSY  PPSAGAFRDD  VRSYLNPIIR
201 FLSSIRSPLL  ANIYPYFTYA  GNPRDISLPY  ALFTSPSVVV  WDGQRGYKNL
251 FDATELDVLYS  ALERASGGSL  EVVSESGWP  SAGAFATFD  NGRTYLSNLI
301 QHVKRGTPKR  PNRAIETYLE  AMFDENKKQP  EVEKQFGLFF  PDKWQKYNLN
351  FG
```

Spot No.: **D79 (S54)**

NCBI accession No.: **gi|34538473** Species: *Hordeum vulgare*

Protein name: **caleosin 1**

**PMF** score: **84**

Sequence coverage %: **19**

Matched peptides No.: **10**

Total peptides No.: **37**

Calculated Mr: **34330**

Calculated pI: **6.11**

Probability Based Mowse Score:

Protein score is  $-10 \cdot \log(P)$ , where P is the probability that the observed match is a random event. Protein scores greater than 73 are significant ( $p < 0.05$ ).



Matched peptide sequences: shown in **Bold Red**

```
1  MATKARKVEV RDASRAEGKG DAADVHVLRE AMRADGKGDH DTAGGANRAD
51  GHGDAGGRVG DSRGVDGKDS LKMVALQAPV TVERPVRGDL EEHVPKPYLA
101 RALAAPDMYH PEGTTTDDHQ HHNMSVLQQH VAFFDRDNGG IIYPWETYDG
151 CRAVGFNVMF SAFIAFLVNL VMSYPTLPGW LPNPLFPIYV HNIHKSKHGS
201 DSGTYDKEGR FMPVNFENIF SKYARTYPDR LSYREEMWRMT EGCREVDFDF
251 GWVAMKLEWS ILYALARDEE GYLSREAIRR MYDGSLFEYM ERQRMEHVKM
301 S
```

Spot No.: **D80 (S61)**

NCBI accession No.: **gi|255560725** Species: *Ricinus communis*

Protein name: **dead box ATP-dependent RNA helicase, putative**

Mascot score: **144**

Sequence coverage %: **68**

Matched peptides No.: **25**

Total peptides No.: **91**

Calculated Mr: **47097**

Calculated pI: **5.49**

Probability Based Mowse Score:

Protein score is  $-10 \cdot \log(P)$ , where P is the probability that the observed match is a random event. Protein scores greater than 73 are significant ( $p < 0.05$ ).

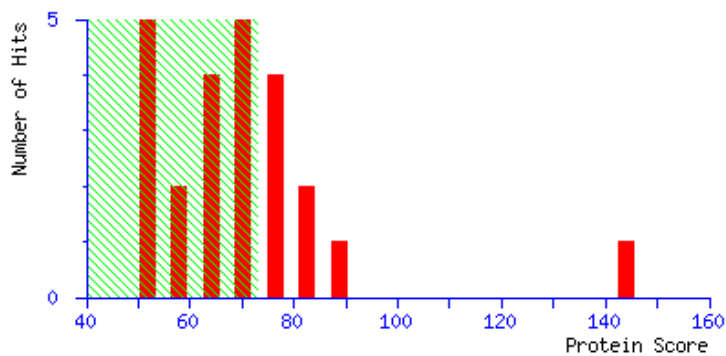

Matched peptide sequences: shown in **Bold Red**:

```
1  MAGLAPEGSQ FDAKQYDARM SELLSTEGQE FFTTYDEVYD SFDAMGLQEN
51 LLRGIYAYGF EKPSAIQQRG IVPFCKGLDV IQQAQSGTGK TATFCSGILQ
101 QLDYGLVQCQ ALVLAPTREL AQQIEKVMRA LGDYLGVKVH ACVGGTSVRE
151 DQRILQAGVH VVVGTPGRVF DMLRRQSLRP DYIKMFVLDE ADEMLSRGFK
201 DQIYDIFQLL PAKVQGVVFS ATMPPEALEI TRKFMNKPVR ILVCRDELTL
251 EGIKQFYVNV EKEEWKLETL CDLYETLAIT QSVIFVNTRR KVDWLTDKMR
301 SRDHTVSATH GDMDQNTRDI IMREFRSGSS RVLITTDLLA RGIDVQQVSL
351 VINYDLPTQP ENYLHRIGRG GRFGRKGVAI NFVTRDDERM LFDIQKFYNV
401 VIEELPSNVA DLL
```

Spot No.: **D81 (S63)**

NCBI accession No.: **gi|255578278** Species: *Ricinus communis*

**PFF** score: **[76]**

Protein name: **hypothetical protein RCOM\_0537780**

Matched peptides No.: **[3]** Sequence coverage %: **[6]**

Matched sequences: **K.QESEYGSGGYGR.R;**  
**R.KPSYGEEGGYGER.T ;**  
**R.KPSYGEEGGYGER.T**

Calculated Mr: **41389**

Calculated pI: **4.65**

Probability Based Mowse Score:

#### Mascot Score Histogram

Ions score is  $-10 \cdot \log(P)$ , where P is the probability that the observed match is a random event. Individual ions scores  $> 44$  indicate identity or extensive homology ( $p < 0.05$ ). Protein scores are derived from ions scores as a non-probabilistic basis for ranking protein hits.



Matched peptide sequences: shown in **Bold Red**:

```
1  MPYYTRSEDD  VDNDFDFDPT  PYGGGYDLAL  TYGRPLPPSD  ETCYQNSAIA
51  DDDVDYDRPN  FTSYAEPSAY  NDDILQEEYN  SYSRPKPRPG  FIPGGGIGGD
101  PYSRPHAAPG  FQPGSGGYGG  VSEYEKPSGY  GRRPDSEYGS  GGYGGGTEYE
151  RPSGEDYGS  HGRKQDSEYG  SGGYGRRPES  EYGSGGGYER  PSSEEYGSY
201  GRKQESEYGS  GGYGRRPEAE  YGSGYGRPE  TEYGGGGGSE  YGGGYGRKPS
251  YGEEGGYGER  TEYERPSYGD  DPPRRPGYGR  QDDEYERPSY  ERKSDDDNDG
301  SRRKYGGDDD  EKGYQKKYGG  YGDDDDEEGS  RRYGYGGEE  ESYGRKKYGD
351  DGSDDDEKKH  HRHKHHQHKH  SDDE
```

Spot No.: **D82 (S69)**

NCBI accession No.: **gi|2501850** Species: *Nicotiana tabacum*

Protein name: **GDP dissociation inhibitor**

**PMF** score: **83**

Sequence coverage %: **34**

Matched peptides No.: **16**

Total peptides No.: **62**

Calculated Mr: **50127**

Calculated pI: **5.44**

Probability Based Mowse Score:

Protein score is  $-10 \cdot \log(P)$ , where P is the probability that the observed match is a random event. Protein scores greater than 73 are significant ( $p < 0.05$ ).

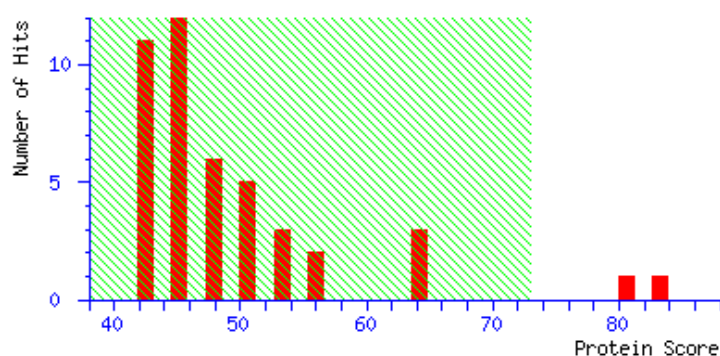

Matched peptide sequences: shown in **Bold Red**:

```
1  MDEEYDVIVL  GTGLKECILS  GLLSVDGLKV  LHMDRNDYYG  GESTSLNLVQ
51 LWKRFRGSDK  PPAELGSSRD  FNVDMIPKFI  MANGALVRVL  IHTDVTKYLY
101 FKAVDGSFVY  NKGKVHKVPA  TDMEALKSPL  MGIFEKRRAR  KFFIYVQDYN
151 ESDPKTHEGM  DLTRVTREL  IAKYGLDDNT  VDFIGHALAL  HRDDRYLDEP
201 AQDTVKRMKL  YAESLARFQG  GSPYIYPLYG  LGELPQAFAR  LSAVYGGTYM
251 LNKPECKVEF  DEEGKVCGVT  SEGETAKCKK  VVCDPSYLPN  KVRKVGKVAR
301 AIAIMSHPIP  NTNDSHSVQI  ILPQQLGRK  SDMYLFCCSY  THNVAPKGKF
351 IAFVSTEAE  DNPESLQKQ  VNLLGPVDEI  FYETYDRSEP  VNEPSLDNCF
401 ISTSYDATTH  FESTVDDVLN  LYTKITGKVL  DLNVDLSAAS  AAEE
```

Spot No.: **D83 (S75)**

NCBI accession No.: **gi|3264769** Species: *Prunus armeniaca*

**PFF** score: **[74]** Protein name: **late embryogenesis-like protein**

Matched peptides No.: **[1]** Sequence coverage %: **[8]**

Matched sequences: **K.LVSGGLIPDAGTIHAHGEETVK.V**

Calculated Mr: **28937**

Calculated pI: **4.72**

Probability Based Mowse Score:

Ions score is  $-10 \cdot \log(P)$ , where P is the probability that the observed match is a random event.

Individual ions scores  $> 45$  indicate identity or extensive homology ( $p < 0.05$ ).

Protein scores are derived from ions scores as a non-probabilistic basis for ranking protein hits.



Matched peptide sequences: shown in **Bold Red**:

```
1  DVTAIHIPSI  NLEKAEIVVD  VLIKPNPVP  IPLIDINYLI  ESDGRKLVSG
51  LIPDAGTIHA  HGEETVKVPV  HLVDYDDIKNT  YDDIKPGSII  PYRFKVDLIV
101 DVPVVLGRLTL  PLEKTGEIPI  PYKPDVDVEK  IKFQAQSFEE  TVAVLHVKLE
151 NMNDFDLGLN  ALDYEIWLSE  VNIGGAQLSQ  SANLAKKGVT  FIELPITFRP
201 KDFGSALWDM  IRGKGTGYTI  KGNINVDTPF  GAMKLPIVKE  GGTTLRKKNK
251 EDGGDDDDDED  ED
```



Spot No.: **D84 (S85)**

NCBI accession No.: **gi|224099853** Species: *Populus trichocarpa*

**PFF** score: **[69]** Protein name: **putative protein**

Matched peptides No.: **[2]** Sequence coverage %: **[5]**

Matched sequences: **S FEHPLNELKP VPR**

Calculated Mr: **27448**

Calculated pI: **5.84**

Probability Based Mowse Score:

Ions score is  $-10 \cdot \log(P)$ , where P is the probability that the observed match is a random event.

Individual ions scores  $> 45$  indicate identity or extensive homology ( $p < 0.05$ ).

Protein scores are derived from ions scores as a non-probabilistic basis for ranking protein hits.



Matched peptide sequences: shown in **Bold Red**

```
1 MLAVFDNTVA KCPDALQSPH SAPASSALKD GFLANHFASQ HPGSVTVNLG
51 TSGLISHSVE KQNPFLPRLF AVVDDIFCLF QGHIDNVAVL KQQYGLNKTA
101 NEVIVVIEAY RTLRDRGPYP ADQVVKDIQG KFAFILDST SKATFFAADA
151 DGSVPFFWGA DSEGNLVLSD DVQIVQKCG KSFAPFKGC FFTTSGGLRS
201 FEHPLNELKP VPRVDSSGQV CGATFKVDAE TKKESVGMPR VDSSYNWSSN
251 Y
```



Spot No.: **D85 (S86)**

NCBI accession No.: **gi|38122474** Species: *Hevea brasiliensis*

**PFF** score: **[410]** Protein name: rubber elongation factor

Matched peptides No.: **[4]** Sequence coverage %: **[26]**

Matched sequences: **YLDFVQAATVYAR** ;

**SGPFKPGVNTVESR**;

**SVVRPVYNK** ;

**RVDAYVTVLDR**

Calculated Mr: **19570**

Calculated pI: **5.06**

Probability Based Mowse Score:

Ions score is  $-10 \cdot \log(P)$ , where P is the probability that the observed match is a random event.

Individual ions scores  $> 45$  indicate identity or extensive homology ( $p < 0.05$ ).

Protein scores are derived from ions scores as a non-probabilistic basis for ranking protein hits.



Matched peptide sequences: shown in **Bold Red**

```
1 MAEGEEVNI QEEANKGEEN PQEEANIQEE TNKGEENIQE EANIEEEANK
51 EEESLKYLDF VQAATVYARA SFSKLYLFAK DKSGPFKPGV NTVESRFSV
101 VRPVYKFKQP VPNKVLKPAD RRVDAYVTVL DRIVPPIVKR ASIQAYSVAP
151 GAALAVASYL PLHTKRLSKV LYGDG
```

Spot No.: **D86 (S87)**

NCBI accession No.: **gi|38122474** Species: *Hevea brasiliensis*

**PFF** score: **[226]** Protein name: rubber elongation factor

Matched peptides No.: **[4]** Sequence coverage %: **[26]**

Matched sequences: **YLDFVQAATVYAR** ;

**SGPFKPGVNTVESR**;

**SVVRPVYNK** ;

**RVDAYVTVLDR**

Calculated Mr: **19570**

Calculated pI: **5.06**

Probability Based Mowse Score:

Ions score is  $-10 \cdot \log(P)$ , where P is the probability that the observed match is a random event.

Individual ions scores  $> 46$  indicate identity or extensive homology ( $p < 0.05$ ).

Protein scores are derived from ions scores as a non-probabilistic basis for ranking protein hits.

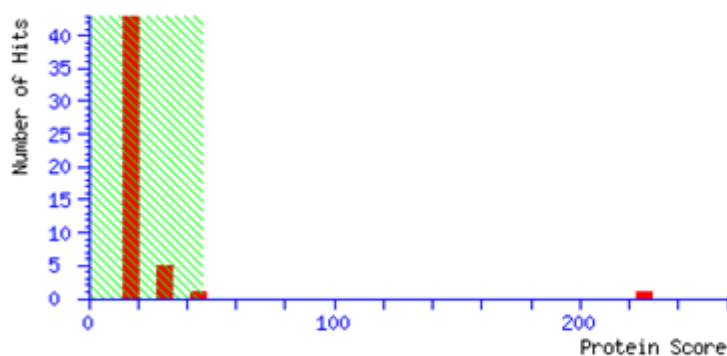

Matched peptide sequences: shown in **Bold Red**

```
1 MAEGEEEVNI QEEANKGEEN PQEENIQEE TNKGEENIQE EANIEEEANK
51 EEESLKYLDF VQAATVYARA SFSKLYLFAK DKSGPFKPGV NTVESRFKSV
101 VRPVYNKFQP VPNKVLKFAD RRVDAYVTVL DRIVPPIVKR ASIQAYSVAP
151 GAALAVASYL PLHTKRLSKV LYGDG
```

Spot No.: **D87 (S90)**

NCBI accession No.: [gi|334854634](#) Species: *Hevea brasiliensis*

**PFF** score: [490] Protein name: **elicitor-responsive protein**

Matched peptides No.: [3] Sequence coverage %: [59]

Matched sequences: **PLGTVEVLLVGAKGLENDFLNGVDPYVVLACR**;

**GSEP EWNEKFSFEVSDGDTELTLK**;

**GEITVGLTFTPEVEMDNVVDGYDFRL**

Calculated Mr: **15249**

Calculated pI: **4.06**

Probability Based Mowse Score:

Ions score is  $-10 \cdot \log(P)$ , where P is the probability that the observed match is a random event.

Individual ions scores > 45 indicate identity or extensive homology ( $p < 0.05$ ).

Protein scores are derived from ions scores as a non-probabilistic basis for ranking protein hits.

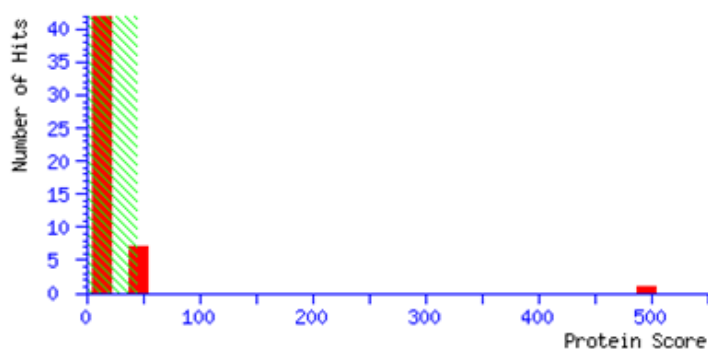

Matched peptide sequences: shown in **Bold Red**

1 **MPLGTVEVLL VGAKGLENTD FLNGVDPYVV LACRTQEQKS SVASGKGSEP**  
51 **EWNEKFSFEV SDGDTELTLK IMDSVGAAD DFGVGEATIPL EPLFLEGNLP**  
101 **STAYKVVKEQ EYKGEITVGL TFTPEVEMDN VVDGYDFRL**

Spot No.: **D88 (S92)**

NCBI accession No.: [gi|224144943](#) Species: *Populus trichocarpa*

**PFF** score: **[180]** Protein name: **predicted protein**

Matched peptides No.: **[2]** Sequence coverage %: **[28]**

Matched sequences: [VFEDNVLIRVLVVDGGGSLR](#);

[HVPITIG GTRISDGEWLYADTDGILISR](#)

Calculated Mr: **17971**

Calculated *pI*: **5.39**

Probability Based Mowse Score:

Ions score is  $-10 \cdot \log(P)$ , where P is the probability that the observed match is a random event.

Individual ions scores > 44 indicate identity or extensive homology ( $p < 0.05$ ).

Protein scores are derived from ions scores as a non-probabilistic basis for ranking protein hits.



Matched peptide sequences: shown in **Bold Red**

```
1 MALVTIAEVC DANPQLIVSG ELRALQPIFQ IYGRRQVFSG PVVILKVFED
51 NVLIREFLEE KGNGRVLVD GGGSLRCAIL GGNPVVQAQN NGWAGIVVNG
101 CIRDVDEIMG CDIGVRALAS HPMKANKKGI GEKHVPITIG GTRISDGEWL
151 YADTDGILIS RTELAV
```

Spot No.: **D89 (S94)**

NCBI accession No.: [gi|123062](#)

Species: *Hevea brasiliensis*

PFF score: **[96]**

Protein name: [prohevein](#)

Matched peptides No.: **[1]** Sequence coverage %: **[8]**

Matched sequences: [IVDQ CSNGGLLDV NVFR](#)

Calculated Mr: **22700**

Calculated pI: **5.63**

Probability Based Mowse Score:

Ions score is  $-10 \cdot \log(P)$ , where P is the probability that the observed match is a random event.

Individual ions scores > 44 indicate identity or extensive homology ( $p < 0.05$ ).

Protein scores are derived from ions scores as a non-probabilistic basis for ranking protein hits.

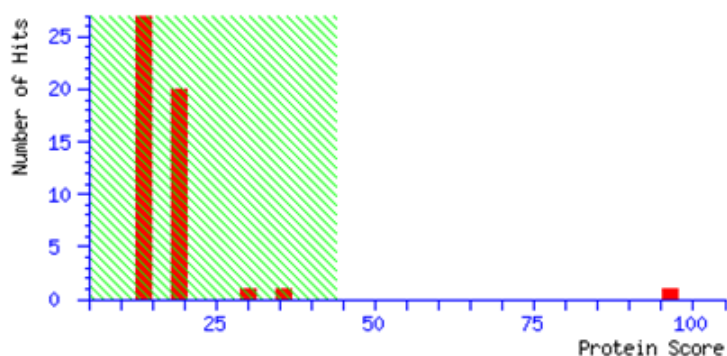

Matched peptide sequences: shown in **Bold Red**

```
1  MNIFIVLLC  LTGVAIAEQC  GRQAGGKLCF >NNLCCSQWGW  CGSTDEYCSP
51  DHNCQSNCKD  SGEQVGGGSA  SNVLATYHLY  NSQDHGWDLN  AASAYCSTWD
101 ANKPYSWRSK  YGWIAFCGPV  GAHQSSCGK  CLSVTNTGTG  AKTTVRIVDQ
151 CSNGGLLDV  NVFRQLDTDG  KGYERGHITV  NYQFVDCGDS  FNPLFSVMKS
201  SVIN
```

Spot No.: **D90 (S98)**

NCBI accession No.: [gi|38122474](#) Species: *Hevea brasiliensis*

Protein name: [rubber elongation factor](#)

**PMF** score: **99**

Sequence coverage %: **45**

Matched peptides No.: **8**

Total peptides No.: **39**

Calculated Mr: **19570**

Calculated pI: **5.06**

Probability Based Mowse Score:

Protein score is  $-10 \cdot \log(P)$ , where P is the probability that the observed match is a random event. Protein scores greater than 73 are significant ( $p < 0.05$ ).



Matched peptide sequences: shown in **Bold red**:

```
1 MAEGEEEVNI QEEANKGEEN PQEENIQEE TNKGEENIQE EANIEEEANK
51 EEESLKYLDF VQAATVYARA SFSKLYLFAK DKSGPFKPGV NTVESRFKSV
101 VRPVYNKFQP VPNKVLKFAD RRVDAYVTVL DRIVPPIVKR ASIQAYSVAP
151 GAALAVASYL PLHTKRLSKV LYGDG
```

Spot No.: **D91 (S100)**

NCBI accession No.: **gi|1709761** Species: *Spinacia oleracea*

**PFF** score: **[49]**

Protein name: **Proteasome subunit alpha type-4**

Matched peptides No.: **[1]** Sequence coverage %: **[3]**

Matched sequences: **R.TTIFSPEGR.L**

Calculated Mr: **27545**

Calculated pI: **6.17**

### Probability Based Mowse Score:

Ions score is  $-10 \cdot \log(P)$ , where P is the probability that the observed match is a random event. Individual ions scores  $> 44$  indicate identity or extensive homology ( $p < 0.05$ ). Protein scores are derived from ions scores as a non-probabilistic basis for ranking protein hits.



Matched peptide sequences: shown in **Bold Red**:

```
1 MSRRYDSRTT IFSPEGRLYQ VEYAMEAIGN AGSAIGILAK DGVVLIGEKK
51 VTSKLLQTST STEKMYKIDD HVACAVAGIM SDANILINTA RVQAQRYTFS
101 YQEPMPVEQL VQSLCDTKQG YTQFGGLRPF GVSFLFAGWD KNYGFQLYMS
151 DSPGNYGGWK ATAIGANNQA AQSMLKQDYK DDVTREDAVK LALKALSKTM
201 DSTSLTSEKL ELAEVYLLPS GKVYQVHSP ESLNRLTES GLTQPAETS
```

Spot No.: **D92 (S103)**

NCBI accession No.: [gi|38122474](#) Species: *Hevea Brasiliensis*

Protein name: rubber elongation factor

PMF score: **125**

Sequence coverage %: **68**

Matched peptides No.: **11**

Total peptides No.: **50**

Calculated Mr: **19570**

Calculated pI: **5.06**

Probability Based Mowse Score:

Protein score is  $-10 \cdot \log(P)$ , where P is the probability that the observed match is a random event. Protein scores greater than 73 are significant ( $p < 0.05$ ).



Matched peptide sequences: shown in **Bold Red**

1 **MAEGEEEVNI QEEANKGEEN PQEEANIQEE TNKGEENIQE EANIEEEANK**  
51 **EEESLKYLDF VQAATVYARA SFSKLYLFAK DKSGPFKPGV NTVESRFKSV**  
101 **VRPVYNKFQP VPNKVLKPAD RRVDAYVTVL DRIVPPIVKR ASIQAYSVAP**  
151 GAALAVASYL PLHTKRLSKV LYGDG



Spot No.: **D93 (S105)**

NCBI accession No.: [gij157831407](#) Species: *Hevea brasiliensis*

Protein name: [Chain A, Crystal Structures Of Hevamine](#)

**PMF** score: **93**

Sequence coverage %:**51**

Matched peptides No.: **13**

Total peptides No.: **76**

Calculated Mr: **29874**

Calculated pI: **8.44**

Probability Based Mowse Score:

Protein score is  $-10 \cdot \log(P)$ , where P is the probability that the observed match is a random event. Protein scores greater than 73 are significant ( $p < 0.05$ ).

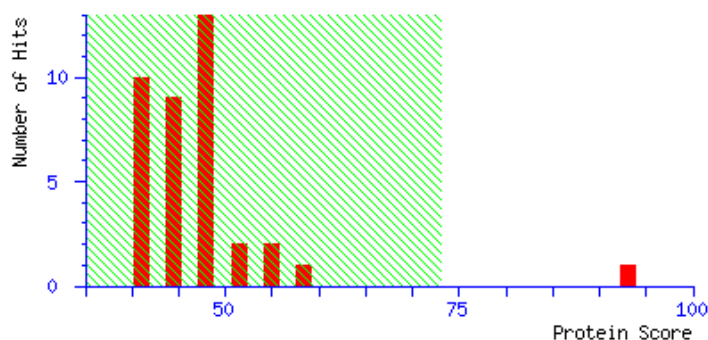

Matched peptide sequences: shown in **Bold red**:

```
1  GGIAIYWGQN  GNEGTLTQTC  STRKYSYVNI  AFLNKFGNGQ  TPQINLAGHC
51  NPAAGGCTIV  SNGIRSCQIQ  GIKVMSLGG  GIGSYTLASQ  ADARNVADYL
101 WNNFLGGKSS  SRPLGDAVLD  GIDFDIEHGS  TLYWDDLARY  LSAYSKQGKK
151 VYLTAAPQCP  FPDRYLGTAL  NTGLFDYVWV  QFYNNPPCQY  SSGNINNIIN
201  SWNRWTT SIN  AGKIFLGLPA  APEAAGSGYV  PPDVLSRIL  PEIKKSPKYG
251 GVMLWSKFYD  DKNGYSSSIL  DSV
```

Spot No.: **D94 (S108)**

NCBI accession No.: **gi|2493895** Species: *Citrullus lanatus*

**PFF** score: **[89]**

Protein name: **cysteine synthase**

Matched peptides No.: **[1]** Sequence coverage %: **[ ]**

Matched sequences: **K.EGLLVGISSGAAAAAIR.I**

Calculated Mr: **34495** Calculated pI: **6.26**

Probability Based Mowse Score:

Ions score is  $-10 \cdot \log(P)$ , where P is the probability that the observed match is a random event. Individual ions scores > 41 indicate identity or extensive homology ( $p < 0.05$ ). Protein scores are derived from ions scores as a non-probabilistic basis for ranking protein hits.

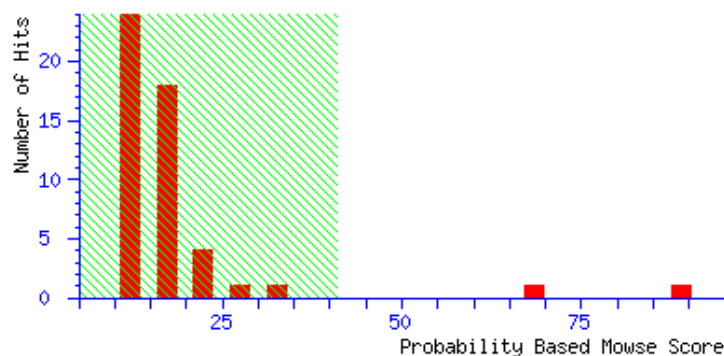

Matched peptide sequences: shown in **Bold Red**:

```
1 MADAKSTIAK DVTELIGHTP LVYLNRVVDG CVARVAAKLE MMEPCSSVKD RIGYSMISDA
61 ENKGLITPGE SVLIEPTSGN TGIGLAFIAA AKGYRLIICM PASMSLEERT ILRAFGAELV
121 LTDPARGMKG AVQKAEEIKA KTPNSYILQQ FENPANPKIH YETTGPPIWR GSGGKIDALV
181 SGIGTGGTVT GAGKYLKEQN PNIKLYGVEP VESAILSGGK PGPHKIQQIG AGFIPGVLDV
241 NLLDEVIQVS SEESIETAKL LALKEGLLVG ISSGAAAAAA IRIAKRPENA GKLIVAVFPS
301 FGERYLSTVL FESVKRETEK MVFEP
```

Spot No.: **D95 (S117)**

NCBI accession No.: **gi|51315784** Species: *Hevea brasiliensis*

**PFF** score: **[59]**

Protein name: **Esterase**

Matched peptides No.: **[1]**

Sequence coverage %: **[4]**

Matched sequences: **K.AAAFYPLNPPYGETFFHR.S**

Calculated Mr: **43871**

Calculated pI: **5.00**

Probability Based Mowse Score:

Ions score is  $-10 \cdot \log(P)$ , where P is the probability that the observed match is a random event. Individual ions scores  $> 43$  indicate identity or extensive homology ( $p < 0.05$ ). Protein scores are derived from ions scores as a non-probabilistic basis for ranking protein hits.



Matched peptide sequences: shown in **Bold Red**:

```
1  MEFPETNNNP  IITLSFLLCM  LSLAYASETC  DFPALFNFGD  SNSDTGGKAA
51  AFYPLNPPYG ETFFHRSTGR  YSDGRLIIDF  IAESFNLPYL  SPYLSLGSN
101 FKHGADFATA  GSTIKLPITI  IPAHGGFSPF  YLDVQYSQFR  QFIPRSQFIR
151 ETGGIFAELV  PEEYYFEKAL  YTFDIGQNDL  TEGFLNLTVE  EVNATVPDLV
201 NSFSANVKKI  YDLGARTFWI  HNTGPIGCLS  FILTYFPWAE  KDSAGCAKAY
251 NEVAQHFNHK  LKEIVAQLRK  DLPLATFVHV  DIYSVKYSLF  SEPEKHGFEE
301 PLITCCGYGG  KYNFSVTAPC  GDTVTADDGT  KIVVGSCACP  SVRVNWDGAH
351 YTEAANEYFF  DQISTGAFSD  PPVPLNMACH  KTESLRTLAS  V
```

Spot No.: **D96 (S118)**

NCBI accession No.: [gi|38122474](#) Species: *Hevea brasiliensis*

Protein name: [rubber elongation factor](#)

**PMF** score: **98**

Sequence coverage %: **57**

Matched peptides No.: **9**

Total peptides No.: **44**

Calculated Mr: **19570**

Calculated pl: **5.06**

Probability Based Mowse Score:

Protein score is  $-10 \cdot \log(P)$ , where P is the probability that the observed match is a random event. Protein scores greater than 73 are significant ( $p < 0.05$ ).



Matched peptide sequences: shown in **Bold Red**

```
1  MAEGEEEVNI  QEEANKGEEN  PQEENIQEE  TNKGEENIQE  EANIEEEANK
51  EEESLKYLDF  VQAATVYARA  SFSKLYLFAK  DKSGPFKPGV  NTVESRFKSV
101 VRPVYNKFQP  VPNKVLKFAD  RRVDAYVTVL  DRIVPPIVKR  ASIQAYSVAP
151 GAALAVASYL  PLHTKRLSKV  LYGDG
```

Spot No.: **D97 (S121)**

NCBI accession No.: **gi| 255554865** Species: *Ricinus communis*

PFF score: **[55]**

Protein name: **lactoylglutathione lyase, putative**

Matched peptides No.: **[1]**

Sequence coverage %: **[3]**

Matched sequences: **K.FYTECFGMK.L**

Calculated Mr: **31641**

Calculated pI: **7.63**

Probability Based Mowse Score:

Ions score is  $-10 \cdot \log(P)$ , where P is the probability that the observed match is a random event.

Individual ions scores > 40 indicate peptides with significant homology.

Individual ions scores > 44 indicate identity or extensive homology ( $p < 0.05$ ).

Protein scores are derived from ions scores as a non-probabilistic basis for ranking protein hits.



Matched peptide sequences: shown in **Bold Red**:

```
1  MAAEATAPNA  DVLEWPKKDK  RRLHAVYRV  GDLDRTIKFY  TECFGMKLLR
51  KRDIPEEKYS  NAFLGFGPEE  TNFVVELTYN  YGVTSYDIGT  GFGHFATQ
101 DVYKLVVEVL  AKGGAVTREP  GPVKGGTTVI  AFVKDPDGYI  FELIQRGPTP
151 EPLCQVMLRV  GDLDRSIRFY  EKALGMKLLR  KVDKPEYKYT  LAMMGYADEY
201 ETTVLELTYN  YGVTEYTKGN  AYAQVAISTD  DVYKSAEVVN  LVTQELGGKI
251 TRQPGPIPGL  NTKITSFLDP  DGWKTKRKRR
```

Spot No.: **D98 (S123)**

NCBI accession No.: **gi|15225839** Species: *Arabidopsis thaliana*

Protein name: **endopeptidase/ peptidase/ threonine-type**

**endopeptidase**

**PMF** Mascot score: **86**

Sequence coverage %: **40**

Matched peptides No.: **14**

Total peptides No.: **56**

Calculated Mr: **27645**

Calculated pI: **5.93**

Probability Based Mowse Score:

Protein score is  $-10 \cdot \log(P)$ , where P is the probability that the observed match is a random event. Protein scores greater than 73 are significant ( $p < 0.05$ ).

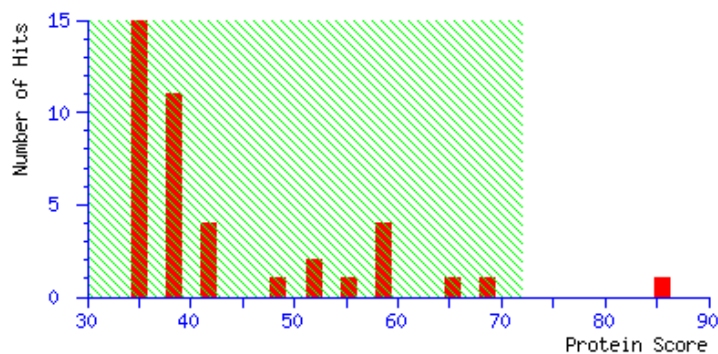

Matched peptide sequences: shown in **Bold Red**:

```
1  MSSIGTGYDL  SVTTFSPDGR  VFQIEYAAKA  VDNSGTVVGI  KCKDGIVMGV
51  EKLIASKMML  PGSNRRIHVS  HRHAGMAVAG  LAADGRQIVA  RAKSEARSYE
101 SVYGDVFPVK  ELSERVASYV  HLCTLYWWLR  PFGCGVILGG  YDRDGPQLYM
151 IEPSGISYRY  FGAAIGKQKQ  AAKTEIEKLN  LSEMTCKEGV  IEVAKI IYKL
201 HDEAKDKAFE  LEMSWICEES  KREHQKVPDD  LLEEAKTAAK  TALEEMDAD
```

Spot No.: **D99 (S126)**

NCBI accession No.: **gi|29170601** Species: *Hevea brasiliensis*

**PFF** score: **[97]**

Protein name: **small rubber particle protein**

Matched peptides No.: **[1]** Sequence coverage %: **[12]**

Matched sequences: **K.ENENFQQEANEQEEK.L**

Calculated Mr: **12769**

Calculated pI: **4.61**

Probability Based Mowse Score:

Ions score is  $-10 \cdot \log(P)$ , where P is the probability that the observed match is a random event. Individual ions scores  $> 44$  indicate identity or extensive homology ( $p < 0.05$ ). Protein scores are derived from ions scores as a non-probabilistic basis for ranking protein hits.



Matched peptide sequences: shown in **Bold Red**:

```
1 MAEGKENENF QQEANEQEEK LKYLEFVQAT TDNAV TALS N IYLYAKDNSG
51 PLKPGVETIE GVAKTVVIPA SKIPTEAIKF ADRAVDASFT TLQNIVPSVL
101 KQLPTQACDT SVKESAE
```

Spot No.: **D100 (S127)**

NCBI accession No.: **gi|2832430** Species: *Hevea brasiliensis*

**PFF** score: **[84]**

Protein name: **prohevein**

Matched peptides No.: **[1]**

Sequence coverage %: **[10]**

Matched sequences: **K.YGWTAFCGPVGAHGQPSCGK.C**

Calculated Mr: **20852**

Calculated pI: **5.64**

### Probability Based Mowse Score:

Ions score is  $-10 \cdot \log(P)$ , where P is the probability that the observed match is a random event. Individual ions scores  $> 43$  indicate identity or extensive homology ( $p < 0.05$ ). Protein scores are derived from ions scores as a non-probabilistic basis for ranking protein hits.

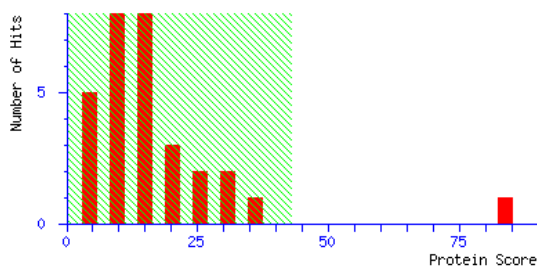

Matched peptide sequences: shown in **Bold Red**:

```
1  EQCGRQAGGK LCPNNLCCSQ  WGWCGSTDEY  CSPDHNCQSN  CKDSGEGVGG
51  GSASNVLATY  HLYNSQDHGW  DLNAASAYCS  TWDANKPYSW  RSKYYGWTAFC
101 GPVGAHGQPS CGKCLSVTNT  GTGAKATVRI  VDQCSNGGLD  LDVNVFRQLD
151  TDGKGYERGH  LTVNYQFVDC  GDSFNPLFSV  MKSSVIN
```



Spot No.: **D101 (S128)**

NCBI accession No.: **gi|224054224** Species: *Populus trichocarpa*

**PFF** score: **[68]**

Protein name: **predicted protein**

Matched peptides No.: **[2]**

Sequence coverage %: **[12]**

Matched sequences: **R.AYVGD**RPTWR.N;

**R.NPQHP**WR.V

Calculated Mr: **15003**

Calculated pI: **6.82**

Probability Based Mowse Score:

Ions score is  $-10 \cdot \log(P)$ , where P is the probability that the observed match is a random event.

Individual ions scores  $> 45$  indicate identity or extensive homology ( $p < 0.05$ ).

Protein scores are derived from ions scores as a non-probabilistic basis for ranking protein hits.



Matched peptide sequences: shown in **Bold Red**:

```
1  MTVKLVDAI  SSFGSVFEKF  KAEAPKNKVN  LILFLADNDP  STNLSWCPDC
51  VRAEPVILKK  LEALPDDVAL  LRAYVGDRPT  WRNPQHPWRV  DSRFKLKGVP
101 TLISWENDAV  KGRLEDYEAH  LEHKINALVS  GN
```

Spot No.: **D102 (S130)**

NCBI accession No.: **gi|268321205**

Plantspecies: ***Hevea brasiliensis*** Protein name: **latex cystatin**

**PMF** score: **81** Sequence coverage %: **48**

Matched peptides No.: **6** Total peptides No.:**42**

Calculated Mr: **11248** Calculated pI: **5.45**

Probability Based Mowse Score:

Protein score is  $-10 \cdot \log(P)$ , where P is the probability that the observed match is a random event. Protein scores greater than 73 are significant ( $p < 0.05$ ).



Matched peptide sequences: shown in **Bold Red**

```
1 MAKLGGVKEV EGSANSVEIN SLARYAVDDY NQKQNALLEF KKVVNAKQQV  
51 VAGTIYYITL EVIDGGQKKV YEAKVWEKPW LNFKEVQEPK LIGDAPSDST  
101 A
```

Spot No.: **D103 (S133)**

NCBI accession No.: **gi|242083244**

Plantspecies: ***Sorghum bicolor***

Protein name: **hypothetical protein SORBIDRAFT\_08g008236**

**PMF** score: **81**

Sequence coverage %: **89**

Matched peptides No.: **7**

Total peptides No.: **33**

Calculated Mr: **8620**

Calculated pI: **6.4**

Probability Based Mowse Score:

Protein score is  $-10 \cdot \log(P)$ , where P is the probability that the observed match is a random event. Protein scores greater than 73 are significant ( $p < 0.05$ ).

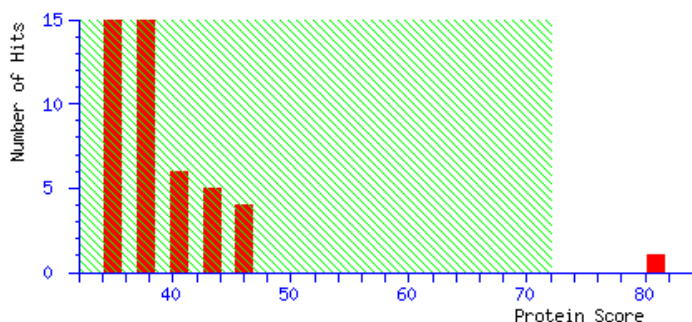

Matched peptide sequences: shown in **Bold Red**

**1** **CVENIILSVL FWSKVQLCLR ASQPLLVALR IVDGDETPID PKIMVAMDVA**  
**51** **KAIIKESLKD KPILLNEVLK YYDNR**

Spot No.: **D104 (S134)**

NCBI accession No.: **gi|29170601** Species: *Hevea brasiliensis*

PFF score: **[85]**

Protein name: **small rubber particle protein**

Matched peptides No.: **[1]** Sequence coverage %: **[15]**

Matched sequences: **R.AVDASFTTLQNIVPSVLK.Q**

Calculated Mr: **12769**

Calculated pI: **4.61**

Probability Based Mowse Score:

Ions score is  $-10 \cdot \log(P)$ , where P is the probability that the observed match is a random event.

Individual ions scores  $> 39$  indicate peptides with significant homology.

Individual ions scores  $> 44$  indicate identity or extensive homology ( $p < 0.05$ ).

Protein scores are derived from ions scores as a non-probabilistic basis for ranking protein hits.



Matched peptide sequences: shown in **Bold Red**:

```
1 MAEGKENENF QQEANEQEEK LKYLEFVQAT TDNAVTALSN IYLYAKDNSG
51 PLKPGVETIE GVAKTIVVIPA SKIPTEAIKF ADRAVDASFT TLQNIVPSVL
101 KQLPTQACDT SVKESAE
```

Spot No.: **D105 (S136)**

NCBI accession No.: **gi|354318** Species: *Triticum aestivum*

**PFF** score: **[128]** Protein name: **calmodulin**

Matched peptides No.: **[1]** Sequence coverage %: **[10]**

Matched sequences: **R.VFDKDQDGFISAAELR.H**

Calculated Mr: **16876**

Calculated *pI*: **4.10**

Probability Based Mowse Score:

Ions score is  $-10 \cdot \log(P)$ , where P is the probability that the observed match is a random event.

Individual ions scores > 45 indicate identity or extensive homology ( $p < 0.05$ ).

Protein scores are derived from ions scores as a non-probabilistic basis for ranking protein hits.



Matched peptide sequences: shown in **Bold Red**:

```
1 ADQLTDEQNI AEFKEAFSLF DKDGDGCITT KELGIVMRSL GQNPTEAELQ
51 DMINEVDADG NGTIDFPEFL NLMARKMKDT DSEELKEAF RVFDKDQDGF
101 ISAAELRHVM TNLGEKLTDE EVDEMIREAD VDG DGQINYE EFVKVMMAK
```

Spot No.: **D106 (S137)**

NCBI accession No.: [gi|14423933](#) Species: *Hevea brasiliensis*

Protein name: [Small rubber particle protein](#)

**PMF** score: **84** Sequence coverage %: **65**

Matched peptides No.: **9** Total peptides No.:**43**

Calculated Mr: **22331** Calculated pI: **4.80**

Probability Based Mowse Score:

Protein score is  $-10 \cdot \log(P)$ , where P is the probability that the observed match is a random event.  
Protein scores greater than 73 are significant ( $p < 0.05$ ).

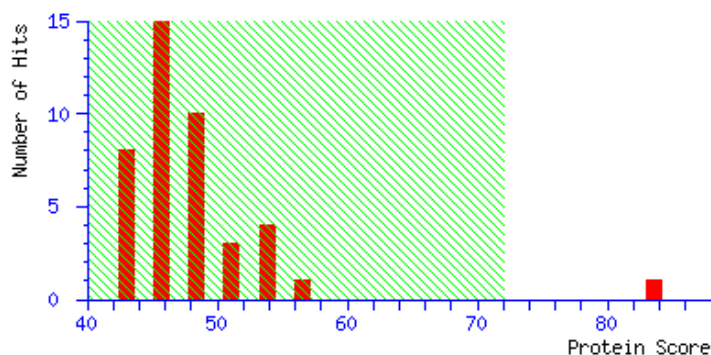

Matched peptide sequences: shown in **Bold Red**

```
1 MAEEVEEERL KYLDFVRAAG VYAVDSFSTL YLYARDISGP LKPGVDTIEN
51 VVKTVVTPVY YIPLEAVKfV DKTVDVSVTS LDGVVPPVIK QVSAQTYSVA
101 QDAPRIVLDV ASSVFNTGVQ EGAKALYANL EPKAEQYAVI TWRALNKLPL
151 VPQVANVVVP TAVYFSEKYN DVVRGTTEQG YRVSSYLPLL PTEKITKVFG
201 DEAS
```

Spot No.: **D107 (S138)**

NCBI accession No.: [gi|14423933](#) Species: *Hevea brasiliensis*

Protein name: [Small rubber particle protein](#)

**PMF** score: **162** Sequence coverage %: **85**

Matched peptides No.: **13** Total peptides No.:**43**

Calculated Mr: **22331** Calculated pI: **4.80**

Probability Based Mowse Score:

Protein score is  $-10 \cdot \log(P)$ , where P is the probability that the observed match is a random event. Protein scores greater than 73 are significant ( $p < 0.05$ ).



Matched peptide sequences: shown in **Bold Red**

```
1 MAEEVEEERL KYLDFVRAAG VYAVDSFSTL YLYAKDISGP LKPGVDTIEN
51 VVKTVVTPVY YIPLEAVKfV DKTVDVSVTS LDGVVPPVIK QVSAQTYsVA
101 QDAPRIVLDV ASSVENTGVQ EGAKALYANL EPKAEQYAVI TWRALNKLPL
151 VPQVANVVVP TAVYFSEKYN DVVRGTTEQG YRVSSYLPLL PTEKITKVFg
201 DEAS
```

Spot No.: **D108 (S139)**

NCBI accession No.: [gi|14423688](#) Species: *Hevea brasiliensis*

Protein name: **Enolase 1**

PMF score: **107**

Sequence coverage %: **44**

Matched peptides No.: **14**

Total peptides No.: **47**

Calculated Mr: **48029**

Calculated pI: **5.57**

Probability Based Mowse Score:

Protein score is  $-10 \cdot \log(P)$ , where P is the probability that the observed match is a random event. Protein scores greater than 73 are significant ( $p < 0.05$ ).



Matched peptide sequences: shown in **Bold red**:

```
1  MAITIVSVRA  RQIFDSRGNP  TVEADVCLSD  GYLARAAVPS  GASTGIYEAL
51  ELRDGGSDDL  GKGVS KAVEN  VNIIIGPALV  GKDPTDQVGI  DNFMVQQLDG
101 TVNEWGWCKQ  KLGANAILAV  SLAVCKAGAH  VKGIPLYEHI  ANLAGNKNLV
151 LPVPAFNVIN  GGSHAGNKLA  MQEFMILPVG  ASSFKEAMKM  GAEVYHHLKS
201 VIKKKYQQDA  TNVGDEGGFA  PNIQENKEGL  ELLKTAIAKA  GYTGKVVIGM
251 DVAASEFYGS  DQTYDLNFKE  ENNNGSQKIS  GEALKDLYKS  FVAEYPIVSI
301 EDPFDQDDWA  HYAKLTSEIG  EKVQIVGDDL  LVTNPKRVEK  AIKEKACNAL
351 LLKVNQIGSV  TESIEAVKMS  KRAGWGMAS  HRSGETEDTF  IADLSVGLAT
401 GQIKTGAPCR  SERLAKYNQL  LRIEEELGSE  AVYAGANFRK  FVEPY
```



Spot No.: **D109 (S143)**

NCBI accession No.: **gi|333690873** Species: *Hevea brasiliensis*

**PFF** score: **[52]**

Protein name: **glutathione-S-transferase tau 1**

Matched peptides No.: **[2]** Sequence coverage %: **[10]**

Matched sequences: **K.YEYREEDLR.N;**

**K.DKSPFLPSDPYQR.A**

Calculated Mr: **25595**

Calculated *pI*: **5.48**

Probability Based Mowse Score:

Ions score is  $-10 \cdot \log(P)$ , where P is the probability that the observed match is a random event. Individual ions scores  $> 45$  indicate identity or extensive homology ( $p < 0.05$ ). Protein scores are derived from ions scores as a non-probabilistic basis for ranking protein hits.

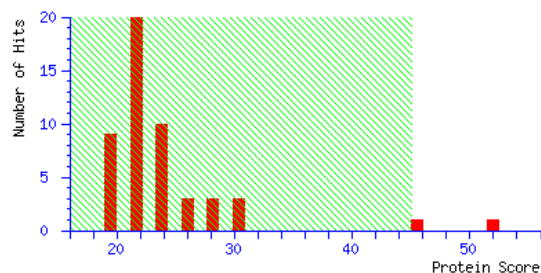

Matched peptide sequences: shown in **Bold Red**:

```
1 MAEEVILLDF WSPFGRMRV IALAEKGVKY EYREEDLRNK SPLLLQMNPFV
51 HKKIPVLIHN GKPICESLIA VQYVDEVWKD KSPFLPSDPY QRAQARFWAD
101 FIDKKIYDIG RKIWTTKGDE QEAAKKEFIE ALKLLEGELG NKPYFGGESH
151 GYVDVALIPF YSWFYAYETC GNFSIEPECP VLIAWAKRCL QKESVSESVP
201 DPEKVYEFVL VLKKKFGIE
```

Spot No.: **D110 (S145)**

NCBI accession No.: **gi|30575570** Species: *Citrus x paradisi*

**PFF** score: **[87]**

Protein name: **HSP19 class II**

Matched peptides No.: **[1]** Sequence coverage %: **[15]**

Matched sequences: **K.VQVEDDNVLLISGER.K**

Calculated Mr: **11191**

Calculated pI: **8.01**

Probability Based Mowse Score:

Ions score is  $-10 \cdot \log(P)$ , where P is the probability that the observed match is a random event.

Individual ions scores  $> 45$  indicate identity or extensive homology ( $p < 0.05$ ).

Protein scores are derived from ions scores as a non-probabilistic basis for ranking protein hits.



Matched peptide sequences: shown in **Bold Red**:

```
1 YVFIVDMPGL KSGDIKVQVE DDNVLLISGE RKREEEKDGA KYVRMERRVG  
51 KFMRKFFVLPE NANVEAISAV CQDGVLTITV DKLPPPEPKK PKTIEVKIA
```

Spot No.: **D111 (S146)**

NCBI accession No.: **gi|37901124** Species: *Hevea brasiliensis*

**PFF** score: **[88]**

Protein name: **latex abundant protein 1**

Matched peptides No.: **[1]** Sequence coverage %: **[11]**

Matched sequences: **R.NKDDINCFNEYNPR.P**

Calculated Mr: **14618**

Calculated pI: **5.01**

Probability Based Mowse Score:

Ions score is  $-10 \cdot \log(P)$ , where P is the probability that the observed match is a random event.

Individual ions scores  $> 43$  indicate identity or extensive homology ( $p < 0.05$ ).

Protein scores are derived from ions scores as a non-probabilistic basis for ranking protein hits.



Matched peptide sequences: shown in **Bold Red**:

```
1  MPYYTRNKDD INCFNEYNPR PYIGGYDMAL TYGRPISACE ETCYPRSSSA
51 NEIDYDYPDF TWYVEPSAYN DDHLQEEYTS YARPKPRPAP NSLGSCPILG
101 GNDEEKHHH CHHQEKHCD DE
```

Spot No.: **D112 (S147)**

NCBI accession No.: **gi|359806300** Species: *Glycine max*

**PFF** score: **[173]**

Protein name: **uncharacterized protein LOC100784610**

Matched peptides No.: **[3]** Sequence coverage %: **[9]**

Matched sequences: **K.NTALHYAAGYGR.K;**

**R.YWNNEEVLQK.L;**

**R.TALHFACGYGEVK.C**

Calculated Mr: **38027**

Calculated pI: **4.53**

### Probability Based Mowse Score:

Ions score is  $-10 \cdot \log(P)$ , where P is the probability that the observed match is a random event. Individual ions scores  $> 45$  indicate identity or extensive homology ( $p < 0.05$ ). Protein scores are derived from ions scores as a non-probabilistic basis for ranking protein hits.

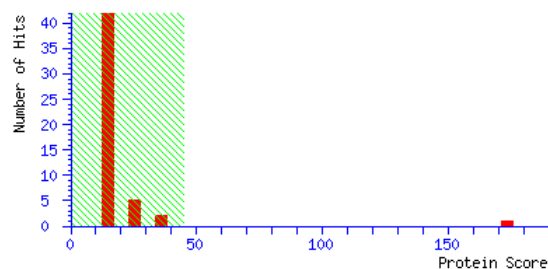

Matched peptide sequences: shown in **Bold Red**:

```
1 MASDSKKDFP ADDKAGTEES KTSKDETSSK DSPAEQRATA TFGPRPGPAG
51 HPGNPFDLA MSGLLNDFPSI KELAEQIAKD PSFNQMAEQL QKTFQGAPQD
101 AIPSFNQY FSTMQQVMQN PNFMTMAERL GNALMQDPSM SAMLESFSNP
151 SNKDQLEERM ARIKEDPSLK HILEELETGG PAAMMRYWNN EEVLQKLGQA
201 MGLANSGDAG ASAENSGADE TEDLGNEDES IVHHTASVGD VEGLKNALAS
251 GADKDEEDSE GRTALHFACG YGEVKCAQVL LEAGAKVDAL DKNKNTALHY
301 AAGYGRKECV ALLLENGAAV TLQNMDGKTP IDVAKLNNQN EVLKLEKDA
351 FL
```

Spot No.: **D113 (S148)**

NCBI accession No.: **gi|37625031** Species: *Vitis aestivalis*

**PFF** score: **[166]**

Protein name: **putative ankyrin-repeat protein**

Matched peptides No.: **[3]** Sequence coverage %: **[9]**

Matched sequences: **K.LNNQHEVLK.L;**

**K.NTALHYAAGYGR.K;**

**R.TALHFACGYGEVK.C**

Calculated Mr: **38089**

Calculated pI: **4.53**

### Probability Based Mowse Score:

Ions score is  $-10 \cdot \log(P)$ , where P is the probability that the observed match is a random event. Individual ions scores  $> 45$  indicate identity or extensive homology ( $p < 0.05$ ). Protein scores are derived from ions scores as a non-probabilistic basis for ranking protein hits.



Matched peptide sequences: shown in **Bold Red**:

```
1 MASNSDKDTP AGSAENSKSD SSSGESHSQ RRAAAAASVP GAGLPTNPFD
51 FSAMTGLLND PSIKELAEQI AKDPAFNQMA EQLQKTFHGA AVEESIPQFD
101 TQQYYSTMQQ VMQNPQFMTM AERLGNALMQ DPSMSSMLEN LANPTHKDQL
151 EERMARIKED PSLKPILDEI ETGGPAAMMR YWNDKDV LQK LGEAMGLAVS
201 GDAAASADNS GLDEAEELAN EDESIAHHS ESIVHDTASV GDVEGLKNAL
251 ASGADKDEED SEGRTALHFA CGYGEVKCAQ ILVEAGATVD ALDKNKNTAL
301 HYAAGYGRKE CVALLENGA AVTLQNMDGK TPIDVAKLNN QHEVLKLLEK
351 DAFL
```

Spot No.: **D114 (S149)**

NCBI accession No.: **gi|13310811** Species: *Nicotiana tabacum*

**PFF** score: **[71]**

Protein name: **putative ankyrin-repeat protein**

Matched peptides No.: **[2]** Sequence coverage %: **[7]**

Matched sequences: **K.NTALHYAAGYGR.K;**

**R.TALHFACGYGEVK.C**

Calculated Mr: **37522**

Calculated pI: **4.45**

Probability Based Mowse Score:

Ions score is  $-10 \cdot \log(P)$ , where P is the probability that the observed match is a random event. Individual ions scores  $> 45$  indicate identity or extensive homology ( $p < 0.05$ ). Protein scores are derived from ions scores as a non-probabilistic basis for ranking protein hits.



Matched peptide sequences: shown in **Bold Red**:

```
1  MSEGKVLPT  ASADEKSGAS  ENKKSSESSS  TEAPSGEART  TSTAAAGAGL
51  QNPFDFSAMS  GLLNDPSIKE  LAEQIAKDPA  FNQMAEQLQK  TFQGAAVEES
101 VPNFDSQQYY  STMQQVMQNP  QFMTMAERLG  NALMQDPSMS  GMLESLSNPA
151 QKEQIEERMA  RIKEDPSLKP  ILEEIESGGP  AAMRYWWDQ  ETLKKIGEAM
201 GFAAGGEGAT  SSAIPGTDET  EEANEDESIV  HQCASVGDAE  GLKAALTAGA
251 DKDEEDSEGR  TALHFACGYG  EVKCAQILLE  AGAKVDALDK  NKNTALHYAA
301 GYGRKECVAL  LLENGAAVTL  QNLDGKTPID  VAKLNNQGEV  LKLEKDVFL
```

Spot No.: **D115 (S151)**

NCBI accession No.: **gi|378464888**

Species: *Ammopiptanthus mongolicus*

**PFF** score: **[117]**

Protein name: **translation elongation factor**

Matched peptides No.: **[2]**

Sequence coverage %: **[11]**

Matched sequences: **R.WFNHIDALLR.I;**

**K.SSVLLDVKPWDDETDMK.K**

Calculated Mr: **25300**

Calculated pI: **4.50**

Probability Based Mowse Score:

Ions score is  $-10 \cdot \log(P)$ , where P is the probability that the observed match is a random event. Individual ions scores  $> 45$  indicate identity or extensive homology ( $p < 0.05$ ). Protein scores are derived from ions scores as a non-probabilistic basis for ranking protein hits.

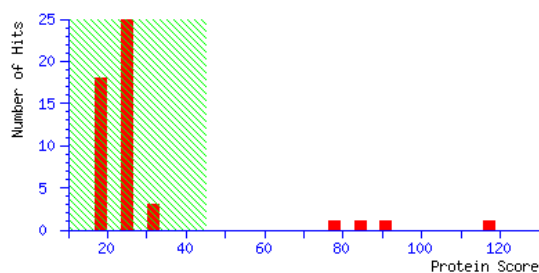

Matched peptide sequences: shown in **Bold Red**:

```
1  MVLTLYNLSS  EPGLKKLDEY  LLSRSYITGY  QASKDDLTVY  AALPEVPSDK
51  YVNVSRWFNH  IDALLRISGV  SGEGSGVTVE  GSAPVAEETI  ATPPAADTKA
101 TAAEDDDDDV  DLFGETETEE  KKAEEERAAS  VKASVKKKES  GKSSVLLDVK
151 PWDETDMKK  LKEAVRSVSM  EGLHWGASKL  VPVGYGIKKL  QIMLTIVDDL
201 VSVDNLIEEQ  LQVEPINEYV  QSCDIVAFNK  I
```

Spot No.: **D116 (S153)**

NCBI accession No.: **gi|22261807** Species: *Solanum tuberosum*

**PFF** score: **[132]**

Protein name: **Light-induced protein, chloroplastic**

Matched peptides No.: **[1]** Sequence coverage %: **[8]**

Matched sequences: **K.FEEGIIGTPQLTDSIVLPENVEFLGQK.I**

Calculated Mr: **35671**

Calculated pI: **5.26**

Probability Based Mowse Score:

Ions score is  $-10 \cdot \log(P)$ , where P is the probability that the observed match is a random event. Individual ions scores  $> 45$  indicate identity or extensive homology ( $p < 0.05$ ). Protein scores are derived from ions scores as a non-probabilistic basis for ranking protein hits.

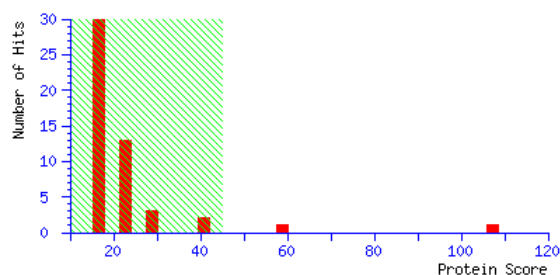

Matched peptide sequences: shown in **Bold Red**:

```
1 MAVTFYGVNS GSGLKKLDEY LLRSYISGY QASKDDITVH AALSKAPSSE
51 YVNSRWYNH IESLLRISGV SGEGCGVTIE GFAPVDAVAT PPAEDTKATA
101 AEDDDDDVD LFGREETEEK KAAEAAAAV KASGKKKESG KSSVLLDVKP
151 WDEETDMKKL EEAVRSIKME GLLWGASKLV PVGYGIKKLQ IMLTIVDDLQ
201 SVDDLIEEQL TVEPTNEYVQ SCDIVAFNKI
```



Spot No.: **D117 (S161)**

NCBI accession No.: **gi|147805616** Species: *Vitis vinifera*

**PFF** score: **[136]**

Protein name: **hypothetical protein VITISV\_028800**

Matched peptides No.: **[3]** Sequence coverage %: **[10]**

Matched sequences: **R.GPYPADQVVR.D;**

**R.DRGPYPADQVVR.D;**

**K.TANEVIIVIEAYR.T**

Calculated Mr: **27385**

Calculated *pI*: **5.64**

### Probability Based Mowse Score:

Ions score is  $-10 \cdot \log(P)$ , where  $P$  is the probability that the observed match is a random event. Individual ions scores  $> 45$  indicate identity or extensive homology ( $p < 0.05$ ). Protein scores are derived from ions scores as a non-probabilistic basis for ranking protein hits.



Matched peptide sequences: shown in **Bold Red**:

```
1  MLAVFHKSIA  EAPEGLRTPD  SASLPALKDG  FLPQFFASLH  PSAVTVNLGS
51  SGAISYSVDK  QNLLPRLFA  VDDIFCLFQ  GHIENVALLK  QQYGLNKTAN
101 EVIIVIEAYR  TLRDRGPYPA  DQVVRDLHGK  FAFVLYDSSN  RTAFLAADAD
151  ESVPFFWGVD  SEGHLVLSDD  EETVKKGCGK  SFAPFPKGC  FTTSGGLRSF
201  EHPLNELRAE  PRVDSSGQVC  GANFKVDVEA  KKETGMPRVG  SAANWSTHY
```

Spot No.: **D118 (S164)**

NCBI accession No.: **gi|225428086** Species: *Vitis vinifera*

**PFF** score: **[377]**

Protein name: **V-type proton ATPase subunit B 1**

Matched peptides No.: **[10]** Sequence coverage %: **[23]**

Matched sequences: **K.YQEIVNIR.L;K.FVAQGAYDTR.N;**

**R.DFEENGSMER.V;R.RGQVLEVDGEK.A;  
R.KFVAQGAYDTR.N;K.YTTVQFTGEVLK.T;  
R.QIYPPINVLPSLSR.L;R.VTLFLNLANPTIER.I;  
R.GYPGYMYTDLATYIER.A;  
R.RDHADVSNQLYANYAIGK.D**

Calculated Mr: **54367**

Calculated pI: **5.04**

Probability Based Mowse Score:

#### Mascot Score Histogram

Ions score is  $-10 \cdot \log(P)$ , where P is the probability that the observed match is a random event. Individual ions scores  $> 45$  indicate identity or extensive homology ( $p < 0.05$ ). Protein scores are derived from ions scores as a non-probabilistic basis for ranking protein hits.

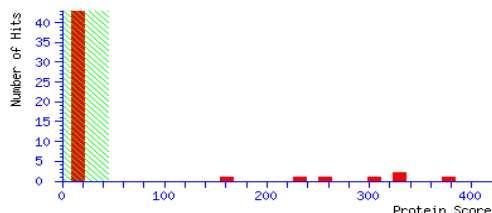

Matched peptide sequences: shown in **Bold Red**:

```
1  MGVEQNNHDA  EEGTLLVGME  YRTVSGVAGP  LVILEKVKGP  KYQEIVNIRL
51  GDGTTRRGQV  LEVDGEKAVV  QVFEGTSGID  NKYTTVQFTG  EVLKIPVSLD
101 MLGRIFNGSG  KPIDNGPPIL  PEAYLDISGS  SINPSERTYP  EEMIQTGIST
151 IDVMNSIARG  QKIPLFSAG  LPHNEIAAQI  CRQAGLVKRL  EKSGSLEDV
201 EEDNFAIVFA  AMGVNMQTAQ  FFKRDFEENG  SMERVTLFLN  LANDPTIERI
251 ITPRIALTTA  EYLAYECGKH  VLVILTDMSS  YADALREVSA  AREEVPGRRG
301 YPGYMYTDLA  TIYERAGRIE  GRKGSITQIP  ILTMPNDDIT  HPTPDLTGVI
351 TEGQIYIDRQ  LHNRQIYPPI  NVLPSLSRLM  KSAIGGMTR  RDHADVSNQL
401 YANYAIGKDV  QAMKAVVGEE  ALSSEDLLYL  EFLDKFERKF  VAQGAYDTRN
451 IFQSLDLAWT  LLRIFPRELL  HRIPAKTLDQ  YYSREASN
```

Spot No.: **D119 (S165)**

NCBI accession No.: **gi|224071449** Species: *Populus trichocarpa*

PFF score: **[59]**

Protein name: **predicted protein**

Matched peptides No.: **[1]**

Sequence coverage %: **[2]**

Matched sequences: **K.IDVIPHYPGRL**

Calculated Mr: **47121**

Calculated pI: **5.28**

Probability Based Mowse Score:

Ions score is  $-10 \cdot \log(P)$ , where P is the probability that the observed match is a random event. Individual ions scores  $> 44$  indicate identity or extensive homology ( $p < 0.05$ ). Protein scores are derived from ions scores as a non-probabilistic basis for ranking protein hits.

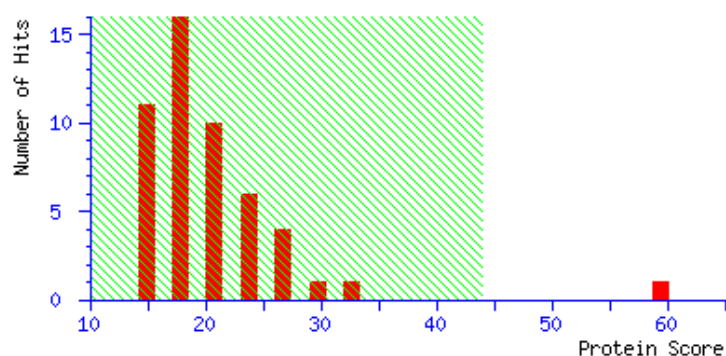

Matched peptide sequences: shown in **Bold Red**:

```
1  MDGTSEATWP  EILGSRNWDN  LLDPLDLSLR  KLILRCGDFC  QATYDAFNND
51  QNSRYCGTSR  YGKRNFHFKV  MLDNPENYQV  SSFLYATARV  SLPEAFLLHS
101 LSRDSDWRET  NWIGYIAVTS  DEQTKTLGRR  EIYIAFRGTT  RNYEVDILG
151 AKLKSAPLL   RGATSTTHDQ  ESSSSDDEDD  DKVPKVMLGW  LTMYSISDDPN
201 SPFTKLSARA  QLLAHIKELR  ERYKDDDLSE  IFTGHSLGAS  LSILSAFDLV
251 ENGITDIPVS  AFVFGSPQVG  NKEFNERFNK  YPNLKVLHIK  NKIDVIPHY
301 GRLMGYVYTG  IEFIDTRKS   PSLKDSKNPS  DWHNLQAMLH  IVAGWNGEEQ
351 EFELKVKRSL  ALVNKSSEFL  KDECLVPGIW  WVEKNKGMVR  NEDGEWVLAP
401 PDEEDLPVPE  C
```

Spot No.: **D120 (S166)**

NCBI accession No.: **gi|116789736** Species: *Picea sitchensis*

Protein name: **unknown**

**PMF** Mascot score: **81**

Sequence coverage %: **60**

Matched peptides No.: **6**

Total peptides No.: **48**

Calculated Mr: **13436**

Calculated pI: **5.91**

Probability Based Mowse Score:

Protein score is  $-10 \cdot \log(P)$ , where P is the probability that the observed match is a random event. Protein scores greater than 73 are significant ( $p < 0.05$ ).

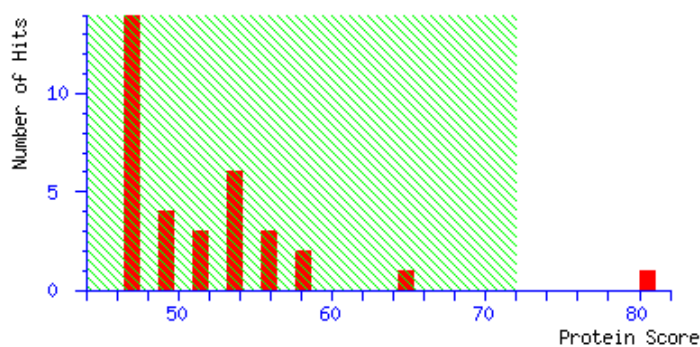

Matched peptide sequences: shown in **Bold Red**:

```
1  MPSHSLIGTT TTNRRGSMED YPNPFNPETI HELFKLVWSQ TNKARAQKEG  
51 GETELEVGAA ASKKTRTTTA NSNALKLSCE FLRLFVTEAV QRAAIVAEVE  
101 GSTQIEGTHL ERILPQLLLD F
```

Spot No.: **D121 (S167)**

NCBI accession No.: **gi|115392253**

Species: *Cercocarpus betuloides*

**PFF** score: **[51]** Protein name: **polyphenol oxidase**

Matched peptides No.: **[1]** Sequence coverage %: **[3]**

Matched sequences: **K.EKEQEEEEILVIEGIEFDR.D**

Calculated Mr: **51023**

Calculated pI: **5.98**

Probability Based Mowse Score:

Ions score is  $-10 \cdot \log(P)$ , where P is the probability that the observed match is a random event. Individual ions scores  $> 45$  indicate identity or extensive homology ( $p < 0.05$ ). Protein scores are derived from ions scores as a non-probabilistic basis for ranking protein hits.

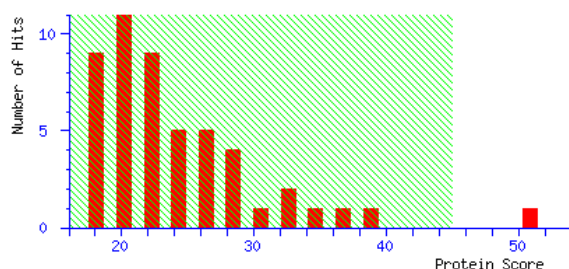

Matched peptide sequences: shown in **Bold Red**:

```
1 PFAFAKPVAP PDVSKCGAAD LPTGAQPTNC CPPVASKIID FKLPSPTPLR VRPAAHAVDK
61 AYIEKYSKAI ELMKALPDDD PRSFKQQANV HCAYCDGAYD QAGFPDLELQ IHNSWLFFPF
121 HRYLYPFHEK ILGSLIGDPT FALPFWNWDA PAGMPLPAIY ANPKSPLYDK FRAANHQPPT
181 LVDLDFNGTE DAASNETQIN ANLKIMYRQM VSNARTPQLF FGNPYRAGDE FDPGGGSIEG
241 TPHGPFVHLWT GDNTQPNFED MGNFYASGRD PIFFAHHSNV DRLWSIWKTL GGKRTDITDT
301 DWLDSGFLFY DENAQMVRVK VRDCLESKNL GYVYQDANIP WLESKPTPRR VKAALGKIAK
361 KLHVAHAADN SSASKVVARA AFPIAKLDTK MSTVVARPKQ KKRSKKEKEQ EEEILVIEGI
421 EFDRDVAVKF DVYVNDEDDL PSGPDKSEFA GSFVS
```

Spot No.: **D122 (S168)**

NCBI accession No.: **gi|225430941**

Species: *Vitis vinifera*

**PFF** score: **[210]**

Protein name: **regulator of ribonuclease-like protein 2**

Matched peptides No.: **[3]** Sequence coverage %: **[24]**

Matched sequences: **K.VFEDNVLIR.E;**

**R.DVDEINGCDIGVR.A;**

**R.ISDGEWLYADTDGILISR.T**

Calculated Mr: **17984**

Calculated pI: **5.39**

### Probability Based Mowse Score:

Ions score is  $-10 \cdot \log(P)$ , where P is the probability that the observed match is a random event. Individual ions scores  $> 45$  indicate identity or extensive homology ( $p < 0.05$ ). Protein scores are derived from ions scores as a non-probabilistic basis for ranking protein hits.



Matched peptide sequences: shown in **Bold Red**

```
1 MALVTTAEVC DANPQLIVSG ELRALQPVEQ IYGRRPVFSG PIVTLKVFED
51 NVLIREFLEE KGNGRVLVVD GGGSMRCAIL GGNPVVQAQN NGWAGIVVNG
101 CIRDVDEING CDIGVRALNS HPMKANKKGI GEKHVPIAIA GTRISDGEWL
151 YADTDGILIS RTELSV
```

Spot No.: **D123 (S171)**

NCBI accession No.: **gi|115392253**

Species: *Cercocarpus betuloides*

**PFF** score: **[104]** Protein name: **actin depolymerizing factor**

Matched peptides No.: **[1]** Sequence coverage %: **[4]**

Matched sequences: **K.EKEQEEEILVIEGIEFDR.D**

Calculated Mr: **58369**

Calculated pI: **9.23**

Probability Based Mowse Score:

Ions score is  $-10 \cdot \log(P)$ , where P is the probability that the observed match is a random event.

Individual ions scores > 40 indicate peptides with significant homology.

Individual ions scores > 44 indicate identity or extensive homology ( $p < 0.05$ ).

Protein scores are derived from ions scores as a non-probabilistic basis for ranking protein hits.



Matched peptide sequences: shown in **Bold Red**:

```
1 PFAFAKPVAP PDVSKCGAAD LPTGAQPTNC CPPVASKIID FKLPSPTPLR VRPAHAHVDK
61 AYIEKYSKAI ELMKALPDDD PRSFKQQANV HCAYCDGAYD QAGFPDLELQ IHNSWLFFPF
121 HRYLYLPHEK ILGSLIGDPT FALPFWNWDA PAGMPLPAIY ANPKSPLYDK FRAANHQPPT
181 LVDLDFNGTE DAASNETQIN ANLKIMYRQM VSNARTPQLF FGPNPYRAGDE PDPGGGSIEG
241 TPHGFVHLWT GDNTQPNFED MGNFYASAGR PIFFAHHSNV DRLWSIWKTL GGRKTDITDT
301 DWLDSGFLFY DENAQMVRVK VRDCLESKNL GYVYQDANIP WLESKPTPRR VKAALGKIAK
361 KLHVAHAADN SSASKVVARA AFPIAKLDTK MSTVVARPKQ KKRSKKEKEQ EEEILVIEGI
421 EFDRDVAVKF DVYVNDEDDL PSGPDKSEFA GSFVS
```

Spot No.: **D124 (S177)**

NCBI accession No.: **gi|357480975** Species: *Medicago truncatula*

**PFF** score: **[369]**

Protein name: **Proteasome subunit beta type**

Matched peptides No.: **[7]** Sequence coverage %: **[42]**

Matched sequences: **K.NVALYQFR.N;**

**R.VQFTEYIQK.N;**

**R.LVVAPPNFVIK.I;**

**R.NGIPLTTAAAANFTR.G;**

**K.GAFGYGSYFSLSMMDR.H;**

**K.ETGPSLYYIDYIATLHK.L;**

**K.LIAASGEPGDRVQFTEYIQK.N**

Calculated Mr: **22572**

Calculated *pI*: **6.06**

Probability Based Mowse Score:

Ions score is  $-10 \cdot \log(P)$ , where *P* is the probability that the observed match is a random event. Individual ions scores > 45 indicate identity or extensive homology ( $p < 0.05$ ). Protein scores are derived from ions scores as a non-probabilistic basis for ranking protein hits.



Matched peptide sequences: shown in **Bold Red**:

```
1  MECVFGLVGN  GFAIVVADTS  AVHSILVHKS  NEDKIMFLDS  HKLIAASGEP
51 GDRVQFTEYI QKNVALYQFR NGIPLTTAAA ANFTRGELAT ALRKNPYSVN
101 ILLAGYDKET GPSLYYIDYI ATLHKLEKGA FGYGSYFSL MMDRHFHSGM
151 NVEEAIDLVD  KCILEIRSRL  VVAPPNFVIK  IVDKDGAREY  AWRESVKDTP
201 ASA
```



Spot No.: **D125 (S187)**

NCBI accession No.: **gi|380468126** Species: *Hevea brasiliensis*

**PFF** score: **[123]**

Protein name: **caffeic acid 3-O-methyltransferase**

Matched peptides No.: **[3]**

Sequence coverage %: **[11]**

Matched sequences: **K.NPEAPVLLDR.M;**

**K.SWYHLNEAILEGGTPFNR.A;**

**R.AYGMNQFEYPGTDQR.F + Oxidation (M)**

Calculated Mr: **40957**

Calculated pI: **5.54**

Probability Based Mowse Score:

Ions score is  $-10 \cdot \log(P)$ , where P is the probability that the observed match is a random event.

Individual ions scores > 45 indicate identity or extensive homology ( $p < 0.05$ ).

Protein scores are derived from ions scores as a non-probabilistic basis for ranking protein hits.

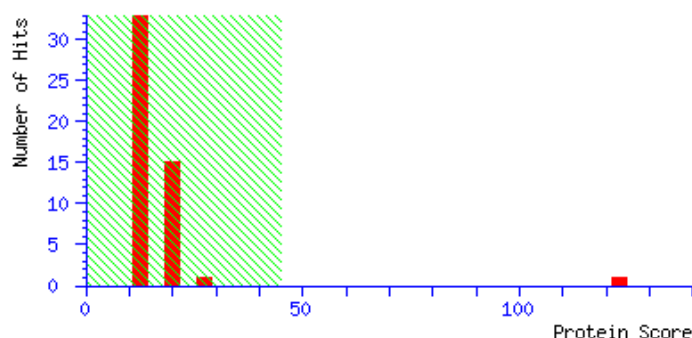

Matched peptide sequences: shown in **Bold Red**:

```
1  MTGSEQNSA  SIMSGRSDEE  TWNLAIDLAN  TVILPMVLKS  ALELNVIDII
51  STAGNSGASL  SAPEIAQRIP  EAKNPEAPVL  LDRMLRLLAT  YDIVKCSSNT
101 KENGEVERLY  APGPICKFLT  KNKNGSGSAA  PLLLLHHDEV  FMKSWYHLNE
151 AILEGGTPFN  RAYGMNQFEY  PGTDQRFNRV  FNDAMSSYTT  YLVKKILDAY
201 KGF DGLKSLV  DVG GNSGVTL  NSITSKYPHI  KGINYDLPHV  LADAPSYPGV
251 EHVAGDMFKS  VPKGDAILK  WVLHDWDDDL  CLKLLKNCWE  ALPSNGKVIV
301 VESILPTVPE  NNVTSQVLHK  EDLMLLSFNV  G GKERTRQEF  EALASKSGFS
351 SCEFICCAYN  SWVIEFHK
```

Spot No.: **D126 (S188)**

NCBI accession No.: **gi|380468126** Species: *Hevea brasiliensis*

**PFF** score: **[117]**

Protein name: **caffeic acid 3-O-methyltransferase**

Matched peptides No.: **[2]**

Sequence coverage %: **[8]**

Matched sequences: **K.SWYHLNEAILEGGTPFNR.A;**

**R.AYGMNQFEYPGTDQR.F + Oxidation (M)**

Calculated Mr: **40957**

Calculated pl: **5.54**

Probability Based Mowse Score:

Ions score is  $-10 \cdot \log(P)$ , where P is the probability that the observed match is a random event.

Individual ions scores  $> 44$  indicate identity or extensive homology ( $p < 0.05$ ).

Protein scores are derived from ions scores as a non-probabilistic basis for ranking protein hits.

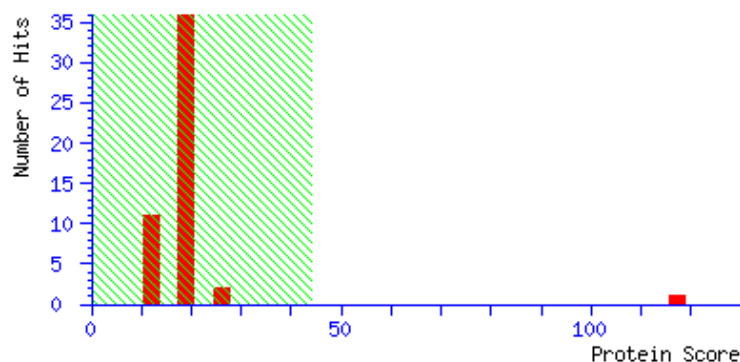

Matched peptide sequences: shown in **Bold Red**:

```
1  MTGSEQSNSA  SIMSGRSDEE  TWNLALDLAN  TVILPMVLKS  ALELNVIDII
51  STAGNSGASL  SAPEIAQRIP  EAKNPEAPVL  LDRMLRLLAT  YDIVKCSNT
101 KENGEVERLY  APGPICKFLT  KNKNGSGSAA  PLLLLHHDEV  FMKSWYHLNE
151 AILEGGTPFN  RAYGMNQFEY  PGTDQRFNRV  FNDAMSSYTT  YLVKKILDAY
201  KGF DGLKSLV  DVG GNSGVTL  NSITSKYPHI  KGINYDLPHV  LADAPSYPGV
251  EHVAGDMFKS  VPKGDAILK  WVLHDWNDL  CLKLLKNCWE  ALPSNGKVIV
301  VESILPTVPE  NNVTSQVLHK  EDLMLLSFNV  GPKERTRQEF  EALASKSGFS
351  SCEFICCAYN  SWVIEFHK
```

Spot No.: **D127 (S189)**

NCBI accession No.: **gi|284433794** Species: *Jatropha curcas*

**PFF** score: **[159]**

Protein name: **glutathione S-transferase omega**

Matched peptides No.: **[3]**

Sequence coverage %: **[10]**

Matched sequences: **K.IIGESLDLIK.Y;**

**K.YDITAGRPK.L;**

**K.ELVEFYK.K**

Calculated Mr: **27480**

Calculated pI: **5.41**

Probability Based Mowse Score:

Ions score is  $-10 \cdot \log(P)$ , where P is the probability that the observed match is a random event.

Individual ions scores  $> 45$  indicate identity or extensive homology ( $p < 0.05$ ).

Protein scores are derived from ions scores as a non-probabilistic basis for ranking protein hits.



Matched peptide sequences: shown in **Bold Red**:

```
1  MAATALDKSL  PEKLPPILDA  TAEQPPLFDG  TIRLYTSYAC  PFAQRVWITR
51  NYKGLQDKIK  LVPLNLQNRP  SWYGEKVYPA  NKVPALEHNG  KIIGESLDLI
101 KYIDANFEGP  SLLPDDPAKK  EFAEELFSYT  DTFTKTVFTS  FKGDVAKDAS
151  PAFDYLENAL  HKFEDGPPLL  GQFSLVDIAY  IPFVERFQIF  FSEVFKYDIT
201 AGRPKLAAWI  EEMNKIEAYK  QTKTDPKELV  EFYKKRLLAQ
```

Spot No.: **D128 (S190)**

NCBI accession No.: **gi|255567721** Species: *Ricinus communis*

**PFF** score: **[52]**

Protein name: **carboxymethylenebutenolidase, putative**

Matched peptides No.: **[1]** Sequence coverage %: **[6]**

Matched sequences: **K.SMGMPDEDEAAVELAWSR.F + 2 Oxidation (M)**

Calculated Mr: **30833**

Calculated pI: **6.09**

### Probability Based Mowse Score:

Ions score is  $-10 \cdot \log(P)$ , where P is the probability that the observed match is a random event. Individual ions scores  $> 45$  indicate identity or extensive homology ( $p < 0.05$ ). Protein scores are derived from ions scores as a non-probabilistic basis for ranking protein hits.



Matched peptide sequences: shown in **Bold Red**:

```
1  MLAAAIRSLS  PSSTSSIFNK  SALPPLLRSL  SPSLNSRFQ  IRSMADSASS
51  PFKKVQIHRD  NTTFDAYVIG  KDDAPGIVVV  QEWWGVDFEI  KNHAEKISQL
101 EPGFKALIPD  LYRGKVGLDV  AEAQHLM DGL  DWQGAVKDIG  ASVNWLKANG
151 SKKAGVTGFC  MGGALAIASS  VLVPEVDAVV  AFYGVPPSEL  ADATQAKAPI
201 QAHFGELDNE  VGFADITAAK  ALEEKLKASG  VPSEVHIYPG  NAHAFMNRSA
251 EGVKRRKSMG MPDEDEAAVE LAWSRFRSWM  NQYLSA
```

Spot No.: **D192 (S129)**

NCBI accession No.: **gi|255542380** Species: *Ricinus communis*

Protein name: *cysteine synthase, putative*

**PMF** Mascot score: **82**

Sequence coverage %: **37**

Matched peptides No.: **13**

Total peptides No.: **59**

Calculated Mr: **34435**

Calculated pI: **5.50**

Probability Based Mowse Score:

Protein score is  $-10 \cdot \log(P)$ , where P is the probability that the observed match is a random event. Protein scores greater than 73 are significant ( $p < 0.05$ ).



Matched peptide sequences: shown in **Bold Red**:

```
1  MVEEKSAIAK  DVTELVGKTP  LVYLNHVVDG  CVARIAAKLE  MMEPCSSVKD
51  RIGYSMITDA  EEKGLIKPGE  SVLIEPTSGN  TGIGLAFMAA  AKGYKLIITM
101 PASMSLERRM  VLRAFGAELV  LTDPARGMKG  AVQKAE EILA  KTPNSYILQQ
151  FENPANPKIH  YETTGPE  IWK  GSGGKVDFFV  SGIGTGGTV  T  GAGGYLREQ  N
201  PDIKLIGV  EEP  VESAVLSGGK  PGPH  KIQGIG  AGFIPGVLDV  SLLDEVV  QIS
251  SEEAIETAKL  LALKEGLL  VG  ISSGAAAAAAA  IKIARRP  ENA  GKL  IVVIFP  S
301  FGERYLS  SVL  FES  VKREAE  S  MVF  EP
```

Spot No.: **D130 (S197)**

NCBI accession No.: **gi|351727028** Species: *Glycine max*

Protein name: **cell division cycle protein 48 homolog**

**PMF** Mascot score: **174**

Sequence coverage %: **42**

Matched peptides No.: **37**

Total peptides No.: **90**

Calculated Mr: **90512**

Calculated pI: **5.18**

Probability Based Mowse Score:

Protein score is  $-10 \cdot \log(P)$ , where P is the probability that the observed match is a random event. Protein scores greater than 73 are significant ( $p < 0.05$ ).



Matched peptide sequences: shown in **Bold Red**:

```
1 MSQQGESSDF KSGKKDFSTA ILERKKSPNR LVVDEAVNDD NSVVTMHPQT
51 MEKLQLFRGD TILIKGKRRK DTICIALADE NCEEPKIRMN KVVRSNLRVR
101 LGDVVSVHQC PDVKYGKRVH ILPIDDTIEG VTGNLFD AFL KPYFLEAYRP
151 VRKGDLFLVR GGMRSVEFKV VETDPGEYCV VAPDTEIFCE GEPLKREDEE
201 RLDEVGYYDDV GGVRKQMAQI RELVELPLRH PQLFKSIGVK PPKGILLYGP
251 PGSGKTLIAR AVANETGAFF FCINGPEIMS KLAGESESNL RKAFEEAEKN
301 APSIIFIDEI DSIAPKREKT HGEVERRIVS QLLTLMDGLK SRAHVIVIGA
351 TNRPNSIDPA LRRFGRFDRE IDIGVPDEVG RLEVLRIHTK NMKLSDDVDL
401 ERIAKDTHY VGADLAALCT EAALQCIREK MDVIDLEDET IDAEVLNSMA
451 VTNEHFQTAL GTSNPSALRE TVVEVPNVSW EDIGGLENVK RELQETVQYP
501 VEHPEKFEKF GMSPSKGVLF YGPPGCGKTL LAKAIANECQ ANFISVKGPE
551 LLTMWFGESE ANVREIFDKA RQSAPCVLFF DELDSIATQR GSSVGDAGGA
601 ADRVLNQLLT EMDGMSAKKT VFIIGATNRP DIIDPALLRP GRLDQLIYIP
651 LPDEDSRHQI FKACLRKSPI AKNVDLRALA RHTQGFSGAD ITEICQRACK
701 YAIARENIEKD IERERKSREN PEAMDEDTV DVAEIKAAH FEESMKFARR
751 SVSDADIRKY QAFAQTLQQS RGFGSEFRFP ESGDRTTTGS DPFAASAGGA
801 DEDDLYS
```

Spot No.: **D131 (S218)**

NCBI accession No.: [gi|14916100](#) Species: *Hevea brasiliensis*

PFF score: **[802]**

Protein name: **hydroxymethylglutaryl coenzyme A**

Matched peptides No.: **[10]** Sequence coverage %: **[35]**

Matched sequences: [R.LVFNDFVR.N](#); [K.ARHELPPEK.F](#);

[K.TFLMQIFEK.F](#) + Oxidation (M);

[K.VSQQVAKPLYDAK.V](#); [K.LAPFSNLSGDESYQNR.D](#);

[R.YGLVVCTDSAVYAEGPAR.P](#);

[K.QFSISDAEYFVFHSPYK.L](#);

[K.DCSLLASGTYYLTEVDSL.YR.R](#);

[R.GSHMSHAYDFYKPNLASEYPPVVDGK.L](#) + Oxidation (M);

[K.NVGILAVDIYFPPTFVQEALEAHDGASK.G](#)

Calculated Mr: **51761**

Calculated pI: **6.86**

Probability Based Mowse Score:

Ions score is  $-10 \cdot \log(P)$ , where P is the probability that the observed match is a random event. Individual ions scores  $> 45$  indicate identity or extensive homology ( $p < 0.05$ ). Protein scores are derived from ions scores as a non-probabilistic basis for ranking protein hits.



Matched peptide sequences: shown in **Bold Red**:

```
1  MAKNVGILAV DIYFPPTFVQ QEALEAHDGA SKGKYTIGLG QDCMAFCTEV
51  EDVISMSLTA VTSLLDKYNI DPKQIGRLEV GSETVIDKSK SIKTFLMQIF
101 EKFGNTDIEG VDSTNACYGG TAALFNCVNW VESSWDGRY GLVVCTDSAV
151 YAEGPARPTG GAAAIAILVG PDAPIAFESK FRGSHMSHAY DFYKPNLASE
201 YPPVVDGKLSQ TCYLMALDSC YKHFCAKYEK FEGKQFSISD AEYFVFHSPY
251 NKLVQKSFAR LVFNDFVRNA RSIDETAKEK LAPFSNLSGD ESYQNRDLEK
301 VSQQVAKPLY DAKVKPTTLI PKQVGNMYTA SLYAAFASLL HSKHTELAGK
351 RVTLFSYGSG LTATMFSLRL HEGQHPFSLS NIASVMNVAG KLKARHELPP
401 EKFVNIMKLM EHRYGAKDFV RSKDCSLLAS GTYYLTEVDS LYRRFYAQKA
451 VGNTVENGLL ANGH
```

Spot No.: **D132 (S221)**

NCBI accession No.: **gi|357514973** Species: *Medicago truncatula*

PFF score: **[99]**

Protein name: **Annexin D4**

Matched peptides No.: **[2]**

Sequence coverage %: **[3]**

Matched sequences: **K.LLVALVSAYR.Y;**

**R.KLLVALVSAYR.Y**

Calculated Mr: **36283**

Calculated pI: **8.64**

Probability Based Mowse Score:

Ions score is  $-10 \cdot \log(P)$ , where P is the probability that the observed match is a random event. Individual ions scores  $> 45$  indicate identity or extensive homology ( $p < 0.05$ ). Protein scores are derived from ions scores as a non-probabilistic basis for ranking protein hits.

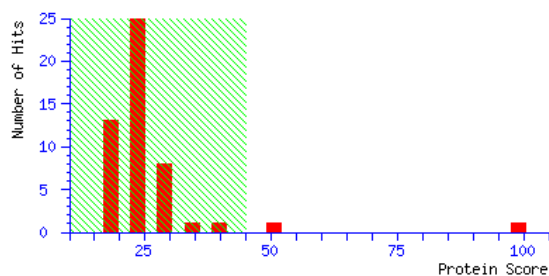

Matched peptide sequences: shown in **Bold Red**:

```
1  MAFNQELEAI  TQAFSGHGVD  EKSLIAVLGK  WDPLERETYR  KKTSHFFIED
51  HERQFQRWND  HCVRLKHEF  VRFKNAVVLW  SMHPWERDAR  LAKEALKKGS
101 ISYGVLEIEA  CTRSSEELG  ARKAYHSLFD  HSIEEDVASH  IHGNDRKLLV
151 ALVSAYRYEG  TKVKDDTAKS  EAKTLSNAIK  NAQNKPIVED  DEVIRILATR
201 SKLHLQAVYK  HYKEISGKNL  EEDLNDLRFK  ETVQCLCTPQ  VYFSKVLDAE
251 LKNDVNKNIK  KSLTRVIVTR  ADIDMKEIKA  EYNNLYGVSL  PQKIEETAKG
301 NYKDFLLTLI  ARGG
```



Spot No.: **D133 (S222)**

NCBI accession No.: [gi|21536853](#) Species: *Arabidopsis thaliana*

PFF score: **[314]**

Protein name: **phosphoglycerate kinase, putative**

Matched peptides No.: **[6]** Sequence coverage %: **[17]**

Matched sequences: [K.YSLKPLVPR.L](#);

[K.ELDYLVGAVANPK.K](#);

[K.YLKPSVAGFLMQK.E + Oxidation \(M\)](#);

[K.GVSLLLPTDVVIADK.F](#);

[K.LAALADVYVNDAFGTAHR.A](#);

[K.KLAALADVYVNDAFGTAHR.A](#)

Calculated Mr: **42178**

Calculated pI: **5.49**

Probability Based Mowse Score:

Ions score is  $-10 \cdot \log(P)$ , where P is the probability that the observed match is a random event. Individual ions scores  $> 45$  indicate identity or extensive homology ( $p < 0.05$ ). Protein scores are derived from ions scores as a non-probabilistic basis for ranking protein hits.



Matched peptide sequences: shown in **Bold Red**:

```
1  MATKRSVGTI KEADLKGKSV FVRVDLNVPL DDNSNITDDT RIRAAVPTIK
51  YLMGNGSRVV LCSHLGRPKG VTPKYSLKPL VPRLSELLGV EVVMANDSIG
101 EEVQQLVAGL PEGGVLLLEN VRFYAEEEKN DPEFAKKLAA LADVYVNDAF
151 GTAHRAHAST EGVAKYLKPS VAGFLMQKEL DYLVGAVANP KKPFAAIVGG
201 SKVSTKIGVI ELLNTVDIL LLGGGMIFTF YKAQGLSVGS SLVEEDKLDL
251 AKSLMEKAKA KGVSLLLPTD VVIADKFAPD ANSKIVPATA IPDGWMGLDI
301 GPDSIKTFSE ALDTTKTIIW NGPMGVFEFD KFAAGTEAVA KQLAELSGKG
351 VTTIIGGGDS VAAVEKVGLA DKMSHISTGG GASLELIEGK PLPGVLALDE
401 A
```

Spot No.: **D134 (S223)**

NCBI accession No.: [gi|255547137](#) Species: *Ricinus communis*

PFF score: [77]

Protein name: [Alpha-1,4-glucan-protein synthase](#)

Matched peptides No.: [2] Sequence coverage %: [5]

Matched sequences: [K.DINALEQHIK.N](#);

[K.VICDHLGFGVK.T](#)

Calculated Mr: **41557**

Calculated pI: **5.82**

Probability Based Mowse Score:

Ions score is  $-10 \cdot \log(P)$ , where P is the probability that the observed match is a random event. Individual ions scores  $> 46$  indicate identity or extensive homology ( $p < 0.05$ ). Protein scores are derived from ions scores as a non-probabilistic basis for ranking protein hits.



Matched peptide sequences: shown in **Bold Red**:

```
1  MADFAAISPT  PLLKDELDIRV  IPTIRNLDFL  EMWRPFFQPY  HLIIVQDGDV
51  SKIIKVPEGF  DYELYNRNDI  NRILGPKASC  ISFKDSACRC  FGYMVSKKKY
101 IYTIDDDCFV  AKDPSGKDIN  ALEQHIKNLL  CPSTPFFFNT  LYDPYRTGAD
151 FVRGYPFSLR  EGVPTAVSHG  LWLNIPDYDA  PTQLVKPLER  NTRYVDAVMT
201 IPKGTLFPMC  GMNLAFNREL  IGPAMYFGLM  GDGQPIGRYD  DMWAGWCTKV
251 ICDHLGFGVK  TGLPYIYHSK  ASNPFVNLKK  EYKGIYWQEE  LIPFFQSAVL
301 PKECTTVQKC  YIELSKQVRA  KLGKIDEYFV  KLADAMVTWV  EAWDELNPSG
351 NSGELPNGAA  K
```

Spot No.: **D135 (S227)**

NCBI accession No.: [gi|333690873](#)

Species: *Hevea brasiliensis*

PFF score: **[386]**

Protein name: [glutathione-S-transferase tau 1](#)

Matched peptides No.: **[8]**

Sequence coverage %: **[29]**

Matched sequences: [R.FWADFIDK.K](#);

[K.VYEFVLVLK.K](#);

[R.FWADFIDKK.I](#);

[K.YEYREEDLR.N](#);

[K.SPFLPSDPYQR.A](#);

[K.SPLLLQMNPNVHK.K + Oxidation \(M\)](#);

[K.DKSPFLPSDPYQR.A](#);

[K.ESVSESVPDPEKVYEFVLVLK.K](#)

Calculated Mr: **25595**

Calculated pI: **5.48**

Probability Based Mowse Score:

Ions score is  $-10 \cdot \log(P)$ , where P is the probability that the observed match is a random event. Individual ions scores  $> 46$  indicate identity or extensive homology ( $p < 0.05$ ). Protein scores are derived from ions scores as a non-probabilistic basis for ranking protein hits.



Matched peptide sequences: shown in **Bold Red**:

```
1 MAEEVILLDF WSPSPFGMRVR IALAEKGVKY EYREEDLRNK SPLLLQMNPNV
51 HKKIPVLIHN GKPICESLIA VQYVDEVWKD KSPFLPSDPY QRAQARFWAD
101 FIDKKIYDIG RKIWTTKGDE QEAAKKEFIE ALKLELGE LG NKPYFGGESM
151 GYVDVALIPF YSWFYAYETC GNFSIEPECP VLIAWAKRCL QKESVSESVP
201 DPEKVYEFVL VLKKKFGIE
```

Spot No.: **D136 (S230)**

NCBI accession No.: [gi|2970051](#) Species: *Vigna radiata*

PFF score: **[104]**

Protein name: **ARG10**

Matched peptides No.: **[2]** Sequence coverage %: **[12]**

Matched sequences: [K.SANEVILVIEAYK.A](#);

[K.ITAVPAEEEEIIWGATFK.V](#)

Calculated Mr: **25750**

Calculated pI: **5.62**

Probability Based Mowse Score:

Ions score is  $-10 \cdot \log(P)$ , where P is the probability that the observed match is a random event. Individual ions scores  $> 46$  indicate identity or extensive homology ( $p < 0.05$ ). Protein scores are derived from ions scores as a non-probabilistic basis for ranking protein hits.



Matched peptide sequences: shown in **Bold Red**:

```
1  MLGIFSSSVV  SPPEELVAAG  SRTSPKTTA  GKLLTRFVES  KASAVSLQVG
51  EHVQLAYTHH  SESPWYPRSF  AVKDEIFCLF  EGALDNLGSL  RQQYGLAKSA
101 NEVILVIEAY  KALRDRAPYP  ANRVVCHLSG  SFAFIVFDKS  TSTVAVASDQ
151  AGKVPLYWGI  TADGYVAFAD  DADLLKGSCG  KSLASFPQGC  FYSTAVGGLR
201  CYENPKNKIT  AVPAEEEEIIW  GATFKVEGSA  VLAATEY
```

Spot No.: **D137 (S231)**

NCBI accession No.: [gi|2832430](#)

Species: *Hevea brasiliensis*

PFF score: **[217]**

Protein name: [prohevein](#)

Matched peptides No.: **[2]**

Sequence coverage %: **[20]**

Matched sequences: [R.IVDQCSNGGLDLVNVFR.Q](#);

[K.YGWTAFCGPVGAHGQPSCGK.C](#)

Calculated Mr: **20852**

Calculated pI: **5.64**

### Probability Based Mowse Score:

Ions score is  $-10 \cdot \log(P)$ , where P is the probability that the observed match is a random event. Individual ions scores  $> 45$  indicate identity or extensive homology ( $p < 0.05$ ). Protein scores are derived from ions scores as a non-probabilistic basis for ranking protein hits.

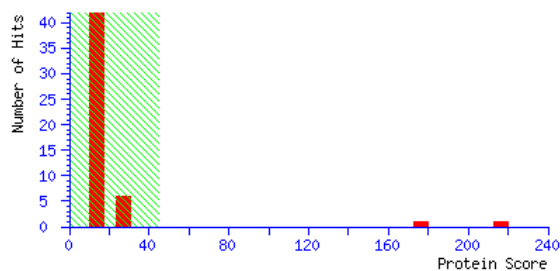

Matched peptide sequences: shown in **Bold Red**:

```
1  EQCGRQAGGK LCPNNLCCSQ WGWCGSTDEY CSPDHNCQSN CKDSGEGVGG
51  GSASNVLATY HLYNSQDHGW DLNAAAYCS TWDANKPYSW RSKYGWTAFC
101 GPVGAHGQPS CGKCLSVTNT GTGAKATVRI VDQCSNGGLD LDVNVFRQLD
151  TDGKGYERGH LTVNYQFVDC GDSFNPLFSV MKSSVIN
```

Spot No.: **D138 (S233)**

NCBI accession No.: [gi|14423933](#)

Species: *Hevea brasiliensis*

PFF score: **[384]**

Protein name: **Small rubber particle protein**

Matched peptides No.: **[5]**

Sequence coverage %: **[36]**

Matched sequences: [K.AEQYAVITWR.A](#);

[R.VSSYLPLLPEK.I](#);

[K.QVSAQTYVAQDAPR.I](#);

[K.DISGPLKPGVDTIENVVK.T](#);

[R.IVLDVASSVNTGVQEGAK.A](#)

Calculated Mr: **22331**

Calculated pI: **4.80**

Probability Based Mowse Score:

Ions score is  $-10 \cdot \log(P)$ , where P is the probability that the observed match is a random event. Individual ions scores  $> 45$  indicate identity or extensive homology ( $p < 0.05$ ). Protein scores are derived from ions scores as a non-probabilistic basis for ranking protein hits.



Matched peptide sequences: shown in **Bold Red**:

```
1 MAEEVEEERL KYLDFVRAAG VYAVDSFSTL YLYAKDISGP LKPGVDTIEN
51 VVKIVVTPVY YIPLEAVKfV DKtVDVSVtS LDGvVPPvIK QVSAQTYVA
101 QDAPRIVLDV ASSVNTGVQ EGAKALYANL EPKAEQYAVI TWRALNKLPL
151 VPQVANVVVP TAVYFSEKYN DVVRGtTEQg YRVSSYLPLL PTEKITKvFG
201 DEAS
```

Spot No.: **D139 (S234)**

NCBI accession No.: [gi|132270](#)

Species: *Hevea brasiliensis*

PFF score: **[379]**

Protein name: **Rubber elongation factor protein**

Matched peptides No.: **[4]**

Sequence coverage %: **[38]**

Matched sequences: [K.NVAVPLYNR.F](#);

[K.DASIQVVS AIR.A](#);

[K.FVDSTVVASVTI I DR.S](#);

[K.DKSGPLQPGVDI I EGPVK.N](#)

Calculated Mr: **14713**

Calculated pI: **5.04**

Probability Based Mowse Score:

Ions score is  $-10 \cdot \log(P)$ , where P is the probability that the observed match is a random event. Individual ions scores  $> 45$  indicate identity or extensive homology ( $p < 0.05$ ). Protein scores are derived from ions scores as a non-probabilistic basis for ranking protein hits.



Matched peptide sequences: shown in **Bold Red**:

```
1 MAEDEDNQGG QGEGLKYLGF VQDAATYAVT TFSNVYLFAK DKSGPLQPGV
51 DIIEGPVKNV AVPLYNRFSY IPNGALKFVD STVVASVTII DRSLPPIVKD
101 ASIQVVS AIR AAPEAARSLA SSLPGQTKIL AKVIFYGEN
```

Spot No.: **D140 (S238)**

NCBI accession No.: [gi|2832430](#)

Species: *Hevea brasiliensis*

PFF score: **[344]**

Protein name: [prohevein](#)

Matched peptides No.: **[3]**

Sequence coverage %: **[26]**

Matched sequences: [R.QLDTDGKGYER.G](#);

[R.IVDQCSNGGLDLVDNVFR.Q](#);

[K.YGWTAFCGPVGAHGQPSCGK.C](#)

Calculated Mr: **20852**

Calculated pI: **5.64**

### Probability Based Mowse Score:

Ions score is  $-10 \cdot \log(P)$ , where P is the probability that the observed match is a random event. Individual ions scores  $> 45$  indicate identity or extensive homology ( $p < 0.05$ ). Protein scores are derived from ions scores as a non-probabilistic basis for ranking protein hits.

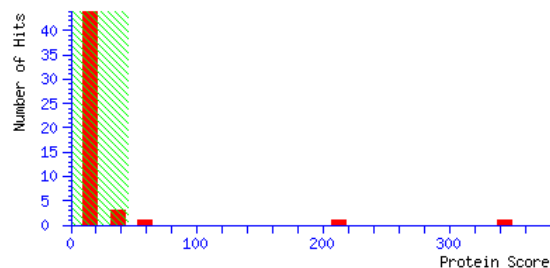

Matched peptide sequences: shown in **Bold Red**:

```
1  EQCGRQAGGK LCPNNLCCSQ  WGWCGSTDEY  CSPDHNCQSN  CKDSGEGVGG
51  GSASNVLATY HLYNSQDHGW  DLNAASAYCS  TWDANKPYSW  RSKYYGWTAFC
101 GPVGAHGQPS CGKCLSVTNT  GTGAKATVRI  VDQCSNGGLD  LDVNVFRQLD
151 TDGKGYERGH  LTVNYQFVDC  GDSFNPLFSV  MKSSVIN
```



Spot No.: **D141 (S247)**

NCBI accession No.: **gi|123062** Species: *Hevea brasiliensis*

**PFF** score: **[158]**

Protein name: **Pro-hevein**

Matched peptides No.: **[2]** Sequence coverage %: **[11]**

Matched sequences: **K.CLSVTNTGTGAK.T;**  
**R.QLDTDGKGYER.G**

Calculated Mr: **22700**

Calculated pI: **5.63**

### Probability Based Mowse Score:

Ions score is  $-10 \cdot \log(P)$ , where P is the probability that the observed match is a random event. Individual ions scores  $> 45$  indicate identity or extensive homology ( $p < 0.05$ ). Protein scores are derived from ions scores as a non-probabilistic basis for ranking protein hits.



Matched peptide sequences: shown in **Bold Red**:

```
1  MNIFIVVLLC  LTGVAIAEQC  GRQAGGKLCP  NNLCCSQWGW  CGSTDEYCSP
51  DHNCQSNCKD  SGEGVGGGSA  SNVLATYHLY  NSQDHGWDLN  AASAYCSTWD
101 ANKPYSWRSK  YGWTAFCGPV  GAHGQSSCGK  CLSVTNTGTG  AKTTVRIVDQ
151 CSNGGLDLDV  NVERQLDTDG  KGYERGHITV  NYQFVDCGDS  FNPLFSVMKS
201 SVIN
```

Spot No.: **D142 (S249)**

NCBI accession No.: **gi|132270** Species: *Hevea brasiliensis*

**PFF** score: **[405]**

Protein name: **Rubber elongation factor protein**

Matched peptides No.: **[4]** Sequence coverage %: **[38]**

Matched sequences: **K.NVAVPLYNR.F;**

**K.DASIQVVS AIR.A;**

**K.FVDSTVVASVTI DR.S;**

**K.DKSGPLQPGVDIIEGPVK.N**

Calculated Mr: **14713**

Calculated pI: **5.04**

Probability Based Mowse Score:

Ions score is  $-10 \cdot \log(P)$ , where P is the probability that the observed match is a random event. Individual ions scores  $> 46$  indicate identity or extensive homology ( $p < 0.05$ ). Protein scores are derived from ions scores as a non-probabilistic basis for ranking protein hits.

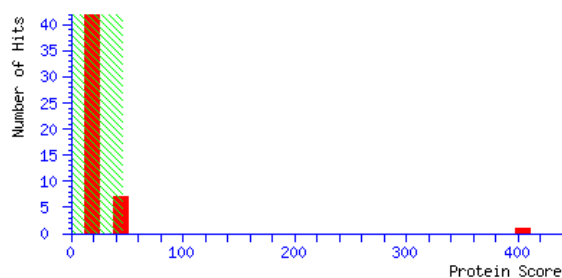

Matched peptide sequences: shown in **Bold Red**:

```
1 MAEDEDNQGG QEGELKYLGF VQDAATYAVT TFSNVYLF AK DKSGPLQPGV
51 DIIEGPVKNV AVPLYNRF SY IPNGALKFVD STVVASVTII DRSLPPIVKD
101 ASIQVVS AIR AAPEAARSLA SSLPGQTKIL AKVIFYGEN
```

Spot No.: **D143 (S251)**

NCBI accession No.: **gi|132270** Species: *Hevea brasiliensis*

**PFF** score: **[470]**

Protein name: **Rubber elongation factor protein**

Matched peptides No.: **[4]** Sequence coverage %: **[27]**

Matched sequences: **K.NVAVPLYNR.F;**

**K.DASIQVVS AIR.A;**

**K.SGPLQPGVDIIEGPVK.N;**

**K.DKSGPLQPGVDIIEGPVK.N**

Calculated Mr: **14713**

Calculated pI: **5.04**

Probability Based Mowse Score:

Ions score is  $-10 \cdot \log(P)$ , where P is the probability that the observed match is a random event. Individual ions scores  $> 46$  indicate identity or extensive homology ( $p < 0.05$ ). Protein scores are derived from ions scores as a non-probabilistic basis for ranking protein hits.

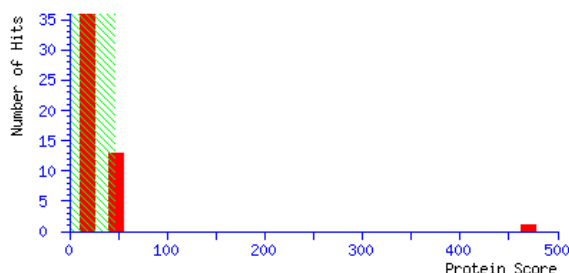

Matched peptide sequences: shown in **Bold Red**:

```
1 MAEDEDNQGG QGEGCLKYLGF VQDAATYAVI TFSNVYLFAK DKSGPLQPGV
51 DIIEGPVKNV AVPLYNRFSY IPNGALKFVD STVVASVTII DRSLPPIVKD
101 ASIQVVS AIR AAPEAARSLA SSLPGQTKIL AKVIFYGEN
```

## **Supplementary Figure S4**

### **Identification of ethylene responsive latex proteins by iTRAQ**

#### **1. Labeled samples:**

**117: E3TL (total latex)**

**116: E5TL**

**115: D3TL**

**114: D5TL**

**Needed values: 117: 115= E3TL: D3TL**

**116: 114= E5TL: D5TL**

**2.**

#### **14. Details of All Protein Summary for Rubber Latex \_iTRAQ 4 plex**

The 405 different proteins identified by ITRAQ.

## Protein No.: I-2

**Protein name and Species:**

**Beta-1,3-glucanase form 'RRII Gln 2' OS=Hevea brasiliensis**

**PE=3 SV=1**

**Accession: Tr|D1M8S7|D1M8S7\_HEVBR**

**Unused ProtScore: 66.5**

**Seq Cov %: 67.1**

**ITRAQ Changed Ratio:**

**117: 115=E3TL: D3TL=0.38**

**116: 114=E5TL: D5TL=0.57**

**Annotated typical Precursor MS Region:**

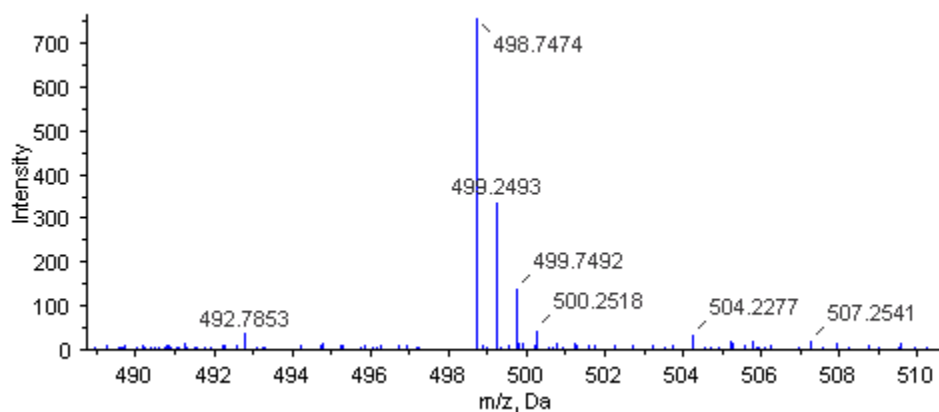

Sequence Coverage and Matched peptides: in different color

MAICSSTSGTSSSLPSRTTVMLLLFFFTASVGIITDAQVGVGYGMQGNLPPVSEVIALYKKSNIITRMRI  
YDPNQAVLEALRGSNIELILGVPNSDLQSLTNPSNAKSWVQKNVRGFWSSVRFRIYIAGNEISPVNRGT  
AWLAQFVLPAMRNIHDAIRSAGLQDQIKVSTAILDLTLVGN SYPPSAGAFRDDVRSYLNPIIRFLSSIRS  
PLLANIYPYFTYAGNPRDISLPYALFTSPSVVWDGQRGYKNLFDATLDALYSALERASGGSEVWVSE  
SGWPSAGAF AATFDNGR TYLSNLIQHVKRGTPKRPKRAIET YLFAMFDENK KQPEVEK HFGLFFPNK WQ  
KYNLNFSAEKNWDISTEHNATILFLKSDM

# Protein No.: I-5

**Protein name and Species:**

**Major latex allergen Hev b 5 OS=Hevea brasiliensis PE=1 SV=3**

**Accession:**

**sp|Q39967|ALL5\_HEVBR**

**Unused ProtScore: 58.21**

**Seq Cov %: 95.4**

**ITRAQ Changed Ratio:**

**117: 115=E3TL: D3TL=3.25**

**116: 114=E5TL: D5TL=1.54**

**Annotated typical Precursor MS Region:**

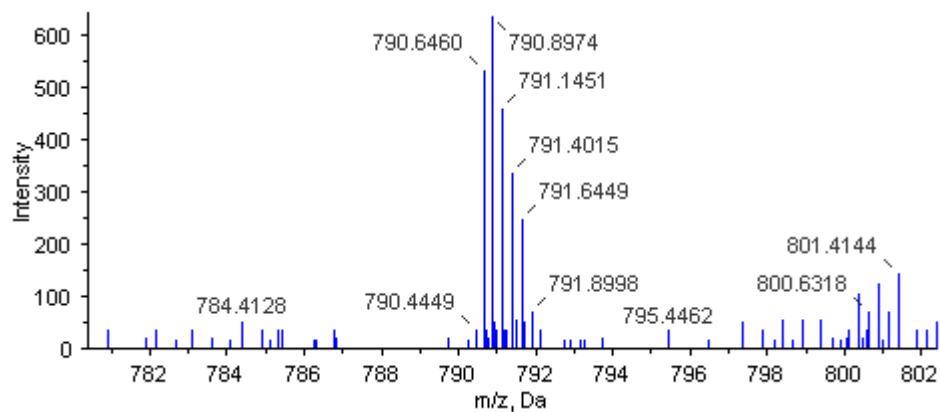

## Sequence Coverage and Matched peptides: in different color

MASVEVESAAALPKNETPEVTKAEETKTEEPAAPPASEQETADATPEKEEPTAAPAEPEAPAPETEKAE  
EEVEKIEKTEEPAPEADQTTPEEKPAEPEPVAAEEPKHETKETETEAPAAPAEGEKPAEEKPI TEAAE  
TATTEVPVEKTEE



# Protein No.: I-7

**Protein name and Species:**

**Latex allergen hev b 7.02 (Fragment) OS=Hevea brasiliensis**

**PE=2 SV=1**

**Accession: tr|Q706V4|Q706V4\_HEVBR**

**Unused ProtScore: 54.77**

**Seq Cov %: 71.6**

**ITRAQ Changed Ratio:**

**117: 115=E3TL: D3TL=0.33**

**116: 114=E5TL: D5TL=0.30**

**Annotated typical Precursor MS Region:**

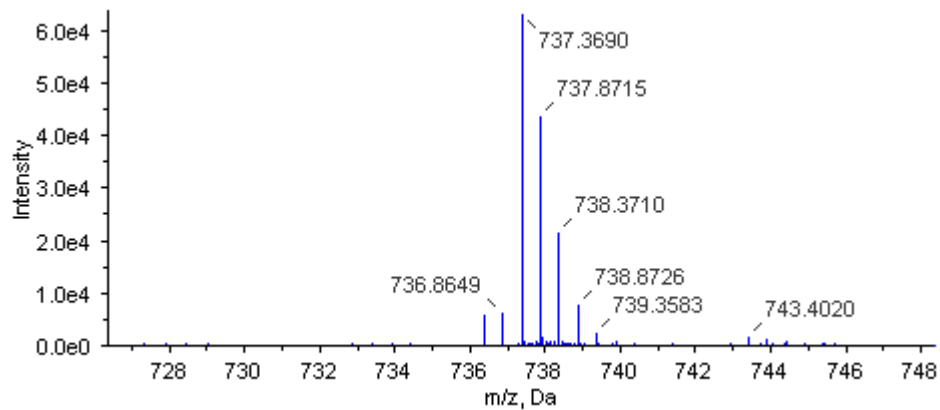

## Sequence Coverage and Matched peptides: in different color

ATGSTTLTQGKKITVLSIDGGGIRGIIPGIILASLESKLQDL DGP DARIADYFDIIAGTSTGGLITTML  
TAPNEDKKPMYQAKDIKDFYLENCPKIFPKESRDNYDPIHSIGPIYDGEYLRELCNNLLKDLTVKDTLT  
DVIIPTFDIKLLL PVIFSSDDAKCNALKNARLADVCISTSAAPVLLPAHSFTTEDDKNIHTFELIDGGV  
AATNPTLLALTHIRNEIIRQNPRFIGANL TESKSRVLVLSLGTGKSEYKEKYNADMTSKWRLYNWALYNG  
NSPAVDIFSNASSDMVDFHLSALFKSLDCEDYYLRIQDDTLTGEESGHIATEENLQRLVEIGTRLLEK  
QESRINLDTGRLESIPGASTNEAAITKFAKLLSEERKLRQLK

## Protein No.: I-10

**Protein name and Species:**

**Actin OS=Morus alba PE=3 SV=2**

**Accession:**

**tr|E5FR85|E5FR85\_MORAL**

**Unused ProtScore: 44.55**

**Seq Cov %: 56.2**

**ITRAQ Changed Ratio:**

**117: 115=E3TL: D3TL=0.39**

**116: 114=E5TL: D5TL=0.75**

**Annotated typical Precursor MS Region:**

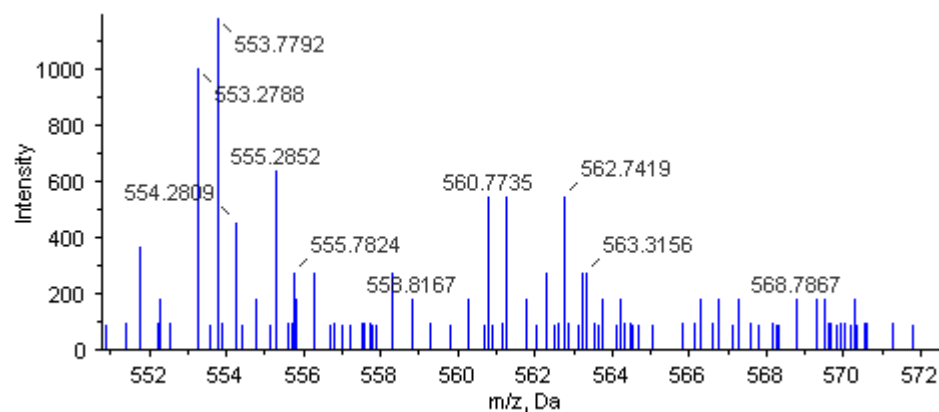

## Sequence Coverage and Matched peptides: in different color

MADAEDIQPLVCDN**GTGMVKAGFAGDDAPRAVFP**SI**VG**RP**RHTGVMVGMGQ**DAY**VGDEAQS**K**RGILTL**  
**KYPIEHGIVSNWDDMEK**I**WHHTFYNELRVAPEEHPVLLTEAPLNPK**ANREKMTQIMFETFNVPAMYVAI  
QAVLSLYASGR**TTGIVLDSGDGVSH**TVPIYEGYALPHAILR**LDLAGRDLTDALMKILTERGYMFTTTAE**  
**REIVRDMKGKLAYVALDYEQELETAK**SGSSVEK**NYELPDGQVITIGAERYR**CPQVLFQPSLIGMEAAGI  
HETTYNSIMK**CDVDIRKDLYGNIVLSGGSTMFP**GIAD**MSKEITALAPSSMKIKVAPPERK**YSVWIGG  
SILASLSTFQQMWISK**GEYDESGPSIVHR**KCF

# Protein No.: I-11

**Protein name and Species:**

**Heat shock protein OS=Hevea brasiliensis PE=2 SV=1**

**Accession: [tr|Q71EE1|Q71EE1\\_HEVBR](#)**

**Unused ProtScore: 43.62**

**Seq Cov %: 38.3**

**ITRAQ Changed Ratio:**

**117: 115=E3TL: D3TL=1.58**

**116: 114=E5TL: D5TL=1.42**

**Annotated typical Precursor MS Region:**

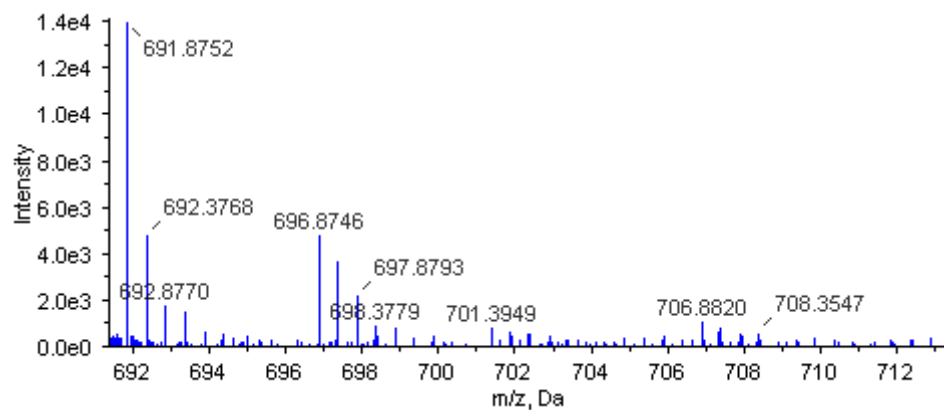

## Sequence Coverage and Matched peptides: in different color

MADAETFAFQAEINQLLSLIINTFYSNK**EIFLR****EIISNASDALDKIR****FESLTDK****SKLDAQPEL****FIRLVP**  
**DKANK****TL****SI****IDS****GIGMTKADLVN****LG****TIAR**SGTKEFMEALQAGADVSMIGQFGVGFYSAYLVAEKVIVT  
TKHNDDEQYIWESQAGGSFTVTRDVNGDQLGRGTK**ITLFLKEDQLEYLEER****RIKDLVKKHSEFISYPIY**  
LWTEKTTEKEISDDEDEPKKEEEGD**VEDVDEEK**ETKSKKKKIKEVSHWQLINK**QKPIWLR**KPEEITK  
**EEYASFYK**SLTNDWEDHLAVKHFSVEGQLEFK**AILFVPK****RAPFDLFDTRKK**MSNIKLYVRR**VFIMDNCE**  
**ELIPEYLG****FVKG****VVDS****DDLPLNISR**EMLQQNKILKVIRKNLVKK**CIEMFNEIAENK**EDYNK**FYEAFSKN**  
LKLGIHEDSQNR**AKLADLLR****YHSTK****SGDEMTSLKDYVTR**MK**EGQK**DIYYITGESK**KAVENSPFLER**LKK  
KGYEVLFMVDAID~~EYAVG~~**QLKEYD****GKKLV****SATKEGLK****LDDETEEEK**KKKKEEKK**SFENLCKTIK****DILGD**  
**KVEKVVVSDR****IVDSPCCLVTGEYGWTANMER**IMKAQALRDSSMSSYMSSK**KTMEINPDNVIVEELR**KRA  
EADKNDKSVKDLVLLLFETALLTSGFSLDDPNTFSARIHRMLK**LGLSIDDETAGDDADMPALEEDGAE**  
**ESKMEEVD**

## Protein No.: I-12

**Protein name and Species:**

**50 kDa protein; Major latex allergen Hev b 4 OS=Hevea  
brasiliensis PE=2 SV=1**

**Accession: tr|Q5VLJ6|Q5VLJ6\_HEVBR**

**Unused ProtScore: 42.03**

**Seq Cov %: 35.4**

**ITRAQ Changed Ratio:**

**117: 115=E3TL: D3TL=0.46**

**116: 114=E5TL: D5TL=0.56**

**Annotated typical Precursor MS Region:**

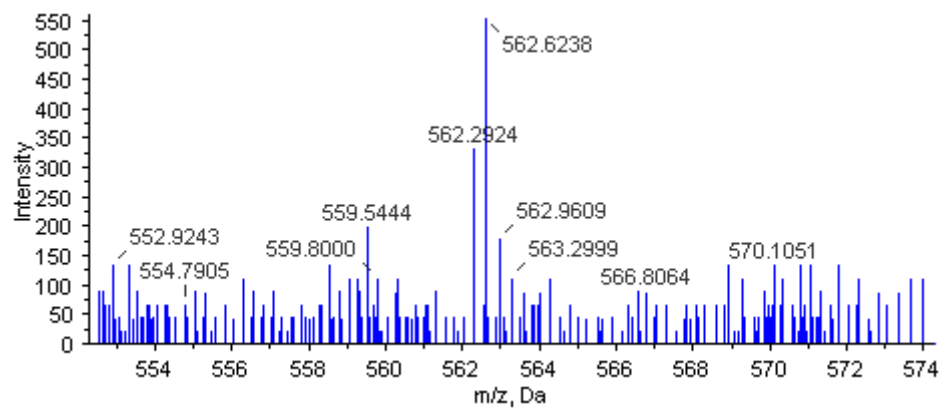

## Sequence Coverage and Matched peptides: in different color

MAGKGEPAIGIDLGTTYSCVGVWQHDRV**VEIIANDQGNRTTPSYVGF**TDTER**LIGDAAKNQVAMNP**INT  
**VFDAKRLIGR****RFTDASVQSDIK**LWPFKVFSGPGDKPMIQVNYKGEDK**QFSAEEISSMVL**MK**MR**EIAEAY  
**LGTTVKN**AVVTV**PAYFNDSQR**QATK**DAGVIAGL**NVMRI**INEPTAAAIAYGLD**KKATSVGEKNVLI**FDLG**  
GGTFDVSLLTIEEGIFEVK**ATAGDTHLGGEDFDNRMVNH**FV**QEFK**RKNK**KDISGNPRALRR**LRTACERA  
KRTLSSSTAQTTIEIDSLYEGIDFYSTITR**ARFEELNMDLFR**K**CMEPVEK**CLRDAKMDKR**TVHDVVLVGG**  
**STR**IPK**VQQLLQDF**FNGKELCK**SINPDEAVAYGAAVQAAIL**SGEGNEK**VQDLLLLDVTPL**SLG**LETAGG**  
**VMTVLIPRNTTIP**TK**EQVFSTYSDNQPGVLIQVY**EGERT**TRTRDNNLLGK**FELSGIPPAPRGVPQITVC  
FDIDANGILNVSAEDKTTGQKNK**ITITNDKGR**LSKEEIEKM**VQEA**EKYKSEDEEHKKKVEAK**NALENYA**  
**YNMRNTVKDEK**IGGKLDPADKKKIEDAVEQTIQWLDSNQLGEADEFEDK**MKELESICNPIIAK**MYQ**GGA**  
GPD**MGGG**MDDV**PAGGS**GAGPKIEEVD



## Protein No.: I-13

**Protein name and Species:**

**Acetyl-CoA C-acetyltransferase OS=Hevea brasiliensis**

**GN=HbAACT PE=2 SV=1**

**Accession: [tr|A9ZMZ4|A9ZMZ4\\_HEVBR](#)**

**Unused ProtScore: 41.88**

**Seq Cov %: 76**

**ITRAQ Changed Ratio:**

**117: 115=E3TL: D3TL=0.65**

**116: 114=E5TL: D5TL=0.45**

**Annotated typical Precursor MS Region:**

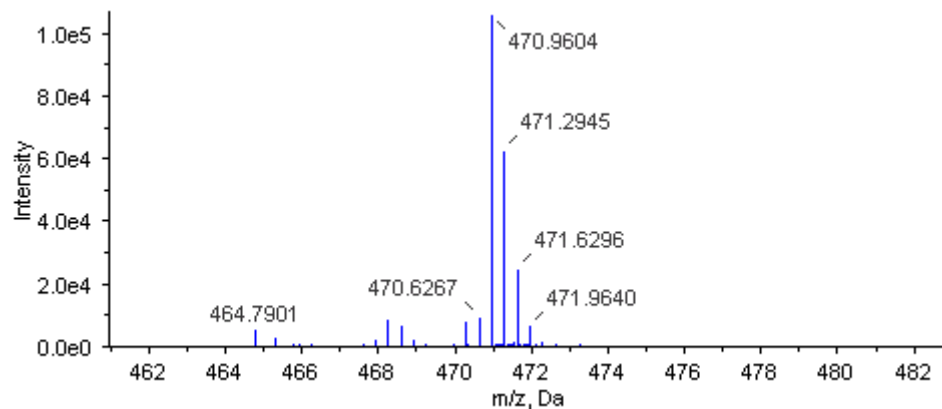

## Sequence Coverage and Matched peptides: in different color

MAPVAAAEIKPRDVCIVGVARTPMGGFLGLLSTLPATKLGSIIEAALKRASVDPSLVQEVEFFGNVLSA  
NLGQAPARQAALGAGIPNSVVCTTVNKVCASGMKATMLAAQSIQLGINDVVVAGGMESMSNAPKYLAEA  
RKGSR LGHDSLVDGMLKDGLWDVYNDVGMGSCAEICADNHSITREDQDKFAIHSFERGIAAQESGAFW  
EIVPVEVSGGRGKPLTIVDKDEGLGKFDPVKLRKLRPSFKENGGTVTASNASSISDGAALILVSGETA  
LKLGLQVIAKIRGYADAAQAPELFTTAPALAIPTIANAGLDASQVDYIEINEAFVVALANQKLLGLN  
PEKVN VHGGAVSLGHPLGCSGARILVTL LGVLRKKNAYGVGGVCNNGGGASALVVELL

## Protein No.: I-15

**Protein name and Species:**

**Enolase 1 OS=Hevea brasiliensis GN=ENO1 PE=1 SV=1**

**Accession: [sp|Q9LEJ0|ENO1\\_HEVBR](#)**

**Unused ProtScore: 39.75**

**Seq Cov %: 45.2**

**ITRAQ Changed Ratio:**

**117: 115=E3TL: D3TL=0.30**

**116: 114=E5TL: D5TL=0.37**

**Annotated typical Precursor MS Region:**

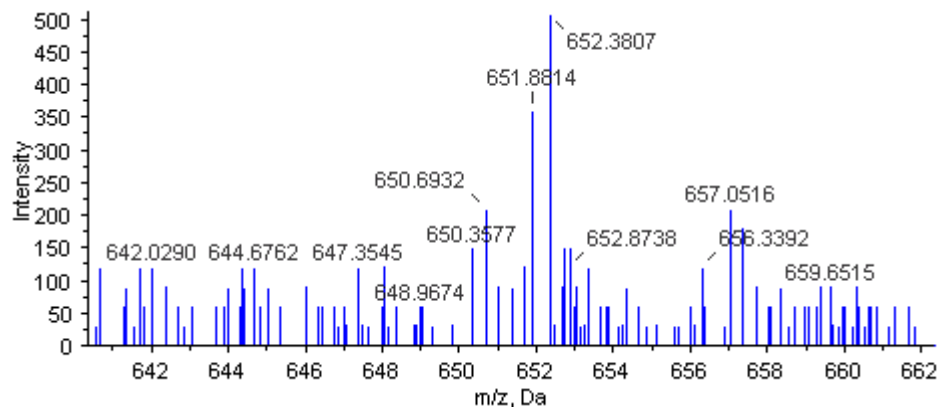

## Sequence Coverage and Matched peptides: in different color

MAITIVSVRARQIFDSRGNPTVEADVKLSDGYLARAAVPSGASTGIYEALELRDGGSDYLKGVSKAVE  
NVNIIIGPALVGKDPDQVGDIDNFMVQQLDGTVNEWGWCKQKLGANA ILAVSLAVCKAGAHVKGIPLYE  
HIANLAGNKNLVLVPAFNVINGGSHAGNKLAMQEFMILPVGASSFK EAMKMGAEVYHHLKSVIKK KYG  
QDATNVGDEGGFAPNIQENKEGLELLKTAIAKAGYTGKVVIGMDVAASEFYGSDQTYDLNFK EENNNGS  
QKISGEALKDLYKSFVAEYPIVSIEDPFDQDDWAHYAKLTSEIGEKVQIVGDDLLVTNPKRVEKAIKEK  
ACNALLKVNQIGSVTESIEAVKMSKRAGWGMASHRSGETEDTFIADLSVGLATGQIKTGAPCRSERL  
AKYNQLLRIEEELGSEAVYAGANFRKPVEPY

## **Protein No.: I-17**

**Protein name and Species:**

**Latex-abundant protein; caspase; type II metacaspase [Hevea brasiliensis] OS=Hevea brasiliensis GN=LAR PE=2 SV=1**

**Accession: [tr|Q9ZSP8|Q9ZSP8\\_HEVBR](#)**

**Unused ProtScore: 37.25**

**Seq Cov %: 65.5**

**ITRAQ Changed Ratio:**

**117: 115=E3TL: D3TL=0.52**

**116: 114=E5TL: D5TL=0.30**

**Annotated typical Precursor MS Region:**

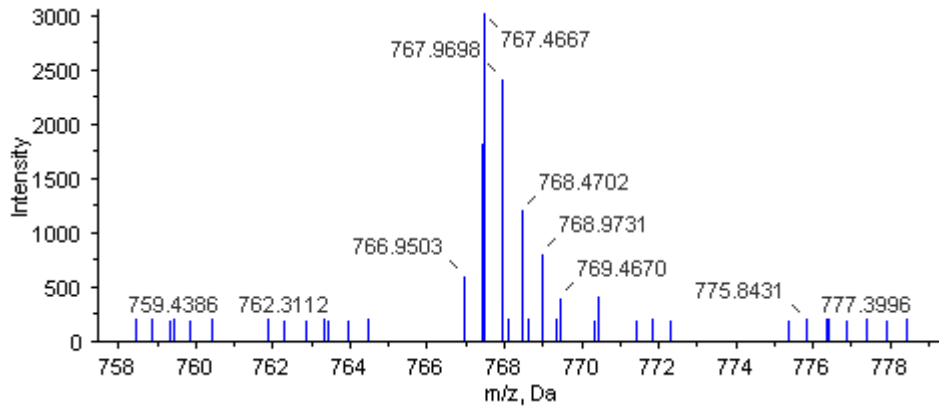

### Sequence Coverage and Matched peptides: in different color

MAKKAVLIGINYPGTKAELKGCINDVKRMYRCLVDRYGFSEEDITVLIDIDESYIQPTGKNIRRVLTDL  
 VRS AEPGDL L FVHYSGHGTRLPAETGEDDDTGDFDECIVPCDMNLITDDDFREFVDQVPHGCRITVVS  
 CHSGGLIDEAKEQIGESTKRKEESESSESGFGFKSFLKQTIQDAFESRGVHLPSDLHHHHGHRDEEDFDNR  
 VVEEDYGDSGYVKSLSLPLSTLIEILKQKTKGDDIDVVKLRPTLFDMFGDDASPKVKKFMKVILNKLRLH  
 GDGESGGGGFLGMVGS LAQEF LKHKL DENDES YVKPALETEVDSKQEVYAGKTKRSLPDGGILISGCQT  
 DQTSADASPSGKSSEAYGALSNAIQTIIAETDGAVTNQELVLKARKMLKKQGF TQK PGLYCSDDHVEAS  
 FVC

## Protein No.: I-18

**Protein name and Species:**

**Mevalonate disphosphate decarboxylase OS=Hevea brasiliensis**

**PE=2 SV=1**

**Accession: [tr|Q944G0|Q944G0\\_HEVBR](#)**

**Unused ProtScore: 34.69**

**Seq Cov %: 43.4**

**ITRAQ Changed Ratio:**

**117: 115=E3TL: D3TL=0.49**

**116: 114=E5TL: D5TL=0.35**

**Annotated typical Precursor MS Region:**

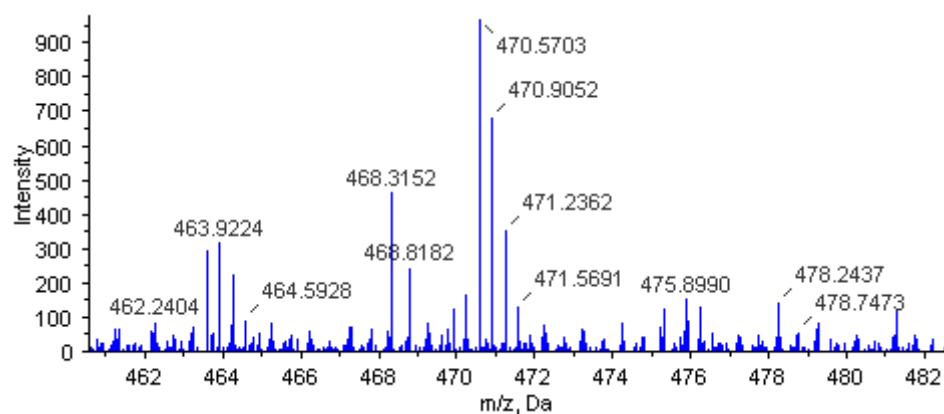

## Sequence Coverage and Matched peptides: in different color

MAESWVIMVTAQTPNIAVIK YWGKRDEKLILPVNDSISVTLDPAHLCTTTTVAVSPSFAQDRMWLNGK  
EISLSGGRYQNCLR EIRARACDVEDKERGIKISKDWEKLYVHIASYNFPPTAAGLASSAAGFACLVFA  
LAKLMNAKEDNSELSAIARQSGSACRSLFGGFVKWKMGKVEDGSDSLAVQVVEKHWDDLVI I IAVVS  
SRQKETSSTTGMR ETVETSLLLQHR AKEIVPKRIVQMEESIKNRNFASF AHLTCADSNQFHAVCMDTCP  
PIFYMNDTSHRIISCVEK WNR SVGTPQVAYTFDAGPNAVLIAHNRKAAAQLLQKLLFYFPPNSDTELNS  
YVLGDKSILKDAGIEDLKDVEALPPPPEIKDAPRYKGDVSYFICTRPGQGPVLLSDESQALLSPETGLP  
K



## Protein No.: I-19

**Protein name and Species:**

glyceraldehyde-3-phosphate dehydrogenase, NADP-dependent

OS=Pisum sativum GN=GAPN PE=1 SV=1

**Accession:** [sp|P81406|GAPN\\_PEA](#)

**Unused ProtScore:** 32.73

**Seq Cov %:** 46.6

**ITRAQ Changed Ratio:**

**117: 115=E3TL: D3TL=0.50**

**116: 114=E5TL: D5TL=0.77**

**Annotated typical Precursor MS Region:**

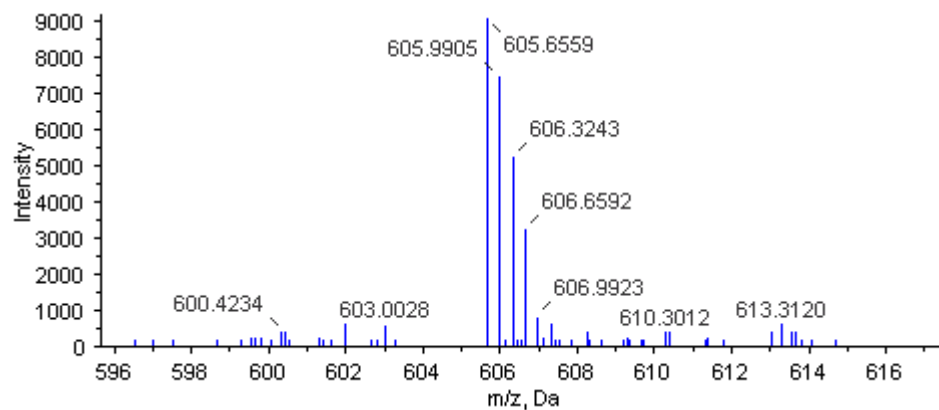

## Sequence Coverage and Matched peptides: in different color

MAATGVLAEEIIDGDVYKYYADGEWKK**STSGKSVAILNPTR**KPQYK**VQACSQEEVNK**VMDSAKSAQKSW  
AKTPLWK**RAELLHKAAAILK**EHK**AAIAECLVKEIAKPAKDAVTEVVR**SGDLVSYCAEEGVR**ILGEGKFL**  
**VSDSFPGNER**TKYCLTSK**IPLGVILAIPPFNYPVNLAVSK**IAPALIAGNSIVLKPPTQGAVAALHMVHC  
FHLAGFPK**GLISCVTGKGSEIGDFLTMHPGVNCISFTGGDTGIAISK**SGMIPLQ**MELGGKD**ACIVLED  
**ADLDLVAANI**IKGGFSYS**SGQR**CTAVK**VVLVMESVADALVEK**VKVKVAKLSVGPPEDSDITPVVSESSA  
NFIEGLVND**AK****EKGATFCQ**EYKR**EGNLIWPLLLDNVRPDMR****I**AWE**EPFGPVL**PVIRINS**VEEGIHHCNA**  
**SNFGLQGC**VFTK**D**INKAIMISDAMES**GT**Q**INSAPAR**GPDH**FPFQGIKDSGIGS**QGITNS**INMMTK**VKT  
TVINL**PSPSYTMG**

## Protein No.: I-22

**Protein name and Species:**

**Hydroxymethylglutaryl coenzyme A synthase OS=Hevea  
brasiliensis PE=2 SV=1**

**Accession: tr|Q944F8|Q944F8\_HEVBR**

**Unused ProtScore: 31.1**

**Seq Cov %: 42.7**

**ITRAQ Changed Ratio:**

**117: 115=E3TL: D3TL=0.19**

**116: 114=E5TL: D5TL=0.44**

**Annotated typical Precursor MS Region:**

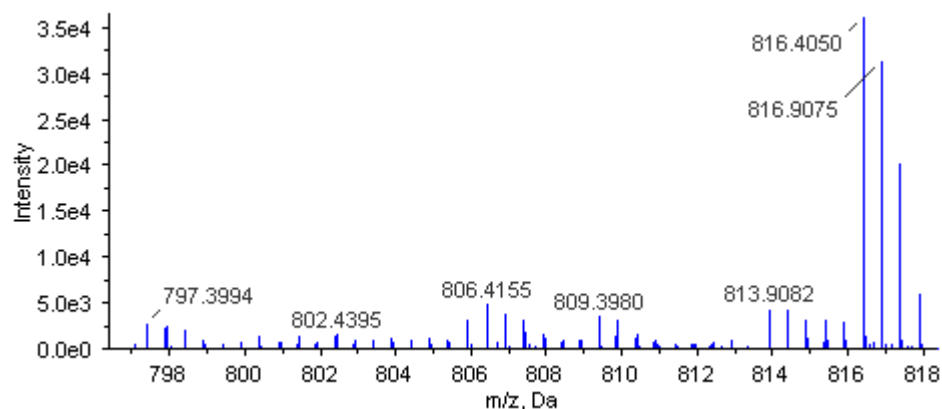

## Sequence Coverage and Matched peptides: in different color

MAKNVGI~~LAVDIYFPPTFVQQEAL~~EAH**DGASK**GKYTI~~GLGQDCMAFCTEVEDVISMSLTAVT~~SLLDK**YN**  
**IDPK**QIGR**LEVGETVIDK**SK**SIK****TFLMQIFEK**FGNTDIEGVDSTNACYGGTAALFNCVNWVESSWDG  
RYGLVVCTDSAVYAEGPARPTGGAAAIAILVGPDAPIAFESKFRGSHMSHAYDFYK**PNLASEYPVVDGK**  
**LSQTCYLMALDSCYK**H**CAK**YEKFEKGQFSISDAEYFVFHSPYNKLVQKSFAR**LVFNDFVRNASSIDET**  
**AKEKLAPFSNLSGDESYQNRDLEKVSQQVAKPLYDAKVKPTTLIPK**QVGNMYTASLYAAFASLLHSK**HT**  
**ELAGKRVTLFSYGSGLTATMFSLR**L**HEGQHPF**SLSNIASVMNVAGK**LKAR****HELPPEKFVDIMK**LMEHRY  
GAK**DFVTSKDCSLLASGTYYLTEVDSL**YR**RFYAQK**AVGNTVENGLLANGH

## Protein No.: I-23

**Protein name and Species:**

**Methyl transferase;**

**5-methyltetrahydropteroyltriglutamate-homocysteine**

**methyltransferase, putative OS=Ricinus communis**

**GN=RCOM\_1321820 PE=3 SV=1**

**Accession: tr|B9SI90|B9SI90\_RICCO**

**Unused ProtScore: 30.18**

**Seq Cov %: 25.5**

**ITRAQ Changed Ratio:**

**117: 115=E3TL: D3TL=2.17**

**116: 114=E5TL: D5TL=1.57**

**Annotated typical Precursor MS Region:**

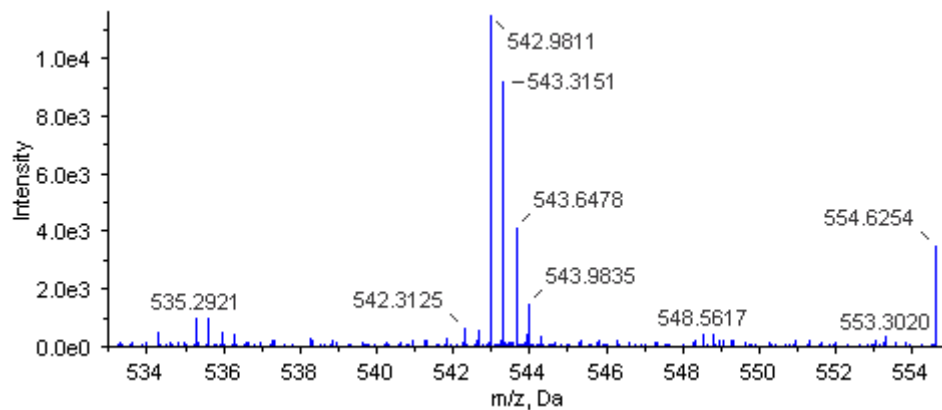

## Sequence Coverage and Matched peptides: in different color

MASHIVGYPRMGPKRELKFALESFWDGKSSAQDLEKVASDLRESIWKQMAAAGIKHIPSNTFSSYYDQVL  
DTTAMLGAVPPRYGWNNGEIGFDTYFSMARGNASVPAMEMTKWFDNTNYHFIVPELGPDVNF~~SYASHK~~AV  
TEYKEAKAHGVDTVPVVLVGPVSYLLLSKPAKGVVEKTF~~SLLSLLGKILPVYKEVISELKAAGASWIQFDE~~  
PTLVLDLDSHKLQAF~~TDAYSELESTLSGLNVLIETYFADIPAEAFKTLTSLKGV~~TAYGF~~DLVR~~GTK~~TLD~~  
~~LIK~~SEFPKGGK~~YLFAGVVDGR~~NIWANDLAASLTILHELEGIVGDKLVVSTSSSLHTAVDLVNETKLDK  
ELK~~SWLAFAAQKIVEVNALAKALAGEKDEAFFSANAAAQASR~~KSSPRVTNEAVQKAAAAALKGSDHRRAT  
NVSARLDAQQK~~KLNLPILP~~TTTTIGSF~~PQTIELR~~RVRREYKAKKVSEDDYVKAIKEEISKVVKLQEELDI  
DVLVHGEPERNMVEYFGEQLSGFAFTVNGWVQSYGSR~~CVKPP~~IIYGDVSRPNPMTVFWSSTAQSMTAR  
PMK~~GMLTGPVTILNWSFVR~~NDQPRFETCYQIALAIKDE~~VEDLEK~~AGINVIQIDEAALREGLPLRKSEQA  
FYLDWAVHSFRITNVGVQDTTQIHTHMCYSNFNDIHSIIDMDADVITIENSRSDEK~~LLSVFR~~EGVK~~YG~~  
~~AGIGPGVYDIHSPRIPSTEEIADR~~INKMLAVLEM~~NILWVNPDCGLK~~TRK~~YSEVKPALS~~NMVAAAKLLRT  
QLASAK

# Protein No.: I-24

**Protein name and Species:**

**ATP-citrate synthase, putative OS=Ricinus communis**

**GN=RCOM\_1000580 PE=4 SV=1**

**Accession: tr|B9RZR0|B9RZR0\_RICCO**

**Unused ProtScore: 30.15**

**Seq Cov %: 42**

**ITRAQ Changed Ratio:**

**117: 115=E3TL: D3TL=0.31**

**116: 114=E5TL: D5TL=0.59**

**Annotated typical Precursor MS Region:**

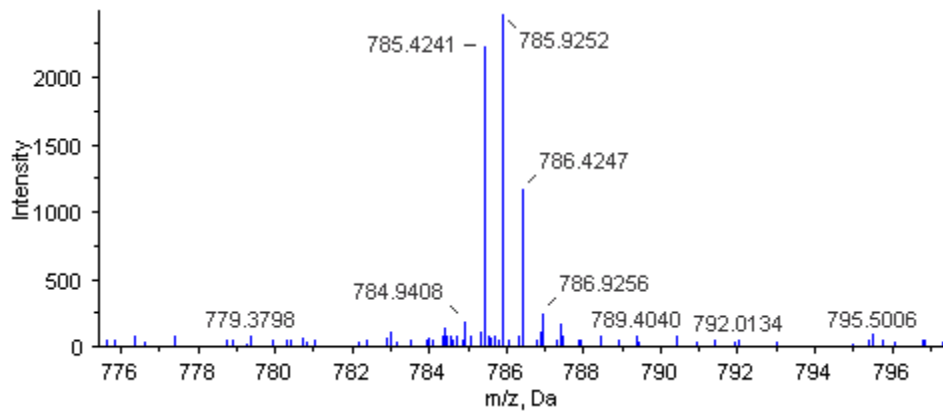

**Sequence Coverage and Matched peptides: in different color**

MATGQLFSR**TTQALFYNYKQLPIQRMLDFDFLCGRETPSVAGIINPGSEGFQK**LFFGQEEIAIPVHSAI  
EAACAAHPTADVFINFASFR**SAAASSMAALKQPTIRVVAIIAEGVPESDTKQLIAYAR**ANNK**VVIGPAT**  
**VGGIQAGAFKIGDTAGTIDNIIACKLYRPGSVGFVSKSGGMSNELYNTIAR**VTDGIYEGIAIGGDVFPG  
STLSDHVLRR**FNNIPQVKMIVVLGELGGRDEYSLVEALKQGKVNKPVVAWVSGTCARL**FK**SEVQFGHAGA**  
**KSGGEMESAQAKNQALKDAGAVVPTS YEAFETAIK**ETFQKLVEEGKITPVK**EVKPPQIPEDLNTAIK**SG  
KVR**APTHIISTISDDRGE**EP**CYAGVPM**SSIVEQGYGVDVISLLWFKRSLPRYCTHFIEICIMLCADHG  
PCVSGAHNTIVTARAGK**DLVSSLVSGLLTIGPRF**GG**AIDDAAR**YFKDAYDR**GLAPYEFVESMK**KKGIRV  
PGIGHRIKRGDNRDK**RVELLQR**F**ARTHFP**SVK**YMEYAVEVETYTL**SKANNLVLNVDGAIGSLFLDLLAG  
SGMFTKQEIDEIVEIGYLNGLFVLARSIGLIGNRSE

## Protein No.: I-25

Protein name and Species:

Phosphofructokinase, putative OS=Ricinus communis

GN=RCOM\_1602260 PE=4 SV=1

Accession: tr|B9R8U5|B9R8U5\_RICCO

Unused ProtScore: 29.94

Seq Cov %: 42.5

ITRAQ Changed Ratio:

117: 115=E3TL: D3TL=0.34

116: 114=E5TL: D5TL=0.36

Annotated typical Precursor MS Region:

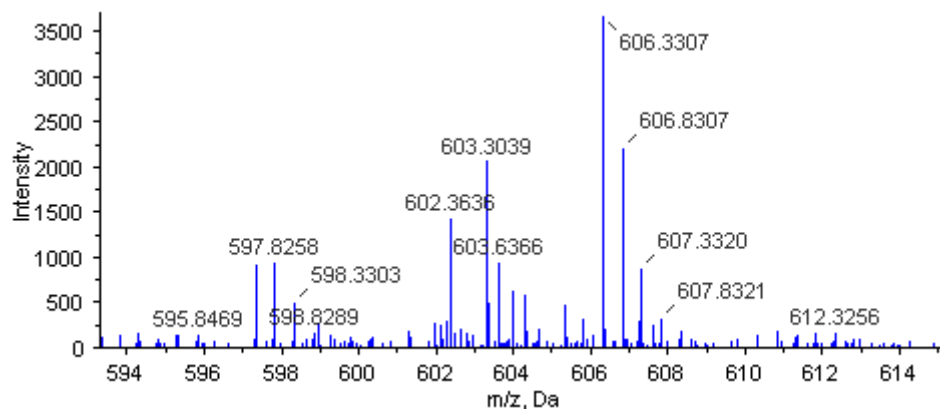

Sequence Coverage and Matched peptides: in different color

MDSDFGIPRELSDDLQKLRSLYQPELPPCLQGTTVRVELGDGTTAADEAGAHTISRSPHPTYGQPLAHFL  
RATAKVADAHIISEHPAMRVGVVFCGRQSPGGHNVVWGLHNAKLIHNPNSTLLGFLGGSEGLFAQKMLE  
VTDDILSTYKNQGGYDLLGRTKDQIRTEQVHAALTTCKNLKLDGLVIIGVTSNTDAAQLAETFAEAK  
CPTKVVGVVPTLNGDLKNQFVETNVGFDTICKVNSQLISNVCTDALSAEKYYYFIRLMGRKASHVALEC  
TLQSHPNMVILGEEVAASKLTLFDLTKQVCDAVQARAEQDKYHGVILLPEGLIESIPEVYALLKEIHGL  
LRQGVSPNNISSQLSPWASALFEFLPPFIKKQLLLYPESDDSAQLSQIETEKLLAHLVEAEMNKRLKEG  
TYKGKKFNAICHFFGYQARGSLPSKFDYAYVLGHICYHVLAAGLNGYMATATNLKNPVNKWRCGAAP  
IAAMMTVKRWAQNPGATSIGKPAIHAAVDLKGKAYELLRLNAVKFLMDDLRYRNPGLQFEGPGADAKP  
ITLCVEDQDYMGRIKKLQEYLDKVRITIVKPGCSQEVLKAAALSVMASVTDVLLTMSSTSLDGQRPL



## Protein No.: I-27

Protein name and Species:

14-3-3 protein 2 OS=Hevea brasiliensis PE=2 SV=1

Accession: [tr|F2YZ43|F2YZ43\\_HEVBR](#)

Unused ProtScore: 27.55

Seq Cov %: 51.5

ITRAQ Changed Ratio:

117: 115=E3TL: D3TL=0.53

116: 114=E5TL: D5TL=0.86

Annotated typical Precursor MS Region:

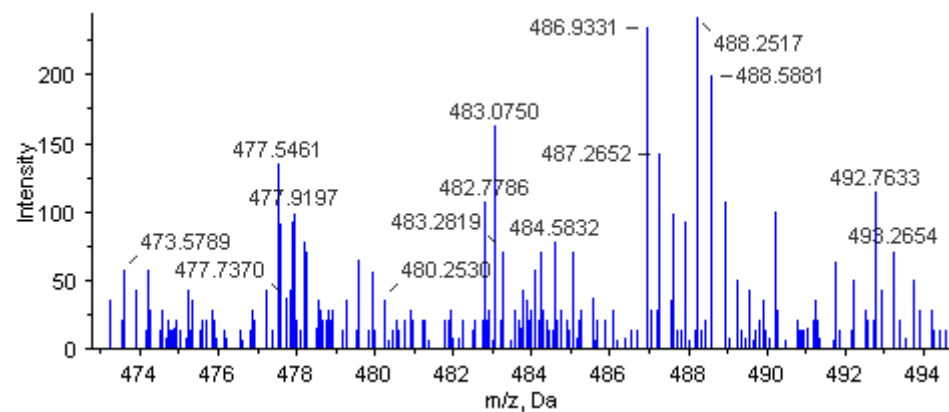

Sequence Coverage and Matched peptides: in different color

MSPT~~ESSR~~EENVYMAKLAEQAERYEEMVEFMEKVAKTVDVEELTVEERNLLSVAYKNVIGARRASWR~~II~~  
SSIEQKEESRGNEDHVTIIKEYR~~GKIESEL~~SKICDGI~~LSL~~LESHLIPSASSA~~ESK~~VFYLKMKGDYHRYL  
AEFKTAGERKEAAESTLLAYKSAQDIALADLAPTHPIRLGLALNFSVFYYEILNSPDRACNLAKQAFDE  
AISELDTLGEESYKDSTLIMQLLRDNLTLWTS~~DIT~~DEAGDEIK~~EASK~~RESGEGQPQQ

## Protein No.: I-28

**Protein name and Species:**

**RAB2A OS=Lotus japonicus GN=rab2A PE=2 SV=1**

**Accession: tr|Q40208|Q40208\_LOTJA**

**Unused ProtScore: 27.3**

**Seq Cov %: 65.4**

**ITRAQ Changed Ratio:**

**117: 115=E3TL: D3TL=0.38**

**116: 114=E5TL: D5TL=0.39**

**Annotated typical Precursor MS Region:**

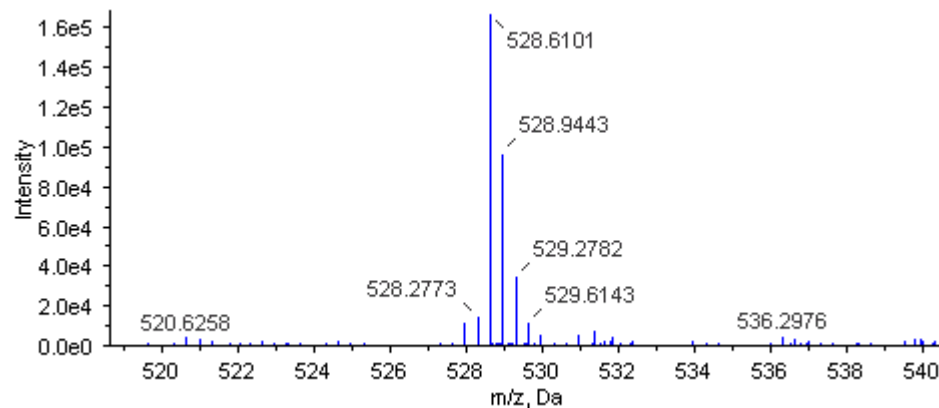

**Sequence Coverage and Matched peptides: in different color**

MSYAYLFKYIIIGDTGVGKSCLLLQFTDKRFQPVHDLTI GVEFGARMITIDNKP IKLQIWDTAGQESFR  
SITRSYYRGAAGALLVYDITRRETFNHLASWLEDARQHANANMTIMLIGNKCDLAHRR AVSTEEGEQFA  
KEHGLIFMEASAKTAQNVEEAFIKTAATIYKKIQDGVFDVSNESYGIKVG YGGIPGPSGGRDGPSASAG  
GCCS

## Protein No.: I-30

Protein name and Species:

Elicitor-responsive protein OS=Hevea brasiliensis GN=ERP

PE=2 SV=1

Accession: [tr|F8SKC5|F8SKC5\\_HEVBR](#)

Unused ProtScore: 27.13

Seq Cov %: 90

ITRAQ Changed Ratio:

117: 115=E3TL: D3TL=0.33

116: 114=E5TL: D5TL=0.40

Annotated typical Precursor MS Region:

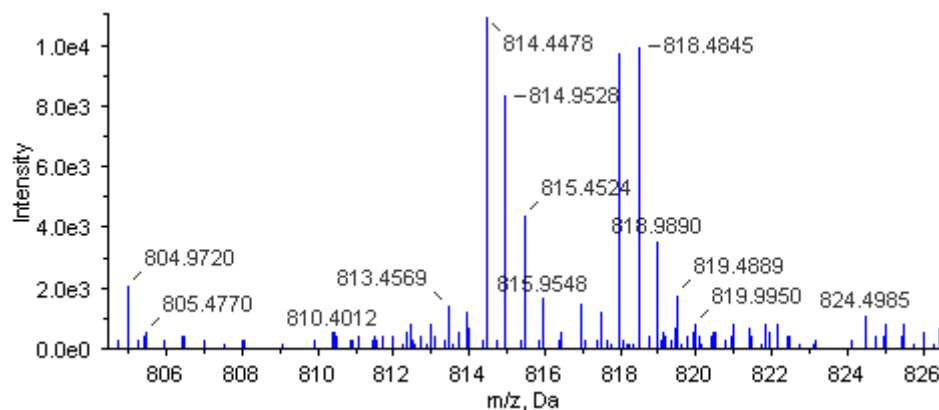

Sequence Coverage and Matched peptides: in different color

MPLGTVEVLLVGAKGLENTDFLNGVDPYVVLACR**TQE**QKSSVASGKGSPEWNEKFSFEVSDGDTLTL  
KIMSDVGAADDFVGEATIPLEPLFLEGNLPSTAYK**VVKEQEYK**GEITVGLTFTPEVEMDNVGVGDYDF  
RL

## **Protein No.: I-31**

### **Protein name and Species:**

**phospholipase D alpha 1-like [Glycine max] OS=Glycine max**

**PE=2 SV=1**

### **Accession:**

**tr|C6TEK4|C6TEK4\_SOYBN**

**Unused ProtScore: 27.02**

**Seq Cov %: 37.6**

### **ITRAQ Changed Ratio:**

**117: 115=E3TL: D3TL=1.60**

**116: 114=E5TL: D5TL=1.32**

## Annotated typical Precursor MS Region:

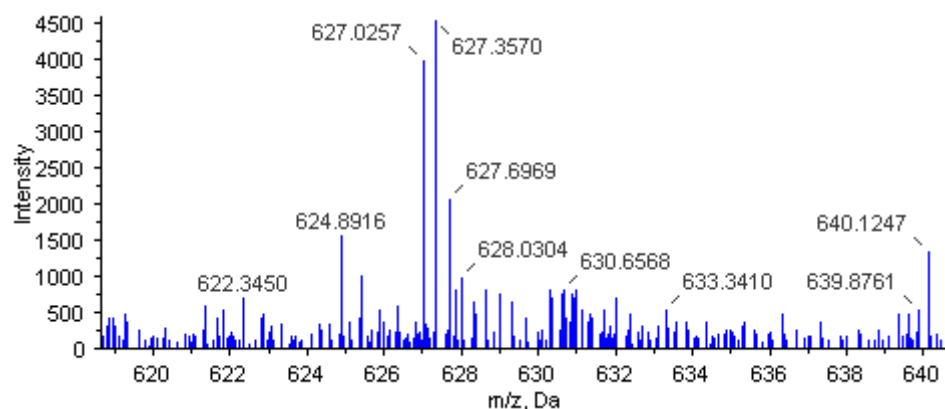

## Sequence Coverage and Matched peptides: in different color

MATEHEDDFKDEK**NPRPLDEDDIALLK**TYGLGPYSTSIK**KAEKEIKEMAKK**VNDLC**GIK**ESDTGLAAPS  
QWDLVSDK**QMMQEEQPLQVAR**CTKIINPNSEDAKYV**INVKQ**IAK**FVVGLGDK**VSPDIEEGMRVGVDRN  
KYQIQIPLPPK**IDPSVTMMTVEEKP**DVTYNDVGGCK**EQIEKMR**EVVELPMLHPEK**FVK**LGIDPPK**GVLC**  
**YGPPGTGK**TLLARAVANR**TDACFIRVIGSELVQK**YVGEARMVRELFQMARSKK**ACIVFFDEVDAIGGA**  
**RFDDGVGGDNEVQRTMLEIVNQLDGF**DAR**GNIK**VL**MATNR**PDTLDPALLRPGRLLDR**KVEFGLPDLESRT**  
QIFKIHTRTMNCERDIRFKLLARLCPNSTGADIR**SVCTEAGMYAIR**ARRKT**VTEKDFLDAVNK**VIKGYQ  
KFSATPKYMYN

## **Protein No.: I-32**

**Protein name and Species:**

**Phospholipase D OS=Ricinus communis GN=RCOM\_0899520**

**PE=3 SV=1**

**Accession: tr|B9RV56|B9RV56\_RICCO**

**Unused ProtScore: 27.02**

**Seq Cov %: 22.7**

**ITRAQ Changed Ratio:**

**117: 115=E3TL: D3TL=0.63**

**116: 114=E5TL: D5TL=0.55**

## Annotated typical Precursor MS Region:

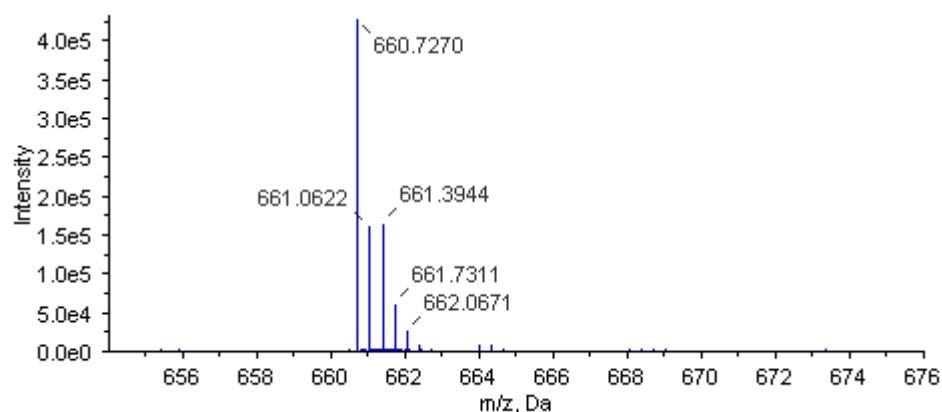

## Sequence Coverage and Matched peptides: in different color

MAQISLHGTLHVTIYEVDKLSGGGPHFFRKLVENIEETVGFVKGVSKLYATIDLEKARVGRTRILENE  
 QSNPRWYESFHVYCAHQASNVIFTVKDDNPIGATLIGRAYVPEELLDGEEIDRWVEILDEDKNPVHSG  
 SKIHVKLQYFEVTKDRNWGQGIRSSKYPGVPYTYFSQRQGCKVSLYQDAHIPDKFVPQIPLAGGNYEYEP  
 HRCWEDVFDAITNAKHLIYITGWSVYTEISLIRDSR~~RPK~~PGGDITLGELLK~~KK~~KASEGVRVLMLVWDDRT  
 SVGLLK~~KK~~DGLMATHDEETEHEFFQNTDVHCVLCPRNPDDGGSFVQDLQISTMFTHHQKIVVDSAMPNGD  
 SQR~~RR~~IVSVFVGGLDLCGRYDSPFHS~~LFR~~TLDSAHHDDFHQPNFAGASIEKGGPREPWHD~~IHSR~~LEGPI  
 AWDVLFNF~~EQ~~RWRKQGGKDL~~LI~~QLRELEDV~~I~~IPSPVMYPDDFEAWN~~V~~QLFRSIDGGA~~AF~~GF~~PET~~PEDA  
 ARAGLVSGKDNI~~IDRS~~IQDAYI~~HAIR~~RAKNFIYIENQYFLGSSFGWSPDGIKPEDINALH~~L~~IPK~~EL~~SLK  
 ILSKIAAGERFTVYIVVPMWPEGIPESASVQAILDWQKRTMEMMYKD~~I~~VQALKANG~~I~~IEDPR~~NYL~~TFFC  
 LGNRE~~V~~KKSGEYEPAEKPEPDTDYIRAQ~~E~~ARRFMIYVHTKMMIVDDEYIIIGSANINQR~~SMD~~GARDSEI  
 AMGAYQPHHLSTRQPARGQIHGFRMSLWYEH~~L~~GMLDESFLNPESEECVRKVNQMAEKYWDLYSSETLEH  
 DLPGHLLRYPIGVASEGDVTELPGT~~EFF~~PD~~TK~~ARVLGAKSDYLPPILTT

## Protein No.: I-33

**Protein name and Species:**

**Peptidyl-prolyl cis-trans isomerase OS=Hevea brasiliensis PE=2**

**SV=1**

**Accession: tr|B3FNQ1|B3FNQ1\_HEVBR**

**Unused ProtScore: 26.07**

**Seq Cov %: 64.5**

**ITRAQ Changed Ratio:**

**117: 115=E3TL: D3TL=0.06**

**116: 114=E5TL: D5TL=0.28**

**Annotated typical Precursor MS Region:**

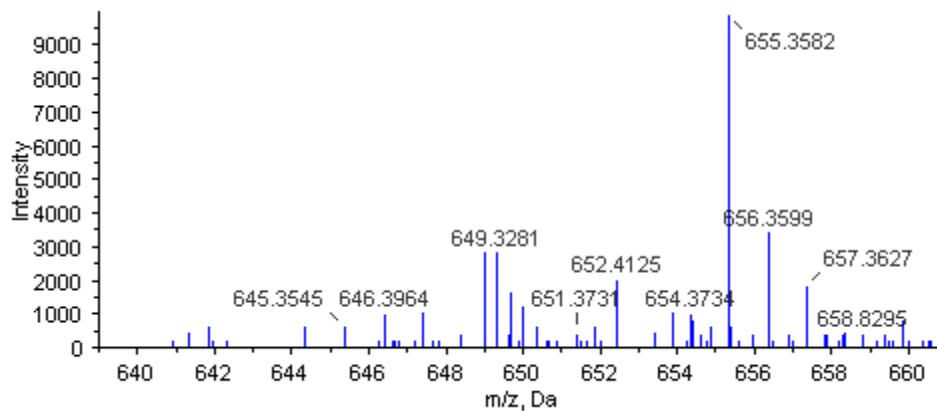

**Sequence Coverage and Matched peptides: in different color**

MANPKVFFDMTIGGAPAGRIVMELFADTTPR**TAENFRALCTGEKGIGR**SRK**PLHYK**GSSFHR**VIPGFMC**  
QGGDFTAGNGTGGESIYGAKFADENFIK**KHTGPGILSMANAGPGTNGSQFFICTAKTEWLDGKHVVFGR**  
VVEGMDVVK**TI**EKVGSSSGR**TSKPVVIADCGQLA**



## Protein No.: I-39

**Protein name and Species:**

**Small rubber particle protein; REF-like stress related protein 2**

**OS=Hevea brasiliensis GN=SRPP PE=4 SV=1**

**Accession: [tr|Q84T88|Q84T88\\_HEVBR](#)**

**Unused ProtScore: 24.89**

**Seq Cov %: 97.4**

**ITRAQ Changed Ratio:**

**117: 115=E3TL: D3TL=0.39**

**116: 114=E5TL: D5TL=0.61**

**Annotated typical Precursor MS Region:**

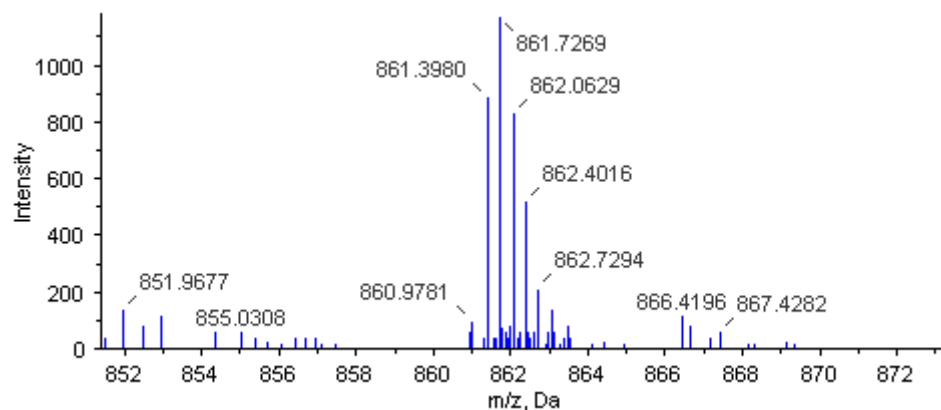

**Sequence Coverage and Matched peptides: in different color**

**MAEGKENENFQQEANEQEEKLKYLEFVQATTDNAVLTALSNIYLYAKDNSGPKPGVETIEGVAKTVVIP**  
**ASKIPTEAIKFADRAVDASFTTLQNIIVPSVLKQLPTQACDTSVKESAE**

## Protein No.: I-40

**Protein name and Species:**

**eukaryotic translation elongation factor 1-alpha OS=Bruguiera  
sexangula GN=bsef-1A PE=2 SV=1**

**Accession: tr|Q8H9B1|Q8H9B1\_9ROSI**

**Unused ProtScore: 24.28**

**Seq Cov %: 45.2**

**ITRAQ Changed Ratio:**

**117: 115=E3TL: D3TL=2.07**

**116: 114=E5TL: D5TL=1.56**

**Annotated typical Precursor MS Region:**

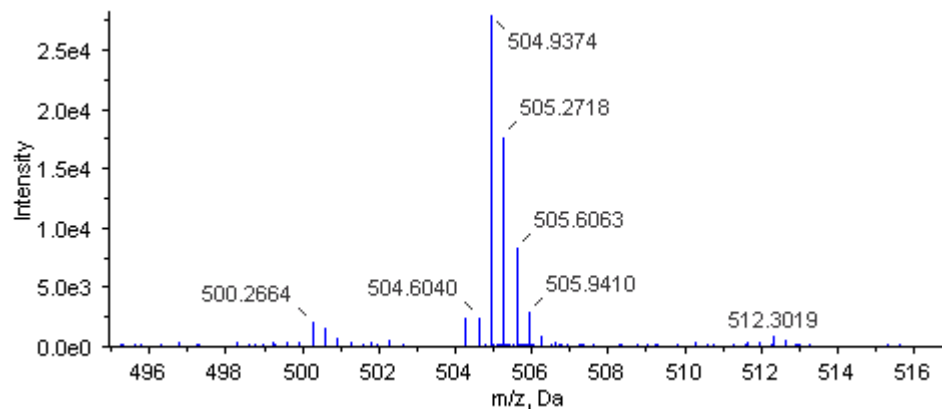

**Sequence Coverage and Matched peptides: in different color**

MGKEKIHIN**IVVIGHVDSGKSTTTGHLIYK**LGGIDKRVIER**FEKEAAEMNK**RSFKYAWVLDK**LKAERER**  
GITIDIALWKFETTK**YYCTVIDAPGHR**DFIK**NMITGTSQADCAVLIIDSTTGGFEAGISK**DGQTR**EHAL**  
**LAFTLVGKQMICCCNK**MDATTSKYSKARY**DEIVKEVSSYLK**KVGYNPEKIPFVPI**SFGFEGDNMIERSTN**  
**LDWYK**GP**TLLEALDMIQEPKRPSDKPLR****LPLQDVYKIGGIGTVPVGRVETGVLKPGMVVTFGPSGLTTE**  
**VKSVEMHHEALQEALPGDNVGFNVK**NVSVKDLK**RGYVASNSK**DDPAKEASSFTSQVIIMNHPGQIGNGY  
APVLDCHTSHIAVKFSEILTKIDRRSGKELEK**EPKFLKNGDAGFVK****MIPTKPMVETFSEYPPLGR**FAV  
RDMR**QTVAVGVIKSVEK**KEPSGAKVTKSAAKKGGK

## Protein No.: I-42

**Protein name and Species:**

**Phosphoglucomutase, putative OS=Ricinus communis**

**GN=RCOM\_0628900 PE=3 SV=1**

**Accession: tr|B9SP64|B9SP64\_RICCO**

**Unused ProtScore: 24.12**

**Seq Cov %: 36.8**

**ITRAQ Changed Ratio:**

**117: 115=E3TL: D3TL=1.87**

**116: 114=E5TL: D5TL=1.11**

**Annotated typical Precursor MS Region:**

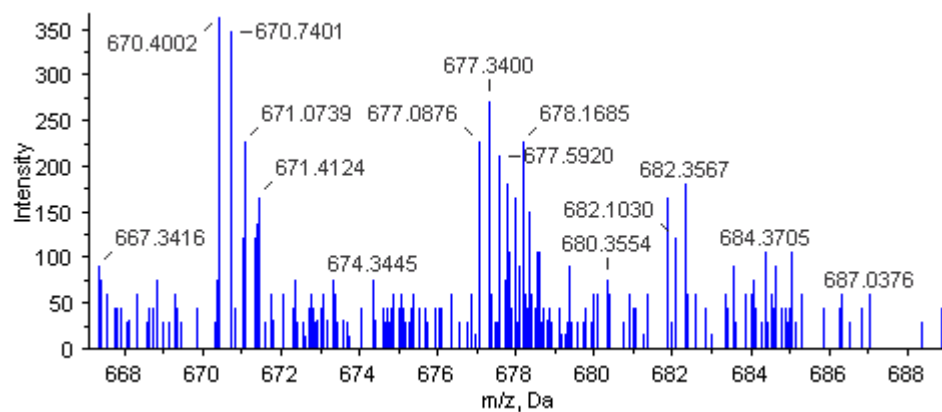

## Sequence Coverage and Matched peptides: in different color

MVFEVSRVSTTPFDGQKPGTSGLRKKVKVFTQPN**YLHNFVQSTFDALTAEK**VR**GATLVVSGDGR**YFSKD  
AIQIIKMSAANGVRR**VWVGQNGLLSTPAVSAVIR**ER**VGLDGSK**ATGAFILTASHNPGGPHEDFGIKYN  
**MENGGPAPEGITDK**IYENTKTIKEYLISDLPDVDISAIGVTNFSGPEGQFDVDVFDSA**DDYVK**LMK**SIF**  
**DFESIK**KLISSPN**FTFCYDALHGVAGAYAK**RIFVEELCAQESSLLNCVPK**EDFGGGHPDNLTYAK**ELV  
ARMGLGK**SNSEVEPPEFGAAADGDADR****NMILGK**RFFVTPSDSVAIIAANAWEAIPYFSAGLKGVAR**SMP**  
**TSAALDIVAK**HNLNLKFFEVPPTGWKFFGNLMDAGLCSVCGEESFGTGSDHIREKDGIVAVLAWLSILAYK  
NKENLNGGK**LVSVEDIVR**NHWATYGRHYTR**YDYENVDAGAAKELMAHLVKLQSSLGEVNEIVK**GIRSD  
VAKVVHGDEFEYKDPVDGSISSHQGIRYLFEDGSRLVFR**LSGTGSEGATIRLYIEQYEK**DSSKTGR**DSQ**  
**EALAPLVEVALK**L**SKMQEFTGR**SAPTIVIT

## Protein No.: I-43

**Protein name and Species:**

**Trehalose-6-phosphate synthase, putative OS=Ricinus communis**

**GN=RCOM\_1251280 PE=4 SV=1**

**Accession: tr|B9S8D6|B9S8D6\_RICCO**

**Unused ProtScore: 23.88**

**Seq Cov %: 22.7**

**ITRAQ Changed Ratio:**

**117: 115=E3TL: D3TL=0.59**

**116: 114=E5TL: D5TL=0.70**

**Annotated typical Precursor MS Region:**

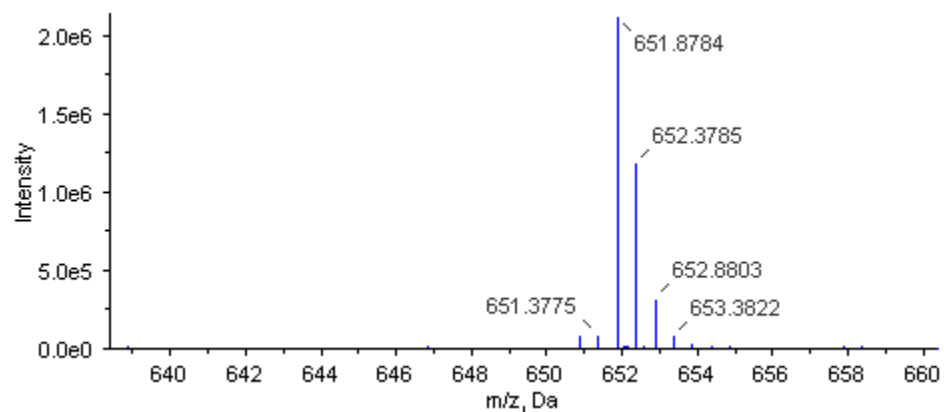

## Sequence Coverage and Matched peptides: in different color

MMSR**SYTNLLDLASGNFPVMGQPR**EKKRLPRVMTVPGVISELDDDDQANSVASDVPSSLVQDR**IIIVANQ**  
**LPVK**AKRRPDNKGWFSWDDDSLQLK**DGLPEDMEVIYVGS**LRVEVDMSEQDDVSQ**LLLD**RFK**CVPAF**  
**LPPDILSKFYHGF**CKQHLWPL**LFHY**MLPFSANHGGRFDR**SLWEAYVAANK**IFSQRVIEVINPEDDYVWIIH  
DYHLMVLPFTFLRRRFNRLRMGFFLHSPFPSSSEIYR**TLPVREEILK**ALLNSDLIGFHTFDYARHFLSCCS  
R**MLGLE**YQSK**RGYIGLEYYGR****TVGIK**IMPVGIHMGQ**IQSVLK**LADKEWRVGE**LKQQFEGK****TVLLGVDDM**  
**DIFK**GVNLK**LLAMEQMLK**QHPKWQ**GRAVLVQIANPAR**GKGDLEIQAEIQASCKRINESFGQPGYEP  
VFIDRPVLSERAAYYTIAECVVVA**AVRDGMNLTPEYIVCR**QGVSGSESSSESNGPKK**SMLVSEFIG**  
**CSPSLSGAIR**VNPWNIEATAEAMNEAISMSDSEKQLRHEKHYRYVSTHDV**AYWARSFFQDMERT**CRDHF  
RRRCWGIGLSFGFR**VVALDPNFR**KLSIDAIVSAYLRSKNR**AILLDYDGTVM**PQTS**INK**SPSQEVISIID  
TLCSDAKNTVFFV**VSGRGR**DSL GKWFSPCR**KLGI**AAEHGY**FMR**WSADRQWETCGQTDFGWIQMAEPVMK  
**LYTESTDGSSIETK**ESALVWHHR**DADPGFGASQAK**EMLDHLESVLANEPVAVKSGQFIVEVKPQGISKG  
FVAEKIFTSMANRQADFVLCIGDDRSDEDMFEIIGNAISSGVLSSSTSVFACTVGQKPSKAKYYVDD  
TGEVINMLEALAEASSPSPSPNSP

## Protein No.: I-49

**Protein name and Species:** Exportin-1 OS=Populus trichocarpa

**GN=POPTRDRAFT\_774005 PE=4 SV=1**

**Accession:** tr|B9I8G4|B9I8G4\_POPTR

**Unused ProtScore:** 22.33

**Seq Cov %:** 12.4

**ITRAQ Changed Ratio:**

**117: 115=E3TL: D3TL=1.84**

**116: 114=E5TL: D5TL=2.19**

**Annotated typical Precursor MS Region:**

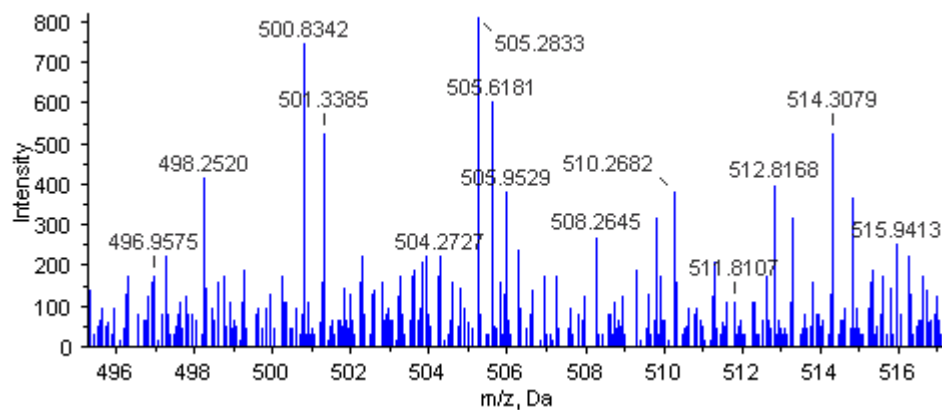

## Sequence Coverage and Matched peptides: in different color

MAAEKFRDLSQAIDVPLLDATVAAFYGTGSKEERVAADRILQDLQNNPDMWLQVVHILQNTKLNLTKEFF  
ALQVLEGVIKYRWNALPVEQRDGMKNYISEVIVQLSSNEASFRMERLYVNKLNVTLVQILKHEWPARWR  
SFIPDLVAAAKTSETICENCMVILKLLSEEVDFDSRGEMTQQKIKELKQSLNSEFQLIHELCLYVLSAS  
QRTELIRATLSTLHAFLSWIPLGYIFESPLLETLLKFFPMPSPYRNLTQCLTEVAALNFGDFYNIQYVK  
MYNFFMVQLQAILPLTTNIPEAYANGSSEEQAFIQNLALFFTSFYKSHIQVLESTQENITALLMGLEYL  
INICYVDDTEVFKVCLDYWNSLVLELFEARHNLDNPAVAVNMMGLQMPLLHGMVDGLGSQILQRRQLYA  
TPMSKLRMLMICRMAKPEEVLIVEDENGNIVRETMKDNDVLVQYKIMRETLIYLSHLDHEDTEKQMLKK  
LSKQLSGEDWNWNNTLTCWAIGSISGSMEEQENRFLVMVIRDLLNLCEITKGDKNKAVIASNIMYVV  
GQYPRFLRAHWKFLKTVVNKLFEFMHETHPGVQDMACDTFLKIVQKCKRKFVIVQVGESEPFVSELLAG  
LPTTVADLEPHQIHTFYESVGHMIIQAESDPQKRDEYLQRLMDLPNQKWAEIIGQARQSVDFLKDQDVIR  
TVLNIMQTNTSVASALGTYFLSQISLIFLDMLNVYRMYSELISSSIAEGGPYASKTSYVKLLRSVKRET  
LKLIIETFLDKAEDQTQIGKQFVPPMMDPVLGDYARNLPDARESEVLSLFIATINKYKAAMIEDVPRIFE  
AVFQCTLEMITKNFEDYPEHRLKFFSLLRAIATHCFPALIRLSSEQLKLVMSIIWAFRHTERNIAETG  
LNLLVEMLKNFQASEFCNQFYRSYFLTIEQEIFAVLTDTFHKPGFKLHVVLVQLHLFCLVESGALTEPLW  
DAATISYSYPNNAMFVREYTIKLLGTSFPNMTASEVTQFVNGLFESRNDLSAFKNHIRDFLVQSKEFSA  
QDNKDLAEEAAAQRERERQRMLSIPGLIAPNEIQDEMLDS



# Protein No.: I-50

**Protein name and Species:**

**Invertase 2 OS=Hevea brasiliensis GN=NIN2 PE=2 SV=1**

**Accession: [tr|E9KF95|E9KF95\\_HEVBR](#)**

**Unused ProtScore: 22.29**

**Seq Cov %: 26**

**ITRAQ Changed Ratio:**

**117: 115=E3TL: D3TL=1.51**

**116: 114=E5TL: D5TL=2.20**

**Annotated typical Precursor MS Region:**

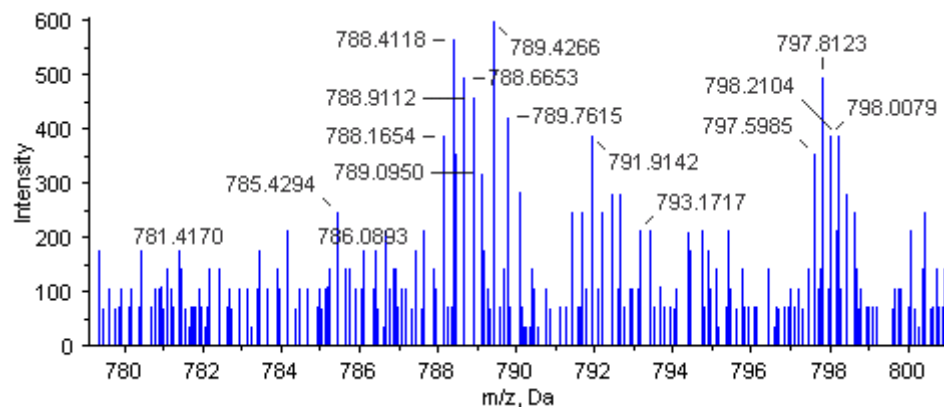

**Sequence Coverage and Matched peptides: in different color**

MDGTKEVGLR**NVSS**TC**SI**SEMDD**FD**LSRLLDKPRL**LN**IERQRSFDER**SL**SELSIGLTRGGLDYCEITYSP  
**GGR**SGLDTPVSSARNSFEPHPMVADAWAELRR**SIVY**FERGQPVGTIAAIDHASEEVLNYDQVFVR**DFVPS**  
**AL**AFLMNGE**PE**IVKNFLKTLHLQGW EKRIDRFK**LGE**GVMPAS**FKVL**HDPVR**KTD**TL**MAD**FGESAIGRV  
APVDSGFWW**IILL**RAYTK**ST**GDLS**LA**ET**PECQK**GMRLIILTLCLSEGFDTFPTLLCADGCSMIDRRMGIY  
GYPIEQALFFMALR**CAL**SMLKHDTEGKECIEIRIVKRLHALSYHIRSYFWLDFQQLNDIYRYK**TEEY**SH  
**TAV**NKFNVIPDSIPDWFVDFMPTR**GGY**FI**GN**IS**PAR**MDFRFWALGNCVAILSSLATPEQSMALDIES  
RWEELVGEMPLK**IAY**PA**IES**HDWR**I**VTG**CD**PKNTRWSYHNGGWPVLLWLLTAACIKTGRPQIARRAID  
LAETRLLKDSWPEYYDGKLGK**FI**GKQARKYQ**TW**SIAGYL**VAK**M**LE**DP**SH**LGMIS**LE**EDKQMK**PVI**KRS  
**SS**WTC

## Protein No.: I-53

**Protein name and Species:**

**Sucrose synthase OS=Manihot esculenta PE=2 SV=1**

**Accession: [tr|A9NIV2|A9NIV2\\_MANES](#)**

**Unused ProtScore: 21.98**

**Seq Cov %: 15.9**

**ITRAQ Changed Ratio:**

**117: 115=E3TL: D3TL=0.57**

**116: 114=E5TL: D5TL=0.62**

**Annotated typical Precursor MS Region:**

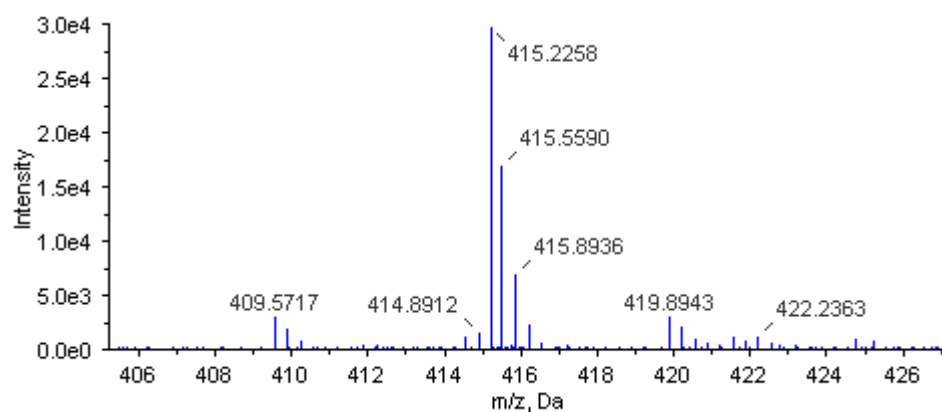

## Sequence Coverage and Matched peptides: in different color

MAERVITRVQSIRER**LDETL**SAHRNEIVALL**SR**IEGKGGKILQHHQIIAEFEEIPEENRKK**LLESVFGE**  
**VL**RS**AE**AI**VL**PP**W**VAL**AVR**PRPGVWEYIR**VNV**HAL**VVEELR**VAEYL**HFK**EELVDG**SV**NGNFVLELDFE  
PFNASFPRPTLSKY**YIGN**VE**FLNR**HLSAKLFHDK**ESLHPLLEFLK**VHCHKGKNMMLNDR**IHNLD**SLQ**YV**  
**LR**KAEEYLTALAPETPYSQFEHK**FQEIGLER**GWGDTAERVLEMIRLLLDLLEAPDPCTLETFLGRIPMV  
FNVVIMSPHGYFAQDNVLGYPDTGGQVVYILDQVR**ALET**EM**LHR**IK**QQGLDITPR**IL**IITR**LL**PDAVGT**  
**TCGQR**LEK**VFGTEHSDILR**IPFKTEKGIVRKWISRFEVWPYLETYTEDVATEIGKEFQGKPDLI**FGNYS**  
DGNIVASLLAHK**LGVTECTIAHALEK**TKYPESDIYWKKFDEKYHFSCQFTADLIAMNHTDFIITSTFQE  
IAGSK**DTV**Q**YESHTAL**TL**PGLYR**V**VHGIDV**FD**PK**FNIVSPGADETIYFSYTEEKRRRLTSFHPEIEELL  
YSPVENEHL**CVL**KDR**SKPIIFT**MARLDRVK**NLTGL**VEWY**GK**NAKL**REL**ANL**VVGGDR**RKESK**DLEEQ**  
**AEM**KKMHS**LIEKYN**L**NGHFR**WISSQMN**RVR**NGELYRY**ICDTK**GVFVQPAIYEAFGLTVVEAM**TCGLPTF**  
**ATC**NG**GPAEII**V**HGK**SGFNIDPYHGDQAAELLVQFFEKCKADPSHWIKISEGAMQRIQEKYTWQIYSQR  
LLTLTG**VYGF**WKHVSKLDRRESRR**YLEMFYALK**YRKLAE**SVPL**TVED

## Protein No.: I-54

**Protein name and Species:**

**Malate dehydrogenase OS=Populus trichocarpa**

**GN=POPTRDRAFT\_747123 PE=3 SV=1**

**Accession: tr|B9NBW3|B9NBW3\_POPTR**

**Unused ProtScore: 21.97**

**Seq Cov %: 32.8**

**ITRAQ Changed Ratio:**

**117: 115=E3TL: D3TL=0.31**

**116: 114=E5TL: D5TL=0.92**

**Annotated typical Precursor MS Region:**

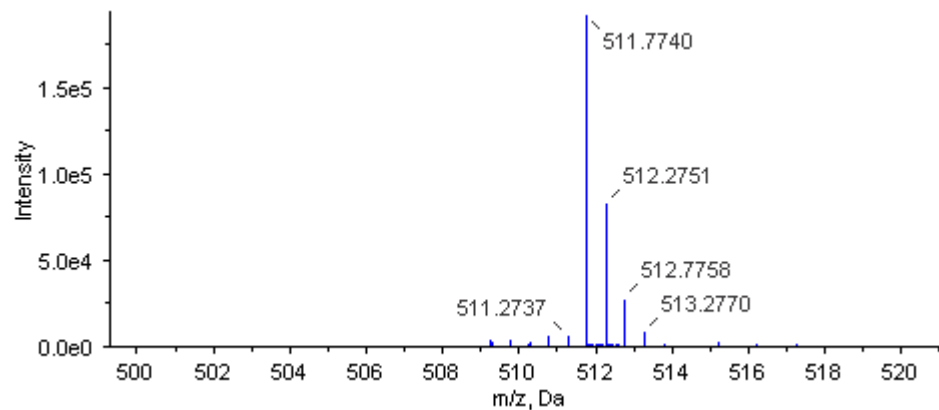

**Sequence Coverage and Matched peptides: in different color**

MAKEPARVLVTGAAGQIGYALVPMIARGVMLGPDQPVILHMLDIPPAEALNGVKMELVDAAFPLLKGV  
VATTDVVEACTGVNIAVMVGGFPRKEGMRKDVMSKNVSIYK SQASALEKHAAANCKVLV VANPANTNA  
LILKEFAPSIPEKNITCLTRL D HNRALGQISERLNVQVSDVKNVLIWGNHSS TQYPDVN HATVKTPAGE  
KPVRELVKDDAWLN AEFITTVQQRGA AIKARKLSSALS AASSACDHIHDWVLGTPEGTWVSMGVYSDG  
SYNVPAGLIYSFPVTCQNGEWKIVQGLSID EFSRK KLDLTADELSEEKALAYSCLT

## Protein No.: I-55

Protein name and Species:

Chaperonin containing t-complex protein 1, zeta subunit, tcpz,  
putative OS=Ricinus communis GN=RCOM\_1727810 PE=3  
SV=1

Accession: tr|B9RSN1|B9RSN1\_RICCO

Unused ProtScore: 21.39

Seq Cov %: 30.8

ITRAQ Changed Ratio:

117: 115=E3TL: D3TL=1.51

116: 114=E5TL: D5TL=1.63

Annotated typical Precursor MS Region:

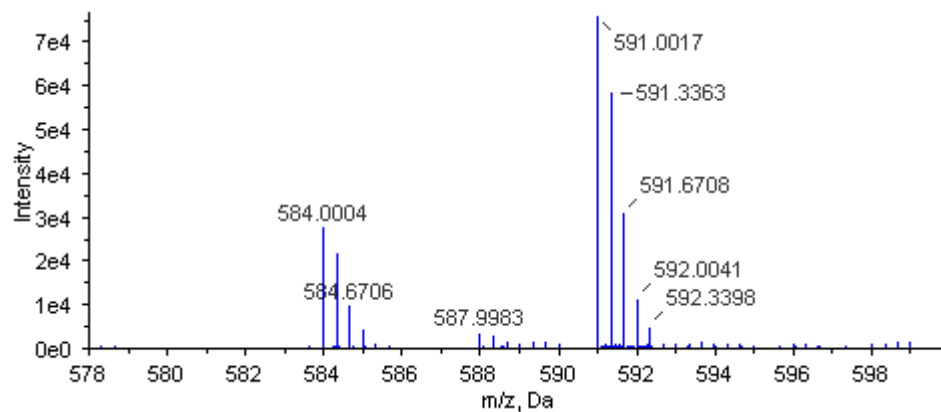

Sequence Coverage and Matched peptides: in different color

MSLRVLPNPAEVLNKSAAALHMNINAAGLQDVLKSNLGPKGTIKMLVGGAGDIKLTKDGNLTLKEMQIQ  
NPTAIMIARTAVAQDDISGDGTTSTVIFIGELMKQSERYIGEGMHPRLVDGFELAKRATLQFLEKFKT  
PVMGDEPDKEILKMVARTTLRTKLYETLADQLTDIVVNAVLCIRKPEEAIDLFMVEIMHMRHKFDVDT  
RLVEGLVLDHGSRHPDMKRRAENCYILTCNVSLLEYDKSEINAGFFYSNAEQRKEMVAAERRQVDERVEK  
IIELNKNCVSGNDNNFVVINQKIDPPSLDLLARAGIITALRAKR RNMERLVLACGGEAVNSVDDLTPD  
CLGWAGLVYEHILGEEKYTFVEHVKNPHSCTILLKGPNDHTIAQIKDAVRDGLRAVKNTIEDEAVVLGA  
GAFELAARKYLISEVKKTVKGRAQLGIEAFADALLVIPKTLAENSGGLDTQDEIVSLTGEHDR ENIVGLN  
LQTGGPLDPQMEGIFDNYSVKRQLINSGPVIASQLLLVDEVIRAGRNMRKPN

## Protein No.: I-57

**Protein name and Species:** Luminal binding protein (BiP),  
Nucleotide-Binding Domain of the sugar kinase/HSP70/actin  
superfamily OS=Thellungiella halophila PE=2 SV=1

**Accession:** [tr|E4MXI2|E4MXI2\\_THEHA](#)

**Unused ProtScore:** 21.05

**Seq Cov %:** 24.2

**ITRAQ Changed Ratio:**

**117: 115=E3TL: D3TL=3.50**

**116: 114=E5TL: D5TL=2.24**

**Annotated typical Precursor MS Region:**

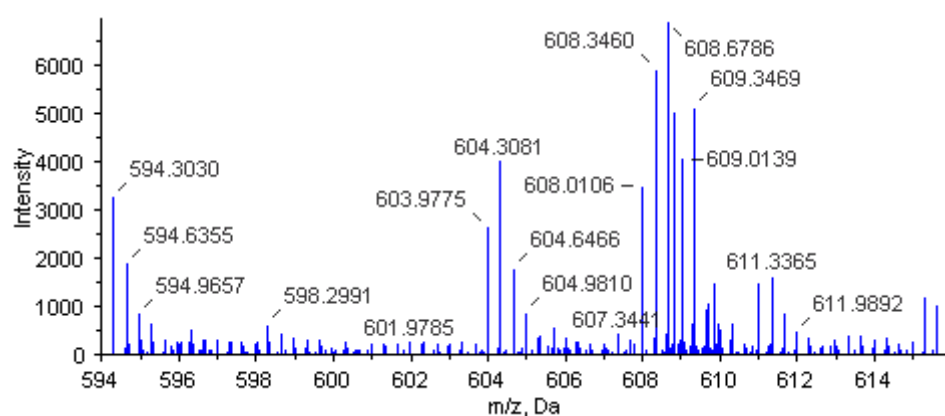

## Sequence Coverage and Matched peptides: in different color

MARSGANGTVVLAIIFFGCLFAFSTAKEEATKLGTVIGIDLGTTYSCVGVYK**NGHVEIIANDQGNR**IT  
PSWVGFTDSERLIG**EAAK**NQAAVNPER**TIFDVK**RLIGRKFEDKEVQKDKKLVPYQIVNKDGK**PYIQVK**I  
KDGETKVFSPEEISAMILTKMKETAEAYLGKK**IKDAVVTVPAYFNDAQR**QATK**DAGVIAGLNVAR**I**INE**  
**PTAAAIAYGLDKK**GGGEKNILVFDLGGGTFDVSFLTIDNGVFEVL**STNGDTHLGGEDFDHR**IMDYFIKLI  
KKKHQKDISKDNKALGKLRRECERAKRALSSQHQVR**VEIESLFDGVDFSEPLTRAR****FEELNNDLFR****KTM**  
**GPVK**KAMDDAGLQKS**QIDEIVLVGGSTR**IPK**VQQLLK**DFFEKGKEPNK**GVNPDEAVAYGAAVQGGILSGE**  
**GGDETK**DILLLDVAPLTLGIETVGGVMTKLI**PRNTVIP**TKKSQVFTTYQDQQTTSIQVFEGERSLTKD  
CRLLGK**FDLTGIPPAPR**GTPQIEVTFEVDANGILNVKAEDKASGKSEK**ITITNEKGR****LSQEEIER**MVKE  
**AEEFAEDK**KVKERIDAR**NSLETYVYNMK**NQVSDKDKLADKLEADEKDKIEAATKEALEWLDENQNSEK  
EDYEEK**LKEVEAVCNPIITAVYQR**SGGAPGAAGGDSATDEEESHDEL

## **Protein No.: I-58**

**Protein name and Species: Glucosamine-fructose-6-phosphate  
aminotransferase, putative OS=Ricinus communis  
GN=RCOM\_1077800 PE=4 SV=1**

**Accession: tr|B9RM60|B9RM60\_RICCO**

**Unused ProtScore: 21.05**

**Seq Cov %: 22.7**

**ITRAQ Changed Ratio:**

**117: 115=E3TL: D3TL=0.36**

**116: 114=E5TL: D5TL=0.70**



## Annotated typical Precursor MS Region:

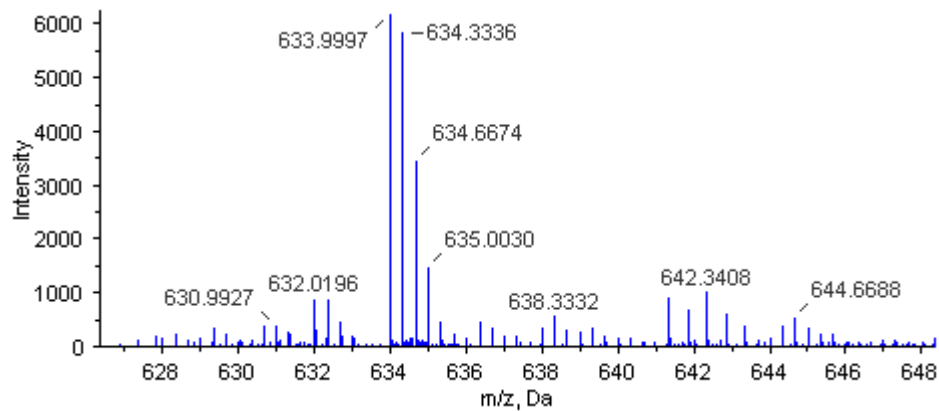

## Sequence Coverage and Matched peptides: in different color

MCGIFAYLNYNVNRERRRYILQVLFNGLRRLEYRGYDSAGISIENSIPESSDPIPSSSSHSPSPLVFRQ  
**EGNIESLVK**SVYQDVATIDLNLEESF**SVHAGIAH**TR**WATHGEPAPR**NSHPQTSAGAGNEFLVVHNGVITN  
 YEVLKETLVRHGFTFESETDTEVIPKLAKY**VFDK**ANEGEQAQPVTFSQVV**LEVMR**HLEGAYALIFK**SRH**  
**YPNELIACKR****GSPLLLGVKELNEDMNSGSAFHDAK**SLSKDGHAK**ELFLSSDANAIIEHTK**R**VLMIEDGE**  
**VVHLK**DGSVSIKLFENAKGRHGGALSRPASVQR**ALSVLEMEVEQINK**GNYEHYMQK**EIHEQPESLTTM**  
**RGRLIRGGCKAKTVLLGGLK**DHLKTIRRSRR**IVFVCGGTSYNAALAAAR**PILEELSGVPVTMEIASDLV  
 DRQPIYREDTAVFVSQSGETADTLHALEYALENGALCVGITNTVGSIAIARNTHCGIHINAGAEIGVAS  
 TKAYTSQIVVMAMALAIIGDAISSQAKR**EAIIDGLEFDLPNR**VREVLKLDQEMKDLAELLMAEQSLLVF  
 GR**GYNYATALEGALKVK****EVALMHSEGLAGEMK**HGPLALVDENLPIIVIIATRDAEFRK**QSVIQQLHAR**  
 KGRLIVMCSKGDAAASVCPGESCRVIEVPQVEDCLQPVVNIVPLQLLAYH**LTVLR****GYNVDQPR**NLAKSVT  
 TQ

## Protein No.: I-60

**Protein name and Species:**

Leucine aminopeptidase, putative OS=Ricinus communis

GN=RCOM\_0623200 PE=3 SV=1

**Accession:** tr|B9STR1|B9STR1\_RICCO

**Unused ProtScore:** 20.86

**Seq Cov %:** 29.1

**ITRAQ Changed Ratio:**

**117: 115=E3TL: D3TL=0.29**

**116: 114=E5TL: D5TL=0.40**

**Annotated typical Precursor MS Region:**

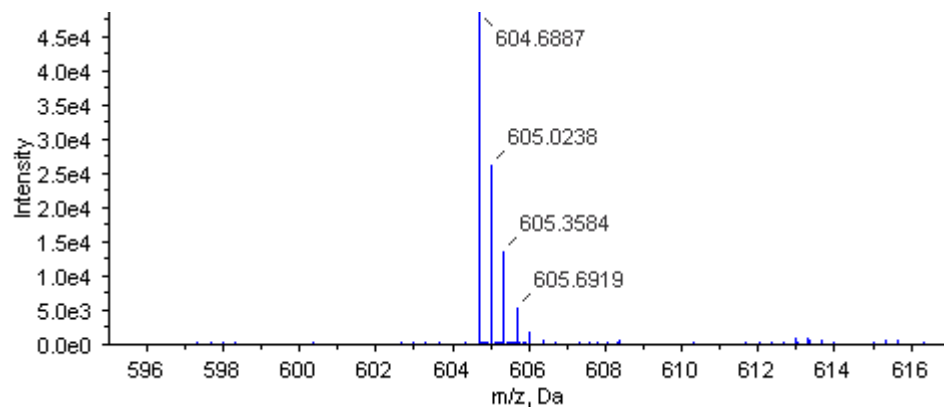

## Sequence Coverage and Matched peptides: in different color

MAARVVSLAASISSFAVPFSSTSSSLFLTRLRSPSVLRFSFAVAPLSYR**SRGGGGGGGGKLM**MAHSLARA  
**TLGLTQ**PANVDV**PKISFSAK**EIDVVEWK**GDILAVGVTEK**DMTKDKSTK**FDNSLLK****KLDTHLG**LLEAS  
**SEEDFTGKAGQSMVLR**LP**GLGSK**RIGLIGLGQSASTTFAFRNFGETI**AATAKAAQ**ASNVAIVL**ASAESI**  
**SNELKLNTASAIASG**TVLGTYEDARFK**SESK**KPVLKSVDILGFGTGPD**LAKKLYAEDVSSAVIFG**KEL  
**VNSPANVLT**PAVLAEE**ASKIASTYSDVLSANILSAEQCK**ELKMGSYLGVAAASANPPHF IHLHYKPP**GG**  
**TVKAKLALVGKGLTFDSGGYNIKTGPGCSIELMKFDMGGSAAVLGAAK**AIGQIKPPGVEVHFIVAACEN  
MISGTGMR**PGDIVTASNGKTIEVNNTDAEGRLTLADALVYACNQGVDK**IVDLATLTGACVVALGPSIAG  
VFTPSDDLANEVFTAAE**ASGEK**LWRMPLEESYWENMK**SGVADMVNTGGRQGGAITAALFLK**QFINEKVQ  
WMHIDMAGPVWNEKKRTATGFGISTLVEWILHNSS

# Protein No.: I-61

**Protein name and Species:**

**Rab GDP dissociation inhibitor OS=Ricinus communis**

**GN=RCOM\_1750690 PE=4 SV=1**

**Accession: tr|B9RIY3|B9RIY3\_RICCO**

**Unused ProtScore: 20.57**

**Seq Cov %: 41.2**

**ITRAQ Changed Ratio:**

**117: 115=E3TL: D3TL=0.63**

**116: 114=E5TL: D5TL=0.39**

**Annotated typical Precursor MS Region:**

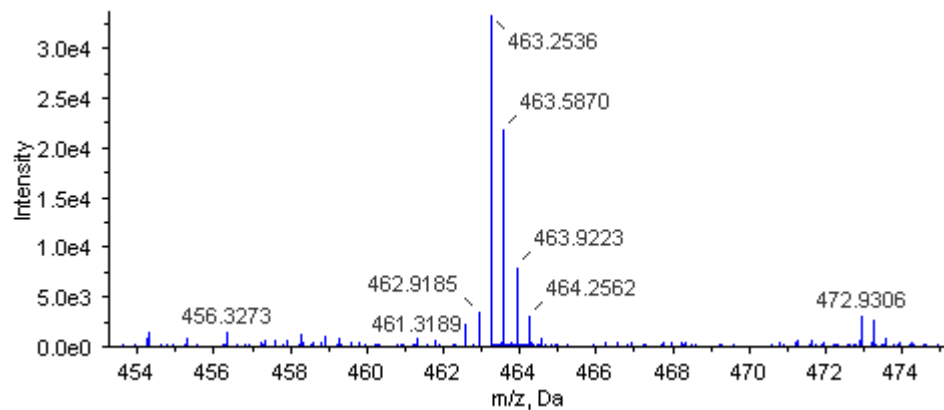

**Sequence Coverage and Matched peptides: in different color**

MDEEYDVIVLGTGLK**ECILSGLLSVDGLK**VLHMDKNDYYGGESASLNLNLQWKRFR**GSDKPPAHLGSSR**  
**DYNVDMIPKFMANGNLVRLIHTDVTKYLYFKAVDGSFVYNK**GKVHK**VPATDMEALKSPLMGIFEKRR**  
ARK**FFIYVQDYNESDPKTHEGMDLTRVTTR****ELIAKYGLDDNTMDFIGHALALHR**DDRYLDEPALDVTMR  
MK**LYAESLAR**FQGGSPY**IYPLYGLGELPQAFARLSAVYGGTYMLNKPECKVEFDEEGKVVGVTSEGETA**  
**KCKKVVCDPSYLPNK**ARKVSRVAR**AIAIMSHPIPNTNDSHSAQVILPQQLGRR****SDMYLFCESYSHNVA**  
**PK**KGKYIAFVSSEAETDNPEVELKPGIDLLGPVDEIFFEYVDRYEPVNEPSLDNCFISTSYDATTHFEST  
VTDVNLNMYSMITGKVLDSLVDLSAASAAEE

## Protein No.: I-64

### Protein name and Species:

Alpha-1,4-glucan-protein synthase [UDP-forming], putative  
OS=Ricinus communis GN=RCOM\_1468610 PE=4 SV=1

Accession: [tr|B9RLK7|B9RLK7\\_RICCO](#)

Unused ProtScore: 19.65

Seq Cov %: 36.3

### ITRAQ Changed Ratio:

117: 115=E3TL: D3TL=0.60

116: 114=E5TL: D5TL=0.44

### Annotated typical Precursor MS Region:

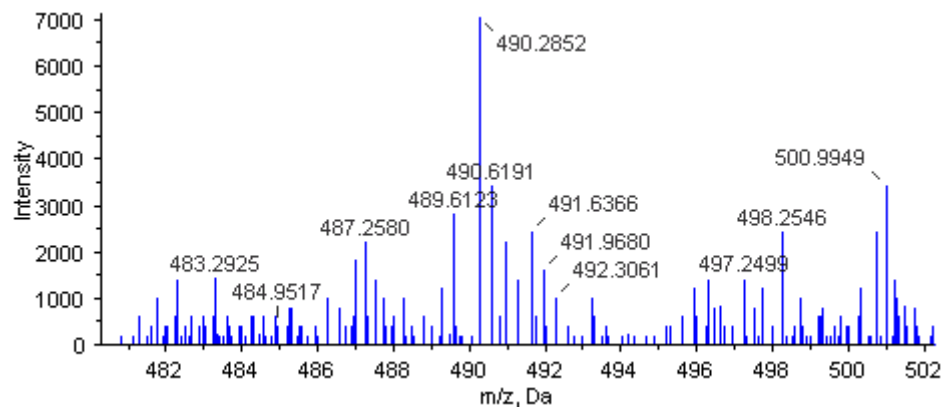

### Sequence Coverage and Matched peptides: in different color

MADFAAISPTPLLKDEL

D

I

V

I

P

T

I

R

N

L

D

F

L

E

M

W

R

P

F

F

Q

P

Y

H

L

I

I

V

Q

D

G

D

P

S

K

I

I

K

V

P

E

G

F

D

Y

E

L

Y

N

R

N

D

  
INRILGPKASCI

S

F

K

D

S

A

C

R

C

F

G

Y

M

V

S

K

K

K

Y

I

Y

T

I

D

D

D

C

F

V

A

K

D

P

S

G

K

D

I

N

A

L

E

Q

H

I

K

N

L

L

C

P

S

T

P

F

F

F

  
NTLYDPYR

T

G

A

D

F

V

R

G

Y

P

F

S

L

R

E

G

V

P

T

A

V

S

H

G

L

W

L

N

I

P

D

Y

D

A

P

T

Q

L

V

K

P

L

E

R

N

T

R

Y

V

D

A

V

M

T

I

P

K

G

T

L

F

  
PMCGMNLAFNRELIGPAMYFGLMGDGP

I

G

R

Y

D

D

M

W

A

G

W

C

T

K

V

I

C

D

H

L

G

F

G

V

K

T

G

L

P

Y

I

Y

H

S

K

A

S

N

P

F

V

  
NLKKEYKGIYWQEELIPFFQSAVLPKECTTVQK

C

Y

I

E

L

S

K

Q

V

R

A

K

L

G

K

I

D

E

Y

F

V

K

L

A

D

A

M

V

T

W

V

E

A

W

D

E

  
LNPSGNSGELPNGAAK

## Protein No.: I-69

**Protein name and Species:**

**Heat shock protein 70 (HSP70)-interacting protein, putative  
OS=Ricinus communis GN=RCOM\_1679700 PE=4 SV=1**

**Accession: tr|B9RBP6|B9RBP6\_RICCO**

**Unused ProtScore: 18.74**

**Seq Cov %: 19.2**

**ITRAQ Changed Ratio:**

**117: 115=E3TL: D3TL=0.58**

**116: 114=E5TL: D5TL=0.57**

**Annotated typical Precursor MS Region:**

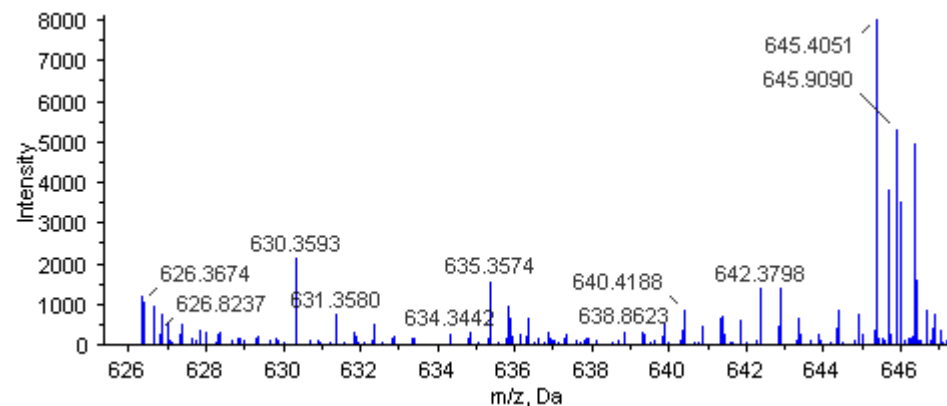

**Sequence Coverage and Matched peptides: in different color**

MAEEAKAKGNAAFSGDFTTAVKHFTEAIS IAPSNHVLYSNR **SAALASLHNYADAL**TD**AK**KTVELKPDW  
SKGYSRLGAAYLGLNQTDQDAISAYKKGLDIDPSNEALKSGLADAQARFSAPPPPPSPFGDAFNGPEMWA  
**KL**TAD**P**STR**MYL**Q**QP**DF**VK**MMQEIQ**K****NP**NN**L**N**L**Y**LK**DQR**VM**Q**AL**G**V**LL**N**L**K**FRAPNAGAEDMEVPQEDD  
HSSSPPPQAEQPAKKAPQPEPEPEPMDVITEEDKEAKERKAQAVKEK**EL**G**NA**A**YK**QKDFETAISHYTT**A**  
**L**EL**D**ED**I**S**Y**L**T**NR**AA**V**Y**LE**M**G**K**YEDCI**K**D**CD**KA**V**ER**G**RELRSDFKMIARAL**TR**KGTALVKMAKSS**K**D**Y**  
**D**SA**I**ET**F**Q**K**ALTEHRNPETLKKLN**E**ARAK**K****E**LE**Q**Q**E**Y**F**DP**K**LADEERE**K****G**NE**Y**F**K**Q**Q**K**Y**PE**A**V**K**HY**T**E  
**S**LR**R**NPEDPRAYS**N**RAAC**Y**TK**L**GA**L**PE**G**L**K**DAEK**C**IE**L**DP**T**F**T**K**G**Y**T**R**K**G**A**V**Q**FF**M**KEY**D**K**A**LE**T**Y**Q**E**G**  
**L**K**H**DP**Q**N**Q**EL**L**D**G**V**R**RC**V**E**Q**L**N**K**A**S**R****G**D**L**S**P**E**E**L**K**ER**Q**AK**A**M**Q**DP**E**I**Q**N**I**L**S**DP**V**M**R**Q**V**L**V**DF**Q**EN**P**K**S**  
AQDHMK**N**P**M**V**M**N**K**I**Q**K**L**V**N**AG**I**V**Q**I**R**

## Protein No.: I-70

**Protein name and Species:**

**DnaJ protein OS=Hevea brasiliensis PE=2 SV=1**

**Accession: [tr|Q9ZSZ6|Q9ZSZ6\\_HEVBR](#)**

**Unused ProtScore: 18.66**

**Seq Cov %: 38.1**

**ITRAQ Changed Ratio:**

**117: 115=E3TL: D3TL=0.52**

**116: 114=E5TL: D5TL=0.45**

**Annotated typical Precursor MS Region:**

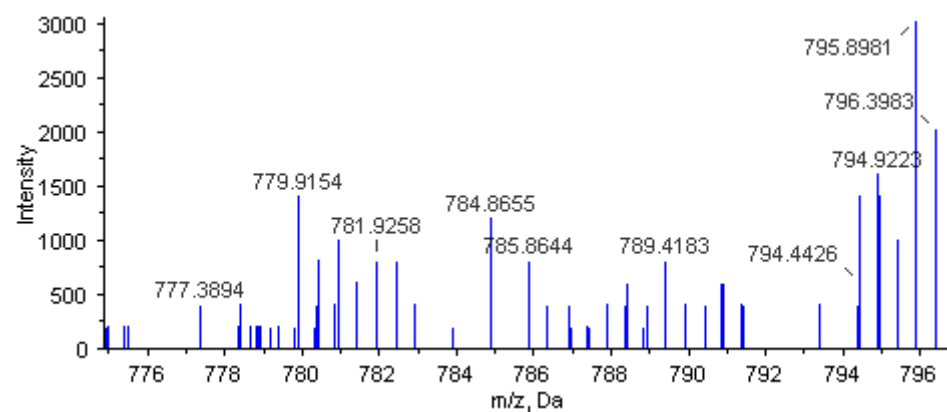

## Sequence Coverage and Matched peptides: in different color

MFGRAPKKSDNTKYYEILGVSKNASQDDLKKA YRKAAIKNHPDKGGDPEKFKELAQAYEVLSDPEKREI  
YDQYGEDALKEGMSGGGGAHDPFDIFQSFFGGNPFGGGGSSRGRRKEGEDVIHPLKVSLEDLYNGTSKK  
LSLSRNVICSKCKGKGSKSGASMKCSGCQSGMKVSI RQLGPSMIQQMQHPCNECKGTGETINDKDRCP  
QCKGEKVVQEKKVLEVIVEKGMQNGQRITFPGEADEAPDTITGDIVFVLQQKEHPKFKRKGDDLIVDHT  
LSLTEALCASQFILTHLDGDLLIK SQPGEVVKPDQFKAINDEGMPMYQRPFMRGKLYIHF SVDFPDSL P  
PDQCKALEAVLPSRTSVQLSDMELDECEETTLHDVNFDEEMR R KQQQAQEAYDEDDDMHGGGQRVQCAQ  
Q



# Protein No.: I-71

Protein name and Species:

Phosphoglycerate kinase OS=Ricinus communis

GN=RCOM\_1574570 PE=3 SV=1

Accession: [tr|B9RHY3|B9RHY3\\_RICCO](#)

Unused ProtScore: 18.31

Seq Cov %: 33.9

ITRAQ Changed Ratio:

117: 115=E3TL: D3TL=0.54

116: 114=E5TL: D5TL=0.63

Annotated typical Precursor MS Region:

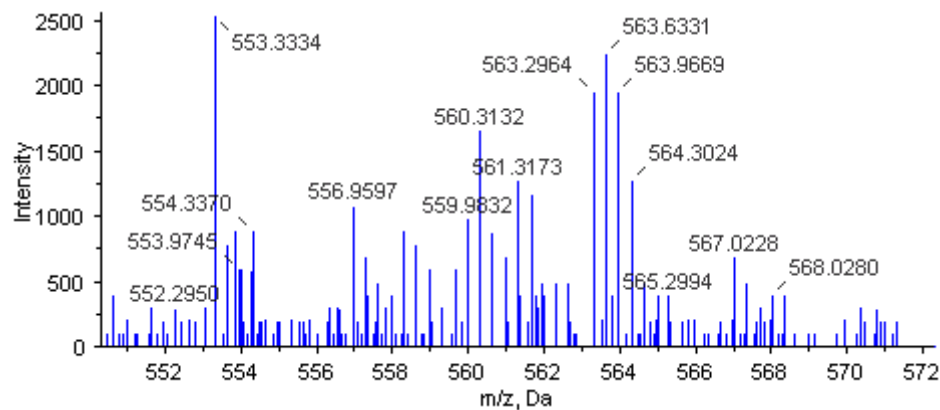

Sequence Coverage and Matched peptides: in different color

MATKKSVSSLKEADLK GKR V FVRVDLNVPLDDNLNITDDTR I RAAVPTIKYLMDHGARVILCTHLGRPK  
GVTPKYSLKPLVPRLSSELLGVEVKMASDCIGEEVEKLVAEIPEGGVLLLENVRFHKEEEKNEPEFAKKL  
AGLADVYVNDAFGTAHRAHASTEgvakylkpsvAGFLMQKELDYLVGAVANPKKPFAAIVGGSKVSTKI  
GVIESLLEKVDILILGGMIFFYKAQGHVGS S LVEGDKLDLASSLIEKAKAKGVDLLLLPTD VVIADK  
FAADANSKVV PASSIPDGWMLDVGPD AIKTFCEALD TTQTI IWN GPMGVFEFDKFAVGTEAI AKKLA E  
LSGKGVTTIIGGGDSVA AVEK VGLADKMSHISTGGASLELLEGGKPLPGVLALDDA

## Protein No.: I-73

**Protein name and Species:**

**Alanyl-tRNA synthetase, putative OS=Ricinus communis**

**GN=RCOM\_0036070 PE=3 SV=1**

**Accession: tr|B9SYR5|B9SYR5\_RICCO**

**Unused ProtScore: 18.11**

**Seq Cov %: 13.1**

**ITRAQ Changed Ratio:**

**117: 115=E3TL: D3TL=0.63**

**116: 114=E5TL: D5TL=0.52**

**Annotated typical Precursor MS Region:**

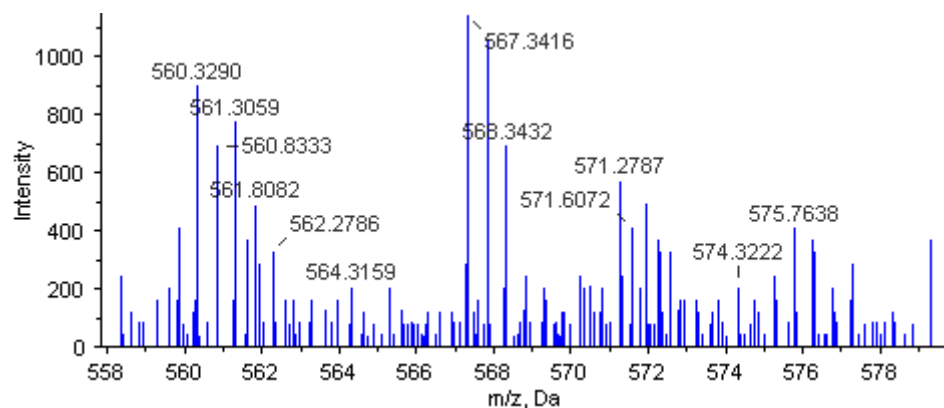

## Sequence Coverage and Matched peptides: in different color

MKRITSTAAAAAASSLSVTLHRTALHSPHLLAAIVVAAARVSLHPSRATLFAFSSSSSSPILLSHIA  
AMPGVDPQEMEWPAKKVRDTFIS**FFEDK**KHVHWKSSPVVNDPTLLFANAGMNQFK**PIFLGTADPNTA**  
**LSK**LSRACNTQKCI RAGGK**HNDLDDVGK**DTYHHTFFEMLGNWSFGDYFKREAIGWAWELLTKIYKLPAD  
RIYATYFGGDEKAGLAPDAEARDFWLQFLPPER**VLPGCK**DNFWEMGDTGPCGPCTEIHYDRVGNRDAS  
QLVNDDPTCIEIWNLVFIQFNRESGSLKPLPAK**HVDTGMGFERLTSVLQNK**MSNYD TDVFLPIFDAI  
QQATGARPYSGKVGSDDVDRVDMAYRVVADHIR**TL SFAIADGSCPGNEGR**EYVLRRI LRRAVRYGSEVL  
KAQEGFFNGL**VNIVVK**VMGDVFP ELIQNEVRIREI I KEE EASFGKTLLKGIEKFKKAAQEVQGV SCLQ  
DAFVLWDTYGFPLDLTQLMAEERGLW**VDVEGFNNAMDEAR**ER**SRNAQNK**QAGDIIMDADATSALHKKG  
VSVTDDSYKFIWFQDHESVIKAIYTGTEFLGSTTSSNEVGIVLESTSFYAEQGGQIFDTGSLEGTFGSF  
QVSNVQIFGGFVVHIGSLTRAAPRLSVGDKVICVDYDRRT**LIAPNHTCTHMLNFALREVLGNHVDQK**G  
SIVLPEKLRFD FSHGKPVDPALLR**KIESIVNEQIKAELEVS**AK**EATLSEAK**RINGLR**AVFGEVYDPVR**  
**VVAIGR**KVEDLLADPENKEWSSISAELCGGTHISNTKEAK**AFALLSEEGIAK**GVRR**ITAVTTDGAFK**AM  
ELASLLEQEADEISKTEGSLLEKKVASLSRVDSAPIPAAKKFDIRTKISALQDEVKAQKKISEENMQ  
KAVKIATEMAEVAASEGKQFCISR**VDVGLDAAAVR**EAVSK**VLQK**KGLSAMVFSIDETTNK**VVVCAGVAE**  
**KGD**KSQLEVSEWLTAALKPLNGRCGKGGGLATGQGT EGVHLDAAMNLAAEFAQMKLR

## Protein No.: I-76

**Protein name and Species:**

**T-complex protein 1 subunit theta-like OS=Populus trichocarpa**

**GN=POPTRDRAFT\_823706 PE=3 SV=1**

**Accession: tr|B9I5Y4|B9I5Y4\_POPTR**

**Unused ProtScore: 17.33**

**Seq Cov %: 21.8**

**ITRAQ Changed Ratio:**

**117: 115=E3TL: D3TL=1.72**

**116: 114=E5TL: D5TL=1.29**

**Annotated typical Precursor MS Region:**

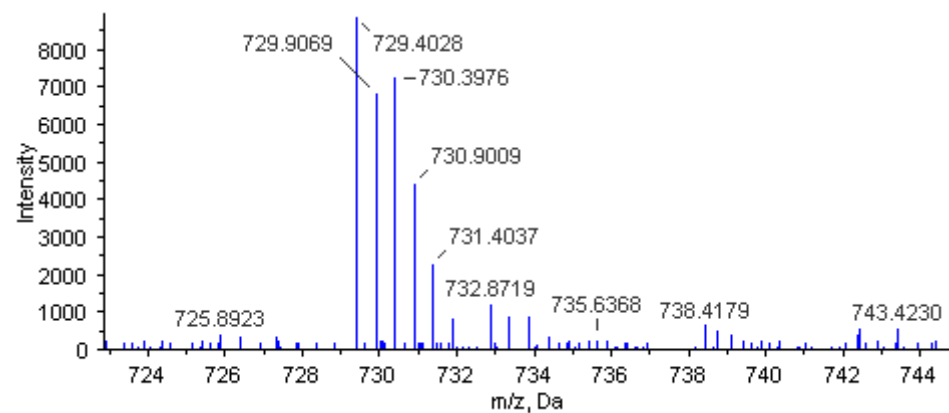

**Sequence Coverage and Matched peptides: in different color**

MGFSMQPYGMQSM LKEGHK **HL**SGLDEAVLK **NI**DACKQLSAITR **TS**LGPNGMNKMVINHLDK **LF**VTNDAA  
**TIV**NELEVQH **PA**AK **IL**VL **LAG**KAQQEEIGDGANLTISFAGEMLQN **AD**ELIR **MGL**HPSEIISGYNKAINKA  
IEILSELVEPGSENMDVRNKEQVICRMKAAVASKQFGQEDILCNLIADACIQVCPK **NP**VNFNVDNVRVA  
KLVGGGLINSSIVRGMVLKGD TVGTIKRVEKAK **VAV**FAGGVDT **SAT**ETKGT **VLI**HSAE **Q**LENYAK **TE**EA  
K**VE**ELIKAVAETGAKVIVSGAAVGEMALHFCERYK **LM**VLKISSK **FEL**RRFCR **TT**GA **V**AILKLSPPSPDD  
LGCVDSISVEEIGGARVTIVR **NE**EGNSVCT **VV**LRGSTD **S**ILDDLER **AV**DD **G**VNTYKAMCRDSRIIPGG  
AATEIELAKRLR **EF**SFK **ET**GLDQYAI **AK**FAESFEMIPKTLAENAGLNAMEIISSLYAEHAGNTK **V**GID  
**LE**EGVFKDVSTTNIWDLYVTKFFALK **YA**ADA **ACT**VLRVDQIIMAKPAGGPRRDAAPGGMEDD

## Protein No.: I-77

Protein name and Species:

Cis-prenyl transferase II (Rubber transferase) OS=Hevea  
brasiliensis GN=Hpt3 PE=2 SV=1

Accession: tr|Q8L3U6|Q8L3U6\_HEVBR

Unused ProtScore: 17.27

Seq Cov %: 42.2

ITRAQ Changed Ratio:

117: 115=E3TL: D3TL=2.23

116: 114=E5TL: D5TL=1.96

Annotated typical Precursor MS Region:

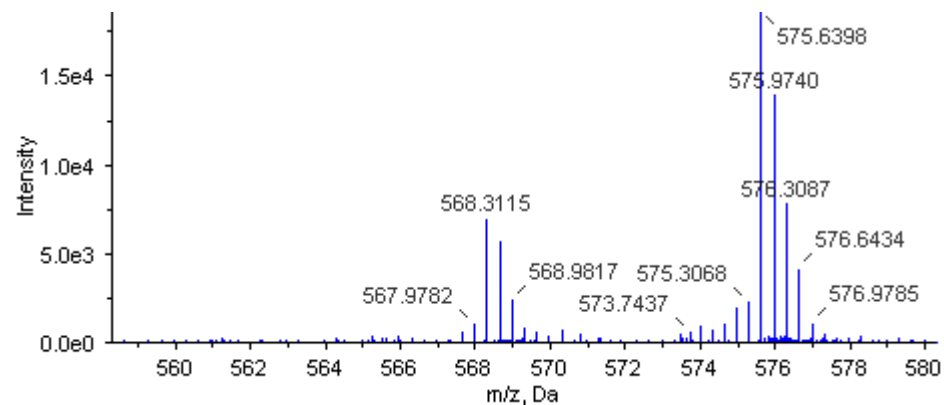

Sequence Coverage and Matched peptides: in different color

MEIYTGQRPSVFRIFGKYMRKGLYSILTQGPPIPTHLAFIMDGNRRFAKKHKMKEAEGYKAGYLALLRTL  
TYCYELGVRVVTIYAFSIDNFRRQPREVQCVMNLMMEKIEEIVEESIMNAYDVGVRIVGNLNLLEDEPI  
RIAAEKIMRATANNRFRVLLIAYAYSSTDEIVHAVEESSKDKLNSNEVCNNGIEAEQEFKEANGTGNSV  
IPVQKTESYSGINLADLEKNTYVNPDPDLIRTSGLSRLSNYLLWQTSNCILYSPFALWPEIGLRHLVW  
TVMNFQRHHSYLEKHKEYLK

## Protein No.: I-80

Protein name and Species:

GTP-binding protein ras-like protein OS=Ricinus communis

GN=RCOM\_1012250 PE=3 SV=1

Accession: tr|B9S943|B9S943\_RICCO

Unused ProtScore: 16.77

Seq Cov %: 39.6

ITRAQ Changed Ratio:

117: 115=E3TL: D3TL=0.47

116: 114=E5TL: D5TL=0.72

Annotated typical Precursor MS Region:

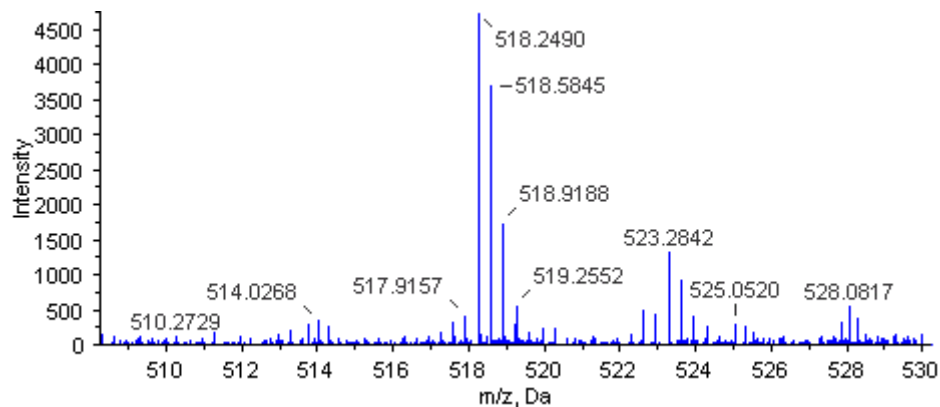

Sequence Coverage and Matched peptides: in different color

MGAYR**ADDDYDYL**FKVVLIGDSGVGK**SNLLSR**FTR**NEFSLESK**STIGVEFATR**SIHVDDKVVKAQIWDT**  
**AGQERYRAITSAYYRGAVGALLVYDVTRHVTFFENVER**WLKELRDHTDANIVIMLVGNKADLRHLRAITTI  
EDATAFAQRQNTFFMETSALSMNVENAFTEVLTTQIYRVVSR**KALDIGDDPAALPR**GQTINVGSRDDVS  
AVKKAGCCSS

## Protein No.: I-83

**Protein name and Species:** cullin-associated NEDD8-dissociated protein 1-like [Vitis vinifera] OS=Vitis vinifera  
GN=VIT\_12s0035g01840 PE=4 SV=1

**Accession:** tr|F6HJZ9|F6HJZ9\_VITVI

**Unused ProtScore:** 16.69

**Seq Cov %:** 7.1

**ITRAQ Changed Ratio:**

**117: 115=E3TL: D3TL=0.23**

**116: 114=E5TL: D5TL=0.66**

**Annotated typical Precursor MS Region:**

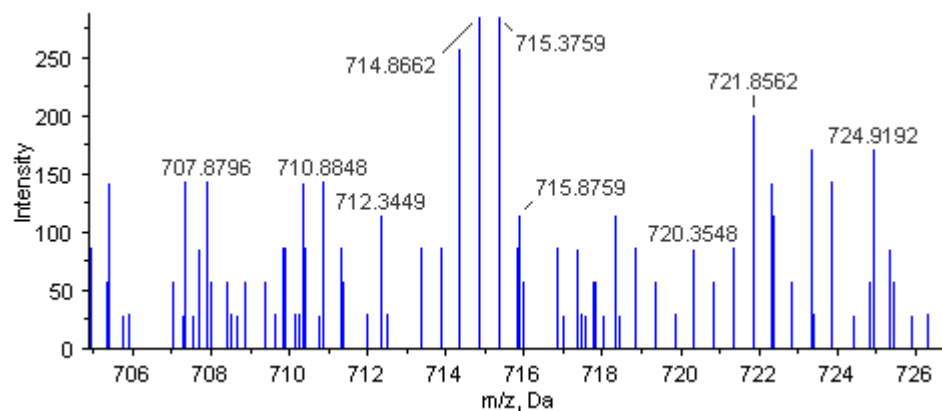

## Sequence Coverage and Matched peptides: in different color

MANLAITSILEKMTGKDKDYRYMATSDLLNELNKEGFR**ADADLE**IKLSNIVLQQLLDDAAGDVSGGLAVKC  
LAPLVKKVSETRLVEMTNKLCDKLLNGKDQHR**DIASIALK**TIVSEVTTSAVAQCVLVSLSPQLIKGITS  
PGMT**TEMK**CECLDILCDVLHKFGNLMATDHELLLGGALL**SQLSSNQASVR**KKTVSCIASLASSLSDDL**LA**  
**KATVEVVRNLR**SKGVKPEMTRTNIQMI GALSRAVGYRFGSHLGDTPVPLINICTSASENDEELREYSLQ  
ALESFLLRCPRDISSYCDEILHLTLEYLSYDPNF<sup>TDNMEED</sup>TDENHEEEEDDESATEYTDDEDVSWKV  
RRAAAKLAALIVSRPEMLSKLYEEACP**LIDRFKEREENVK**MDVFNTF**IELLR**QTGNVTKGQTDMNEL  
SPRWLLKQEVPKIVKSINRQLREKTIKTK**VGAFSVLK**ELVVVLPDCLADHIGSLISGIEKALSDKSSTS  
NLKIEALIFTRLVLASHSPSVFHPYIK**ALSSPVL**SAVGERYYKVTAEALR**VCGELVR**VVRPNIEGYG**FD**  
**FK**PYVHP IYNAIMTRLTNQDQDQEVKECAISCMGLLVSTFGDNLR**AELPACLPVLVDR**MGNEITRLTAV  
KAFAVIATSPLNIDLSCVLEHVIAELTAFLRK**ANRALR**QATLGTLSLIVAYGDKIGSSAYEVIIVELS  
SLISDSDLHMTALALELCCTLMADKRASPNGLAVRNKVLPQALTLIKSSLLQGQALMALQNF<sup>FATLVY</sup>  
SANTSFDALLDSLSSAKPSPQSGGVAKQALCSIAQCVAVLCLAAGDQKCSTTVKMLTDILRDDS**SSNS**  
**AKQHLALLCLGEIGR**RKDLSSHAHIENIVIESFQSPFEEIK**SAASYALGNIAVGNLSKYL**PFILDQIDN  
**QOK**KQY**LLLHSLK**EVIVRQSVDK**AEFQDSSVEK**ILK**LLFNHCESEEEGVR**NVVAECLGKIALIEPAKLV  
PALKVR**TASPAAFTRATVVI**AVKY SIVERPEKIDEI IYPEISSFLMLIKDHRHVRRAAVLALSTAAHN  
KPNLIKGLLPELLPLLYDQTIVKQELIRTVDLGPFKHIVDDGLELRKAAFECVDTLLDSCLDQV**NPSSF**  
**IVPYLK**SGLDDHY**DVK**MPCHLILSKLADKCPSAVLAVLDSLVDPLPKTINFKPKQDAVK**QEVDRNEDMI**  
**RSALRAIASLNRISGGDCSLKFKHLMNEISKSSTLWEKYHSIRNE**



## Protein No.: I-85

Protein name and Species:

Proteasome subunit alpha type OS=Ricinus communis

GN=RCOM\_0711430 PE=3 SV=1

Accession: [tr|B9RR89|B9RR89\\_RICCO](#)

Unused ProtScore: 16.45

Seq Cov %: 40.7

ITRAQ Changed Ratio:

117: 115=E3TL: D3TL=1.71

116: 114=E5TL: D5TL=1.12

Annotated typical Precursor MS Region:

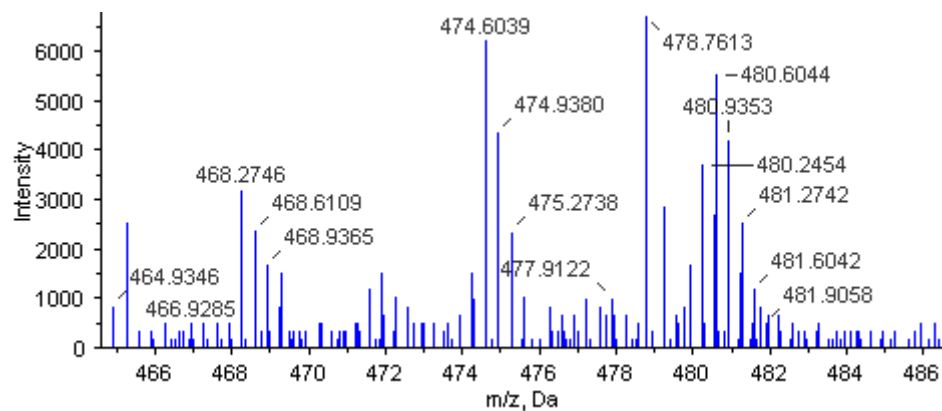

Sequence Coverage and Matched peptides: in different color

MSRGSGGGYDRHITIFSP~~EGRL~~LFQVEYAFKAVKAAAVTSIGV~~RGK~~DSV~~CVVT~~Q~~Q~~KVPDKLLDQTSVTHL  
FPITKYLGLLATGMTADAR~~TLV~~Q~~Q~~ARNEAAEF~~FR~~YGYEMPVDV~~LAR~~WIADK~~SQVYTQ~~HAYMRPLGVIA  
MVLGIDEENGPQLYKCDPAGHFFGHKATSAGLK~~EQEAINFLEK~~KMKNDRAFTYEE~~TVQT~~AI~~SAL~~QSVLQ  
EDFK~~A~~TEIEVGV~~V~~RAD~~DR~~V~~F~~RVL~~STEE~~IDEHLTAISERD

# Protein No.: I-86

**Protein name and Species:**

**Proteasome subunit alpha type OS=Glycine max PE=2 SV=1**

**Accession: tr|C6TKI4|C6TKI4\_SOYBN**

**Unused ProtScore: 16.41**

**Seq Cov %: 37.5**

**ITRAQ Changed Ratio:**

**117: 115=E3TL: D3TL=2.07**

**116: 114=E5TL: D5TL=1.87**

**Annotated typical Precursor MS Region:**

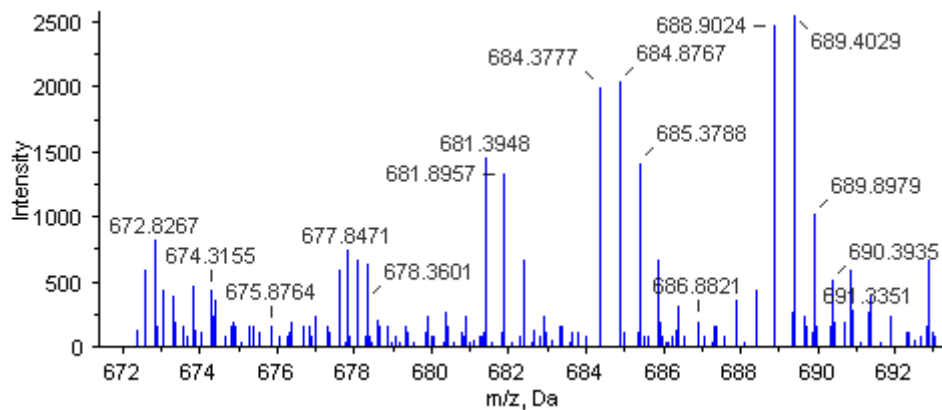

**Sequence Coverage and Matched peptides: in different color**

MGDSQYSFSLTTFSPSGKLVQIEHALTAVGSGQTSLGIKANGVVIATEKLP SILVDETSVQKIQ LST  
PNIGVVYSGMGPDFRVLVRKSRKQAEQYHRLYKEPIPVITQLVREVAAVMQEFTQSGGVRPFGVSLLVAG  
FDDNGPQLYQVDPGSGSYFSWKA SAMGNVSNAKTFLEKRYTDDMELDDAVHTS ILTLK EGFEGQISGKN  
IEIGIIGADKKFRVLTPAEIDDYLA EVE

## Protein No.: I-87

**Protein name and Species:**

**Glucose-6-phosphate isomerase OS=Ricinus communis**

**GN=RCOM\_1594100 PE=3 SV=1**

**Accession: tr|B9R7S8|B9R7S8\_RICCO**

**Unused ProtScore: 16.33**

**Seq Cov %: 16.6**

**ITRAQ Changed Ratio:**

**117: 115=E3TL: D3TL=0.41**

**116: 114=E5TL: D5TL=0.26**

**Annotated typical Precursor MS Region:**

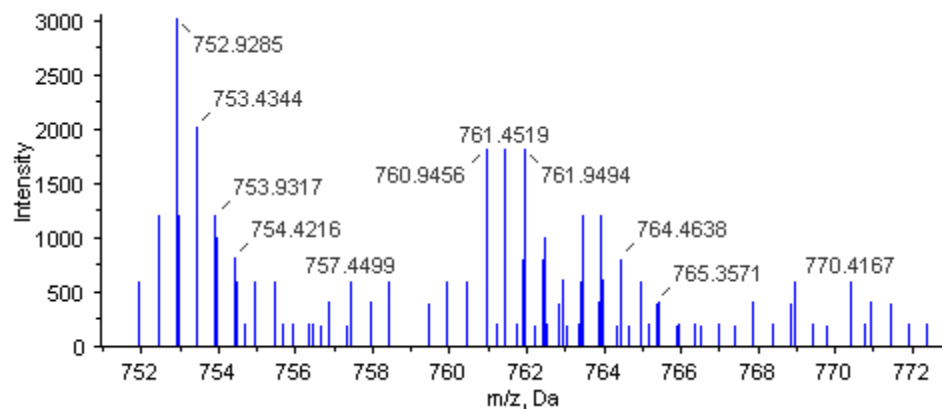

## Sequence Coverage and Matched peptides: in different color

MALSALICDTQPWKDLKAHVEDIKKTHLRNLLGDTERCKSMLEFDGIMLDYSRQTATI**DTLDKLYNLA**  
**EAAHLKEK**IHRMFNGERINSTENR**SVLHVALR**APRDAIVNSDGK**NVVPDVWNVLDK**IKEFSERVRNGSW  
VGATGKPLTDVIAIGIGGSFLGPLFVHTALQTDP**EASK**SAKGR**QLRFLANVDPIDVAR**NIAGLSPETTL  
VVVVS**KFTTTAETMLNAR**TLRAWISR**ELGPSAVAK**HMVAVSTNLTLEKFGIDPNNAFAFWDWVGGRYS  
VCSAVGVLPL**SLQYGF****SIVEK**FLKGASSIDQHFSSAPFEKNI PVLLGLLSVWNVSVLGYPAR**AILPYSQ**  
**ALEKLAPHIQVSMESNGK**GVSMGVPPLPFETGEIDFGEPGTNGQHSF**YQLIHQGRVIPCDFIGVVK**SQ  
QPVYLEGEVVNNHDELM SNFFAQP DAL**AYGK**TAEQLQK**ENVPQH**LIPHKTFSGNRPSVSILLSSLDAYK  
**IGQLLAIYEHR**VAVQGFVWGINSFDQWV ELGKSLATQVRKQLNASR**TKGEPVEGFNFSTTTMLTRYLE**  
**ETSEVPAKPQTLLPRI**

## Protein No.: I-89

**Protein name and Species:**

**26S proteasome regulatory subunit S3, putative OS=Ricinus  
communis GN=RCOM\_0977830 PE=4 SV=1**

**Accession: tr|B9S5K6|B9S5K6\_RICCO**

**Unused ProtScore: 16.31**

**Seq Cov %: 19.8**

**ITRAQ Changed Ratio:**

**117: 115=E3TL: D3TL=2.11**

**116: 114=E5TL: D5TL=1.37**

**Annotated typical Precursor MS Region:**

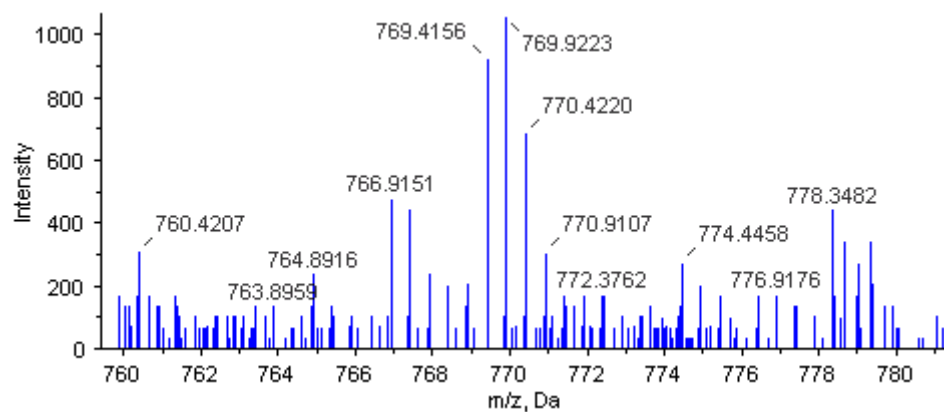

## Sequence Coverage and Matched peptides: in different color

MTQDVEMKEVPAAAAAPSNSTTSSSPSTLQHLK**EIASLIETGAYAR**EVRRIVRAVRLTMALRRKLLKAQL  
LSAFLNSILTPGSDPYTRLSSFLPKEDDHEMEVDTATSVTQAPAKHPLPELEMYCYLLVLIYLIDQKKY  
NEAKACSTACIARLKNLNRRTVDVLAASRLYFYYSLSYELTGDLAEIRGNLLALHRIATLRHDELGQETL  
LNLLLR**NYLHYNLYDQAEK**LRSKAPR**FEAHSNQQFCRYLFYLGK**IR**TIQLEYTDAK**ESLLQAARKSPVA  
ALGFRVQCNK**WAIIVR**LLLGEIPER**TVFMQK**GMEKALRPYFELTNAVR**IGDLELEFK**SVAEKFSTIFSAD  
RTHNLIVRLRHNVIR**TGLRNISISYSRISLADVAK**KLR**LDSANPVADAESIVAK**AIRDGAIDATLDHAN  
GWMVSK**ETGDIYSTNEPQIAFNSR****IAFCLNMHNEAVR**ALRFPPNSHKEKESAEKRRERQQEQELAK**HI**  
**AEEDDDEF**

# Protein No.: I-95

**Protein name and Species:**

**UDP-D-glucose pyrophosphorylase OS=Gossypium hirsutum**

**PE=2 SV=1**

**Accession: tr|D2D2Z1|D2D2Z1\_GOSHI**

**Unused ProtScore: 16.17**

**Seq Cov %: 27.3**

**ITRAQ Changed Ratio:**

**117: 115=E3TL: D3TL=0.47**

**116: 114=E5TL: D5TL=0.74**

**Annotated typical Precursor MS Region:**

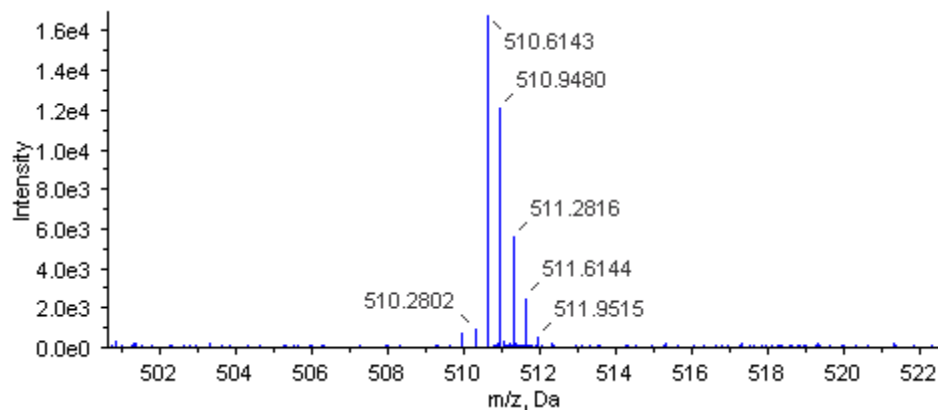

**Sequence Coverage and Matched peptides: in different color**

MEKLEHLKSAVAALSEISENEKNGFINLVSRYLSGEAQHIEWSKIQTPTDEVVVPYDTLSPSPDDPAET  
KLLDKLVVLKLNGLGTTMGCTGPKSVIEVRNGLTFLDLIVIQIENLNSKYGCNVPLVLMNSFNTHDD  
TLKIVDKYSNIEIHTFNQSQYPRLVVEDFAPLPSKGQHGKDGWYPPGHGDVFP SLMNSGKLD AFLSQ  
GKEYVVFVANS DNLGAI VDMKILNHLVQNKNEYCMEVTPKTLADVKGGTLISYEGKVQLLEIAQVPDEHV  
NEFKSIEKFKIFNTNNLWVNLNAIKRLVEADALKMEIIPNPKEVNGIKVLQLETAAGAAIRFFDHAIGI  
NVPRSRFLPVKATSDLLLVQSDLYTLVDGFVIRNKDRANPTNPSIELGPEFKKVGNFLSRFKSIPSIIE  
LDSLKVTGDVWFGAGIVLKGKVSIAAKPGVKLEIPDGA VIEKKEINVPEDI

## Protein No.: I-98

**Protein name and Species:**

**Eukaryotic translation initiation factor 2c, putative OS=Ricinus  
communis GN=RCOM\_0605410 PE=4 SV=1**

**Accession: tr|B9SJV6|B9SJV6\_RICCO**

**Unused ProtScore: 15.62**

**Seq Cov %: 14.3**

**ITRAQ Changed Ratio:**

**117: 115=E3TL: D3TL=0.61**

**116: 114=E5TL: D5TL=0.59**

**Annotated typical Precursor MS Region:**

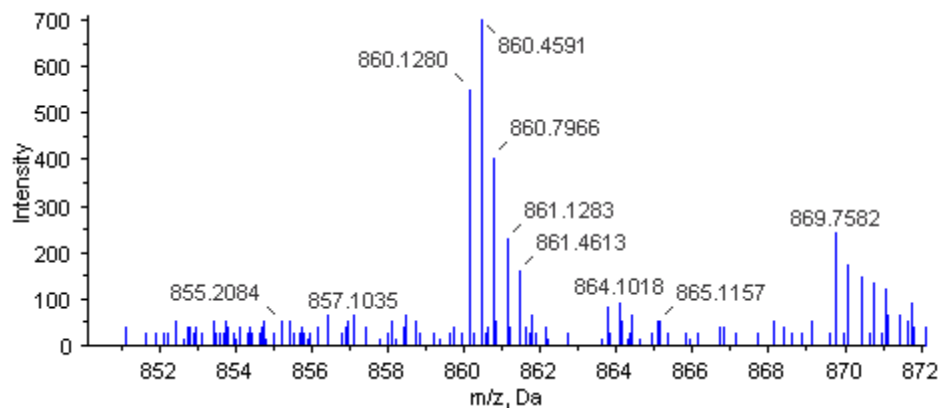



## Sequence Coverage and Matched peptides: in different color

MVRKRRTTEAPASGGESSEPHEAASGGSQRPYERNAPPQQGPGGPYQGGRSWGPPQSQQGG**RGGGGGR**SG  
GMSQQQQYGGGPEYQGRGR**GPPQQGGRGGYGGGR**SSSNRGGPPSVGPPSRPPVPELHQATLAPYQAGVSP  
QLMPSEGSSSSGPPPEPSPVVVAQQMQELSIQQEVSSSQPIQAPPPSSKSMR**FPLRP**GKGSTGIR**CIVKA**  
NHFFAELPDKDLHQYDVTITPEVTSRQVNR**AVMEQLVK**LYRESHLGK**RLPAYDGR****KSLYTAGPLPFISK**  
EFKITLIDEDDGGSGGQRREREFRRVVIKLAARADLHHLGLFLQGR**QADAPQEALQVLDIVLR**ELPTTRYC  
PVGR**SFYSPDLGR**RQPLGEGLESWRGFYQSIRPTQMGLSLNIDMSSTAFIEPLPVIDFVNQLLNR**DVSS**  
**RPLSDADR**VKIKKALRGVKVEVTHRGNMRRKYRISGLTSQATR**ELTFP**VDERGTMKSVVEYFYETYGFV  
IQHTQWPCLQVGNQQRPN**YLPMEVCK**VVEG**QRYSK**RLNERQITALLKVTTCQRPQERERDIMQTVHNNAY  
GNDPYAKE**FGIKISEK**LASVEARILPAPWLKYHDTGREKDCLPQVGQWNMMNKKMVNGGTVNNWICINF  
SRNVQDSVARGFCYELAQMCI**ISGMAFNPEPVLPPVSARPEQVEK**VLKTRYHDAMTKLQQGKELDLLIV  
ILPDNNGSLYGELKR**ICETDLGLVSQCCLTK****HVFR**MNKQYLANVALK**INVK**VGGRNTVLVDALSRRIPL  
VSDRPTIIFGADVTHPHPGEDSSPSIAAVVASQDW**PEVTKYAGLVCAQHRQELIQDLFK**EWQDPVGRGR  
VTGMIK**ELLISFR**RATGQKPQR**IIFYR**DGVSEGFYQVLLYELDAIRK**ACASLEPNYQPPVTFVVVQK**  
RHHTRLFANNHNRNAVDSGNILPGTVVDSKICHPTEFDYLCSHAGIQGTSRPAHYHVLWDENK**FTA**  
**DGLQSLTNNLCYTYAR**CTR**SVSIVPPAYYAH****LAAFR**ARFYMEPETSDSGSMTSGPVGGRGGMGGGAGAR  
STRGPA**AASA**AVRPL**PALK**ENVKRVMFYC

## Protein No.: I-99

**Protein name and Species:**

**Coatomer          subunit          beta          OS=Vitis          vinifera**

**GN=VIT\_04s0008g02320 PE=3 SV=1**

**Accession: tr|A5AHP0|A5AHP0\_VITVI**

**Unused ProtScore:          15.49**

**Seq Cov %: 11.9**

**ITRAQ Changed Ratio:**

**117: 115=E3TL: D3TL=1.80**

**116: 114=E5TL: D5TL=1.49**

**Annotated typical Precursor MS Region:**

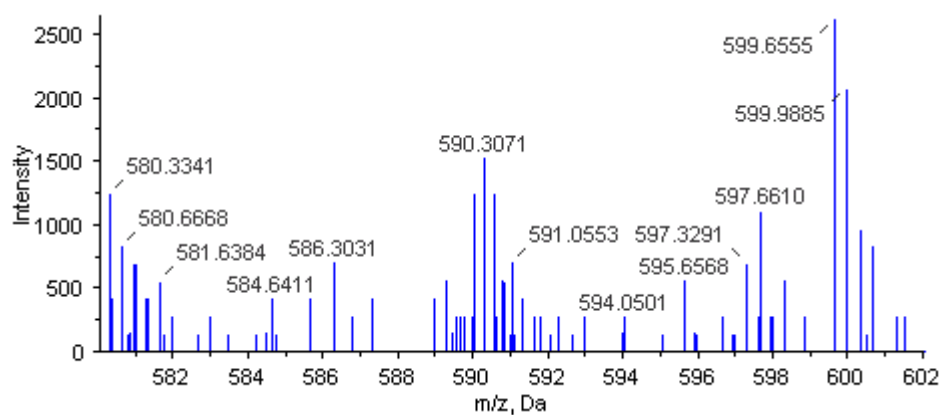

## Sequence Coverage and Matched peptides: in different color

MEKSCSLLIYFDK**GTPAIAANEIK**EALEGNDDYAKI**EAMK**KAIMLLLNGETLPQLFITIVRYVLPSEDHT  
VQKLLLLYLEIIEK**TDAK**GK**VMP**EMLI**CQNLR****NNLQHPNEYIR**GVTLRFLCRLNEAEIIEPLIPSVLQ  
NLEHRHPPFIRRNAILAVMSIYK**LPQGEQLLVD**AP**EMIEK**VLSTEQDPSAKR**NAFLMLFTCAQDRAINYL**  
**LTHVDR**VPEWGELLQMVV**LELIR**KVCR**TNR**GEK**GKYIKIIIS**LLNAPSTAVIYECAGTLVSLSSAPTAI  
R**AAANTYCQLLLSQSDNNVK**LIVLDRLNELKSSHREIMVDMIMDVLR**ALSSPNLDIRR**KTLDIVLELIT  
PR**NINEVVLTLK**KEVVKTQSGELEKNGEYR**QMLIQAIHSCAIK**FPEVASTVVHLLMDFLGDSNVASAI  
VVVFVR**EIIETNPKLRVSIITRLLD**TFY**QIR**AARVCSALWIIGEYCLSLSEVESGITTIKQCLGDLPF  
FSVSEEGEASDSSKKVQV**NATT**VSSRRPAVLADGTYATQSAASETAFSPPTLVQGSLSGNLRSLLLT  
GDFFLGAVVACTLTKLVLRL**EEVQPSK**AEVNKVSSQALLIMVSMQLGQSSVLPHPIDNDSYDRIVLCI  
RLLCNTGDDIRKIWLQSCRQSYVKMLADKQLRETEEIKAKAQISYAQPDDLIDFYHLKSRK**GMSQLELE**  
**DEVQDDLKRATGEFIK**DGDDANKLNRILQLTGFSDPVYAEAYVTVHHDIVLDVTVINRTKETLQNLCL  
ELATMGDLK**LIVDRPQNYTLAP**ESSKQIKANIKVSSSTETGVIFGNIVYETSNVHERMVVVLNDIHIDIMD  
YISPAVCTDVAFRTMWA**EFEWENKVAVNTVLQNEKEFLEHIK**STNMKCLTASSALDGDGCGFLAANLYA  
KSVFGEDALVNISIEKQADGKLSGYIRIRSK**TQGI**ALS**SLGDK**ITLKQKGG

# Protein No.: I-102

## Protein name and Species:

Nucleoredoxin, putative OS=Ricinus communis

GN=RCOM\_0528050 PE=4 SV=1

Accession: tr|B9SH99|B9SH99\_RICCO

Unused ProtScore: 15.18

Seq Cov %: 18.4

## ITRAQ Changed Ratio:

117: 115=E3TL: D3TL=0.42

116: 114=E5TL: D5TL=0.59

## Annotated typical Precursor MS Region:

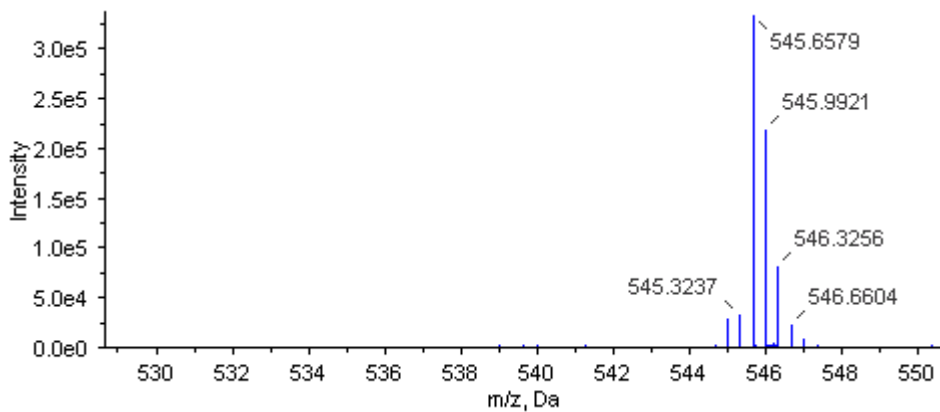

## Sequence Coverage and Matched peptides: in different color

MADDPVIDVSHDLL**SLLSDDDRDFLIR**SNGDQVK**ISNLV**GKIVGLYFSGSWCGPCRHFTPNLVQVY**EE**  
**SLK**GDFFEVVFISSDRDAESFDAYFSKMPWLAIPFSDQETCKHLKDLFKVRGIPNLVFLDADGKVS CDQG  
VRFIR**EYGAEGYPFTPER**VEYFRQEEENAK**KNQTLSSILVSSSR**DFLISKDGTK**IPVSELE**GKMVGLYF  
SVHSHRLCLDFTPRLEEYVKLKEKGEKFEVVLISMDYDENNF**KQGLE**TPWLAL**PFEDK**SRERLARYF  
EL**SALPTLVIIGEDGK**TLNK**NVAELIEGHGIQAYPFTPEK**L**VELAEIEK**AR**LEAQTLESVLVHGDK**DFV  
IE**ESGSKVPVSELVGNILLYFS**AK**WCPPCRAFLPKLIEAYHEIK**AK**DNAFEIIFISSDR**DQSSFDEFY  
TEMPWLALPFGDDRKTILQRKFKIK**GIPAAIAISPT**GKTLTKEAREHITAYGADAYPFNEDHLKQLNDK  
QEEIAGWPEKVRHELHPEHELVRMKRNGYGCDGCKEAGSGWSFYCKKCDFDLHPKCALKKEENGEKVK  
K

# Protein No.: I-106

Protein name and Species:

L-lactate dehydrogenase OS=Ricinus communis

GN=RCOM\_0540790 PE=3 SV=1

Accession: [tr|B9SIT3|B9SIT3\\_RICCO](#)

Unused ProtScore: 14.96

Seq Cov %: 32.3

ITRAQ Changed Ratio:

117: 115=E3TL: D3TL=0.44

116: 114=E5TL: D5TL=0.76

Annotated typical Precursor MS Region:

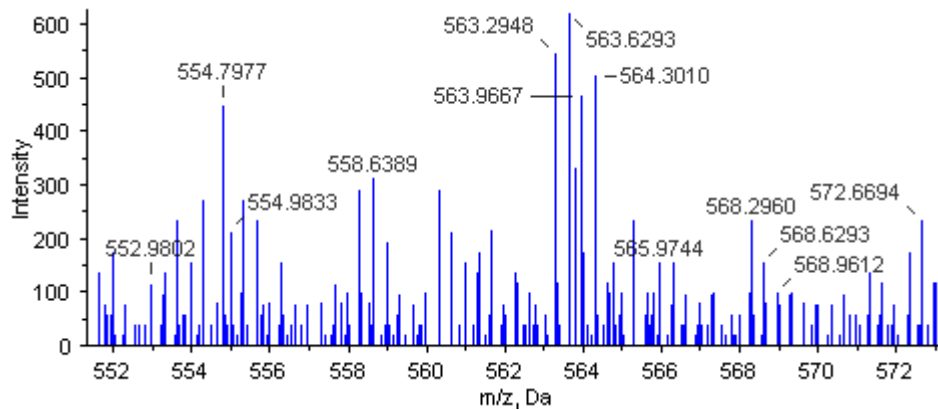

Sequence Coverage and Matched peptides: in different color

MQQSSSAASLGPGLDLSQVFFKPIHNTSPPSPTKRHTKISVIGTGNVGMIAIAQTILTQDLADELALVD  
VNPKNLR**GEMLDLQHAAAF**LPR**TKILASPDYSVTIGSDLCIVTAGARQIPGESR**L**NLLQR**NVTLFKNI I  
PPLAKYSPDSILMIVSNPVDILTFIAWK**LSGFPSNR**V**VGSGTNL**SSRFRFLIADHLDVNAQDVQAYIV  
GEHGDSSVALWSSISVGGVPILSFLEKQDIAYEK**ETLENIHKAVVDSAYEVISLKGYSWAIGYSAANL**  
**ARSLLRDQRK**I**HPVSVLAKGFY**GIDGGDVFLSLPAQLGRGGV**LGVTNVHLTEEEAQR**LRDSAKT**LLE**VQ  
SQLGI

# Protein No.: I-108

**Protein name and Species:**

**26S proteasome regulatory subunit 4 homolog A [Vitis vinifera]**

**OS=Vitis vinifera GN=VIT\_07s0005g05160 PE=3 SV=1**

**Accession: tr|A5BEF3|A5BEF3\_VITVI**

**Unused ProtScore: 14.87**

**Seq Cov %: 27.6**

**ITRAQ Changed Ratio:**

**117: 115=E3TL: D3TL=1.51**

**116: 114=E5TL: D5TL=1.47**

**Annotated typical Precursor MS Region:**

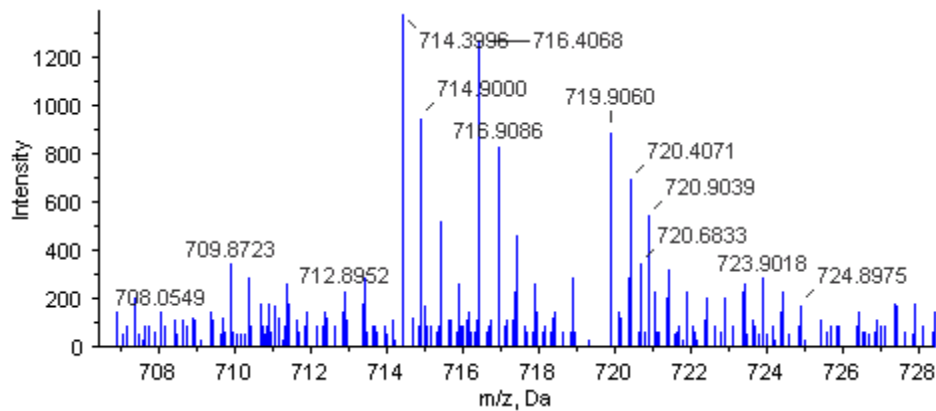

**Sequence Coverage and Matched peptides: in different color**

MGQASGGLNRQGLPGDRKNDGDKKEK**KFEPAAPPAR**VGRKQQRKQKGPEAAARLPTVTPLSKCKLRLLLK  
LERIKDYLLMEEEFVSNQERLKPQEEKTEEDRSKVDDLRGSPMSVGNLEELIDENHAIVSSSVGPEYYV  
GILS**FVDK**DQLEPGCAILMHNKVLVSVVGLLQDEVDPMVSVMKVEK**APLESYADIGGLDAQIQEIK**EAVE  
LPLTHPELYED**IGIK**PPK**GVILYGEPTGK****TLLAKAVANSTSATFLRVVGSSELIQK**YLGDPKLVRELF  
RVADDLSPSIVFIDEIDAVG**TK**RYDAHSGGEREIQ**RTMLELLNQLDGFDSR**GDVK**VILATNR****IESL**DPA  
**LLRPGR**IDRK**IEFPL**DIK**T**RRR**IFQIHTSRMTLADDVNLEEFVMTKDEFSGADIK**AICTEAGLLALRE  
RRMKVTHVDFKKAKEKVMFKK**KEGVPEGLYM**

## Protein No.: I-109

**Protein name and Species:**

**Chaperonin containing t-complex protein 1, eta subunit, teph,  
putative OS=Ricinus communis GN=RCOM\_0395630 PE=3  
SV=1**

**Accession: tr|B9SS36|B9SS36\_RICCO**

**Unused ProtScore: 14.75**

**Seq Cov %: 17.6**

**ITRAQ Changed Ratio:**

**117: 115=E3TL: D3TL=0.55**

**116: 114=E5TL: D5TL=0.72**

**Annotated typical Precursor MS Region:**

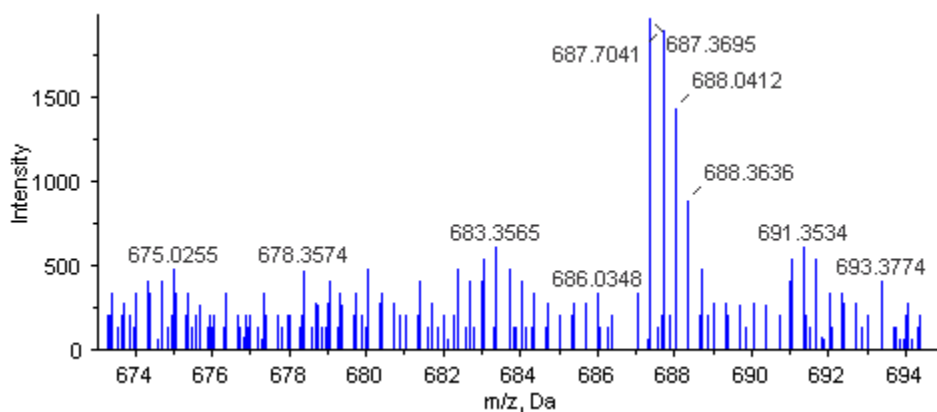

## Sequence Coverage and Matched peptides: in different color

MAAMLQPQIILLKEGTDTSQGKAQLVSNINACTAVADVVR<sup>T</sup>TLGPRGMDKLIHDDKGNVTISNDGATIM  
KLLDIVHPAAKILVDIAKSQDSEVGDGTTTVVLLAAEFLKEAKPFIEDGVHSQNLIRSYRTACNLALEK  
IRELAFSIEGKSIEEKKSLLAKCASTTSSKLIIGGEKEFFAQMVVDAVIAIGNEDRLNMIGIKKVPGGN  
MRDSFLVNGVAFKKTF<sup>S</sup>YAGFEQ<sup>Q</sup>PKKFVNPKLLLLNIELELKSEKENAEIRLSDPSEYQSI<sup>V</sup>DAEWNI  
IYDKLDKCVQSGAKVVL<sup>S</sup>R<sup>L</sup>LAIGDLATQYFADR<sup>D</sup>IFCAGRVAEEDLQRVAAATGGTVQTTVNNIIDEVL  
GTCEIFEEKQVGNERNIFSGCPSGKTATIVLRGGADQFIEEAERSLHDAIMIVRRAMK<sup>N</sup>STVVAGGGA  
IDMEISRFLRQHARTIAGKSQLFINSYAKALEV<sup>I</sup>PRQLCDNAGFDATDVLNKL<sup>R</sup>QKHALPSGEGAPFGV  
DINTGGIADSFANFVWEPVVKINAINAATEAACLILSVDETVKNPK<sup>S</sup>ESAQGEAAAGAMGGRGRGGAA  
FRGRGRGMRRR



## Protein No.: I-112

**Protein name and Species:**

**Lactoylglutathione lyase, putative OS=Ricinus communis**

**GN=RCOM\_0904280 PE=4 SV=1**

**Accession: tr|B9RXK1|B9RXK1\_RICCO**

**Unused ProtScore: 14.47**

**Seq Cov %: 30**

**ITRAQ Changed Ratio:**

**117: 115=E3TL: D3TL=0.08**

**116: 114=E5TL: D5TL=0.10**

**Annotated typical Precursor MS Region:**

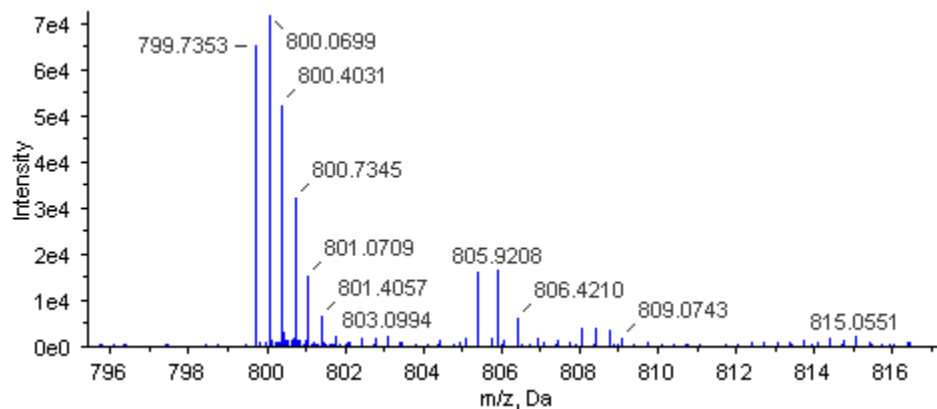

**Sequence Coverage and Matched peptides: in different color**

MAAEATAPNADVLEWPKKDK**RRL**LHAVYR**VGD**LDR**T**IK**FY**TECFGMKLLRKRDIPEEKYSNAFLGFGPE  
ETNFVVELTYNYGVTSYDIGTGFGHFAIATQDVYKLVVEEVL**AK**GGAVTREP**GP**VK**GG**TTVIAFVKDPDG  
**Y**IFELIQRGPTPEPL**CQ**VMLR**VGD**LDRSIR**FY**EKALGMKLLRKYDKPEYKYTLAMMGYADEYETTIVLEL  
TYNYGVTEYTK**GN**AYA**Q**VA**I**STDDVYK**SA**EVVNLV**TQ**ELGGKITR**Q**PGPI**P**GLNTKITSFLDPDG**W**KTK  
RKRR

# Protein No.: I-115

**Protein name and Species:**

**Glucose 4-6-dehydratase, putative OS=Ricinus communis**

**GN=RCOM\_1185970 PE=4 SV=1**

**Accession: tr|B9SN65|B9SN65\_RICCO**

**Unused ProtScore: 14.31**

**Seq Cov %: 28.7**

**ITRAQ Changed Ratio:**

**117: 115=E3TL: D3TL=3.10**

**116: 114=E5TL: D5TL=1.52**

**Annotated typical Precursor MS Region:**

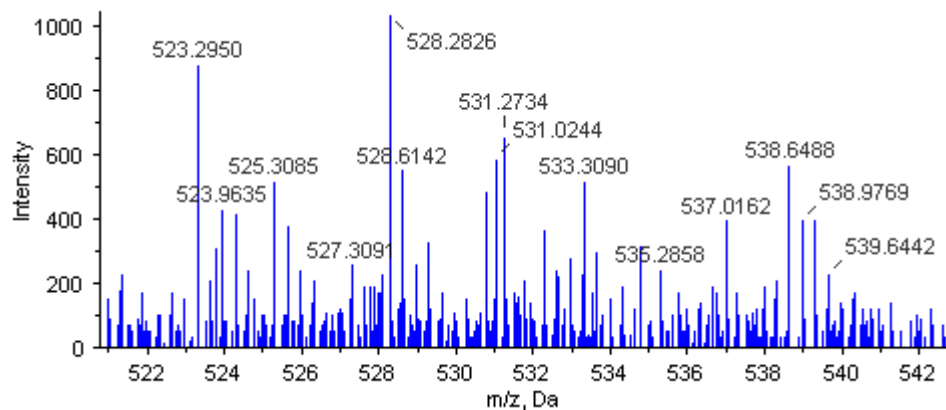

**Sequence Coverage and Matched peptides: in different color**

MANR**V****D****L****D****G****R**PIKEMTIC**M****I****G****A****G****G****F****I****G****S****H****L****C****E****K**ILNETPHK**I****L****A****L****D****V****Y****N****D****K**IKHLLLEPDSLPLWAGRIQF  
HRINIKHDSR**L****E****G****L****I****K****M****A****D****L****T****I****N****L****A****A****I****C****T****P****A****D****Y****N****T****R**PLDTIYSNFI**D****A****L****P****V****V****K**YCSENNKRLIHFSTXX  
SYFSWDPAYYILKEDESPCIFGSI**E****K****Q****R****S****Y****A****C****A****K****Q****L****I****E****R****L****I****Y****A****E****G****A****E****N****G****L****E****F****T****I****V****R****P****F****N****W****I****G****P****R****M****D****F****I**  
**P****G****I****D****G****P****S****E****G****V****P****R****V****L****A****C****F****S****N****A****L****L****R****G****E****P****L****K****L****V****D****G****G****Q****S****Q****R****T****F****V****Y****I****K****D****A****I****E****A****V****L****L****M****I****E****N****P****A****R****A****N****G****H****I****F****N****V****G****N****P**  
**H****N****E****V****T****V****K****Q****L****A****E****M****M****T****E****V****Y****S****K****V****S****G****E****P****V****L****E****V****P****T****V****D****I****S****S****K****E****F****Y****G****E****G****Y****D****D****S****D****K****R****I****P****D****M****T****I****I****N****R****Q****L****G****W****N****P****K****T****S****L****W**  
DLLESTLTYQHR**T****Y****A****E****A****I****K****K****V****L****A****K****P****T****S**

# Protein No.: I-117

**Protein name and Species:**

**Regulator of ribonuclease activity A OS=Populus trichocarpa**

**GN=POPTRDRAFT\_738638 PE=2 SV=1**

**Accession: tr|A9PFQ6|A9PFQ6\_POPTR**

**Unused ProtScore: 14.13**

**Seq Cov %: 42.8**

**ITRAQ Changed Ratio:**

**117: 115=E3TL: D3TL=0.30**

**116: 114=E5TL: D5TL=0.37**

**Annotated typical Precursor MS Region:**

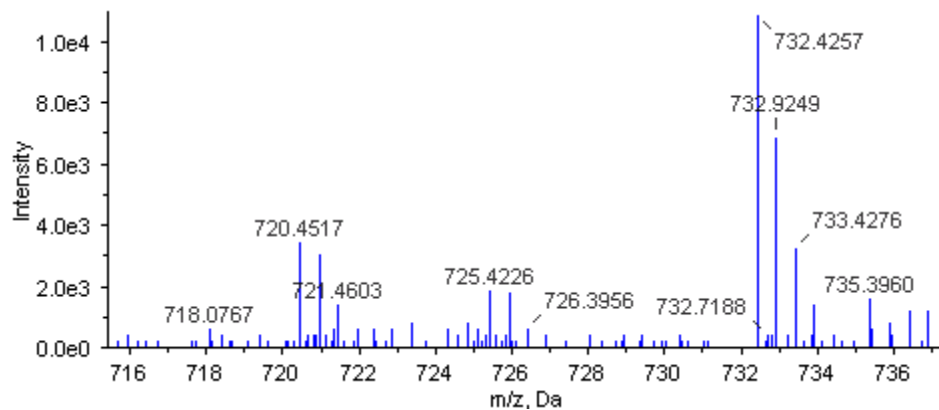

**Sequence Coverage and Matched peptides: in different color**

MALVTTAEVCDANPQLIVSGELR**ALQPIFQIYGR**RQVFSGPVVTLKVFEDNVLIR**EFLEEK**GNGRVLVV  
**DGGGSLR**CAAILGGNPVVQAQNNGWAGIVVNGCIR**DVDEIMGCDIGVR**ALASHPMKANKKGI**GEK****HVPIT**  
**IGGTRISDGEWLYADTDGILISR**TELA

## Protein No.: I-119

**Protein name and Species:**

**Hydroxymethylglutaryl coenzyme A reductase OS=Hevea  
brasiliensis PE=2 SV=1**

**Accession: tr|Q547W6|Q547W6\_HEVBR**

**Unused ProtScore: 14.02**

**Seq Cov %: 22.1**

**ITRAQ Changed Ratio:**

**117: 115=E3TL: D3TL=0.22**

**116: 114=E5TL: D5TL=0.28**

**Annotated typical Precursor MS Region:**

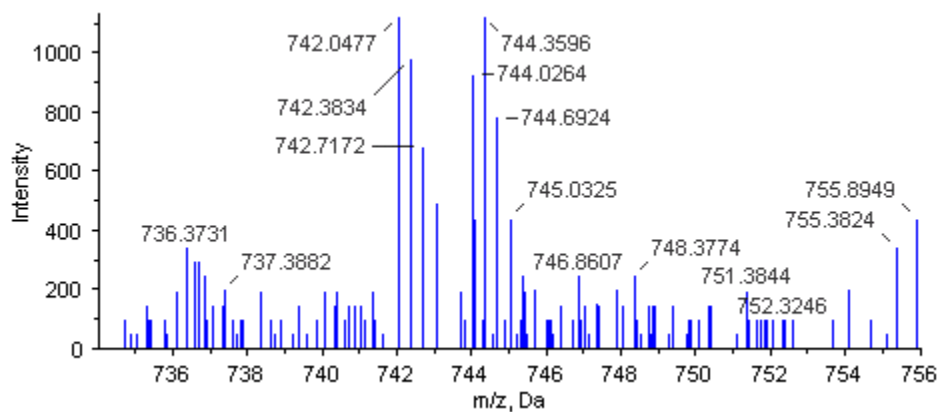

## Sequence Coverage and Matched peptides: in different color

MDTTGRLHHRKHATPVEDRSPTTPKASDALPLPLYLTNAVFFTLFFSVAYYLLHRWRDKIRNSTPLHIV  
TLSEIVAIIVSLIASFIYLLGFFGIDFVQSFIARASHDVWDLEDTPNYLIDEDHR**LVTCPANISTKTT**  
**IIAAPTKLPTSEPLIAPLVSEEDMIVNSVVDGKIPSYLESK**LGDCKRAAAIRREALQRMTRRSLEGL  
PVEGFDYESILGQCCEMPVGYVQIPVGIAGPLLLNGR**EYSVPMATTEGCLVASTNR**GCK**AIYLSGGATS**  
**VLLKDGMTR**APVVRFASATR**AAELK**FFLEDPDNFDTLAVVFNKSSRFARLQGIK**CSIAGK**NLYIR**FSCS**  
**TGDAMGMNVSK**GVQNVLEFLQSDFSMDVIGISGNFCSDKKPAAVNWIEGRGKSVVCEAIKEEVVKK  
VLK**TNVALVELNMLKNLAGSAVAGALGGFNAH**AGNIVSAIF IATGQDPAQNVESH C ITMMEAVNDGK  
DLHISVTMP SIEVGT VGGGTQLASQSACLNLLGVKGANKE SPGSNSRLLAAI VAGSVLAGELSLMSAIA  
AGQLVKSHMKYNRSSKDMSKAAS

## Protein No.: I-122

**Protein name and Species:**

**villin-2 OS=Populus trichocarpa GN=POPTRDRAFT\_576360**

**PE=4 SV=1**

**Accession: [tr|B9II82|B9II82\\_POPTR](#)**

**Unused ProtScore: 13.95**

**Seq Cov %: 13.5**

**ITRAQ Changed Ratio:**

**117: 115=E3TL: D3TL=0.58**

**116: 114=E5TL: D5TL=1.19**

**Annotated typical Precursor MS Region:**

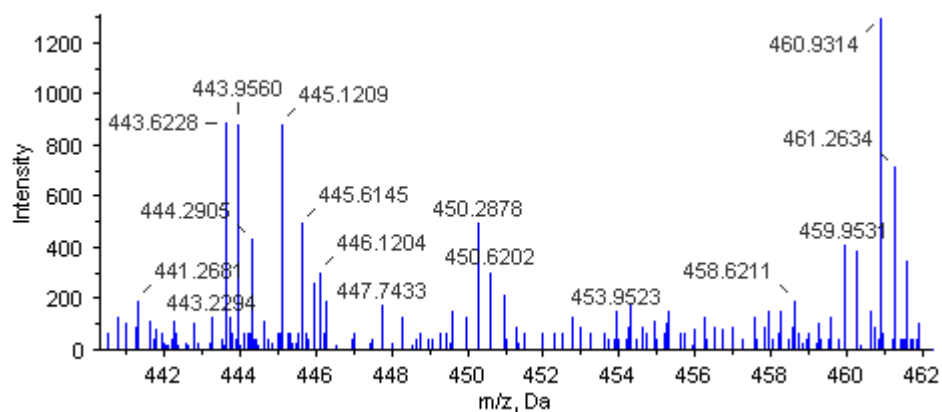

## Sequence Coverage and Matched peptides: in different color

MSSSAKALDPAFQGVGQRPGETE IWR IENFQPVPLPKSDHGK F YMGDSYIVLQTTTGKGGAYLYDIHFWI  
GK DTSQDEAGTAAIKTVELDAVLGGR AVQHR ELQHESDK FLSYFKPCIIPLEGGVATGFKKVEEEAFE  
IRLYVCRGKRVRRLKQVPFARSSLNHDDVFI LDTEKK IYQFNGANSNIQER GK ALEVIQFLKEK YHEGT  
CDVAIVDDGKLDTESDSGEFWLFGGFAP I GKK VANEDDI IPETTPAK LYSITDGEVK IVEGELSKGLL  
ENNKCYLLDCGAEIFVWVGRVTQVEERK AASQAEEFVASQNRPK TTQLTRLIQGYETRSFKTNFDSWP  
AGSAAPGAEEGRGK VAALLKQQGVGLK GMTK SAPVNEEVPPILLEGGGK MEVWCINGSSKTPLPKEDVGK  
FYSGDCYI ILYTYHSGDRKEDYLLCCWFGNDSSEIHGHP IQEDQKMAAR LANTMSNSLK GRPVQGRIFQ  
GKEPPQFVALFQPIVILKGGLSGGYKKSIAEK GLSDETYTADSVLFR ISGTSVHNDKAVQVDAVATSL  
NSAECFLQSGSSIFTWHGNQSTFEQQQLAAK LAEFLKPGVALK HAKEGTESSAFWFALGGK QSYTSKK  
FSPETVR DPHLFTFSFNK GKFQVEEVYNFSQDDLLETEDILILDTHAEVFWVWGQYVDPKEKQNVFDIGQ  
KYIEMAVSLDGLSPNVPLYKVTEGNEPSFFTYYFSWDLTK ATVQNSFQK KAALLFGLGHHVVEERSNG  
NQGGPTQR ASALAALSSAFNPSSGK SLLDRSNGSNQGGTTQR ASALAALSSAFNSSPGSK TTASRPSG  
TGQGSQRRAAVAALSSVLTAEEKKQTPETSPSRSPPESETNLPEGSEGV AEVK EMEETASVSESNGGEDSE  
RKQDTEHGESDDGNGQSTFC YDQLKAHSDNPVK GIDFKRREAYLSDEEFQTIFGVTKEAFYKMPKWKQD  
MQKKKFDLF

## Protein No.: I-125

**Protein name and Species:**

**Cysteine synthase OS=Vitis vinifera GN=VIT\_14s0030g01560**

**PE=3 SV=1**

**Accession: tr|F6HTU8|F6HTU8\_VITVI**

**Unused ProtScore: 13.43**

**Seq Cov %: 11.8**

**ITRAQ Changed Ratio:**

**117: 115=E3TL: D3TL=0.17**

**116: 114=E5TL: D5TL=0.40**

**Annotated typical Precursor MS Region:**

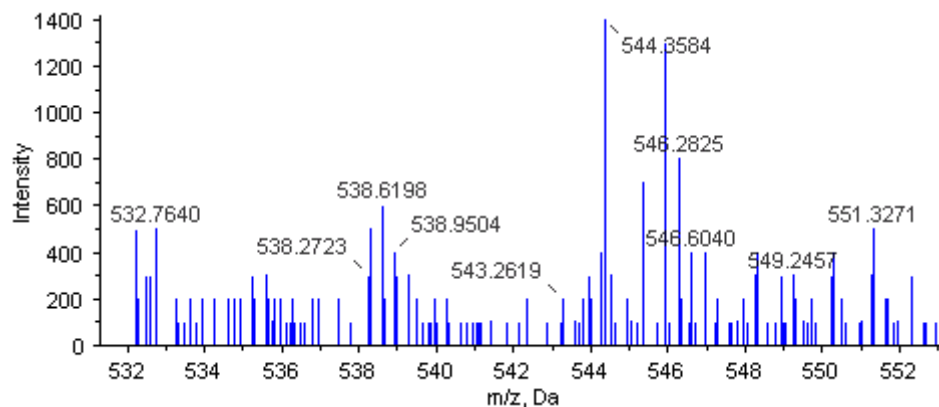



## Sequence Coverage and Matched peptides: in different color

MIQKKSELIL IYNIKLGNLILNL ILFVRFIQEKQFAILPSLFIKVVSVETVGDVQKPQNRKKKQRIKKG  
DLVVGISGDLCEMAEEKCFIAKDVTELIQK TPLVYLNNVVDGCVARIAAK LEMMEPCSSVKDRIGYSMI  
TDAEEKGLITPGESVLI EPTSGNTGIGLAFMAAAKGYK LIITMPASMSLERRIILRAFGAELVLTDPAK  
GMKGAVQKAEIILAKTPNSYILQQFENPANPKIHYETTGP E IWRGTGGKVDAFVSGIGTGGTITGAGKF  
LKEQNSDIKLYGVEPVESAVLSGGKPGPHKIQGIGAGFIPGVLDVNLLEDEVVQVSSEEAIETA KLLALK  
EGLLVGISSGAAA AAIAKLAKRPENAGKLI VVVFP SFGER YLSSVLFDSVKREAEENMLKKKHGGQMLDC  
KRCYRTSIAVKLEAMEPCSSVKDRI ALSMIK DVEDKGLIQLGKTVLIEPTSGNSGIELAYIAAVKGYKL  
ILAMPASMSRERRIVLRAFGDELHLLTDPVKG IKG IHEKAEELLEKTPYGYMLKQFANPANPKIHYETTGT  
E IWRGCGGKVDV FVSGVGTGGTVTG VGRFLKEKNPDIKVYGVPEPAESAVLNGGEPGLHKIQGIDPGFIT  
PILDVSILDEVVPI SSEEAIETA KLLALK EGLLVGKPSGVAAAAAIK IAKRPENAGKLI VVVFP SFGER  
YLSTVLFDSIR

# Protein No.: I-129

Protein name and Species:

Proteasome subunit alpha type OS=Glycine max PE=2 SV=1

Accession: [tr|C6TGU2|C6TGU2\\_SOYBN](#)

Unused ProtScore: 13.13

Seq Cov %: 39.2

ITRAQ Changed Ratio:

117: 115=E3TL: D3TL=0.52

116: 114=E5TL: D5TL=0.66

Annotated typical Precursor MS Region:

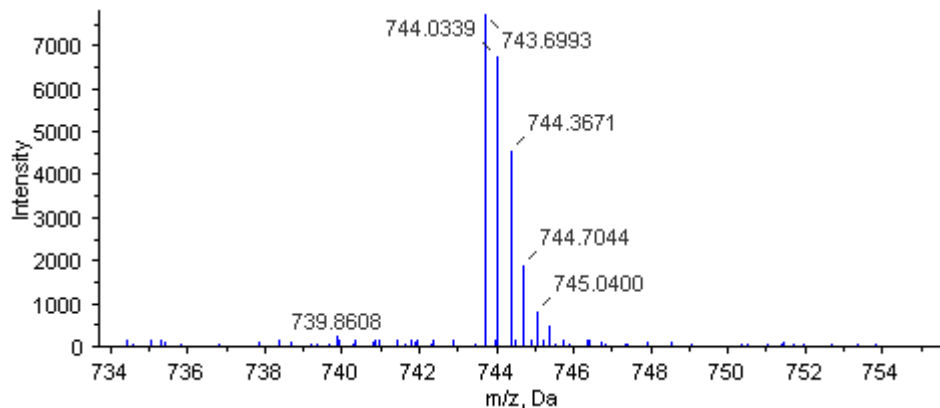

Sequence Coverage and Matched peptides: in different color

MFLTRTEYDRGVNTFSPEGRLFQVEYAIEAIKLGSTAIGLKTKEGVVLAVEKRITSPLLEPSSVEKIME  
IDEHIGCAMSGLIADARTLVEHARVETQNHRRFSYGEPMTVESTTQALCDLALRFEGEGDEESMSRPFQVVS  
LLIAGHDENGPSLYYTDPSGTFWQCNGKAIGSGSEGADSSLQEYQNKDLTLQEAETIALSILKQVMEEK  
VTPNNVDIAKVAPTYHLYTPSEVEAVISRL

# Protein No.: I-131

**Protein name and Species:**

**40S ribosomal protein SA OS=Glycine max PE=2 SV=1**

**Accession: sp|O22518|RSSA\_SOYBN**

**Unused ProtScore: 12.95**

**Seq Cov %: 31.6**

**ITRAQ Changed Ratio:**

**117: 115=E3TL: D3TL=2.47**

**116: 114=E5TL: D5TL=1.62**

**Annotated typical Precursor MS Region:**

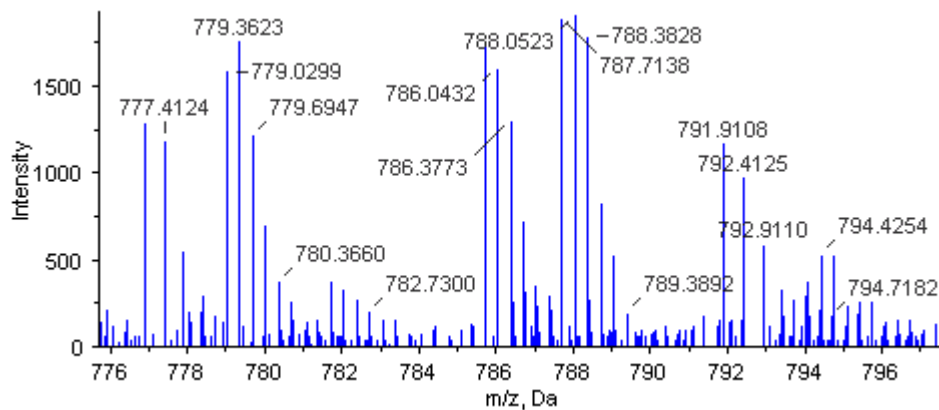

**Sequence Coverage and Matched peptides: in different color**

MATATNAAAAPPRLQSQKEADIQMMLAADVHLGTKNCDFQMERYIFKRRNDGIYIINLGKTWEKQLAA  
RVIVAIENPQDIIVQSARPYGQRAVLKFAQYTGAAHAIAGRHTPGTFTNQLQTSFSEPRLLLLTDPRTDH  
QPIKEAALGNIPTIAFCDDTDSPMRYVDIGIPANNK GKHSIGCLFWLLARMVLQMRGTIRPGLKWDVMVD  
LFFYREPEEAKQQEEEEAPVDYAITDFNAGAIAADGQWPGTIDQSWSDAVPQPIPAVPGVNWGAPAEA  
PAAAGGDWGEAVPPPQIPVPPSGIDTVQPSGWD

## Protein No.: I-132

**Protein name and Species:**

**UDP-D-glucose dehydrogenase OS=Gossypium hirsutum PE=2**

**SV=1**

**Accession: tr|D2D2Z2|D2D2Z2\_GOSHI**

**Unused ProtScore: 12.91**

**Seq Cov %: 19.8**

**ITRAQ Changed Ratio:**

**117: 115=E3TL: D3TL=2.27**

**116: 114=E5TL: D5TL=1.66**

**Annotated typical Precursor MS Region:**

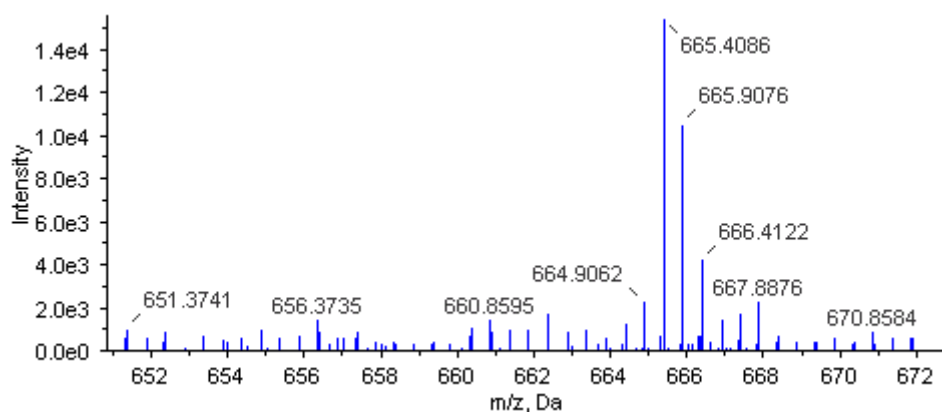

## Sequence Coverage and Matched peptides: in different color

MK**IC**CIGAGYVGGPTMAV**I**ALKCPDIEVAVVDISVPRIAAWNSDQLPIYEPGLDGVVKECRGRNLFFST  
DVEKHVREADIVFVSVNTP**T**TK**TR**GLGAGKAAD**L**TYWESAARM**I**ADV**S**KSDKIVVEKSTVPV**K**TAE**A**IE**K**  
ILTHNSKGIKFQILSNPEFLAEGTAIQDLFNP**DR**V**L**IG**GR**ETPEGNKAVQALKEVYAHWVPEER**IL****TT****N**  
**L**WS**A**EL**S**KL**A**AN**A**FL**A**Q**R****I**SS**V**N**A**M**S**AL**C**EAT**G**AD**V**T**Q**V**S**Y**A**V**G**KDTRIGPKFLNASVGFGGSCFQKDI  
LNLVYICECNGLPEVAEYWKQVI**K****I**ND**Y**Q**K**NR**F**V**N**R**V**SS**M**FN**T**V**S**N**K****I**AIL**G**F**A**F**K**KDTGDTR**E**TP**A**  
**I**D**V**CKGL**L**GDKAR**L**SI**Y**DP**Q**VT**E**D**Q**V**Q**RDL**S**M**N**K**F**D**W**D**H**PL**H**L**Q**P**M**S**P**T**T**V**K**Q**V**S**W**V**W**D**A**Y**E**A**T**K**D**A**H**G  
ICILTEWDEFKKLDFKR**I**Y**D**N**M**Q**K**P**A**F**V**F**D**GRNIVNADELREIGFIVYSIGKPLDPWLKDMPAVA

# Protein No.: I-133

**Protein name and Species:**

**Farnesyl diphosphate synthase OS=Hevea brasiliensis GN=FDP**

**PE=2 SV=1**

**Accession: tr|Q8L7F4|Q8L7F4\_HEVBR**

**Unused ProtScore: 12.91**

**Seq Cov %: 25.4**

**ITRAQ Changed Ratio:**

**117: 115=E3TL: D3TL=0.56**

**116: 114=E5TL: D5TL=0.73**

**Annotated typical Precursor MS Region:**

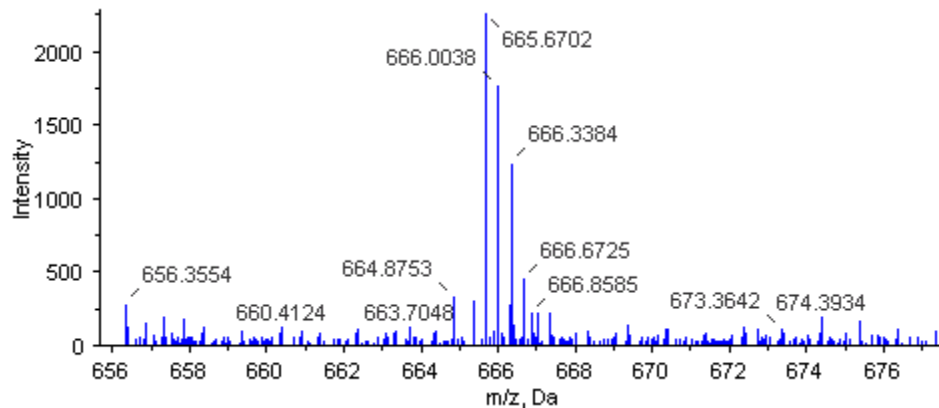

**Sequence Coverage and Matched peptides: in different color**

MADLKSTFLK**VY****SVL****KQ**ELLEDPAFEWTPDSRQWVER**MLDYNVPGG**LN**RGLSVIDSYK**LLKEGQELTE  
EEIFLASALGWCIEWLQAYFLVLDDIMDSSHTRR**GQPCWFR**VPK**VGLIAANDGILLR**NHIPRILKKHFR  
GKAYYVDLLDLFNEVEFQTASGQMIDLITLLEGEKDL**SKY****TLSLHR**RIVQYKTAYYSFYLPVACALLIA  
GENLDNHIVVKDILVQMGIFYFQVQDDYLDCEGDPETIGK**IGTDIEDFK**CSWL**VVKALELCNEEQK****KVLY**  
**EHY****GKADPASVAK**V**KVLYNELK**LQGV**FTEYENESYK**KL**VTSIEAHPSK**PVQAVLKSFLAKIYKRQK

## Protein No.: I-134

Protein name and Species:

Serine/threonine-protein phosphatase OS=Vitis vinifera

GN=VIT\_13s0156g00060 PE=3 SV=1

Accession: tr|F6HPS0|F6HPS0\_VITVI

Unused ProtScore: 12.79

Seq Cov %: 27.6

ITRAQ Changed Ratio:

117: 115=E3TL: D3TL=0.21

116: 114=E5TL: D5TL=0.77

Annotated typical Precursor MS Region:

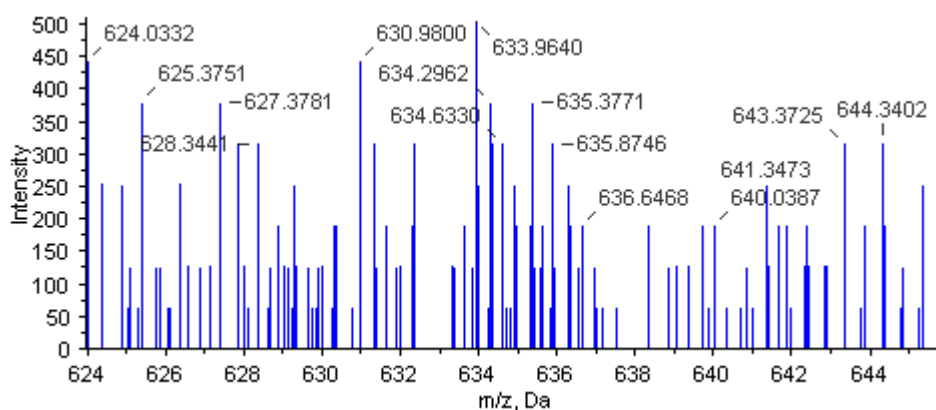

Sequence Coverage and Matched peptides: in different color

MDLISSSDSHGNLDAQISQLMQCKPLSEQEVRTLCEKAKEILMEESNVQPVKSPVTICGDIHGQFHDLAE  
LFRIGGKCPDTNYLFMGDYVDRGYYSVETVTMFVKSNNKQDRVSKSPTKFEYRTMSLACSKIIWLRGLLA  
ELDFSETDPTPLHADNTSANQITTNPVYHERTKHIEVDCHSIRAAFEARLLVALKVRYPQRITILRGNH  
ESRQITQVYGFYDECLRKYGNANVWKIFTDLFDYFPLTALVESEIFCLHGGLSPSIEITLDNIRNFDRVQ  
EVPHEGPMCDLLWSDPDDRCGWGISPRGAGYTFGQDISEQFNHTNNLKLIIARAHQLVMEGFNNGHEQKV  
VTIFSAPNYCYRCGNMASILEVDDCKGHTFIQFEPAPRRGEPDVTRRTPDYFL

# Protein No.: I-135

**Protein name and Species:**

**Calcium-dependent protein kinase, putative OS=Ricinus communis GN=RCOM\_1689450 PE=4 SV=1**

**Accession: tr|B9RCK2|B9RCK2\_RICCO**

**Unused ProtScore: 12.78**

**Seq Cov %: 18.2**

**ITRAQ Changed Ratio:**

**117: 115=E3TL: D3TL=0.63**

**116: 114=E5TL: D5TL=1.20**

**Annotated typical Precursor MS Region:**

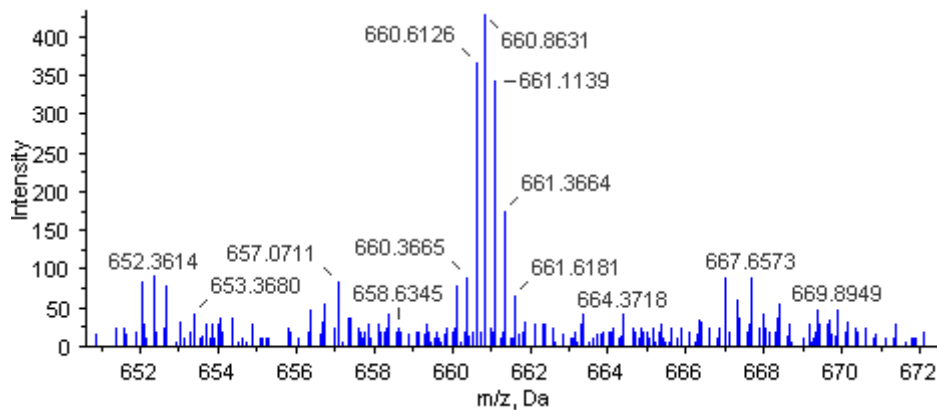

**Sequence Coverage and Matched peptides: in different color**

MGNCSSNLPSTSTFTADRPPPPPPSHGITVHPPTASPPPRPPPPHSLQPTSNNRPSAAPAAVGR**VLGRP**  
**MEDVRSIYAFGRELGRGQFGVTVLVTHK**ETKQQFACKSIAATRKLINR**DDIEDVRR**EVQIMHHLTGHRNI  
VELKGAYEDRHSVNLVMELCAGGELFDR**IIAK**GHYSERAAANLCRQIVTVVHDCHSM**GVIHRDLKPENF**  
**LFLSTDENSPLK**ATDFGLSVFFKPGDTFK**DLVGSAYYVAPEVLR**RNYGPAIDIWSAGVILYILLSGVPP  
FWGETEQAIFDTVLRGHIDFSSDPWP**SISSSAK**DLVKKMLTADAKDR**ISAAEVLNHPWMRVDGDASDKP**  
**LDIAVLTR**MKQFR**AMNK**LKKVALK**VIAENLSEEEIMGLK**EMFK**SMDTDNNGTITYEELK**AGLPKLGTKL  
SESEVKQLMEAADVDGNGTIDYIEFITATMHNRMER**EDHLYKAFEFDKDKSGYITMEELEHALK**EYN  
MGDARTIK**EIIAEVDTDHDGRINYEETFVAMMR**KGNPELVNRRRK



# Protein No.: I-136

## Protein name and Species:

obg-like ATPase 1 [Vitis vinifera] OS=Vitis vinifera

GN=VIT\_10s0003g05020 PE=4 SV=1

Accession: [tr|D7TKK5|D7TKK5\\_VITVI](#)

Unused ProtScore: 12.7

Seq Cov %: 18.5

## ITRAQ Changed Ratio:

117: 115=E3TL: D3TL=0.64

116: 114=E5TL: D5TL=0.79

## Annotated typical Precursor MS Region:

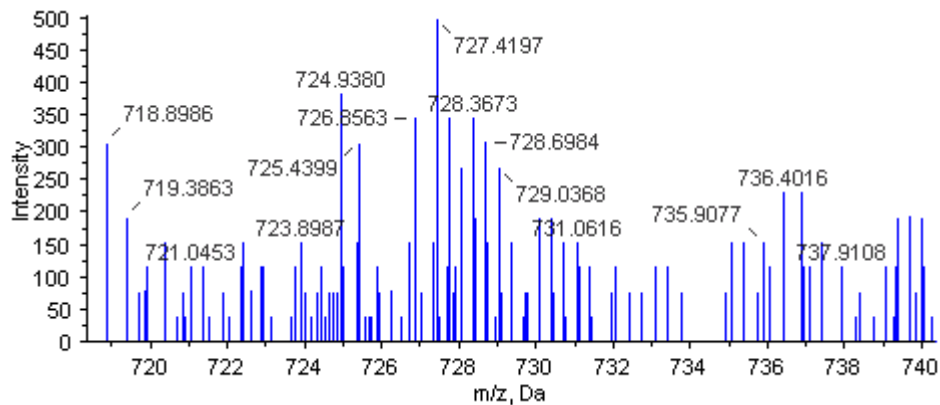

## Sequence Coverage and Matched peptides: in different color

MPPKSSKSK**E**APAER**P**ILGRFSSHLK**I**GIVGLPNVGK**S**TL**F**NT**L**TK**L**AIPAENFPFCTIEPN**E**ARVNIP  
DERFEWLCQLYKPKSEVS**A**FL**E**I**H**DI**A**GLV**R**GAHQ**Q**GLGNSFLSHIR**A**VD**G**IF**H**VL**R**AFED**P**DI**H**VD  
**D**SV**D**P**V**R**D**LE**V**ISEELRLKDIEFIEKRIEDVEKSMKR**S**NDK**Q**LK**I**ELELCLK**V**KA**F**LEDGKD**I**RLGDWK  
AADVEILNTFQLLTAK**P**V**V**Y**L**V**N**M**N**E**K**DYQRKKNKFLPKIHAWVQDHGGETIIPFSCALERNLADMPED  
**E**AAKYCEENKVQ**S**ALPK**I**IK**T**GF**S**AINLIYFFTAGPDEVK**C**WQ**I**RR**Q**TK**A**P**Q**A**A**G**T**I**H**S**D**F**E**R**G**F**I**C**A**E  
**V**M**K**F**D**D**L**KELGSEGA**V**KAAGKYR**Q**E**G**KTYV**V**QDAD**I**I**F**F**K**FNVSGGGKK

# Protein No.: I-138

**Protein name and Species:**

**GTP-binding nuclear protein Ran-3-like [Vitis vinifera]**

**OS=Vitis vinifera GN=VIT\_04s0008g05030 PE=4 SV=1**

**Accession: tr|D7SUQ2|D7SUQ2\_VITVI**

**Unused ProtScore: 12.64**

**Seq Cov %: 19.3**

**ITRAQ Changed Ratio:**

**117: 115=E3TL: D3TL=0.46**

**116: 114=E5TL: D5TL=0.69**

**Annotated typical Precursor MS Region:**

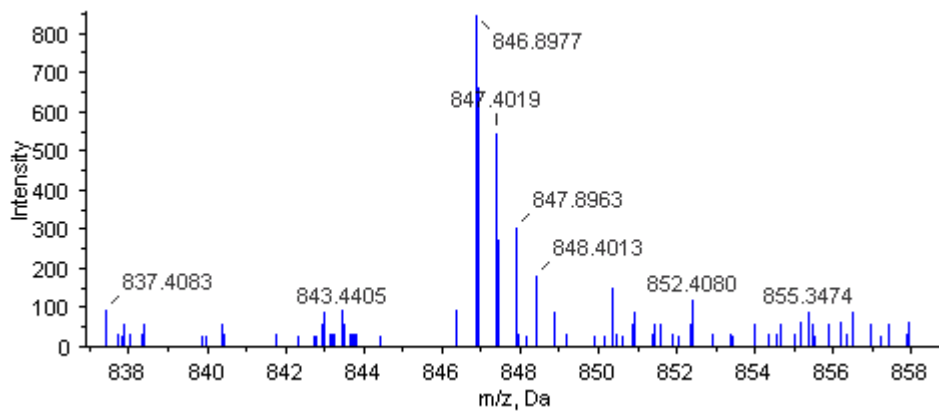

**Sequence Coverage and Matched peptides: in different color**

MPFCYNNNYCYFIKSKKIVITKLFRLDIQRLREIASIKGYNENTRRLLIYIRLKL~~LLLP~~PHSKLKPSFQS  
APWRLPYEKLTLTLQMALPN~~QQTVDYPSFKLVIVGDGGTGK~~TTFVKR~~H~~LTGEFEK~~K~~YEPTIGVEVHPLD  
FFTNCGKIR~~FYCWD~~TAGQEKFGGLRDGYI~~H~~GQCAIIMFDVTARLT~~YK~~NVPTWHRDL~~CR~~VCENIPIVLC  
GNKVDVKNRQVKAK~~QVTFHR~~KK~~NLQYYEISAKSNYNFEKPF~~LYLAR~~K~~LAGDVNLHFV~~ES~~PALAPPEVQI  
DMAAQAHHEAELAAAAAQPLPDDDDDTFE

# Protein No.: I-141

Protein name and Species:

Aspartate aminotransferase OS=Vitis vinifera

GN=VIT\_04s0008g03770 PE=3 SV=1

Accession: tr|D7SUD7|D7SUD7\_VITVI

Unused ProtScore: 12.36

Seq Cov %: 27

ITRAQ Changed Ratio:

117: 115=E3TL: D3TL=0.55

116: 114=E5TL: D5TL=0.47

Annotated typical Precursor MS Region:

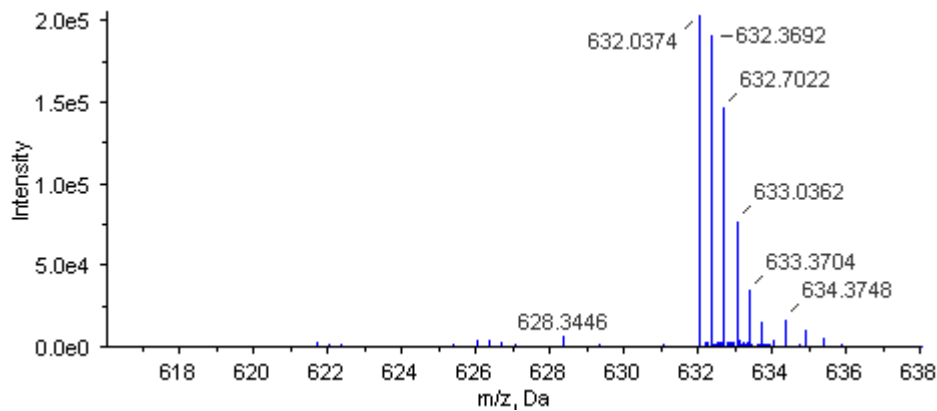

Sequence Coverage and Matched peptides: in different color

MDPNHTISASATSGSDFGGSVFDHVVQ**APEDPILGVTVA**YNKDPSPVK**LNLGVGAYRTEEGKPLV**LN**VV**  
RRAEQLLVNDRSRVK**EYLP**IVGLAEFNKLSAKLMFGADSPA**IQVKRV**TT**VQCLSGTGS**LRVGA**EFLARH**  
HHQRTIYIPQPTWGNHGKIFTLAGLSVKTYRYY**DPATR**GLNFQGLLEDLSLAPSGA**IVLLHACA**HNPTG  
VDPTLQQWEQIRQLIRLK**GLLPFFDSAYQGFASGSLDADAQSVR**MFVADGG**ECLAAQSYAKNMGLYGER**  
**VGALSIVCKTADV**ASRVESQVKLVIRPMFSNPPIHGASIV**AIILK**NRDMYNEWTVELKAMADRIISMRQ  
QLFDALRARGTPGDWNHILKQIGMFTFTGLNTAQVAFMTKEYHVYMTSDGR**ISMAGLSSKTVPHLADAI**  
**HAAVTRAI**

# Protein No.: I-145

**Protein name and Species:**

**Citrate-binding protein OS=Hevea brasiliensis GN=CBP PE=1**

**SV=1**

**Accession: sp|Q39962|CBPR\_HEVBR**

**Unused ProtScore: 12.21**

**Seq Cov %:34.9**

**ITRAQ Changed Ratio:**

**117: 115=E3TL: D3TL=0.29**

**116: 114=E5TL: D5TL=0.38**

**Annotated typical Precursor MS Region:**

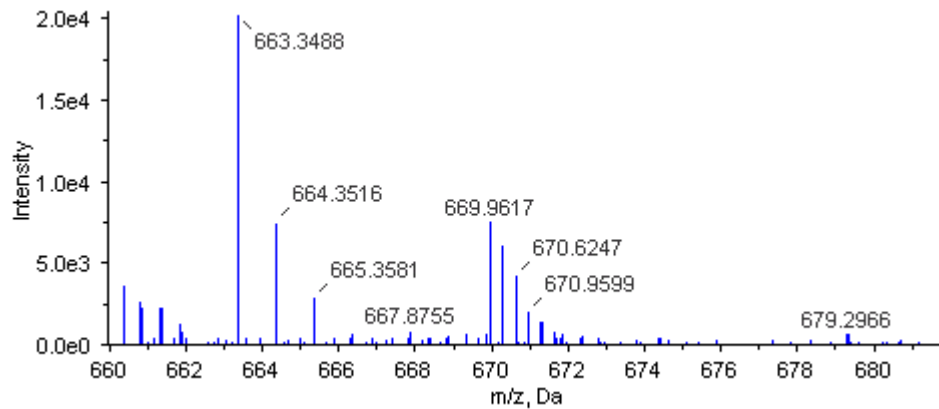

**Sequence Coverage and Matched peptides: in different color**

MKMKRSPYCFCCSFALLLLVLSFLKDRHFCSA**DPTDGFTEVPLTEDNFVIQKPYDK**PLNDRYSYKNGIRR  
**LWVYENDKPFKVGSPTRPR**TEIRIKGHDYSSGVWQFEGQVHVPEGTSGVTVM**QVFGAVNKATALQLRVY**  
**NGDLK**SYK**SNSVATDIYNK**WLR**VNVVHK**VGK**GEITVFINGQQKLVVND**DGPAEHYFKCGVYAAPDGSSN  
**YMESR**WKNIKLYKSDNKLEGCNNNHGTWLVQ

## Protein No.: I-148

**Protein name and Species:**

**Acetyl-CoA C-acetyltransferase OS=Hevea brasiliensis**

**GN=HbAACT PE=2 SV=1**

**Accession: [tr|A9ZMZ5|A9ZMZ5\\_HEVBR](#)**

**Unused ProtScore: 12**

**Seq Cov %: 61.8**

**ITRAQ Changed Ratio:**

**117: 115=E3TL: D3TL=0.55**

**116: 114=E5TL: D5TL=0.66**

**Annotated typical Precursor MS Region:**

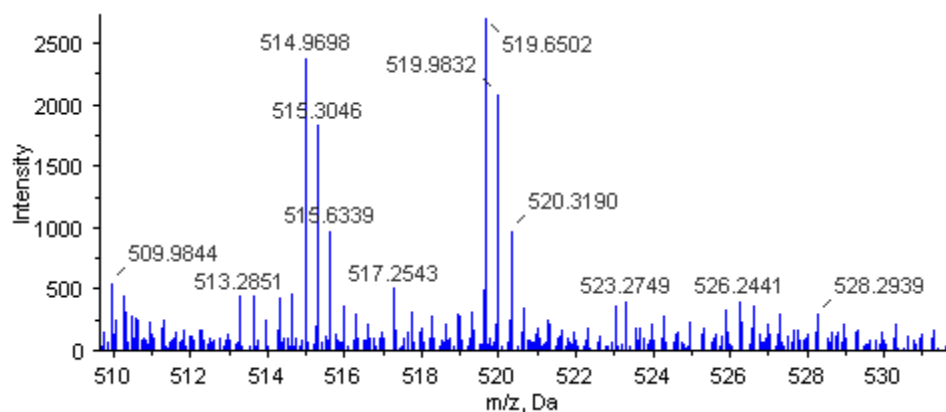

## Sequence Coverage and Matched peptides: in different color

MAPAAATAVAAEIKPRDVCIVGVAR**TPMGGFLGSLCTL**SATK**L**GSIAIEAALKRANVDPSLVQEVFFGN  
VLSANLGQAPARQAALGAGIPNSVVCTTVNKVCASGMKATMLAAQSIQLGINDVVAGGMESMSNAPKY  
**LAEAR**KGSRLGHDSLVDGMLKDGLWDVYNDVGM**G**SCAEICADNHSITREDQDKFAIHSFERGIAAQESG  
AFAWEIVPVEVSGGRGKPSTIVDKDEGLGK**FDPVKLRKLRPSFK**ENGGTVTAGNASSISDGAAAVILVS  
GETALKLGLQVIAK**I**GGYADAAQ**AP**EL**FTT**SPAL**AIPK**TIANGGLDASQVDYYEINEAFVVALANQ**L**  
**LGLNPEKINVHGGAVSLGHPLGCSGARILVTL**LGVL**R**QKNGKYGVGGVCNNGGGGASALVVELL

# Protein No.: I-150

**Protein name and Species:**

**Pyridoxal biosynthesis protein PDX1 OS=Hevea brasiliensis**

**GN=PDX1 PE=2 SV=1**

**Accession: sp|Q39963|PDX1\_HEVBR**

**Unused ProtScore: 11.87**

**Seq Cov %: 29.8**

**ITRAQ Changed Ratio:**

**117: 115=E3TL: D3TL=2.40**

**116: 114=E5TL: D5TL=1.42**

**Annotated typical Precursor MS Region:**

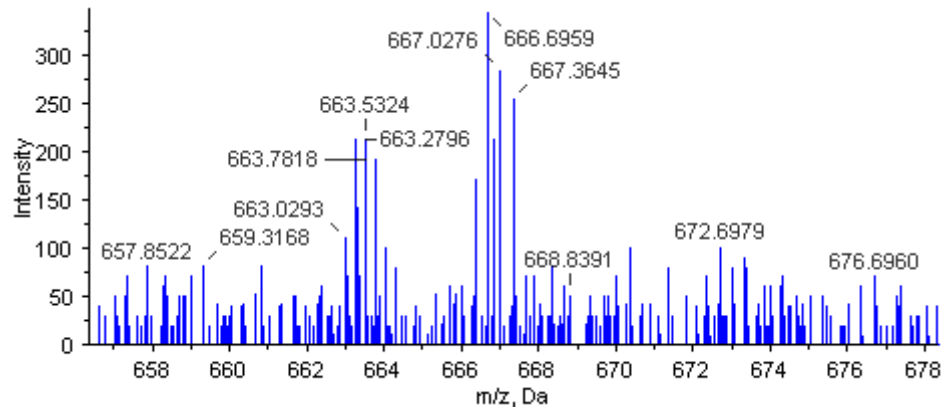

**Sequence Coverage and Matched peptides: in different color**

MAGTGVVAVYGN**GAITETK**KSPFSVKVGLAQMLRGGVIMDVVNPEQARIAEEAGACAV**MALER**VPADIR  
AQGGVARM**SDPQLIK**EIKQSV**TIPVMAK**ARIGHFVEAQILEAIGIDYVDESEVLT**PADEENHINKHNFR**  
IPFVCGCRNLGEALRRIREGAAMIR**TKGEAGTGNVIEAVR**HVR**SVMGDIRLLRNMDDEVF**TF**AKKIAA**  
PYDL**VMQTK**QLGRLPVVQFAAGGVATPADAALMMQLGCDGVFVGS**GVFKSGDPARRARAIVQAV**THYSD  
PDMLAEVSCGLGEAMVGINLN**DKKVERFANRSE**

# Protein No.: I-151

**Protein name and Species:**

**NAD dependent epimerase/dehydratase, putative OS=Ricinus communis GN=RCOM\_1683000 PE=4 SV=1**

**Accession: tr|B9RC03|B9RC03\_RICCO**

**Unused ProtScore: 11.81**

**Seq Cov %: 27.5**

**ITRAQ Changed Ratio:**

**117: 115=E3TL: D3TL=1.75**

**116: 114=E5TL: D5TL=1.51**

**Annotated typical Precursor MS Region:**

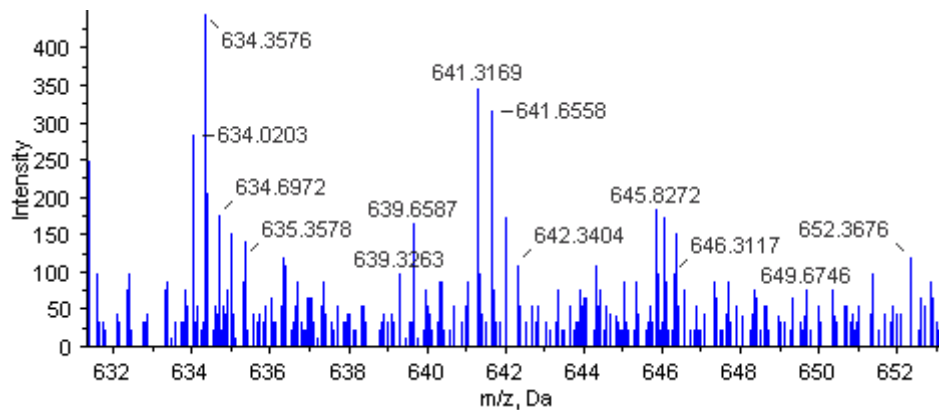

**Sequence Coverage and Matched peptides: in different color**

MGFQSN GATDNKKPYKFLIYGR**TGWIGLLGKLCESQ**GIDYTYGN**GR**LENRVSL**ENDIASINPTHVFNA**  
**AGVTGR**PNVDWCESHKVETIR**TNVAGTLTLADVCR**EKGLVVLIN**YATGCIFEYDDKHPLGSGIGFK**EEDT  
**PNFIGSFYSKTKAMVEELLK**NYENVCTLRVRMP**ISSDLANPRNFITK**ITRYEKVVDIPNSMTILDELLP  
ISIEMAKRNLTGIWNFTNPGVVSHNEILEMYR**DYVDPNF**TWKNFT**LEEQAKVIVAPRSNNELDATKLSK**  
**EFPEMLPIK**ESLIKYVFKPNQKTAAA



# Protein No.: I-152

**Protein name and Species:**

**Calmodulin OS=Clematoclethra scandens subsp. tomentella**

**GN=CaM PE=4 SV=1**

**Accession: tr|B1NDK1|B1NDK1\_9ERIC**

**Unused ProtScore: 11.77**

**Seq Cov %: 50**

**ITRAQ Changed Ratio:**

**117: 115=E3TL: D3TL=0.61**

**116: 114=E5TL: D5TL=0.63**

**Annotated typical Precursor MS Region:**

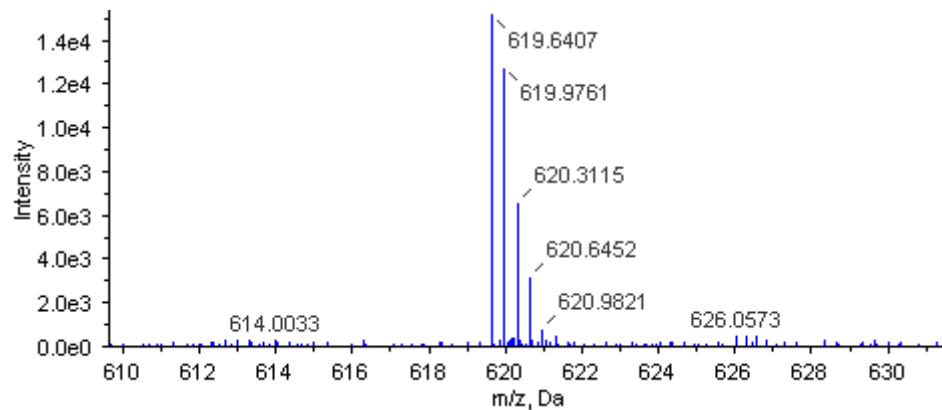

**Sequence Coverage and Matched peptides: in different color**

MADPLTDDQISEFK**EAFSLFDKDGDCITTK**ELGTVMRSLGQNPTEAELQDMINEVDADGNGTIDFPEF  
LNLMARK**MKD**TD**SEELKEAFRVFDK**DQNGFISAAELRHVMANL**GEK**LTDEFVDEMIREADV**DGDGQIN**  
**YEEFVK**VMMA

# Protein No.: I-160

**Protein name and Species:**

**26S proteasome non-atpase regulatory subunit, putative**

**OS=Ricinus communis GN=RCOM\_1507340 PE=4 SV=1**

**Accession: tr|B9RAM4|B9RAM4\_RICCO**

**Unused ProtScore: 11.38**

**Seq Cov %: 20.7**

**ITRAQ Changed Ratio:**

**117: 115=E3TL: D3TL=0.44**

**116: 114=E5TL: D5TL=0.62**

**Annotated typical Precursor MS Region:**

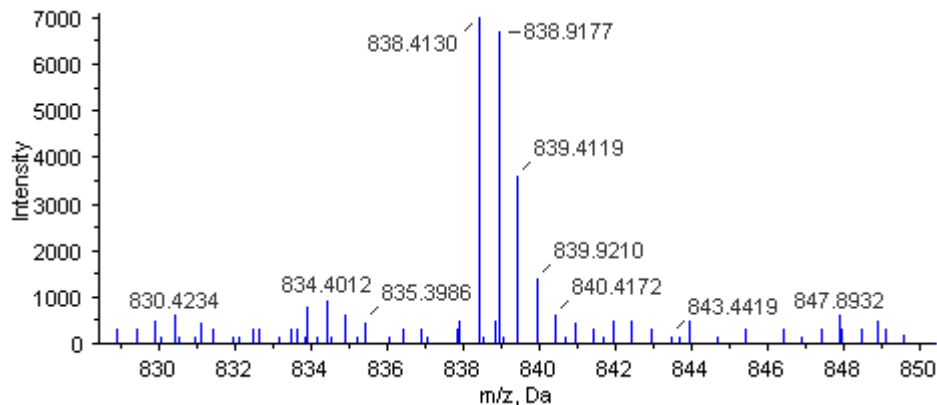

**Sequence Coverage and Matched peptides: in different color**

MEGQEGTQQPHLILAHKR**FLLTHPDVQDIEK**VRLKKEEVFAAVKSDDMAPLYETLITEGLLEKQSIIDL  
MRAKNEDELKKIDEK**IADAEENLGESEVR**EAHLAK**SLFYIR**IGDKEK**ALEQLK**VTESKTVAVGQKMDLV  
FYTLQLGFFYMDFDLISKSIDKAK**NLFEEGGDWER**KNRLK**VYEGLYCMSTR**NFTKAATLFLDISISTFTT  
YELFPYDTFIFYTVLTSIITLDRVSLKQK**VVDAPAILTVIGK**IPYLSEFLNSLYFCQYKSFSAFAGIA  
EQIKLDRYLHHPHFRYYMREVR**TVVYSQFLESYK****SVTIEAMAK**AFGVTVEFIDLELSRFIAAGKLHCKID  
KVAGVLETNRPDAKNALYQATIKQGD**FLNRIQKLSRVIDL**

## Protein No.: I-161

Protein name and Species:

Abscisic acid stress ripening-related protein 1 OS=Hevea  
brasiliensis GN=ASRLP1 PE=4 SV=1

Accession: [tr|Q6XNP8|Q6XNP8\\_HEVBR](#)

Unused ProtScore: 11.37

Seq Cov %: 21.3

ITRAQ Changed Ratio:

117: 115=E3TL: D3TL=0.31

116: 114=E5TL: D5TL=0.42

Annotated typical Precursor MS Region:

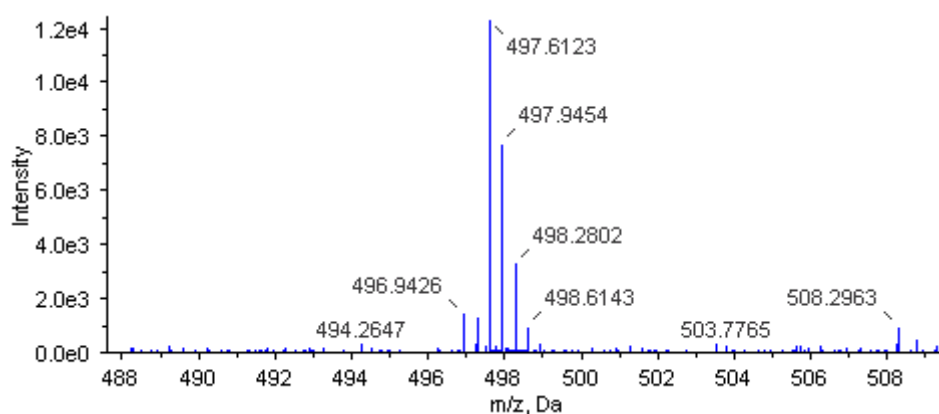

Sequence Coverage and Matched peptides: in different color

MAEEKHHHLFHHHK**KEGQEA**VDCR**K**EEKHHK**HLCQLGKLG**AAAAAGTYAL**HEK**HAAKKDPEHAHGHI**KEE**  
VAAAAAIGAGGFAPFHEHHEK**K**EA**KKNEEGHGK**KHHHPF

# Protein No.: I-167

**Protein name and Species:**

**Myo-inositol-1-phosphate synthase OS=Ricinus communis**

**GN=MIPS PE=2 SV=1**

**Accession: tr|C7B9C0|C7B9C0\_RICCO**

**Unused ProtScore: 11.12**

**Seq Cov %: 18**

**ITRAQ Changed Ratio:**

**117: 115=E3TL: D3TL=10.47**

**116: 114=E5TL: D5TL=2.51**

**Annotated typical Precursor MS Region:**

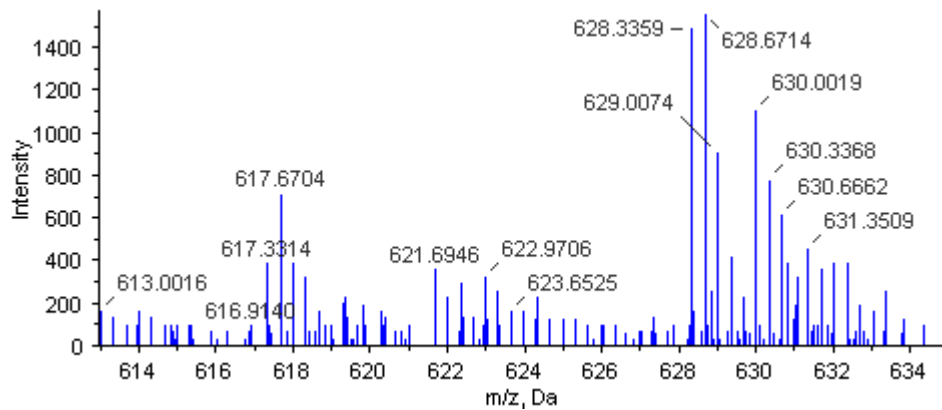

**Sequence Coverage and Matched peptides: in different color**

MFIEK**FQVESPNVKY**SEDEIH**SVYNYETTEL**VHENRNGTYQW**IVKP**KTVQYEFKTDVHVPKLGVMVLVGV  
GGNNGSTLTGGVIANREGISWATKDK**VQQANYFGSLTQASSIRVGSFN**GEEIYAPFKSLLPMVNPDDIV  
FGGWDISDMNLADAM**ARAK**VLDIDLQKQLRPYMESMVPLPGIYDPDFIAANQGSRANNVIKGTKKEQME  
QIVKDIREFKEKTKVDK**VVVLWTANTER**YSNVVVLNNDTMSLLASLERNEAEISPSTLYALACIFENV  
PFINGSPQNTFVPGVIDLAIKG**NSLIGDDFK**SGQTKMKSVLVDFLVGAGIKPTSIVSYNHLGNNDGMN  
LSAPQTFRSKEISKSNVDDMVSSNGILYEPGEHPDHVVVIK**YVPYVGDSKRAMDEYTSEIFMGK**STI  
VLHNTCEDSLLAAPIIIDLVLLAELSTRIQLKAEGEGKFHSHFPVATILSYLTK**APLVPPGTPV**NALS  
**KQRAMLENILRACVGLAPENNMILEYK**

# Protein No.: I-168

**Protein name and Species:**

**Catalytic, putative OS=Ricinus communis GN=RCOM\_0291690**

**PE=4 SV=1**

**Accession: tr|B9SZU0|B9SZU0\_RICCO**

**Unused ProtScore: 10.98**

**Seq Cov %: 22.2**

**ITRAQ Changed Ratio:**

**117: 115=E3TL: D3TL= 0.45**

**116: 114=E5TL: D5TL= 0.64**

**Annotated typical Precursor MS Region:**

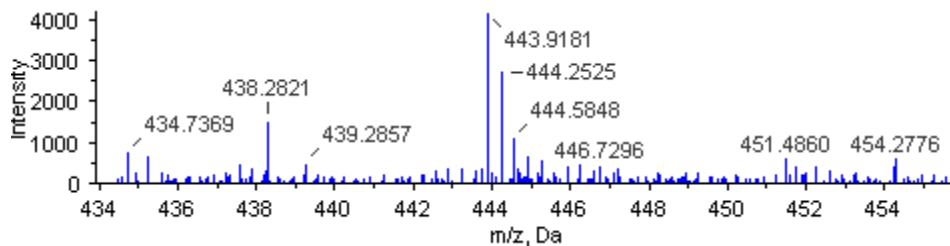

**Sequence Coverage and Matched peptides: in different color**

MVPITVLLSSFLLLFTVSHGFAPPRSFLQSLSGSNNTYLTTKELWFNQILDHYSPTYDHRRFQQRYEYLD  
YFRAPGGPIFLKICGESSCNGIANDYISVLAKKFGAAVVSLEHRYYGKSTPFKSSETKNLRYLSSKQAL  
FDLAVFRQHYQEALNLKLNRTNVENPWIVFGISYSGALSAWYRLKFPHLTCGSVASSAVVLAVYNFTEF  
DQQIGESAGAECKAALQETTQLVDERLASNRKAVKTLFNAAELEIDGDFLYFLADA AVIAFQYGNPDKL  
CSPLVEAKKAGEDLVEAYAKYVKEYYVGSFGVSVETYNQKHLKDTAINENSSDRLWWFQVCTEVAYFQV  
APSND SIRSSKVNTRYHLLDLCKNVFGEGIYPEVDTTNIYYGGTKIAGSKIVFTNGSQDPWRHASKQISS  
PDTPSYIITCHNCGHGTDMRGCPQSPLSLEGNAQNCSSPDAVQKVRQQVIEHIDLWLSECEASGRSYI

## Protein No.: I-169

**Protein name and Species:**

**Proliferation-associated 2g4, putative OS=Ricinus communis**

**GN=RCOM\_0489730 PE=4 SV=1**

**Accession: tr|B9SWY5|B9SWY5\_RICCO**

**Unused ProtScore: 10.97**

**Seq Cov %: 15.2**

**ITRAQ Changed Ratio:**

**117: 115=E3TL: D3TL= 1.53**

**116: 114=E5TL: D5TL= 1.66**

**Annotated typical Precursor MS Region:**

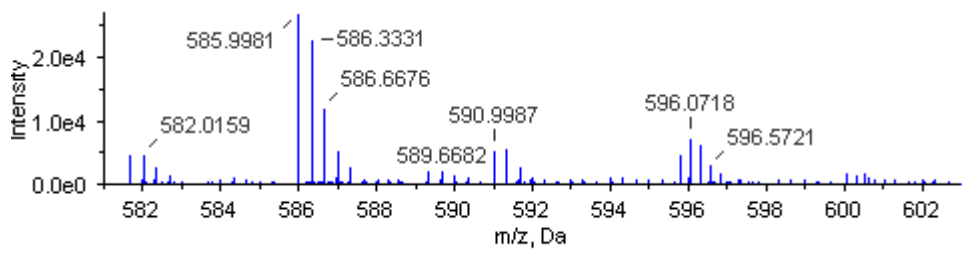

## Sequence Coverage and Matched peptides: in different color

MSDDEREK **ELDLTSPEVVTK**YK **SAAEIVNK**ALQLVISECKPKAK **IVDLCEK**GD AFIRE **Q TGNMYK**NVK  
KKIERGVAFPTCVSVNNTVCHCSPLASDETLLEEGDVVKIDMGCHIDGFIAVVGHTHVLQAGPVTGR **AA**  
**DVIAAANTAAEVALR**LVRPGKKNKDV **TEAIQK****VAAAYDCK****IVEGVL****SHQLKQFVIDGNK**VILSVSNPET  
RVDDAEFEENEVY AIDIVTTTGGEGPKLLDEKHTT IYKRAVDKNYHLKMKASR **FIFSEISQK**FPIMPFT  
ARALEEKRARLGLVECVNHDL LQPYPVLHEKPGDIVAHIK **FTVLLMPNGSDR**ITSHSLQELQPTKTIDD  
PEIKAWLALGKTKKKKGGGKKKKKAKKGDKAEESTEAEPM DATNGAETQE

# Protein No.: I-170

## Protein name and Species:

Aspartic proteinase, putative OS=Ricinus communis  
GN=RCOM\_1303660 PE=3 SV=1

Accession: [tr|B9SVA7|B9SVA7\\_RICCO](#)

Unused ProtScore: 10.95

Seq Cov %: 26.1

## ITRAQ Changed Ratio:

117: 115=E3TL: D3TL= 0.30

116: 114=E5TL: D5TL= 0.52

## Annotated typical Precursor MS Region:

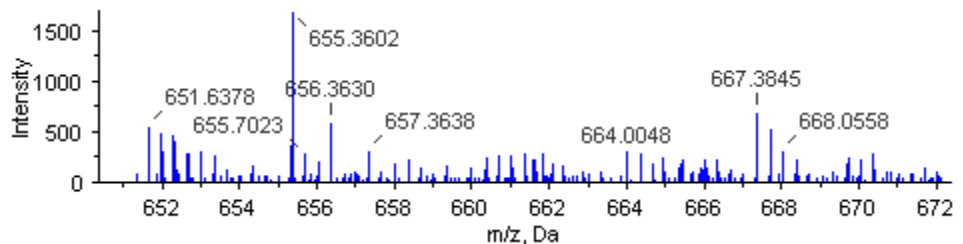

## Sequence Coverage and Matched peptides: in different color

MGTIFKPALFFCLILLPLVCATASSNDGLVRI**IGLK**KRKFQNNRVAAQFESKEGEAFRASIKKYHIRG  
NLGDA**AEDIDIVSLKNYMDAQYFGEIGIGTPPQK**FTVIFDTGSSNLWVPSSK**CYFSVACYFHSK**YKSGQS  
**STYK**KNGKSADIHYGTAISGFFSQDNVKGELVIK**NQEFIEATREPSITFLVAK**FDGILGLGFQEISV  
**GNAV**PVWYNMVNQGLV**KEPVFSFWFN**NADEDEGG**EIFVGGMDPNHYKGEHTYVPVTQK**GYWQFDMGDV  
**LIDGK**TTGICSSGCAAIADSGTSLLAGP**TTIITEVNHAI**GATGVVS**QECKAVVAQYGETTIAMLLAK**DQ  
PQKICSQIGLCTFDGSRGVSMGIESV**VNEKIQE**VAGGLHDAMCSTCEMAV**VWMQNQLKQNTQEHILNY**  
**VNELCER**LPSMGESAVDCGSLSTMPNVSFTIGGR**VFDLAPEQYVLK**VGDG**EAAQCISGFTALDVPPPR**  
GPLWILGDVFMGP**FHTVFDYGNK**RVGF**AEVA**



# Protein No.: I-175

**Protein name and Species:**

**Phosphoglyceride transfer family protein OS=Hevea brasiliensis**

**PE=2 SV=1**

**Accession: tr|Q6J6I5|Q6J6I5\_HEVBR**

**Unused ProtScore: 10.83**

**Seq Cov %: 33.5**

**ITRAQ Changed Ratio:**

**117: 115=E3TL: D3TL= 0.08**

**116: 114=E5TL: D5TL= 0.59**

**Annotated typical Precursor MS Region:**

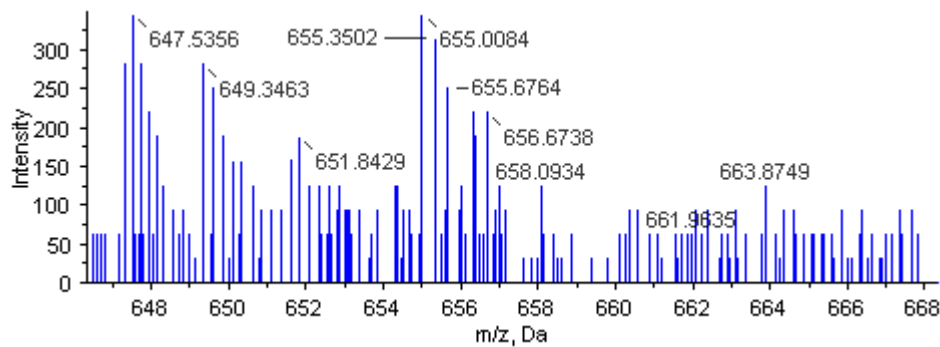

**Sequence Coverage and Matched peptides: in different color**

MLT**GT**LKWRATYKPEEIRWHEISHEVEKGVFRANFHDYGR**TVLIMRPEMQNTTSAVDNIR**HLAYVIE  
NSILNLAEGQEQMSWLIDFTGLSLSNSM**SIGTGV**DI**IKILQNHYPERLAVAFVYNPPRIF**EAFWKAVKC  
VLNSKTSEKVK**FVYPNNK**ESEEVMR**HFFDVDNLPGEFGGK**ATMK**YDHEEFSRLMAQDDVK**TAKYWGFD  
KPTHIANAQLRPPQLAPEPTPFAPPAS

## Protein No.: I-181

**Protein name and Species:**

**Polyadenylate-binding protein, putative OS=Ricinus communis**

**GN=RCOM\_0812530 PE=4 SV=1**

**Accession: tr|B9RYE9|B9RYE9\_RICCO**

**Unused ProtScore: 10.63**

**Seq Cov %: 15.2**

**ITRAQ Changed Ratio:**

**117: 115=E3TL: D3TL= 1.75**

**116: 114=E5TL: D5TL= 1.24**

**Annotated typical Precursor MS Region:**

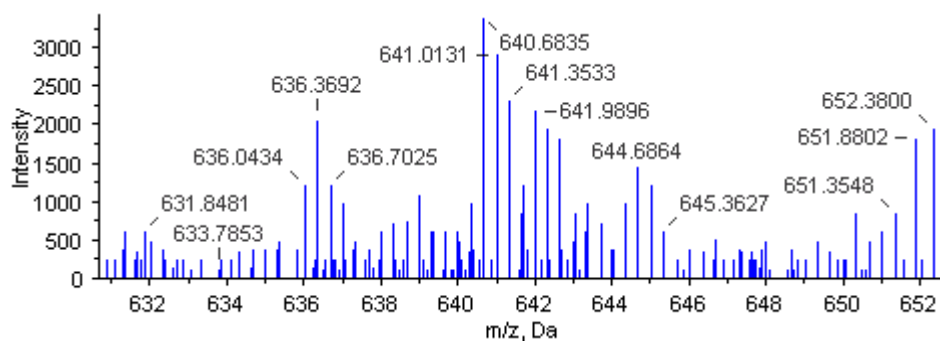

## Sequence Coverage and Matched peptides: in different color

MAQVQVPVQGQNVNNGGANAPYVTTSLYVGDLEANVTDSHLYDLFNQVGQVVSVRVCRDLTTRR**SLGYGY**  
**VNYSSPQDAARALDMLNFTPLNGSPIR**IMYSHRDPSVRK**SGSGNIFIK**NLDKGIDHKALHDTFSAFGNI  
LSCK**VATDSSGQSK**GYGFVQFDNEESAQKAIEK**LNGMLLNDKQVYVGPFLR**KQERESAIKTR**FNNVYV**  
**KNLSETTTEEDLKKAFGEYGTITSAVVMRDGDGKTKCF****GFVNF**ENADDAAT**AVEALNGK**KFDDKEWFG  
KAQKKNERENELKVR**FEQSMKEAADKFQGANLYIK****NLDDSIGDDR****LKQLFSPFGTITSCK**VMRDPNGIS  
RSGSFVAFSTPE**EASKALMEMNGK****MVVS****KPLYVALAQR**KEDRRARLQAQFSQIRPVAMAPSVAPRMPMY  
PPGGPGLGQQIFYGQAPPAILPPQPGFGYQQQLVPGMRPGGAPMPNFFVPMVQQGQQGQRPGGRRAGAA  
QQSQQPVPLMQQMVPRGRVYRYPGRGIPDVPMTGVAGGMLSVPYDMSGMPMRDAALSQPIPIGALAS  
ALANASPEQQR**TMLGENLYPLVEQLEPDAAAK**VTGMLLEMDQTEVLHLLLESPEALKAK**VAEAMEVLR**SV  
QQQQAGGAADQLASLSLNDNLVS

# Protein No.: I-186

**Protein name and Species:**

**Proteasome subunit beta type OS=Ricinus communis**  
**GN=RCOM\_0205360 PE=3 SV=1**

**Accession: tr|B9SPS6|B9SPS6\_RICCO**

**Unused ProtScore: 10.47**

**Seq Cov %: 29**

**ITRAQ Changed Ratio:**

**117: 115=E3TL: D3TL= 1.60**

**116: 114=E5TL: D5TL= 1.41**

**Annotated typical Precursor MS Region:**

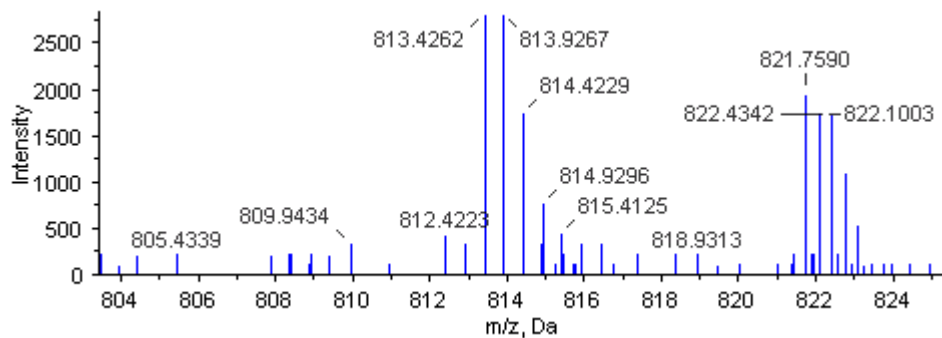

**Sequence Coverage and Matched peptides: in different color**

MDLKAPHSMG**TTIIGVTYNGGVVLGADSR**STGMYVANR**ASDKITQLTDNVYVCRSGSAADSQIVSDYV**  
**RYFLHQHTIQLGQPATVKVAANLVRLISYNNKNMLETGLIVGGWDK**YDGGKIYGIPLGGTIIIEQPFAIG  
GSGSSYLYGFFDQAWKEG**MTKDEAEQLVVKAVSLAMAR**DGASGGVVR**TVIINSEGVTR**NFYPGDSLPLW  
HEELEPQNSLLDILNASSPEPMNI

## Protein No.: I-187

**Protein name and Species:**

ras-related protein RABC1 isoform 1 OS=Populus trichocarpa

GN=POPTRDRAFT\_798654 PE=3 SV=1

**Accession:** tr|B9GTP5|B9GTP5\_POPTR

**Unused ProtScore:** 10.45

**Seq Cov %:** 42.2

**ITRAQ Changed Ratio:**

**117: 115=E3TL: D3TL= 0.52**

**116: 114=E5TL: D5TL= 0.70**

**Annotated typical Precursor MS Region:**

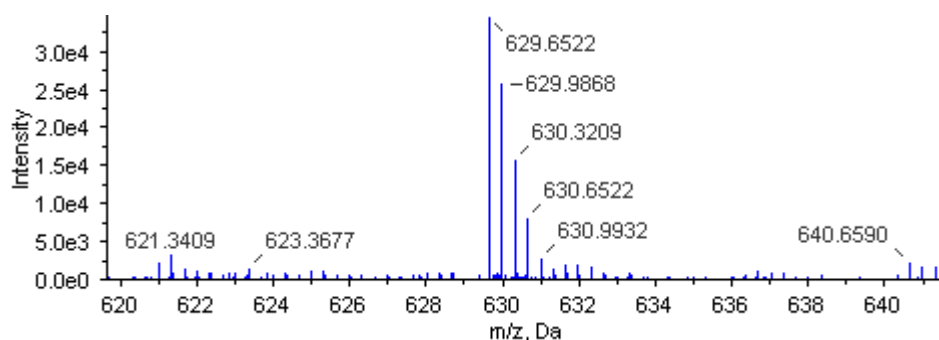

**Sequence Coverage and Matched peptides:** in different color

MEVPSTSQQEFE**YLFK**LLLLIGDSGVGK**STLLLSFTSK**NFEDLSPTIGVDFKVKHV**TIGGK**KLKLAIWDT  
AGQERFR**TLTSSYYRGAQGI**IMVYDVTRRETFTNLSEIWAK**EIDLYSTNQDCIK**MLVGNKVDKESERVV  
TKK**EGIDFAREYGC**LFLECSAKTRVNVEQCFEELVLKILETP**SLLAEGSSGVKK**NVFKQKPPEDVTSS  
CCSW

## Protein No.: I-188

**Protein name and Species:**

**ATP synthase subunit beta, mitochondrial OS=Hevea  
brasiliensis GN=ATPB PE=2 SV=1**

**Accession: [sp|P29685|ATPBM\\_HEVBR](#)**

**Unused ProtScore: 10.41**

**Seq Cov %: 17.3**

**ITRAQ Changed Ratio:**

**117: 115=E3TL: D3TL=7.52**

**116: 114=E5TL: D5TL=1.63**

**Annotated typical Precursor MS Region:**

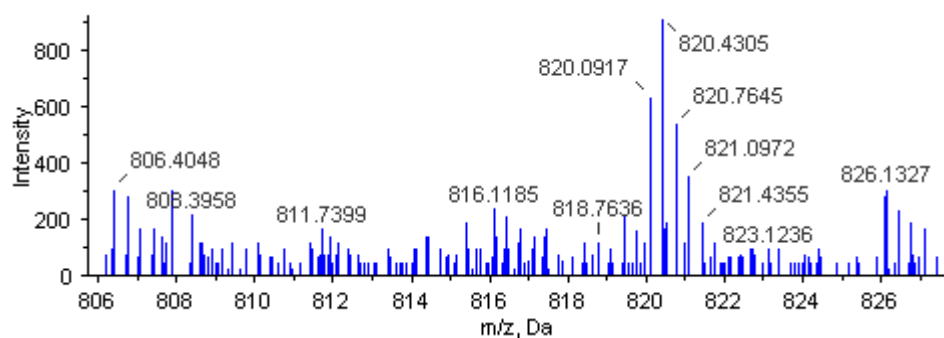

## Sequence Coverage and Matched peptides: in different color

MASRRLLSLLLRSSRRSVSKSPI SNINPKLSSSSPSSKSRASPYGYLLTRAAEYATSAAAAAPPQPPP  
AKPEGGKGGGK**ITDEFTGK**GAIGQVCQVIGAVVDVRFDEGLPPIILTSLEVLDHSIRLVLEVAQHMGEGM  
VRTIAMDGTEGLVRGQR**VLNTGSPITVPVGR**ANPWTYHEVIGEPIDERGDIKTSHFLPIHR**EAPAFVDQ**  
**ATEQQILVTGIKVVDLLAPYQR**GGKI**GLFGGAGVGK**TVLIMELINNVAKAHGGFSVFAGVGER**TREGND**  
**LYREMIESGVIK**LGDQKQADSKCALVYGQMN**EPPGARARVGLTGLTVAEHFR**DAEGQDVLLFIDNIFR**FT**  
**QANSEVSALLGRIPSAVGYQPTLATDLGGLQER****ITTTK**KGSITSVQAIYVPADDLTDPA PATTFAHLDA  
TTVLSR**QISELGIYPAVDPLDSTSR**MLSPH**ILGEEHYNTAR**GVQKVLQNYKNLQDIIAILGMDELEDD  
K**LTVARARKI**QRFLSQPFHVAEVFTGAPGKYVELK**ESITSFQGVLDGK**YDDLPEQSFYMGVGGIDEVIAK  
ADKIAKESAS

## Protein No.: I-191

**Protein name and Species:**

**Acid phosphatase, putative OS=Ricinus communis**

**GN=RCOM\_0854040 PE=4 SV=1**

**Accession: tr|B9RUL1|B9RUL1\_RICCO**

**Unused ProtScore: 10.38**

**Seq Cov %: 7**

**ITRAQ Changed Ratio:**

**117: 115=E3TL: D3TL=0.58**

**116: 114=E5TL: D5TL=0.60**

**Annotated typical Precursor MS Region:**

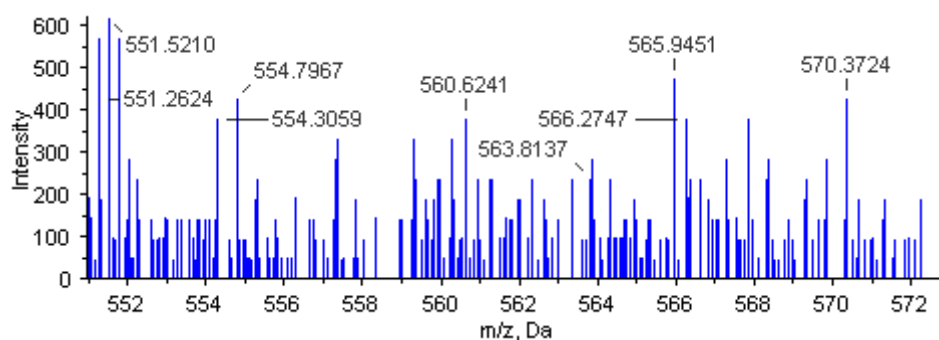



## Sequence Coverage and Matched peptides: in different color

MEEEGGEMEKKIKIGVCMEEKKVL SAPMGQIMDRLQAFGEFEI IHFGDKVIAEDPIESWPICDCLIAFY  
SSGYPLEK**AEAYAALR**KPFLVNELEPQHLLHDRRKVYQRLEMY**GIPVPR**YALVNREFPYQELDYFSEEE  
DFVEVHG NRFWKPFVEKPIDGDNH SIMIYYPSSAGGGMKELFRKVG NRSSEFHPEVRRVRREGSYIYEE  
FMPTGGTDVK**VYTVGPEYAHAEAR**KSPVVDGVVMRNPDGKEVRYPVLLTPNEKQ MAREVCI AFRQAVCG  
FDLLRCEGRSYVCDVNGWSFVKNSYKYYDDAACVLRKMFLDAKAPHLSS TIPP TLPWKINEPVQPSEGL  
TRQSGIIGTFGQSEELRCVITVMRHGDRTPKQVKLKVTEEK**LLNLMLK**YNGGRPRSETK**SAIQLQ**  
**DLLDATRILVPR**IRPGR**ESDSEAEDIEHAEK**LRQVK**AVLEEGGHFSGIYR**KVQLKPLKWVKIPKSTGEA  
EEERPVEAL**LMVLKYGGVLT**HAGRK**QAEELGR**YFRNNMYPGEGTGLLRHLHSTYR HDLKIYSSDEGRVQMS  
A**AAFAK**GLLDLEGQLTPILVSLVSKDSSMLDGLDNASSE**MEEAK**ARLNEIIT**SSTK**AANSNESPEFPWM  
TDGAGLPPNASELLPELVKLTKKVTEQVR**LLAK**DEDEELTETSSYNVIPPYDQAKALGKINIDVDR IAA  
GLPCGSEGFLLMYARWRKLERDLYNERKDR**FDITQIPDVYDSCK**YDLLHNAHLNLEGLDELFK**VAQLLA**  
**DGVIPNEYGINPK**QKLIKIGSKIARRLLGKILIDLNRNTR EEAISVAELKSNQDQHSTSTKNEKEDADYQS  
KLFIKNEDTRRTSTSEISTDHDDDDDKETKYRLDPKYANVKTPERHVRTRLYFTSESHIHSLVNVLRYC  
NLDESLQEEDSLVCHNALERLHKT KELDYMSYIVLRMFENTEVPLEDPKRYR**IEMTYSR**GADLSPLEKN  
DSEANSLHQEHTLPIMGPER**LQEVGSYLTLEK**METMIRPFAMPAEDFPPPSTPAGFSGYFSKSAAVLER  
LVNLWPFHKHDKHASANGK

## Protein No.: I-195

**Protein name and Species:**

**Putative uncharacterized protein OS=Ricinus communis**

**GN=RCOM\_1341920 PE=4 SV=1**

**Accession: tr|B9RN01|B9RN01\_RICCO**

**Unused ProtScore: 10.23**

**Seq Cov %: 4.2**

**ITRAQ Changed Ratio:**

**117: 115=E3TL: D3TL=5.50**

**116: 114=E5TL: D5TL=2.29**

**Annotated typical Precursor MS Region:**

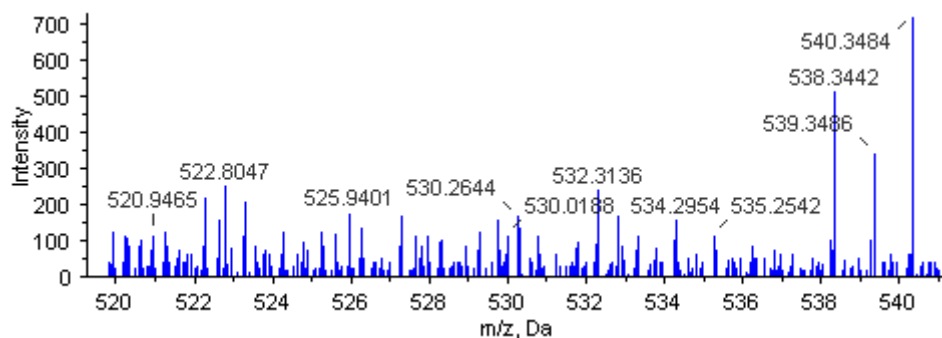

## Sequence Coverage and Matched peptides: in different color

MSIPKELEQVMKLRGGSVLGKKTILKSDHFPGCQNKRLTPQIDGAPNYRQADSLPVHGVAIPTTEGIRN  
VLKHIGAQKDGRVQVIWFNLREEPVYINGRPFVLRDVERPFSNLEYTGINRSRVEQMESRLKEDILM  
EAARYGNKILVTDELDPGQMVDQWEPVSRDSANEELQLEGYLFDYERVPVTDEKSPEEPDFDILVDKIY  
QADLNTEIIFNCQMGRGRTTTTGMVIATLVYLNRI GASGIPRTNSIGRVFDTGPTVTDNLPNSEEAIRRG  
EYAVIRSLTRVLEGGVEGKRQVDKVIDKCASMQLREAIANYRNRILRQPDEMKREASLSFFVEYLERY  
YFLICFAVYIHSERDALRSSSFHSSFADWMRARPELYSILRLLRRDPMGALGYASSKPSLMKIAESA  
DGRPHEMGVVAALRNGEVLGSQTVLKSDHCPCQIHTLPERVEGAPNFREVPGFPVYGVANPTIDGILS  
VIQRIGSSKGRPIFWHNMREEPVYIYINGKPFVLRREVERPYKNMLEYSGIDRERVQGMEARLKEDILRE  
AESYGGAIMVIHETDDGQIFDAWEHVNFDVSKTPLEVFKCLEVDGFP IKYARVPITDGKAPKSSDFDTL  
AVNIASASKDTAFVFNCQMGRGRTTTGTVIACLKLRIDYGRPIRVLVDDMACEEADSGSSSGEETGGN  
AARSPSNTMRMTGTEQARAFGIDDILLWKITRLFDNGVECREALDAVIDRCSALQNIHQAVLHRYK  
VNQQHVEPRVRRVALNRGAEYLERIFRLIAFAAYLGSEAFDGFQGESRMTFKTWLHQRPEVQAMKWS  
IRLRPGRFFTIPEELRAPQESQHGDVMEATIKARNGSVLGTGSILKMYFFPGQRTSSHLQIHGAPHVY  
KVDGYPVYSMATPTIAGAKEMLAYLGAKPNGEGLAQKVIITDLREEAVVYINGTPFVLRRELHKPVDTL  
KHVGITGPLVEHMEARLKEDIVSEVRESGGRMLLHREEYNPATNQSSVIGYWENIFANDVKTPAEVYAA  
LKDEGYDMTYRRIPLTRERDALASDVDAIQYCKDDCAGSYL FVSHTGFGGIAYAMAIICLRLGAEATFT  
AEIPQTLVDTESFSVHEEILPSQLSEEETFRMGDYRDILSLTRVLMYGPKSKADVDIVIDKCVGAGHLR  
DDILYYSKELRKCPHHDDEQLAHLMDMGVKALRRYFFLITFRSYLYCAKPTETRF TSWMNARPELGHL  
NNLRIDK

# Protein No.: I-197

Protein name and Species:

chitinase Class I, putative OS=Ricinus communis  
GN=RCOM\_0806420 PE=4 SV=1

Accession: tr|B9SIC4|B9SIC4\_RICCO

Unused ProtScore: 10.18

Seq Cov %: 24.9

ITRAQ Changed Ratio:

117: 115=E3TL: D3TL= 0.55

116: 114=E5TL: D5TL= 0.59

Annotated typical Precursor MS Region:

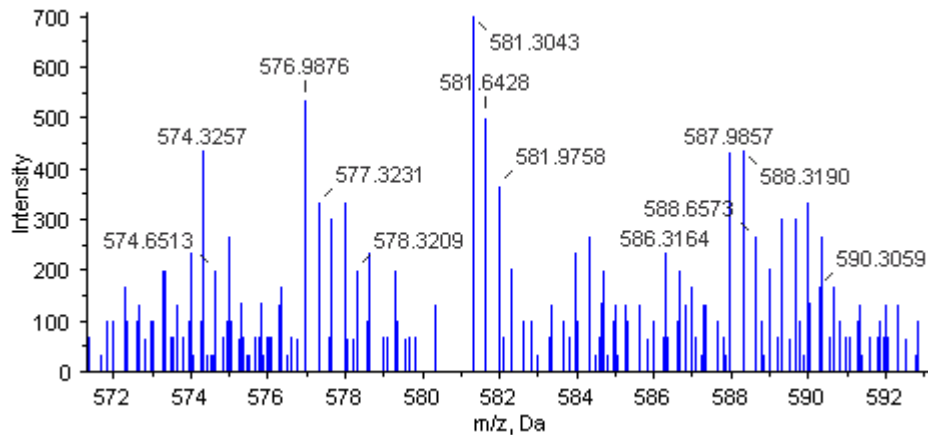

Sequence Coverage and Matched peptides: in different color

MLPKMEVYAFTVFYIFFSFLLGGLAEQCGRQADGALCPGGLCCSQYGWCGNTDPYCGGGCQSQC GGGGG  
GGGGDLGSIISRSTFDQLLKHRNDGACPGKGFYTYDAFISAAKDFPGFGTTGDVATRKG EIAAFFGQTS  
HETTGGWPSAPDGPYAWGYCFIREQNPGSYCSPSSSTYPCAPNKQYYGRGPIQLTWNYNYGQCGR AIGVD  
LLNNPDLVATDPVVISFKAAIWFWMTPQSPKPSCHDVTITGRWSPSAADR SAGRLAGYGVL TN IINGALEC  
GRGWDSRVDDRIGFYKRYCDLLGIGYGNNLDCYNQRSFGNGAFGLVDTM

# Protein No.: I-198

**Protein name and Species:**

**Stem-specific protein TSJT1, putative OS=Ricinus communis**

**GN=RCOM\_0910970 PE=4 SV=1**

**Accession: tr|B9RTJ4|B9RTJ4\_RICCO**

**Unused ProtScore: 10.16**

**Seq Cov %: 20.1**

**ITRAQ Changed Ratio:**

**117: 115=E3TL: D3TL= 0.52**

**116: 114=E5TL: D5TL= 0.31**

**Annotated typical Precursor MS Region:**

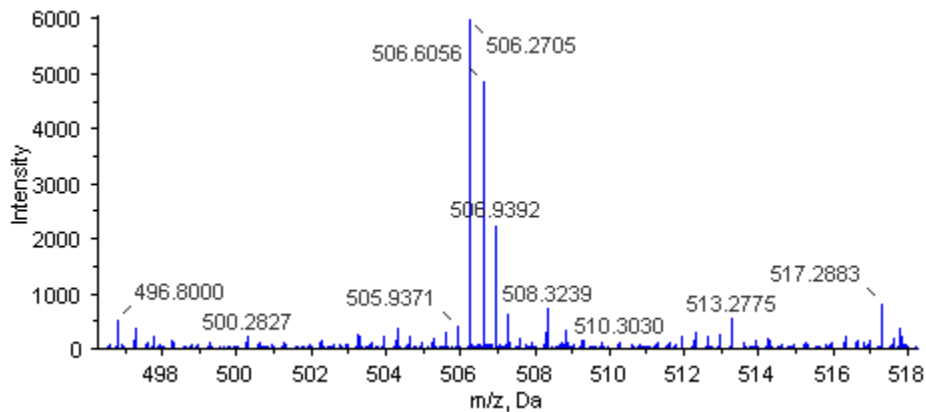

**Sequence Coverage and Matched peptides: in different color**

MLAVFDNTVAKCPDALQSPHSASSSALK**DGFLAK**HFGSIHPASVTVNLGTAGIIAYS�DK**QNPLLP**LF  
AVVDDIFCLFQGHIEI AVLK**QQYGLNK**TANEVIVIEAFRTL**DRGPYPADQVVR**DIQ**GF**AVLYDS  
**TSKATF**IAADADGSPFFWGADSERHLVLSDDAQILQQACGK**SFAPFPKGCFFTTSGGLR****SYEHPLNEL**  
**KPVPRV**DSS**QVCGATFK**VDAETKKEGGMPRVGSAYDSSNY

# Protein No.: I-204

**Protein name and Species:**

**Pyruvate kinase OS=Populus trichocarpa**

**GN=POPTRDRAFT\_563414 PE=2 SV=1**

**Accession: tr|A9PFJ7|A9PFJ7\_POPTR**

**Unused ProtScore: 9.98**

**Seq Cov %: 21.7**

**ITRAQ Changed Ratio:**

**117: 115=E3TL: D3TL= 1.85**

**116: 114=E5TL: D5TL= 1.56**

**Annotated typical Precursor MS Region:**

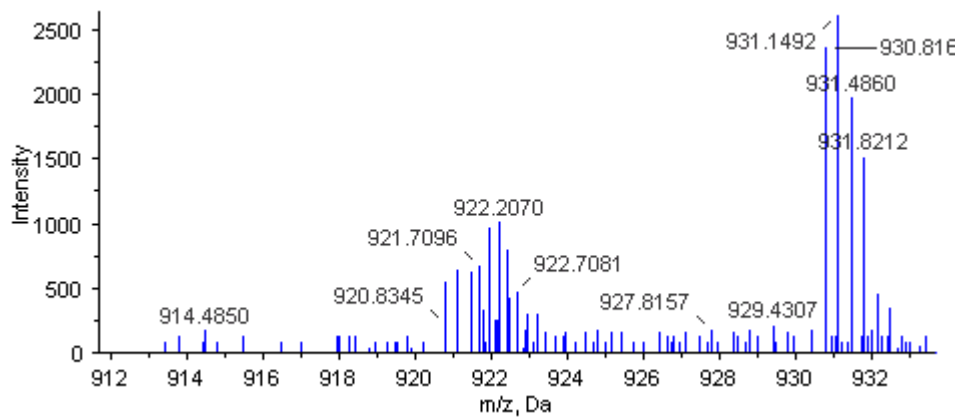

## Sequence Coverage and Matched peptides: in different color

MANID**IEGLLK**EHQDDEEGRVPRTKIVCTLGPSSRSVPMLEKLLRAGMNVARFNF~~SHGT~~THEYHQETLNN  
LRIAMQNTN**LLAAVMLDTK**GPEIIRTGFLKDGNP IQLKEGQEITITTTDYSIK**GDTDMISMSYK**KLPVDIK  
PRNTILCADGTITLTVLSCDPKAGTVRCRCENTAMLGERKNVNLPGVVVDLPTLTDKDKEDILGWGVPN  
N**IDMIALSFVR**KGSDLVNVKVLGPHAK**HIQLMSK****VENQEGVVNFDEILR**ETDSFMVAR**GDLGMEIPVE**  
**KIFLAQK**MMIYKCNIVGK**PVVTATQMLESMIK**SPRPTR**AEATDVANAVLDGTCVMLSGESAAGAYPEL**  
**AVK**TMRRICIEAESSLDYAAIFKEMIR**STPLMSPLES**LASSAVR TANK**ARAK**LIVVLTRGGTTAKLVA  
KYRPAVPILSVVVPVLTTSDFDWTCSDETPARHSLIYR**GLIPLLAEGSAK**ATDAESTEVI EAALKSAT  
KRGLCKPGDAVVALHRIGAASVIKICLVK

# Protein No.: I-205

Protein name and Species:

Peptidyl-prolyl cis-trans isomerase OS=Hevea brasiliensis PE=2

SV=1

Accession: [tr|F8RW92|F8RW92\\_HEVBR](#)

Unused ProtScore: 9.88

Seq Cov %: 66.3

ITRAQ Changed Ratio:

117: 115=E3TL: D3TL= 0.66

116: 114=E5TL: D5TL= 0.75

Annotated typical Precursor MS Region:

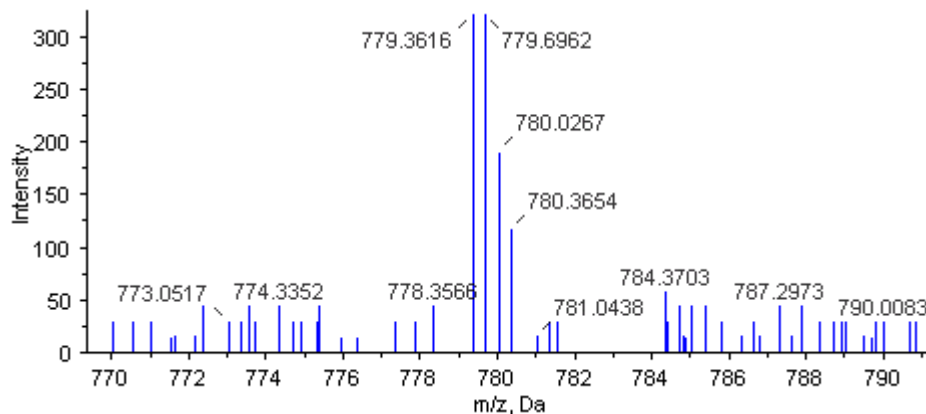

Sequence Coverage and Matched peptides: in different color

MANPKVFFDMSVGGHPAGKIVMELYADVVPRTAENFRALCTGEKGIGKSGKPLHYKGSSFHRVIPGFMC  
QGGDFTAGNGTGGESIYGAKFADENFTKHTGPGVLSMANAGPGTNGSQFFVCTAKTEWLDGKHVVFQ  
VVEGMDVVKALEKVGSSSGRTSKPVVIADCGQLS



## Protein No.: I-208

**Protein name and Species:**

**Importin beta-3, putative OS=Ricinus communis**

**GN=RCOM\_1361100 PE=4 SV=1**

**Accession: [tr|B9T1E9|B9T1E9\\_RICCO](#)**

**Unused ProtScore: 9.79**

**Seq Cov %: 6.4**

**ITRAQ Changed Ratio:**

**117: 115=E3TL: D3TL= 3.31**

**116: 114=E5TL: D5TL= 2.11**

**Annotated typical Precursor MS Region:**

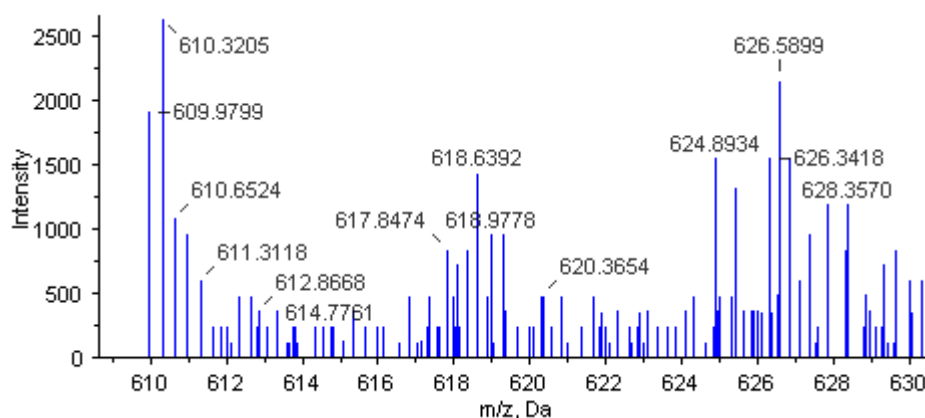

## Sequence Coverage and Matched peptides: in different color

MDESAQQLQLQQAQLAAAILGQDSAPFFETLISSLMSSSNEQRSQAEVLFNLCCKQTDPNLTLKLSHLLQF  
SPHVDARAMSAVLLRKLKLLTRDNHVVDVTDSSSYLWPR**LSLATQSSIK**SILLTSIQHESTKSILKKLCDT  
VSELAANILPDNGWPELLPFMFNCVSSDSAKLQESAFILIFAQLSQYIGESLIPFIKDLHTVFLQCLGSS  
PSFDVKIAALNAVINFIQCLTSSADRDRFQDLLPAMMRTLTEALNNGNEATAQEAELELLIELAGTEPRF  
LRRQLVDVVGSMLQIAEAEESLEEGTRHLAIEFVITLAEARERAPGMMRKLQPFI SRLFAILMRMLLDIE  
DDPAWHAENEDEDAGETSNYSVGQECLDRLAISLGGNTIVPVASEQLPAYLAAP EWQKHHAALIALAQ  
IAEGCSKVMIKNLEHVSMVLNSFHDPHPRVRWAAINAIGQLSTDLGPD LQNQYHQRILPALASAMDDF  
QNPRVQAHAASAVLNFSENCTPEILTPYLDG**IVSKLLVLLQNGKQMVQEGALTALASVADSSQEHFQKY**  
**YDAVMPYLK**TILVNATDKSNRMLRAKSMECISLVGMAVGKDKFREDAKQVMEVLM SLQGSQMETDDPTT  
SYMLQPDVTITSADSDNDIDDSDES METITLGDKR**IGIK**TSVLEEKATACNMLCCYADELKEGFFPWI  
DQVAPT**LVPLLLKFYFHEEVRKAAVSAMPELLR**SAKLAVEKGLSQGRNESYVKQLSDYIIPALVEALHKE  
PDTEICANMLDALNECLQISGTLVDEGQVRSIVDEIKQVITASSSRKKERADR**AKAEDFDAEEGELIKE**  
ENEQEEEFVDQVGEILGTLIKTFKASFLPFFDELSTYLTPMWGKDKTAEERR**IAICIFDDVAEQCRETA**  
LKYYDTYLPFLLEACNDENPDVRQAAVYGLGVCAEFGGSVFKPLVGEALSRLNVVIQHPNAKQSENVMA  
YDNAVSALGKICQFHRESINSAQIVPAWLNCLPITGDLIEAK**VVHEQLCSMVER**SDSELLGPNNQYLPK  
IVSVFAEVL CGKDLATEQTASR**MVNLLR**HLLQQLP PATLASTWSLLHPQQMALQSILSS

# Protein No.: I-210

**Protein name and Species:**

**Profilin OS=Mangifera indica GN=Man i 3.01 PE=2 SV=1**

**Accession: tr|Q2XPH2|Q2XPH2\_MANIN**

**Unused ProtScore: 9.66**

**Seq Cov %: 31.3**

**ITRAQ Changed Ratio:**

**117: 115=E3TL: D3TL= 1.67**

**116: 114=E5TL: D5TL= 1.53**

**Annotated typical Precursor MS Region:**

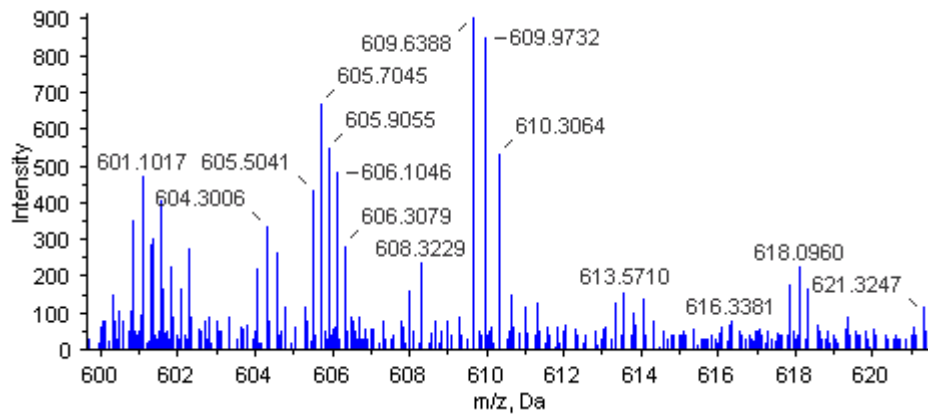

**Sequence Coverage and Matched peptides: in different color**

MSWQAYVDEHLMCDIEGHHLTAAAI VGLDGSVWAQSANFPKLNPEEIT**AINKDFDEPGSLAPTGLHLGG**  
**TKYMVIQGEPEGAVIRGKKGPGGVTVK**KTNMAFVIGIYDEPMTPGQCN**MIVER**LGDYLVEQGL

# Protein No.: I-212

**Protein name and Species:**

**Superoxide dismutase [Cu-Zn] OS=Hevea brasiliensis**

**GN=Cu/Zn-SOD PE=2 SV=1**

**Accession: tr|Q8GZP2|Q8GZP2\_HEVBR**

**Unused ProtScore: 9.6**

**Seq Cov %: 37.5**

**ITRAQ Changed Ratio:**

**117: 115=E3TL: D3TL= 0.35**

**116: 114=E5TL: D5TL= 0.72**

**Annotated typical Precursor MS Region:**

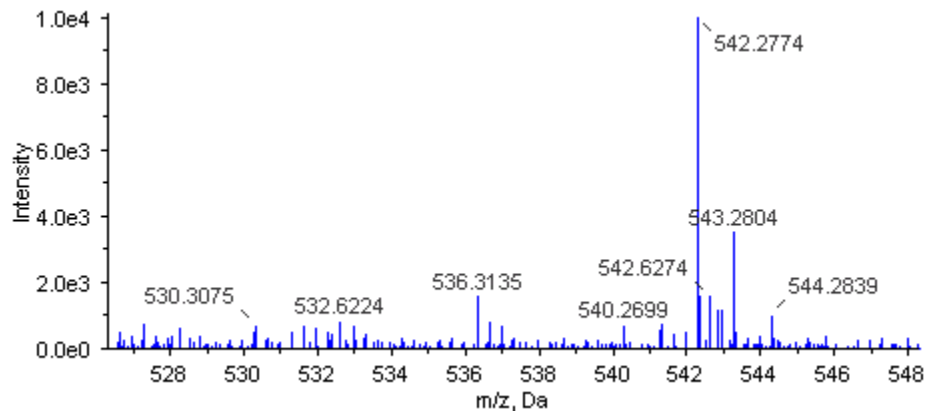

**Sequence Coverage and Matched peptides: in different color**

MLK**AVAVITSS**EGISGKIFFFTQEGDGPPTTVTGSVSGLKPGHLHGFVH**TFGDTTNGCLSTGLHFNPASKD**  
HGGPEDENR**HAGDLGNVNVGDDGTANFTIVDKHIPLSGPHSIAGR**SVVFHEGRDDLK**GGHEL**SKITGN  
AGDRIACGLIIGLQE

## Protein No.: I-213

**Protein name and Species:**

**Seryl-tRNA synthetase, putative OS=Ricinus communis**

**GN=RCOM\_1564380 PE=3 SV=1**

**Accession: tr|B9RXX9|B9RXX9\_RICCO**

**Unused ProtScore: 9.57**

**Seq Cov %: 13.9**

**ITRAQ Changed Ratio:**

**117: 115=E3TL: D3TL= 0.66**

**116: 114=E5TL: D5TL= 0.53**

**Annotated typical Precursor MS Region:**

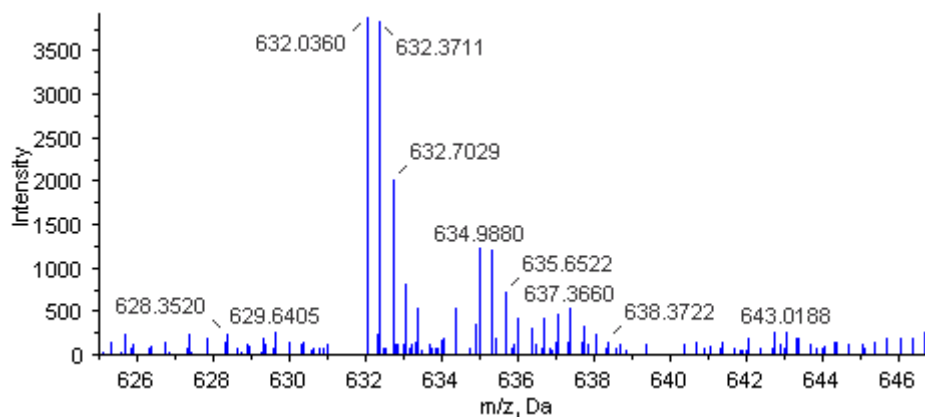

## Sequence Coverage and Matched peptides: in different color

MLDINLFR<sup>EDK</sup>GHNPQLIRESQRRRFANVNVVGEIILLDK<sup>EW</sup>RQR<sup>QYEL</sup>DNLR<sup>KDF</sup>NKINKLVAKLKIA  
GEDATEMIK<sup>DTNEN</sup>KRLTAEK<sup>EAQVQE</sup>AALALNK<sup>KLEEV</sup>GNLVHDSVPVSNDEANNAVIR<sup>VWGE</sup>KRLEP  
KLNHVDLVELLGIADTKKGAN<sup>NVAGGR</sup>GFYLGKGDVRLN<sup>QALIN</sup>VALDFLEKRGYTALQTPFFMRKDIM  
AK<sup>CAQLAQF</sup>DEELYK<sup>VTGEGE</sup>DKYL<sup>IATAEQ</sup>PLCAYHLDDWIHPSQLPIR<sup>YAGYSS</sup>CFR<sup>KEAGSH</sup>GRDT  
<sup>LGIFR</sup>VHQFEKVEQFCITSPNGNDSWDMHEEMIKNS<sup>EDFY</sup>KMLNIPYQVVAIVSGALN<sup>DAAAK</sup>KYDLEA  
WFPASNTYR<sup>ELVSC</sup>SNCTDY<sup>QSR</sup>KLEIRYGQKKNNEQAK<sup>QVHLLN</sup>STLTATERTLCCILENYQ<sup>KENG</sup>V  
E<sup>IPEPL</sup>RGYMGGKSFLPFQNNPPT<sup>EGK</sup>GKSKA

# Protein No.: I-216

**Protein name and Species:**

**Phospholipase D OS=Populus trichocarpa**

**GN=POPTRDRAFT\_829577 PE=3 SV=1**

**Accession: tr|B9GH43|B9GH43\_POPTR**

**Unused ProtScore: 9.47**

**Seq Cov %: 18.8**

**ITRAQ Changed Ratio:**

**117: 115=E3TL: D3TL= 0.36**

**116: 114=E5TL: D5TL= 0.77**

**Annotated typical Precursor MS Region:**

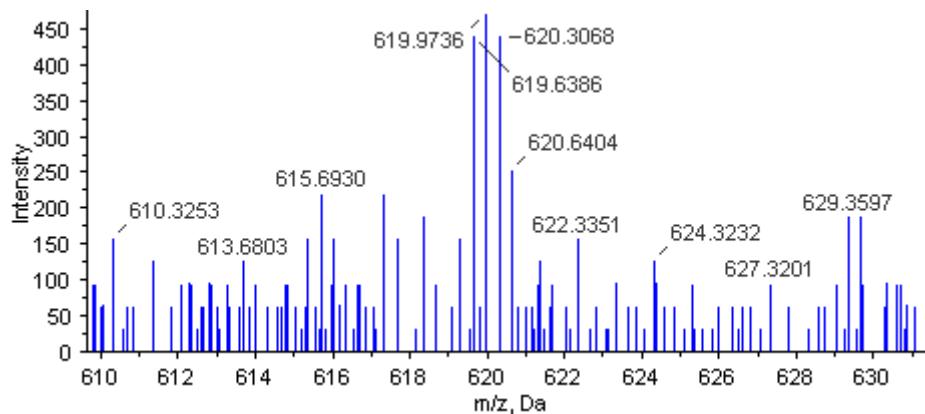

## Sequence Coverage and Matched peptides: in different color

MAQILLHGNLHVTTIYEVDKIGEGGGHGFHKLVGKVGEKVGIGNGISR**LYATIDLEK**ARVGRTR**ILENE**  
ATNPRWYESFHIYCAHMASNVIFTVK**DVNPIGATLIGR**AYIPVEEILDGEEIDRWVEILDGDKNPIRAG  
SKIHVKLQYFDITNDHNWGRGIRGSK**YPGVPYTFYSQR**QGCR**VSLYQDAHIPDKFIPK**IPLASGEYYEP  
HR**CWEDVFDAITNAK**HLLIYITGWSVYTEISLVRDSR**RPKPGGDITLGELLK**KKASEGVR**VLMLIWDDRT**  
**SVGLLK**RDGLMATHDEETEYHFQNTDVHCILCPRNPDDGGSIVQDLQISTMFTHHQ**KIVVDSAMPNGD**  
**SQRRRIVSYIGGIDLCDGRYDTPFHSLFRTLDTAHHDDFHQPNTGASIQK**GGPREPWHDHRSRLEGPI  
AWDVLFNFEQRWKKQGGK**DLLVQLR**ELEDVIIPSPVTPDDHETWNVQLFR**SIDGGAAFGFPETPEDA**  
**AKAGLVSGKDNIIDRSIQDAYINAIR**RAKNFIYIENQYFLGSSFCWS**ADGIK**PEDINALHLIPK**ELSLK**  
**IVSKIEAGER**FTVYVVVPMWPEGIPESASVQAILDWQRRTMDMMYKDVIQALRAKGLEEDPR**NYLTFFC**  
**LGNREVKKSGEYEPSEKPEPDSDYIR**AQEARR**FMIYVHAK**MMIVDDEYIIIGSANINQR**SMDGARDSEI**  
AMGGYQPYHLATRQPARGQIHGFRLGLWYEHGLMLDDTFLKPENEDCIR**KVNQIADK**YWDLYSSETLEG  
DLPGHLLRYPIGISSEGNVTELPGTEYFPDTKAR**VLGAK**SDYMPPILTT



# Protein No.: I-219

Protein name and Species:

14-3-3 protein 3 OS=Hevea brasiliensis PE=2 SV=1

Accession: [tr|F2YZ44|F2YZ44\\_HEVBR](#)

Unused ProtScore: **9.44**

Seq Cov %: **47.7**

ITRAQ Changed Ratio:

**117: 115=E3TL: D3TL=0.65**

**116: 114=E5TL: D5TL=0.66**

Annotated typical Precursor MS Region:

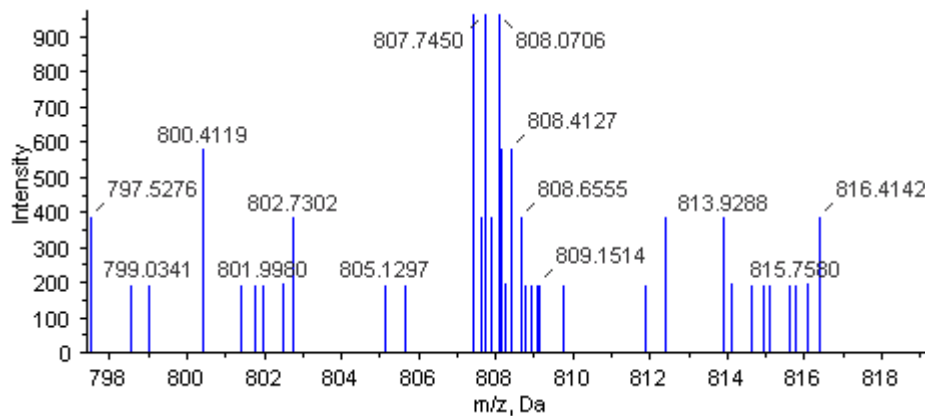

Sequence Coverage and Matched peptides: in **different color**

MAVAPSSR**EESIYMAKLA****EQAERYEEMVEFM**EVKSASVEKEELTVEERN**LLSVAYKNVIGARR**ASWR**II**  
**SSIEQKEESRGNENHVMIR**DYRAK**IESELSSICD**GILKLLDTRLIPPASPGDSK**VFYLMKGDYHRYL**  
**A**EFK**TGAERKEAAESTLTAYKSAQDIATAELAP**THPIR**LGLALNFSVFYYEILNSPDRACSLAKQAFDE**  
**AIAELDTLGEESYKDSTLIMQLLRDNLTLWTS**DIAD**EAGDEIK**EASKRESGEGQPQQ

## Protein No.: I-220

**Protein name and Species:**

Caffeic acid O-methyltransferase OS=Boehmeria nivea

GN=COMT PE=2 SV=1

**Accession:** [tr|Q14VV8|Q14VV8\\_BOENI](#)

**Unused ProtScore:** 9.44

**Seq Cov %:** 19.2

**ITRAQ Changed Ratio:**

**117: 115=E3TL: D3TL=0.61**

**116: 114=E5TL: D5TL=0.63**

**Annotated typical Precursor MS Region:**

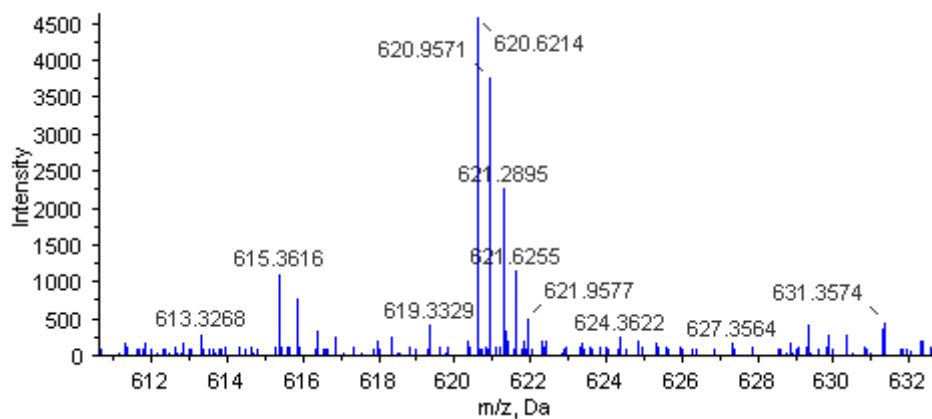

## Sequence Coverage and Matched peptides: in different color

MGSTGETQMTPTQVSDEEANLFAMQLASASVLPVLTAKTAEIDLL**EIIAK**AGPGAWLSPAETAAQLPTT  
NPAAPVMLDRILRLLACYSVVACQLRTLPGGAAER**LYGLAPVCKFLTK**NNDGVSISPLCLMNQDKVLME  
SWYYLK**DAVLEGGIPFNKAYGMTAFYHGTDP**RFNKVFNR**GMSDHSTITMK**KLLETYKGFEGLSVVDV  
GGGTGAVLSMIVSN**YPSIK**GINFDLPHVIEDAPAYPGVEHVGGDMFVSVPK**GDAIFMK**WICHDSDEHC  
LKFLKSCYDALPNNGKVIVAECILPVAPDTSLATK**GVAHIDVIMLAHNPGGKERAEKEFQALAKGAGFQ**  
**GFRVCSAFNTYVMEFLK**KP

# Protein No.: I-221

Protein name and Species:

Pathogenesis-related thaumatin (Fragment) OS=Populus  
deltoides GN=PR52-1 PE=4 SV=1

Accession: [tr|D2JWP4|D2JWP4\\_POPDE](#)

Unused ProtScore: 9.34

Seq Cov %: 35.3

ITRAQ Changed Ratio:

117: 115=E3TL: D3TL= 0.28

116: 114=E5TL: D5TL= 0.53

Annotated typical Precursor MS Region:

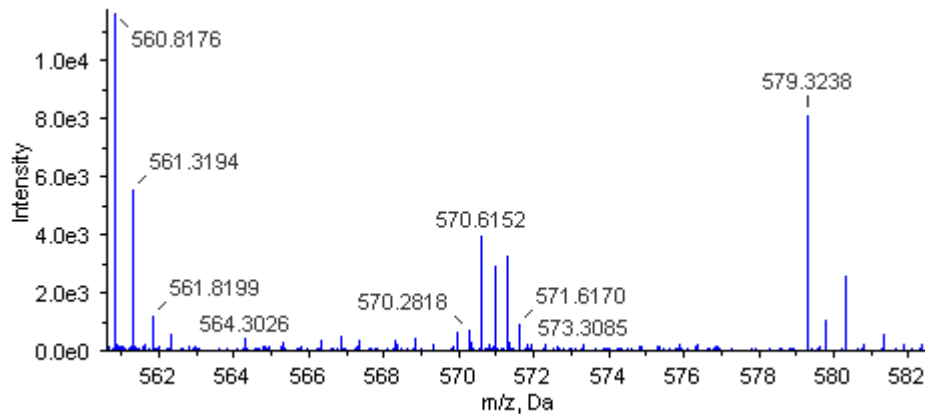

Sequence Coverage and Matched peptides: in different color

MSHLTKFLTSSLLFSLLIISTNAAT**FEIR**NNCPYTWAAASPGGRRLLDRGQTWYLNVPAGTSMAR**I**WG  
R**TNCNFDGSGR**GRCQGTGDCTGGLECKGWGVPNTLAEYALNQFGNLDYDISLVDGFNIPME**FSPTSSG**  
**GSGK**CQALLCTADINGQCPNELR**APGGCNNPCTVFK**TNEYCCTNGQGSCGPTYF**SRFFKDR****CPTSYSYP**  
**QDDPSSTFTCPGGTNYR**VIFCPWGSPPHFPLEMVE

# Protein No.: I-224

**Protein name and Species:**

**Glutathione transferase, Lambda class OS=Populus trichocarpa**

**PE=2 SV=1**

**Accession: tr|D2WL72|D2WL72\_POPTR**

**Unused ProtScore: 9.24**

**Seq Cov %: 32.6**

**ITRAQ Changed Ratio:**

**117: 115=E3TL: D3TL= 0.52**

**116: 114=E5TL: D5TL= 0.61**

**Annotated typical Precursor MS Region:**

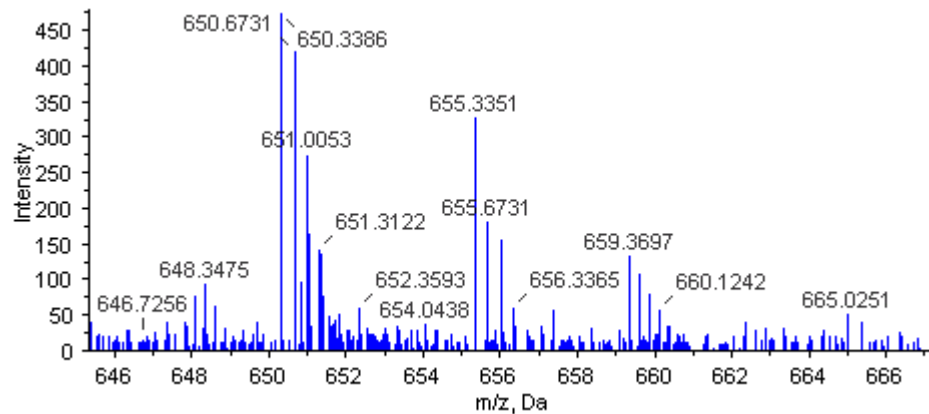

**Sequence Coverage and Matched peptides: in different color**

MELPRLYTCYTCPFAHR**VW**ITRNFKGL**LQDEIK**LVPLILQNRPAWYSEKVVPPNK**VPSLEHNGKITGESL**  
**DLIK**YLESNFQGPSLLPEDPAKK**EFAEELFSYTD'TFNRTVFT'SFK**GDPAAK**EAGPAFDHLENALHK**FGDG  
PFFLGQEF**SLVDIAYIPFVER**FCIFLSEVFK**YDI**TAGRPK**LAAWIEELNK****IEAYK**QTKTDPKEMVEVYK  
KRFMA

# Protein No.: I-226

Protein name and Species:

Latex cystatin OS=Hevea brasiliensis PE=4 SV=1

Accession: [tr|E8Z9H3|E8Z9H3\\_HEVBR](#)

Unused ProtScore: 9.2

Seq Cov %: 32.7

ITRAQ Changed Ratio:

117: 115=E3TL: D3TL= 0.57

116: 114=E5TL: D5TL= 0.52

Annotated typical Precursor MS Region:

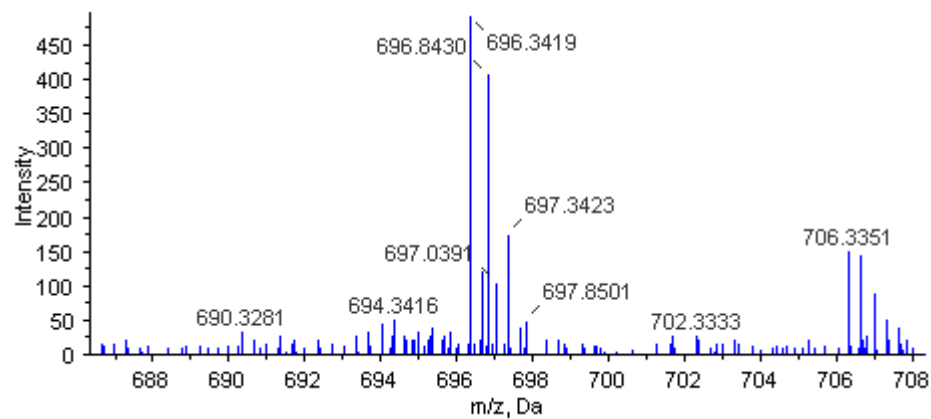

Sequence Coverage and Matched peptides: in different color

MAKLGGVK **EV**EGSANS**VE**INSLARYAVDDYN**QK**QNAL**LE**FK**KVV**NAKQQVVAGTIYYITL**EV**IDGG**Q**KK  
V**YE**AKV**WE**K**PWL**N**F**KE**VQ**EF**KL**IGDAPSD**STA**

# Protein No.: I-227

Protein name and Species:

Rab4 OS=Hevea brasiliensis PE=2 SV=1

Accession: [tr|F2VXU6|F2VXU6\\_HEVBR](#)

Unused ProtScore: 9.17

Seq Cov %: 40.6

ITRAQ Changed Ratio:

117: 115=E3TL: D3TL=0.17

116: 114=E5TL: D5TL=0.40

Annotated typical Precursor MS Region:

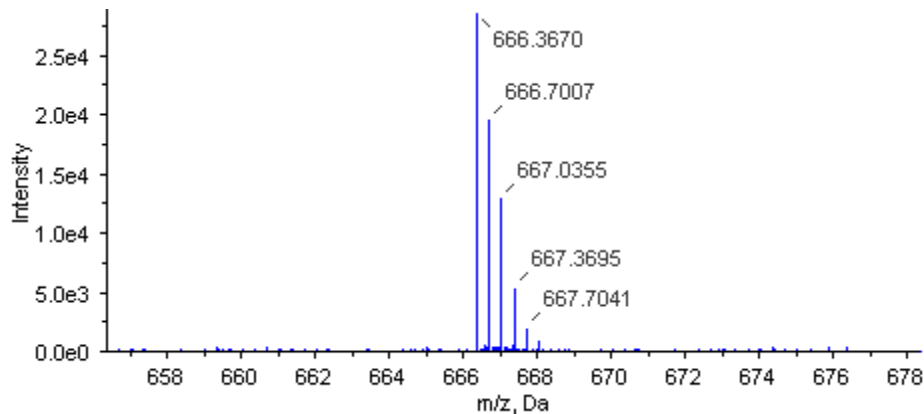

Sequence Coverage and Matched peptides: in different color

MSNEYDYLFKLLLIGDSSVGKSCLLLRFADDSYVDSYISTIGVDFKIRTVELDGKTIK LQIWDTAGQER  
FR TITSSYYRGAHGIIIVYDVTEMESFNNVKQWLNEIDRYANDSVCKLLVGNKCDLVDNKVVDTQTAKA  
FADELGIPFLETSAKDSINVEQAFLTMAGEIKKMGSPAAASKSTGTTVQMKGQPIQQKNNCCG

# Protein No.: I-230

**Protein name and Species:**

**6-phosphofructokinase      3      OS=Populus      trichocarpa**

**GN=POPTRDRAFT\_866992 PE=4 SV=1**

**Accession: tr|B9H8X6|B9H8X6\_POPTR**

**Unused ProtScore: 9.12**

**Seq Cov %: 14.9**

**ITRAQ Changed Ratio:**

**117: 115=E3TL: D3TL= 0.54**

**116: 114=E5TL: D5TL= 0.62**

**Annotated typical Precursor MS Region:**

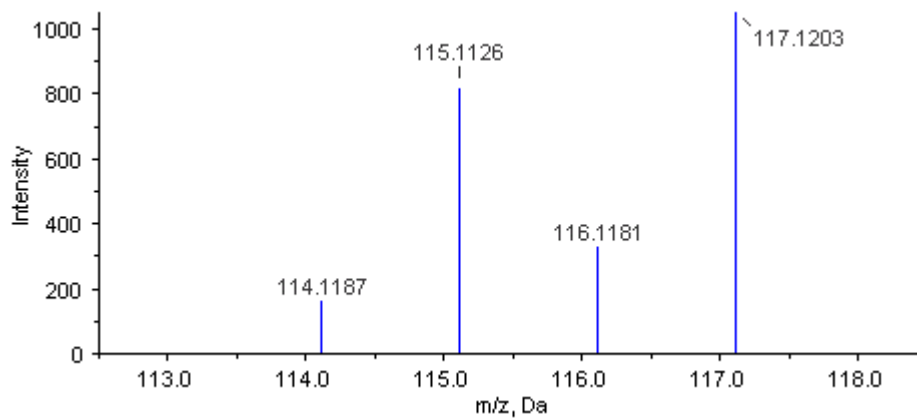



## Sequence Coverage and Matched peptides: in different color

MASNDVSKPKIITGDFGYVLEDVPHFTDYIPDLSTYSNPLQDNPAFCVVKQYFVHVDDSVPOKIVVHKD  
SPRGIHFRRAGPRQKVYFDSDEVHACIVTCGGLCPGLNTVIREIVYSLYHMYGVTTVLGIDGGYRGFYA  
RNTIALTPKVVNDIHKRGGTILGTSRGGHDTSKIVDSIQDRGINQVYIIGGDGTQK**GASVIFEEIR**RRG  
LKVVV**AGIPK****TIDNDIPVIDK****SFGFDTAVEEAQRAINAAHVEAESVENGIGLVK**LMGRYSGFIAMYATL  
ASRDVDCCLIPESPFYLDGKGGLFEYIEKQLKENGHMVIVIAEGAGQELLESEMQSRNQDASGNKLLQ  
DVGLWISQGIKDYFSRQKTMAINLK**YIDPTMIR**AVPSNASDNVYSTLLAQSAVHGAMAGYTGFTSGLV  
NGR**QTYIPFYR**IIEKQNK**VVITDR**MWARLLSSTNQPSFMSDKDVIEDKTECISGEKKEEDPATQFLDNG  
NRADGVLENKEVSSV

# Protein No.: I-241

**Protein name and Species:**

**Acyl-CoA-binding protein (Fragment) OS=Jatropha curcas**

**PE=2 SV=1**

**Accession: tr|D6BR55|D6BR55\_9ROSI**

**Unused ProtScore: 8.78**

**Seq Cov %: 35.9**

**ITRAQ Changed Ratio:**

**117: 115=E3TL: D3TL= 0.40**

**116: 114=E5TL: D5TL= 0.58**

**Annotated typical Precursor MS Region:**

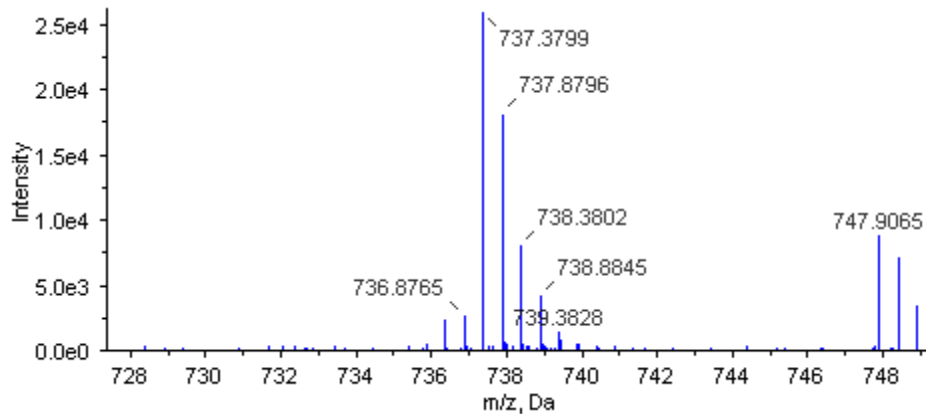

**Sequence Coverage and Matched peptides: in different color**

**MGLKEEFEEYA**AK**TL**PENT**TNEN**KL**LILYGL**LFK**QATVGPVNTSR****PGMFNMR**DRAKWD**AWKAVEGKSKE**  
**EAMSDYITK**VKLLLEEEAAAAASA

# Protein No.: I-242

**Protein name and Species:**

**Actin-depolymerizing factor OS=Hevea brasiliensis GN=ADF**

**PE=2 SV=1**

**Accession: tr|D9I9X9|D9I9X9\_HEVBR**

**Unused ProtScore: 8.71**

**Seq Cov %: 61.9**

**ITRAQ Changed Ratio:**

**117: 115=E3TL: D3TL= 0.58**

**116: 114=E5TL: D5TL= 0.58**

**Annotated typical Precursor MS Region:**

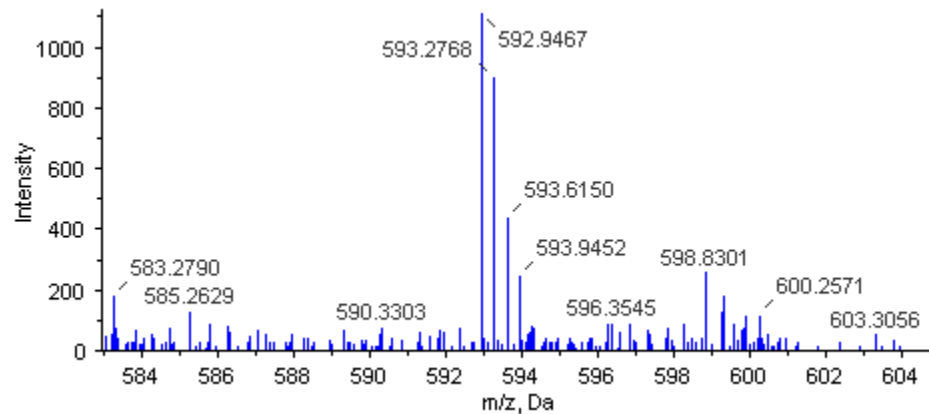

**Sequence Coverage and Matched peptides: in different color**

MANAASGMAVHDDCKLR**FLE**ELKAKR**TYR****YIV**FKIEEKAK**QVIVE**KL**GEPTQ**SYEDFTASLPAD**ECRYAV**  
**YDFDFVTEENCQKSR**IFFIAWSPD**TSR**VR**SKMIYASSKDR**FKR**ELDGIQVELQATDPTE**MGLD**VFK**SRA  
S

## Protein No.: I-244

**Protein name and Species:**

**Proteasome subunit alpha type OS=Ricinus communis**

**GN=RCOM\_1595040 PE=3 SV=1**

**Accession: tr|B9R7X1|B9R7X1\_RICCO**

**Unused ProtScore: 8.65**

**Seq Cov %: 23.3**

**ITRAQ Changed Ratio:**

**117: 115=E3TL: D3TL=1.61**

**116: 114=E5TL: D5TL=1.50**

**Annotated typical Precursor MS Region:**

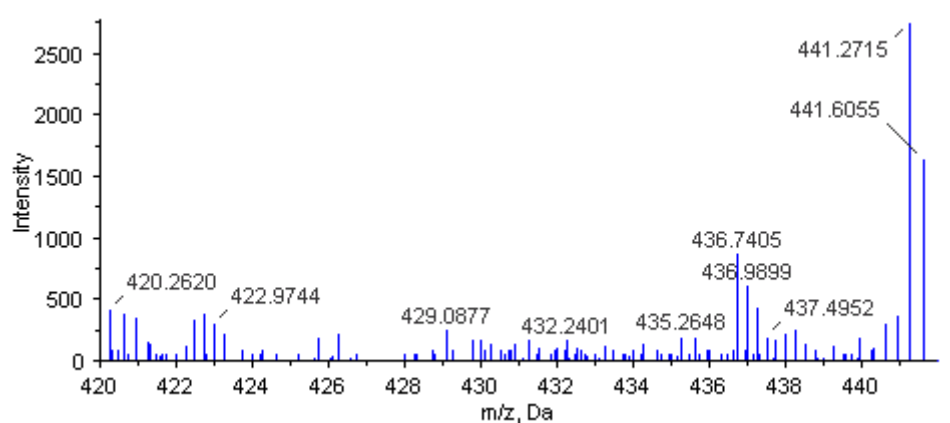

## Sequence Coverage and Matched peptides: in different color

MFRN**QYD****TDV****TTW****SPAG****RLFQ****VEYAMEAVKQGSAAIGLR**SK**THVVLACV****NKANSELSSHQ**KI**FKVDDH**  
**IGVAIAGLTADGR**VLSRYMR**SECINYSFTYESPLPVGR****LVVQLADK**AQVCTQ**RSWKR**YPYGV**GLLVAGLD**  
ESGAHLYY**NCPSGN**YFEYQAF**IGSR**SQA**AKTYMER****RFENFMDSSR**DDLIKDALIAV**RETLQGETLKSS**  
ICTVAVV**GVGEAFH**VLDQ**ETVQQL**IDA**FEIVGEPEAPAAEPDAAAEGGGGAAADQG****GAAADQGGAAADE**  
**GVAPMDI**

## Protein No.: I-245

Protein name and Species:

ubiquitin-protein ligase 1 OS=Hevea brasiliensis PE=2 SV=1

Accession: [tr|F8RWS9|F8RWS9\\_HEVBR](#)

Unused ProtScore: **8.65**

Seq Cov %: **41.8**

ITRAQ Changed Ratio:

**117: 115=E3TL: D3TL=0.65**

**116: 114=E5TL: D5TL=0.70**

Annotated typical Precursor MS Region:

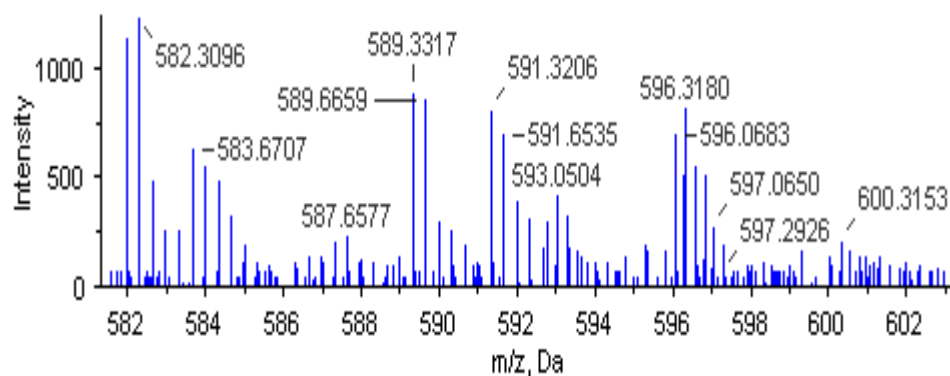

Sequence Coverage and Matched peptides: in **different color**

MTLGS<sup>green</sup>GGSS<sup>green</sup>VV<sup>green</sup>VP<sup>green</sup>RN<sup>green</sup>FR<sup>green</sup>LL<sup>red</sup>EEL<sup>red</sup>ER<sup>red</sup>GE<sup>red</sup>KG<sup>red</sup>IG<sup>red</sup>DG<sup>red</sup>TV<sup>red</sup>SY<sup>red</sup>GM<sup>red</sup>DD<sup>red</sup>DI<sup>red</sup>YMR<sup>red</sup>SW<sup>red</sup>TGT<sup>red</sup>II<sup>red</sup>GP<sup>red</sup>HNT<sup>red</sup>V<sup>red</sup>HE<sup>red</sup>GR<sup>red</sup>IY<sup>red</sup>QL<sup>red</sup>K  
L<sup>red</sup>FC<sup>red</sup>DK<sup>red</sup>DY<sup>red</sup>PE<sup>red</sup>K<sup>red</sup>PP<sup>red</sup>SV<sup>red</sup>RF<sup>red</sup>HS<sup>red</sup>RIN<sup>green</sup>M<sup>green</sup>TC<sup>green</sup>VN<sup>green</sup>HET<sup>green</sup>GV<sup>green</sup>VE<sup>green</sup>PK<sup>green</sup>KF<sup>green</sup>GL<sup>green</sup>LAN<sup>green</sup>W<sup>green</sup>QR<sup>green</sup>EY<sup>red</sup>TM<sup>red</sup>EDI<sup>red</sup>L<sup>red</sup>T<sup>red</sup>QL<sup>red</sup>KE<sup>red</sup>MA<sup>red</sup>A<sup>red</sup>PH<sup>red</sup>NR<sup>red</sup>K<sup>red</sup>LV<sup>red</sup>  
QP<sup>red</sup>PEG<sup>red</sup>TY<sup>red</sup>F

## Protein No.: I-246

**Protein name and Species:**

**Plant synaptotagmin OS=Populus trichocarpa GN=NTMC2T1.2**

**PE=4 SV=1**

**Accession: tr|B9HR67|B9HR67\_POPTR**

**Unused ProtScore: 8.6**

**Seq Cov %: 12.1**

**ITRAQ Changed Ratio:**

**117: 115=E3TL: D3TL= 1.79**

**116: 114=E5TL: D5TL= 0.69**

**Annotated typical Precursor MS Region:**

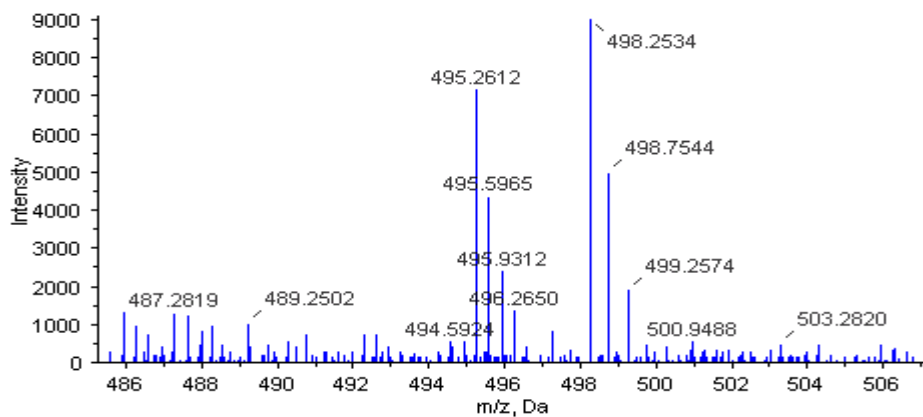

## Sequence Coverage and Matched peptides: in different color

MGFLSTISGFCGFGVGLSTGLTIGYYLFIYFQPTDVKDPEVR**PLAEQDSETLQR**ILPEIPLWVKNPDYD  
RIDWLNRFIQLMWPYLDKAICKTVKNIAKPIIAEQIPKYKIDAVEFETLTLGTLPPTFHGMK**VYVTDEK**  
**ELIMEPCIKWAGNPVTVAVK**AFGLK**ATAQVVDLQVFASPRITLKPLVPSFPCFAN**IYVSLMEKPHVDF  
GLK**LLGADLMSIPGLYR****VQEI****IK**DQVANMYLWPK**TLEVP****ILDP****AK**AMK**LKKK****DLMGASDPYVK**IKLTE  
DKLPAKKT**TVKHK**NLNPEWNEEFNLVVKDPESQALELRVYDWEQVGKHDR**MGMNVVPLK**DLTPEEPK**VM**  
**TLDLLK**NMDLNDPQNEKSRGQLMVELTYKPFKEDDLNKSFKDEVEQKAPEGTPAGGLLVVTIHEAQDV  
EGKHHTNPYVRL**LFRG****EEMK**TKRVKKNRDPWEEEFQFTLEPPVNAKLH**VEVSTSSR**IGLLHPKESL  
GYVEINLSDVVSNNRRINERYHLIDSKNGKIQIELQWRPAS



## Protein No.: I-247

**Protein name and Species:** P5CS, Delta  
1-pyrroline-5-carboxylate synthetase, putative OS=Ricinus  
communis GN=RCOM\_1482350 PE=3 SV=1

**Accession:** tr|B9SE11|B9SE11\_RICCO

**Unused ProtScore:** 8.57

**Seq Cov %:** 6.7

**ITRAQ Changed Ratio:**

**117: 115=E3TL: D3TL= 2.03**

**116: 114=E5TL: D5TL= 1.66**

**Annotated typical Precursor MS Region:**

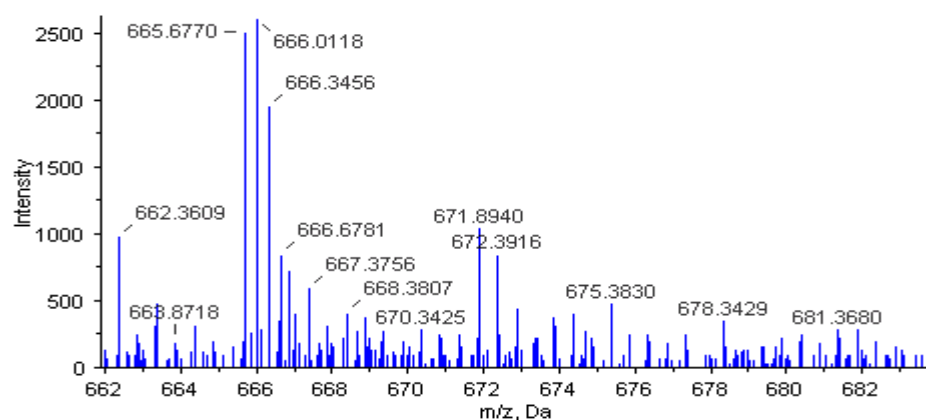

## Sequence Coverage and Matched peptides: in different color

MNGGMDRSR**AFVK**DKVRLVIKVGTA>VVTRGDGRLALGRLGAFCEQVKELNSQGYEVIVVSSGAVGLGRQ  
RLRYRKLVNSSFADLQKPQVEIDGKASAAVGGSSLMALYDTMFSQLDVTSAQLLVTDNDFRDKDFRKQL  
NETVE**SLLSLRVIP****IFNENDAVSTR**KAPYEDASGIFWDNDSLAL**LAL****ELK**ADLLVLLSDVDGLYSGPP  
SDPRSKLIHTYIKEIHHGEITFGDKSRVGRGGMTAKVKA>VNAAYAGIPV>IITSGFARENILKVLQGER  
VGTLFHQDAHIWVPIKEVCGREMAVAARESSRRLQALSSQERKRILLDIADALEANEEQIKIENEADVA  
AAQLAGLEKSLISRLALKSGKIKSLANSIRVLANMEDPI**CVLK****RTELADGLLLEK**TSSPLGVLLIIFE  
SRPDALVQIASLAIRSGNGLLLKGGKEAKRSNEILHKIITAAI**PE****TIGGKLI****GLVTSR**DEIPDLL**KLDD**  
**VIDLVIPR**GSNKLVSQIKASTKIPVLGHADGICHVYVDKSNMEMAKRIVLDA**KIDYPAACNAME****TLV**  
**HKDLVQTGGLNELTVDLR**TEGVNLYGGPRASKELNVPEVDSFHHEYNMACTIEIVDDVYAAIEHIHEH  
GSAHTDCIITEDHEVAEVFLC**QVDSAAVFHNASTR****FSDGAR**FGLGAEVGI**STSR**IHAR**GPVGVEGLLTT**  
**R**WILRGNGQVVDGDKGVIYTHKDVTHIHSNGFVPASLTKEDN

## Protein No.: I-248

### Protein name and Species:

adenosine kinase 2 [Vitis vinifera] OS=Vitis vinifera

GN=VIT\_13s0019g04480 PE=4 SV=1

Accession: [tr|F6HNF4|F6HNF4\\_VITVI](#)

Unused ProtScore: 8.56

Seq Cov %: 16.7

### ITRAQ Changed Ratio:

117: 115=E3TL: D3TL= 0.34

116: 114=E5TL: D5TL= 0.50

### Annotated typical Precursor MS Region:

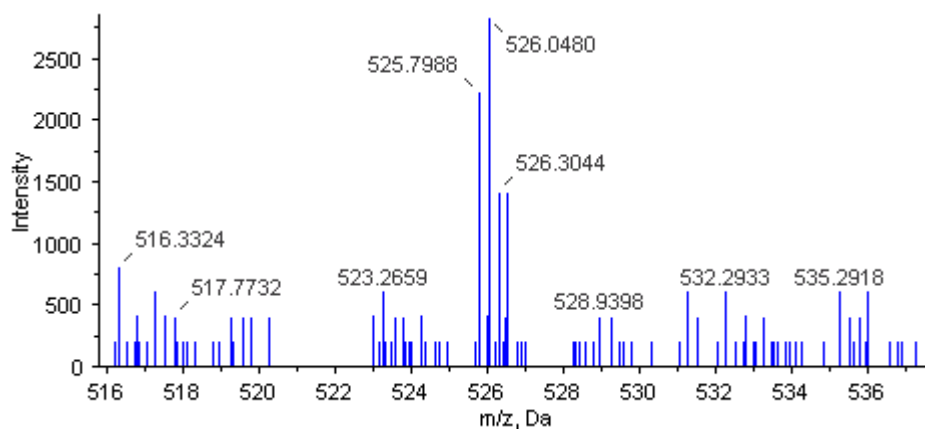

## Sequence Coverage and Matched peptides: in different color

MAYEGILLGMGNPLLDISSVVDEEFLQRYDIKLNNAI**LAEDK**HL**PMYDEM**ASKYNVEYIAGGATQNSIR  
VCQWMLQIPGATSYMGCIGKDK**FGEEMK**KNSKLAGVNVHYREDETAPTGTCAVCVVGGER**SLIANLSAA**  
**NCYK**SEHLKRPENWALVEKAKYFYIAGFFLTVSPESILLVAEHAAANNKVFMMNLSAPF**ICEFFK**DQQE  
K**ALPYMDYVFGNETEAR**TFSR**HGWETDNVEELAIK**ISQWPKASGTHKR**ITVITQGADPVVVAEDGK**VK  
SFPV**ILLPKE**KLVDTNAGDAFVGGFLSQLVQEKPIEECVRAGCYASHVIIQR**SGCTYPEKPDFS**

## Protein No.: I-256

**Protein name and Species:**

**Fructose-bisphosphate aldolase OS=Populus trichocarpa**

**GN=POPTRDRAFT\_832739 PE=3 SV=1**

**Accession: [tr|B9HJ73|B9HJ73\\_POPTR](#)**

**Unused ProtScore: 8.36**

**Seq Cov %: 19.2**

**ITRAQ Changed Ratio:**

**117: 115=E3TL: D3TL=0.66**

**116: 114=E5TL: D5TL=0.75**

**Annotated typical Precursor MS Region:**

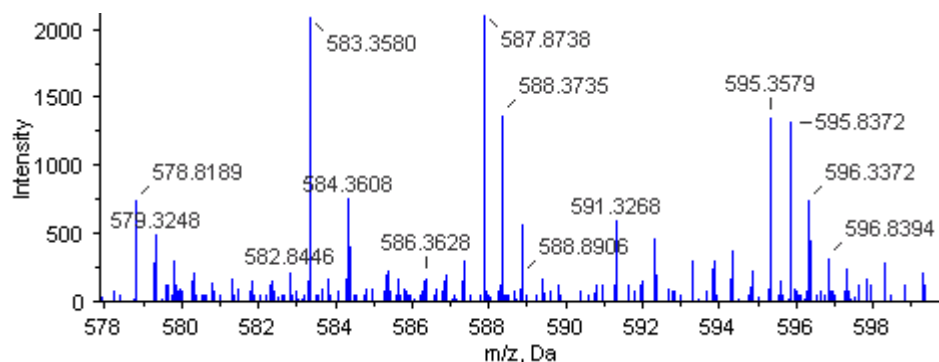

## Sequence Coverage and Matched peptides: in different color

MACASFVKLNAASSSWGKSSFGK**RSPGSSTRR**VSFSIRASSYTDELVQTAKLIASPGR**GILAI****DES**  
**ATCGK**RLASIGLDNTEETNRQAYRQLLLTTPGLGEYISGAILFEETLYQSTTDGRK**FVDCL****RDENIVPGI**  
**KVDKGLVPLPGSNNESWCQGLDGLASR**SAEYKQGARFAKWR**TVVSIPCGPSALAVK****EAAWGLAR**YAAI  
SQDNGLVPIVEPEILLDGDHPIDRTLEVAEKVWAEVFYLAENNVVFEGILLKPSMVTPGAHEHKEKASP  
DTIAK**YTLTMLK**RRVPPAVPGIMFLSGGQSEVQATLNLNAMNQSPNPWHVSFSYAR**ALQNTVLK**TWQGR  
PENVEAAQKSLLVRAKANSLAQLGRYSAEGESEAKKGMFVKGYTY

## Protein No.: I-261

**Protein name and Species:**

Arginyl-tRNA synthetase, putative OS=Ricinus communis

GN=RCOM\_1049090 PE=3 SV=1

**Accession:** [tr|B9RKG2|B9RKG2\\_RICCO](#)

**Unused ProtScore:** 8.15

**Seq Cov %:** 14.2

**ITRAQ Changed Ratio:**

**117: 115=E3TL: D3TL= 0.53**

**116: 114=E5TL: D5TL= 0.96**

**Annotated typical Precursor MS Region:**

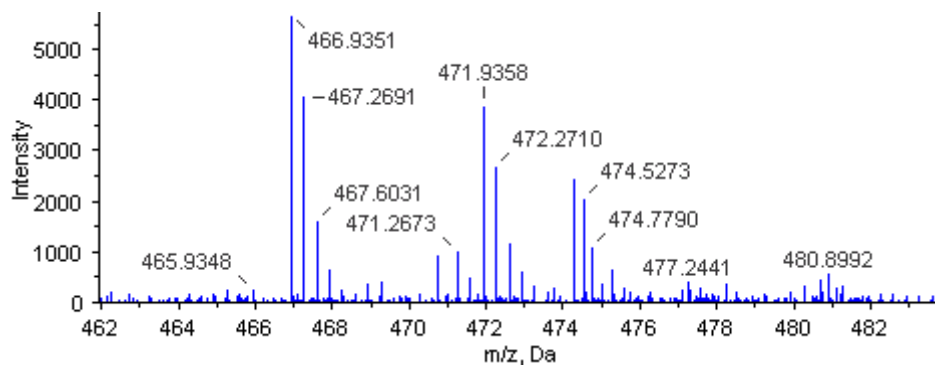

## Sequence Coverage and Matched peptides: in different color

MATNAENEDNVGNLKKQIAK**LF****EASLR****ETVPSEPDVEPLVA****ACTAK**FGDYQCNNAMSLWSKIKGKNTEF  
K**GPPAVGQAIMKNLPPSEVIESCSVAGPGFVNVL****SK**KWMSKKIQKMLIDGIDSWAPKLLVKKR**AVVDF****S**  
**SPNIAK**EMHVGHLRSTIIGDTLAR**MLEFSK**VDVLRRNHVGDWGTQFGMLIEFLFEK**FPNFEDVNERAIG**  
**DLQAFYK**ASKQRFDADSEFKERAQKAVVRLQGGEPKYRQAWAQICDISRKEFDKVYQR**LGVQLEEK**GES  
FYNPYIPGIIDALSNQGLVEESEGARVIFIEGVNIP**LIVVK**SDGGFNYASTDLTALWYRLNEEKAEWII  
YVTDVGQQQHFDVMVFKAASWLPADDSMFPKASHVGFGLVLG**DDGK**RFRTRATEVVR**LVDLLDEAK**T  
RSKAVL**VERGK**AEEWTEQELEQIAEAIGYGAVKYADLKNNRLTNYTFNYDQMLNDK**GNTAVYLLYAHAR**  
**ICSIIRK**SGRDMEELKKGSLVLDHPDERSLGLHLLQFAETVEEACTNLLPNVLCEYLYNLSEYFTKFI  
SNCKVVESPEETSRLLLCEATAVVMRKCFFLLGIVPVYKI



## Protein No.: I-262

**Protein name and Species:** Carotenoid cleavage dioxygenase 1

**OS=Manihot esculenta GN=CCD1 PE=2 SV=1**

**Accession:** [tr|E2DQG6|E2DQG6\\_MANES](#)

**Unused ProtScore:** 8.15

**Seq Cov %:** 10.3

**ITRAQ Changed Ratio:**

**117: 115=E3TL: D3TL= 0.20**

**116: 114=E5TL: D5TL= 0.65**

**Annotated typical Precursor MS Region:**

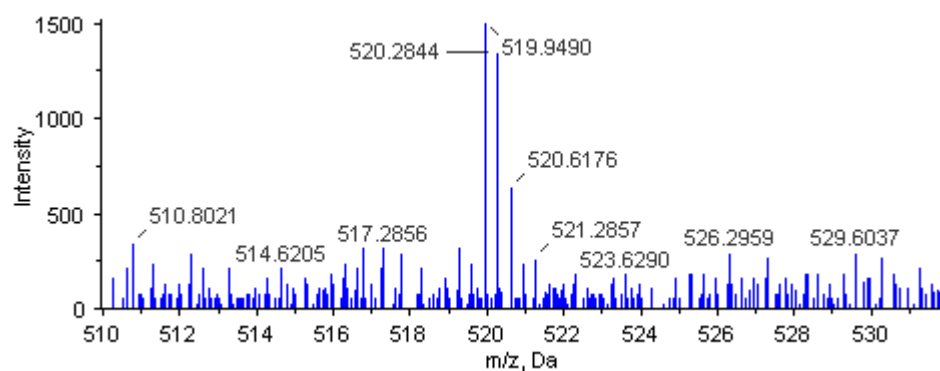

## Sequence Coverage and Matched peptides: in different color

MAEEKSEVEKKQGNSGGAGVPIVEVKPKPRKGLASK**FVDLL**EKLIVKLMFDASKPLHYLSGNFAPVTDE  
TPPVRDLSVKGHLDPDCLNGEFVVRVGPNPKFAPVAGYHWFDDGDMIHGMR IKNGKATYVRRYVRTSR**IQQ**  
**EEFFGGSK**IMKVGDLKGLFGLFMVNMQILRAKLVLDMSYNGTANTALIYHHGK**LLALQEADKPYVVK**  
**VLEDGDLQTVGMLDYDK**RLKHSFT**AHPK**VDPNTGEMFTFGYAHEPPYITYRVISKDGMHDPVPIITISD  
PIMMHDFAITENYAIFLDLPLYFRPKEMVKDKKLIFFDATKKARFGVLPYAKDDHQIRWFELPNCFI  
FHNANAWEEDEEVVLIITCRLENPDLDMVSGNVKEKLENFANELYEMRFNMKTGVASQKRLSAPAVDFPR  
**VNESYTGRKQRYVYGTILDSIAKVTGI IKFDLHAEPQQGK**TK**LEVGGNIKGIFDLGPGR**FGSEAVFVPR  
EPGTSSEEDDGYLIFFTHDENTGKSSVNVIDAK**TMSSDPVAVVELPHR**VPYGFHAFVTEEQQLQAQATL

# Protein No.: I-264

Protein name and Species:

Glutaredoxin OS=Hevea brasiliensis PE=4 SV=1

Accession: [tr|B3FNP8|B3FNP8\\_HEVBR](#)

Unused ProtScore: 8.09

Seq Cov %: 43

ITRAQ Changed Ratio:

117: 115=E3TL: D3TL=0.28

116: 114=E5TL: D5TL=0.31

Annotated typical Precursor MS Region:

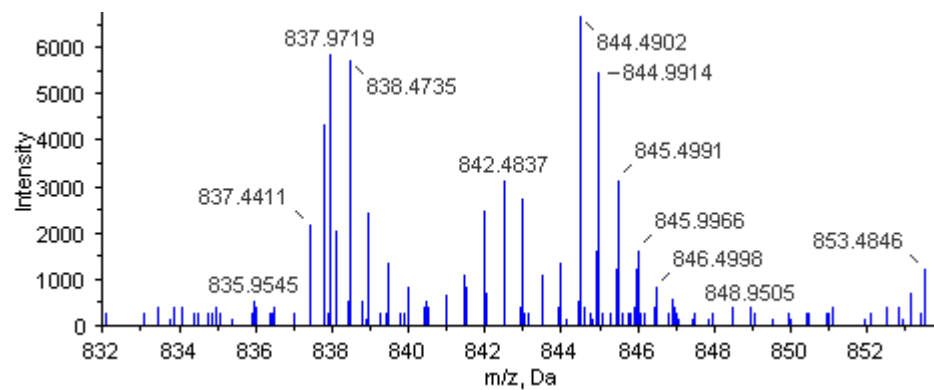

Sequence Coverage and Matched peptides: in different color

MAMTKAKELVSSNSVVVFSKTYCPYCTSVKLLDELGANYKTVELDTEGDGSQVQSALAEWTGQRSVVPN  
VFISGKHIGGCDTTTGMHKEGKLIPLLLTEAGALAKASA

# Protein No.: I-266

**Protein name and Species:**

ras-related protein RABA3 OS=Ricinus communis

GN=RCOM\_0143940 PE=3 SV=1

**Accession:** tr|B9T509|B9T509\_RICCO

**Unused ProtScore:** 8.05

**Seq Cov %:** 42

**ITRAQ Changed Ratio:**

**117: 115=E3TL: D3TL= 0.46**

**116: 114=E5TL: D5TL= 0.58**

**Annotated typical Precursor MS Region:**

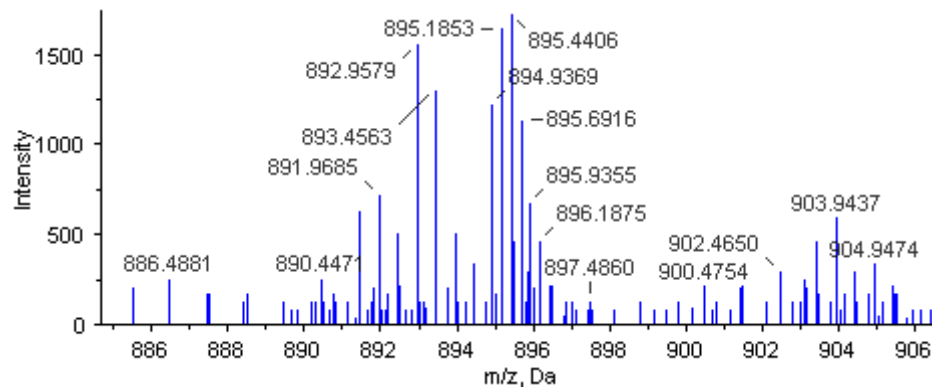

**Sequence Coverage and Matched peptides:** in different color

MNQEMNGDDQENLQEKIDYVFKVVVIGDSAVGKTQLLSRFTKNEFCFDSKSTIGVEFQTRTVTIKGVV  
KAQIWDTAGQERYRAVTSAYYRGALGAMLVYDITKRATFDHVARWVEELRAHADNSIVITLIGNKADLV  
DQRAVPTEDAVEFAEDQGLFFSETALSAGDNVDRAFFRLLLEEIYGVISKKSLECGGHKTNGADSVMLRG  
SKIDVISGSDLEISEMKKLSACSC

# Protein No.: I-267

Protein name and Species:

Peroxiredoxin, putative OS=Ricinus communis

GN=RCOM\_1052060 PE=4 SV=1

Accession: [tr|B9RKM9|B9RKM9\\_RICCO](#)

Unused ProtScore: 8.02

Seq Cov %: 29

ITRAQ Changed Ratio:

117: 115=E3TL: D3TL= 0.39

116: 114=E5TL: D5TL= 0.12

Annotated typical Precursor MS Region:

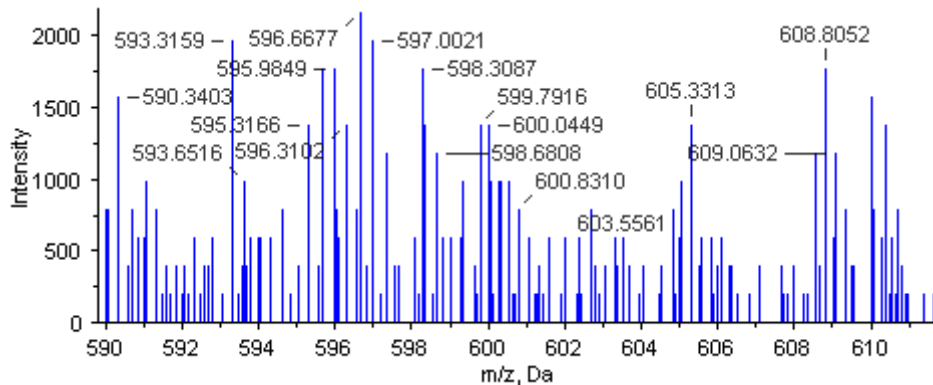

Sequence Coverage and Matched peptides: in different color

MAPIAAGDTLPDGTLAYFDEQDQLQQVSIHSLAAGK**KVVIVGVPGAFTPTCSLK**HVPGFIEKAEELKSK

GVAEILCLSVNDPFVVKAWAKTYPENKHVKFLADGSATYTH**ALGLELDLK**EKGLGTRSR**R**FALLVDDLK

VK**AANLEEGGEFTVSSVDEILKAL**

## Protein No.: I-268

**Protein name and Species:**

**Ubiquilin, putative OS=Ricinus communis GN=RCOM\_0873810**

**PE=4 SV=1**

**Accession: tr|B9S6T7|B9S6T7\_RICCO**

**Unused ProtScore: 8**

**Seq Cov %: 9.3**

**ITRAQ Changed Ratio:**

**117: 115=E3TL: D3TL= 1.53**

**116: 114=E5TL: D5TL= 1.67**

**Annotated typical Precursor MS Region:**

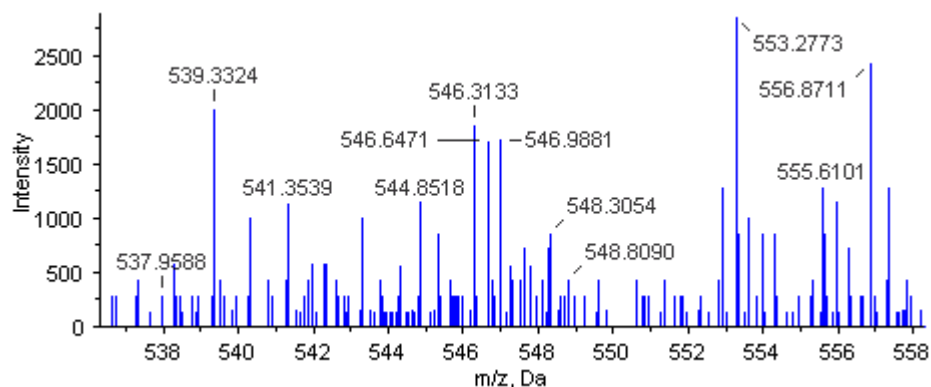

## Sequence Coverage and Matched peptides: in different color

MGGGNGASVDESSNNGDEVNVNIRCSNNGSKFSVGLISLSESVETFKTVLAGKCDVPADQQRLIYKGRILK  
DDQTLQSYGLEADHTVHLVIRGFAPAAAANTAPPSTGGSNPASTNTRAVGSNEGGALGGSIDLGLFPGMR  
LNGLGGSAGLFGAGLPEFEQVQQQLTRNPIMREIMNTPVVQNLMMNPEIMRNLIMNNPQMR**EIIDRNP**  
**ELAHILNDPSTLR**QTLAARNPELMREMMRNTDR**AMSNISSPEGFNMLR**RMYEYTVQEPFLNATTMAGN  
TGGDSANPFAALLGNQAGNQASDATTNPSIASSESTTGSPAPNTNPLPNPWTATGTGGALNNTARSSNT  
GDARPQTPVGLGGLGLPEFDSMFGAMPDSNVMSQMLQNPASQMMQSLLSNPQYMNQMLGSNPQFRSML  
DSNSQFREMMQNPEFLRQLTSPETMQQLLTFQQALLSQFGRQQSNQEPGQTGAGTGTNNMGLDMLMNM  
FGGLGAGSLAVPNRSNVPPEELYATQLSQLQEMGFFDTQENIR**ALIATAGNVHAAVERLLGNSGQ**

## Protein No.: I-269

**Protein name and Species:** 2,3-bisphosphoglycerate-independent  
phosphoglycerate mutase OS=Populus trichocarpa  
GN=POPTRDRAFT\_825441 PE=4 SV=1

**Accession:** [tr|B9IGY9|B9IGY9\\_POPTR](#)

**Unused ProtScore:** 7.99

**Seq Cov %:** 7.5

**ITRAQ Changed Ratio:**

**117: 115=E3TL: D3TL=0.61**

**116: 114=E5TL: D5TL=0.57**

**Annotated typical Precursor MS Region:**

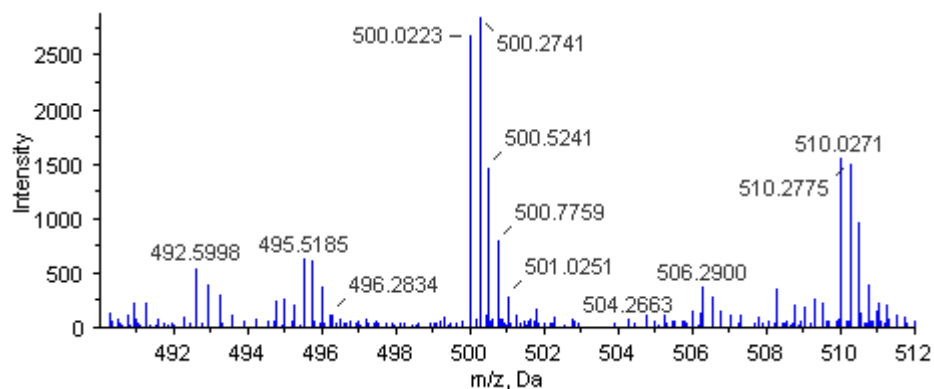



## Sequence Coverage and Matched peptides: in different color

MGSPGQNAWKLADHPKLPKGKTIAMVVLGDWGEAKPDQYNCIHVAHTPTMDSFKTTAPEKWRLIKAHGT  
AVGLPSEDDMGNSEVGHNALGAGRIFAQGAKLVDLALASGKIYDGEQFKYIKECFDNGTLHLIGLLSDG  
GVHSRLDQLQLLLKGAVENGAKRIRVHILTDGRDVLGSSIGFVETLEKDLNLREKGIQAQIASGGGR  
MYVTMDRYENDWDVVKRGWDAQVLGEAPYKFRNAVEAVKKLREEPKANDQYLPPFVIVDESGNPVGP  
DGDVVTFFNFRADRMAMLAKELEYEDFKFDRVRVPKIHYAGMLQYDQELKLP SHYLVSPPEIDRTSGE  
YLVHNGIRTFACSETVKFGHVTFWNGNRSGYFNQEMEEYVEIPSDVGLTFNVQPKMKAIETAEKARDA  
ILSGKFDQVRVNLPNGDMVGHTGDI EATV VACKVADDAVKMIIDAIEQVGGIFVITADHGNAEDMVKRD  
KSGKPLLDKNGNLQILTSHTLQPVPIAIGGPGLAPGARFRNDVPTGGLANVAATVMNLHGFEAPSDYEP  
TLIEVVND

# Protein No.: I-278

## Protein name and Species:

26S proteasome non-atpase regulatory subunit, putative

OS=Ricinus communis GN=RCOM\_0974240 PE=4 SV=1

Accession: [tr|B9SXW5|B9SXW5\\_RICCO](#)

Unused ProtScore: 7.82

Seq Cov %: 20.6

## ITRAQ Changed Ratio:

117: 115=E3TL: D3TL= 0.58

116: 114=E5TL: D5TL= 0.62

## Annotated typical Precursor MS Region:

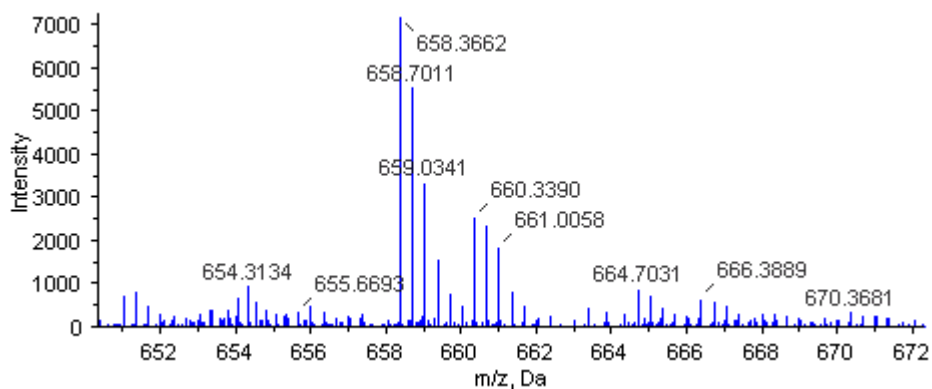

## Sequence Coverage and Matched peptides: in different color

MVLEATMICIDNSEWMRNGDYNPSRFHAQADAVNLI**CGAKTQSNPENTVGVLTMAGK**GVR**VLVTPTSDL**  
**GK**ILACMHGLEIGGEMNLAAGIQVAQLALKHRQNKQQQR**IIVFAGSSIK**HDKKALEMIGKKLKKNNVA  
LDIVDFGEEDEKAEKLEALLAAVNSNDTSHIVHVPPGPSALSDVLISTPVFTGDGEGGSGFAAAAAAA  
AAGGVSGFEFGVDPNLDPELALALR**VSMEEER**AR**QEAAAKKAAEEAAK**QEK**GGEQPSSSQDATMTESAS**  
**VTASEADNKR**HDLTNEENALLQQALAM**SMDDPASSQELR**DTDMSEAAADDPELALALQLSVQDSPKDSG  
NPTDMSKLLADQSFVSSILASLPGVDPNDPSVK**DLASMQSQSEPQEK**KDEDKPKEEK

# Protein No.: I-279

**Protein name and Species:**

**FAS-associated factor 2 OS=Populus trichocarpa**

**GN=POPTRDRAFT\_554543 PE=4 SV=1**

**Accession: tr|B9GXV5|B9GXV5\_POPTR**

**Unused ProtScore: 7.78**

**Seq Cov %: 14.4**

**ITRAQ Changed Ratio:**

**117: 115=E3TL: D3TL=0.47**

**116: 114=E5TL: D5TL=0.67**

**Annotated typical Precursor MS Region:**

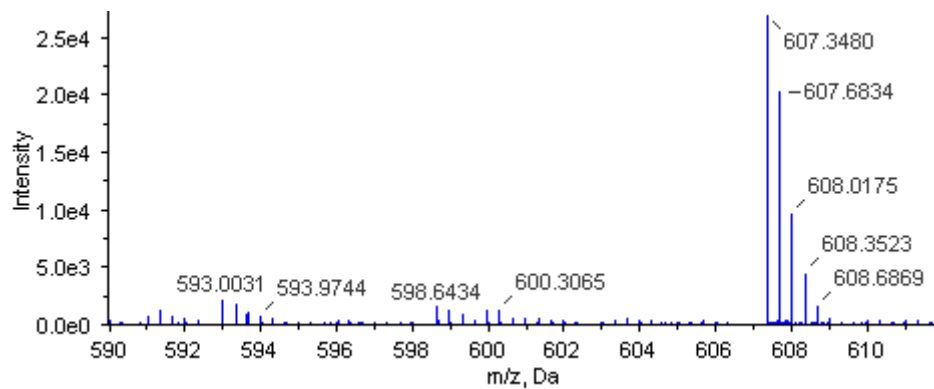

**Sequence Coverage and Matched peptides: in different color**

MVDVADKLAYFQAITGLEDPDLCTQILQAHNWDLELAISSFTSNHNNDPLSYSSSTATATTSTVVEPPI  
SSIHRSDSTAIAPVAPPPPGLGWKIITLPIISIVSGSLRLISGAVGFGFWAAGSIFSYSLSLGFIFSSNSG  
RGGDSSAQLVTVSAASREALEFIAQFERDYGGSGSSSRPNFVGEFMDALTRSRSNSFKLLFVYLHSPDH  
PDTPAFCEGTLTCEVFSFAFVNENFVAVGGSLRGSEGFKMSNSLKASR**FPFCAVVMPATNQRIALLQQVE**  
**GPKSPEEMLMTLQRVLEESAPVLVAAR**LEAEERTTNMR**LREEQDAAYR**AALEADQARERQLREEQERLE  
REAA**EAER**KRKEEEEEAQERATREAAEKEAALARMRQEK**ALSLGAEPEKGPNTQVLVRFPTGER**KERRF  
HSTATIQSLYDYVDSLGLDVENYSLVSNFPRVVYGTDKVLSLSLKEAGLHPQASLFVELN

## Protein No.: I-280

**Protein name and Species:**

**Putative uncharacterized protein OS=Ricinus communis**

**GN=RCOM\_0799000 PE=4 SV=1**

**Accession: tr|B9RRX1|B9RRX1\_RICCO**

**Unused ProtScore: 7.72**

**Seq Cov %: 3.6**

**ITRAQ Changed Ratio:**

**117: 115=E3TL: D3TL= 0.34**

**116: 114=E5TL: D5TL= 0.50**

**Annotated typical Precursor MS Region:**

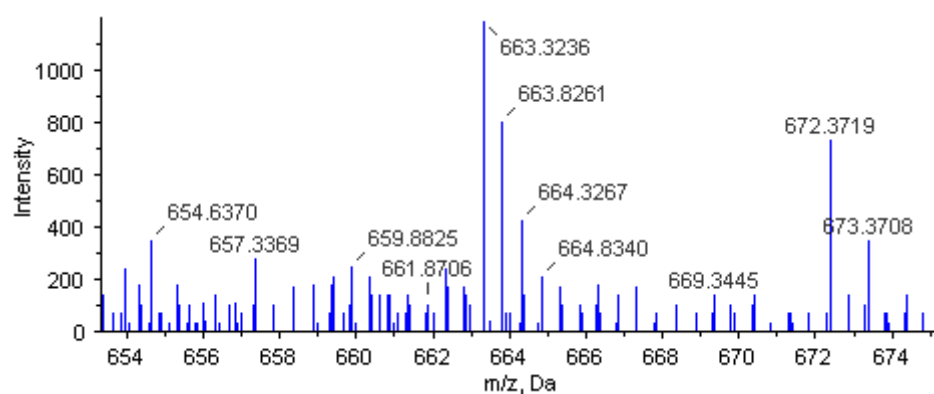

## Sequence Coverage and Matched peptides: in different color

MARFYSSVTLFFNFALIIITTTLISNPNFVISSNNVHTSFSIIDYDSNLFHQDYSPSPPPPPHAPSVS  
CTDDLGGIGSLDTCRIISNVNLTTRDVYIAGKGNFYIHPGVSFNCLSFGCSVTINITGNFTLSINASIV  
TSSFELVAYNASFSNNSVVNTTGLAGNPPPQTSQTPQGIDGAGGGHGGR**GACCLVDDK**KLPEDVWGGDA  
YSWSSLQIPNSYGSRRGGSTSKEVNY**GGGGGK**VKFTI SEYLVVDGGILADGGDGGSK**GGGSGGSIFIK**  
AYKMTGSGR**ISACGGSGFAGGGGGRVSDIFSR**HDDPQIFVHGSSSF**GCPENAGAAGTLYDAVPR**SLIV  
SNHNMSTDTELLLLDFPYQPLWTVYVRNHRATVPLLWSRVQVQGGQISLLCHGVLSFGLAHYASSEFE  
LLAEELLMSDSVIKVYGALRMTVKIFLMWNSKMIVDGGEDTTVTTSWLEASNLIIVLKESSVIQSNANLG  
VHQQLLNLSGPGDSIEAQRLVLSLFYSIHVGPVSVLRGPLQNATSDAVTPRLYCELQDCPIELLHPPE  
DCNVNSSLFRTLQICRVEDITVEGLIKGSVVHFHRARTVSVLSSGR**ISASGMGCTGGVGRGHVLENGIG**  
**SGGGHGK**GGLGCVNGSCIEGMSYGNVELPCELGSGSGDESSAGSTAGGGIIVMGSLDHPPLSSLSVEG  
SVRADGESFQQTVKLGKLTVKNDTTGGPGGGSGGTILMFLHTLDLSESAVLSGGGYGSQNGAGGGGGG  
RIHFHWSDIPTGDVYQPIASVKGSILFGGGTGRDEGCAGENGTVTGKACPKGLFGVFCEECPAGTFKNV  
TGSERSLCHPCPANELPHRAVYVAVRGGIAETPCPYKCI SDRFHMPHCYTALEELIYTFGGPWLFCLLL  
VALLILLALVLSVARMKFVGVDELPGPAPTQHGSQIDHSFPFLESLENEVLETNRAEESQNHVHRMYFMG  
PNTFSEPWHLPHTPPEQIKEIVYESAYN**SFVDE**INAITAYQWWEAMYSILSALLYPLAWSWQQWRRRI  
KLQKLREFV**SEYDHA**CLRSR**ALYEGLK**VAAATPDLMLAYLDFFLGDEKRTDLPPRLHQRFMSII  
FGGDGSYMAPFSIQSDNILTSLMSQTVPPPTTWYRMVAGLNAQLRLVRRGRRLRVTFRSVIKWLETHANPA  
LRIHGIRVDLAWFQATACGYCQYGLLVYAI EEEETGE**SIDGK**QTLQESRENYTRRKS YWGSIDTNNLQ  
MLEEKRDIFCLLSFI IHNTKPVGHQDLVGLVISMLLLGDFSLVLLTLLQLYSISLVDVLLVLLI LPLGI  
LLPFPAGINALFSHGPRRSAGLARIYALWNVMSLINVVVAFVCGYVHYHSQSSSSKKFPFQPWNISMDE  
SEWIFPAGLVLCILQSQLVNVHVNLEIQDRSLYSSDFELFWQS

## Protein No.: I-281

### Protein name and Species:

Glutamate decarboxylase, putative OS=Ricinus communis

GN=RCOM\_0112580 PE=3 SV=1

Accession: [tr|B9SR96|B9SR96\\_RICCO](#)

Unused ProtScore: 7.7

Seq Cov %: 12.3

### ITRAQ Changed Ratio:

117: 115=E3TL: D3TL= 3.25

116: 114=E5TL: D5TL= 0.90

### Annotated typical Precursor MS Region:

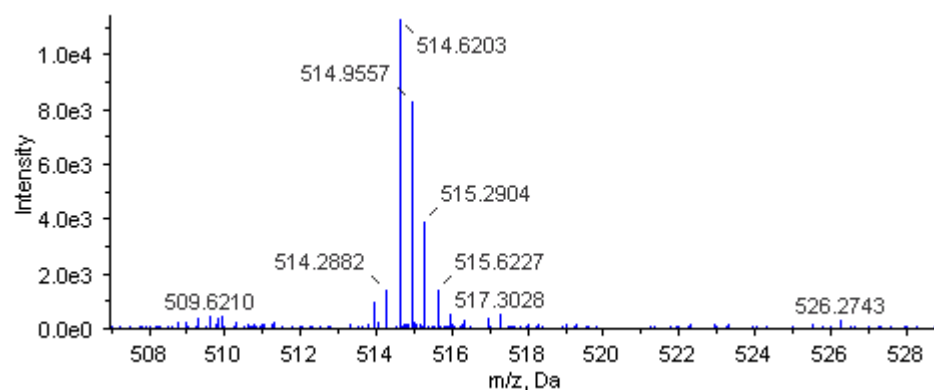

## Sequence Coverage and Matched peptides: in different color

MVLSKTASESDVSVHSTFASRYVRASLPRFKMPESSIPK**EAAAYQIINDELMLDGNPR**LNLASFVTTWME  
PECDKLIMASINK**NYVDMDEYPVTTELQNR**CVNMI AHLFNAPLGDSETAVGVGTVGSSEAIMLAGLAFK  
RKWQNKRKAEGK**PYDK**PNIVTGANVQVCWEKFARYFEVELKEVKLRDGYVMDPVKAVEMVDENTICVA  
AILGSTLNGEFEDVKLLNDLLTEKNKQTGWDTPIHVDAASGGFIAPFLYPELEWDFRLPLVKSINVS GH  
KYGLVYAGIGWVIWRNKDDL PDELIFHINYLGADQPTFTLNFSK**GSSQVIAQYYQLIRLGYEGYR**NIME  
NCRDNMLVLKDGLEKTGRFT**IVSKDNGVPLVAFSLK**DNSSHNEFEISELLRRFGWIVPAYTMPDPAQHV  
TVLRVVIREDFSRFTAER**LVLDI EK**VLHELDTLPSRLREKIAIVEEKEKNGTKAAKKS VIETQREITTI  
WKKFVLEKKKMNGVC



## Protein No.: I-284

**Protein name and Species:**

hydroxycinnamoyltransferase ; Quinate

O-hydroxycinnamoyltransferase/shikimate

O-hydroxycinnamoyltransferase OS=Populus trichocarpa PE=2

SV=1

**Accession:** tr|B2Z6Q5|B2Z6Q5\_POPTR

**Unused ProtScore:** 7.66

**Seq Cov %:** 15

**ITRAQ Changed Ratio:**

**117: 115=E3TL: D3TL= 0.38**

**116: 114=E5TL: D5TL= 1.00**

**Annotated typical Precursor MS Region:**

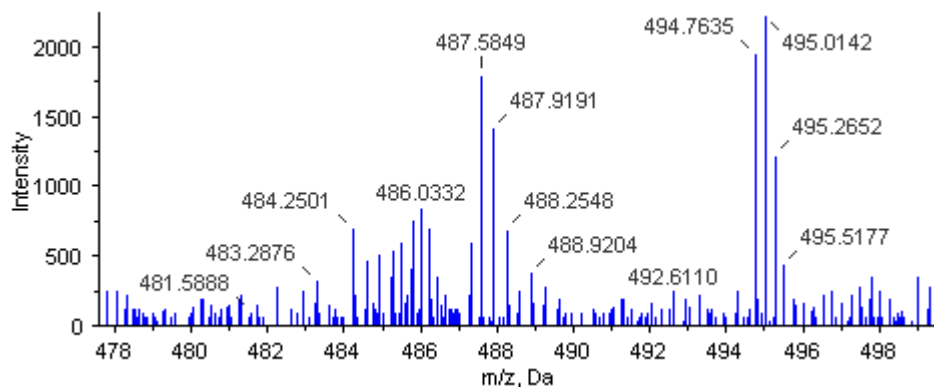

## Sequence Coverage and Matched peptides: in different color

MI **INVK**ESTMVQPAEETPRRGLWNSNVDLVVPR**FHTPSVYFYR**PTGASNF**FDAK**VLKEALSK**ALVPFY**  
**MAGR**LRRDDDGRIEIDCNAEGVLFVEAGTASVVADFGDFAPTLELKQLIPTVDYSGGISTYPLLVLQVT  
YFKCGVSLGVGMQHHAADGFSGLHFVNTWSDMAR**GLDLTIPPFIDR**TLLRAR**DPPQAFHHVEYQPP**  
**AMK**TVLETSKPESTAVSIFKLTRDQLNLTAKAKAKEGGNNIGYSSYEMLAGHVWR**SACK**ARGLPDDQETK  
LYIATDGRSRLRPTLPPGYFGNVIFTATPIAVAGEIQSKPTW**YAAGK**IHDSLVR**MDNDYLR**SALDFLEL  
**QPDLSALVR**GAHTFR**CPNLGITSWVR**LPIHDADFGWGRPIFMGPGGIAYEGLSFIIPSSSTNDGSLVAI  
SLQ**AEHMK**LFEKFIYDIKE

## Protein No.: I-289

**Protein name and Species:**

**Eukaryotic translation initiation factor 2c, putative OS=Ricinus  
communis GN=RCOM\_0476750 PE=4 SV=1**

**Accession: tr|B9SCN8|B9SCN8\_RICCO**

**Unused ProtScore: 7.53**

**Seq Cov %: 7.3**

**ITRAQ Changed Ratio:**

**117: 115=E3TL: D3TL= 1.50**

**116: 114=E5TL: D5TL= 1.39**

**Annotated typical Precursor MS Region:**

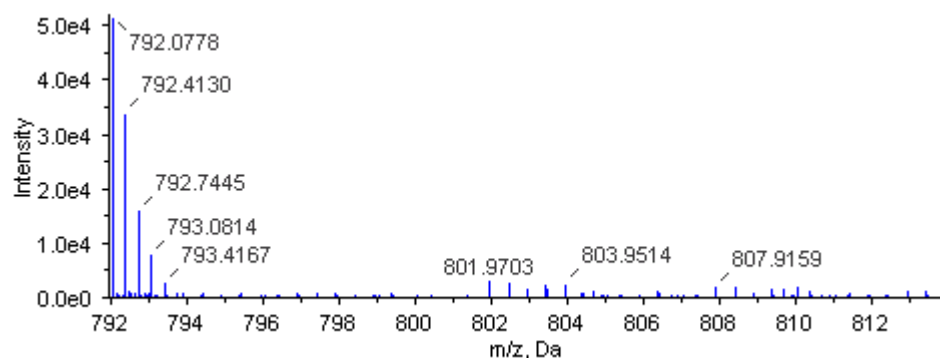

## Sequence Coverage and Matched peptides: in different color

M**SHRGGGRRQESQRDR**QSSATSPSFN**RGGGGGRGGRGR**GGAGSFYAQPAPPPAGSDFPSSLRPPPTSSR  
AAAAPQAAPPSSSSRAPPAPAPAPAPPPAAAASTSTQIEKLTHGVEQLTTTAGAPTPSSSKEIRFPNRP  
GYGSIGMKCVVKANHFVLDVADRDLRQYDVSITPELTSKKINRDVISQLIRMFRQSHLGNRRAAYDGRK  
**SLYTAGPLPFESKEFVVK**LVESNKNAGSSVSSKKEREFKVAIKFASKPDIHHLKQFLIGRQMDCPQETI  
QVLDIVLRETPSEKYTPVGRSFFSPDLGQK**GELGDGIEYWR**GYYSLSRPTQMGLSLNIDVSARSFYEPI  
IVTD**FVSK**YLKLRDMSRPLSDQDRIKVKKALKSVKVQILHREYAKSYKVTGISNKPLNQ**IFFK**LDDKST  
DISVVQYFREKYN**IGLK**YTSLPALQAGSDAKPIYLPMEELCKIVDG**QRYSK**KLNERQVTALLRATCQRPH  
EREESIKQMVKRNSYNQDVLVRDEFGIQVK**EELTFVDAR**VLPAPMLNYHETGRESRVDPRCGQWNMINK  
KMVNGGSVNFWTCVNFSL**LNINR**DLPAEFRC**QLIQMCVSK**GMAFNPNPIIPISSA**HPGQIGKTLNDIKRQ**  
**CEAK**LVKQLQLLIIILPDISGSYGIKRV**CETELGIVSQCCQPR**QAAKLSK**QYFENVALKINVK**VGGRN  
TVLNDAVQRRIPLVTDCTIIFGADVTHPPPGEDESSPSIAAVVASMDW**PEVTK**YRGIVSAQAHR**EETIQ**  
**DLYK**SFQDPQGILKHSGMIRELFVAFRRETGMKPKR**IIFYR**DGVSEGGQFSQVLLYEMDAIRKACASLEE  
GYLPPVTFVVVQKRHHTR**LFPVDR**GQTDR**SGNILPGTVIDTK**ICHQREFDFYLNHAGIQGTSRPTHYH  
VLYDENHFTADNLQVLTNNLCYTFARCTR**SVSIVPPAYYAH****LAAFR**ARYYIEGEMSDGG**STSGK**STTGR  
SKEVQPL**PVIK**DNVKDVMFYC

# Protein No.: I-290

Protein name and Species:

Fructose-bisphosphate aldolase OS=Mesembryanthemum  
crystallinum PE=2 SV=1

Accession: [tr|O04975|O04975\\_MESCR](#)

Unused ProtScore: 7.51

Seq Cov %: 21.9

ITRAQ Changed Ratio:

117: 115=E3TL: D3TL= 0.66

116: 114=E5TL: D5TL= 1.37

Annotated typical Precursor MS Region:

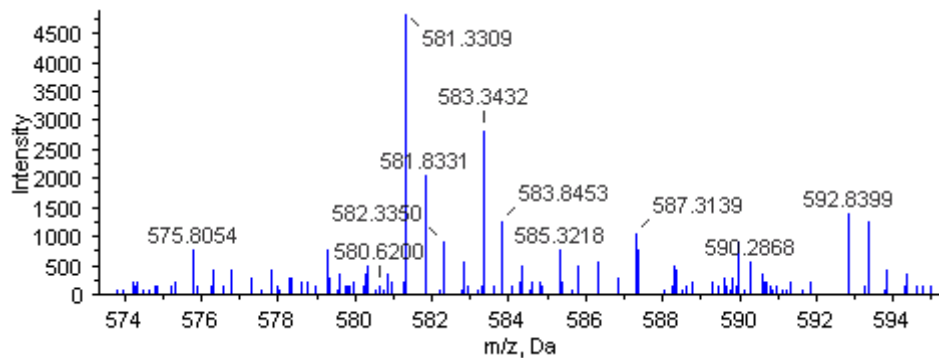

Sequence Coverage and Matched peptides: in different color

MTAYRGGK**YADELIANAAYIGTPGK**GILAADE**STGTIGKR**FAGINVENVESNRRALRELLFTTPGAVQYL  
SGVILFEETLYQKTAAGKPFVEVLK**EGNVLP**GIKVDKGVVELAGTNGETTTQGLDGLGARCAQYYAAGA  
RFAKWRAVL**KIGP**TEPSPLAILLENANGLARYAII**CQ**ENGLVPIVEPEILVDGPHDIDRCAEVTER**VLAA**  
**CYKALNDHHVLL**EGTLLKPNM**VTPGSESKKVAPEVIAEYTVR**ALQRTVPPAVPAVMF**LSGGQSEEEATV**  
**NLNAMNKLQ**GKKPWTL**SFSYGRALQSSTLK**AWSGKEENVEKAQAVFL**ARAK**GNSEATLGKYQGGAGGAD  
**ASESLHVK**DYKY

## Protein No.: I-293

**Protein name and Species:**

**Nuclear protein localization, putative OS=Ricinus communis**

**GN=RCOM\_0557110 PE=4 SV=1**

**Accession: tr|B9S3Y6|B9S3Y6\_RICCO**

**Unused ProtScore: 7.44**

**Seq Cov %: 18.2**

**ITRAQ Changed Ratio:**

**117: 115=E3TL: D3TL= 0.11**

**116: 114=E5TL: D5TL= 0.68**

**Annotated typical Precursor MS Region:**

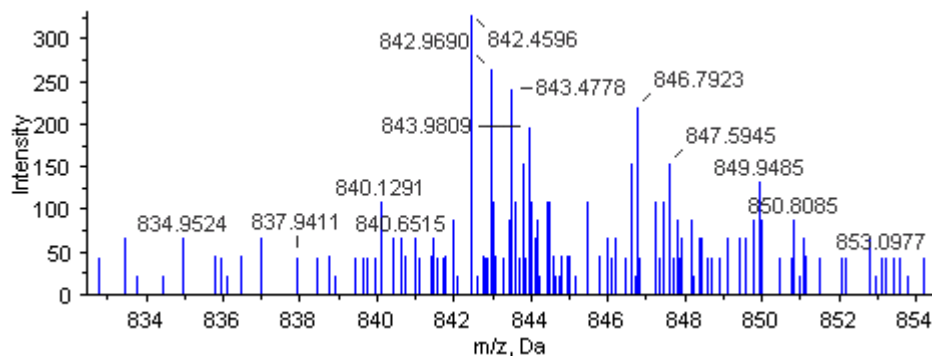

## Sequence Coverage and Matched peptides: in different color

MMIRIRSRDGLERVSVENPNITVSQKTLIQNQLNIPIQNQTLSTNQNL~~LLAK~~SPSDVLKFTDMSNPNT  
PLSSLNITHGSILFLTYDGER~~TIAGPAVNPAGSFGRKMTMDDLIAKQMRITRQENPHCESVSFDR~~DCAN  
AFQHIPMMVKLRFIIIIYEPQOGTEENMLLRDPEEEKLVDAIAVGLGMRRVGFIFTQITQDKKDYTL  
SNR~~EVLQAAELHAESLK~~EWVTAIVKLEVNEDGGADVHFEAFQMSDMCIRLFKEDWFEKEIAEDSDPKL  
SKMKK~~DVVVGK~~DVR~~EVDNDFFLVVVKILDHLGPLSSSFPIENR~~INQVTKRALKSHLDRLKNLSFVKRI  
SDFHLLLFLGRFLDVSDVPALAEVLTQTAVPEGYQLIIESVANS

# Protein No.: I-297

**Protein name and Species:** Nucleic acid binding protein, putative

**OS=Ricinus communis GN=RCOM\_1326600 PE=4 SV=1**

**Accession:** [tr|B9S228|B9S228\\_RICCO](#)

**Unused ProtScore:** 7.32

**Seq Cov %:** 21.9

**ITRAQ Changed Ratio:**

**117: 115=E3TL: D3TL= 0.50**

**116: 114=E5TL: D5TL= 0.64**

**Annotated typical Precursor MS Region:**

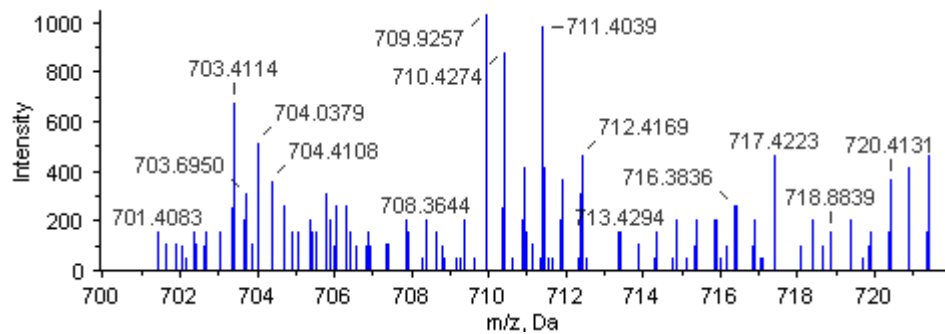

**Sequence Coverage and Matched peptides:** in different color

MAITTVK**VSNVSLGATEQDIK**EFFFSFSGDIDYVELLGDNER**SQIAYVTFK**DQQGAETA VLLSGATIVDQ

SVTIELAPDYKLPAAASVPTTATESSTASGAESAFQ**KAEDIVSSMLAKGFILGK**DAVNKAKAFDEKHQF

TSTATSKVASLDEKIGLTEK**ISAGTTLVNDK**VREVDEKFRVSETTK**SAFAAAEQTVSNAGSAIMK**NR**YV**

**LTGASWVTGAFNR**VAKAAGEVVGQKTKEKVLAEQEQNQAEGYTQIHGTDSPNMSEQMSKSSH



# Protein No.: I-299

**Protein name and Species:**

**Proteasome subunit beta type OS=Populus trichocarpa**

**GN=POPTRDRAFT\_814139 PE=3 SV=1**

**Accession: tr|B9HUT6|B9HUT6\_POPTR**

**Unused ProtScore: 7.28**

**Seq Cov %: 28.7**

**ITRAQ Changed Ratio:**

**117: 115=E3TL: D3TL= 1.57**

**116: 114=E5TL: D5TL= 0.84**

**Annotated typical Precursor MS Region:**

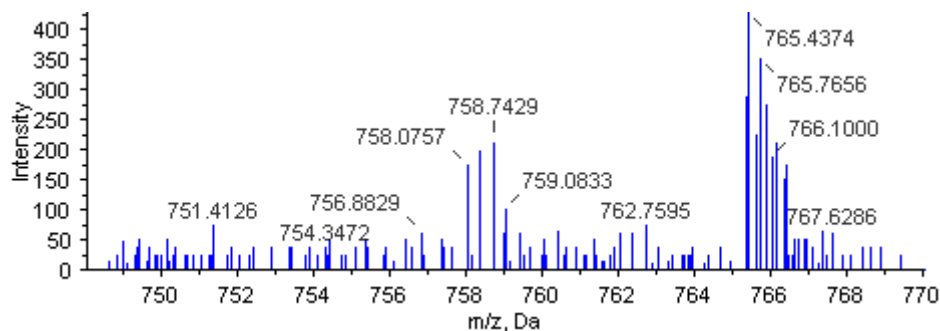

**Sequence Coverage and Matched peptides: in different color**

MECVFGLVGDGFVIVASDTSAVNSILVHKTNEDK**IMKLD**SHK**LVAASGESGDRVQFTEYIQKNVALYQF**

**RNGIPLTTAAANFTR**GELATALRKNPYMVNILLAGYDK**ETGPSLYYIDYIATLHK**VDRGAFGYGSYFC

LSMMDRHYHSGMSVEEAVELVDKCITEIQSR**LVVAPPNFVIK**IVDR**DGAREYAWRESVK**DTPTAQPEAL

GV

## Protein No.: I-306

**Protein name and Species:**

**Ganglioside induced differentiation associated protein, putative**

**OS=Populus trichocarpa GN=POPTRDRAFT\_765804 PE=4**

**SV=1**

**Accession: tr|B9HIC5|B9HIC5\_POPTR**

**Unused ProtScore: 7.1**

**Seq Cov %: 12.1**

**ITRAQ Changed Ratio:**

**117: 115=E3TL: D3TL= 2.78**

**116: 114=E5TL: D5TL= 1.59**

**Annotated typical Precursor MS Region:**

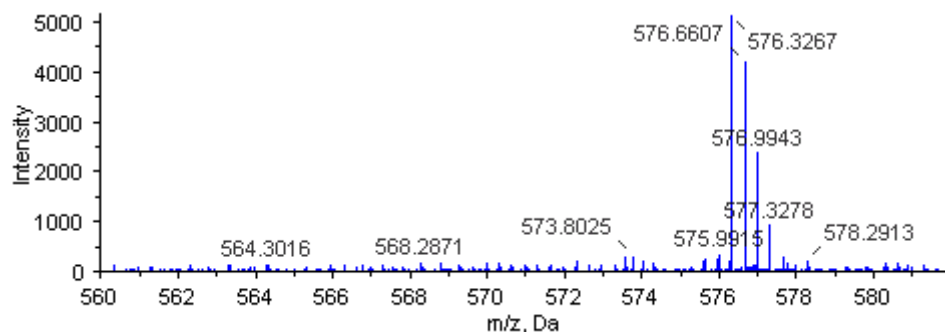

## Sequence Coverage and Matched peptides: in different color

MYQRVPAAVTTR**GGSP****TDNGDSVV****TLDQVPR**WSDAESRSSFGYDNEDPSFTNPFFPDPLTSPSEGESS  
CGMVSR**FPVDHEINSK**IYLWRGNPWNLEVDVAVNSTNELLDEAHSSPGLHAAAGPGLAEECTTLGGCRT  
GMAKVTNAYDLPARR**VIHTVGP**KYAMKYHTAAENALSHCYRSCELELLIENGLQSIAMGCIYTESKNYPR  
**EPAAHVAIR**TVRRFLEKQKNKITAVVFCTTTSTDTEIYKRLPLLYFPREKHEEE**VAIAKLPADVGDENG**  
**ETIIDER**KIRIKPLPKKNIPRPSQPLADLPVIDVGLVRRNSSLDSYLDPAFMSVIKDPDQRRKEQWEK  
TAQAQSGWNCAKIFGFGDLGGPTLSAAEEYSLHSRYLAK**ANSLNLS**EIAEMKIVYRGGVDSEGRPVMV  
VGAHFLRLCLDLERFVLHVVKEFEPLIQKPYTIVYFHSAASLQVQPDLGWIRRLQQLTRKHQRNLHAI  
YVLHPNFHLKATIFALQV**FVDK**VTWKKVVYVDRLVQLFRYVPREQLTIPDFVFQHDLEVNGGGLIVDP  
RTKYVYHRP

# Protein No.: I-310

**Protein name and Species:**

**40S ribosomal protein S2, putative OS=Ricinus communis**

**GN=RCOM\_1577790 PE=3 SV=1**

**Accession: tr|B9RIC4|B9RIC4\_RICCO**

**Unused ProtScore: 7.05**

**Seq Cov %: 18.2**

**ITRAQ Changed Ratio:**

**117: 115=E3TL: D3TL= 1.51**

**116: 114=E5TL: D5TL= 1.12**

**Annotated typical Precursor MS Region:**

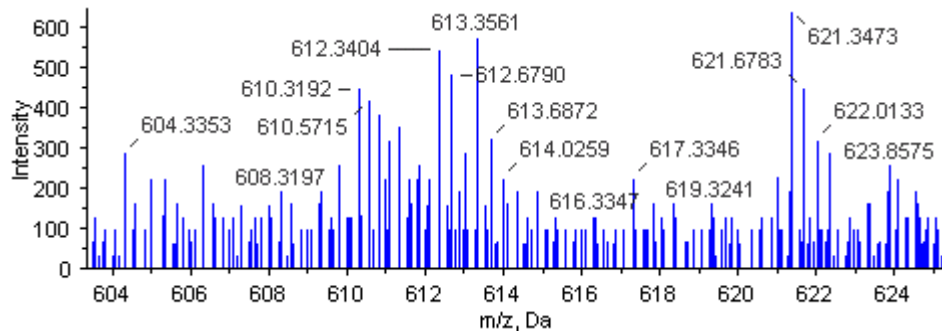

**Sequence Coverage and Matched peptides: in different color**

**MSERP**GGGERGAFRR**G**FGG**A**GRGDRGGRGRRRPRREEEKWPVTKLGRLVKEGKIR**SLEQIYLHSLPI**  
**KEHQIIDTLVGP**SLKDEVMKITPVQKQTRAGQRTRFKAFVVVGDGNHGVGLGVKCSKEVATAIRGAI**IL**  
**AKLSVIPVR**RGYWGNKIGKPHTVPCKVTGKCGSVTVRMVPAPR**GAGIVAAR**VPKK**VLQFAGIEDVFTSS**  
**RGSTKTLGNFVKATFDCLLK**TYGFLTPDFWRETHFTKSPFQYTDLLGKPTKVLIEDVERVDA

# Protein No.: I-314

**Protein name and Species:**

**DNA damage-inducible protein OS=Populus trichocarpa**

**GN=POPTRDRAFT\_744891 PE=2 SV=1**

**Accession: tr|A9PEP6|A9PEP6\_POPTR**

**Unused ProtScore: 6.98**

**Seq Cov %: 13.9**

**ITRAQ Changed Ratio:**

**117: 115=E3TL: D3TL= 0.47**

**116: 114=E5TL: D5TL= 0.52**

**Annotated typical Precursor MS Region:**

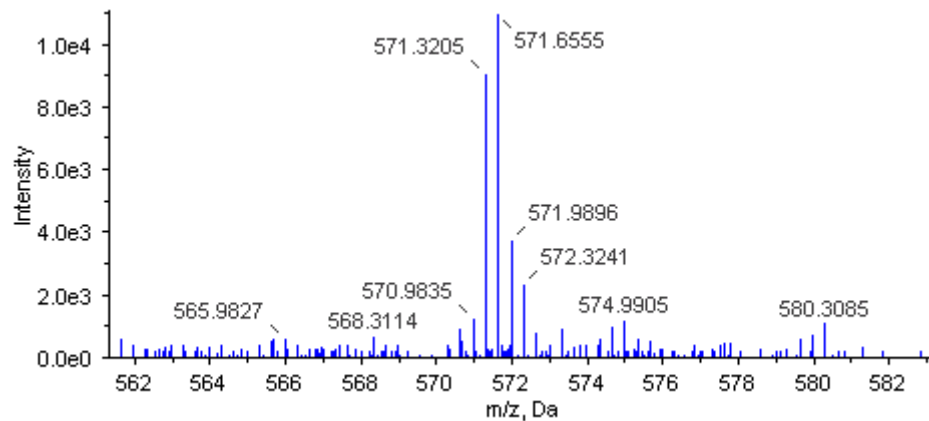

**Sequence Coverage and Matched peptides: in different color**

MRITVMTADEQIIISLEVDPHESVENVK**ALLEVETQVPLQQQQLLYNGR**EMRNNEK**LSALGVK**DEDLVMM  
VSNAALSA<sup>S</sup>PNLGLNPDGSAMNPGAFQQQLRND<sup>S</sup>NTMAQLFQADPELAQVILGNDLNK**LQDLLR**QRH  
RQRSELHR**QQEEEFALLEADPF**DVEAQK**IEAAIR**QK**GIDENWAAALEYNPEAFAR**VIMLYVDMEVNGV  
PLK**AFVDSGAQSTIISK**SCAERCGLLRLLDQRYKGI**AHGVGQSEILGR**I**HVAPIK**IGNIFYPCSFMVLD  
SPNMEFLFGLDMLRKHQCIIDLKENVLR**VGGGEVSV**PFLQEKDIPPRFLDEERY**SKEASS**GNPVTSGK  
AEKKNPAMGQSSGVARSSVTQGPDFEAK**VAKLVELGFGR**EAVIQALKLFDGNEEQAAGFLFGG

# Protein No.: I-315

**Protein name and Species:**

**Putative uncharacterized protein OS=Vitis vinifera**

**GN=VIT\_18s0001g08370 PE=3 SV=1**

**Accession: [tr|F6H158|F6H158\\_VITVI](#)**

**Unused ProtScore: 6.98**

**Seq Cov %: 5**

**ITRAQ Changed Ratio:**

**117: 115=E3TL: D3TL= 0.44**

**116: 114=E5TL: D5TL= 0.60**

**Annotated typical Precursor MS Region:**

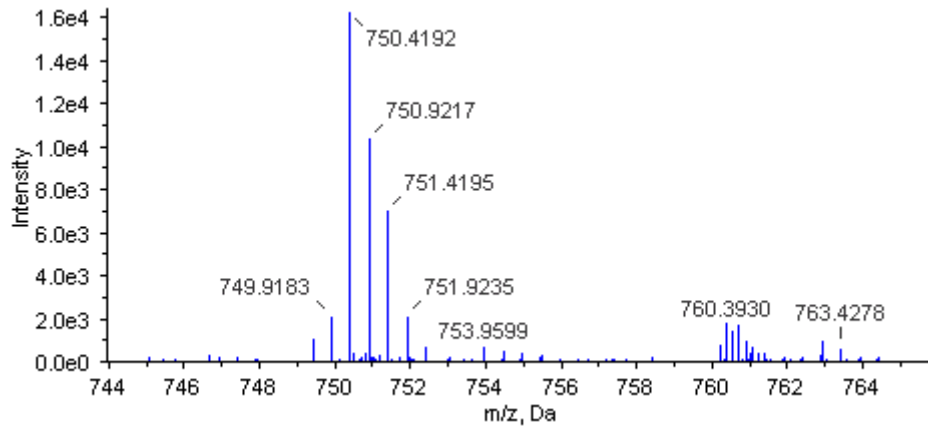

## Sequence Coverage and Matched peptides: in different color

MRRIWPC**CFTR**RVSNTHQKAEDIQR**SIGTMENPK**EGNADHGVSEKQNESTIKSRDSLSSNIILNHDFSR  
GLHSWNLNCCNGSVVSAESGFLEGISVKSGGNYAVITNRKECWQGLEQDITSRVSLGSTYSVSACVGV  
GSLQGSAAVQATLKLEYQGSATSYLFIGRTSVSREQWKK**LEGTFSLS**TMPDRVVFYLEGPPGL**DLLIE**  
SVVIFCSPTEEESSSTRCAAAGDENIILNPIFEDGVNWSGRGCKILLHDSMGGGKIVPQSGKFFASA  
TERTQSWNGIQQEITGRVQR**KLAYEVA**AVRIFGNNVTSADVRLWVQTPNLREQYIGVANSQATDKD  
WIQLQGKFLNAPSRRVVIYLEGPPPSTDILVNSLVVKAEEKIPPSPPPVEDPAFGINTIQNSNLNDG  
SNGWFPLGSCTLSVATGSPRILPPMARDSLGAHNPLSGHYILVTNRTQTWMGPAQMITDRVKLYLTYQV  
SAWVRIGPGATAPQNVNVALGVDSQWVNGGQANVSDDRWEIGGSFRIEKQPLKVMVYVQGPASGVDLM  
**VAGLQIFP**VDRHARFRHLKKETDKIRKRDVILNFSGSGTGT**SIGTFVK**VRQTQNSFGFGSCVSRNIDN  
EDFVD**FFVK****NFNWAVFGNELK**WYWTESQQGNFNRYRDADELDDLCKSHNMETRGHCIFWEVEGTVQPWVK  
SLNKNDLMTAVQNRLTGLLTRYKGGFRHYDVNNEMLHGSFYQDRLGKDIRANMFKTANQLDSSAALFVN  
DYHVEDGCDTRSSPEKYIEQVIDLQKQGAPVGGIGIQGHIDSPVGPVCSALDKLGLVGLPIWFTELD  
SSINECIRADDLEVMLREAFAPAVDGIWGFWELFMSRNNALVNAEGEINETGWRYLALRKEWLSH  
AHGHIDEQGEFMFRGFHGSYVVEIGTGSKKISKTFVVDNNGESPLVVSIGL

## Protein No.: I-321

**Protein name and Species:**

**Ubiquitin-protein ligase, putative OS=Ricinus communis**

**GN=RCOM\_1154930 PE=4 SV=1**

**Accession: tr|B9SG36|B9SG36\_RICCO**

**Unused ProtScore: 6.86**

**Seq Cov %: 6.5**

**ITRAQ Changed Ratio:**

**117: 115=E3TL: D3TL= 1.80**

**116: 114=E5TL: D5TL= 1.08**

**Annotated typical Precursor MS Region:**

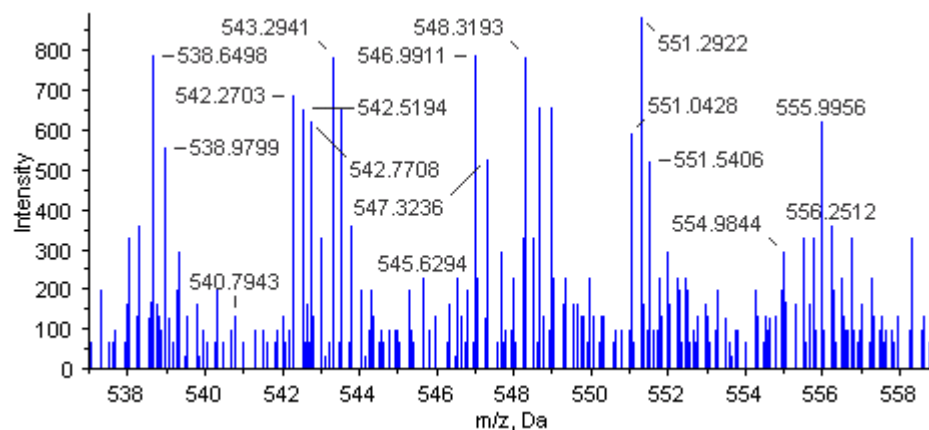



## Sequence Coverage and Matched peptides: in different color

MSVMGYNLAGDVTSANLFHK**ESSVMEISLLK**ALLSNISSFLHLSSIDNICSDLVQKCYQK**AEETL**LLK  
PILDAIVDSEIASDEVLT**AFDELGQSVDEL**RELFFENWQPLSSKVVFFVLQIESLISKIRTLGLD**IFQLL**  
**KSSHEHLPDELSTSSLEEILIEAVALEKLEKNAEQAEKPREAELFDQMISLSQTCSHVPIPADFCCPLS**  
LELMTDPVIVGSGQTYER**AFIK**NWIELGLTVCPKTRQTLAHTNLIIPNYTVK**ALIANWCE**SNNV**KLPDPV**  
**KSVS**FNQPSALLIHAESGTPRGSHGFYSRGNQPMSPSTRSTDSFDRNWISSVHRESTSPCHPRSTSD  
SSLSGIVGNEQGLDMARISLASSEERSVNLEGRNRDSGV**RHSVS**PSRNEVSNVAVRVGEP**IAQSHSRNAS**  
ASSINASFSGAQVDTNDSSEVLNHLTSYSSDNSGEVKAETQASTALNSPRPHREPEFAPRFIETR**SRS**  
QTIWRRPSDRLIPRIVSSP**AIETRADLSGVETQVR**NLVEDLKSDSIDVQRAATAEL**LLAK**HNMDNRIV  
IANCGAINILVNLRSADAKIQENAVTALLNLSINDNNKTAIANADAIGPLIHVLETGSPEAKENSAAT  
LFSLSVIEDNKVRIGRSGAVGPLVDLLGN**GTPRGK**KDAATALFNLSIFHENKARIV**QAGAVKHLVELMD**  
**PAAGMVDKAVAVLANLATIPEGRTAIGQEGGIPVLVEVVELGSAR**GKENAAAAALLQLCTNSNRF**CNTVL**  
QEGAVPPLVALSQSGTPRAKEKAQALLSFFRNQRHGNARG

# Protein No.: I-322

**Protein name and Species:**

**alanine      aminotransferase      OS=Populus      trichocarpa**

**GN=POPTRDRAFT\_1073568 PE=4 SV=1**

**Accession: tr|B9GXZ6|B9GXZ6\_POPTR**

**Unused ProtScore:      6.86**

**Seq Cov %: 20.2**

**ITRAQ Changed Ratio:**

**117: 115=E3TL: D3TL= 0.44**

**116: 114=E5TL: D5TL= 2.25**

**Annotated typical Precursor MS Region:**

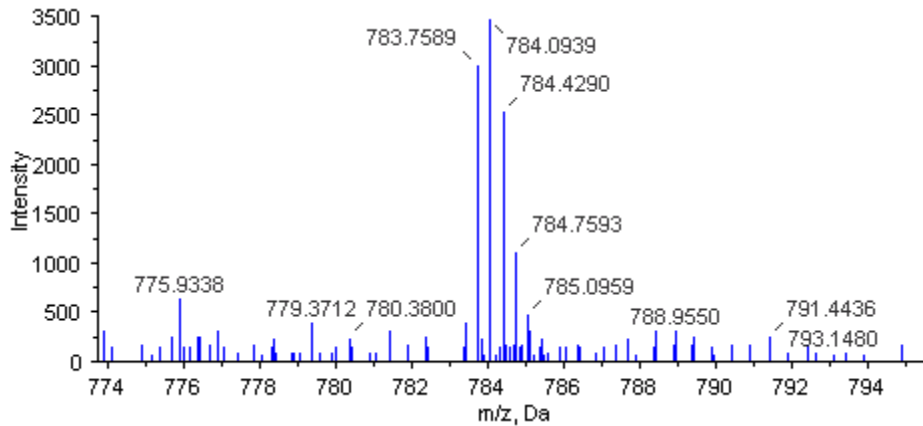

## Sequence Coverage and Matched peptides: in different color

MPPVSLDNINPKVLKCEYAVRGEIVTLAQALQEELKSKPGSHPPFDEILYCNIGNPQSLGQQPITFFREV  
LALCDHPSILDR**SETQGLFSADAIER**AWQILDQIPGR**ATGAYSHSQGIK**GLRDTIAAGIEARDGFPADP  
NDIFLTDGASPAVHMMQQLIRSEKDGILCPIPQYPLYSASIALHGGALVPYYLDEATGWGLEVSELKK  
QLADAKSKGITPR**ALVVINPGNPTGQVLAEDNQR**GIVEFCK**QEGLVLLADEVYQENVYVPEK**KFDSFKK  
VARSMGYGEKDISLVSFQSVSKGYYG**ECKRGGYMEVTGFGEIRE**EQIYKVASVNLCSNISGQILASLV  
MSPPK**VGDESYESYSAEKDGI****ILSS****LAR**RAK**TLEDAFNNLEAVTCNK**AEGAMYLFPICLPEKAIAKAA**EA**  
**AK**TAPDNFYCRLLNATGIVFVPGSGFGQLPGTWHFR**CTILPQEDKIPAVVSR****LTEFHK**SFMDEFDRD

# Protein No.: I-324

Protein name and Species:

ATP-citrate synthase alpha chain OS=Vitis vinifera

GN=VITISV\_017316 PE=4 SV=1

Accession: tr|A5AQP2|A5AQP2\_VITVI

Unused ProtScore: 6.85

Seq Cov %: 19.6

ITRAQ Changed Ratio:

117: 115=E3TL: D3TL= 0.51

116: 114=E5TL: D5TL= 0.71

Annotated typical Precursor MS Region:

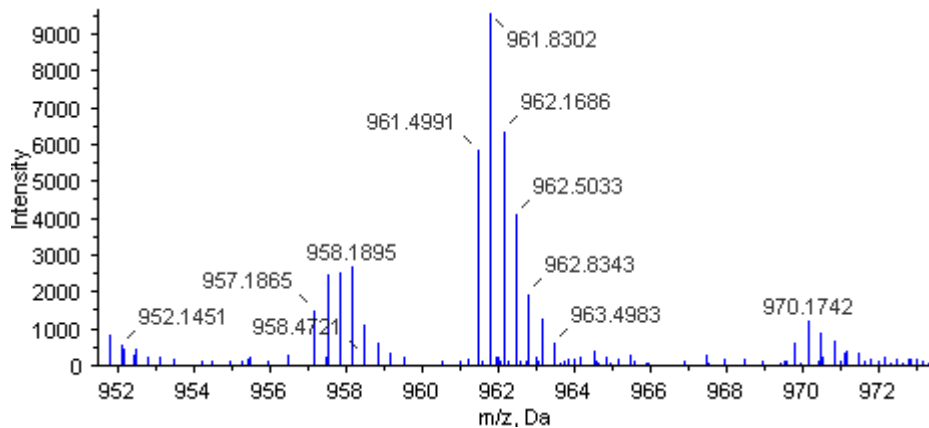

Sequence Coverage and Matched peptides: in different color

MARKKIREYDSKRLKLEHLKRLVIGIDLQICSAQVTEATDFAELTNKEPWLSS**TRLVVKPDMLFGK**RGKS  
GLVALNLDLAQV**AEFVK**ARLGVVEVMGGCKAPITTFIVEPFVPHDQEYYLSIVSDRLGCTISFSECGGI  
EIEENWDKVKVTINLPTEKPMTPETCAPLIATLPLEVRGKIGDFIKGVFAVFQDLDFSFLEMNPFLLVNG  
**EPYPLDMR****GELDDTA****AFK****N**FKT**WGNIEFPLPFGR**VLSPTEGYIHLLDEKTSASLK**FTV****LNPK**GRIWMTV  
AGGGASVIYADTVGDLGY**ASELGN****YAEYS****GAPNEEEVLQYAR****VVLD****CATADPDGR**KRALLIG**GGIAN****FT**  
**DVAATFNGIIR**ALKEKESKLKASRMHIYVR**RG****GP****NYQTGL**ARMR**ALGEELGIP****LEVY****GPEATMTGICK**Q  
AIDCIMSTA

## Protein No.: I-327

**Protein name and Species:**

**Heat shock protein 70 OS=Hevea brasiliensis GN=HSP70 PE=2**

**SV=1**

**Accession: tr|B2MW33|B2MW33\_HEVBR**

**Unused ProtScore: 6.81**

**Seq Cov %: 33.3**

**ITRAQ Changed Ratio:**

**117: 115=E3TL: D3TL=0.65**

**116: 114=E5TL: D5TL=0.70**

**Annotated typical Precursor MS Region:**

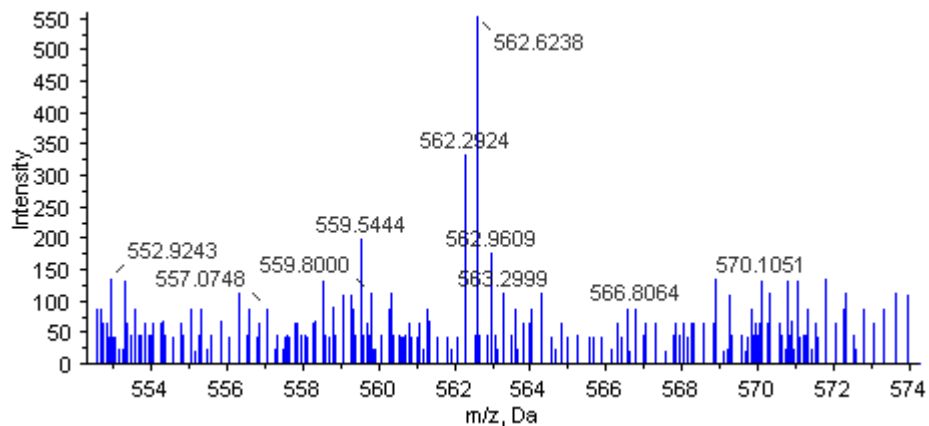

## Sequence Coverage and Matched peptides: in different color

MAPKTEGKAIGIDLGTTYSCVGVWQNDR**VEIIANDQGNR**TTPSYVAFTDTER**LIGDAAK**NQVAMNPQNT  
VFDAKRLIGRR**FSDPSVQSDMK**HWPFFK**VISGPGDKPMIVVQYK**GEEK**QFAPEEISSMVLTK**MKEIAEAY  
LGQTVKNAVITVPAYFNDSQRQATK**DAGAIAGVNVMRI**INEPTAAAIAYGLD**KK**GSSTGEKNVLIIFDLG  
GGTFDVSLLTIEEGIFEVK**ATAGDTHLGGEDFDNRLVNHFVAEFK**GKHKKDIST**NARALRRLRTARERA**  
KRTLSSSTSQTIEIDSLYEGIDFYATITR**ARFEELNMDLFRK****CMEPVEK**CLRDSKIDK**SQVHDVVLVGG**  
**STR**IPKVQQL**LQDIFNGK**ELCK**SINPDEAVAYGAAVQAAILSGEGDEK**VQDLLLLLDVTP**LS**GIETAGG  
VMTVL**IPRNTTIP**TK**EQIFSTYSDNQPGVLIQVYEGERAR**TK**DNNLLGKFELTGIPPAPR**GVPQINVC  
FDIDANGIVNVSAED**KTAGVK**NK**ITITNDKGR**L**SKEEIERMVQEA**EKYKAEDDEEVKKKVEAK**NS**LENYA  
**YNMR**NTVKDDKFAGKLAPADKGI**EKAIDETIEWLDRNQLAEVEEFEDK****LKELEGLCNPIIAK**MYQGGAGG  
GGDVPVGAEMPNSNYGKTSSGGSGAGPKIEEVD

# Protein No.: I-328

**Protein name and Species:**

**Esterase D, putative OS=Ricinus communis**

**GN=RCOM\_0893450 PE=4 SV=1**

**Accession: tr|B9SCD6|B9SCD6\_RICCO**

**Unused ProtScore: 6.77**

**Seq Cov %: 17.7**

**ITRAQ Changed Ratio:**

**117: 115=E3TL: D3TL= 0.32**

**116: 114=E5TL: D5TL= 2.32**

**Annotated typical Precursor MS Region:**

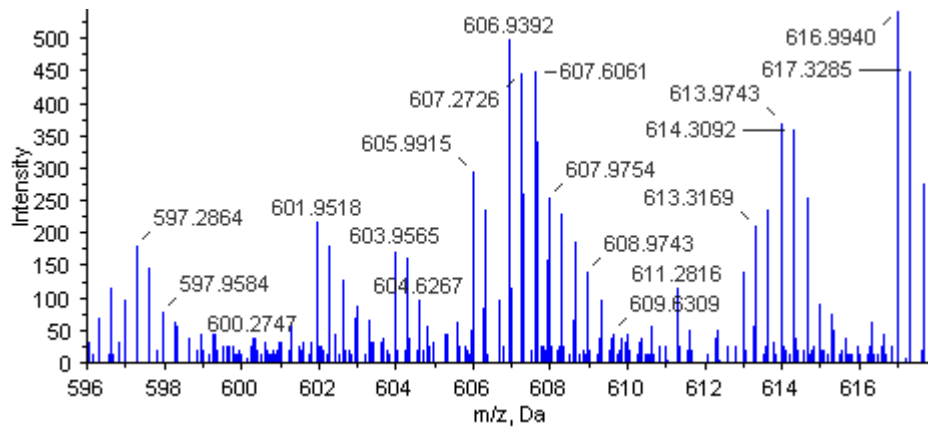

## Sequence Coverage and Matched peptides: in different color

MKSVAQRCL EDTIKD TDISILYFLSGLTCTDENFIIKSGAQR**AASSEGVALIAPDTS**PRGLNVEGEADS  
WDFGVGAGFYLNATQEKWKNWR**MYDYVVKELPKLLSDNFPQLDTS**RASLSGHSMGGHGALTIYLKNL DK  
YK**SVSAFAPISNPINCPWGQKAF**TNYLGSSKGDWEEYDATSLVSKFHDV SATILIDQGEDDKFLHDKQL  
LPQK**FEEACRSANVPLLLR**MQPGYDHSYFFISTFIDDHIRHHAQALNL



# Protein No.: I-329

Protein name and Species:

Predicted protein OS=Populus trichocarpa

GN=POPTRDRAFT\_647799 PE=4 SV=1

Accession: [tr|B9H2B8|B9H2B8\\_POPTR](#)

Unused ProtScore: 6.77

Seq Cov %: 30.3

ITRAQ Changed Ratio:

117: 115=E3TL: D3TL= 0.23

116: 114=E5TL: D5TL= 0.75

Annotated typical Precursor MS Region:

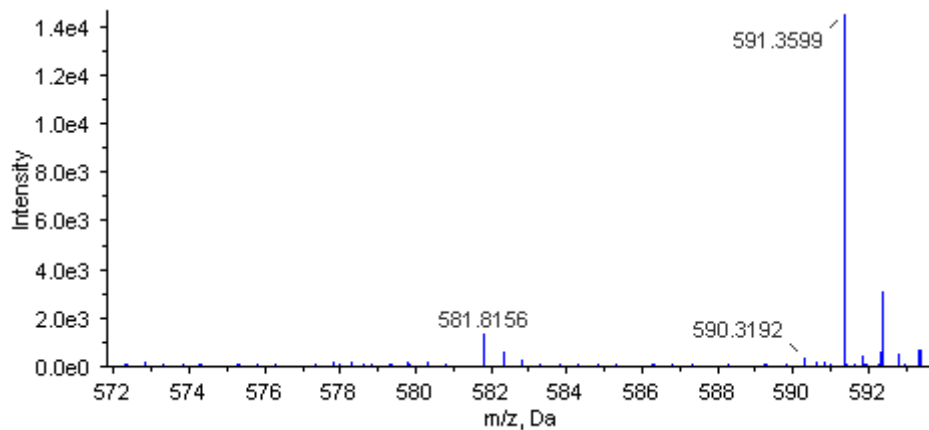

Sequence Coverage and Matched peptides: in different color

MTSQHIATHREKAEIHTGESLCKQKSLELLEEIH**LPMGLLPLDDIVEVGYNR**TTGFVWLKQKKRKDHRF  
LKIGRQVSYDT**EVTAFVENR**RMRLTGVKTKELLFWVVISDIYVDEK**DLEKITFGNPTGISRTFPVSAF**  
**ELEEEKK**

# Protein No.: I-335

Protein name and Species:

L-asparaginase, putative OS=Ricinus communis

GN=RCOM\_1467530 PE=4 SV=1

Accession: [tr|B9RLJ0|B9RLJ0\\_RICCO](#)

Unused ProtScore: 6.7

Seq Cov %: 24.3

ITRAQ Changed Ratio:

117: 115=E3TL: D3TL= 0.37

116: 114=E5TL: D5TL= 0.53

Annotated typical Precursor MS Region:

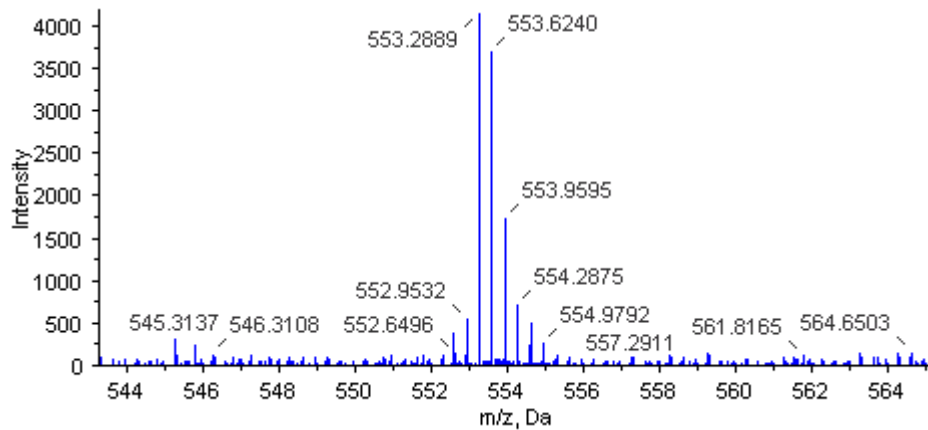

Sequence Coverage and Matched peptides: in different color

MGWAIALHGGAGDIPLNLPPEPRLPREAALRHCLIEIGVAALQAQK**HPLDVVELVVRELENHPNFNAGKG**  
**SVLTTEGTVEMEACIMDGK**TKKCGAVSGLTTVVNAISLARLVMEKTPHIYLAFDG**AEAFAREQGVETVD**  
**SSQFVTPENVER**LKQAKEANRV**QIDYTQPIQK**NEETQNPADGDSQIG**TVGCVAVDTNGNLSATSTGG**  
**LVNKMVGRIGDTPIIIGAGTYANNLCAVSATGK**GEF**IIRGT**VARDVAALMEYKGLSLMEAAAAYVVEQCVP  
RATVGLVAVSATGEVTMPFNNTTGMFRACATEDGYSEIAIWPPVQD

## Protein No.: I-338

**Protein name and Species:**

**Chorismate synthase OS=Populus trichocarpa GN=CS1 PE=3**

**SV=1**

**Accession: tr|B9HLM0|B9HLM0\_POPTR**

**Unused ProtScore: 6.66**

**Seq Cov %: 12.1**

**ITRAQ Changed Ratio:**

**117: 115=E3TL: D3TL= 0.61**

**116: 114=E5TL: D5TL= 1.26**

**Annotated typical Precursor MS Region:**

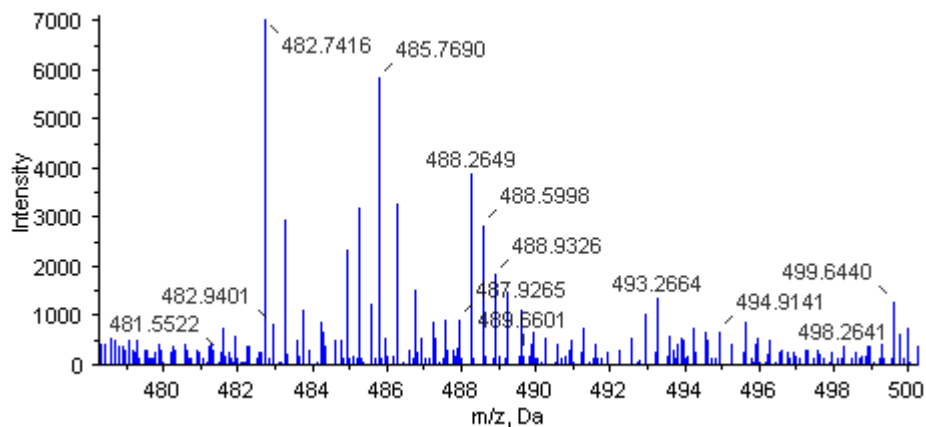

## Sequence Coverage and Matched peptides: in different color

MASSTLTSKSFLDSSRIDTASLSSAHLRKLKSFSSVQISSRSRLPKKLQINAAGSTFGNNFR**VTTFGESH**  
**GGGVGCIIDGCPPR**IPLSESDMQFDLDRRRPGQSRITTPRKETDTCKISSGVSEGQTTGTPIHVFPNT  
DQRGFDYNEM**SVAYR**PSHADATYDMKYGVRSVQGGGRSSARETIGRV**AAGAVAK**KILK**LYAGTEILAYV**  
**SQVHK**VVLPEGVVNHDSLSDQIESNIVRCPDPE**YAEKMIAAIDAVR**VK**GDSVGGVVT****CIVR**NAPRGLG  
SP**VFDKLEAELAK**AAMSLPATKGFEEFGSGFSGTFLSGSEHNDEFYTDEHGRIRTRTNRSGGIQGGISNG  
EIIINLR**IAFKPTSTIGR**KQHTVTRDKKEIELIARGR**HDP****CVVPR**AVPMVEAMVALVLMQQLMAQFSQSY  
LFPINPDLQEPLTMPRLEAANASV

# Protein No.: I-343

**Protein name and Species:**

**40S ribosomal protein S11, putative OS=Ricinus communis**

**GN=RCOM\_0658740 PE=3 SV=1**

**Accession: tr|B9SKG4|B9SKG4\_RICCO**

**Unused ProtScore: 6.6**

**Seq Cov %: 17.6**

**ITRAQ Changed Ratio:**

**117: 115=E3TL: D3TL= 2.09**

**116: 114=E5TL: D5TL= 0.82**

**Annotated typical Precursor MS Region:**

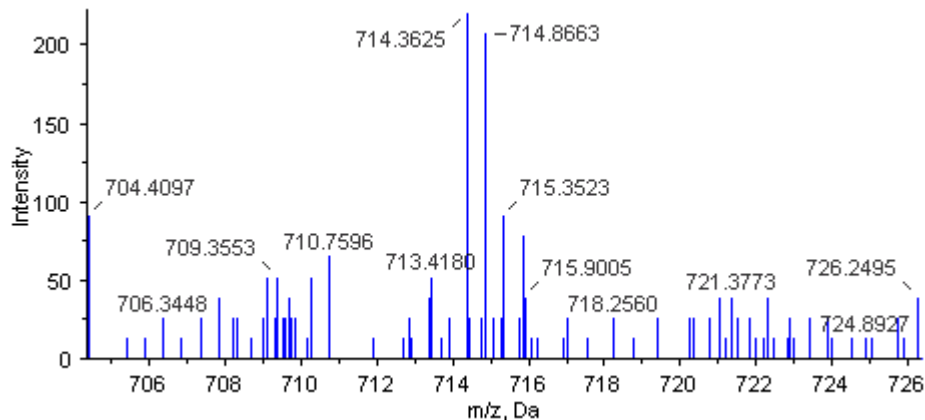

**Sequence Coverage and Matched peptides: in different color**

MAEQTEKAFLKQPKVFLSSKKTGKGRPGKGGNRFWKSIGLGFKTPREAIEGTYIDKKPCPFTGTVSIRG  
RILAGTCHSAKMNRRTIIVRRNYLHFIKKYQRYEKRHSNIPAHISPCFRVKEGDHVIIGQCRPLSKTIVRF  
NVLKVIPAGSSGGAKKAFTAM

## Protein No.: I-345

**Protein name and Species:**

**JHL07K02.17 protein OS=Jatropha curcas GN=JHL07K02.17**

**PE=4 SV=1**

**Accession: tr|E6NU17|E6NU17\_9ROSI**

**Unused ProtScore: 6.54**

**Seq Cov %: 6.8**

**ITRAQ Changed Ratio:**

**117: 115=E3TL: D3TL= 0.33**

**116: 114=E5TL: D5TL= 1.27**

**Annotated typical Precursor MS Region:**

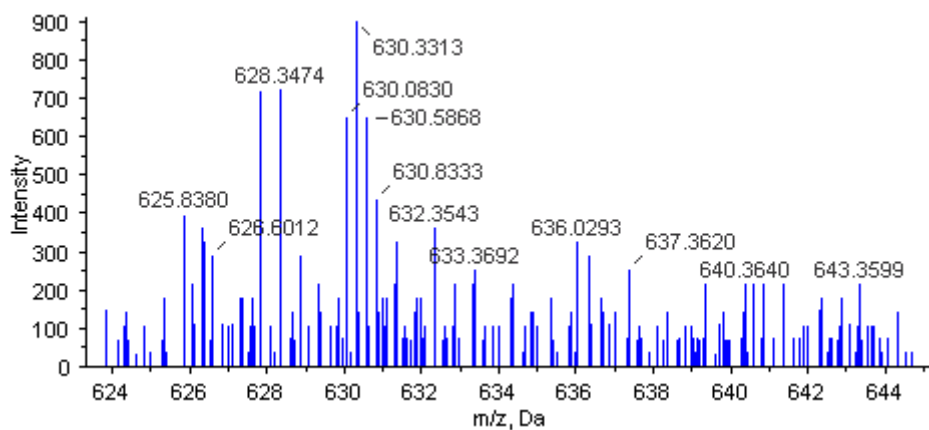

## Sequence Coverage and Matched peptides: in different color

MGNCCSDEAGGRAAVGGTGTASAGHTTTANDAIDYYLKSFRGMFFQIELSFSATNLRDRDVLKSDP  
MVVVYTKGRDEPPTTEVFRTEVVLNSLNPTWITKYSITFQFEVVQTLQFHVYDVDVDTQFHNVDVKMLKLDE  
QQFLGEASCVLSEIVTRPNRTLTLDLVHKDSTISSQPRCGQLVVHAEECISSKTTTQMTLRCSBLEHKD  
LFSRINPFLVISKTVESGMPPIPVCKTEVLKNDHSPVWKPVFLNIQQVGSKDSPLVIECYNFNSSGKHDL  
IGEVKSLADLEKLCSTGAGQNLFLQTAVGHDHSAKLSQLFVDNFSESIQYTFLDYLGKGCENFMVA  
IDFTASNGNPRLLPDSLHYIDPSGRPNAYQQAILEVGEVLQFYDSDKRFPWGFARPIDGPVSHCFNLS  
GSTNHCEVEGIQGITSYTSALFNVSLAGPTLFGPVISNAAHIAQSIANGGKKYFVLLIITDGVVTDL  
QETKDAIVKASDLPLSILIVGVGGADFKEMEILDADKGERLESSTGRVASRDIQVQVFPFRSIQSQQISV  
VQALLAELPTQFLTYMRSRNIQPNI

## Protein No.: I-348

**Protein name and Species:**

**Hydrolase, hydrolyzing O-glycosyl compounds, putative**  
**OS=Ricinus communis GN=RCOM\_0750500 PE=4 SV=1**

**Accession: tr|B9SUE9|B9SUE9\_RICCO**

**Unused ProtScore: 6.52**

**Seq Cov %: 7**

**ITRAQ Changed Ratio:**

**117: 115=E3TL: D3TL= 31.33**

**116: 114=E5TL: D5TL= 2.51**

**Annotated typical Precursor MS Region:**

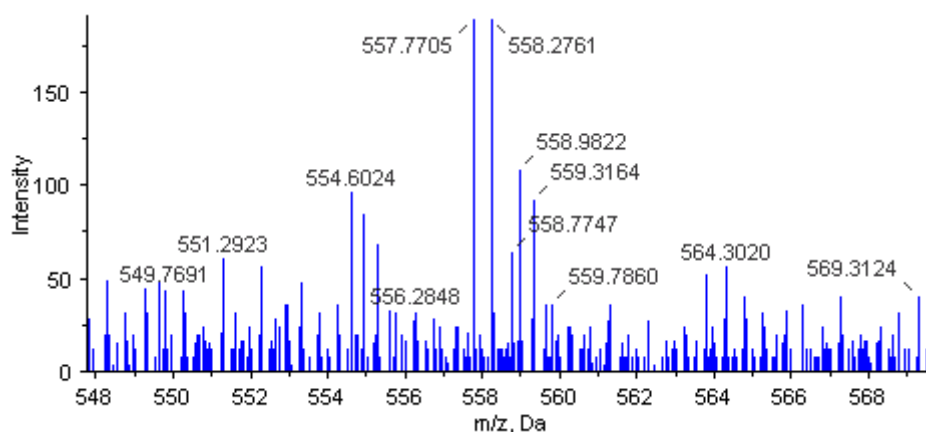



## Sequence Coverage and Matched peptides: in different color

MT**VTPNISINDGNLVVHGK**TILTRVPDNIIVLTPGSGVGLLAGAFIGASAADSKSLHVFPVGVLEGLRFM  
CCFRFKLWWMQTQRMGTGCGK**DIPLETQFMLVESK**DGGEGVDQDDAQTIYTVFLPLLEGQFRAVLQNEKS  
EMEICLESQDGTAVETNQGHYLVYMHAGTNPFEVINQAVKAVEKHMQTFLHREKKKVTISFFFFYIKNFY  
HKHCEAESASISSFVLLVLCSCPLFLTGLAGLK**HVVEDAK**KHHNVKYVYAWHALAGYGGVGPAAAGME  
HYDTALAYPMSSPGVKGNQPDIVMDSLSVHGLGLVHPKKVFNFYNELHAYLASCIDGVK**VDVQNIET**  
**LGAGHGGR**VSLTR**SYHQALEASIR**NFPDNGCIACMCHNTDGLYSAKQTAVVR**ASDDFYPR**DPASHTIH  
ISSVVYNSLFLGFEFMQPDWDMFHSLSLHPAADYHGAARAIGGCPYVSDKPGNHNFELLKK**LVLPDGSVLR**  
**AQLPGRPTR**DCLFADPARDGTSLKLVWNMNKCTGVVGVFNCQGAGWCKIEKKTR**IHDASPGTLTASVRA**  
SDVDCIAQVANADWNGETVVYAHRSADVIRLPKGASLPVTLKVLEYELFHFPCPIKEIISNISFAPIGLL  
DMFNSSGAVDQVEIRTASDGKPELFDGEVSSSELTTSLSENRSPTATIEMRRPLKCLVGGAE'ETDFNYDSD  
SGLLTLTLPVPEEDMYRWPVEIHV

# Protein No.: I-349

**Protein name and Species:**

**60S ribosomal protein L12, putative OS=Ricinus communis**

**GN=RCOM\_0153900 PE=3 SV=1**

**Accession: tr|B9SWB0|B9SWB0\_RICCO**

**Unused ProtScore: 6.51**

**Seq Cov %: 31.9**

**ITRAQ Changed Ratio:**

**117: 115=E3TL: D3TL= 2.42**

**116: 114=E5TL: D5TL= 1.28**

**Annotated typical Precursor MS Region:**

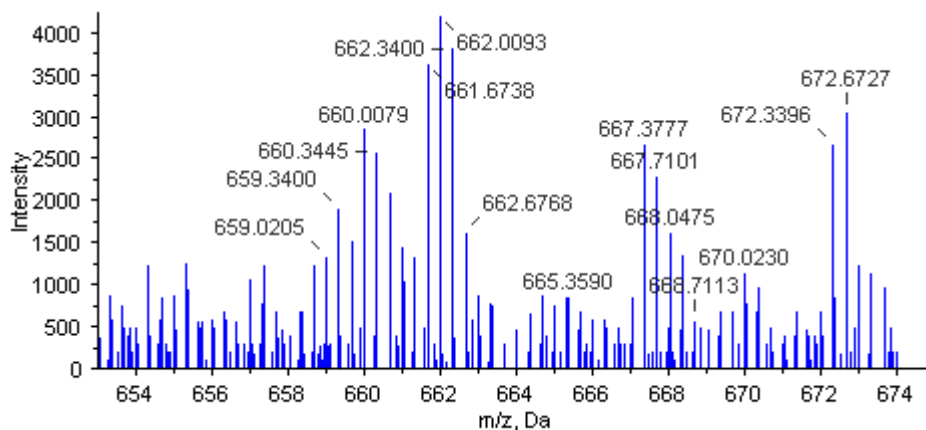

**Sequence Coverage and Matched peptides: in different color**

MPPKFDPSQVVDVFVR**VTGG**EVGA**ASSLAPKIGPLGLSPK**KIGED**IAK**ETAKDWKGLRVTVKLTVQNRQ  
AK**VT**VVPS**SAAALVIK**ALKEPERDRKKTKN**IKHSGN**ISLDDV**IEIAK**VMKPR.SMA**KDLSG**TV**KEILG**TCV  
**SVGCTVDGK**DPKDLQQEITDGDVEVPLD

## Protein No.: I-350

**Protein name and Species:**

**developmentally-regulated GTP-binding protein OS=Populus  
trichocarpa GN=POPTRDRAFT\_718912 PE=4 SV=1**

**Accession: tr|B9HG22|B9HG22\_POPTR**

**Unused ProtScore: 6.49**

**Seq Cov %: 14.7**

**ITRAQ Changed Ratio:**

**117: 115=E3TL: D3TL= 0.48**

**116: 114=E5TL: D5TL= 0.84**

**Annotated typical Precursor MS Region:**

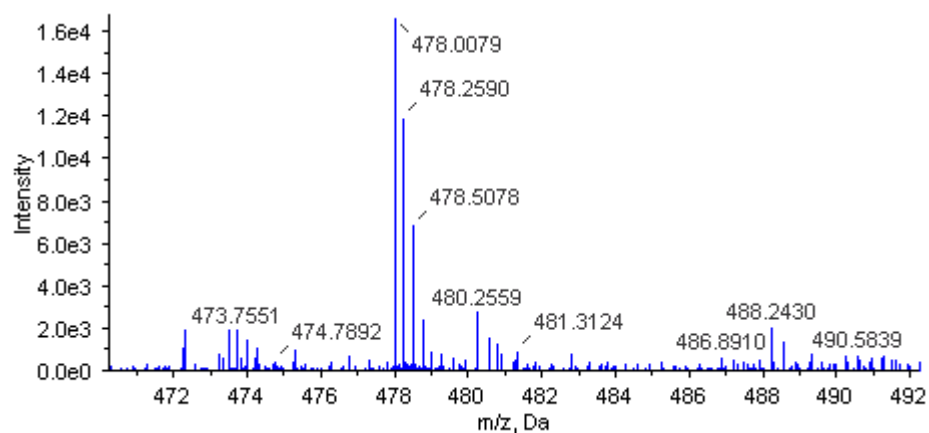

## Sequence Coverage and Matched peptides: in different color

MSTVMQIKIKDIEDEMARTQKNKATAHHLGLLKAKLAKLRRELLEPSAKGGGGAGQGFDVTKSGDARVGL  
VGFPSVVGKSTLLNKLGTGFSEVASYEFTTLCIPGVIVYKGAKIQLLDLPGIIEGAKDGKGRGRQVIST  
ARTCNCILIVLDAIKPITHKRLIEKELEEGFGIRLNKEPPNLTFRKKDKGGINFSTSTVANTHLDLDTVKA  
ICSEYRMHNADITLRYDATADDLIDVIEGSR IYMPCIVVVKIDQITLLEELEILDKLPHYCPVSAHLEW  
NLDGLLDKVWEYLNLTTRIYTKPKGMNPDYEDPVILSSKRTVEDFCER IHKDMLKQFKYALVWGSSAKH  
KPQRVGKEHELEDEDVVQIIKKV

# Protein No.: I-351

Protein name and Species:

Cis-prenyl transferase OS=Hevea brasiliensis GN=HbCPT PE=2

SV=1

Accession: [tr|A9ZN23|A9ZN23\\_HEVBR](#)

Unused ProtScore: 6.48

Seq Cov %: 37.8

ITRAQ Changed Ratio:

117: 115=E3TL: D3TL= 0.39

116: 114=E5TL: D5TL= 0.72

Annotated typical Precursor MS Region:

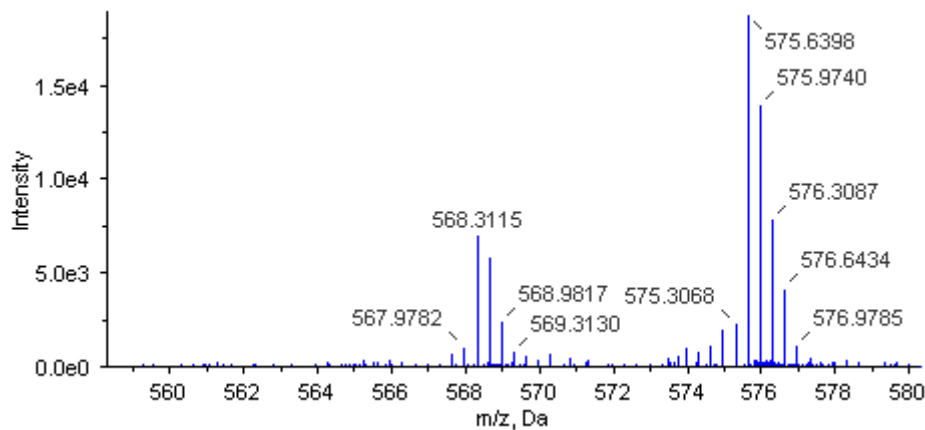

Sequence Coverage and Matched peptides: in different color

MELYN GERPSVFRLLGKYMRKGLYGILTQGP I PTHLAFILDGNR RFAKKHKLPEGGGHKAGFLALLNLVLT  
TYCYELGVK YATIYAFSIDNFR RKPHEVQYVMDL MLEKIEGMIM EESIINAYDICVRFVGNLKL LSEPV  
KTAADQSMRATANNRFRVLLI AVAYSSTDEIVH AVEESSKDKLNSNEVCNNGIEAEQEFKEANGT GNSV  
IPVQKTESYSGIKLVDLEKNTYINPYPDV LIRTSGETRLSNYLLWQTTNCILYSPYALWPEIGLRHV VV  
SVINFQRHYSYLEKHKEYLK

# Protein No.: I-355

**Protein name and Species:**

**40S ribosomal protein S14, putative OS=Ricinus communis**

**GN=RCOM\_0632900 PE=3 SV=1**

**Accession: tr|B9S120|B9S120\_RICCO**

**Unused ProtScore: 6.46**

**Seq Cov %: 22.7**

**ITRAQ Changed Ratio:**

**117: 115=E3TL: D3TL= 2.27**

**116: 114=E5TL: D5TL= 0.86**

**Annotated typical Precursor MS Region:**

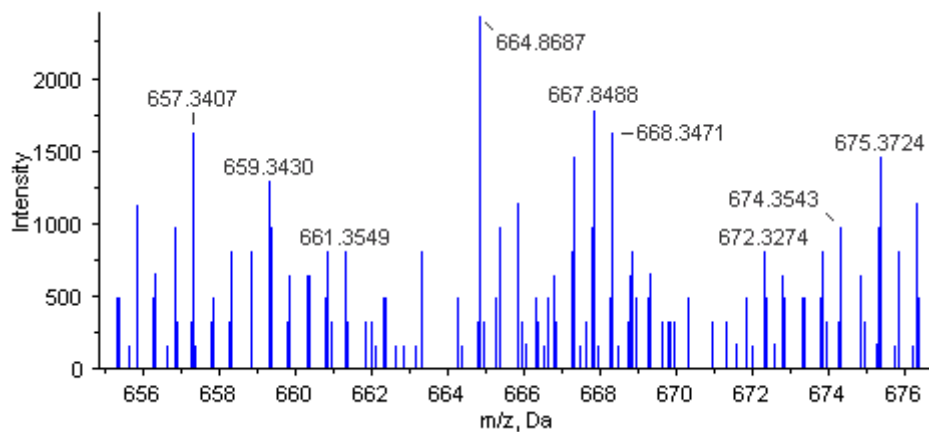

**Sequence Coverage and Matched peptides: in different color**

MSKKKTR**EPK****EENVTLGPAVR**EGEHVFGVAHIFASFNDTFIHVTDLSGRETLVRLITGGMKVK**ADRD**ESS  
PYAAMLAAQDV**TQR**CK**ELGITALHIK**LRATGGNKTK**TPGPQAQSALR**ALARSGMRIGR**IEDVTP**IP**TDS**  
**TRRKGRRGRRL**

# Protein No.: I-357

Protein name and Species:

Rubber elongation factor OS=Hevea brasiliensis GN=REF PE=2

SV=1

Accession: [tr|Q6T708|Q6T708\\_HEVBR](#)

Unused ProtScore: 6.44

Seq Cov %: 64

ITRAQ Changed Ratio:

117: 115=E3TL: D3TL= 0.51

116: 114=E5TL: D5TL= 1.17

Annotated typical Precursor MS Region:

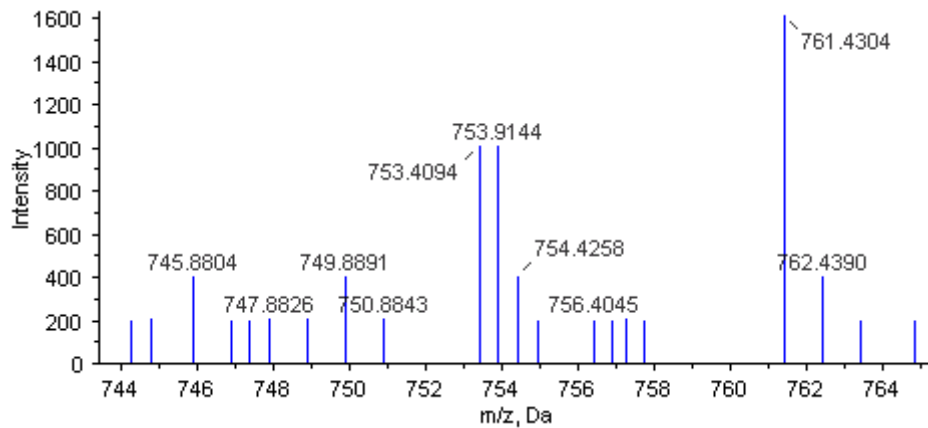

Sequence Coverage and Matched peptides: in different color

MAEGEEEVNIQEEANKGEENPQEEANIQEETNKGEENIQEEANIEEEANKEEESLKYLDFVQAATVYAR  
ASFSKLYLFAKDKSGPFKPGVNTVESRFKSVVRPVYNKEQPVPNKVLKFAADR RVDAYVTVLDRIVPPIV  
KRASIQAYSVAPGAALAVASYLPLHTKRLSKVLYGDG

# Protein No.: I-364

**Protein name and Species:**

**chitinase, Class I (Fragment) OS=Gossypium hirsutum PE=2**

**SV=1**

**Accession: tr|Q9ZTT8|Q9ZTT8\_GOSHI**

**Unused ProtScore: 6.34**

**Seq Cov %: 13.9**

**ITRAQ Changed Ratio:**

**117: 115=E3TL: D3TL=0.60**

**116: 114=E5TL: D5TL=0.62**

**Annotated typical Precursor MS Region:**

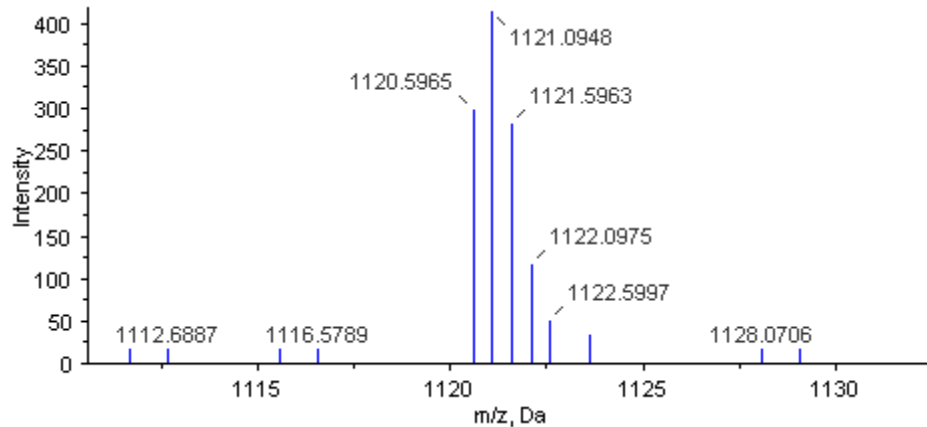

**Sequence Coverage and Matched peptides: in different color**

**EQ**CGRQAGGALCP**GGLCCSQFGWCGSTADYCTV**PGCQSQCSCSGSPAPGPGGLTNLISRETFNRMLLHRN  
DGACPARGFYTYDAFIAAARSFPAPAFATTGDQATRKREIAAFLAQTSHETTGGAGWAAPDGPYAWGYCYN  
R**ELNPP**SSYCASGPNYPCSPGKQYFGRGPMQLSWNYNYGPCGRAIGVDLLNPDLLSSDPT**V**SFKSAFW  
FWMTPQSPKPSCHNVIIGAWSPSSSDRAAGR**ATGYGVITNIINGGLECGK**GWNAQ**VEDRIGFYKRYCDI**  
**LGVSYGNNLDCYNQRPFNG**GVSVDSM



# Protein No.: I-366

**Protein name and Species:**

**Protease inhibitor protein OS=Hevea brasiliensis PE=4 SV=1**

**Accession: [tr|B3FNP9|B3FNP9\\_HEVBR](#)**

**Unused ProtScore: 6.31**

**Seq Cov %: 67.1**

**ITRAQ Changed Ratio:**

**117: 115=E3TL: D3TL=2.78**

**116: 114=E5TL: D5TL=1.56**

**Annotated typical Precursor MS Region:**

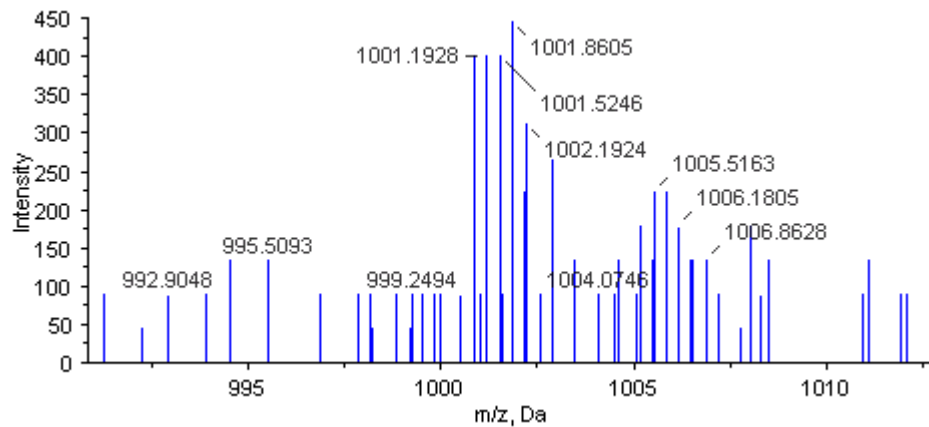

**Sequence Coverage and Matched peptides: in different color**

MASQCPVK**DAWPELIGTNGDIAAGIIE**TENANVKAIIVL**K**KGSPMTMEYNLCRVLV**FVDDNR**VVTQAPVI  
G

# Protein No.: I-369

**Protein name and Species:**

**Ras-related protein RABB1b-like OS=Populus trichocarpa**

**GN=POPTRDRAFT\_648984 PE=2 SV=1**

**Accession: tr|A9P8X5|A9P8X5\_POPTR**

**Unused ProtScore: 6.2**

**Seq Cov %: 51.7**

**ITRAQ Changed Ratio:**

**117: 115=E3TL: D3TL=2.61**

**116: 114=E5TL: D5TL=1.12**

**Annotated typical Precursor MS Region:**

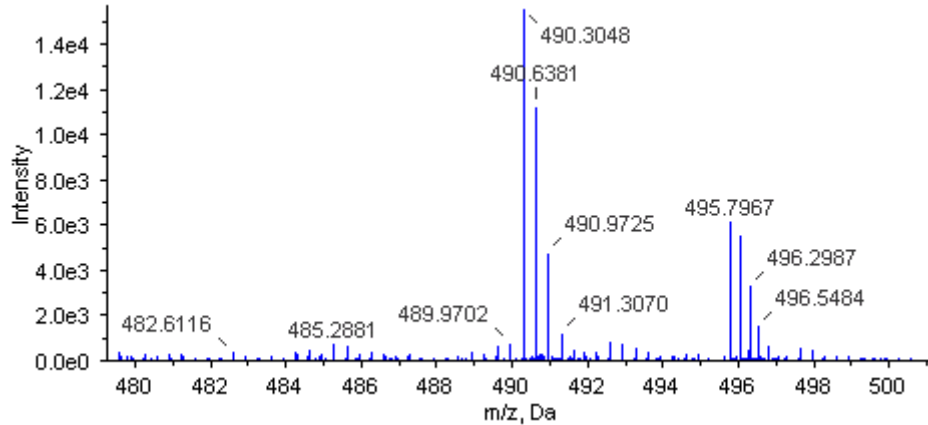

**Sequence Coverage and Matched peptides: in different color**

MSYDYL~~LFKY~~**YIIIGD**TGVGK**SC**LL**LQ**FTDKR~~FQ~~PVHDLTIGVEFGAR**MVTIDAR**PIK**LQ**IWD**TAGQ**ESFR  
SITRSYY**RGAAG**ALLVYDITRRETFNHLASWLE**DARQ**HANPNMS**IM**L**IGNK**CDLAHRR**AVSKEE**GEQ**FA**  
**KENGL**L**FLEASAR**TAQNVEEAFIGTAGK**ILQNIQ**EGVFDVSN**ESSGIK**VGYGR**PQGASGAR**DGTVAQ**RG**  
GCCS

## Protein No.: I-370

**Protein name and Species:**

**Asparaginyl-tRNA synthetase, cytoplasmic 1-like [Vitis vinifera]**

**OS=Vitis vinifera GN=VIT\_11s0016g02680 PE=3 SV=1**

**Accession: tr|F6HGX0|F6HGX0\_VITVI**

**Unused ProtScore: 6.18**

**Seq Cov %: 11.2**

**ITRAQ Changed Ratio:**

**117: 115=E3TL: D3TL=1.64**

**116: 114=E5TL: D5TL=1.17**

**Annotated typical Precursor MS Region:**

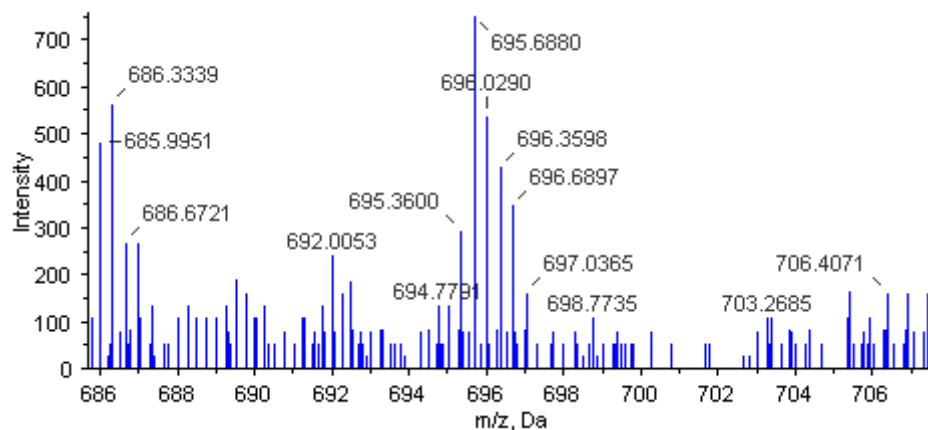

## Sequence Coverage and Matched peptides: in different color

MAEDSVPPVDQMALATLNDDVSTPFVKAQFSDRHLIRTIILSRPDGGAGL**AGQTVK**VGGWVKTGREQGKG  
SFAFLELNDGSCPANLQVIVDAAVAPLGQLVQTGTCVHV**EGLLK**VPPEGTKQRVELRVEK**VHHVGPVDP**  
**AKYPLPKTRLTLEFLR**DFVHFRPR**TNTISAVAR**IRNALAYATHHTFFQNHGFLYIHTPIITTSDCGAGE  
MFQVTTLISDAEKVEK**ELIKNPPPSEADIEAAK**ALVKEKGEAVAQLKSAKASK**GEITASVAELNK**AKEN  
LSRLEERSKCLKPGIPQKDGKIDYSQDFFARQAFLTVSGQLQVETYACAVSSVYTFGPTFRAEHSHTSRH  
LAEFWMVEPEIAFADLKDDMNCA**EAYVK**FLCQWLLDNCIDDMEFMAKNFDKGCIDRLRMVASTPFER**IS**  
**YTEAIKL****LEEAVK**KDKKFENKVEWGIDLASEHERFLT**EVLFK**KPVIVHDYPKGIA**AFYMR**LNDDMK**TVA**  
**AMDVLVPK**VGELIGGSQREERYEVIKRILEMGLPLEPYEWY**LDLRR**YGTVK**HCGFGLGFERMILFATG**  
**IDNIRDVIPFP**YPGRADL

# Protein No.: I-371

**Protein name and Species:**

**S-adenosyl-methionine-sterol-C-methyltransferase OS=Ricinus communis PE=2 SV=1**

**Accession: tr|O24328|O24328\_RICCO**

**Unused ProtScore: 6.18**

**Seq Cov %: 17.6**

**ITRAQ Changed Ratio:**

**117: 115=E3TL: D3TL=0.63**

**116: 114=E5TL: D5TL=1.24**

**Annotated typical Precursor MS Region:**

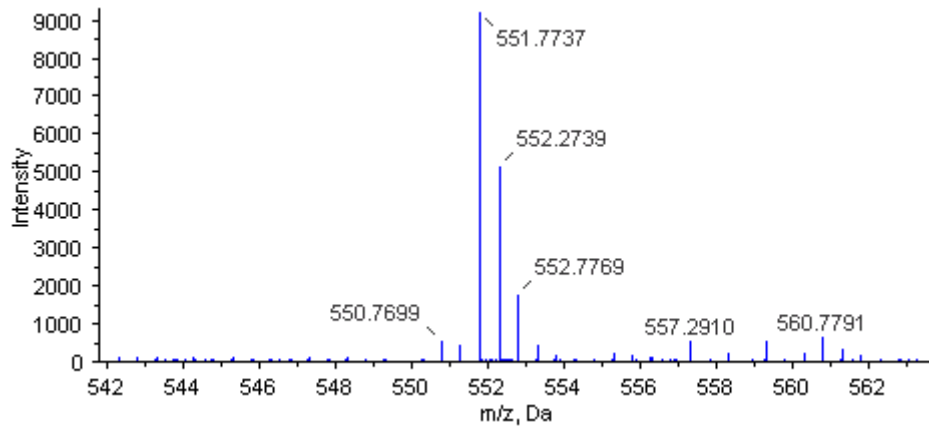

**Sequence Coverage and Matched peptides: in different color**

MSKAGALDLASGVGGKIDKNEVLSAVEKYEKYHVYYGGAAEEERKANYTDMVNKYYDLVTSFYEFGWGES  
FHFahrRFKGESLRRESIKRHEHFLALQLGLKPEQKVL DVGCGIGGPLREISRFSLT SVTGLNNNEYQITR  
GKVLNR IAGVDKTCDFVKADFMKMPFPANSFDAVYAIEATCHAPDAYGCYSEIYRVLKPGQFFAAYEWC  
MTDSFDPNNQEHQKIKAEIEIGDGLPDIRLTGQCIEALKKAGFDVIWSGDLTASSPVPWYLP LDKNQYS  
LTGFRLTAIGRFFTRNMIKALEFAGLAPKGSQRVQDFLEKAAEGLVEGGRKEIFTPMFFFLAQKPHSEN  
Q

## Protein No.: I-372

**Protein name and Species:**

**60S ribosomal protein L4 [Vitis vinifera] OS=Vitis vinifera**

**GN=VIT\_08s0040g03200 PE=4 SV=1**

**Accession: tr|F6HQV3|F6HQV3\_VITVI**

**Unused ProtScore: 6.14**

**Seq Cov %: 8.1**

**ITRAQ Changed Ratio:**

**117: 115=E3TL: D3TL=2.31**

**116: 114=E5TL: D5TL=2.14**

**Annotated typical Precursor MS Region:**

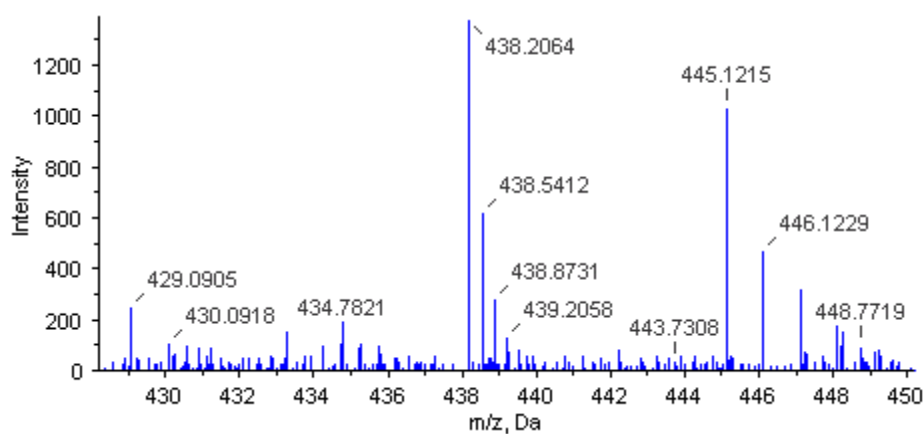

## Sequence Coverage and Matched peptides: in different color

MAAAAARPLVTVQVLKSDMATDGGNAVPLPDVMKASIRPDIVTFVHSNISKNSRQPYAVSRRAGHQ TSA  
ESWGTGRAVSRI PRVPGGGTHR **AGQGAFGNMCR** **GGRMFAPTK** IWRRWHRK INVNQKRYAVVSAIAASAI  
PSLVMARGHRIESVPELPLVIGDSAESVEKTS **AIDLK** QVGAYP **DAEKAK** DSHAIRPGKGKMRNRRYI  
SRK **GPLIVYGTEGAK** LVKAFR **NIPGVEVANVDR** **LNLLK** LAPGGHLGRFVIWTKSAFEK **LDSIYGSFEK**T  
SEKKNGYLLPRSKMVNADLAR **IINSDEVQSVVRP** **IK** KEVKRAPMKNPLK **NLNTMLK** LNPYAKTARRMA  
LLAEAQRVKAKQEKLDKKRKQIPKEEVAAIKAAGKAWYQTMISDSYTEFDNF SKWLGVSQ

## Protein No.: I-373

**Protein name and Species:**

**Malate dehydrogenase OS=Ricinus communis**

**GN=RCOM\_1520380 PE=3 SV=1**

**Accession: tr|B9SE47|B9SE47\_RICCO**

**Unused ProtScore: 6.14**

**Seq Cov %: 13.6**

**ITRAQ Changed Ratio:**

**117: 115=E3TL: D3TL=0.28**

**116: 114=E5TL: D5TL=0.31**

**Annotated typical Precursor MS Region:**

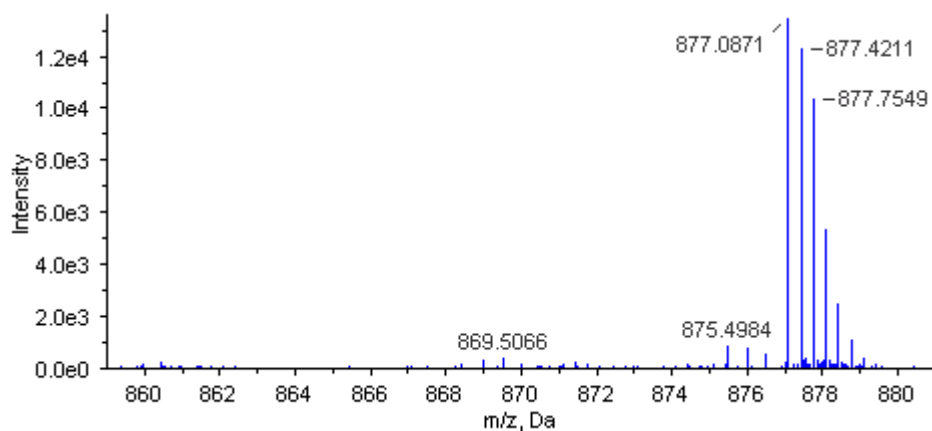



## Sequence Coverage and Matched peptides: in different color

MRSSLFRSVKALGSTSSSSHLLRRGYASEAVPDRK**VAVLGAAGGIGQPLALLMK**LNPLVSNLALYDIAN  
TPGVAADVSHINTRSDVKGYVGEDQLGK**ALEGS DVVIIPAGVPR**KPGMTR**DDLFNINAGIVK**GLCEAIA  
KYCPNALVNMLSNPVNSTVPIAAEVFKKAGTYDEKRLFGVTTLDVVRAKTFYAGKAKVPVAE VNVVVG  
GHAGITILPLLSQATPK**ANLPDEEIVALTK**RTQDGGTEVVEAKAGKGSATLSMAYAGAI FADACLKGLN  
GVPDVVECSFVQSTVTELPFFASKVRLGK**NGVEEVLGLGPLSDYEK**EGLEK LKPELLSSIEKGINFANK

## Protein No.: I-374

**Protein name and Species:**

**Alcohol dehydrogenase, putative OS=Ricinus communis**

**GN=RCOM\_0605880 PE=4 SV=1**

**Accession: tr|B9SUZ4|B9SUZ4\_RICCO**

**Unused ProtScore: 6.12**

**Seq Cov %: 18.5**

**ITRAQ Changed Ratio:**

**117: 115=E3TL: D3TL=0.09**

**116: 114=E5TL: D5TL=0.29**

**Annotated typical Precursor MS Region:**

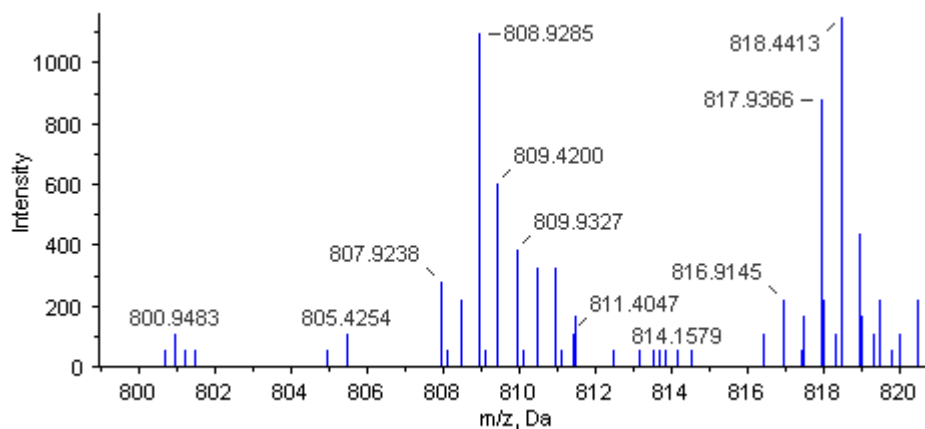

## Sequence Coverage and Matched peptides: in different color

MTSKESVHRNSRRKAIDYREMAEAEVVSNNKQVIFKEYVSGFPKESDMYMTTSSVKLQVEEGSTSVLVK  
NLYLS<sup>CDPYMR</sup>GRMRNTPSDDPEFSPLHPGSPVFGGLGVAK<sup>VVDSGHPGFK</sup>KGDLVWGSTRWEEYTLITA  
PEGLFKIHHTDIPLSYTGLLGMPGITAYFGLNDICTPKKGER<sup>VVSAASGAVGQLVGQFAKLMGCYVV</sup>  
<sup>GSAGSKEKVDLLKNKFGFDEAFNYREEHDWNAALKR</sup><sup>YFPEGIDYFENVGGKMLDAVLLNMR</sup>THGRIAA  
CGMISQYNLEHPDGVHNLIVVVHKRIRIQGFISFDYFGQYSK<sup>FLDFVLPYIR</sup>EGKITTYVEDIAEGIESA  
PAALVGLFSGRNVGK<sup>QVVAVAHE</sup>

## Protein No.: I-375

**Protein name and Species:**

**Methionine synthase OS=Camellia sinensis PE=2 SV=1**

**Accession: [tr|G3G858|G3G858\\_CAMSI](#)**

**Unused ProtScore: 6.11**

**Seq Cov %: 17.5**

**ITRAQ Changed Ratio:**

**117: 115=E3TL: D3TL=0.39**

**116: 114=E5TL: D5TL=0.51**

**Annotated typical Precursor MS Region:**

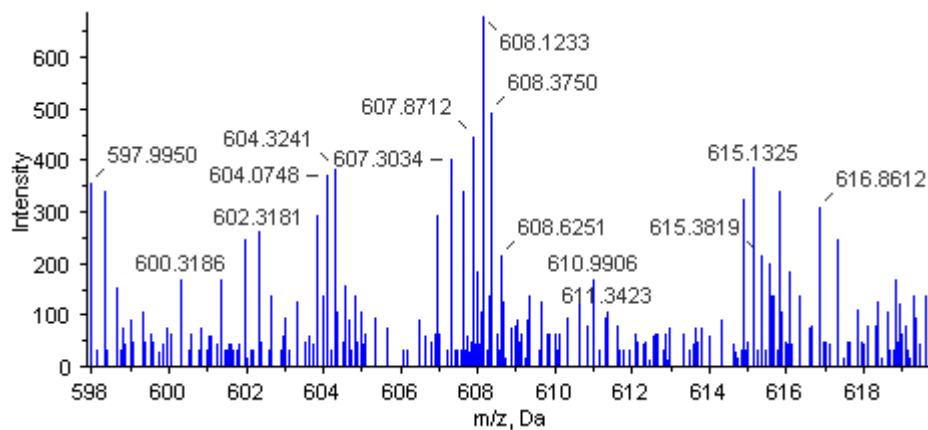

## Sequence Coverage and Matched peptides: in different color

MASHIVGYPRMGPKRELKFALESFWDKSSAEDLKKVAADLRSSIWKQMASAGIKYIPSNTFSSYYDQVL  
DTTAMLGAVPPRYGWTGGEIGFDTYFSMARGNASVPAMEMAKWFDNTYHFIVPELGPEIKFSYASHKAV  
DEYKEAKALGVDTVPVLVGPVSYLLLSKPAKGVEKSFSLLSLLDKILPIYKEVVAELKAAGASWIQFDE  
PTLVKDLQESHQLQAFTAAYSELESALSGLNVIVETVFADVPAAEFKTLTSLKCVTGFDFDLVRGAQTLD  
LITSGFPPSGEYLFAGVVDGRNIWANDLAASLSLLQTLEGIVGKDKLVVSTSCSLHTAVDLVNETKFDK  
ELKSWLAFAAQKVVEVNSLAKALAGHKDEAFFSENAAAQASRKSSPRVTNEAVQKAAAALRGSDHRRAT  
NVSARLDAQQKLNLPILPTTTIGSFPPQTELRVRREYKAKKISEEEYVKAIKEEINKVVKLQEELDI  
DVLVHGEPERNMVEYFGEQLSGFAFSANGWVQSYGSRCKVPPIIIFGDVSRPKAMTVFWSMAQSMTR  
PMKGMLTGPVTILNWSFVRNDQPRFETCYQIALAIKDEVEDLEKAGINVIQMDEAALREGLPLRKSEQA  
FYLDWAVHSFRITNCGVTDTTQIHTHMCYSNFNDI IHSIIDMDADVITIENSRSDEKLLSVFREGVKYG  
AGIGPGVYDIHSPRIPSTEEIADRINKMLQVLETNILWVNPDCGLKTRKYHEVKPALLNMVAAAKQIRT  
QLASAK

# Protein No.: I-382

**Protein name and Species:**

**Trafficking protein particle complex subunit, putative**

**OS=Ricinus communis GN=RCOM\_0183430 PE=4 SV=1**

**Accession: tr|B9SA27|B9SA27\_RICCO**

**Unused ProtScore: 6.03**

**Seq Cov %: 24.2**

**ITRAQ Changed Ratio:**

**117: 115=E3TL: D3TL=1.71**

**116: 114=E5TL: D5TL=1.47**

**Annotated typical Precursor MS Region:**

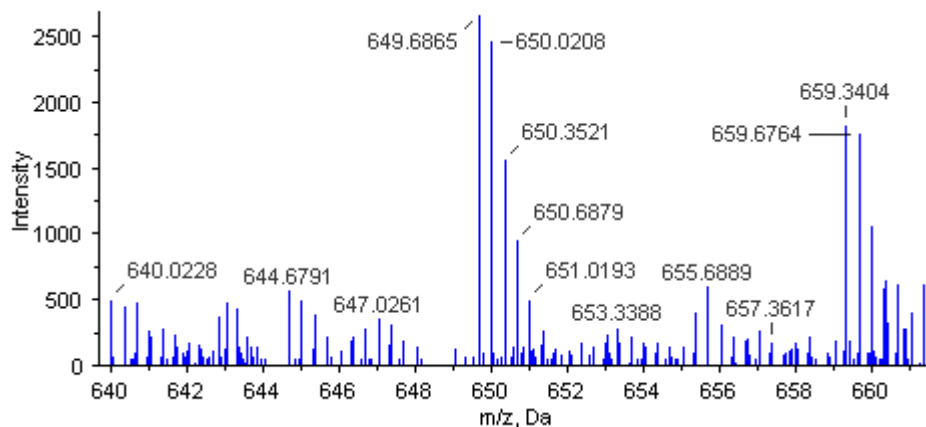

**Sequence Coverage and Matched peptides: in different color**

MAPVGPRSGDAIFASVERVNAELFTLTYGAIVRQLLTDLEEVVEFNKQLDQMGYNIGIRLVDEF~~FLAK~~SN  
VNRCVDFRETAIEVIKVGFKMFLGVSASVTNWDADGTCCSIILEDNPLVDFVELPDTQCGLLYCNIILSG  
VIRGALEMVSMKTEVTWARDMLRGDDAYELQVKLLKQVPEEYPYKDDE

## Protein No.: I-383

**Protein name and Species:**

**Sucrose phosphate phosphatase OS=Malus domestica PE=2**

**SV=1**

**Accession: tr|Q5J3P0|Q5J3P0\_MALDO**

**Unused ProtScore: 6.02**

**Seq Cov %: 9.9**

**ITRAQ Changed Ratio:**

**117: 115=E3TL: D3TL=0.50**

**116: 114=E5TL: D5TL=0.58**

**Annotated typical Precursor MS Region:**

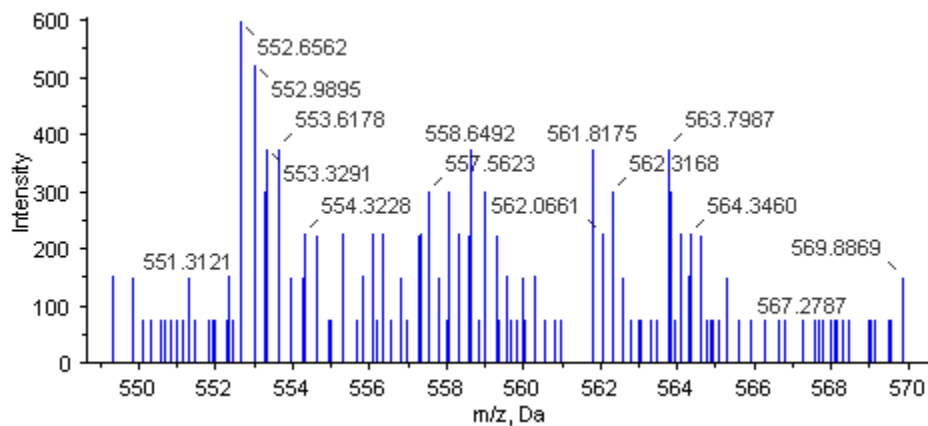

## Sequence Coverage and Matched peptides: in different color

MDRLEAPARLMIVSDL DHTMVDHHD TEN **L S L L R** FNSLWEANYC **H D S L L V F S T G R** SPTLYKELRKEKPML  
TPDITIMSVGTEITYGNAMVPDDGWVEVLNQKWDRNIVKE **E A S K** YSELKLQAETEQRPHKVSFYVEKAK  
AQAVTKALSEVFEKRGLDVK **I I Y S G M D L D I L P Q G A G K G Q A L A Y L L K** KFKSEGSSPVNTLVCGDSGND  
ELFSIPEVYGVMSNAQEELQWHAENAKGNTRI IHATER **C A A G I I Q A I G H F K** LGPSLPPRDIADFSD  
KLENPNPGHELVKFF **L F Y E K** WRRRAEVENSEIYLASLKADCSPSGTFVHPSGVEHSLSDSINALRNCYGD  
KQKQFRVWVDGVLATHVGSNTWLVKFDKWELSGEERYAIKGTAVISSKGSVSDGFTWIRVHQTWYKG  
YEAKDDSTWFF



# Protein No.: I-386

**Protein name and Species:**

**60S ribosomal protein L9, putative OS=Ricinus communis**

**GN=RCOM\_1315040 PE=4 SV=1**

**Accession: tr|B9RYZ1|B9RYZ1\_RICCO**

**Unused ProtScore: 6**

**Seq Cov %: 19.1**

**ITRAQ Changed Ratio:**

**117: 115=E3TL: D3TL=2.19**

**116: 114=E5TL: D5TL=1.74**

**Annotated typical Precursor MS Region:**

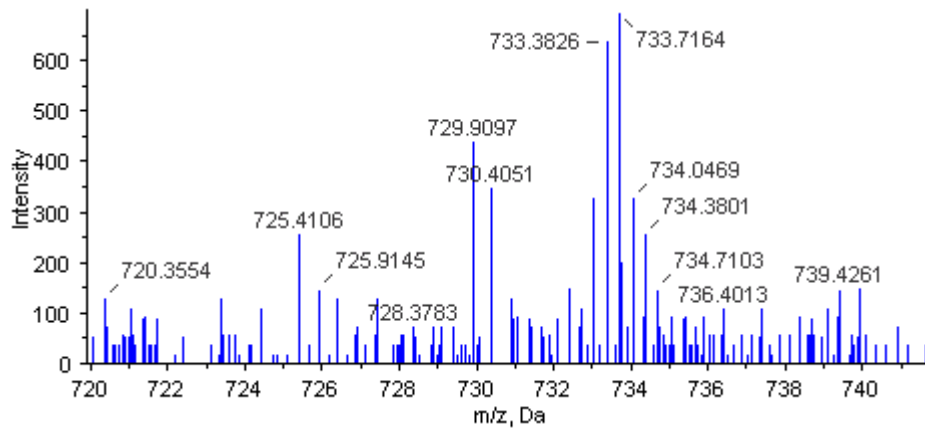

**Sequence Coverage and Matched peptides: in different color**

MKTILSSETMDIPDGVKIKVNAKIIIEVEGPRGKLTNRNFKHLNLLDFQLIKDEETGKRKLLKIEAWFGSRKT  
SAAIR**TALSHVENLITGVTK**GYRYKMRFFVYAH**FPINASITNSNSAIEIR**NFLGEKKVR**KVDMLEGVTVV**  
RSEKVKDELVLVDGNDIELVSRSAALINQKCHVKNKDIRK**FLDGIYVSEK**GTVAEQE

## Protein No.: I-389

**Protein name and Species:**

**Predicted protein OS=Populus trichocarpa**

**GN=POPTRDRAFT\_571988 PE=4 SV=1**

**Accession: tr|B9IBL7|B9IBL7\_POPTR**

**Unused ProtScore: 6**

**Seq Cov %: 6.5**

**ITRAQ Changed Ratio:**

**117: 115=E3TL: D3TL=6.19**

**116: 114=E5TL: D5TL=1.20**

**Annotated typical Precursor MS Region:**

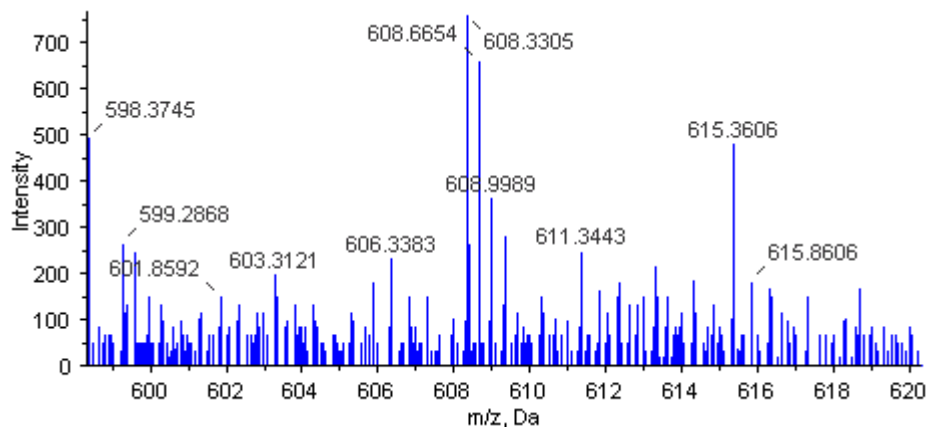

## Sequence Coverage and Matched peptides: in different color

MSWLARSIANSLKFEDDDQQPDKNTTATTTTTSAPTTDNVNNKDLSENSESDQQQSATPRGVKEDLTDLKK  
TLTRQLWGVASFLAPPEPPLTENRSHTSDPDGSNDDDDAALIAGIR**SDFAEIGGR**FKSGITKLSNK  
TVSEFTKIASNLLQLGSESHEIGTTASAVGVTEEVVGFARDVAMHPETWLDPLPDVQGFEDFDMSDAQ  
QEHALAVEHLAPRLAALRIELCPGYMSEGCFWK**IYFVLLHPR**L**SKHDAELLSTPQIVEAR**AMLSHELQN  
KAKAKSTPDWSGVDTSNVKADLPHEESLSVPSRAKSESVPIMTSGIEAVSPTLAAKTSDNAEAPSFVSV  
ESETEKHPVESTQM**QIIDK**SVVEEGKVDQTKHQHSSSSSSSGILEEKFDDDGDDWLKDDSSSEMIGVSGS  
SMPLGNDEDVSFSDLEEDDGDEPASYKKVASGSDCATKGSQDWVQLSRSSADSVKDIKPVSIKNAGSEK  
VSARNSENKESDWDVDDIDVI

# Protein No.: I-390

Protein name and Species:

Putative uncharacterized protein OS=Vitis vinifera

GN=VIT\_19s0015g02610 PE=3 SV=1

Accession: [tr|F6I510|F6I510\\_VITVI](#)

Unused ProtScore: 5.99

Seq Cov %: 18

ITRAQ Changed Ratio:

117: 115=E3TL: D3TL=0.39

116: 114=E5TL: D5TL=0.71

Annotated typical Precursor MS Region:

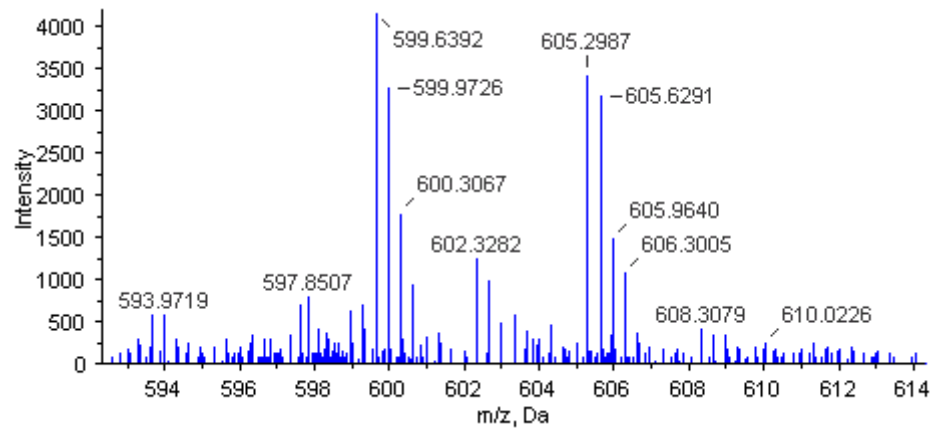

Sequence Coverage and Matched peptides: in different color

MADEIILLDFWPSMFGMRVRL**LALAEK**GLK**YEYRQEDLR**NK**SPLLLEMNPVHK**IPVLIHNGKPICESLI  
IVQYIDEVWVK**DKSPLLPSDPYQR**AQARFWADYVDKPLYELGGKIWSTKGEEQETGK**KEFIECLKLLEGE**  
**LGEKPY**FGGEKIGFVDVALVTFSCWFYAYETFGNFSIEAECPKLVAVTKRCMEKESVSSSLEDPHKVHG  
FIMGMRKRFGEIVR**LALAEK**GLK**YEYKEEDLR**NK**SPLLLEMNPVHK**IPVLIHNGKPICESLIIVQYID  
EVVH**DKSPLLPSDPYQR**AQARFWADYVDKKGFFVQNFVQAGFFFTHSLPKAPSSS

## Protein No.: I-391

**Protein name and Species:**

**Carbonic anhydrase OS=Populus trichocarpa**

**GN=POPTRDRAFT\_666464 PE=3 SV=1**

**Accession: tr|B9IER7|B9IER7\_POPTR**

**Unused ProtScore: 5.98**

**Seq Cov %: 11.8**

**ITRAQ Changed Ratio:**

**117: 115=E3TL: D3TL=0.54**

**116: 114=E5TL: D5TL=1.06**

**Annotated typical Precursor MS Region:**

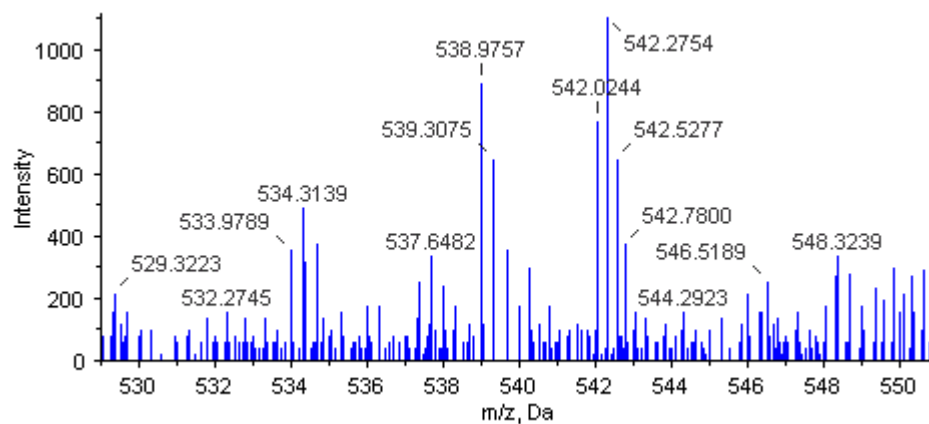

## Sequence Coverage and Matched peptides: in different color

MSNLSHEGAIIEGSKKLLIDNEKDDQLNKEVEAKIEKLIIGELQKRLPDHCDPVGRILEGFHRFKTTKFD  
KYPELYRELAEGQSPKFLVFACSDSRVSPSHVLDFQPGAEAFMVRNIANLVPAFNQLRYSVGATIEYAV  
ATLGVENILVIGHSRCGGIERLMTLPEDGSTANDFVDDWVKIGLPAKAKVEAEFGHLPLPEQIHKCEKE  
AVNLSLINLQTYPYQERMAEGALALRGGYYDFVKGCFELWEVKSTVTPPISTCCK

## Protein No.: I-392

**Protein name and Species:**

**Protein SEY1, putative; root hair defective 3 OS=Ricinus  
communis GN=RCOM\_0312010 PE=4 SV=1**

**Accession: tr|B9SN36|B9SN36\_RICCO**

**Unused ProtScore: 5.95**

**Seq Cov %: 7.6**

**ITRAQ Changed Ratio:**

**117: 115=E3TL: D3TL=5.06**

**116: 114=E5TL: D5TL=1.78**

**Annotated typical Precursor MS Region:**

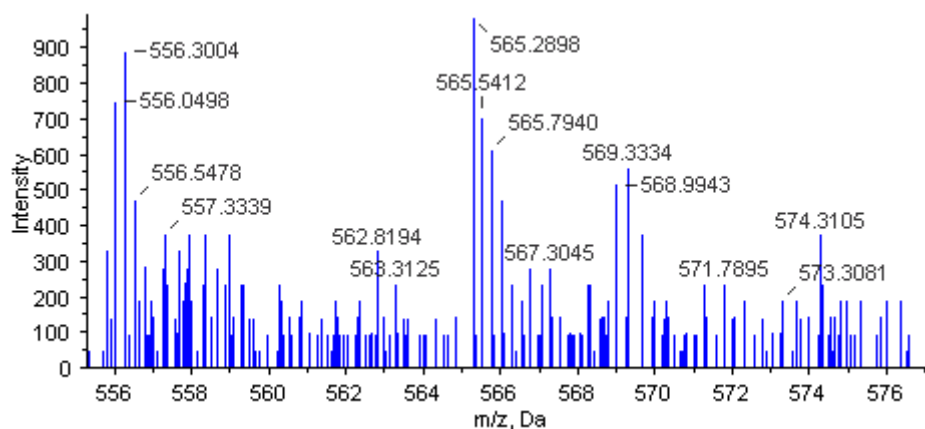

## Sequence Coverage and Matched peptides: in different color

MANSEESCSTQLIDGDGTFNAAGLEHFTKEVRLGECGLSYAVVSIMGPQSSGK**STLLNNLFGTNFR**EMD  
AFRGRSQTTK**GIWLAR****CAGIEP****CTLVMDLEGTDGR**ERGEDDTAFQKQSALFALAVSDIVLINMW**CHDIG**  
**REQAANKPLLK**TVFQVMMRLFSPRKTTLMFVIRDKTR**TPLENLEPVL**REDIQKIWDVAVPKPQEHKETPL  
SEFFNVEVVALSSYEEKEEQFKEQVASLRQR**FFHSIAPGGLAGDR**RGVVPASGFSFSAQQMWKVIKENK  
**DLDLPAHK**VMVATVRC EEIANEKYANFTTNEEWHQIEEAVQSGPVSGFGKLSSTLSTSFSEYDAEAIY  
FDEGVRSAKRKQLEEKLLQLVQPAHQSM LGHIR**SGTL****DK**FKEAFDKALAAGEGFSSAAYSCTQYYMTVF  
DEGCTDAIIEQASWDTSKVRDKLRR**DI****DAHV****SVRAAK****L****SELT****SSFEAK**LNEALSGPVEALLDGATSET  
WPAIRKLLQRESESAVSGLSALAGFDMKQSKDKMLSSLETYARGVVEAKAKEEAGRVLIRMKDRFSM  
LFSHSDSMPRVWTGKEDIRAITKTARSASLKL SVMVAIRLDDEVDNVESTLSSVFLDTKNNAVTER  
SITKTDPLASSTWDEVPSKTLITPVQCKSLWRQFK**AETEYSVTQAI****SAQEANK**RNNNWLP PPWAI VAL  
VVLGFNEFMTLLRNPLYLGFIFVVFLLVKALWVQLDVSGEFRNGALPGLISLSTKFLPTIMNLIK KLA E  
EGQKPATNDPQRNPALAAKSFRNGVGSDDMSTASSGVTSTENGTEFSSASKDD



# Protein No.: I-395

**Protein name and Species:**

**Receptor for activated protein kinase C, putative OS=Ricinus communis GN=RCOM\_0571360 PE=4 SV=1**

**Accession: tr|B9SU88|B9SU88\_RICCO**

**Unused ProtScore: 5.85**

**Seq Cov %: 17.4**

**ITRAQ Changed Ratio:**

**117: 115=E3TL: D3TL=1.75**

**116: 114=E5TL: D5TL=1.46**

**Annotated typical Precursor MS Region:**

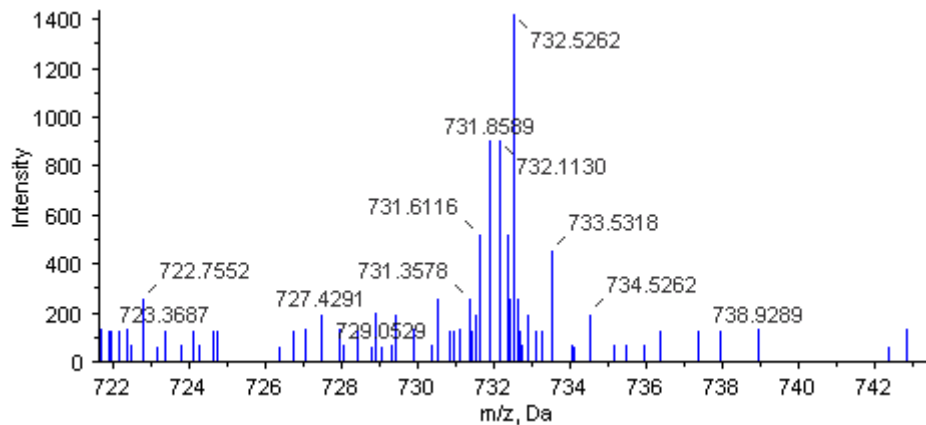

**Sequence Coverage and Matched peptides: in different color**

MAERLILLGTMRAHTDQVTAIATPIDNSDMIVTASRDKSIILWKLKDEKTYGVAHRRLTGHSHFVQDV  
VLSSDGQFALSGSWDGELRLWDLAAGVSARRFVGHGTHKDVLSVAFSIDNRQIVSASRDRTIKLWNTLGE  
KYTIQDGD~~AHNDWVSCVR~~FSPNTLQPTIVSASWDRTVKVVNLTNCKLRLCTLAGHGGYVNTVAVSPDGS  
L~~CASGGKDG~~VILLWDLAEGKRLYNLDAGAVIHALCFSPNRYWLC AATENS IKIWDLESK~~SIVEDLK~~VDLK  
AEAEKSDGSTVASTGAKKKNIYCTSLSWNADGSTLFSGYTDGVIIRVWGIGRF

# Protein No.: I-401

**Protein name and Species:**

**Fumarylacetoacetate hydrolase (Fragment) OS=Dimocarpus longan PE=2 SV=1**

**Accession: tr|G0YC94|G0YC94\_9ROSI**

**Unused ProtScore: 5.79**

**Seq Cov %: 22.9**

**ITRAQ Changed Ratio:**

**117: 115=E3TL: D3TL=1.61**

**116: 114=E5TL: D5TL=3.14**

**Annotated typical Precursor MS Region:**

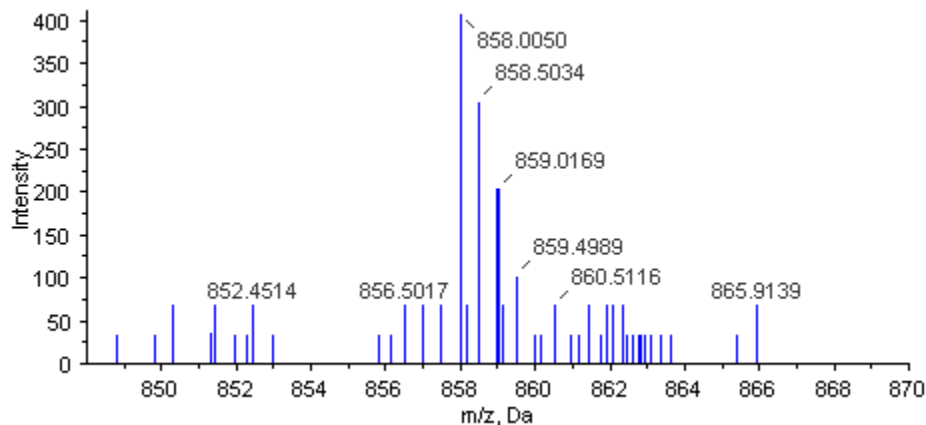

**Sequence Coverage and Matched peptides: in different color**

MAVLQSFVEVKPDSHFPIQNLPGVFKPDPTSSPRPGIAIGDYVLDLSEIAKAGLFGPTLS**GSDCFLQ**  
**PNLNK**FLALGRPAWKEARATLQK**LLSSSEAAALRDNASLR**QKSLVSMQKVMVVPVIAIGDYTDFFSSMH  
AK**NCGTIFR**GPQNPVPANWFHLPVIAIHGR**ASSIVISGTDIVRPR**GQGVPSGNSPPFPGPSQK**LDFELEM**  
**AAVVGPGNELGK**PVDVNEAADHIFGVVLMNDWSAR**DIQAWYVPLGPF**LGK**SFGTTIS**PWIVTL

# Protein No.: I-408

**Protein name and Species:**

**Protease inhibitor HPI OS=Hevea brasiliensis GN=PI1 PE=1**

**SV=2**

**Accession: sp|Q6XNP7|HPI\_HEVBR**

**Unused ProtScore: 5.72**

**Seq Cov %: 65.7**

**ITRAQ Changed Ratio:**

**117: 115=E3TL: D3TL=1.51**

**116: 114=E5TL: D5TL=1.34**

**Annotated typical Precursor MS Region:**

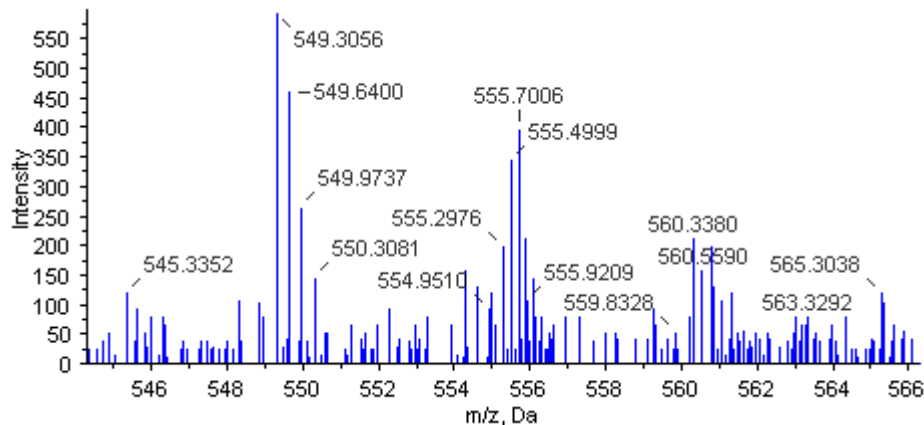

**Sequence Coverage and Matched peptides: in different color**

MASQCPVKNSWPELVGTNGDIAAGIIQTENANVKAIVVKEGLPITQDLNFNRRVRFVDENRVVTQVPALG

## Protein No.: I-409

**Protein name and Species:**

**1-phosphatidylinositol-4,5-bisphosphate phosphodiesterase,  
putative OS=Ricinus communis GN=RCOM\_0339640 PE=4  
SV=1**

**Accession:** [tr|B9T5Y1|B9T5Y1\\_RICCO](#)

**Unused ProtScore:** 5.7

**Seq Cov %:** 13.6

**ITRAQ Changed Ratio:**

**117: 115=E3TL: D3TL=0.58**

**116: 114=E5TL: D5TL=0.50**

**Annotated typical Precursor MS Region:**

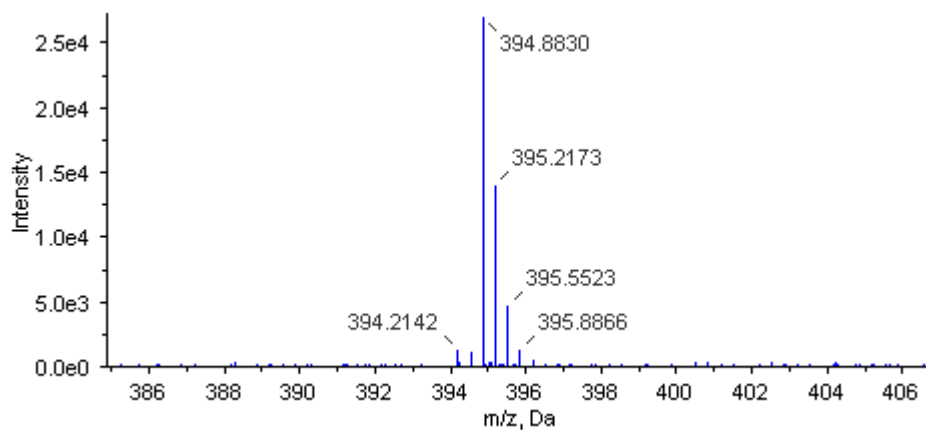

## Sequence Coverage and Matched peptides: in different color

MSKQTYRVCFCFRRRFRRLAVAEAPQEIKSLFDQYSDNNGLMS **IDQLR**RFLVEIQKQDNATTEDAQAIFN  
NLHELKHLNIFHRK **GLNLEAFFKYLFGDINPPLDVK**RGVHHDMTCPLSHYFIYTGHN SYLTGNQLSSDC  
SDVPIIQALQRGVR **VIELDIWPNSTKDNVEVLHGR**TLTTPVELIKCLRSIKEHAFRASDYPVVITLEDH  
LTPDLQAK **VAEMITQTFGDILFTP** **GSECLKEFPSPESLK**KRIIVSTKPPKEYLEVREIREREGDSQSGK  
PGSDEETWGKEIPDLKGFHFRVDDKNELDEDNNDDEDAAPDGNKSQQNIAPEYK **HLIAIHAGKPKGGIE**  
**ECLK**VDPDKVRRRLSLSEQQLEKAAETHGKEIVRFTQRNILR **VYPK**GIRVDSSNYNPLIGWMHGAQMVAF  
NMQGHGRSLWLMQGMFR **ANGGCGYVK** **KPDFLLK**SGPHGEVFDPRAKLPVKTTLVKVKVYMGEGWYDFDR  
THFDAYSPPDFYAR **VGIAGVPADTIMK**KTKTLEDNWIPVWNEEFE **FPLTVPELALLR**VEVHEYDMSEKD  
DFGGQSCLPVSSELKGIIRAIPLHDKGVKYNVSVKLLVRFDFV

## Protein No.: I-410

**Protein name and Species:**

**Protein disulfide isomerase, putative OS=Populus trichocarpa**

**GN=POPTRDRAFT\_643603 PE=3 SV=1**

**Accession: tr|B9GU26|B9GU26\_POPTR**

**Unused ProtScore: 5.68**

**Seq Cov %: 8.9**

**ITRAQ Changed Ratio:**

**117: 115=E3TL: D3TL=2.29**

**116: 114=E5TL: D5TL=2.13**

**Annotated typical Precursor MS Region:**

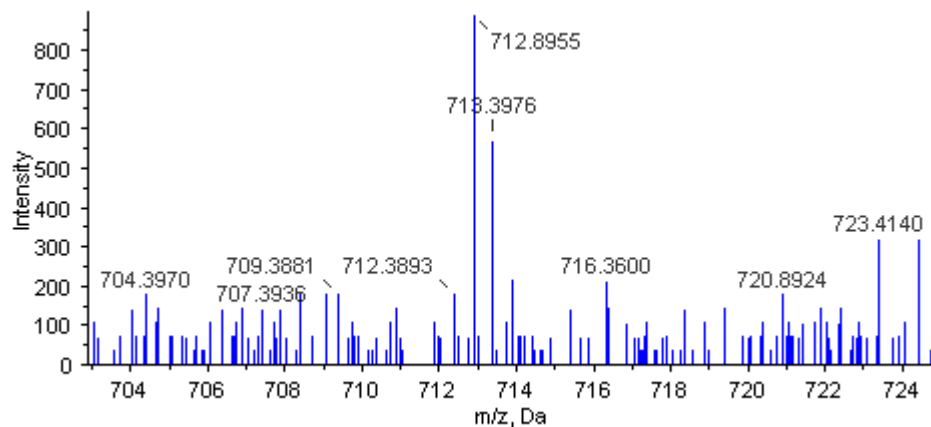

## Sequence Coverage and Matched peptides: in different color

MASTVSWSCIFLLSLIVALSAGEDSKKEYVLTLDHSNFNETVSKHDFIVVEFYAPWCGHCCKKLAP EYE  
KAASILSSNDPQVVLAKVDANEDANKEIASQYDVKGFPTIVILRKGKSVQ EYKGP READGIVEY LK KQ  
SGPASAE LKSDDDATGFIGDKKVVIVGVF PKFSGEEFENFLAVAEKLRSDYEF GHTLDAKYLPRGESSV  
SGPLVRLFKPFDEL FVDSKDFNVDAL EK FVEESSIPIVT LFNK DPSNHP FVVK YFDSPLAKAMLFMNF S  
SENGDSIRTKYQEVAGLHKGDGLVFL LGDVEASQ GALQYFGLKEDQVPLI VIQT TDGQKYLKPNLVSDQ  
IAPWLKEYKEGK VPPFKK SEPIPEVNDEPVKVVVADSLDELVTKSGKNV FLEFYAPWCGHCQKLAPILE  
EVAISFQSDADVVI AKLDATANDIPSDT YDVKGFPTIFFR SATGKLVQYEGDR TKQDIIDFIEK NRDKI  
GQQEPAK EEEPAKEQETAKDEL

## Protein No.: I-412

**Protein name and Species:**

**DEAD-box ATP-dependent RNA helicase 37-like [Vitis vinifera]**

**OS=Vitis vinifera GN=VIT\_08s0007g07070 PE=4 SV=1**

**Accession: tr|F6HLF4|F6HLF4\_VITVI**

**Unused ProtScore: 5.65**

**Seq Cov %: 8.4**

**ITRAQ Changed Ratio:**

**117: 115=E3TL: D3TL=3.16**

**116: 114=E5TL: D5TL=1.61**

**Annotated typical Precursor MS Region:**

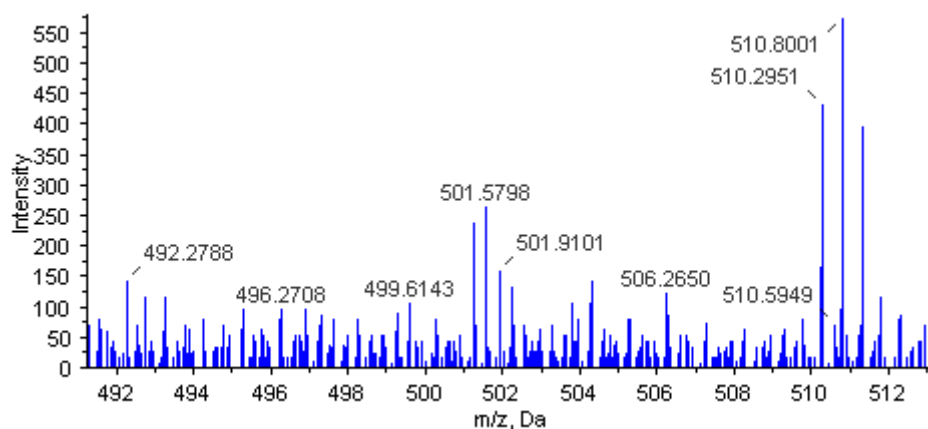



## Sequence Coverage and Matched peptides: in different color

MRTSWADSVANSTSDNLVSGSSDNSGFGAGAPSRSGR**SSYVPPHLR**NRPPSSDPPAPSYTSQ**ASAGYGG**  
**PPGGTR**WGGGSR**ADFGRSGVTTGVTSGGRVGGSSGWNTRSGGWDRGR**DREVNPFGDDDNAEPAFSEQEN  
TGINFDAYEDIPVETSGDNVPPPVNTFAEIDLGEALNQNIIRRCK**YVKPTPVQR**HAIPIISLSGKDLMACA  
QTGSGKTA AFCFPIISGIMTGQFAQRPRGAR**TVYPLALILSPTRELSQIHDEAR**KFSYQTGVKVVVAY  
GGAPINQQLRELERGVDILVATPGR**LVDLLER**ARVSLQMIRYLALDEADR**MLDMGFEPQIR**KIVEQMDM  
PPPGVRQTMLFSATFPKEIQRLASDFLSSYIFLAVGRVGSSTD LIVQRVEFVHESDKRSHLMDLLHAQR  
ANGAHGKQSLTLVFVETKKGADSLEHWLCMNGFPATTIHGDR TQQEREHALRSFK**SGNTPILVATDVAA**  
**RGLDIPVVAHVNFNFDLPNDIDDYVHRIGR**TGRAGK**TGLATAFFNENNSLAR**PLADLMQEANQEVPAWL  
TRYASR**ASYGGGK**NRRSGGGRFGGRDFRKDTSFNRGGGATDYGGNTSSGYGIPGSYGGGYGPGVTSAW  
D

# Protein No.: I-413

**Protein name and Species:**

**Urease accessory protein ureG OS=Morus alba GN=ureG PE=2**

**SV=1**

**Accession: tr|B9A9C9|B9A9C9\_MORAL**

**Unused ProtScore: 5.62**

**Seq Cov %: 15.1**

**ITRAQ Changed Ratio:**

**117: 115=E3TL: D3TL=0.64**

**116: 114=E5TL: D5TL=1.25**

**Annotated typical Precursor MS Region:**

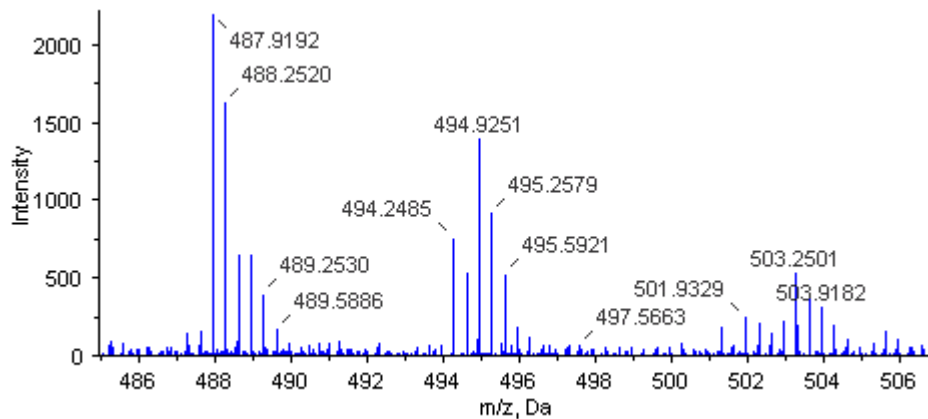

**Sequence Coverage and Matched peptides: in different color**

MASDDHHHHHDHHHHHDHDHDHHDHHSRTGAWVGPDRVYHSHDGLAPHSHEPIYSPGSFSK**RAPPLL**  
**TRDFNERAFTTIGIGGPVGTGKTALMLALCKFLRDKYSLAAVTNDIFTKEDGEFLVKN**GALPEERIR**AVE**  
**TGGCPHAAIR**EDISINLGPLLEELSNL**FKADILLCESGGDNLAANFSR**ELADYIIYIIDV**SAGDK**I**PRKG**  
GPGITQADLLVINK**TDLAPAVGADLAVMER**DALRMR**DGGPFVFAQVK**HGVGIEEIVNHVLQAWAATGK  
KRH

# Protein No.: I-414

Protein name and Species:

Predicted protein OS=Populus trichocarpa

GN=POPTRDRAFT\_580946 PE=4 SV=1

Accession: tr|B9N3J3|B9N3J3\_POPTR

Unused ProtScore: 5.61

Seq Cov %: 7.9

ITRAQ Changed Ratio:

117: 115=E3TL: D3TL=0.41

116: 114=E5TL: D5TL=1.27

Annotated typical Precursor MS Region:

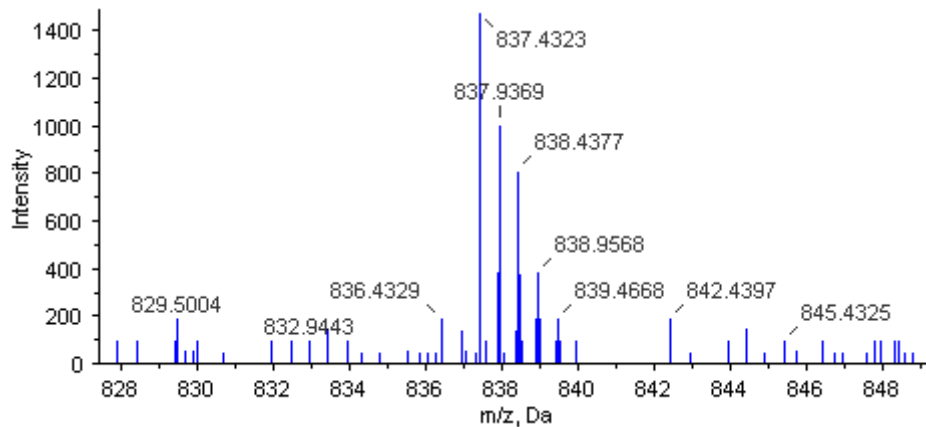

Sequence Coverage and Matched peptides: in different color

MGVDYYNTLKVDKNAKDEDLKKAYRKLAMKWHDPKNPNNKKEAEAKFKQISEAYEVLSDPQKRAIYDQY  
GEEGLKGQVPPPETGGPGGATFFFSTGDGPATFRFNPRNADDIFAEFFGFSSPFGGMGGGGGMRGGSRS  
FGGMFGDDIFSSFGEARPTNPAPRKAPPIENTLPCSLLEELYKGTTKMKISR EIVDVSGLTLPVEEILT  
IDIKPGWKRGTKITTFPEKGNEQPNVIPADLVFVIDEKPHSTFTREGNDLVVTKKIPLVEALTGCTVHLT  
TLDGRTLTIPVNNVIHPNYEEVVAKEGMPIPKDPSTRGNLR IKFDIKFPTRL SAEQKSGIKKLLNS

# Protein No.: I-419

Protein name and Species:

Predicted protein OS=Populus trichocarpa

GN=POPTRDRAFT\_825512 PE=4 SV=1

Accession: [tr|B9IJM2|B9IJM2\\_POPTR](#)

Unused ProtScore: 5.57

Seq Cov %: 11.9

ITRAQ Changed Ratio:

117: 115=E3TL: D3TL=0.41

116: 114=E5TL: D5TL=0.73

Annotated typical Precursor MS Region:

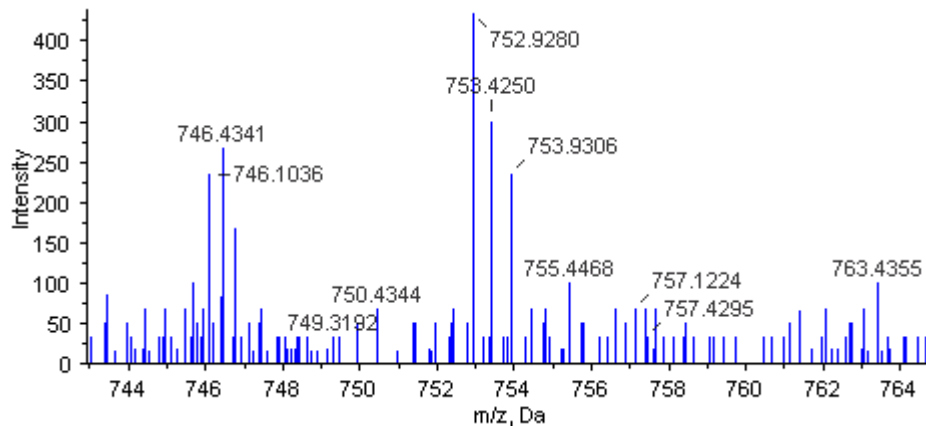

Sequence Coverage and Matched peptides: in different color

MEGAEATRIMMGVNESTIKGYPHASISSR**GAFDWTLQK**I VRSNTSGFKLLFLHVQVPDEDGFDDMDSL  
Y ASPEDFKNMKHRDRTR**GLHLLEYFVNR**CHEIGVACEAWIKKGDPK**EVICHEVK**RVQPDLLVVGSR**GLGP**  
**FQRFVGTIVSEFCQKHA**EC**PVISIK**RA**DETPQDPVDD**

# Protein No.: I-422

**Protein name and Species:**

**Aspartic protease (Fragment) OS=Manihot esculenta PE=2**

**SV=1**

**Accession: tr|Q94KV2|Q94KV2\_MANES**

**Unused ProtScore: 5.53**

**Seq Cov %: 43.4**

**ITRAQ Changed Ratio:**

**117: 115=E3TL: D3TL=0.25**

**116: 114=E5TL: D5TL=0.40**

**Annotated typical Precursor MS Region:**

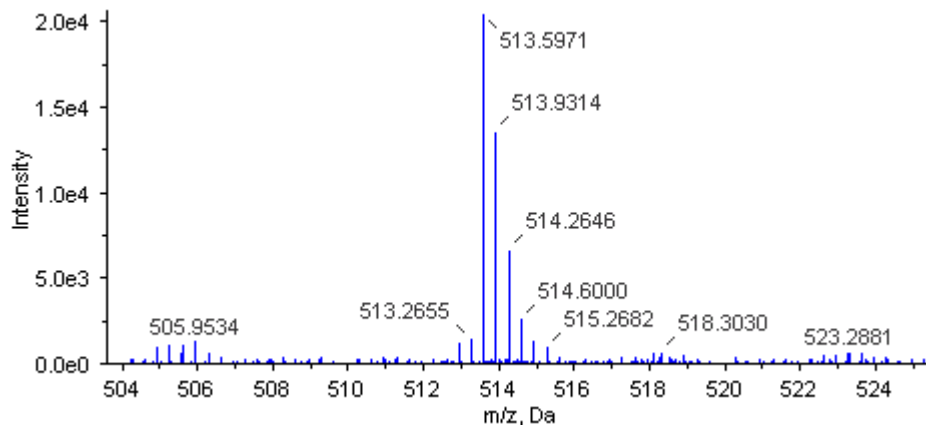

**Sequence Coverage and Matched peptides: in different color**

CTFDGSRGVSMTIESVNVNENSQEVAGSLHDAMCSTCEMAVIWMQNQLKQNTLERILNYANELCERLPS  
PMGESAVDCGSLSTMPNVSF**TIGGK**VFDLSPEQYVLKVGEGEAAQ**CISGFTALD**VPPPRG**PLWILGDVF**  
**MGRFHTVFDYGNLR**VGFAEAA

## Protein No.: I-424

**Protein name and Species:**

**Vacuolar H<sup>+</sup>-ATPase catalytic subunit A; V-type proton ATPase catalytic subunit A-like OS=Populus trichocarpa**

**Accession: tr|B9HV14|B9HV14\_POPTR**

**Unused ProtScore: 5.45**

**Seq Cov %: 43.5**

**ITRAQ Changed Ratio:**

**117: 115=E3TL: D3TL=3.02**

**116: 114=E5TL: D5TL=2.08**

**Annotated typical Precursor MS Region:**

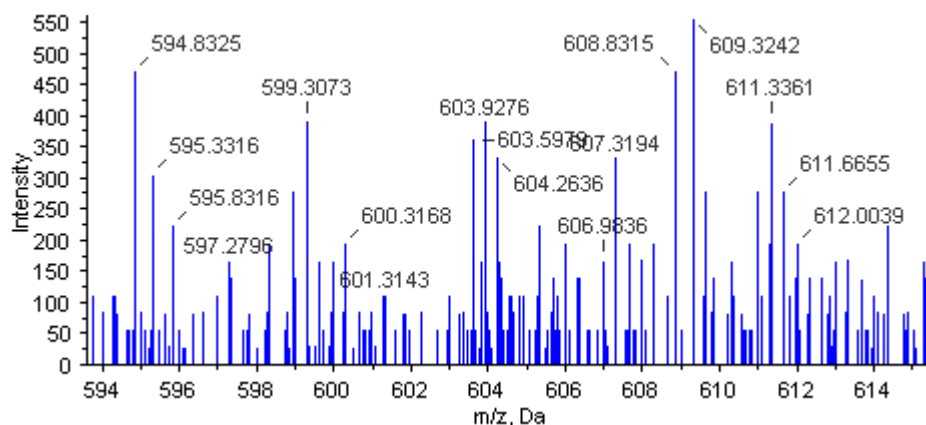

## Sequence Coverage and Matched peptides: in different color

MPSVYGARLTTTFEDSEKESYGYVRKVSQPVVADGMAGAAMYELVRVGHNDNLIGEIIIRLEGHSATIQV  
YEETAGLMVNDPVLRTHKPLSVELGPGILGNIFDGIQRPLKTIARI SGDVYIPRGVSVPALDKDTLWEF  
QPKKIGEGDLVTGGDLYATVFENTLMQHHVALPPDAMGKITFIAPPGQYSLKDTVLELEFQGVKQFTM  
LQTPVRSRPPVASKLAADTPLL TGQRVLDALFPSVLGGTCAIPGAFGCGKTVISQALSKYSNSDTVVY  
VCGGERGNEMA EVLMDFPQLTMTLPDGR EESVMKR TTLVANTSMPVAAR EASITYGTITIAEYFRDMGY  
NVSMMADSTSRWAEALREISGR LAEMPADSGYPAYLAARLASFYERAGKVKCLGSPERTGSVTIVGAVS  
PPGGDFSDPVT SATLSIVQVFWGLDKKLAQRKHFPSVNWLISSYKYSGALESFYERFDPDFINIRTKAR  
EVLQREDDLNEIVQLVGDAL AETDKITLETAKLLR EDYLAQNAFTPYDKFCDFYKSVWMMRNI IHFCN  
LANQAVERGAGMDGQKISYSLIKHRLGDLFYRLVSQKFEDPAEAGEAVLVEKFSKLHEDLTAGFRALEDE  
TR

## Protein No.: I-426

**Protein name and Species:**

**Enolase 2 OS=Hevea brasiliensis GN=ENO2 PE=1 SV=1**

**Accession: sp|Q9LEI9|ENO2\_HEVBR**

**Unused ProtScore: 5.44**

**Seq Cov %: 42.9**

**ITRAQ Changed Ratio:**

**117: 115=E3TL: D3TL=0.41**

**116: 114=E5TL: D5TL=0.52**

**Annotated typical Precursor MS Region:**

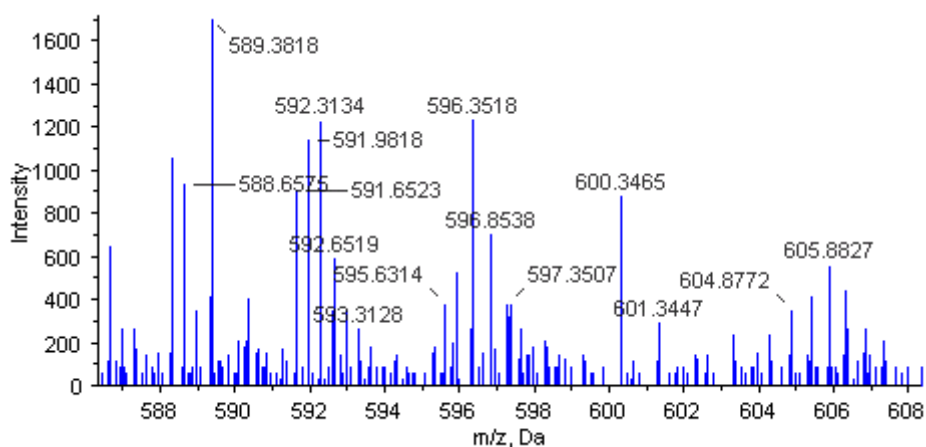



## Sequence Coverage and Matched peptides: in different color

MAITIVSVRARQIFDSRGNPTVEADVKLSDGYLARAAVPRGASTGIYEALELRDGGSDYLKGVSKAVE  
NVNIIIGPALVGKDPDQVGIIDNFMVQQLDGTVNEWGWCKQKLGANAILAVSLAVCKAGAHVKGIPLYK  
HVANLAGNKNLVLVPAFNVINGGSHAGNKLAMQEFMILPVGASSFKEAMKMGAEVYHHLKSVIKKKYG  
QDATNVGDEGGFAPNIQENKEGLELLKTAIAKAGYTGKVVIGMDVAASEFYGSDKTYDLNFKENNNGS  
QKISGDVLLKDLKYSFVTEYPIVSIEDPFDQDDWEHYAKLTSEIGVKVQIVGDDLLVTNPKRVEKAIKEK  
ACNALLKVNQIGSVTESIEAVKMSKRAGWGMASHRSGETEDTFIADLSVGLATGQIKTGAPCRSERL  
AKYNQLLRIEEELGAEAVYAGANFRTPVEPY

## Protein No.: I-429

**Protein name and Species:**

**alpha-galactosidase-like isoform 1 [Glycine max] OS=Glycine  
max PE=2 SV=1**

**Accession: tr|C6TFR0|C6TFR0\_SOYBN**

**Unused ProtScore: 5.42**

**Seq Cov %: 8.3**

**ITRAQ Changed Ratio:**

**117: 115=E3TL: D3TL=0.43**

**116: 114=E5TL: D5TL=0.58**

**Annotated typical Precursor MS Region:**

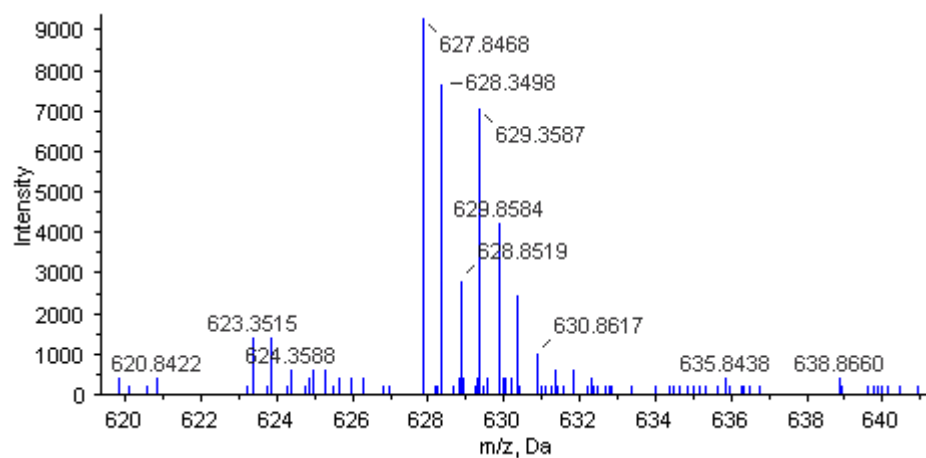

## Sequence Coverage and Matched peptides: in different color

MTKQKIRNALLVHLVILFFFSTSVVSARVVSLQNYGNPIFRSNFH**SIYDTSK**YGVFQLSNGLGKTPQM  
GWNSWNFFACNIN**EMVIK**ETADALVSTGLADLGYVYVNIDDCWSSVTRNLKGQLVPDHKTFPSGIK**ALA**  
**DYVHGK**GLK**LGIYSDAGVFTCQVR**PGSIFHETDDADLFASWGVVDYLK**YDNCYNLGI**PPKERYPPMRDAL  
NATGQKIFYSLCEWGVEDPALWADKVGNSWRRTTGDINDSWASMTTIADLNDKWAAAYAGPGGWNDPDMLE  
VGNGGMTYQEYRAHFSIWALAK**APLLIGCDVR**NLTGETLEILSNKEVIAINQDSLGVQGRKVQVSGADG  
CRQVWAGPLSGNR**LAV**ALWNRCSKVATIT

## Protein No.: I-436

**Protein name and Species:**

**Betaine-aldehyde dehydrogenase OS=Gossypium hirsutum**

**PE=2 SV=1**

**Accession: tr|Q6S9W9|Q6S9W9\_GOSHI**

**Unused ProtScore: 5.37**

**Seq Cov %: 7.2**

**ITRAQ Changed Ratio:**

**117: 115=E3TL: D3TL=0.65**

**116: 114=E5TL: D5TL=1.35**

**Annotated typical Precursor MS Region:**

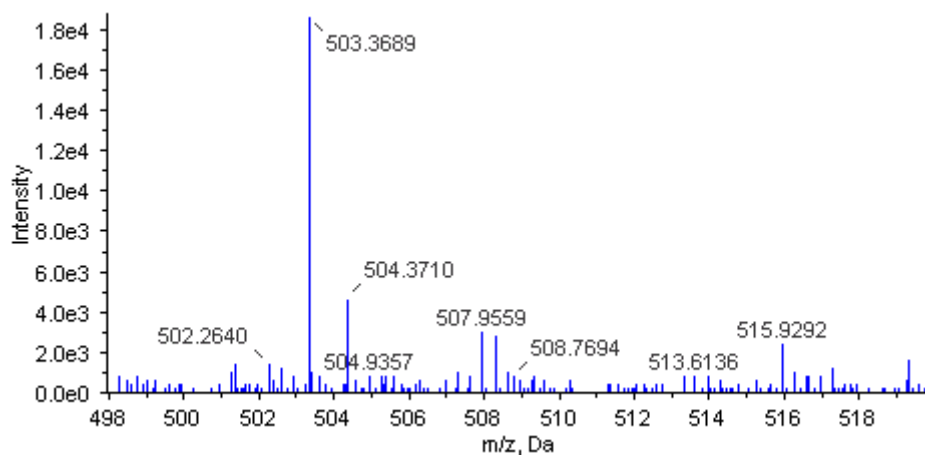

## Sequence Coverage and Matched peptides: in different color

MAVQVPSRQLFIDGEWREPIPKERLPTINPATEEIIIGNIPAATAEDVELAVAAARRALSRNKGKDWATA  
PGAVRAKYLRAIAAKVTERKTELAKLEAIDCGKPLDEAVWDIEDVAGCFEYYADLAEGLDARQKAPVSL  
PMETFKSYVLKEPIGVVGLITPWNYPILLMATWKVAPSLAAGCAAILKPSELASITCLELAKVVKGSRLP  
PGVLNLAGLGPEAGAPLASHPDVDKIAFTGSSATGSKIMAAAAQMVKPVSLLELGGKSPIIVFEDVDLD  
KAAEWTAFGCFWTNGQICSATSRLIVHENIAREFLDRLVKWTKNIKISDPFEEGCRLGPVVS GGQYEV  
LKFISTAKSEGATILSGGVRPEHLKKGFFVEPTIITDVTSMQIWR EEVFGPVL CVK TFRTEEEALELA  
NDTHYGLGAAVISNDLERCDRVSKNLQAGIVVWNCSPFCFCQAPWGGNKRSGFGRELGEWGLDNYLSVK  
QVTQYVSDEPWGWYRSPSKL

## Protein No.: I-437

**Protein name and Species:**

**2-hydroxyphytanoyl-CoA lyase, putative OS=Ricinus communis**

**GN=RCOM\_0466960 PE=3 SV=1**

**Accession: tr|B9SPZ1|B9SPZ1\_RICCO**

**Unused ProtScore: 5.35**

**Seq Cov %: 12.4**

**ITRAQ Changed Ratio:**

**117: 115=E3TL: D3TL=0.45**

**116: 114=E5TL: D5TL=0.61**

**Annotated typical Precursor MS Region:**

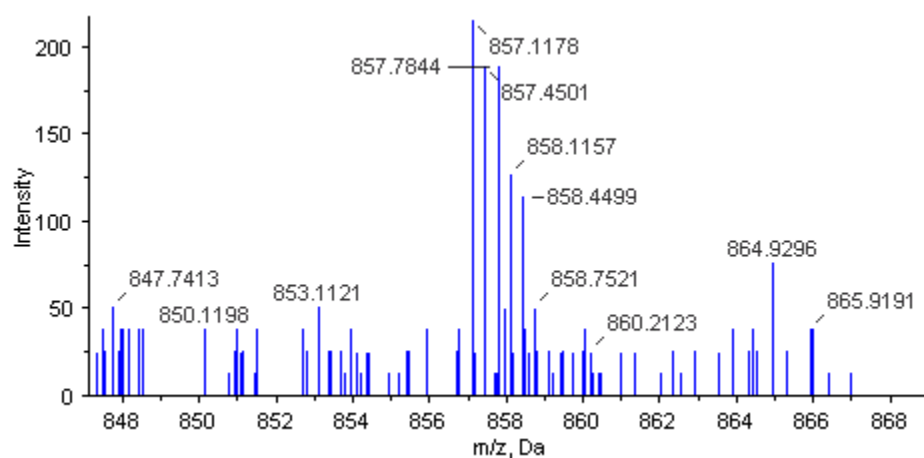

## Sequence Coverage and Matched peptides: in different color

MADSNPQNAPESRIDGNILAAKSLARYGVTHMFGVVGIPVTSANR**AVSLGIR**FVAFHNEQSAGYAASA  
YGYLTGKPGLLLTVSGPGCVHGLAGLSNAMVNTWPMVMISGSCDQNDVGKGFQELDQIEAVKPFVKFS  
VKVKDIK**EIPNCVFQVLDR**AVSGRPGGCYLDIPSDVLHQTVDESEAESLLS**DAFK**PKSIVNEFNTKSSD  
FERAAELLRTAER**PLIVFGK**GAAAYARAESELKKLVELTGIPFLPTPMGKGILPDNHELAASAARSLAIG  
K**CDVALVVGAR**LNWLLHFGQPPKWSKDVKFILVDVCEDEIELRKPFLGL**VGDAKKVLEIINKEIKDDPF**  
**CLAK**NHPWVEAISSKVKENVSR**MESQLAKNVVPENFLTPMR**IIR**DAILGVGSPAPIVVSEGANTMDVGR**  
AVLVQTEPRTRLDAGTWGTMGVGLGYCIAAAVAEPNRLVVAVEGDSGFGFSAMEVETLVRYKLPVVIV  
FNNGGV**YGGDRR****SPEELIAGPFK**DDPAPTSFVPGAAYHILIK**AFGGK**GYLVA TPDELK**SALSESFSAREP**  
**TVINVTIDPYAGAESGR**LQHK

## Protein No.: I-439

**Protein name and Species:**

**Calcium-dependent protein kinase 5; CDPK OS=Arabidopsis  
thaliana GN=CPK5 PE=1 SV=1**

**Accession: sp|Q38871|CDPK5\_ARATH**

**Unused ProtScore: 5.34**

**Seq Cov %: 9.4**

**ITRAQ Changed Ratio:**

**117: 115=E3TL: D3TL=2.58**

**116: 114=E5TL: D5TL=2.14**

**Annotated typical Precursor MS Region:**

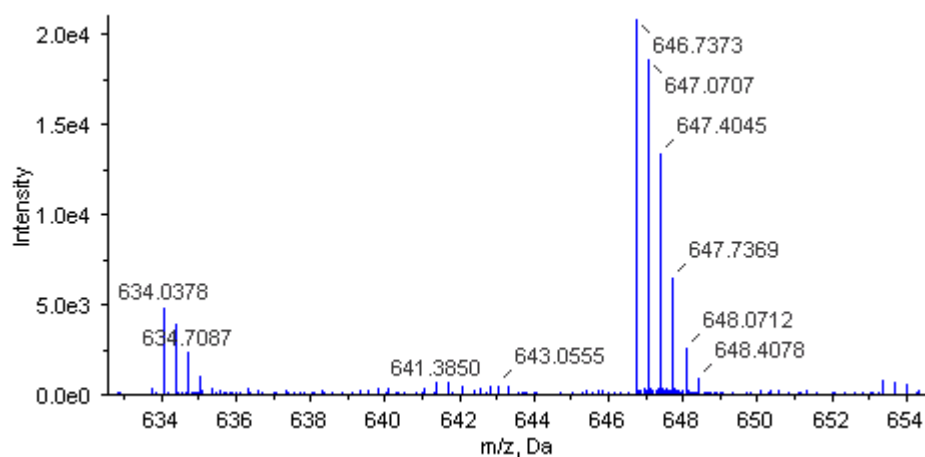



## Sequence Coverage and Matched peptides: in different color

MGNSCRGSFKDKLDEGDNNKPEDYSKTSTTNLSSNSDHSNAADI IAQEF**SKDNNSNNNSK**DPALVIPL  
REPIMRRNPDNQAYYVLGHKTPNIRDIYTL**SRKLGQGQFGTTYLCTE**IASGV**DYACKSISKRKLISKED**  
VEDVRREIQIMHHLAGHGSIVTIK**GAYEDSLYVHIVMELCAGGELFDRI**IQRGHYSERKA**AELTKIIVG**  
**VVEACHSLGVMHRDLK****PENFLLVNKDDDFSLK**AIDFGLSVFFKPGQIFTDVVGSPYYVAPEVLLKRYGP  
EADVWTAGVILYILLSGVPPFWAETQQGIFDAVLKGYIDFESDPWPVISDSAKDLIRRLMLSSKPAERLT  
AHEVLRHPWICENGVAPDRALDPAVLSRLK**QFSAMNK**LKKMALK**VIAESLSEEEIAGLREMFQAMTDN**  
**SGAITFDELK**AGLRKYGSTLKDTEIHDLMDAADVDNSGTIDYSEFIAATIHLNKLEREEHLVAAFQYFD  
KDGSGFITIDELQQACVEHG**MADVFL****LEDLIK**EVDQ**NNDGKIDYGEFVEMMQGNAGVGR**RTMRNSLNIS  
MRDA

## Protein No.: I-441

**Protein name and Species:**

O-linked n-acetylglucosamine transferase, ogt, putative

OS=Ricinus communis GN=RCOM\_1259290 PE=4 SV=1

**Accession:** tr|B9SX16|B9SX16\_RICCO

**Unused ProtScore:** 5.34

**Seq Cov %:** 8

**ITRAQ Changed Ratio:**

**117: 115=E3TL: D3TL=0.10**

**116: 114=E5TL: D5TL=0.39**

**Annotated typical Precursor MS Region:**

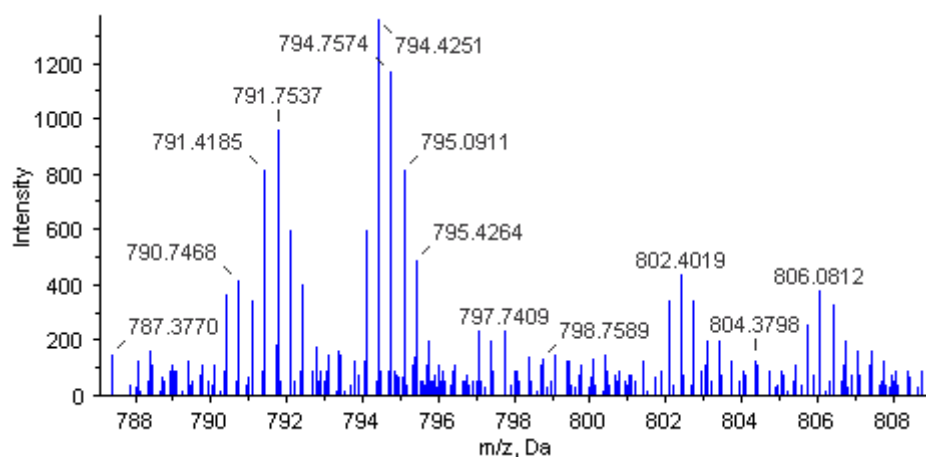

## Sequence Coverage and Matched peptides: in different color

MAWTEKNNNGNGKEGGPIEDNGFLKGTQEPSPSASGSPV**AVAAGLKGIEEK**DSLSY**ANILR**SRNK**FVDAL**  
**AIYESVLEK**DSGNVEAYIGKGI CLQM QNMGR**LAFDSFAEAIK****LDPQNACALTHCGILYK**EEGRIVEAAE  
SYQKALRADPLYKPAAECLSIVLTDLGTSLK**LSGNTQEGIQK**YYEALKIDPHYAPAYYNLGVVYSEMMQ  
YDTALNCYEKAALERPMYAEAYCNMGVIYKNR**GDLESIAICYER**CLAVSPNFEIAKNNMAIALTDLGTK  
VK**LEGDINQGIAYYK**KALYYNWHYADAMYNLGVAYGEMLKFDNAIVFYELAFHFNPHCAEACNNLGVIIY  
KDRDNLDKAVECYQTALS IKPNFSQSLN NLGVVYTVQGM DAAA SMIEK**AIMANPTYAEAYNNLGVLYR**  
DAGNIPMAINAYEQCLKIDPDSRNAGQNRL LAMNYI**NEGHD**EKLFEAHRDWGRRFMRLYPQYTMWDNPK  
DLDRPLVIGYVSPDYFTHSVSYFIEAPLVYHDYANYKVVVYSAVVKADAKTIRFREKVLKQGGIWRDIY  
GIDEKKVASMVREDNVDILVELTGHTANNKLGMMACRPAPIQVTWIGYPNTTGLPTIDYR**ITDSLADPR**  
**DTKQKHVEELVRLPDCFLCYTPSPEAGPVCPTPALANGFITFGSFNNLAKITPKVLQVWARILCAVPNS**  
RLVVKCKPFCCDSVRQRFLTMLEELGLESRLRVDLLPLILLNHDHMQA YSLMDISLDTFPYAGTTTTCES  
LYMGVPCVTMAGAIHAHNVGVSLLSKVGLGHLVAQNEDNYVQLALQLASDIPALSNLRMSLRDLMSKSP  
VCDGSKFTLGLESSYRDMWHRYCKGDVPSLKRME LLKQK GSEAVPNENFEPTRNAFPVEGPPESVKLN  
GYNIVSSSILNRSSEENVSQTLNHTTNSDKPS

# Protein No.: I-447

Protein name and Species:

**Triosephosphate isomerase OS=Vitis vinifera**

**GN=VIT\_13s0019g01090 PE=3 SV=1**

Accession: **tr|D7TLU7|D7TLU7\_VITVI**

Unused ProtScore: **5.22**

Seq Cov %: **16.1**

ITRAQ Changed Ratio:

**117: 115=E3TL: D3TL=0.21**

**116: 114=E5TL: D5TL=0.17**

Annotated typical Precursor MS Region:

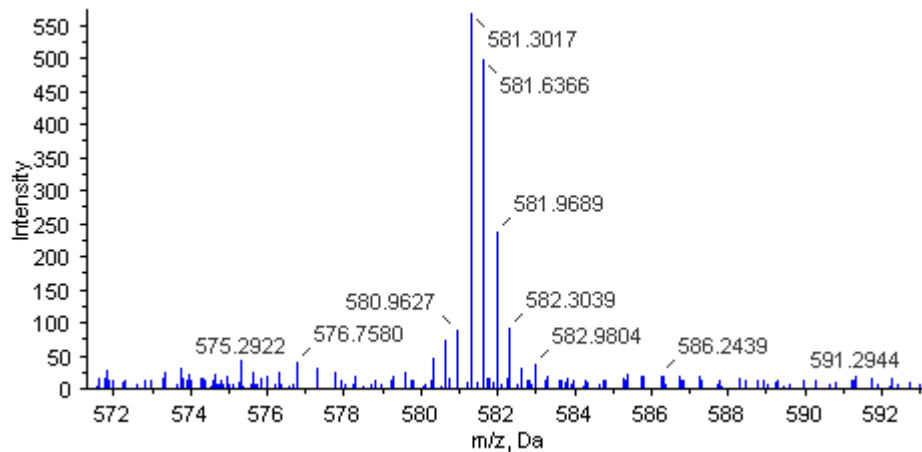

Sequence Coverage and Matched peptides: in **different color**

MGRK**FFVGGNWK**CNGTGEVKKIVSTLNAGEVPSGDVVEVVVSPPFVFLPLVKSTLRPDFHVAAQNCWV  
KKGGAFTGEISAEMLVNLGIPWVVIIGHSEERR**LLLNESNEFVGEKVAYALSKGLKVIACVGETLEQRESG**  
**STMEVVAAQTK**AIADKVSNNWANVVLAYEPVWAIGTGK**VATPAQAQEVHSELR**NWFQANASPEVAATIRI  
IYGGSVSGANCKELAAKPDVDGFLVGGASLKP**EFIDI**IK**SAEVK**KNC

# Protein No.: I-448

**Protein name and Species:**

**Serine-threonine kinase receptor-associated protein, putative**

**OS=Ricinus communis GN=RCOM\_0897280 PE=4 SV=1**

**Accession: tr|B9RUZ3|B9RUZ3\_RICCO**

**Unused ProtScore: 5.22**

**Seq Cov %: 17.3**

**ITRAQ Changed Ratio:**

**117: 115=E3TL: D3TL=9.73**

**116: 114=E5TL: D5TL=2.08**

**Annotated typical Precursor MS Region:**

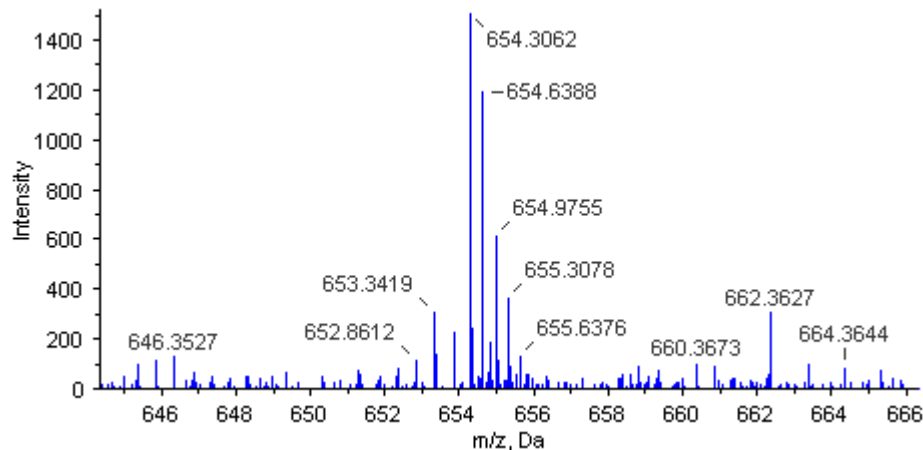

**Sequence Coverage and Matched peptides: in different color**

MDKK**KVAVPLVCHGH**SRPVVDLFYSPVTPDGFLLISASKDSSPMLRNGETGDWIGT**FEGHK**GAVWSCSL  
DTKALR**AASASADFTAK**LWDALTGDELHSFEHRHIVRACAFSEDTHTLLLTTGGMEKILRLFDLNRPDAPP  
REVNSSPGSIRTVAWLHSDQITILSSCTDMGGVRLWDIRSGK**IVQTL**ETK**SPVTS**AEVS**QDGRYIT**TADG****  
**STVK**FWDANHFGLVK**SYNMP**CNVESASLEPK****LGNKFVAGGEDMWIHVFD**FHTGEQIGCNKGHHGPVHCL**  
R**FSPGGESYASG**SEDGTIR****IWQ**TGPQNH**DEN**GPTGK**AMASADDVTQKIKGKGKTAGTDP

## Protein No.: I-449

Protein name and Species:

40S ribosomal protein OS=Populus trichocarpa

GN=POPTRDRAFT\_814470 PE=2 SV=1

Accession: [tr|A9PGL4|A9PGL4\\_POPTR](#)

Unused ProtScore: 5.22

Seq Cov %: 21.7

ITRAQ Changed Ratio:

117: 115=E3TL: D3TL=1.56

116: 114=E5TL: D5TL=1.71

Annotated typical Precursor MS Region:

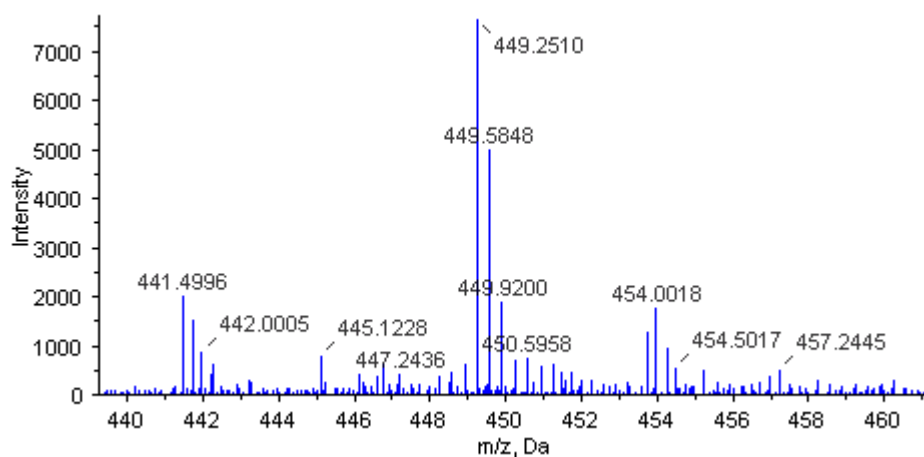

Sequence Coverage and Matched peptides: in different color

MATAKSVK**DVSPHEFVK**AYSAHLKRSGKIELPLWTDIVKTGKFK**ELAPYDPDWYYVR**AASMARK**IYIRG**  
**GLGVGAFR**RIYGGSKRNGSRPPHFCKSSGSIARHILQQQLQNVNIID**IDPK**GGRR**ITSSGQR**DLQVAGR  
IVVAP

## Protein No.: I-453

**Protein name and Species:**

quinone oxidoreductase, putative OS=Populus trichocarpa

GN=POPTRDRAFT\_826614 PE=4 SV=1

**Accession:** tr|B9MU39|B9MU39\_POPTR

**Unused ProtScore:** 5.19

**Seq Cov %:** 20.4

**ITRAQ Changed Ratio:**

**117: 115=E3TL: D3TL=0.38**

**116: 114=E5TL: D5TL=0.53**

**Annotated typical Precursor MS Region:**

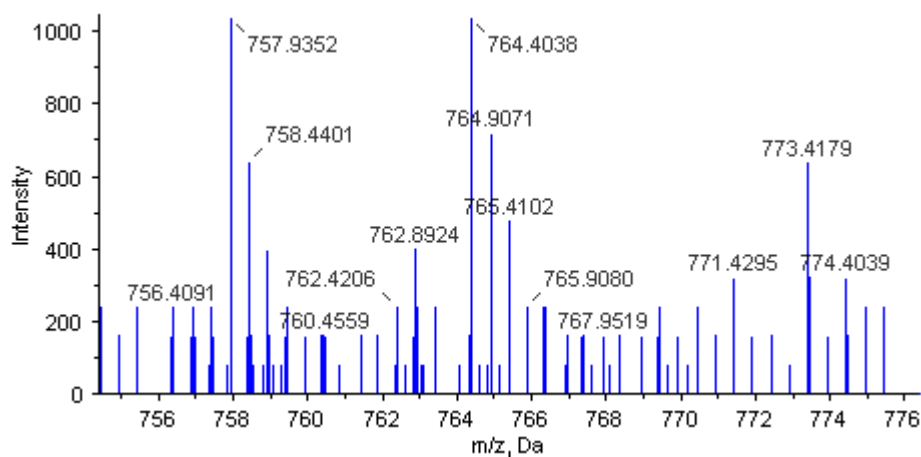

## Sequence Coverage and Matched peptides: in different color

MVKAIR**VHELGGPEVLK**WEDVEIGEPGEGERVKNKAIGLNFIDVYYRKGVYTASTMP**FIPGR**EAVGEV  
IAVGPGLTGRKVGDVVAYAGDPMGSYAEEQILPANKVVSVPESISPVIAASVMLKGMTTQFLLRRCFKV  
EPGHTILVHAAAGGVGSLLCQWANALGATVIGTVSTKEKAAQAKEDGCQHVILYQEE**DFVAR**VNEITSC  
NGVDVVYDSVGK**DTFQGS**L**ACK**TR**GYMVSFGQSSGTPDPVPLSALAPK**SLFLTRPSMMHYNQTRDELL  
GAAGELFSALASGVLRRVR**VNHTYPLSQAAQAHADIESR**KTTGSVVLIP



## Protein No.: I-456

**Protein name and Species:**

**Beta-1,3-glucanase OS=Hevea brasiliensis GN=Glu I PE=4 SV=1**

**Accession: tr|Q7XJ83|Q7XJ83\_HEVBR**

**Unused ProtScore: 5.16**

**Seq Cov %: 59.1**

**ITRAQ Changed Ratio:**

**117: 115=E3TL: D3TL=0.13**

**116: 114=E5TL: D5TL=0.65**

**Annotated typical Precursor MS Region:**

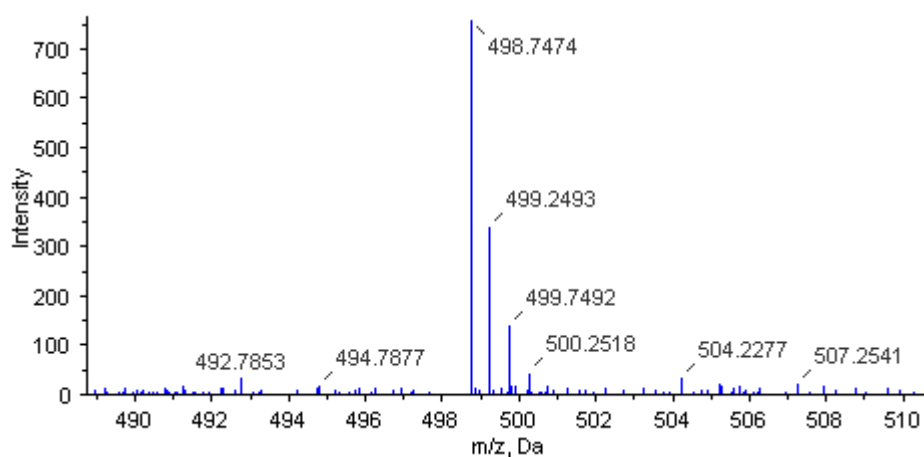

## Sequence Coverage and Matched peptides: in different color

MAISSSTSGTSSSLPSRTTVMLLLIFFTASLGITDAQVGVICYGMQGNLPPVSEVIALYKQSNIKRMR  
YDPNRAVLEALRGSNIELILGVPNSDLQSLTNPSNANSWWQKNVRGFWSSVLFRYIAVGNEISPVNGGT  
AWLAQFVLPAMRNIHDAIRSAGLQDQIKVSTAILDLTLVGNSYPPSAGAFRDDVRSYLDPIIGFLSSIRS  
PLLANIYPYFTYAGNPRDISLPYALFTSPSVVWDGQRGYKNLFDATLDALYSALERASGGSLVWVSE  
SGWPSAGAF AATFDNGRTYLSNLIQHVKGGTPKRPNRAIETYL FAMFDENK KQPEVEKHFGLFFPDKRP  
KYNLNFGAEKNWDISTEHNATILFLKSDM

## Protein No.: I-459

**Protein name and Species:**

ATP-citrate synthase beta chain OS=Populus trichocarpa

GN=POPTRDRAFT\_656642 PE=4 SV=1

**Accession:** [tr|B9HIN6|B9HIN6\\_POPTR](#)

**Unused ProtScore:** 5.11

**Seq Cov %:** 38.7

**ITRAQ Changed Ratio:**

**117: 115=E3TL: D3TL=0.47**

**116: 114=E5TL: D5TL=0.54**

**Annotated typical Precursor MS Region:**

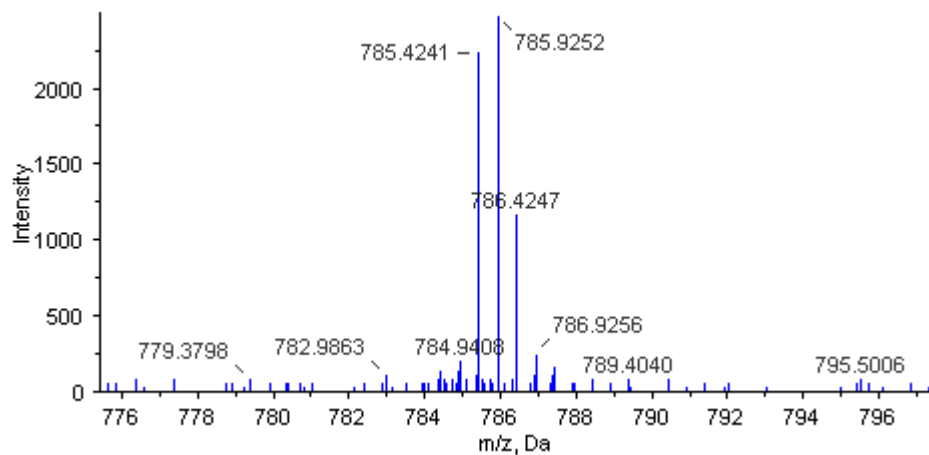

## Sequence Coverage and Matched peptides: in different color

MATGQLFSR**TTQALFYNYKQLPIQRMLDFDFLCGRELPSVAGIINPGAEGFQK**LFFGQEEIAIPVHSTI  
EAACAAHPTADVFINFASFR**SAAASSMSALKQPTVRRVVAIIAEGVPEADAKQLIAYAR**ANNK**VVIGPAT**  
**VGGIQAGAFKIGDTAGTIDNIIACKLYRPGSVGFVSKSGGMSNELYNSIAR**VTDGIYEGIAIGGDVFPG  
STLSDHVLRF**FNNIPQVKMIVVLGELGGRDEYSLVEALKQGK**VSKPVVAWVSGTCAR**LFKSEVQFGHAGA**  
**KSGGEMESAQAK**NQALK**DAGAVVPTS YEAFETAIK****ETFEK**LVEEGK**ISSVK**EFTPPQIPEDLN**IAIK**SG  
KVR**APTHIISTISDDR****GEEPCYAGVPM**SSIVEQGYGVDVISLLWFKRSLPRYCTHFIEICIMLCADHG  
PCVSGAHNTIVTARAGK**DLVSSLVSGLLTIGPRFGGAIDDAAR**YFKDAYDR**GLTPYEFVESMK**KKGIRV  
PGIGHRIKRGDNRDK**RVELLQLFAR****THFPSVK**YMEYAVQVETY**TLSK**ANNLVLNVDGAIGSLFLDLLAG  
SGMFTKQEIDEIV**GIGYLNGLFVLARSIGLIGHTFDQK****RLKQPLYR**HPWEDVLYSK

## Protein No.: I-467

**Protein name and Species:**

**COP9 signalosome complex subunit 1 [Vitis vinifera] OS=Vitis  
vinifera GN=VIT\_15s0048g01980 PE=4 SV=1**

**Accession: [tr|D7U7I9|D7U7I9\\_VITVI](#)**

**Unused ProtScore: 4.99**

**Seq Cov %: 7.7**

**ITRAQ Changed Ratio:**

**117: 115=E3TL: D3TL=1.59**

**116: 114=E5TL: D5TL=1.10**

**Annotated typical Precursor MS Region:**

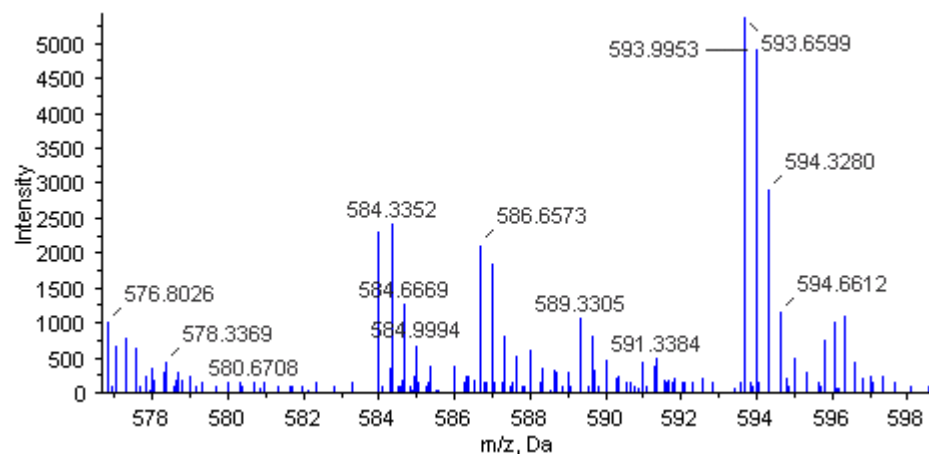

## Sequence Coverage and Matched peptides: in different color

MEGEEESSAGAMIDEIYSNGGDAKRNRP IISGEALDIEAYASLYSGRTKITRLLFIADR CENRQMOMEA  
YR MAYDEIKK GENTQLYREVVQKIDGRLGPQYGLDLVWTESVERRADQRKEK LENELNAYR TNLIKESI  
RMGYNDFGDFYYAHGLLADAFKNYVRTRDYCTTSKHI IHMCLNAILVSIEMGQFTHVTSYVSKAEQTPE  
ALDPVTVAKLRC AAGLAHLEAK KYKLAARKFLETGAELGNNYTEVIAPQDVATYGGLCALASFDRTELK  
NKVIDNLFNRNFLELVPEVRELIHDFYSSHYASCLDYLGNLKTNNLLLDIHLHDHVEMLYNQIRHKALIQ  
YTHPFVSVDLRMMANAFKTSVAGLEK ELEALITDNQIQAR IDSHNK ILYAR HADQRNATFQVRLQTGNE  
FDRDVRAMLLRANLLKHEYNLRASRKP

## Protein No.: I-475

**Protein name and Species:**

**Amidase, putative OS=Ricinus communis GN=RCOM\_1431340**

**PE=4 SV=1**

**Accession: tr|B9RF45|B9RF45\_RICCO**

**Unused ProtScore: 4.89**

**Seq Cov %: 5.6**

**ITRAQ Changed Ratio:**

**117: 115=E3TL: D3TL=0.60**

**116: 114=E5TL: D5TL=0.64**

**Annotated typical Precursor MS Region:**

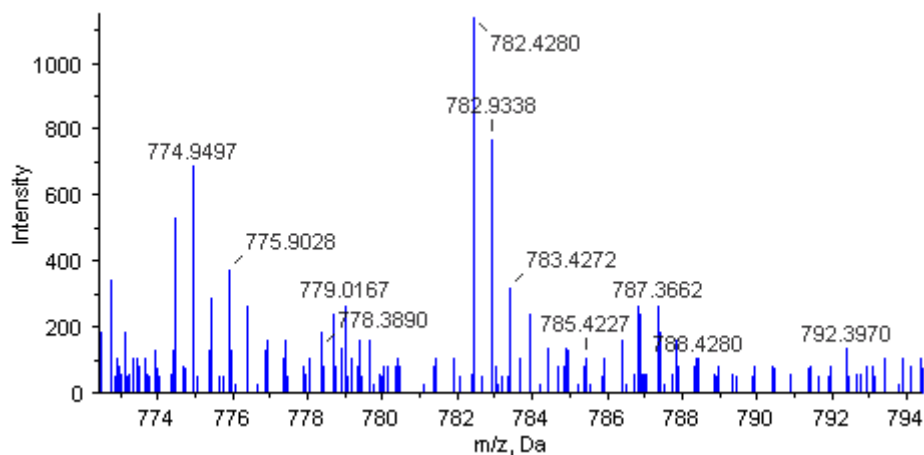

## Sequence Coverage and Matched peptides: in different color

MTHQFYELAITLCCSVLSDSNQSPACQWIKGWPTENDQIVLWKIGRPAKAACQIDRESWDRAQSLTVRA  
VTDMAISPDYGAFMEKFVLKPSSSSDQLPLHSLTFAVKDIFDVDGYVTGFGNPDWARTHSAATATAPAV  
LAVLRGGATCVGKVMIDEMAYSINGENAHYGTPTNPSAPDRVPGSSSSGSAAVAVGAKLVDFSLGSDTGG  
SVRVPASYCGILGFRPSHGVSVSGVIPMAQSFDTVGWFSRNPVILKHVGRLLLQLPDVDRTPNQIFI  
AEDCFQLSSIPKKRVSQVLVKSVEKLFGGDIVKHVNLGDYVEDKVPSLRHFMSKEIKEQEYNIAPLAAL  
SSAMRMLQRYEFKTNHGEWVTTVKPDFGPGPKERIWEAVRSTEENIDAFQSVRTELRAALTNLLEEFI  
IAIPTVPGVPPKLNTPPTLEIFRAKAFSLLSITGVSFGCQVSIPLGMHDGLPVSISLLAKHGSDVFL  
NVVETLYDTLQEEVCNI



## Protein No.: I-478

**Protein name and Species:**

**Ligatin, putative OS=Ricinus communis GN=RCOM\_1045170**

**PE=4 SV=1**

**Accession: tr|B9SBV7|B9SBV7\_RICCO**

**Unused ProtScore: 4.86**

**Seq Cov %: 5.2**

**ITRAQ Changed Ratio:**

**117: 115=E3TL: D3TL=0.52**

**116: 114=E5TL: D5TL=1.06**

**Annotated typical Precursor MS Region:**

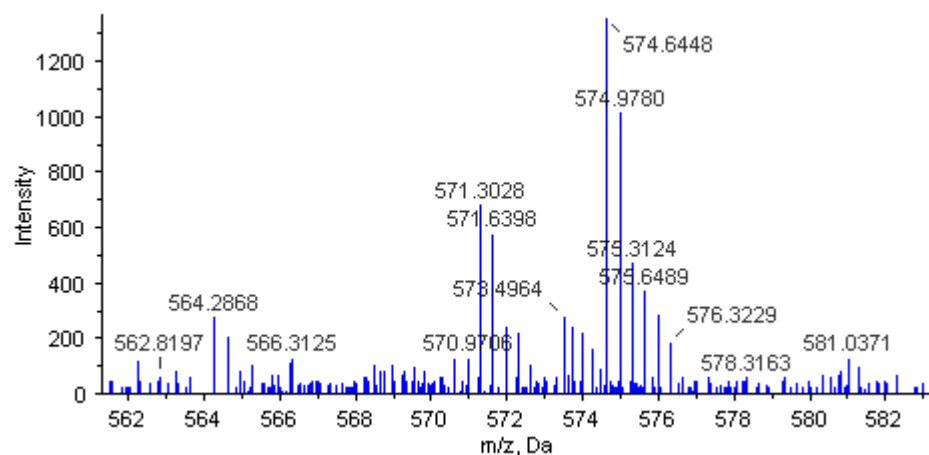

## Sequence Coverage and Matched peptides: in different color

MFKKAVEAKSHQRLSGADRKKLKR SIRDKFPRASDADIDTLLPPKADITVAKFQNRVHVYGVVEGGFPMF  
FDVDGRGTDIFPTVFALWNVPEFLPSFMLKGGEVSRYLGGADLMFPGISIPAEGLPFSFASAGEPWAVKV  
PGNPAPIAVGSTTMSSEAIKAGLRGKALRITHYYRDLLWESVEGHYVPNAGFFEDVVFEDPAFTSSIQ  
VSDSYETAYDVSNDQLNKVETDEIGESADVNDVISESHPSTITELDSKESKHDIIEQVTAVVSDMKVMD  
NDTADESTIEEQHILSTGDVDAYLDKCLLQALHTTVKDKDLPMPGSTLWSNHVLP CRPPGVLLDIKKSS  
HKKLSKWLQAKSSAGLISVKEDKYKKETVLI SINRSHPDYLSFKPEKRQEQKIDQAGDR**ATSESQSK**KM  
LEVAEIYKPSVHVNP I FASVGADTGKLYTASEASDIVFN Y IEKENLVKPTNKS FVVL DATLCDALFKGT  
VKK**GSTYPTEIHK**KDLGS**IFISRMQAHYIVTR**GSDSAIRKGLKTIQ**ILTER**RQGNKKVTKVSGLEQFL  
MDAEALASELQKK**FACSTSVQELPGK**K**GNEVLIQGGVIDDVARHLVEQYGVPKRYIEVLDK**TKK

# Protein No.: I-481

**Protein name and Species:**

**Steroid dehydrogenase, putative OS=Ricinus communis**

**GN=RCOM\_1082860 PE=3 SV=1**

**Accession: tr|B9RMR2|B9RMR2\_RICCO**

**Unused ProtScore: 4.82**

**Seq Cov %: 5.9**

**ITRAQ Changed Ratio:**

**117: 115=E3TL: D3TL=3.40**

**116: 114=E5TL: D5TL=1.38**

**Annotated typical Precursor MS Region:**

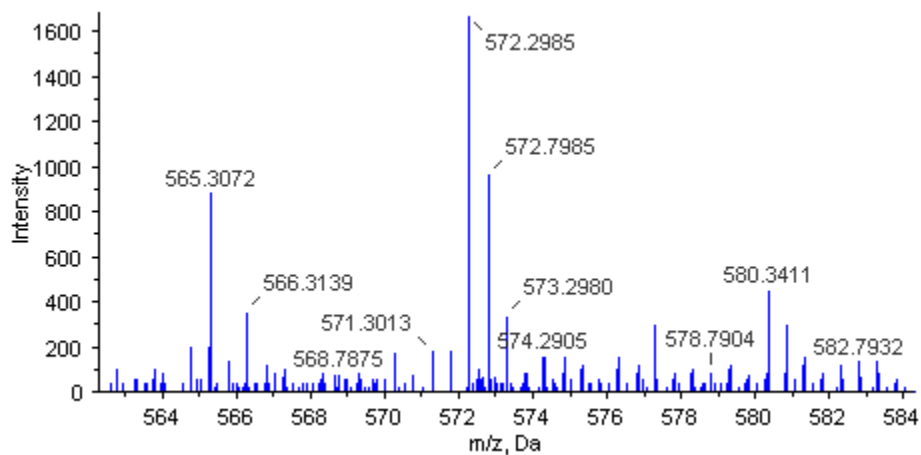

**Sequence Coverage and Matched peptides: in different color**

MELCFVDK LKSQPLWFLVLFSLGSL SLLRCFF TILNWVYVNF LRPKNLKKYGSWALVTGPTDGIGKGF  
AFQLARKGLN LVLVAR NPDKLKDVS DSILSKYGKVQIK TVVVD FSGDIDEGVKRIKDTVEGLDVGVLIN  
NVGVSYPYAR FHEVDEELLK NLIKVNVEGT TTKVTHAVLP GMLKR KKGAIINIGSGAAIVIPSDPLYAV  
YAATK AYIDQFSR CLYVEYK KSGIDVQCQV PLYVATK MASIRRSSFVPSTDDYARAGLRWVG YEP RCT  
PYWPHSLIWGLISIVPEFAVDAWRYKFN LGIRKRGQQKDARKKE

## Protein No.: I-482

**Protein name and Species:**

**Importin alpha-2 subunit, putative OS=Ricinus communis**

**GN=RCOM\_0819430 PE=4 SV=1**

**Accession: tr|B9SGQ4|B9SGQ4\_RICCO**

**Unused ProtScore: 4.81**

**Seq Cov %: 11.6**

**ITRAQ Changed Ratio:**

**117: 115=E3TL: D3TL=0.61**

**116: 114=E5TL: D5TL=0.56**

**Annotated typical Precursor MS Region:**

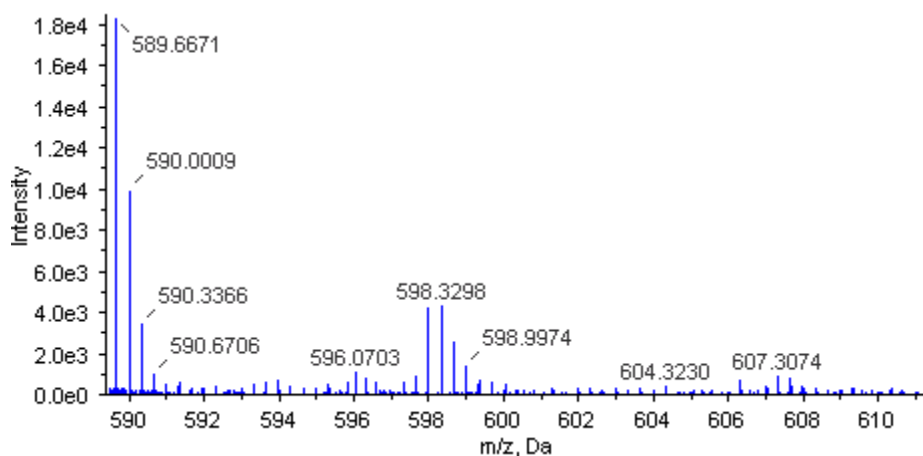

## Sequence Coverage and Matched peptides: in different color

MAEEGLTSLKREPIKSSVGNVAAQKRK**QNAVAVGKER**RESLVRAKRLCRVGTSGDSDSEMIIDEEQSIL  
DAQTSSAVEELKSAVAFQGGAMQKKVGALRELRRLLSRSEFPPIEAAIKAGAIILLVQCLSFSGPDEQ  
LLEAAWCLTNIAAGKPEETKALLPALPLLIAHLGERSSSPVAEQCAWALGNVAGEGEDLR**NVLLSQGAL**  
**PPLAR**MMLPNRGSTV**TAAWALS**NLIK**GPDPKAA**TELIRVDGVLDIVRHLRKADEELATEVAWAVVYL  
SALSNVATSMVLKSDVLQLLIQ**RLATS**NSL**QLLIP**VLRSLGNLIAGDSHTISAVLLPGIEITDSIIAVL  
VKCLKSEHRVLKKEAAWVLSNIAAGSVEHKQLIYCSEAVPLLLR**LLSTAP**F**DLR****KEVAY**VLGNLCVAPA  
**EGTGK**PDLILEHLVSLVSRGCLPGFIDLVRSDTEAARLGLQFIELVLRGMPNGEGPKLVEQENGEAM  
ER**FQFHENE**DLRNMANGLVDRYFGEDYGLTELTD

## Protein No.: I-485

**Protein name and Species:**

**Adenylyl cyclase-associated protein OS=Populus trichocarpa**

**GN=POPTRDRAFT\_722043 PE=3 SV=1**

**Accession: tr|B9HRN7|B9HRN7\_POPTR**

**Unused ProtScore: 4.79**

**Seq Cov %: 8.8**

**ITRAQ Changed Ratio:**

**117: 115=E3TL: D3TL=0.58**

**116: 114=E5TL: D5TL=0.72**

**Annotated typical Precursor MS Region:**

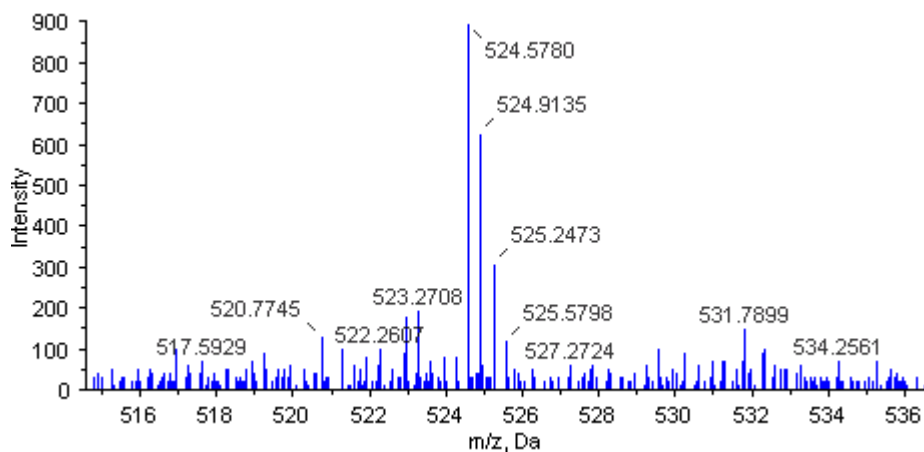

## Sequence Coverage and Matched peptides: in different color

MEEKLIER**LESAVAR**LEALSLRSGGLALSGGDDSAATDPSIVAFDDFIGTFFVRVSSAAEKIGGQVLEV  
TRILEQALNVQKELLIKIKQTRKPDLAGLAEFLKPL**NEVIMKANAMTEGRRS**DFFNHLKAAADSLTALA  
WIAYTGKDCGMSMPIAHVEESWQMAEFYSNK**ILVQYK**SKDPNHVEWAKALK**DLYLPGLR**DYVKSHYPLG  
PVWSTTGK**ATASAPSKAPAPPPPPASLF**SSESSQPSSSKPKEGMAAVF**QEISSGK**SVTTGSLKKVTDD  
MKTKNR**ADRTGVVAVTEK**GGRASAPSFASKAGPPK**LELQMR**KWVVENQIGKK**NLVIDDCDAKQSVYVFG**  
**CK**DSVLQIQGK**VNNITIDK**CTKMGVVF<sup>TDVVAACEIVNCTGVEVQCQGSAPTISVDNTGGCQLYLSK</sup>**DS**  
**LGASITTAK**SSEINVLVPGAEPGGDLAEHALPQQFIHAFK**DGQFETTPVSHSGG**

## Protein No.: I-487

**Protein name and Species:**

**Mevalonate kinase, putative OS=Ricinus communis**

**GN=RCOM\_1431350 PE=3 SV=1**

**Accession: tr|B9RF46|B9RF46\_RICCO**

**Unused ProtScore: 4.74**

**Seq Cov %: 10.6**

**ITRAQ Changed Ratio:**

**117: 115=E3TL: D3TL=0.66**

**116: 114=E5TL: D5TL=0.89**

**Annotated typical Precursor MS Region:**

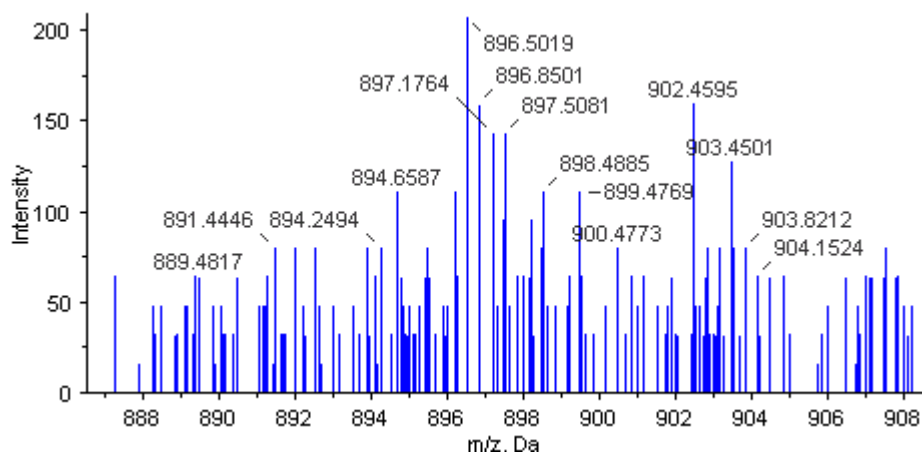



## Sequence Coverage and Matched peptides: in different color

MEVKARAPGKIILSGEHAVVHGSTAVAAAALDLYTYVVISFPSSGNDGTLKLQK**DLALEFSWPVAK**IRE  
ALPNLGVPSSSTPTSCSIESLK**SISALVEEQDIPEAK**IALASGVSAFLWLYTSIQGFEPATVVVTSCLP  
LGSGLGSSAAYCVSLSAALLAFSDSDVDRGHQGWLKFGVDP**LELLNK**WAFEGEKIIHGK**PSGIDNTVS**  
**TYGNMIK**FRSGNLTRMKSNMPLKMLITNTRVGRNTK**ALVAGVSER**TFRHPNAMSFFVNAVDSISNELAN  
IIQSPAPDELSITEKEEMLEELMEMNQGLLQCMGVSHASIE TVLQTTLKYKLASK**LTGAGGGGCVLTL**  
**PTLLSGTVVDK**VIAELESSGFQCLIAGIGGDGAEICFASSS

## Protein No.: I-498

**Protein name and Species:**

**Heat shock protein 90-2 OS=Glycine max PE=2 SV=1**

**Accession: [tr|B6EBD6|B6EBD6\\_SOYBN](#)**

**Unused ProtScore: 4.69**

**Seq Cov %: 30.4**

**ITRAQ Changed Ratio:**

**117: 115=E3TL: D3TL=0.10**

**116: 114=E5TL: D5TL=0.44**

**Annotated typical Precursor MS Region:**

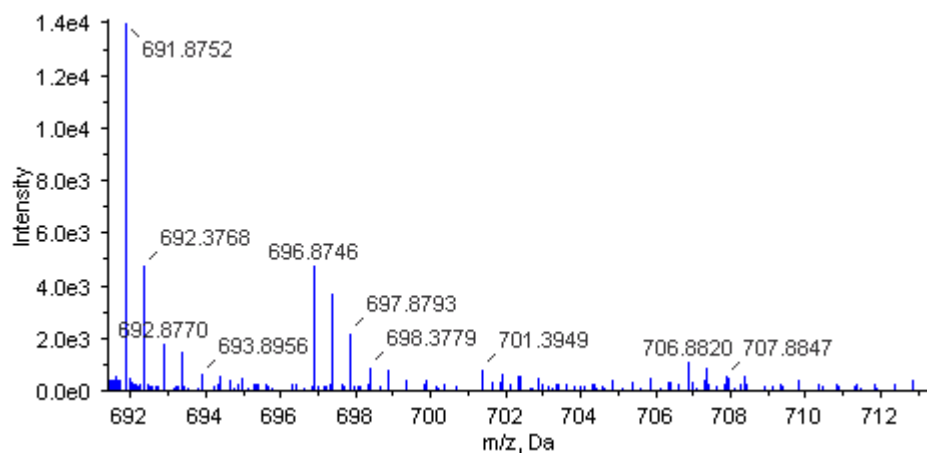

## Sequence Coverage and Matched peptides: in different color

MASETETFAFQAEINQLLSLIINTFYSNK**EIFLR**ELISNASDALDKIR**FESLTDK**SK**LDAQPELFIHI**  
**PDKTNNTLSIIDSGIGMTKADLVNMLGTIAR**SGTKEFMEALAAGADVSMIGQFGVGFYSAYLVADKVIV  
TTKHNDDEQYVWESHAGGSFTVT**RDTSGENLGRGTKITLFLKEDQLEYLEERRLKDLIKKHSEFISYPI**  
**SLWIEK**TTTEKEISSDDEDEEEKKDEEGKVEDVDEDKEKEEKKKKTIK**EVSHEWSLVNK**QKPIWMRKPEEI  
**TKEEYAAFYKSLTNDWEEHLAVK**HFSVEGQLEFKAVL**FIPKRAPFDLFDTK**KKPNNIKLYVRR**VFIMDN**  
**CEELMPEYLSFVKGIVDSEDLPLNISR**EMLQQNKILKVIRKNLVKCCIEM**FFEI**AENKEDYNK**FYEAFS**  
**KNLKLGIHEDSQNKTKLAELLRYHSTKSGDEMTSLKDYVTRMKEGQNDIYYITGESK**KAVENSPFLEKL  
KKKGFEVLY**MVDAID EYAVGQLKEFEGK****LVSATKEGLK**LDESEDEKKK**KEELKEKFEGLCHVIK**DVLG  
**DKVEKVVVSDRVVDS**PCCLVT**GEYGWTANMER**IMKAQALRDSSMAGYMSSK**KTMEINPENPIMEELRKR**  
ADADKNDKSVKDLVLLLLFETALLTSGFSLDDPNTFGNRIHRMLK**LGLSIDEDAGEADAMP**PLEDADAD  
**AEGSK**MEEVD

# Protein No.: I-503

**Protein name and Species:**

**isoflavone reductase related protein OS=Populus trichocarpa**

**PE=2 SV=1**

**Accession: tr|A9PF66|A9PF66\_POPTR**

**Unused ProtScore: 4.65**

**Seq Cov %: 4.9**

**ITRAQ Changed Ratio:**

**117: 115=E3TL: D3TL=0.60**

**116: 114=E5TL: D5TL=0.69**

**Annotated typical Precursor MS Region:**

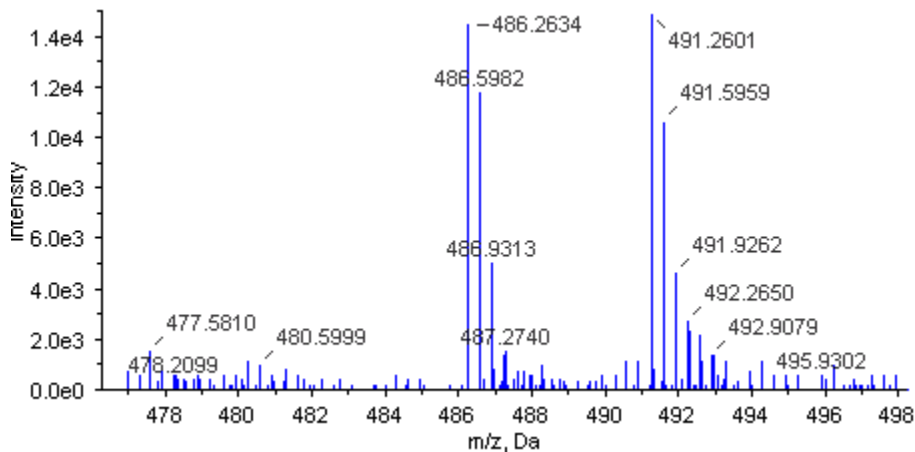

**Sequence Coverage and Matched peptides: in different color**

MASKILFIGGTGYIGKFIVEASAKAGHPTFVLVRESTLSNPAK**SVVIDNFK**NLGVNFLIGDLFDHE**SLV**  
**KA**IK**QVDVVI**STV**GHAQLVEQDR**IIAAIKEAGNVKR**FFPSEFGNDVDRVNAVEPAK**SAFATKANVRRAI  
EAEGIPYTYVSSNFFSGYFLLSFNQPGATAPPRDK**VVILGDGNPKAVFNKEDDIATYTIK**AVDDPRTLN  
KILYIKPPANTISFNDLVSLWEKKIGKTLER**IYVPEEQLLK**NIQEASVPVNVVLSIGHSVFVKGDHTNF  
EIEPSFGVEASELYPDVKYTTVDEYLYKQFV

# Protein No.: I-504

**Protein name and Species:**

**Superoxide dismutase (Fragment) OS=Hevea brasiliensis**

**GN=sod PE=2 SV=1**

**Accession: tr|Q9STB5|Q9STB5\_HEVBR**

**Unused ProtScore: 4.65**

**Seq Cov %: 13.2**

**ITRAQ Changed Ratio:**

**117: 115=E3TL: D3TL=0.44**

**116: 114=E5TL: D5TL=0.57**

**Annotated typical Precursor MS Region:**

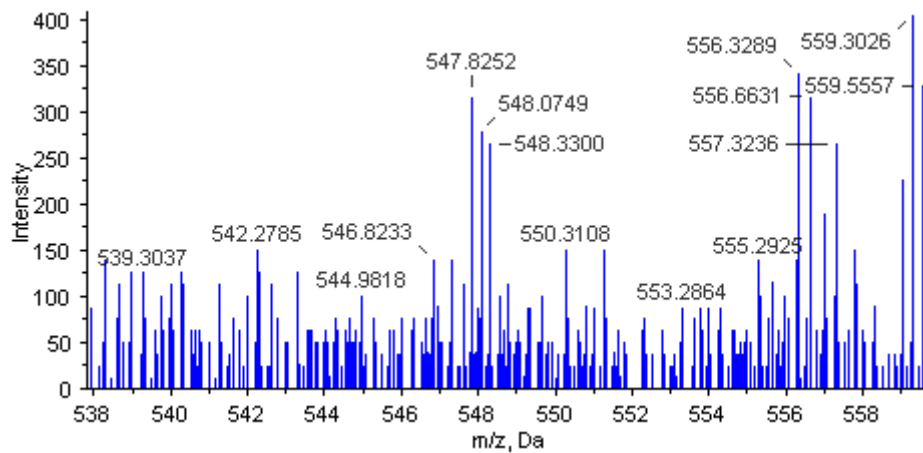

**Sequence Coverage and Matched peptides: in different color**

QTFSLPDLPYDYGALEPAISGEIMQLHHQKHHQTYITNYNK**ALEQLNDAIEK**GDSAADVVKLQSAIKFNG  
GGHVNHSIFWKNLAPVREGGELPHGSLGWAIDADFGSLEKLIQLMNAEGVALQSGGWVWLALDKEL**KK**  
**LVVETTANQDPLVTK**GPPTLVPLLGIDVWEHAYYLQYKNVRPDYLNKNIWKVMNWK**YASEVYAK**ECPSS

## Protein No.: I-506

**Protein name and Species:**

**Cysteine synthase OS=Glycine max PE=2 SV=1**

**Accession: [tr|C6TIP9|C6TIP9\\_SOYBN](#)**

**Unused ProtScore: 4.63**

**Seq Cov %: 16.6**

**ITRAQ Changed Ratio:**

**117: 115=E3TL: D3TL=0.63**

**116: 114=E5TL: D5TL=0.70**

**Annotated typical Precursor MS Region:**

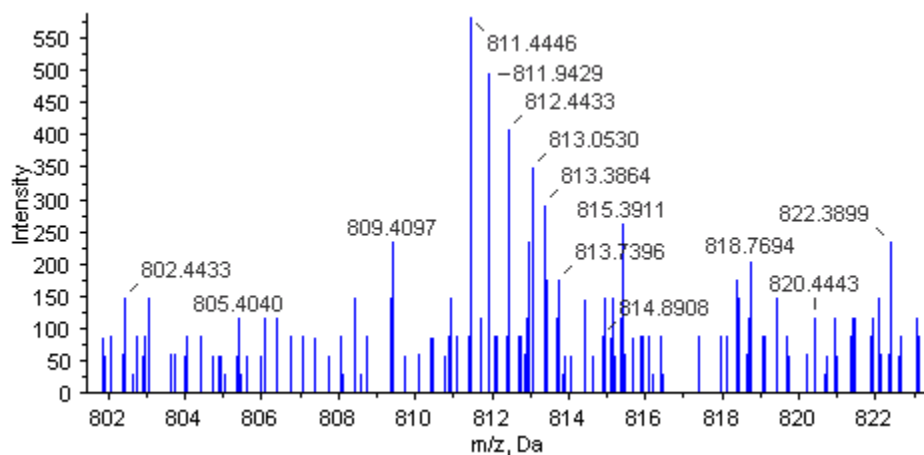

## Sequence Coverage and Matched peptides: in different color

MAAEKSNIAKDVTE~~LI~~IGKTPLVYLNHIVDGCVAKVAAKLE~~ME~~PCSSVKDRIGHSMIVDAEEKGLITPG  
ESVLI~~IE~~PTSGNTGIGLAFMAAAKGYKLIITMPSSMSLERRTILRAFGAELVLTDPAGMKGAVQKAEEI  
RDKTPNSYMLQQFENPTNPKVHYETTGP~~EW~~KGSSGKVDALVSGIGTGGTVTGAGKYLKEQNPDIKLYG  
IEPVESPI~~LS~~GGKPGPHKIQQIGAGFIPGVLDVLLDEVVQISSEEAIE~~TA~~KLLALK~~E~~GLLVGISSGAA  
AAA~~AV~~KIAKRPENAGKLVVAVF~~PS~~FGERYLSSVLFESVKREAESLVFEP

## Protein No.: I-510

**Protein name and Species:**

**Fimbrin, putative OS=Ricinus communis GN=RCOM\_0549750**

**PE=4 SV=1**

**Accession: tr|B9T216|B9T216\_RICCO**

**Unused ProtScore: 4.59**

**Seq Cov %: 15.8**

**ITRAQ Changed Ratio:**

**117: 115=E3TL: D3TL=1.54**

**116: 114=E5TL: D5TL=1.43**

**Annotated typical Precursor MS Region:**

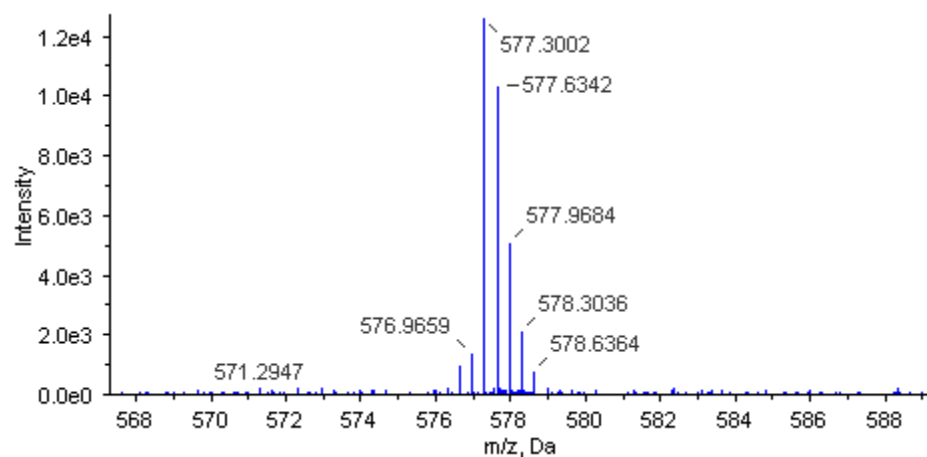



## Sequence Coverage and Matched peptides: in different color

MSAGFVGVLVSDPWLQSQFTQVELRTLKAKYVSIRTEGGR**VTVGDLPVVFVKLR****AFTEVFNEDEIK**AIL  
KESYSKAE EELDFETFLR**AYLNVQAR**VPAKSGGKRLRYSSSFLK**ASTTFRHNINSEK**KASYVSHINNH  
LGEDSFLKTYLPIDPATN**ALFDLVK**HGVLLCK**LINVAVPGTIDER**AINTKKEMNPWER**NENHTLCLNSA**  
**KAIGCTVVNIGTQDLAEAR**PHLVLGLISQI**IKIQLLADLNLK****TPQLVELVDDSK**DVEELMGLPPEKVL  
LKWMNFHLKKAGYN**KEVTNFS****SDVK**DGEAYVYLLNALAPELSTPDTKAASN**PAERAKVLEQA****EK**LDCK  
RYLNANDIVEGSPNLN**LAFVAQIFQHR**NGLSTDITNKMPVAEMMEDDAETSREERC**FRLWINSIGIVTYV**  
NNVFEDVRNGWVLEVL**DKVSPGSVNWK**QATKPP**IKMPFRKVENCNQA**IK**IGKELSFSLVNVAGNDIVQ**  
**GNK**LLLLAFLWQLMR**FTMLQLLR**NLR**SHSSHSQK****EITDADILKWANSK**VKKV**GKTSQMESFK**DKT**LSN**  
GVFFLDLLGAVEPR**VVNWSVVT**KGESDED**KKLNSTYIISVAR****LGCSIFLLPEDIIEVNQK**MMLTTLTAS  
IMFWSLQHAAEPESAAEDNADASSTASMEGENEAALAGEVSDMTMDDAASDSAMSP

## Protein No.: I-511

**Protein name and Species:**

**Folylpolyglutamate synthase OS=Populus trichocarpa**

**GN=FPGS2 PE=4 SV=1**

**Accession: tr|B9HMM6|B9HMM6\_POPTR**

**Unused ProtScore: 4.59**

**Seq Cov %: 5.2**

**ITRAQ Changed Ratio:**

**117: 115=E3TL: D3TL=0.26**

**116: 114=E5TL: D5TL=1.11**

**Annotated typical Precursor MS Region:**

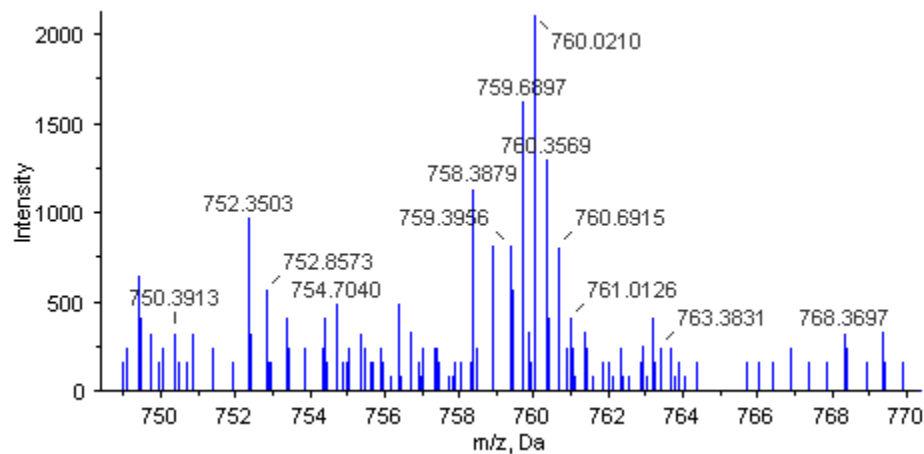

## Sequence Coverage and Matched peptides: in different color

MAEGDNNSSKPTVTPYEEALDALSSLITKRSRADKSNNGDRFDVLFDYLKLEEAISEMKIIHVAGTKG  
K**GSTCTFTESILR**NCGFR**TGLFTSPHLIDVR**ERFRLDGKDICEEKFLAYFWWCYDRLKEKSTEDVPMPT  
YFRFL**ALLAFK**IFS AEQVDVAILEVGLGGKFDATNVVQKPIVCGVASLGYDHMEILGNTLAQIAGEKAG  
IFKDGIPAFTVPPQDEAMNVLEEKASELNVHLQVAEPLDAKLLNGLKLRLEGEHQYLNAGLAIALSF'TW  
LQRTGHHEFTHMEQASSLPEQFIKGLTTASLQGRAQIVTDQYINAESYGDLVIFYLDGAHSPESMEMCAR  
WFLAIAIKEDSQKRTFNYPQNNSESTIELVQEHHDERYGKSSMQILLFNCMSVRDPQLLLPPLMKACAS  
HGVYFKKALFVANTSVYYKVGSHALPPTDSQFNLSWQFALQRVWENLIQSDKGGEVKHAVAVCEEKED  
AKMSGR**TCENSAVFPSLPLAIK**WLKESVQRNRSVHYQVLVTGSLHHLVGDVLRRLVKK

## Protein No.: I-512

**Protein name and Species:**

**Myosin XI, putative OS=Ricinus communis**

**GN=RCOM\_1724180 PE=4 SV=1**

**Accession: tr|B9S596|B9S596\_RICCO**

**Unused ProtScore: 4.58**

**Seq Cov %: 5.5**

**ITRAQ Changed Ratio:**

**117: 115=E3TL: D3TL=1.61**

**116: 114=E5TL: D5TL=1.52**

**Annotated typical Precursor MS Region:**

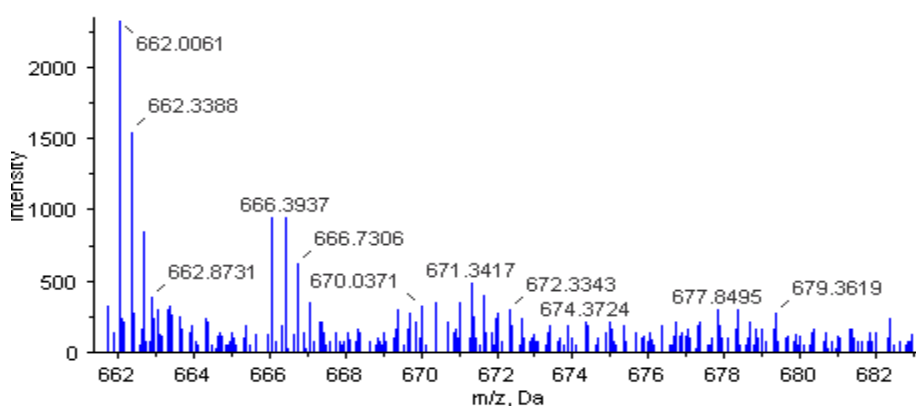

## Sequence Coverage and Matched peptides: in different color

MMKQAAAVTLVVGSLVWLEDPDVAWIDGEVEMKGDNIKVLCTSGKTVVVKASNIYPK**DAEAPPCGVDD**  
**MTKLAYLHEPGVQLQNLRS**RYDMNEIYTYTGNILIAVNPFRKLPPLYDSHMQYK**GAAFGELSPHPF**AV  
ADAAAYRLMINEG**ISQSILVSGESGAGK**TESTKLLMRYLAYMGGRAVAEGR**TVEQQVLESNPVLEAFGNA**  
**K**TVRNNNSSRFGKFVEIQFDQMGRISGAAIRTYLLERSR**VCQVSDPER**NYHCFYMLCAAPQEDVQRYKL  
GNPRTFHYLNQSNCYELDGIDDSKEYIATRR**AMDIVGISSDEQDAIFR**VVAAVLHLGN**IEFAK**GKETDS  
SMPKDEKSRFHLRTAAEELMCDVK**ALED**SLCKR**VIVTR**DETITKWLDPESAVLSRDALAKIVYSR**LFDW**  
**IVDK**INNSIGQDPDSKSLIGVLDIYGFESFKTNSFEQFCINLTNEKLQQHFNQHVFKMEQEEYTKEEID  
WSYIDFVDNQ**DVLDLIEK**KPGGI IALLDEACMFPRSTHETFAQK**LYQTFK**NHKRFSPKPLARSDFITICH  
YAGDVTYQTE**LFLDK**NKDYVVAEHQALLSASTCSFVSGLFPLSAEESKQSKFSSIGSRFKQQQLQSLE  
TLSATEPHYIRCVPNNLLKPAIFENKNILQQLRCCGVMEAIR**ISCAGYPTR**KPFDEFVDRFSILAPEV  
LDGSSDEITACKRLLEK**VGLEGYQIGK**TK**VFLRAGQMADLDTR**RSEVLGR**SASIIQRKVRSYLSRR**SFI  
MLR**RAAIIHQASCRGQLAR**QVYENMLREAASLRIQTYLRMYVARKAYIELYCSAISIQTCMRGMAARDE  
LRFRRRTRAAIVIQSHCRKYLARLHFMELEK**ATITAQCAWRGRVAR**KELRTLKMAARETGALQAAKNKL  
EKQVEELTWRLQLEKMRADLEEAKTQENSKLQSALQEMQLQFKETKEMLVKER**EAAK**TAKEIIPVIQE  
VPVVDNAMLEKLTENEKLIKAMVSSLEKKIDETEKKFEETSKISEERLKQALEAESKIVELKTAMHRLE  
EKFTDMETENQILRQQSLLQTPVKKTSRPPIPAVPNLENGHHVNEEHRASEPQTPVKVFGTESDSKFR  
RSHIERQHENIDALINCMHNIGFSHGKPVAAFTIYKCLLHWKSFEAEKTSVFDRLIQMIGSAIENEDN  
NDHMAYWLSNTSTLLFLLQKSLKAAGAGGATPNKKPSSA**ASLFGR**MAMGFRSSPSSSNLAAALAVVRQV  
EAK**YPALLFK**QQLAAYVEKIYGIIRDNLKKESSLLSLCIQAPRTSKGSALRSGRSFGKDSPPSSHWQSI  
IDSLNILLSTLKQNFVPPVLIQKIYTQTFSYINVQLFNR

# Protein No.: I-514

**Protein name and Species:**

**Cinnamyl alcohol dehydrogenase 1-like [Vitis vinifera]**

**OS=Vitis vinifera GN=VITISV\_025556 PE=3 SV=1**

**Accession: tr|A5C5R6|A5C5R6\_VITVI**

**Unused ProtScore: 4.58**

**Seq Cov %: 4.5**

**ITRAQ Changed Ratio:**

**117: 115=E3TL: D3TL=0.29**

**116: 114=E5TL: D5TL=0.25**

**Annotated typical Precursor MS Region:**

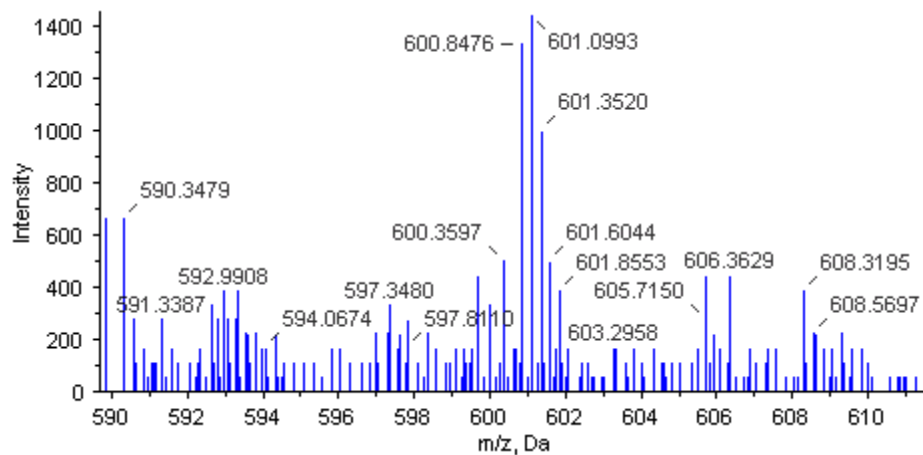

## Sequence Coverage and Matched peptides: in different color

MDSVKEKTHGDTKSKKLAQQRSLQTMSLNWVSCMSKPDMMNNCLGWAARDESGVLSPTYTFTRREVGD  
EDVSLKITHCGICYADMLFTKNRLGDSR**YPLVPGHEIVGIVK****E****VGSNVHHFK**VGHRVGVGAYVNSCREC  
ESCNQSLEVYCSKGSVYTSNGVDADGTITN**GGYSSFIVVHER**YCFRIPDEYPLALAAPLLCPGITAYSP  
MVRHKMNQPGKSLEVIGLGGVGH LAVKFGKAFGLNVKLFSTSIKKEEALSLLGDDNFVSSDEQQMKA  
MANS�DFIIDTASGDHSLDHYMSCLKTAGVLALVGFPGMKTISGSLVGGVKETQEMLDF**CAAHK**IYPDI  
EIVPIQYVNEAWERLTKGDVKYRVVGSDDVSLKITHCGICYADIHTRNKFGNSKYPVVPGHDIVGIVK  
EVGSNVGVFKVGDVGVGTIVNSCRECENCEEGLEIHCSKGPVFTFGGVDVDGTITK**GGYSSFIVVHQR**  
YCYRIADDYPLGLAAPLLCAGITVY**TPMIR**HKMNQPGK**SLGVIGLGLGHMAVK**FGKAFRLNVTVFSTSI  
MSKKEEALTLGADKFVLSDEQDMK**AMAK**SLDFIINTASGDHPFDPYMSLLKTAGILEAQKTQEMLDF  
**CAAHK**IYPEVEMVAIQNVNEALERVIKRDVKYRF**VIEIEK**SLK

## Protein No.: I-516

**Protein name and Species:**

**Acetylornithine deacetylase, putative OS=Ricinus communis**

**GN=RCOM\_0864770 PE=4 SV=1**

**Accession: tr|B9S1F8|B9S1F8\_RICCO**

**Unused ProtScore: 4.57**

**Seq Cov %: 12.2**

**ITRAQ Changed Ratio:**

**117: 115=E3TL: D3TL=0.14**

**116: 114=E5TL: D5TL=0.57**

**Annotated typical Precursor MS Region:**

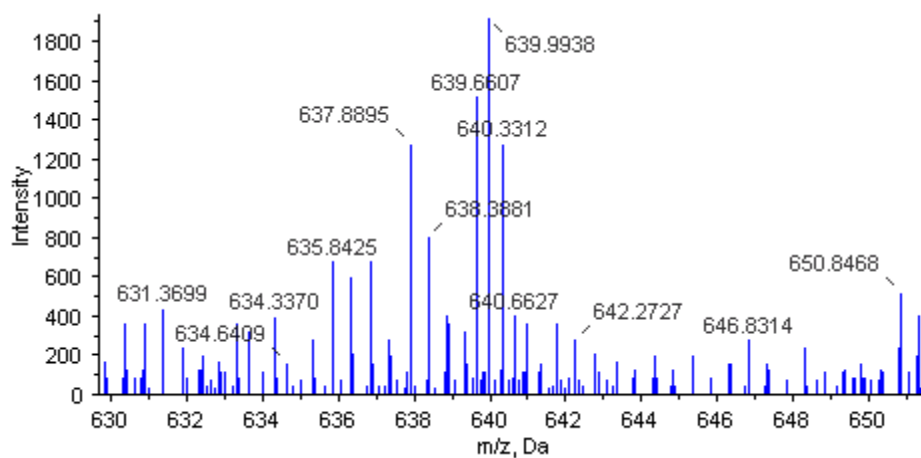



## Sequence Coverage and Matched peptides: in different color

MANVEEILGELDKESFVTLRKKIIGESK**HVQNNPPELIPEEDR**VVKHVLDSELLPYSTTSGGGPLIVNHV  
SYFPG**RGNLIVEYPGTEPGK**ILSFVGMHMDVVTANPNDFEFPFSLTINGDKLCGR**GTTDCLGHVAVVT**  
**ELMK**MMLAEKKPKLKSTVVAVFIANEENSAITGVGVDALVQDGLLDKLGKGGPLFWIDTADKQPCIGTGGM  
IPWKLHVTGKLFHSGLAHKAINALELAMDALQEMQSRFYKDFPPHPREQVYGFATASTMKPTQWSYPGG  
GINQIPGECTISGDVRL**TPFYNLVDVK**NML**QEVVDDINENIEK**LGTRGPVSKYVLPDENLRGSITLTFE  
EAMSGVACNLDSRGFHVLCATEKVVGHVKPY**SITGSLPLIR**ELQEEGFVQTAGYGLMATYHAKNEYC  
LLSDMCQGYRVFVSIISQLED

## Protein No.: I-520

**Protein name and Species:**

Isoleucyl tRNA synthetase, putative OS=Ricinus communis

GN=RCOM\_0574620 PE=3 SV=1

**Accession:** tr|B9SUT5|B9SUT5\_RICCO

**Unused ProtScore:** 4.51

**Seq Cov %:** 5.6

**ITRAQ Changed Ratio:**

**117: 115=E3TL: D3TL=0.38**

**116: 114=E5TL: D5TL=0.57**

**nnotated typical Precursor MS Region:**

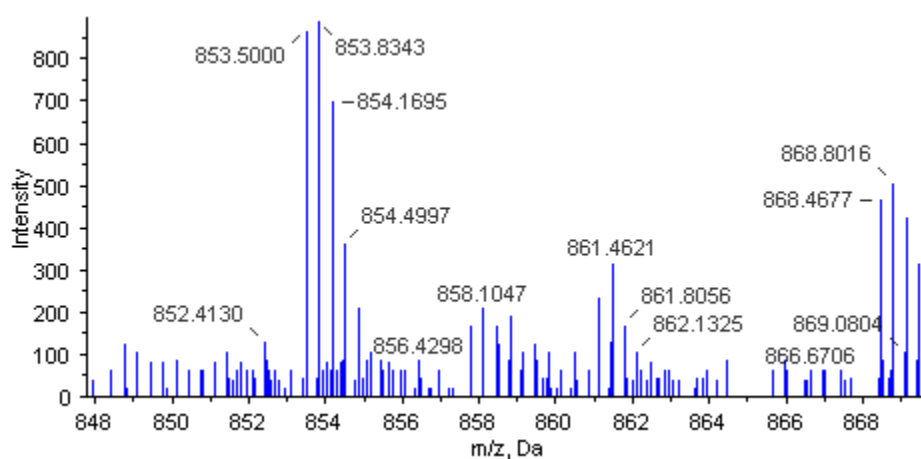

## Sequence Coverage and Matched peptides: in different color

MEEVCEGKDFSFNQEEKILSFWSEIK**AFETQLSR**TESLPEYIFYDGPFFATGLPHYGHILAGTIK**DIV**  
**TRY**QTMRGHHVTRRFQWDCGLPVENEIDRKLGIQRRDEVLMGIDKYNEECRSIVTRYVGEWEKVI**TR**  
TGRWIDFKND**DYKT**MDLKFMESVWVWFYQLFDKGLVYK**GFKVMPYSTGCKTVLSNFEAGQNYK**DVPDPEI  
MVAFPVDDPHNAAFVAWTTTPWTLPSNLALCVNGNFDYVKVRNKYTGK**VYVVAESRLSALPTEKPKSS**  
AVNGPAGGKTKGGKTENLMDSFELLEKVKGNELVKKKYVPLFNFFSDFSNTAFRVVADNYVTDDSGTGI  
VHCAPAFGEDDYRVCIE**ENQ**IINKGENLIVAVDDDGCF**AER**ITEF**SGRYVK**DADKDIIEAVKAKGRLVKS  
GTFTHSYPPFCWRS**DTPLI**YRAVPSWFVRVEELKVQ**LL**ENNKQTYWVPDYVKEKRFHNWLENARDWAVSR  
SRFWGTPLPVWISQDGEEVIVMDSVAKLEKLSG**IKVFDLHR**HHIDHITIPSSRGPEFGVLRVDDVDFDC  
WFESGSMFYAYIHYPFENI**ELFEKSFPQFIAEGLDQTR**GWFYTL**MVL**STALFGKPAFK**NLVCNGLVLA**  
**EDGK**KMSKLLKNYSPMEV**IDD**FGADALR**LYL**IN**SPVVR**AE**TL**RFKKEGVY**SVVKD**VFLPWYNAYRFLV  
QNAK**R**LEVEGLAPFTPLDFGKLQ**SS**NVLD**R**WINSATQSLVHFV**RQ**EMDGYR**LYTVVPYLLK**FLDNLTN  
IYVRFNRKRLKGRIG**EEDCR**TALSTLYSVLLT**SCK**VMSPFT**PPF**TEVLYQ**NMRK**VSSG**A**EESIHYCS**FP**  
**Q**EEGERDERIEQSVSR**MMTIIDLAR**NIRERHYKPLKSPLR**EMIVVHHDADFLDDIAGK**LK**EYVLEELNV**  
**RSLIPCVDTLK**YASLR**AEPEFSLLGK**RLGKAMGVV**AKEIKAMSQK**DILAFEEAGEVTIASHNLK**LADIK**  
VVREFKRPDGLTEKEIDAAGDGDVLV**IMDLR**PD**ES**LYEAGVAREVVNR**IQKLRKK**VALEPTD**VVDVYFE**  
**SLDDDK**SKLGRV**LN**SQEYIKDAIGSP**LLS**STMM**PE**AVVIG**EES**YHHIYEL**SFT**TYLAR**AALVFKSDA**  
ILLTYAGNTKFAK**GLE**TYLLSRDHSNLRSEFQQRNGKITVDCIENQPAADVVLGEHLFLTVGDYFLR**TR**  
SG

# Protein No.: I-533

**Protein name and Species:**

**3R-hydroxymyristoyl ACP dehydrase [Arabidopsis thaliana]**

**OS=Arabidopsis lyrata subsp. lyrata**

**GN=ARALYDRAFT\_481086 PE=3 SV=1**

**Accession: tr|D7LDD9|D7LDD9\_ARALL**

**Unused ProtScore: 4.37**

**Seq Cov %: 9.8**

**ITRAQ Changed Ratio:**

**117: 115=E3TL: D3TL=0.31**

**116: 114=E5TL: D5TL=0.21**

**Annotated typical Precursor MS Region:**

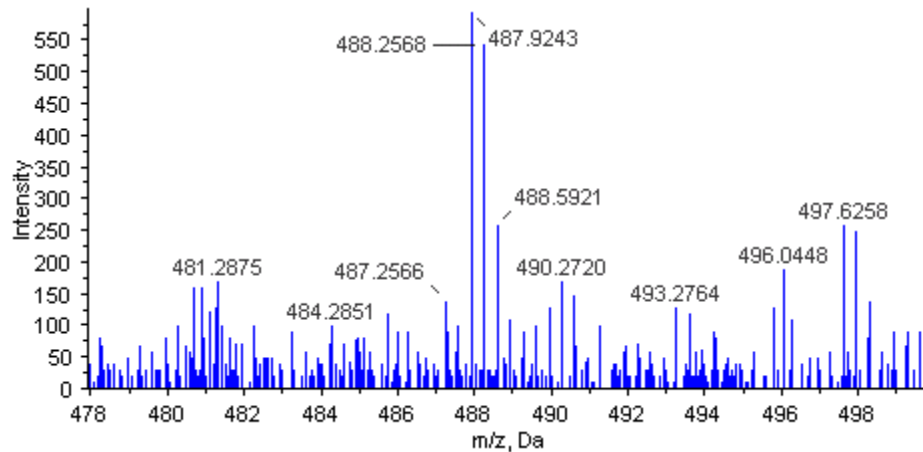

**Sequence Coverage and Matched peptides: in different color**

MATTNSVLF~~FLSSDSL~~SHHHHHHHQ~~QPLHLP~~SSRS~~HSVSL~~PPNK~~RSNSLTLRCSTNGDNTSSEK~~ETPI  
ELKFPAPPTVMD~~INQIRE~~EILPHRF~~PFLLVDR~~~~YIEYTPGVS~~AVA~~AIK~~NVTINDNFFPGH~~FPERP~~IMPGVLM  
IEAMAQVGGIVMLQPEVGG~~SQDNFF~~FAGIDK~~VRFR~~KPVIAG~~DTLV~~MRMTLLKFQKR~~FGLAKMEG~~KAYVG  
GALVCEGEFMMVSAGSS

## Protein No.: I-534

**Protein name and Species:**

**Glyceraldehyde 3-phosphate dehydrogenase, putative**

**OS=Ricinus communis GN=RCOM\_1574030 PE=3 SV=1**

**Accession: tr|B9RHV9|B9RHV9\_RICCO**

**Unused ProtScore: 4.35**

**Seq Cov %: 20**

**ITRAQ Changed Ratio:**

**117: 115=E3TL: D3TL=0.23**

**116: 114=E5TL: D5TL=0.36**

**Annotated typical Precursor MS Region:**

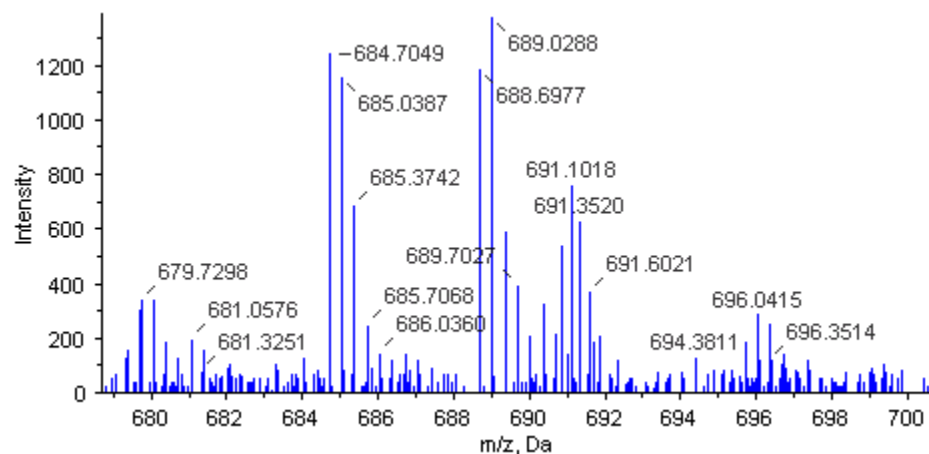

## Sequence Coverage and Matched peptides: in different color

MAFSCILRSTATSPLIEASRSDLSPSPSDPLQASSVNFNRDLKASKSFFGTSTVPTASSSLEACSARSLQ  
PIKATVTEMPPTILKSRSDGRTK**IGINGFGR**IGRLVLR IATLR**DDVDVAVNDPFIDTK**YMAYMLKYDS  
THGLFKGHIKVVDESTLEINGKQIKVSSKRDPAEIPWGDHGAEYVVEASGVFTTIDK**ASAHK**KGGAKKV  
VISAPSADAPMFVVGVNEQTYKPNMDIVSNASCTTNCLAPLAKVVHEE**FGIVEGLMTTVH**ATTATQK**TV**  
**DGPSMK**DWRGGR**GAGQNIIPSSTGAAKAVGKVLPELNGLTGMAFR**VPTPNVSVVDLTCRLEKSASYED  
VKAAIKYASEGPLK**GILGYTDEDVVSNDVFGDSRSSIFDAK**AGIGLSAAFMK**LVSWYDNEWGYSNRVLD**  
**LIEHMALVAAQN**

# Protein No.: I-536

**Protein name and Species:**

**Glutathione-S-transferase OS=Rheum australe PE=2 SV=1**

**Accession: tr|B5M1W3|B5M1W3\_RHEAU**

**Unused ProtScore: 4.35**

**Seq Cov %: 12.9**

**ITRAQ Changed Ratio:**

**117: 115=E3TL: D3TL=0.22**

**116: 114=E5TL: D5TL=0.56**

**Annotated typical Precursor MS Region:**

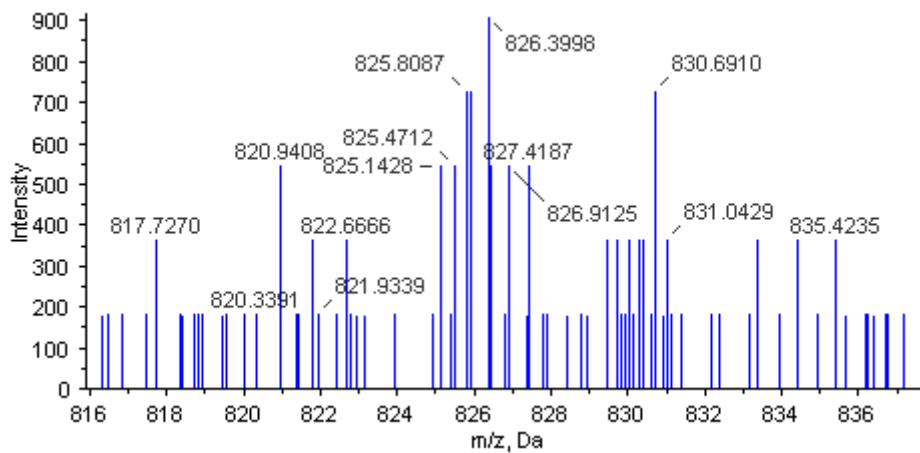

**Sequence Coverage and Matched peptides: in different color**

MAATLPPALDASSPPPLFDGTT**RLYTSYTC**PFAQRVW**ITR**NYKGLQEIKLVLGINLQNRPDWYKEKVN  
PANK**VPALEH**DGK**I**IV**ESLD**LIK**Y**VDSNFEGPSLYPDEPAKREFGEE**LLTYVSEFV**PKMYGAFKGG**DTT**  
KVADAEFDYLEKALQKFDDGPF**FLGQFSLVDI**AY**APFIER**FQLVIADV**WKYDLTAGR**PKLA**EWV**EELNK  
**IEAYK**ETKTDPDQLLPYLKSRFVAQQ

## Protein No.: I-547

**Protein name and Species:**

**Beta-1,3-glucanase** OS=*Vitis vinifera* GN=VIT\_05s0077g01150

PE=2 SV=2

Accession: [tr|Q9M563|Q9M563\\_VITVI](#)

Unused ProtScore: 4.31

Seq Cov %: 15.8

**ITRAQ Changed Ratio:**

**117: 115=E3TL: D3TL=15.42**

**116: 114=E5TL: D5TL=3.93**

**Annotated typical Precursor MS Region:**

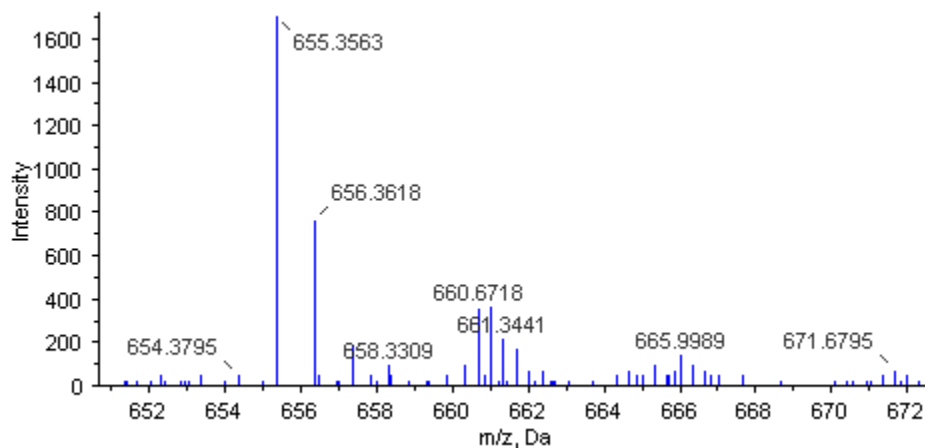



## Sequence Coverage and Matched peptides: in different color

MAAMVLLLGFLLATLQITGVKSVGVCYGMLGNNLPPASQVVALYKSRNIDRMRIYDPNQALQALRGSN  
IQLMLGVPNSDLQGLATNPSQAQSWVQRNVRNYWPGVSFRYIAVGNEVSPVNGGTSRFAQFVLPAMRNI  
RAALASAGLQDRVKVSTAILDTLLGNSYPPSQGAFRGDVRGYLDPIIRFLVDNKSPLLANIYPYFSYSG  
NPKDISLPYALFTANSVVWDGQRGYKNLFDAMLDALYSALERAGGASLEVVLSESGWPSAGGFETTVD  
NARTYNSNLIRHVKGGTPKRPGRAIETYLFAFMDENKKEPQLEKHFGLFFPNKQPKYSINFSGEKPWDV  
SSENDTNEESLKSDI

# Protein No.: I-549

Protein name and Species:

annexin [Populus tomentosa] OS=Populus trichocarpa  
GN=POPTRDRAFT\_654779 PE=3 SV=1

Accession: [tr|B9HFG8|B9HFG8\\_POPTR](#)

Unused ProtScore: 4.3

Seq Cov %: 17.7

ITRAQ Changed Ratio:

117: 115=E3TL: D3TL=0.18

116: 114=E5TL: D5TL=2.47

Annotated typical Precursor MS Region:

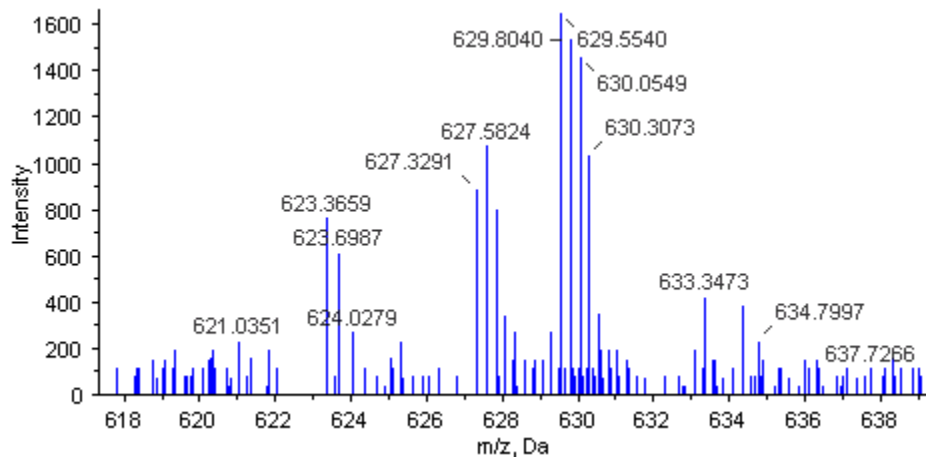

Sequence Coverage and Matched peptides: in different color

MASLKVPASVPPPYEDAEQLHKAFEGWGTNEGLIISILAHRNAAQRNLIRKVVYAEAYGQDLLKDLKEL  
SSDFERAVLLWTLDPAERDAYLANEATKRFTSSNWVLMETACTRSSHDLFKVRQAYHARYKKSLEEDVA  
YHTTGDFRKLIVPLVSAFRYEGEEVNTILAKSEAKILHEKISDKAYSDEEIIIRILTTRSKAQLNATLNH  
YNNAFGNAINKNLKEEADNDFLKLRLRATIKCLTYPEKYFEKLLRLSIKKLGTDERALTRVVTTRAEVDM  
ERIKEEYHRRNSVTLERDIAGDTSGDYERMLLALIGHGDA

## Protein No.: I-550

**Protein name and Species:**

**Argininosuccinate synthase, putative OS=Ricinus communis**

**GN=RCOM\_0395600 PE=3 SV=1**

**Accession: tr|B9SS35|B9SS35\_RICCO**

**Unused ProtScore: 4.3**

**Seq Cov %: 8.2**

**ITRAQ Changed Ratio:**

**117: 115=E3TL: D3TL=0.61**

**116: 114=E5TL: D5TL=0.40**

**Annotated typical Precursor MS Region:**

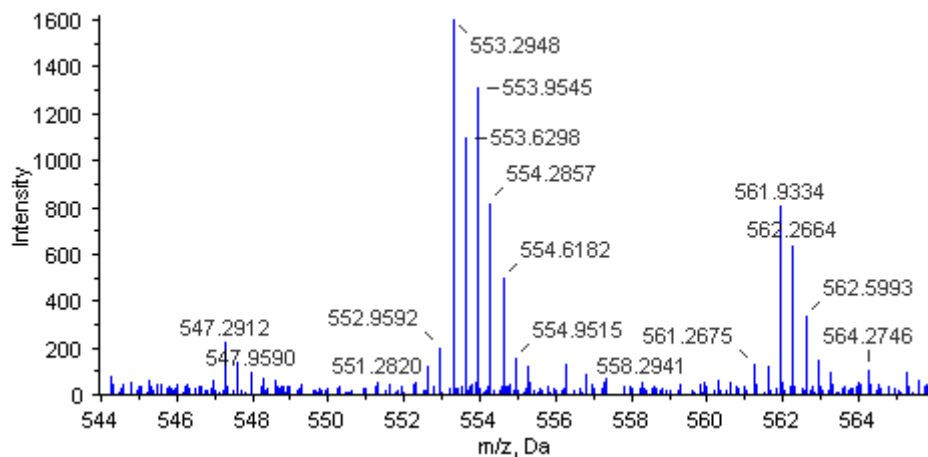

## Sequence Coverage and Matched peptides: in different color

MAISSSSFNFVHDSNR**DEFLQNHNI****PSIK**KSPTIFFKKLGAKRGELQGIA**FACTK**RVILRTHQNKAIQA  
VLSSDREVEVS**EASK**SKGLRGQLNKVVLAYSGLDTSVIVPWLRENYGCEVVCFCTADVGGQGLKELEGLE  
EKAKASGACQLVVKDLQEEFVR**DYIFPCLR**RAGAIYERKYLLGTSMARPVIAK**AMVDVAK****EVGADAVAHG**  
**CTGK**GNDQVRFELTFFALNPELNVVAPWREWDIKGREDAIEYAKK**HNVVPVPTK**KSIYSRDRNLWHLSH  
EGDILEDPANEPNKDMYMSVDPEDAPNQPEYIEIGIVSGLPVSVNGK**QLSSASLLS****QLNEIGGR****HGIG**  
**RIDMVENR**LVGMKSRGVYETPGGTILFTAARELESITLDRETMQVKDSLALK**YAEVYAGR**WFDPLRES  
MDAFMEK**ISEK**TTGSVTLKLYKGSVLVTSRTSPYSLYR**QDISSFESGK**IYDQADAAGFIRLYGLPMKVR  
AMLENGI

# Protein No.: I-552

Protein name and Species:

Glycerophosphodiester phosphodiesterase-like protein

(Fragment) OS=Manihot esculenta PE=2 SV=1

Accession: [tr|Q5PYQ3|Q5PYQ3\\_MANES](#)

Unused ProtScore: 4.28

Seq Cov %: 9.2

ITRAQ Changed Ratio:

117: 115=E3TL: D3TL=0.13

116: 114=E5TL: D5TL=0.25

Annotated typical Precursor MS Region:

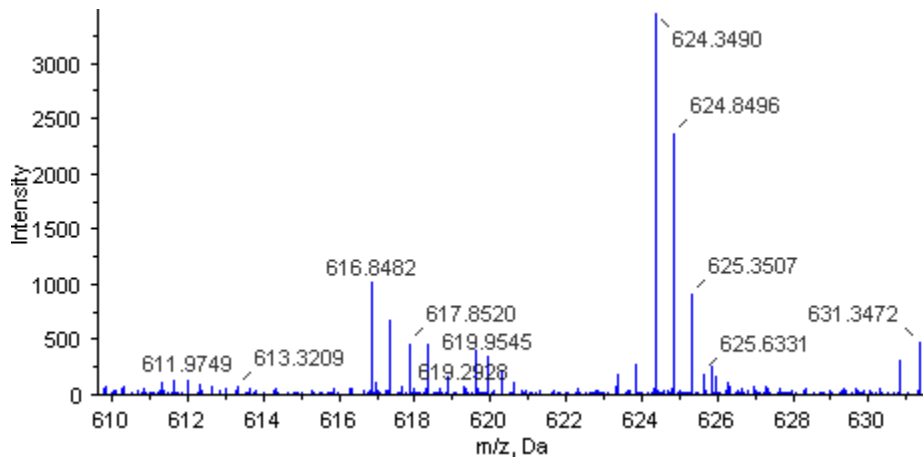

Sequence Coverage and Matched peptides: in different color

MALTCSVLIIIFLSLTLVSTATAR**RP**I**Y**PL**PSK**ISNGIRKPLQTSRPYNIAHR**GS**N**GE**I**PE**E**TAA**Y**MRA**I  
**EE**G**AD**F**IE**T**D**I**L**S**SK**DGVLICFHDVTLDN**TT****DI**A**K**HNEF**T**NR**K**RTYDVQGV**NT**T**GF**F**T**V**D**F**T**L**E**L**K**T**L**  
RVKQRHPFRDQYNGKFSII**T**F**E**E**F**I**A**I**A**L**D**A**S**R**V**G**I****Y**P**EM****K****N**P**V**F**I****N****Q****H****V****K**WPGGKRFEDKFVETLK  
KYGYKGSYMSKDWLK**Q**P**V****F**I**Q**S**F**A**P**T**S**L**V****Y**I**S****N**M**T**D**S**P**K**IFLIDDDIDIP**T**Q**D**T**N**Q**S**W**E**I**T**S**D**A**Y**L**D**Y**I**  
KNYVVGH

## Protein No.: I-556

**Protein name and Species:**

**DNA-binding protein smubp-2, putative OS=Ricinus communis**

**GN=RCOM\_0089600 PE=4 SV=1**

**Accession: tr|B9SL55|B9SL55\_RICCO**

**Unused ProtScore: 4.24**

**Seq Cov %: 7.6**

**ITRAQ Changed Ratio:**

**117: 115=E3TL: D3TL=0.61**

**116: 114=E5TL: D5TL=0.68**

**Annotated typical Precursor MS Region:**

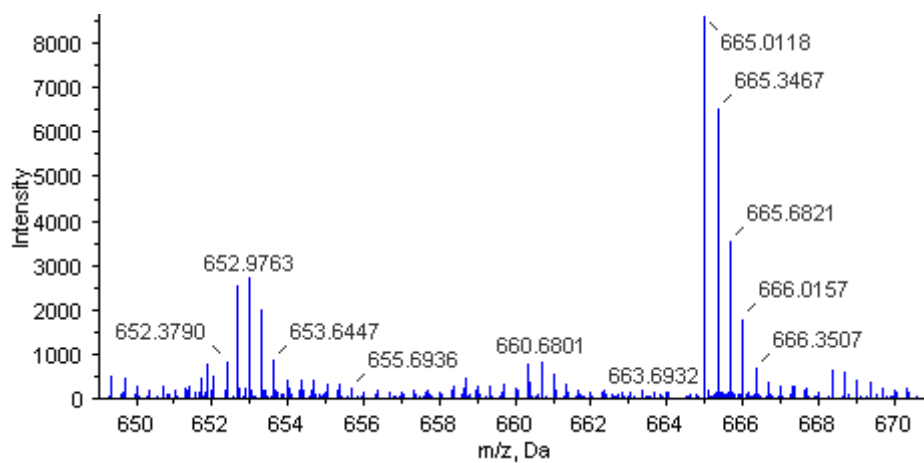

## Sequence Coverage and Matched peptides: in different color

MEKDKTKKKLSLQEFVVSITSPLLDLEKEAEISASISSGTSRNLDNAQKRGSTILNLKCVDAQTGLMGKT  
LLEFQSNKGDVLP SHRFSTHDVVVLKPNKADLGSPALGQGVVYRLKDSSITVAFDDIPEEGLNSPLRLE  
KVANEVTYRRMREALIQLSKGVQRGPAADLVPVLFGERQP TMSKKGVTFTPFNSNLDHSQKDAISKALS  
SKDVFLFHGPPGTGKTTTVEIILQEVKRGAKILACAASNIAVDNIVERLVPHRVKLVRLGHPARLLPQ  
VLDSALDAQVLKGDNSSLANDIRKEMKALNGKLLKTKDKSTRRDIQKELRTLSKEERKRQQLAVTDVIK  
NADVLTTLTGALSHKLDNTSFDLVIIDEAAQALEIACWIALLKGSRCILAGDHLQLPPTIQSVEAEKK  
GLGRTLFERLADLYGDEVTSMLTVQYRMHELIMTWSSKELYNSKIKAHPSIAAHMLSDLEGVKRSSATE  
PTLLLLIDIAGCDMEKKDEEESTLNEGEADVAVAHAKRLVENGVQASDIGIITPYAAQVLLKILRSNE  
DKLKDVEISTVDGFQGREKEAIIISMVRSNSKKEVGFSDRRR MNVAVTRARRQCCLVCDTETVTSDF  
LKRLIEYFEEHGEYLSAAEYCNE

## Protein No.: I-561

**Protein name and Species:**

**transportin, putative OS=Populus trichocarpa**

**GN=POPTRDRAFT\_570025 PE=4 SV=1**

**Accession: tr|B9I337|B9I337\_POPTR**

**Unused ProtScore: 4.21**

**Seq Cov %: 5.1**

**ITRAQ Changed Ratio:**

**117: 115=E3TL: D3TL=1.68**

**116: 114=E5TL: D5TL=1.63**

**Annotated typical Precursor MS Region:**

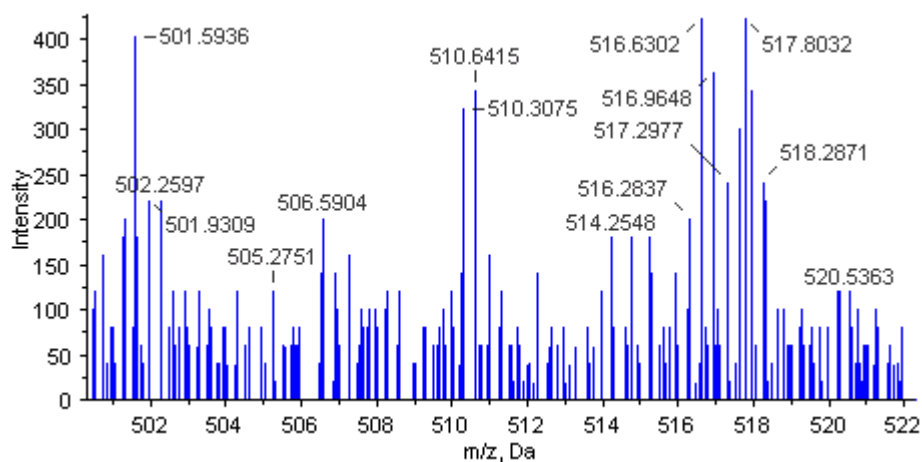



## Sequence Coverage and Matched peptides: in different color

MLAVADVLIIDAASVLGGDATLRILYVKLAEARTCLGNDHNQWHPAEAAALFCIRAI SNYVSTVEAEVMPK  
IMSLLELPHEPQLLQTVCLTIG**AYS**KWLDAAALDGF PQLSSVIKILLSGMGKSEDSAAAAAVAFRHICD  
DCRRKLCGYFDELFSIYNSAVIGEGSLKVSAGDSLHVVEAFSMVITELPADQAKLALALEKLCLPVVTP LQ  
EII SQGPDVLEKKLARELTVHIDRLAYIFR**YVNHPEAVADAIQR**LWPILK**AIFDIR**AWDMRTMESLCRA  
CKYAVRTSGRLMGITIGAMLEEIQGLYQQHHQPCFLYLSISCHLGMQIFGSDPSCAYYLKNLIEALFKC  
TTCLLTNIKDFTARPDIADDCFL LASRCIRYCPQVFIPSAVFPSLVDCSMIGVTVQHREASNSILTFLS  
DIFDLAKSSMGEQYLTIRDSV IIPRGSSITR**ILVASLTGALPSSR**LETVTYALLALTRAYGASALEWAR  
ESVSLIPSTVVTEVEQTKIFQALTDAA SGVDIKTLMGAVEELSDVCRRNRRTVQEIVQGALRPLELNLVT  
VS

# Protein No.: I-562

**Protein name and Species:**

**vacuolar protein sorting-associated protein OS=Populus  
trichocarpa GN=POPTRDRAFT\_833991 PE=4 SV=1**

**Accession: tr|B9HYZ8|B9HYZ8\_POPTR**

**Unused ProtScore: 4.21**

**Seq Cov %: 17.7**

**ITRAQ Changed Ratio:**

**117: 115=E3TL: D3TL=1.60**

**116: 114=E5TL: D5TL=1.66**

**Annotated typical Precursor MS Region:**

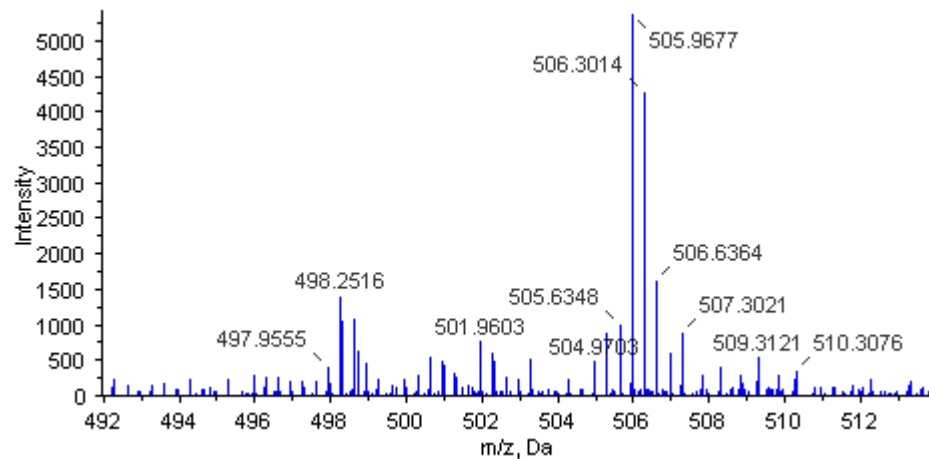

**Sequence Coverage and Matched peptides: in different color**

MEVKLWNDKRE REMYDNFAELYAIIKATEKLEKGYVRDI I SSSQYETECQKLI AHFKTLASTFKDTVPS  
IERFADTYKMDCPAAINR **LVTS** **SGVPAT** **VEHR**AAAAASSTTSAAVVAECVQNFITAMDSLKLN MVAVDQV  
HPLLSDL SASLNK **LSILPPDFEGK**TKMKEWILRLSK **MGA** **ADEL** **TEQQAR**QLHFDLESSYNSFMAALPSA  
GT

## Protein No.: I-563

**Protein name and Species:**

**Aspartic proteinase, putative OS=Ricinus communis**

**GN=RCOM\_1225960 PE=3 SV=1**

**Accession: [tr|B9SFR8|B9SFR8\\_RICCO](#)**

**Unused ProtScore: 4.2**

**Seq Cov %: 16**

**ITRAQ Changed Ratio:**

**117: 115=E3TL: D3TL=0.29**

**116: 114=E5TL: D5TL=0.42**

**Annotated typical Precursor MS Region:**

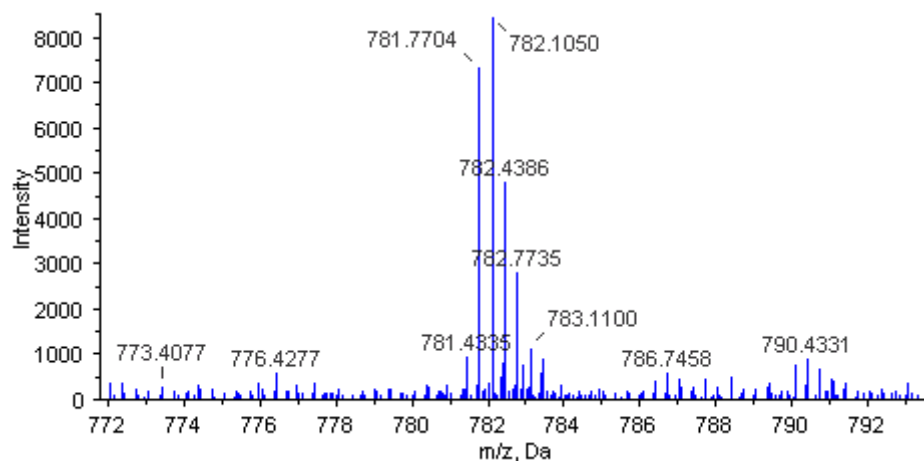

## Sequence Coverage and Matched peptides: in different color

MGTKSSALWISFVLLLPVVFSLHNDALVR**VGLK**KKKFDQVNIIPAGTVDFKEGEAMRAATKKYNLVENS  
DVIDIVELKNYLDAQYYGEIAIGTPPQTFTVIFDTGSSNLWIPSSK**CYFSVACYFHSK**YKASESSTYQKN  
GTSAAIRYGTGSI SGFFSQDNVKGDLVIRNQDFIEATK**EPGVTF**LAAKFDGILGLGF**QEISVGK**AIPV  
WYNMVNEGLVKEQVFSFWLNRNVQAEEGGEIVFGGMDPNHYK**GQHTYVPVTQK**GYWQFDMGEVLIGNEI  
TGLCADGCK**AIADSGTSLLAGPTTVITQINHAIGASGIVSQECK**TVVEQYGKFILEMLTAQAQPQKICS  
QIGFCTFDGTQGVSTNIESVVDKSKETASDGLQQDSACTVCEMIVVWMQNRLRLNETV**DQILNYV**NKLC  
DRLPSPNGESAVDCSSLSMPIVSF**TIGGK**AFKLTADQVKGC

# Protein No.: I-567

**Protein name and Species:**

**Profilin-1 OS=Hevea brasiliensis PE=1 SV=1**

**Accession: sp|O65812|PROF1\_HEVBR**

**Unused ProtScore: 4.17**

**Seq Cov %: 50.4**

**ITRAQ Changed Ratio:**

**117: 115=E3TL: D3TL=0.65**

**116: 114=E5TL: D5TL=1.98**

**Annotated typical Precursor MS Region:**

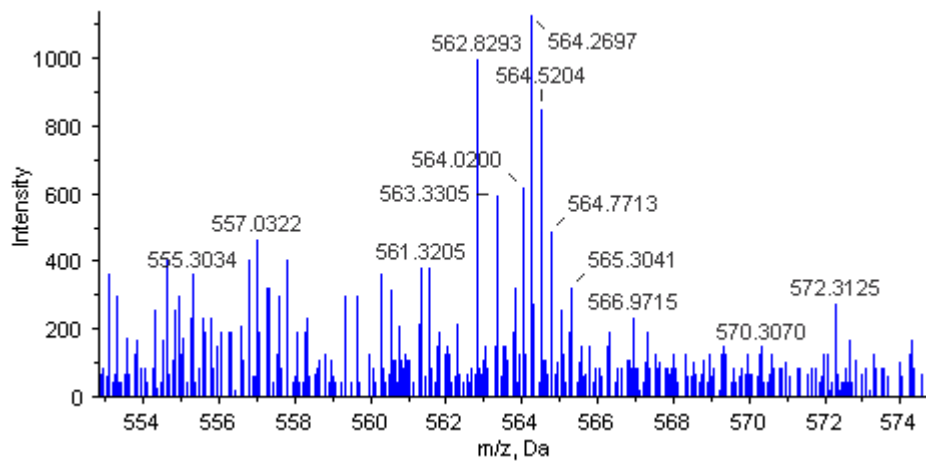

**Sequence Coverage and Matched peptides: in different color**

MSWQTYVDERLMCEIEGNHLTAAAIIGQDGSVW**AQSSNFPQFK****SEEITAIMSDFDEPGTLAPTGLHLGG**  
**TKYMVIQGEAGAVIR****GKKGPGGVTVRK****TNQALIIGIYDEPMPGQCNMIVER**LGDYLLLEQGM

# Protein No.: I-572

**Protein name and Species:**

**ribosomal protein-like,P0 OS=Solanum tuberosum PE=2 SV=1**

**Accession: tr|Q307Z8|Q307Z8\_SOLTU**

**Unused ProtScore: 4.15**

**Seq Cov %: 7.5**

**ITRAQ Changed Ratio:**

**117: 115=E3TL: D3TL=7.45**

**116: 114=E5TL: D5TL=2.63**

**Annotated typical Precursor MS Region:**

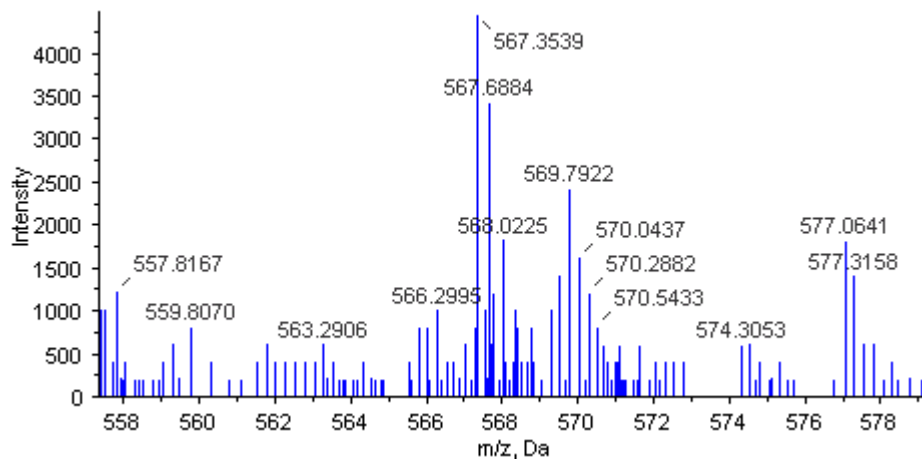

**Sequence Coverage and Matched peptides: in different color**

MAPKATKAEEKKIAYDTKMCQLLDDFTQVLVAAAADNVGSNQLQSIRKGLRGDSVVLMGKNTMMKRITIRVH  
AEKTGNETILNLIPLLVGNVGLIFTKGDLKEVSEEVAKYKVGAPARVGLVAPVDVVVPPGNTGLDPSQT  
SFFQVLNIPTKINKGTVEIITPVELIKKGDKVGSSEAALLAKLGIRPF SYGLVVVSVDNGSVFSPEVL  
DLTEDDLIEKFAMGVSMVTSLALAI SYPTLAAAPHMFTNAYKNVLAIAVETDYSFPLADKVKEYLADPS  
KFAVAAAAPAAAAGSGAAPAAAKEEEEKKEEPAEVSDDDMGFSLFD

# Protein No.: I-578

**Protein name and Species:**

**Copper transport protein ATOX1 OS=Hevea brasiliensis**

**GN=CCH PE=4 SV=1**

**Accession: tr|D4P094|D4P094\_HEVBR**

**Unused ProtScore: 4.13**

**Seq Cov %: 45.4**

**ITRAQ Changed Ratio:**

**117: 115=E3TL: D3TL=0.65**

**116: 114=E5TL: D5TL=0.52**

**Annotated typical Precursor MS Region:**

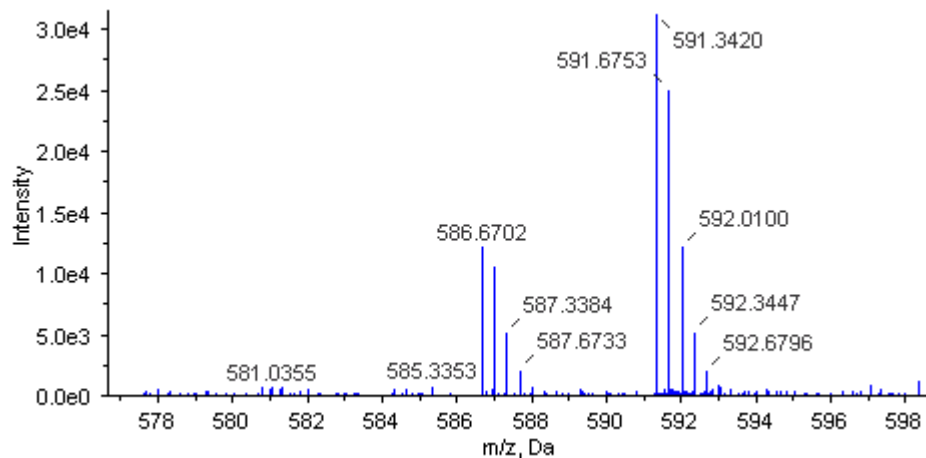

**Sequence Coverage and Matched peptides: in different color**

MSQTVVLLK**VGMSCEGCVGAVK**RVLGK**MEGVESYDIDLK**EQKVTVK**GNVQPEAVLQTVSK**TGKK**TTFWEA**  
**EAPAEPETKPAETVTVA**

# Protein No.: I-580

**Protein name and Species:**

**auxin-induced protein PCNT115 OS=Glycine max PE=2 SV=1**

**Accession: [tr|C6TIG8|C6TIG8\\_SOYBN](#)**

**Unused ProtScore: 4.12**

**Seq Cov %: 10.2**

**ITRAQ Changed Ratio:**

**117: 115=E3TL: D3TL=0.60**

**116: 114=E5TL: D5TL=2.02**

**Annotated typical Precursor MS Region:**

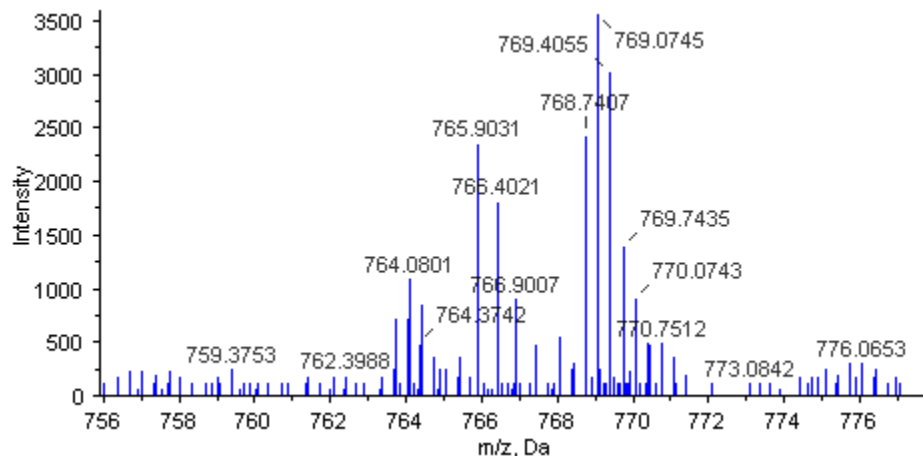

**Sequence Coverage and Matched peptides: in different color**

MEKLQLHVPRVKLGSQGLEISRLGFGCVGLSGLYNAPLSHEAGCSIIKEAFNMGVTFDFDTSDFYGLN**HD**  
**NEIMIGK**ALKELPREKVQLATKFGFLVRSDGV**FAGVK**GTPEYVVRQCCEASLKRLDVEYIDLYYQHR**VDTS**  
**VPIEDTMGELK**KLVNEGKIKYIGLSQASPDTMKRAHAVHPISALQMEYSLWTR**DIEEEIIPLCR**ELGIG  
IVAYSPLGHGFFAGKAAVETLPSQSALAEDARFSGENLEKNKLFYNRIADLASKHSCTPSQLALAWFLH  
QGNDIVPIPGTTKIKNLENNVGSVAVKLTNAELSEISDAVPVYEVAGEAPGLGSLSQYTWKFATTPSK



# Protein No.: I-584

**Protein name and Species:**

**FH protein interacting protein OS=Populus trichocarpa**

**GN=POPTRDRAFT\_809550 PE=4 SV=1**

**Accession: tr|B9IPT2|B9IPT2\_POPTR**

**Unused ProtScore: 4.09**

**Seq Cov %: 14**

**ITRAQ Changed Ratio:**

**117: 115=E3TL: D3TL=0.64**

**116: 114=E5TL: D5TL=1.17**

**Annotated typical Precursor MS Region:**

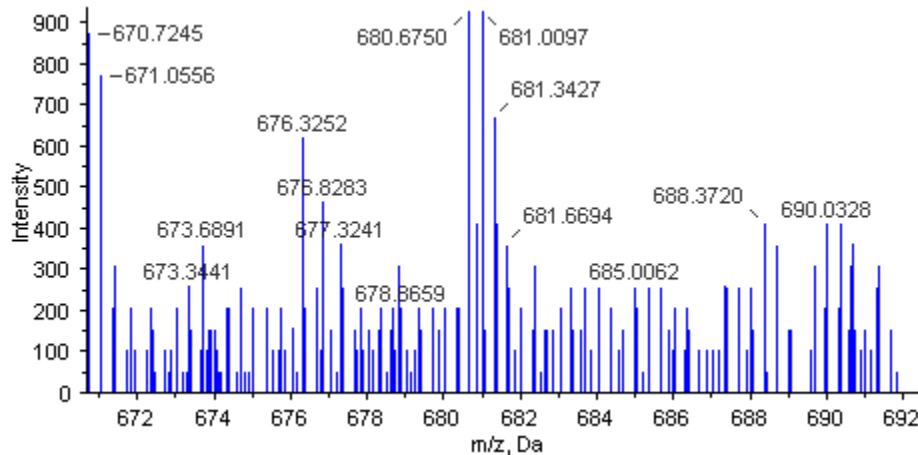

## Sequence Coverage and Matched peptides: in different color

MKDHPFSSLIRLNIGGKKFCTTIDTLTQREPDSMLAAMFSGRHTVSEDPDKGYVFDIDRDGKHFRHILNW  
LRDGVVPTLTDAEYSELMREAVYYQLLGLVEGINSVLTRRREGDELEAELTRADIIKCLQYEKVKFRGV  
NFSGLDLSKLDLSYVDFSYASLKNVFFSRANLQCAKFRDVAEGSIFHNATLRECEFTGANLRGALLAG  
ANLKSANLQDACLVDCSFCGADLSAHLQTADLTNANLEGANLEGANLKGAKLNNANLKGANLQRAYLR  
HVNLLQNTHLEDARLDGANLVGAIR

# Protein No.: I-592

**Protein name and Species:**

**Vesicle-associated protein 1 OS=Populus trichocarpa**

**GN=POPTRDRAFT\_739862 PE=4 SV=1**

**Accession: tr|B9MUU5|B9MUU5\_POPTR**

**Unused ProtScore: 4.05**

**Seq Cov %: 8.7**

**ITRAQ Changed Ratio:**

**117: 115=E3TL: D3TL=1.71**

**116: 114=E5TL: D5TL=1.69**

**Annotated typical Precursor MS Region:**

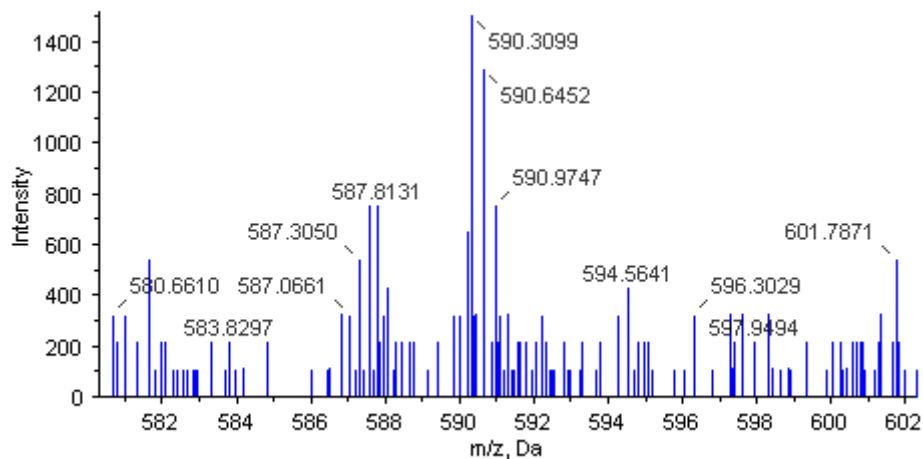

**Sequence Coverage and Matched peptides: in different color**

MSTGELLGIEPLELKF**PFELK**KQISCSLQLSNK**TDNYVAFK**VKTTNPKKYCVRPNAG**IVLPRSTCDVIV**  
**TMQAQK**EAPPDMQCKDK**FLQSVK**ANDGVTVKDINAEMFSKEAGHVVEECKLRVLYVSPPPSPVLEG  
SEEGSPPWGSVSDNGNVNGTDLSTGTRAFVEHLEPQDKPLEAGALISKLTDERNNAIQQNNKLRQE**LEL**  
**LRCQGNK**NRSGASLMFVIIIGLLGLLGGLYLMKKT

# Protein No.: I-596

**Protein name and Species:**

**Protease C56, putative OS=Ricinus communis**

**GN=RCOM\_0763700 PE=4 SV=1**

**Accession: tr|B9SJL8|B9SJL8\_RICCO**

**Unused ProtScore: 4.05**

**Seq Cov %: 12.9**

**ITRAQ Changed Ratio:**

**117: 115=E3TL: D3TL=0.52**

**116: 114=E5TL: D5TL=0.31**

**Annotated typical Precursor MS Region:**

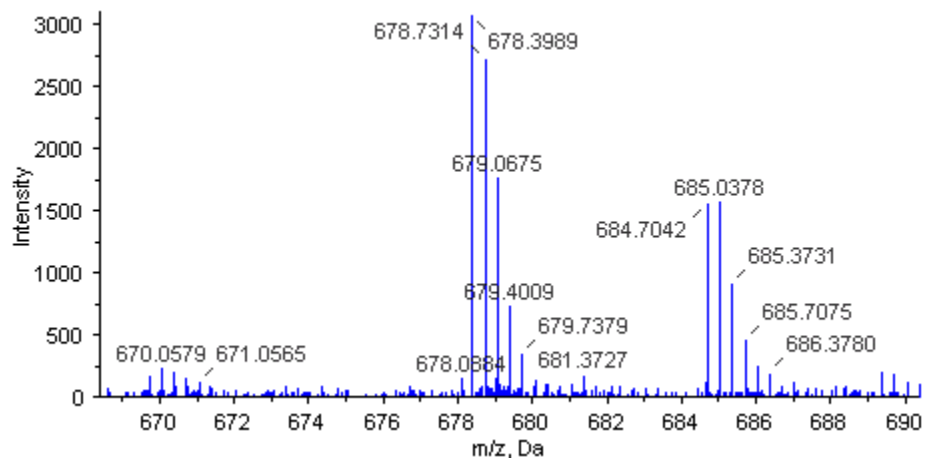

## Sequence Coverage and Matched peptides: in different color

MSHQKTVFLLCGDYMEDYEAMVPFQALLAYGVAVDAA**CPGK**KAGDYCRTAIHESSESGHQTYSESRGHNFT  
LNSTFDDIDFGKYDGLVIPGGR**APEYLAMNESVLD**CVR****KFADAGKPIASVCHGQLILAAAGLVKGRKCT  
AYPPVRPVLIAAGAHWVEPETMASCVADGNLITGATYEGHPEFIQLFVKALGGSITGADKRILFLCGDY  
MEDYEVTVPFQSLQALGCHVNAVCPKKK**AGDSCPTAVHDFEGDQTYSEK**PGHHFTLTASYVGLDVSSYD  
ALVLPGGR**APEYLALDETVIALV**K****QFMQSKKPVASICHGQQILAAAGVLKGGKCTAYPAVK**LN**V**LSGA**  
**TWLEPD**P**IDR**CYTDENLVTGAAWPGHPEFISQLMALLGIRVSF

## Protein No.: I-602

**Protein name and Species:**

**IAA-amino acid hydrolase ILR1-like 4 OS=Arabidopsis thaliana**

**GN=ILL4 PE=1 SV=2**

**Accession: sp|O04373|ILL4\_ARATH**

**Unused ProtScore: 4.04**

**Seq Cov %: 7.3**

**ITRAQ Changed Ratio:**

**117: 115=E3TL: D3TL=2.31**

**116: 114=E5TL: D5TL=1.96**

**Annotated typical Precursor MS Region:**

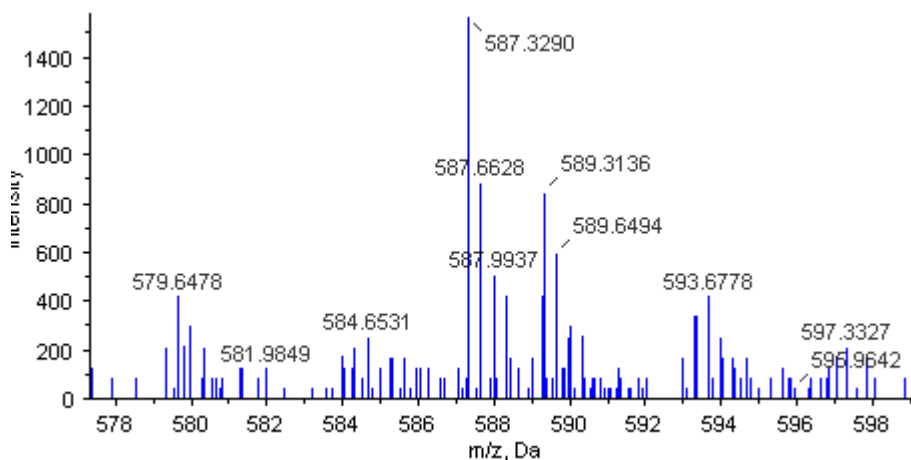

## Sequence Coverage and Matched peptides: in different color

MSFFKWVSFVLIHLNPTLISCSNGLSQIPSKFLTLAKRNDFFDWMVGIRRRIHENPELGYEEVETS  
KLVRAELEKM**GVS**YKYPVAVTGVVGYVGTGHAPFVALRADMDALAMQEMVEWEHKSKVPGKMHACGHDA  
HTTMLLGAAKLLKEHEEEL**QGT**VVL**VFQPAE**EGGG**GAK**KIVEAGVLENVSAIFGLHVTNQLALGQVSSR  
EGPMLAGSGFFKAKISGKGGHAALPQHTIDPILAASNIVSLQHLVSR**EADPLDSQV**TV**VAK**FEGGGAF  
NVIPDSVTIGGTFRAFSTKSF**MLK**KRIEQVITRQASVNM CNATVDFIEEEKPFFPPTVNDKALHQFFK  
NVSGD**MLGI**ENYVEMQPLMGSEDFSFYQQAIPGHFSFVGMQNKARSPMASPHSPYFEVNEELLPYGASL  
HASMATRYLLELKASTLNKSNKKDEL

## Protein No.: I-605

**Protein name and Species:**

**Putative uncharacterized protein OS=Ricinus communis**

**GN=RCOM\_0701460 PE=4 SV=1**

**Accession: tr|B9SC09|B9SC09\_RICCO**

**Unused ProtScore: 4.03**

**Seq Cov %: 8.3**

**ITRAQ Changed Ratio:**

**117: 115=E3TL: D3TL=0.48**

**116: 114=E5TL: D5TL=0.56**

**Annotated typical Precursor MS Region:**

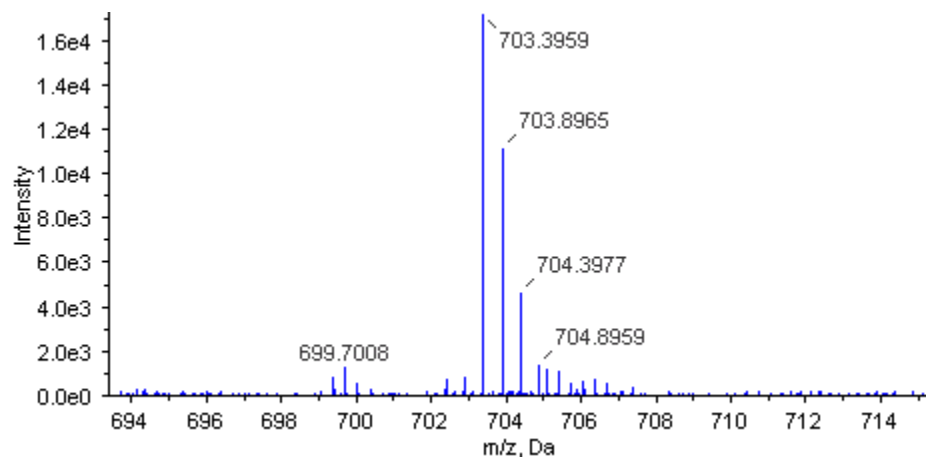



## Sequence Coverage and Matched peptides: in different color

MAPMLPKSVAIRSEFSRG**YAYYMAENEAVR**GFIRCEGENILNPYVKIEVETAQIDSKFVHLRFSHTNKY  
WGRSGPGFTQDDYWVSATSDQPEEDTSKWSCTLFEPIFDHGFLFLRHVQTGGRVRTDGPIGATGPVSRL  
LLYFRNYDNVPYLDFTFFDLGTLCLPKRVAFRGYNDMYLKAEWIERHEYLQFSSDDVNEKAAGYEITM  
MPDGHVRLRSNFFNKFWRSPNWIWADSTDTVGSDDRTLFWPVK**VNDDTIALR**NAGNNR**FCSSTAERK**  
TDCLNAAVATITREAR**LQVEELVFERS****IFNVR**FLMEYAR**IFDER**ATVAGWGS AENQSEEAATLSITVGY  
EDTTSFTFSNSLAITAGVTVGITTGLPRIAEGKIEISTEVTNTLEWNRTTSETRTASATYLANVPARSR  
**IRIDYVATRGTCNIPFSYTQR**DRLSHDGSFATTQHVDGVYTG VNYYSFHFEQPQIVPL

## Protein No.: I-606

**Protein name and Species:**

**Lipase class 3 family protein [Arabidopsis thaliana]**

**OS=Arabidopsis thaliana PE=4 SV=1**

**Accession: tr|Q9LUL3|Q9LUL3\_ARATH**

**Unused ProtScore: 4.03**

**Seq Cov %: 4.1**

**ITRAQ Changed Ratio:**

**117: 115=E3TL: D3TL=0.21**

**116: 114=E5TL: D5TL=0.40**

**Annotated typical Precursor MS Region:**

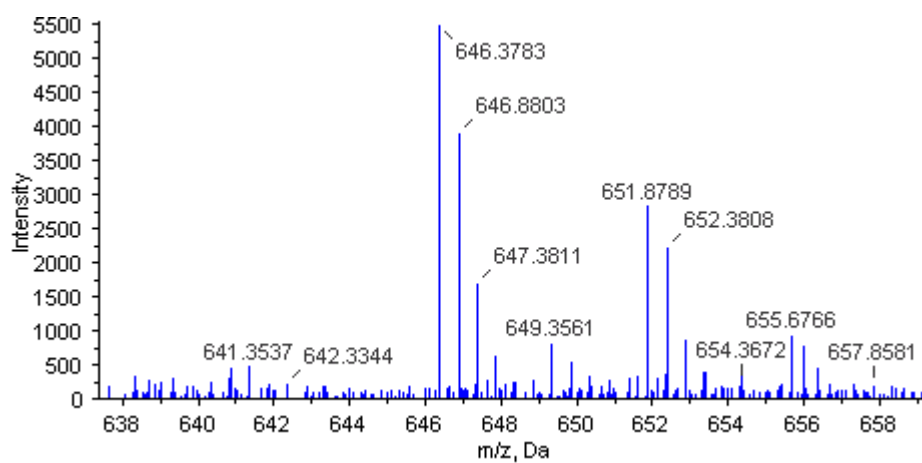

## Sequence Coverage and Matched peptides: in different color

MHKDNDSGSGSNPGQVSNYLIVRPHRGGY**IDLFR**YGVRDDQTSKAKFLEMPDNREWSTITIDEEAEDHR  
WVIVVVSILVRKIIRLLRTPMEFTGFVVDFFLNLFSAANGGFFGLLLRLIQAKVVIPERGSVTFVSTIGQL  
DGRISLYKEWNFVEHLEGIDSVDSGRVKIELGSR**GLMDLCVMASKLAYENAK**MNLVEFLDCWNDYQKQM  
STQVFVFTDKQK**DANLIVISFR**GTEPFDADDWGTDFDYSWYEVNPGKLMGFLEAMGLGNRDDTTTFH  
YNLFEQTSSEEENSKKNLDMVE**RSAYYAVR**VILKRLLEHENAR**FVVTGH**SLGGALAILFPTLLVLNE  
ETEIMKR**LLGVYTFGQPR**IGNREVGLFMKAQLNQPVDRYFRVVCNDIVPRLPYDDKTFLYKHFGLCLF  
YDSFYNETKAEDPDPNPYGLRYKILGHVIAVWELVRGLTMGYTHGPDYKEGWFRILFRMLGLVIPGLS  
DHCMTDYVNSVRLGPDNELQMSSL

# Protein No.: I-610

## Protein name and Species:

dehydrogenase/reductase SDR family member 12 [Vitis  
vinifera][Vitis vinifera] OS=Vitis vinifera  
GN=VIT\_18s0157g00200 PE=4 SV=1

Accession: tr|D7SXZ2|D7SXZ2\_VITVI

Unused ProtScore: 4.02

Seq Cov %: 15.2

## ITRAQ Changed Ratio:

117: 115=E3TL: D3TL=1.91

116: 114=E5TL: D5TL=1.58

## Annotated typical Precursor MS Region:

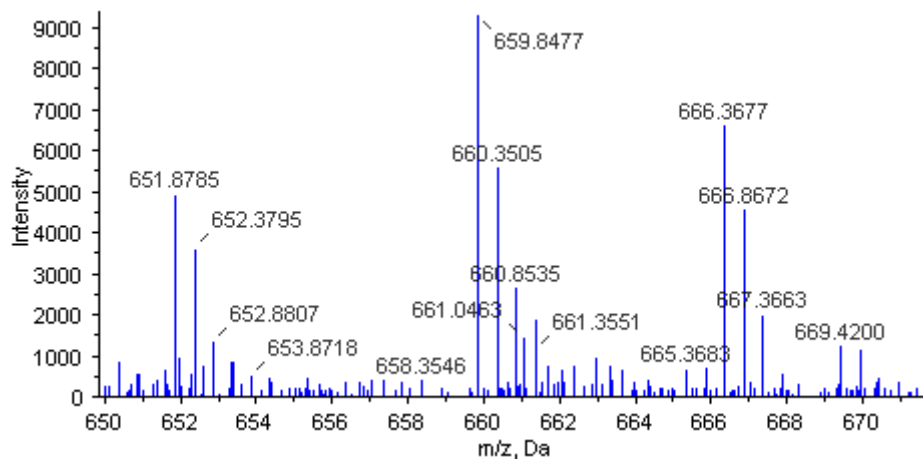

## Sequence Coverage and Matched peptides: in different color

MQNPTLHIQIHISIRESIMFILKTWRSIAFGVHGYKNSTKTGFMEHSKNFKSEDMQTQIEGK**NCIVTGA**  
**NSGIGYATAEGLASR****GANVYMVCR**NKERGEAALSEIQSK**TGNSNVHLEVCDLSSVSEIK**SFASKFSKDD  
VPIHVLVNNAGLLEYNRITTSEGFELNFAVNVVLGTF'TMTESMLP LLEKAAPDARVITVSSGGMYSVPLT  
NDLQFSDDKFDGVTQYARNKR**VQVALTEK**WAEMYKNKGIGFYAMHPGWAETSGLAKSLPGFYK**LLSGNL**  
**R**TIEEGADTI IWLALQPKEK**LVSGAFYFDR**AEAPKHLMFAATRSSHAMIDSIIGNLRSFSGLSALSS

# Protein No.: I-612

**Protein name and Species:**

**UTP-glucose-1-phosphate uridylyltransferase OS=Pyrus  
pyrifolia PE=2 SV=1**

**Accession: sp|O64459|UGPA\_PYRPY**

**Unused ProtScore: 4.01**

**Seq Cov %: 23.6**

**ITRAQ Changed Ratio:**

**117: 115=E3TL: D3TL=0.52**

**116: 114=E5TL: D5TL=0.27**

**Annotated typical Precursor MS Region:**

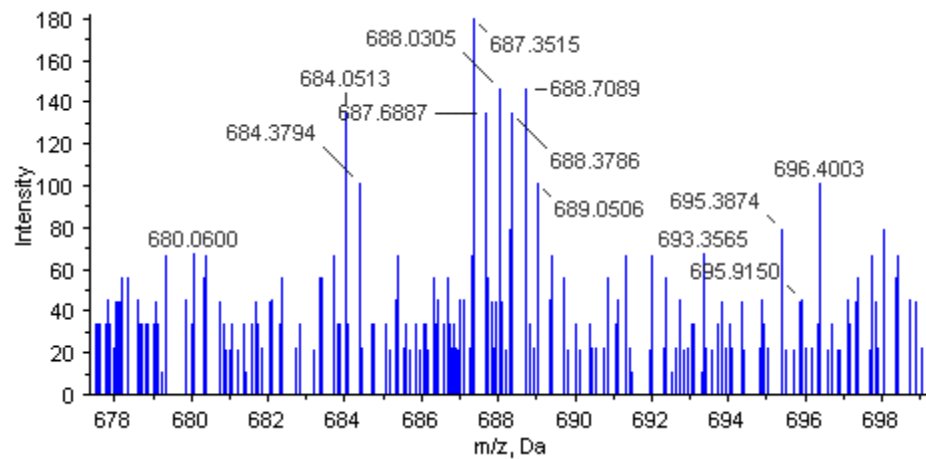

## Sequence Coverage and Matched peptides: in different color

MAAVATGNVDK LKSDVASLSQISENEKNGFINLVSR YVSGEEAQHVEWSKIQTPTDEVVVPYDGLAPT  
EDPEEIKKLLDKLVVLKLNGLGTTMGCTGPKSVIEVRNGLTFLLDLIVIQIENLNKYGSCVPLLLMNS  
FNTHDDTQKIVEKYSKSNVQIHTFNQSQYPRLVVEDFSPLPSKGQTGKDGWYPPGHGDVFP  
SLKNSGKL  
DLLLSQGKEYVFIANSNDNLGAVVDLKIHLHLIQKKNEYCMVTPKTLADVKGTTLSYEGRVQ  
LLEIAQ  
VPDQHVNEFKSIEKFKIFNTNNLWVNLNAIKRLVEADALKMEIIPNPK EVDGKVLQLETAAGAAIRFF  
NHAIGINVPRSRFLPVKATSDLLLVSQSDLYTLQDGFVTRNSARKNPENPTIELGPEFKKVG  
SYLSRFKS  
IPSILELESKLVSGDVWFGAGVVLKGVKVTITAKSGVKLEIPDNAVIANKDINGPEDL

# Protein No.: I-613

**Protein name and Species:**

**Chitinase OS=Euonymus europaeus PE=2 SV=1**

**Accession: tr|Q7Y237|Q7Y237\_EUOEU**

**Unused ProtScore: 4.01**

**Seq Cov %: 13.1**

**ITRAQ Changed Ratio:**

**117: 115=E3TL: D3TL=0.24**

**116: 114=E5TL: D5TL=0.21**

**Annotated typical Precursor MS Region:**

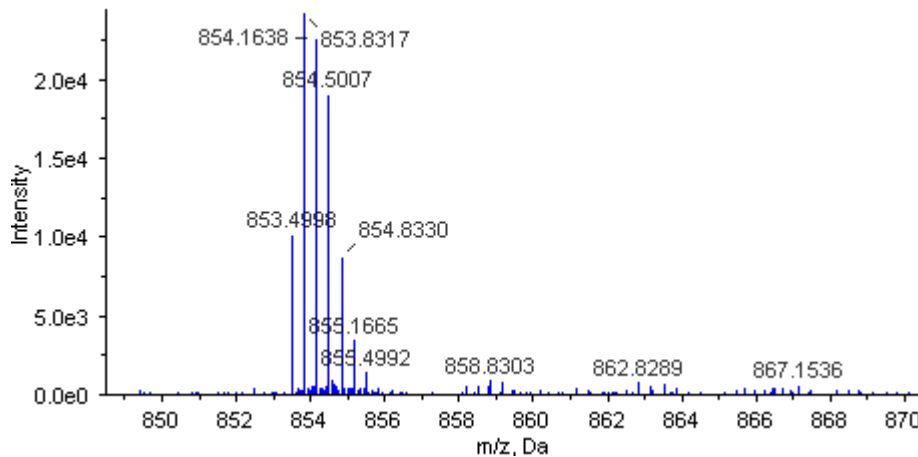

**Sequence Coverage and Matched peptides: in different color**

MRFVWF<sup>T</sup>ILSL<sup>S</sup>LS<sup>V</sup>LGSA<sup>E</sup>QCGR<sup>Q</sup>AGGALCPGGQCCSQY<sup>G</sup>WC<sup>G</sup>TTNE<sup>Y</sup>CG<sup>Q</sup>GC<sup>S</sup>Q<sup>S</sup>CGGSGGGDIGG  
IISRDRFNDILK<sup>R</sup>NDNACEGKGF<sup>Y</sup>SHDAFL<sup>T</sup>AAKAYPAF<sup>G</sup>TTGDDAT<sup>R</sup>KREIAAFLAQT<sup>S</sup>HETTGGWP  
SAPDGPYSWGYCFV<sup>R</sup>ERNPPSS<sup>Y</sup>CDPN<sup>Y</sup>PCPK<sup>Q</sup>YYGRG<sup>P</sup>LQLSW<sup>N</sup>YN<sup>Y</sup>AQ<sup>A</sup>GRAIG<sup>V</sup>DLIN<sup>N</sup>PDLVATD  
AVIS<sup>F</sup>KTAIWFWMTAQSPK<sup>S</sup>CHD<sup>V</sup>IIGSWR<sup>P</sup>SGAD<sup>T</sup>AAGR<sup>V</sup>SGYGV<sup>I</sup>TNIING<sup>G</sup>IECGK<sup>G</sup>QNPQVEDR  
IGFFRRY<sup>C</sup>QILGTGTGN<sup>N</sup>LDCYN<sup>Q</sup>RPFGARLLLLDTI



# Protein No.: I-618

**Protein name and Species:**

**HEV1.2 OS=Hevea brasiliensis PE=4 SV=1**

**Accession: tr|Q6JYQ9|Q6JYQ9\_HEVBR**

**Unused ProtScore: 4**

**Seq Cov %: 64.6**

**ITRAQ Changed Ratio:**

**117: 115=E3TL: D3TL=0.60**

**116: 114=E5TL: D5TL=0.33**

**Annotated typical Precursor MS Region:**

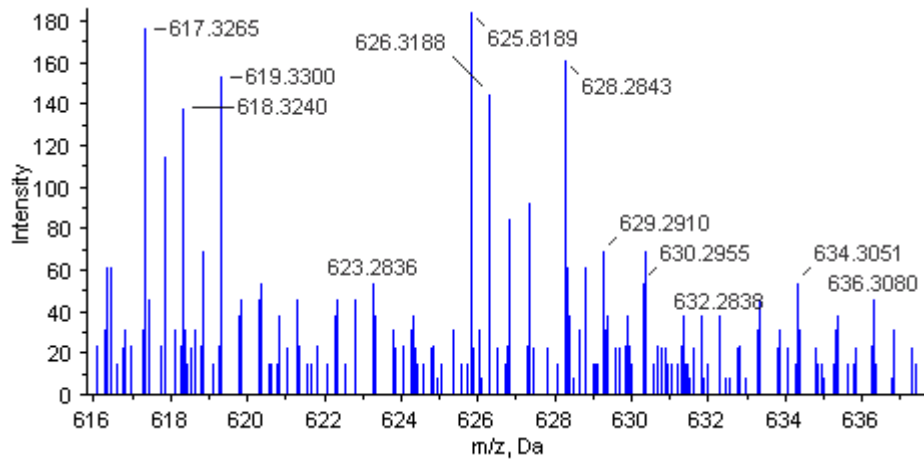

**Sequence Coverage and Matched peptides: in different color**

MN<sup>1</sup>ICM<sup>1</sup>VVLL<sup>1</sup>CL<sup>1</sup>TGVAIA<sup>1</sup>EQ<sup>2</sup>CGR<sup>3</sup>QAG<sup>4</sup>GK<sup>5</sup>LCP<sup>6</sup>NNL<sup>7</sup>CCS<sup>8</sup>QY<sup>9</sup>GW<sup>10</sup>CG<sup>11</sup>SS<sup>12</sup>DD<sup>13</sup>YC<sup>14</sup>SP<sup>15</sup>SK<sup>16</sup>NC<sup>17</sup>Q<sup>18</sup>SN<sup>19</sup>CK<sup>20</sup>GGGGGGGGSG  
GSAS<sup>21</sup>NV<sup>22</sup>LAT<sup>23</sup>YH<sup>24</sup>LY<sup>25</sup>NP<sup>26</sup>QQ<sup>27</sup>HG<sup>28</sup>WDL<sup>29</sup>NAV<sup>30</sup>SAY<sup>31</sup>CST<sup>32</sup>WD<sup>33</sup>ANK<sup>34</sup>PY<sup>35</sup>SW<sup>36</sup>RS<sup>37</sup>KY<sup>38</sup>GW<sup>39</sup>TAF<sup>40</sup>CG<sup>41</sup>PV<sup>42</sup>GA<sup>43</sup>HG<sup>44</sup>QP<sup>45</sup>SC<sup>46</sup>GK<sup>47</sup>CL<sup>48</sup>SV<sup>49</sup>TN  
TGT<sup>50</sup>GAK<sup>51</sup>TT<sup>52</sup>VR<sup>53</sup>IV<sup>54</sup>DQ<sup>55</sup>CS<sup>56</sup>NG<sup>57</sup>GL<sup>58</sup>DL<sup>59</sup>DV<sup>60</sup>NV<sup>61</sup>FR<sup>62</sup>QL<sup>63</sup>DT<sup>64</sup>DG<sup>65</sup>KY<sup>66</sup>ER<sup>67</sup>GH<sup>68</sup>LT<sup>69</sup>VNY<sup>70</sup>QF<sup>71</sup>VDC<sup>72</sup>GD<sup>73</sup>SF<sup>74</sup>NP<sup>75</sup>LF<sup>76</sup>S<sup>77</sup>IV<sup>78</sup>K<sup>79</sup>SS<sup>80</sup>VIN

## Protein No.: I-625

**Protein name and Species:**

**Pyruvate kinase OS=Ricinus communis GN=RCOM\_0248610**

**PE=3 SV=1**

**Accession: tr|B9ST42|B9ST42\_RICCO**

**Unused ProtScore: 4**

**Seq Cov %: 14.1**

**ITRAQ Changed Ratio:**

**117: 115=E3TL: D3TL=0.65**

**116: 114=E5TL: D5TL=1.05**

**Annotated typical Precursor MS Region:**

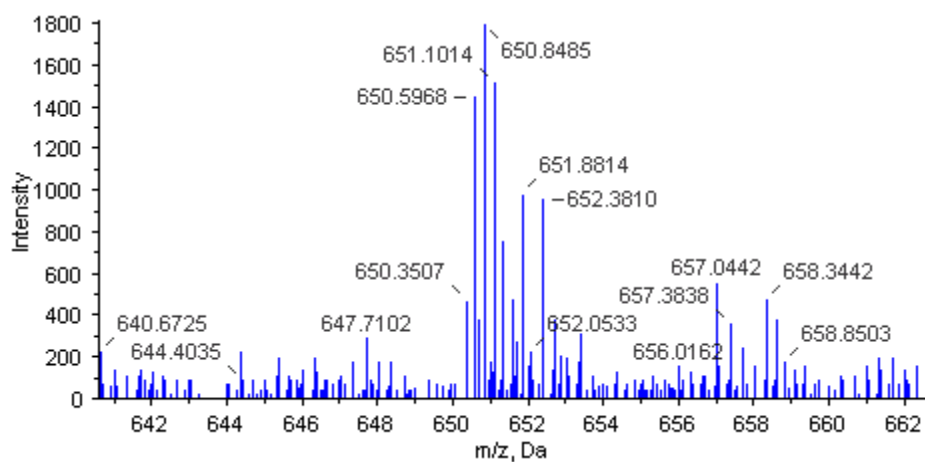

## Sequence Coverage and Matched peptides: in different color

MQGGHMVVEEPLRLSSILTPSKPSYLPSTLTK**IVGTLGPK**SRSVETIEACLNAGMSVARFDFSWLDVDYH  
QETLNNLRQAMRNAKKLCAVMVDTVGPELPICNQTVKQIELK**ADNRVTITSDVSK**EPSAEILPVNFSGL  
SQILKKGDTVFLGQYLFTGSENTSVWLEVLETNGKDVVCLVKNSATLTGFVLMH**ISQVL**SSLPTLTDND  
KKVISEWGCSDNVDIISLSYTRNVEDVREL**RAFIKTHSLHETQVFAK**IETVEGLKHFDEILQEADGIIL  
GR**GNLGIDLPEKVFLFQKSAVYKCNMAGKPVIIISR**VVDSMTANLR**PTRAEATDVANAVLDGADGILLG**  
**AETLR**GLYPIDTIRTVGRICAEAEIVCNHSFHFKRISRHVGEPM SHAESVASSAVRAAIKVKAPLIVVF  
TSSGAAPR**LIAKYRPPVPVFAVVIPR**LRSNLTKWSFT**GSAEARQLLGVRGVYPILASPLVATSGASSEV**  
**STLKVALDHGK**SVGLLKPNDQIVVFEKIGDSSVVRIMQLPS

## Protein No.: I-628

**Protein name and Species:**

**TBC1 domain family member 13 OS=Populus trichocarpa**

**GN=POPTRDRAFT\_174838 PE=4 SV=1**

**Accession: tr|B9GFV7|B9GFV7\_POPTR**

**Unused ProtScore: 4**

**Seq Cov %: 8.4**

**ITRAQ Changed Ratio:**

**117: 115=E3TL: D3TL=0.22**

**116: 114=E5TL: D5TL=0.22**

**Annotated typical Precursor MS Region:**

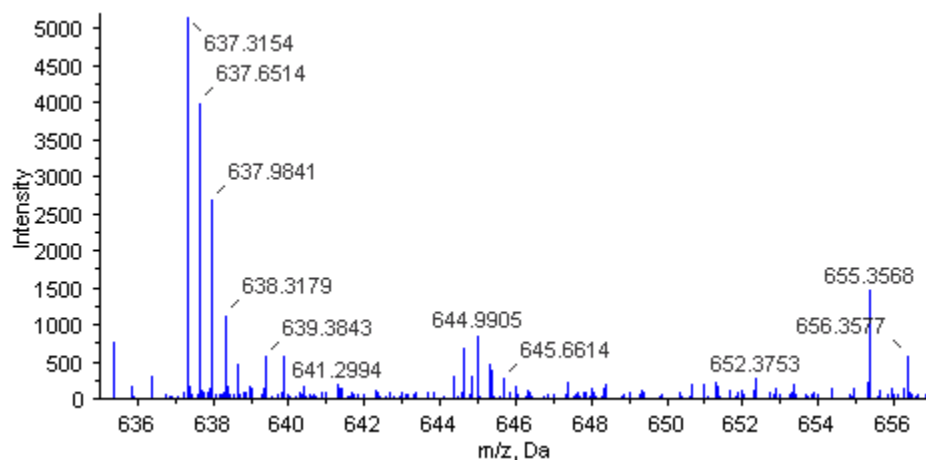

## Sequence Coverage and Matched peptides: in different color

SAAEDISKQALLLTELSKKVINMGELRRIASQGIPDGAGIRSTVWK**LLLGYLAPDR**SLWSSELAKKRSQ  
YKHFKEDLLMNPSEIARRLEKTTVLNNDNGKSESRCVLSRSEITHGEHPLSLGKSSVWNQFFQDSEIE  
QIDRDVKRTHPDLHFFSGD**SSLAK**SNQEALRNILTVFAKLNP GIRYVQGMNEILAPLFYIFKNDPDEEM  
AACAEADTFFCFVELLSGFR**DHFCQQLDNSVVGIR**STITRLSQLLKEHDEELWRHLEITTKVNPQFYAF  
RWITLLLTTQEFNFADSLHIWDTLLSDPEGPQETLLRVCCAM**LILIR**RRLLAGDFTSILKLLQNYPTNI  
SHMLYVANKLR

# Protein No.: I-631

**Protein name and Species:**

**Cytochrome b5 OS=Camellia sinensis PE=2 SV=1**

**Accession: [tr|F4YFE3|F4YFE3\\_CAMSI](#)**

**Unused ProtScore: 4**

**Seq Cov %: 29.9**

**ITRAQ Changed Ratio:**

**117: 115=E3TL: D3TL=3.05**

**116: 114=E5TL: D5TL=2.04**

**Annotated typical Precursor MS Region:**

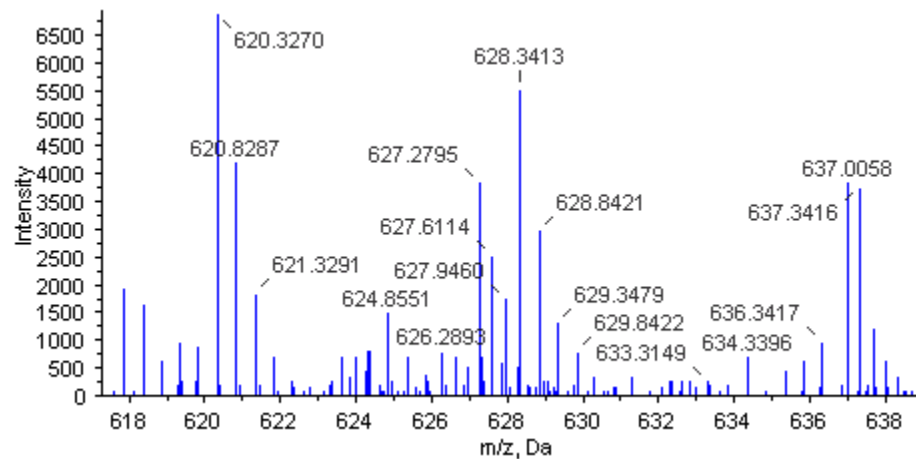

**Sequence Coverage and Matched peptides: in different color**

MASDPKIHTFEEVAKHNKTKDCWLILSGK**VYDVT**PFMDDHPGGDEVLLS**STG**KDATNDFEDVGHSDSAR

EMMEKYYIIGGIDSSTVPLKRSYIPPQQSHYKPKDKTP**EFVIK**IFQFLVPLLLILGLAFGVRYYTKEK

## Protein No.: I-634

**Protein name and Species:**

**Putative uncharacterized protei OS=Glycine max PE=2 SV=1**

**Accession: tr|C6TGB0|C6TGB0\_SOYBN**

**Unused ProtScore: 4**

**Seq Cov %: 5.7**

**ITRAQ Changed Ratio:**

**117: 115=E3TL: D3TL=0.46**

**116: 114=E5TL: D5TL=1.44**

**Annotated typical Precursor MS Region:**

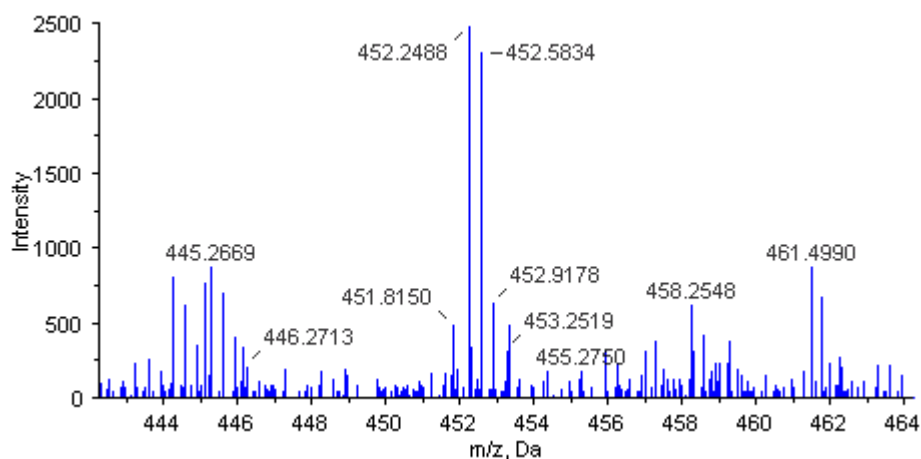

## Sequence Coverage and Matched peptides: in different color

MESASELVEFPLLLTPIDSNYR**ACTIPYR**FPSDNPRKPTPTEISWIDLFLNSIPSFKKRAESDTSVP**DA**  
**AAK**AEKFAQRYADILEDLKKDPESHGGPPDCILLCRLRELVLRELGFRDIFKKVKDEENAKAISLSENV  
VH**LND****AI****EDEGK**RLENLVRGIFAGNIFDLGSAQLVEVFSKDGMSFLASCQNLVPRPWVIDDLDTFKLKW  
SKNPWKKVIFVDNSGADIIILGIMPFARELLRRGSQVLAANDLPSINDVTCSELV**EIISK**LKDEDGQL  
VGVSTSNLLIANSGNDLPVIDLTRVSQELAYLASDADLVTL~~E~~GMGRGIETNLYAQFKCDSLKI**GMVKHP**  
**EVAQFLGGR****LYDCVFKYNEVSS**



# Protein No.: I-643

**Protein name and Species:**

**Translation machinery-associated protein 7-like OS=Hevea brasiliensis PE=4 SV=1**

**Accession: tr|D9IZZ6|D9IZZ6\_HEVBR**

**Unused ProtScore: 4**

**Seq Cov %: 32.8**

**ITRAQ Changed Ratio:**

**117: 115=E3TL: D3TL=0.30**

**116: 114=E5TL: D5TL=1.26**

**Annotated typical Precursor MS Region:**

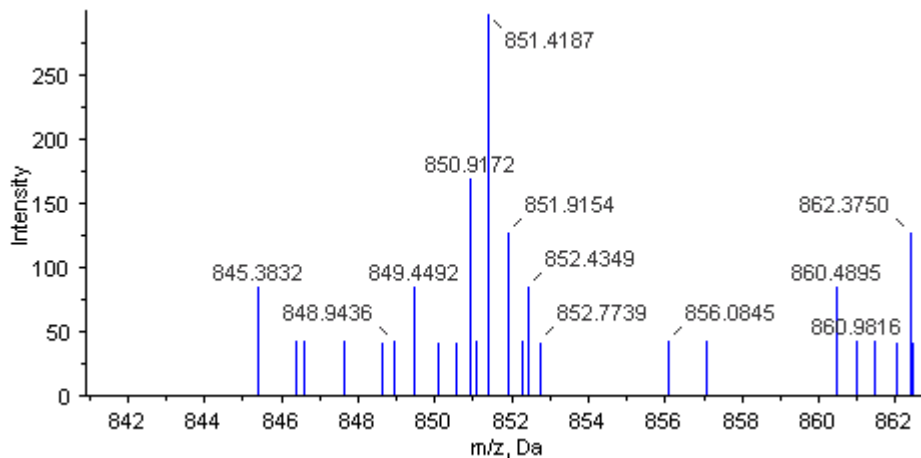

**Sequence Coverage and Matched peptides: in different color**

MSSKQGGKAKPLEQPKAEEKK**DYDETDANIQK**KKEEEKALKELRAKAAQK**GTFGGGSLK**KSGKK

# Protein No.: I-648

**Protein name and Species:**

**20 kDa chaperonin, chloroplastic OS=Vitis vinifera**

**GN=VIT\_17s0000g03620 PE=3 SV=1**

**Accession: tr|D7SIZ7|D7SIZ7\_VITVI**

**Unused ProtScore: 3.96**

**Seq Cov %: 10.8**

**ITRAQ Changed Ratio:**

**117: 115=E3TL: D3TL=0.22**

**116: 114=E5TL: D5TL=0.59**

**Annotated typical Precursor MS Region:**

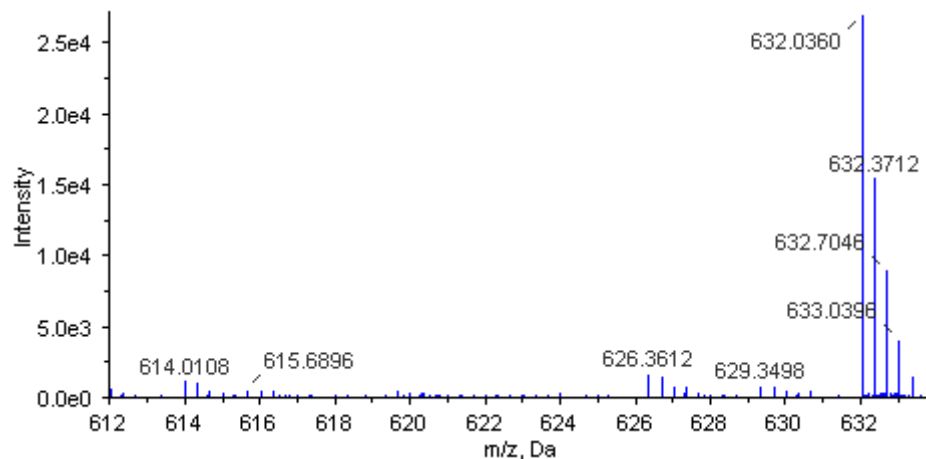

**Sequence Coverage and Matched peptides: in different color**

MATAPAISTRSLPSFEGLRPSTVVRVPLVRLPLRAAGLTQRPVVRGLVVRRAATSIGPKYTSLKPLADRVLV  
KIKTVEEKTGGGILLPPTTAQTKPQGGEVVAVGEGRTVGKNKVDIGVKTGTSVVYSKYAGTELEFNGSNH  
LILKEDDIVGILETDDIKDLKPLNDRVLIKVAVAEKTAGLLLTTEATKEKPSIGTVIAVGPGLDGE  
NRKPLSLSPGSTIMYSKYAGNEFKGSDGSDYIALRASDVMVAVLS

# Protein No.: I-650

**Protein name and Species:**

**Ribosomal protein (Fragment) OS=Jatropha curcas PE=2 SV=1**

**Accession: tr|D1ML39|D1ML39\_9ROSI**

**Unused ProtScore: 3.95**

**Seq Cov %: 16.5**

**ITRAQ Changed Ratio:**

**117: 115=E3TL: D3TL=11.48**

**116: 114=E5TL: D5TL=2.11**

**Annotated typical Precursor MS Region:**

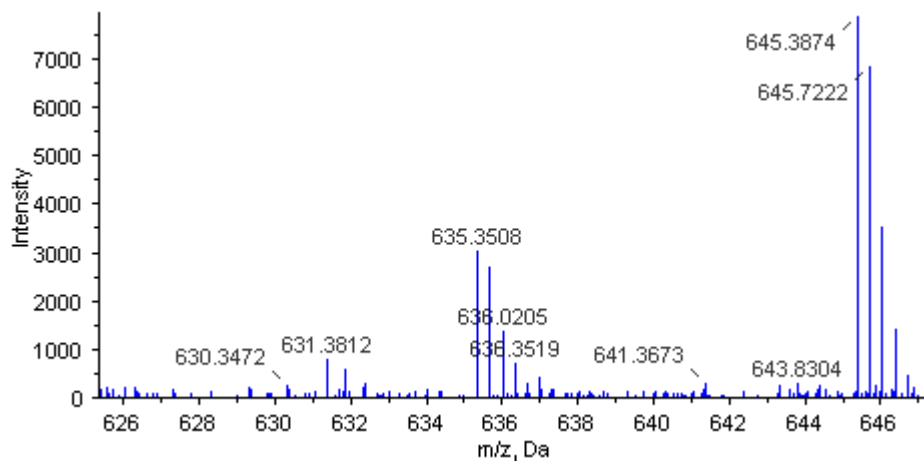

**Sequence Coverage and Matched peptides: in different color**

QSETLREAISTIMAASVEKRNFTETIELQ**I**GLKNYDPQKDKCFSGSVKLPHIPRPKMKICMLGDAQHV  
EEAEAIGLQWMDVEALKKLNKNKLVKKLAK**Q**YHAF**L**ASESVIKQIPR**LL**GPGLNKAGK**F**P**T**LV**T**HQ**E**S  
**L**ESKVN**E**T**K**AT**V**K**F**QLKKV**L**CMGVAVGNCAMEEKQVFQNVQMSVNF**L**VS**L**LLKKNWQNVK**C**LN**V**KT**T**MG**N**  
PVRIF

## Protein No.: I-651

**Protein name and Species:**

**Calcium lipid binding protein, putative OS=Ricinus communis**

**GN=RCOM\_1612600 PE=4 SV=1**

**Accession: tr|B9RDG1|B9RDG1\_RICCO**

**Unused ProtScore: 3.94**

**Seq Cov %: 9.3**

**ITRAQ Changed Ratio:**

**117: 115=E3TL: D3TL=3.40**

**116: 114=E5TL: D5TL=2.06**

**Annotated typical Precursor MS Region:**

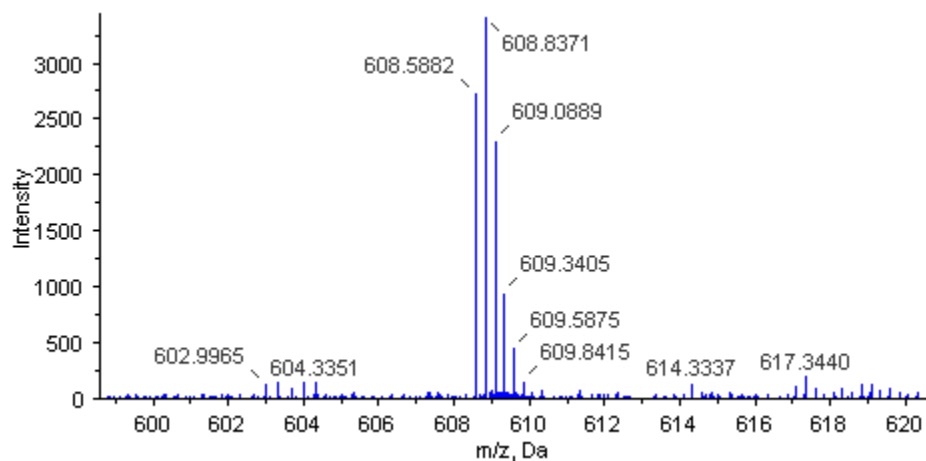

## Sequence Coverage and Matched peptides: in different color

MGLISGIFMGMIIFGIAVMAGWKHMMRYRSTKRIAKAVDIK**LLGSLNR**DDLKKICGDNFPDWISFPVFEEQ  
VKWLNKQLSK**LWPFVADAATMVVKESVEPLLEDYRPPGITS**SLK**FNKFSLGTVPPK**IEGIRVQSLKKGQI  
IMDIDFRWGGDPSIILGVEAALVASIPIQLKDL**EVYTVIR**VIFQLAEEIPCISAVVIALLLSEPKPK**IDY**  
**VLK**AVGGSLTAIPGLSDMIDDTVHSIVTDMLQWPHRVVVP**IGGIPVD**TSELELKPEGK**LTVT**VVKANDL  
KNMEMIGK**SDPYVVL**YIR**PMFKVKSRTIENNLNPVWDQTFEMIAEDKETQSLILE**VFDKDIGQDKRLGI  
AKLPLIELEAETWKQHELRL**LLPALDMLK**IKDKKDGGLTIKVLVYHAFNK**EEQLAALEEEKR**IIIEERKKL  
KEAGVIGSTMDALDGAVGLVGTGIASGVGLVGTGIGAGVGLVGTGVGAGVGIVGSGLGAVGSGLSKAGK  
FVGRFTFTGQSSKR**SGSSTPVNSVQENGGAKPL**

## Protein No.: I-653

**Protein name and Species:**

**Quercetin 3-O-methyltransferase 1 OS=Arabidopsis thaliana**

**GN=OMT1 PE=1 SV=1**

**Accession: sp|Q9FK25|OMT1\_ARATH**

**Unused ProtScore: 3.92**

**Seq Cov %: 8.3**

**ITRAQ Changed Ratio:**

**117: 115=E3TL: D3TL=0.13**

**116: 114=E5TL: D5TL=0.70**

**Annotated typical Precursor MS Region:**

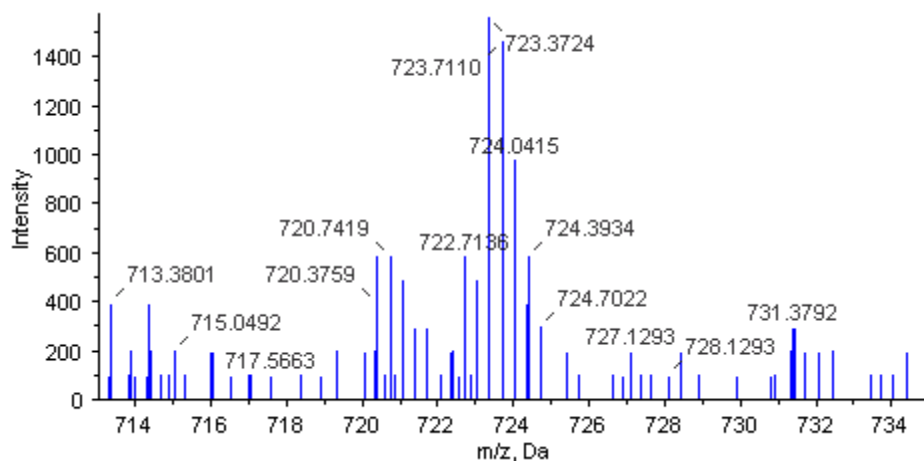

## Sequence Coverage and Matched peptides: in different color

MGSTAETQLTPVQVTDDEAALFAMQLASASVLPALKSALELDLLEIMAKNGSPMSPT**EIASKLPTK**NP  
**EAPVMLDR**ILRLLTSYSVLTCSNRKLSGDGVER**IYGLGPVCK**YLT**K**NEDGV**SIAALCLMNQDK**VL**MESW**  
YHLKDAILDGGIPFN**KAYGMSAF**EYHGTDPRFNKVFNN**GMSNHSTITMK**K**I**LE**TYK**GF**EGLT**SLVDVGG  
GIG**ATLKMIVSK**Y**P**N**LK**INFDLPHVIEDAPSHPGIEHVGGDMFVSV**PK****GDAIFMK**WICH**DWSDEHCVK**  
FLKNCY**ESLPEDGK****VILAECILPETPDSSLSTK**QVVHVDCIMLAHNP**GGKER****TEKEFEALAK**ASGF**KGI**  
KVVCD**AFGVNL****TELLK**KL

## Protein No.: I-666

**Protein name and Species:**

glyceraldehyde-3-phosphate dehydrogenase, NADP-dependent

OS=*Vitis vinifera* GN=VIT\_11s0037g00070 PE=3 SV=1

**Accession:** [tr|D7U1A1|D7U1A1\\_VITVI](#)

**Unused ProtScore:** 3.83

**Seq Cov %:** 44.6

**ITRAQ Changed Ratio:**

**117: 115=E3TL: D3TL=0.24**

**116: 114=E5TL: D5TL=0.99**

**Annotated typical Precursor MS Region:**

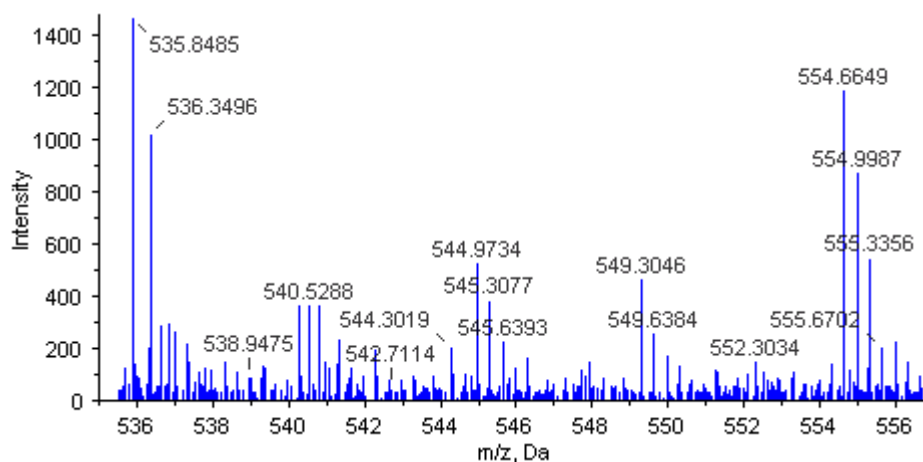



## Sequence Coverage and Matched peptides: in different color

MAGTGVFAEIIDGDVYKYYSEGEWRKAVSGKSVAILINPTTRKTQYRVQACSQEEVNKAMEIAKSAQKIW  
AKTPLWKRAELLHKAAAILKEHKAPIAECLVKEIAKPAKDAVTEVVRSGDLVSYTAEEGVRI LGEGKFL  
VSDSFPGNERSKYCLTSKIPLGVILAIPPFNYPVNLAVSKIAPALIAGNSIVLKPPTQGAVSALHMHVC  
FHLAGFPKGVISCVTGKGSEIGDFLTMHPGVNCISFTGGDTGVAISKKAGMIPLQME LGGKDACIVLED  
ADLDLVAANIVKGGFSYSGQRCTAVKVVLAMESIADTLVEKVNKAVAKLTVGPPEDDCDITPVVSESSA  
NFIEGLVMDAKQKGATFCQEYRREGNLIWPLLLDNVRPDMRIAWEEPFGPVLPLRLINSVEEGIHHCNA  
SNFGLQGCVFTRDINKAILISDAMETGTVQINSAPARGPDHFFQGLKDSGIGSQGITNSINMMTKIKS  
TVINLPSPSYTMG

## Protein No.: I-668

**Protein name and Species:**

Neutral leucine aminopeptidase preprotein OS=Solanum  
lycopersicum GN=LapN PE=2 SV=1

**Accession:** [tr|Q8GZD8|Q8GZD8\\_SOLLC](#)

**Unused ProtScore:** 3.82

**Seq Cov %:** 13.7

**ITRAQ Changed Ratio:**

**117: 115=E3TL: D3TL=0.50**

**116: 114=E5TL: D5TL=1.13**

**Annotated typical Precursor MS Region:**

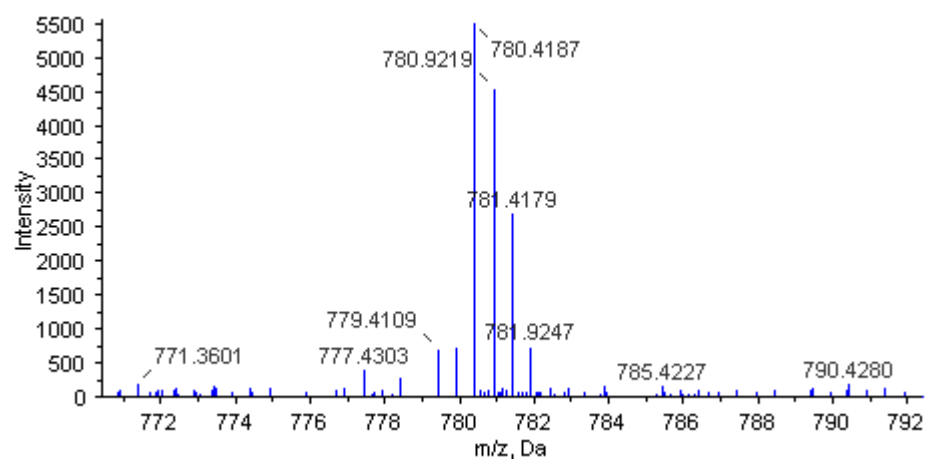

## Sequence Coverage and Matched peptides: in different color

MAALRVSSALACSSSSSFHSYP**SIFTK**FQSSPIWSFSISVTP LCSRRRAKMAHSIARDTLGLTHTNQSD  
APKIS**FAAKE**EIDLVEWKGDILTVGATEKDLARDGNSKFQNPLLQKLD SKLSGLLSEASSEED**FSGK**AGQ  
STILR**LPLGLGSK**RIALVGLGSPTSSTAAYRCLGEA**AAAAAK**SAQASNIAIALASTDGLSAELK**LSSASA**  
**ITTGAVLGT**FEDNRFK**SESK**KPTLK**SLDILGLGTGPEIEK**KIKYAADV CAGVILGRELVNAPANVLT  
PAVLAEAEAKKIASTYSDFVFSANILDVEQCKELKMG SYLAVAAA SANPAHF IHL CYKPSSGEIKKK**IALVGK**  
**GLTFDSGGYNIKTGPGCSIELMK**FDMGGAAAVL**GAAK**ALGQIKPAGVEVHFIVAACENMISGTGMR**PGD**  
**IITASNGKTIEVNNTDAEGRLTLADALVYACNQVEK**IVDLATLTGACVVALGP**SIAGIFTPSDDL**AKE  
**VVAASEVSGEK**LWRLPMEDSYWDSMK**SGVADMVNTGGR**PGGAIITAALFLKQFVNEKVQWMHIDLAGPVW  
SDKKKNATGFGVSTLVEWVLKNSTN

# Protein No.: I-680

**Protein name and Species:**

**hydrolase domain-containing protein 4-like [Vitis vinifera]**

**OS=Vitis vinifera GN=VIT\_18s0001g13610 PE=4 SV=1**

**Accession: tr|E0CPI5|E0CPI5\_VITVI**

**Unused ProtScore: 3.74**

**Seq Cov %: 14.4**

**ITRAQ Changed Ratio:**

**117: 115=E3TL: D3TL=9.46**

**116: 114=E5TL: D5TL=2.53**

**Annotated typical Precursor MS Region:**

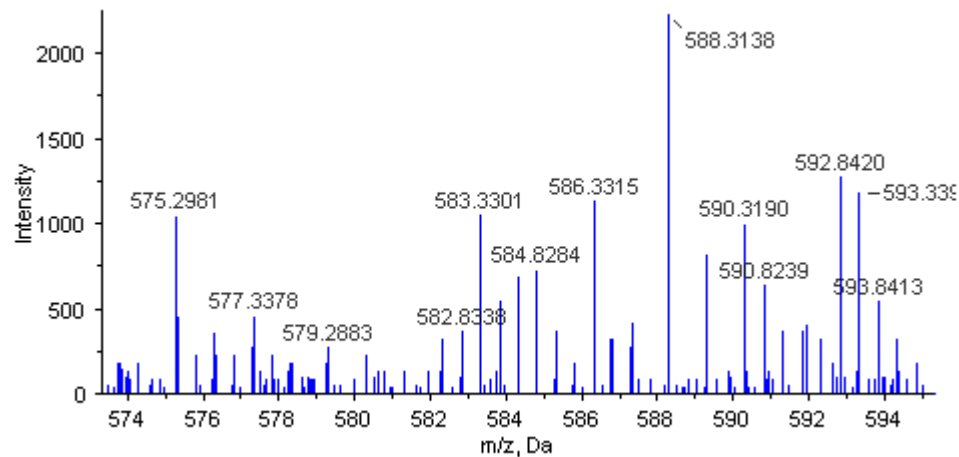

**Sequence Coverage and Matched peptides: in different color**

MAEEMTKAELGSSSSSTTKSRSLWPSLFRWIPTSTDHIIIDAEKRLLSLVKTPYVQEQVNIGSGPPGSKVR  
WFRSASNEPRFINTVTFDSKDDSPTLVMVHGYGASQGFFFRNFDALARRFRVIAIDQLGWGGSRRPDFT  
CKSTEETEAWFIDSFEEWRKAKNLSNFILLGHSVGGYVAAKYALKHPEHIQHLLILVGPAGFSLESDGKS  
EWLTRFRATWKGAVLNHLWESNFTPQKLVIRGIGPWGPDIVRKYTSARFSSYSTGDLLEESKLLTDYV  
YHTVAAKASGELCLKYIFSFQAFARLPLLHSASEWKVPTTFIYGFEDWMNYQGAQEARKQMKVPCIIIR  
VPQAGHFVVIDNPSGFHSAVLYACRRFLLPDPDSQSLPEGLTSA

## Protein No.: I-683

**Protein name and Species:**

**bifunctional polymyxin resistance protein;  
UDP-D-apiose/UPD-D-xylose synthetase [Vitis vinifera]  
OS=Vitis vinifera**

**Accession: [tr|D7SN69|D7SN69\\_VITVI](#)**

**Unused ProtScore: 3.7**

**Seq Cov %: 26.6**

**ITRAQ Changed Ratio:**

**117: 115=E3TL: D3TL=3.31**

**116: 114=E5TL: D5TL=2.04**

**Annotated typical Precursor MS Region:**

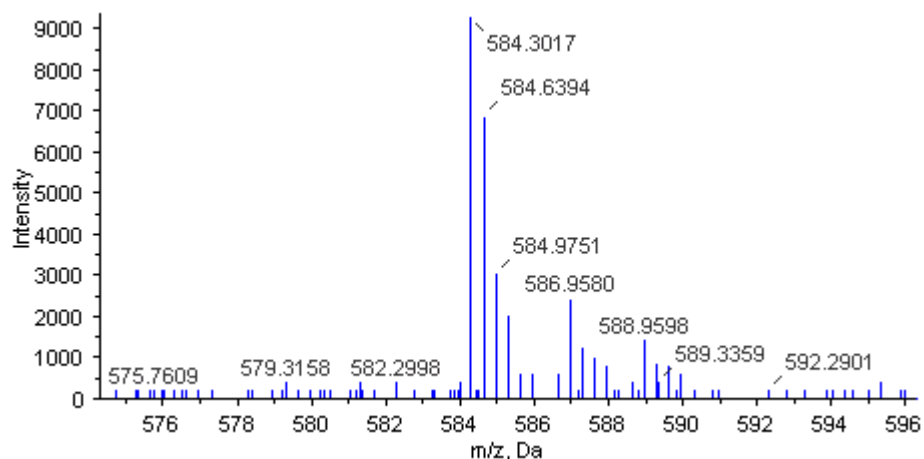

## Sequence Coverage and Matched peptides: in different color

MASAARLDLDGNAIKPMTICMIGAGGFIGSHLCEK<sub>L</sub>MAETMHKVLAVDVYSDKIKHLLLEPSTHPWSDRI  
QFHRINIKHDSRLEGLIKMADLTINLAAICTPADYNTR<sub>PLD</sub>TIYSNFIDALPVVKY<sub>C</sub>SENNKR<sub>LIHFST</sub>  
CEVYGKTIGSF<sub>L</sub>PK<sub>D</sub>SPLWQDPTYYVLKEDASPCIFGPIEK<sub>QRWSYACAKQLIERLIYAEGAENDLEFT</sub>  
IVRPFNWIGPRMDFIPGIDGPSEG<sub>V</sub>PR<sub>VLACFS</sub>NNLLR<sub>HEPLKLV</sub>DGGQ<sub>SQR</sub>TFVYIKDAIEAVLLMID  
NPARANGHIFNVGNPNNEVT<sub>VR</sub>QLAEMMTEVYAKVSGEPSLEVPTVDVSSKEFYGEGYDDSDKR<sub>IPD</sub>MT  
IINKQLGWNPKTSLWDLLESTLTYQHR<sub>TY</sub>AEAIK<sub>QA</sub>IAKPVAS

# Protein No.: I-687

**Protein name and Species:**

V-type proton ATPase subunit F OS=Hevea brasiliensis

GN=VHA-F PE=2 SV=1

**Accession:** tr|B8Y6I1|B8Y6I1\_HEVBR

**Unused ProtScore:** 3.68

**Seq Cov %:** 21.5

**ITRAQ Changed Ratio:**

**117: 115=E3TL: D3TL=1.69**

**116: 114=E5TL: D5TL=1.54**

**Annotated typical Precursor MS Region:**

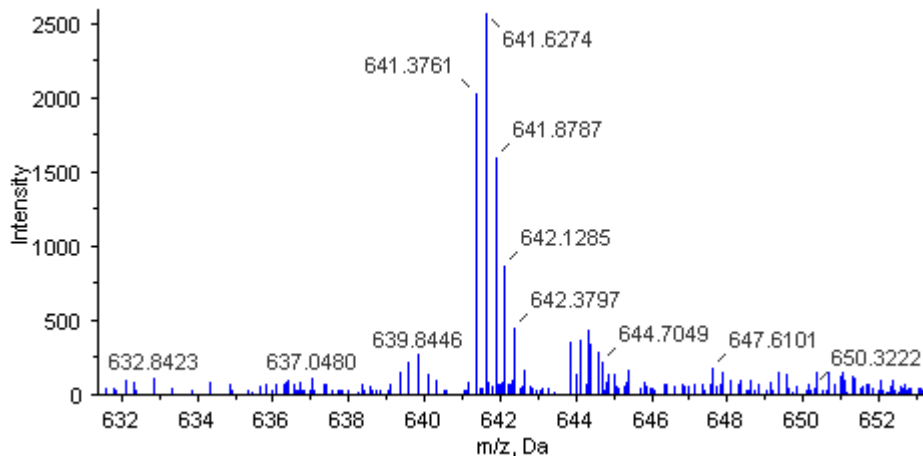

**Sequence Coverage and Matched peptides:** in different color

MANRVQIPTSN SALIAMI ADEDSVVG FLLAGVGNVDLR RKSNYLLVDSK TTVKQIE DAFKDF TTREDIA  
IVLISQYVANMVR FLVDSYNKPVPAILEIPSK DHPYDPAQDSVLSRVKHLFSAESVASERR

## Protein No.: I-688

**Protein name and Species:**

argininosuccinate lyase [Vitis vinifera] OS=Vitis vinifera

GN=VIT\_18s0001g07590 PE=3 SV=1

**Accession:** tr|E0CRW7|E0CRW7\_VITVI

**Unused ProtScore:** 3.66

**Seq Cov %:** 8

**ITRAQ Changed Ratio:**

**117: 115=E3TL: D3TL=0.54**

**116: 114=E5TL: D5TL=0.47**

**Annotated typical Precursor MS Region:**

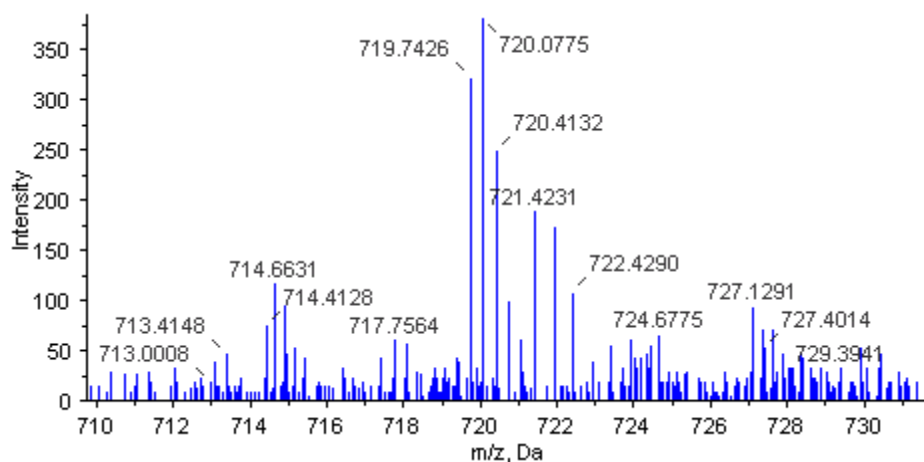



## Sequence Coverage and Matched peptides: in different color

MKTSATDPSTKKAKEAKLWGGRFEEGVTD AVER**FTESISFDK**ALYKQDIMGSRASMLAHQGLISVSD  
RDSILQGLDNIERRIEDGEFVWRDREDVHMNIEAALTDLIGEPAKKLHTARSRNDQVLTDFRLWCR**DA**  
**IDNIVAR**IEHLQVALVTLAMKNENLIVPGYTHLQRAQPILLQHLLLAYVEQLDRDAGRLLDCRQR**LNFC**  
**PLGACALAGTGLPIDR**FMTSHDLGFNAPMRNSIDAVSDRDFVLEFLSANSITAIHLSRLGEEVWLWASE  
EFGFLTSPSDSVSTGSSIMPQKKNPDPMELVRGKSARVVGDVLTLLVLCKGLPHAYNRDLQEDKEPTFDS  
TKTIIIGMLEVCAEFAQNITFNREKIKK**ALPAGHLDATTLADYLVK**KGIPFRTSHDIVGKSVALCVSK**NC**  
**QLQDLSLDEL**RSVNPVFEDEVYEFLLGVENAVKKFCSYGSTGSECVAEQLDVFWTKLQIN**TAGHK**

## Protein No.: I-692

**Protein name and Species:**

**Homogentisate 1,2-dioxygenase, putative OS=Ricinus communis**

**GN=RCOM\_1743950 PE=4 SV=1**

**Accession: tr|B9RXB8|B9RXB8\_RICCO**

**Unused ProtScore: 3.63**

**Seq Cov %: 7**

**ITRAQ Changed Ratio:**

**117: 115=E3TL: D3TL=0.09**

**116: 114=E5TL: D5TL=0.19**

**Annotated typical Precursor MS Region:**

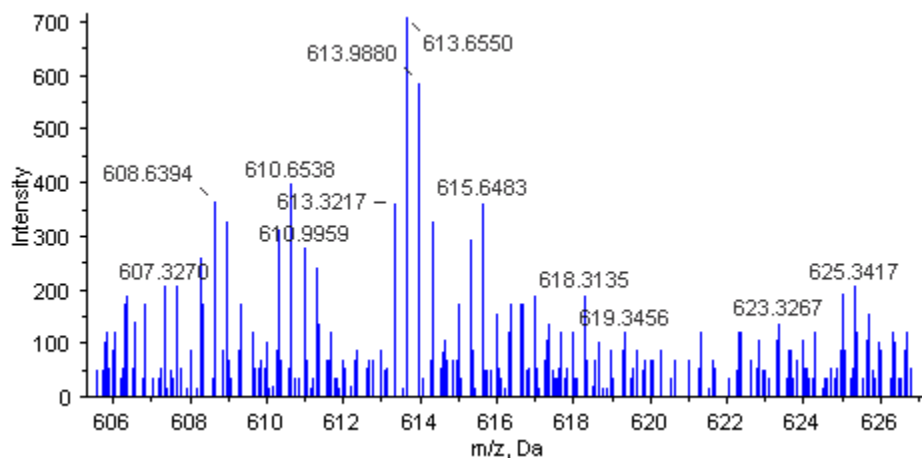

## Sequence Coverage and Matched peptides: in different color

MDNPKSNGRDFPSDDHDYLSGFGNTFESEAIHGALPRGQNSPLICPYGLYAEQISGSSFTSPRKLSQRS  
WLYRIKPSVTHEPFKPRVPSHGKIVSEFDKTDSCSTTPTQLRWKPVDIPDSPTDFIDGLFTICGAGSSF  
LRHGFAIHMYTANKSMGNALCNADGDFLVVPQEGRLWITTECGKLQVSPGEVVVLPQGFRFAVDLPDG  
PSRGGYVAEIFGTHFQLPDLGPIGANGLAAPRDFLVPKAWYEEGPCPGYTI IQKFGGELFTAKQDFSPFN  
VVAWHGNFVVPYKYDLKKFCPYNTVLIHSDPSINTVLTASTDKPGVALLDFVIFPPRWLVAEHTFRPPY  
YHRNCSEFMGLIYGGYEAKADGFVPGGASLHSCMTPHGPDTKTYEATIARGNDAGPSRITDTMAFMFE  
SCLIPRICLWAVESPFIDHDYYQCWIGLKSHFSHGADSKNGGI

## Protein No.: I-694

**Protein name and Species:**

**3-isopropylmalate dehydratase, putative OS=Ricinus communis**

**GN=RCOM\_1217310 PE=4 SV=1**

**Accession: tr|B9SQS5|B9SQS5\_RICCO**

**Unused ProtScore: 3.61**

**Seq Cov %: 8.2**

**ITRAQ Changed Ratio:**

**117: 115=E3TL: D3TL=0.48**

**116: 114=E5TL: D5TL=0.67**

**Annotated typical Precursor MS Region:**

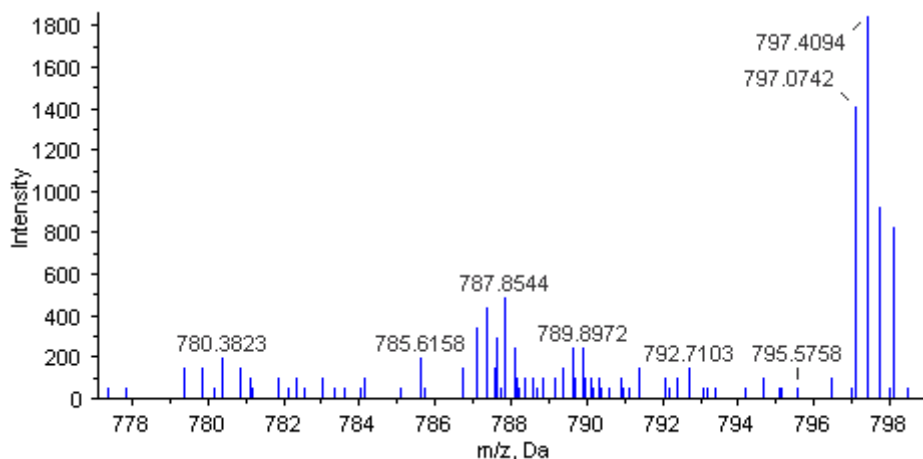

## Sequence Coverage and Matched peptides: in different color

MASSAITSPSSSFITKKDLGLSAFSSQSSPFYSIPKCKKSIKSKVVSVMAPQQSERTPATTGSVKTAMT  
MTEKILARASEKSQLSPGENVWVNVLDVLMTHDVCGPGSIGIFKREFGQATVWDREKIVIIPDHYIFTT  
DERANRNVDILRDFCQEQNVKYFYDIKDLSNFKVNPDYKGVCHVALAQEGHCRPGEVLLGTDSTCTAG  
AFGQFATGIGNTDAGFVLGTGKLLKVPPTLRVMDGEMPDYLLAKDLILQIIGEISVSGATYKSMEFV  
GTTVESLNMEERMTLCNMVVEAGGKNGVIPSDSTTFKYLEDKTSVPPFEPVYSDEKARFLSEYRFDVSKL  
EPLVAKPHSPDNCALARECKDVKIDRVYIGSCTGGKTEDFMAAAKVFLLASGKKVKVPTFLVPATQKVWM  
DVYSLPVPGSGGKTCSQIFEEAGCDTPASPCGACLGPKDTYARMNEPMVCVSTTNRNFPGRMGHKEG  
QIYLASPYTAAASALTGYVTDPREFLQ

# Protein No.: I-700

Protein name and Species:

Protein-L-isoaspartate O-methyltransferase OS=Ricinus  
communis GN=RCOM\_1508020 PE=3 SV=1

Accession: tr|B9RAR0|B9RAR0\_RICCO

Unused ProtScore: 3.54

Seq Cov %: 15.2

ITRAQ Changed Ratio:

117: 115=E3TL: D3TL=0.61

116: 114=E5TL: D5TL=0.87

Annotated typical Precursor MS Region:

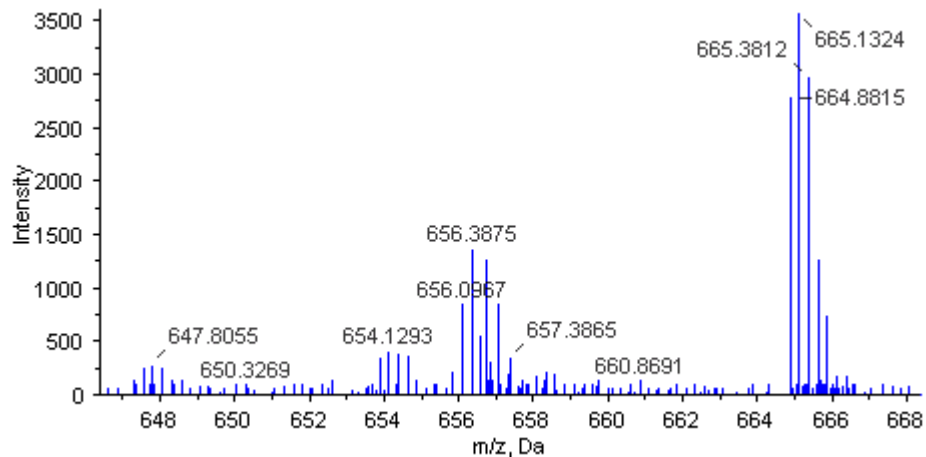

Sequence Coverage and Matched peptides: in different color

MPISPVIAYGCRNYYYYVPVPLKRILTYSEFRKNHLHHNNSHRCF**LLLLR**TTTNFHPQFSTFNLI PRKLY  
CPFTGNSLFFRMERFFAGSGINKNKAMVEHLQHYGVISSRK**VVEVMETIDR**ALFVPDGTQAYVDSMPPI  
GYNATISAPHMHATCLQLLEEHLKPGMHALDVGSGTGYLTA CF AIMVGPQGR**AVGVEHIPELVTSSVK**N  
ILK**SAAAPLLK**EGFLSVHIGDGRQGWPEFAPYDAIHVGAAAPEIPQALIDQLKPGGR**MVIPVGNIFQDL**  
**KVIDKNQDGSISVR**SETSVRYVPLTSRDAQLRG

# Protein No.: I-703

**Protein name and Species:**

**Heat shock protein 17.5 cytosolic class II OS=Jatropha curcas**

**PE=2 SV=1**

**Accession: tr|D5JG84|D5JG84\_9ROSI**

**Unused ProtScore: 3.53**

**Seq Cov %: 19.8**

**ITRAQ Changed Ratio:**

**117: 115=E3TL: D3TL=1.50**

**116: 114=E5TL: D5TL=1.34**

**Annotated typical Precursor MS Region:**

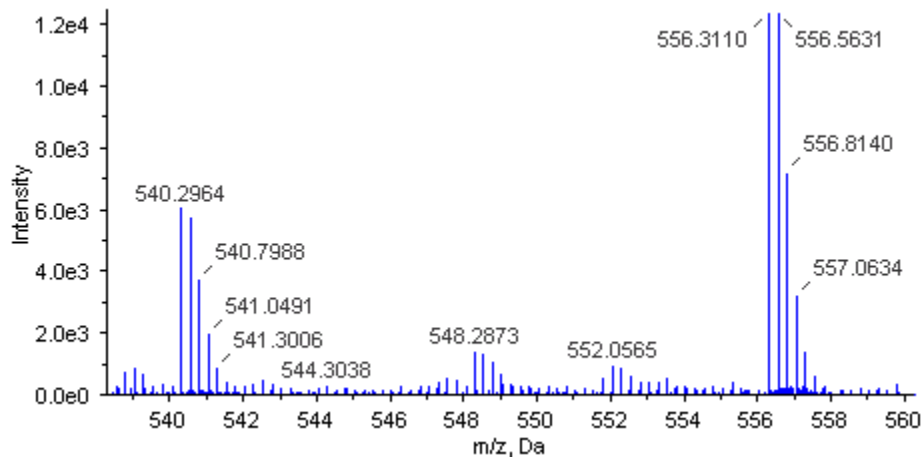

**Sequence Coverage and Matched peptides: in different color**

MDVRFVGLDSPLLHTLQQMMDIGDDADHK**SFNAPTR**TYVRDAK**AMASTPADVK**EYPNSYVF**IIDMPGLK**  
**SGDIK****QVEDDNVLLISGER**KREEEKEGAKYVRMERRVGKLMRKFALPENANTDAISAVCQDGVLTVTV  
QKLPPPEPKPKKTIEVKIA

## Protein No.: I-704

**Protein name and Species:**

**Putative uncharacterized protein OS=Vitis vinifera**

**GN=VIT\_13s0067g03420 PE=4 SV=1**

**Accession: tr|D7T494|D7T494\_VITVI**

**Unused ProtScore: 3.52**

**Seq Cov %: 3**

**ITRAQ Changed Ratio:**

**117: 115=E3TL: D3TL=0.10**

**116: 114=E5TL: D5TL=0.35**

**Annotated typical Precursor MS Region:**

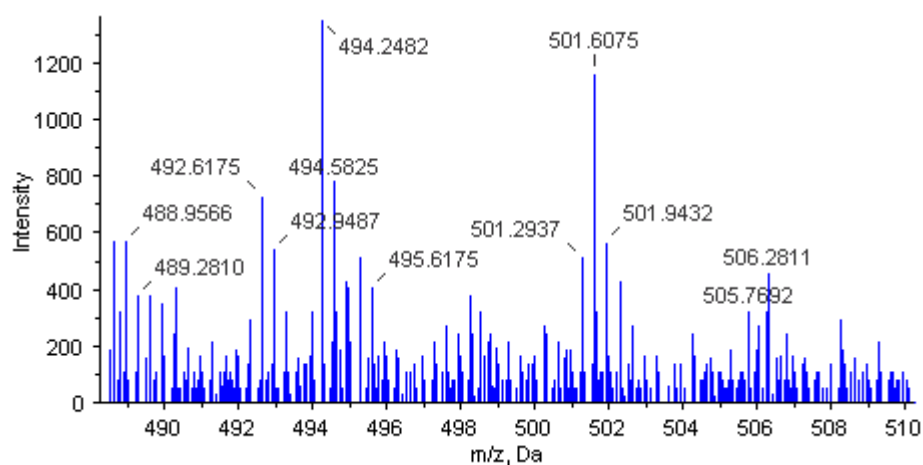



## Sequence Coverage and Matched peptides: in different color

MKPKAVVNPLVTFEHKRDAYGFAVRPQHLQRYR**EYANIYKEEEER**SERWNIFFLEQQAESAQLPVNGLS  
ADEHNKALHGEATEKDVDANPEKVVQKLGSDSNEN**VTEK**ESQGVAETKTHRIQIWTEIRTSLHAI EEM  
MSTRVKKR**RDSKNEKETGLGK**HHAPVEEARSLKGVSEEDSEDEFYDVERSDPVQDVPSSDSSNASATA  
SAGDVVTLETSFPWKEELECLVRGGVPMALRGELWQAFVGVKARRVERYQ**ELLASEHNVGNKVEQDSS**  
QTDSLTDGPIKDSL**TVTEK**WKGQIEKDLPRTFPGHPALDEDEGR**NALRRLLTAYAR**HNP SVGYCQAMNFF  
AGLLLLLLMPEENAFWALMGIIDDYFDGYYSEEMIESQVDQLAFEDLVRERLPKLVNHLDFLGVQVAWVT  
GPWFLSIFMNMLPWESVLRVWDVLLFEGNRVMLFKTALALMELYGPALVTTKDAGDAVTLQLAGSTF  
DSSELVLTACMGYQNVNEARLQELRDKHRAAV**IAAVEER**SKGLRAWRDSKGLAHKLYGFKHDPGSLAMD  
ANQTEQVVD SQANGDMSHMEPGSANVDGFLIGLTENVEIDSV**PDLQEQVRWLKVELCKLLEEKRSALLR**  
AEELETALMEMVKQDNRRQLSAR**VEQLEQEVSELR**QALADKQEQEHAMLQVLVRVEQEQKLTEDARRFA  
EQDAAAQRYAAQVLQEK**YEEAITSLAQMEK**RVVMAETMLEATLQYQSGQVKAQPSPRSHQDSSSARSNQ  
ETPQELPTRKIGLLSRPFALGWRDRNKGKPASEEVSDAKPTNEVENPSAQQVES**PSTQQKDANGHEVQE**  
KQ

## Protein No.: I-708

**Protein name and Species:**

**Hydrolase, hydrolyzing O-glycosyl compounds, putative  
OS=Ricinus communis GN=RCOM\_0272270 PE=4 SV=1**

**Accession: tr|B9T139|B9T139\_RICCO**

**Unused ProtScore: 3.46**

**Seq Cov %: 6.5**

**ITRAQ Changed Ratio:**

**117: 115=E3TL: D3TL=16.00**

**116: 114=E5TL: D5TL=3.72**

**Annotated typical Precursor MS Region:**

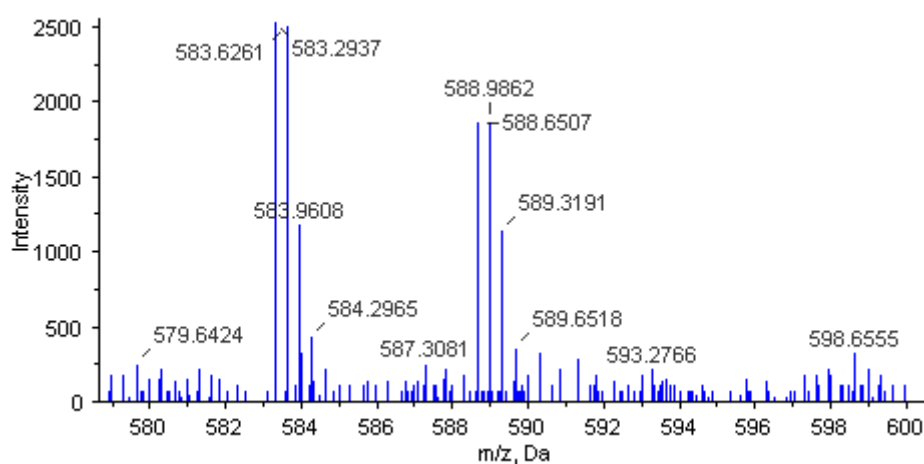

## Sequence Coverage and Matched peptides: in different color

MAWSLQKSEIKPTVRKLEKKGGDRQLDAMTIKPAVRISDRKLIIVKDRTIILTGLQDNVIATSGSSSSPVE  
GVFIGAVFDEENSRHVVPLGTLRDVRFMACFRFKLFWMAQKMGDHGRDIPLETQFLMMETKDGSQLSD  
GGNEENQIIYTVFLPLIEGSFRAQLQGNDNDELELCLESGD**VDTK**AASFTHPLFIHAGTDPFGTLTEAV  
**RAVK**LHLKSFQRHEKKLPALIDYFGWCTWDAFYQEVTQEGVEAGLKSLSSEGGTLPKFVIIDDGWQSVG  
GDPQEDDEDKQPQLLRL**IGIK**ENEFKFRKKDDPT**VGIK**NIVNIAKEKYGLKYVYVWHAITGYWGGVRPGV  
KEMEEYGSLMKYPKVSEGVLENEPTWRDVLAVQGLGLMNP**KAVYK**FYNELHNYLASAGIDGV**KVDVQC**  
**ILETLGAGLGGR**VEITR**QYHQALDASVAR**NFPDNGCIACMSHNTDALYCSKQTAVVR**ASDDFFPR**DPVS  
HTIHIAAVAYNSVFLGEFMQPDWDMFHSHPAAEYHASAR**AISSGGPVYVSDEPGK**HDFNVLKK**LVLDPG**  
**SILRARLPGRPTR**DCLFSDPARDGISLLKIWNMNKHTGVLGVYNCQGAAWNCVERKNTFHETKSEALTG  
AIKGRDVHLIAEAATDSNWNGDCAVYCHQTAELTTVPYNASLPVSLKVLHEEIFTLTPIKVLAPGFSFA  
PLGLIAMYNAGGAIIEGLKYEVKGVKLVLELDEGYKGENSTVSDERVENISSELV**GKICMEVKGCGK**FGAY  
**SSTK**PRMCIVDSNIAEFYDSSSGLVTFNLDNLAEEGRLHLVEVEV

## Protein No.: I-710

**Protein name and Species:**

ATP-citrate synthase, putative OS=Populus trichocarpa

GN=POPTRDRAFT\_827990 PE=4 SV=1

**Accession:** tr|B9N432|B9N432\_POPTR

**Unused ProtScore:** 3.44

**Seq Cov %:** 17.3

**ITRAQ Changed Ratio:**

**117: 115=E3TL: D3TL=0.56**

**116: 114=E5TL: D5TL=0.61**

**Annotated typical Precursor MS Region:**

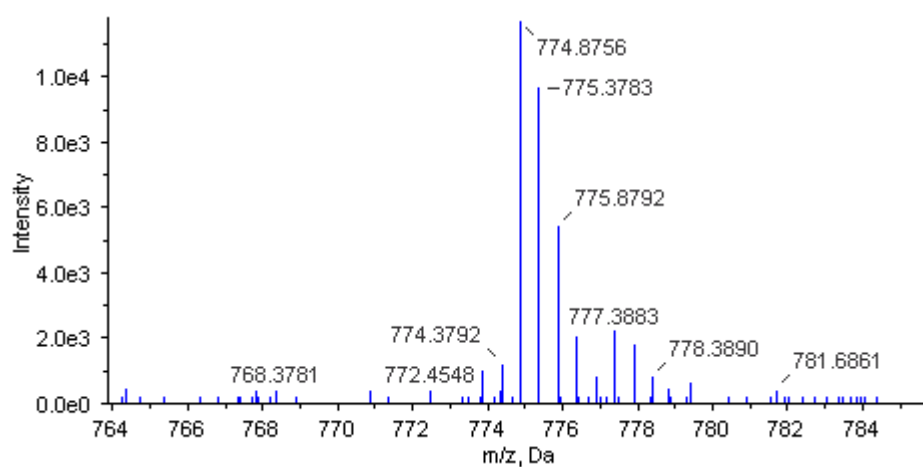

## Sequence Coverage and Matched peptides: in different color

MARKKIREYDSKRLLEHLKRLSGIDLQICSAQVTEGTDFTLTKNEPWL**SSTKLVVKPDMLFGK**RGKS  
GLVALNLDLAQV**AEFVK**ARLGAEVEMGGCKAPITTFIVEPFVPHDQEFYISIVSERLSTISFSECGGI  
EIEENWDKVKTIIFLPTEKPMLEACAPLIATLPLEIRGKIGDFIISVFSVFQDLDFSFLEMNPFLLVNG  
**EPYPLDMRGELDDTAAFK**NFKK**WGNVEFPLPFGR**VLSSTESFIHSLDEKTSSSLK**FTVLNPK**GRIWTMV  
AGGGASVIYADTVGDLGY**ASELGNIAEYSGAPNEDEVLQYARVVIDCATSDPDGR**KRALLIGGGIAN**FT**  
**DVAATFNGIIR**ALREKESKLKAARMHIYVR**RGGPNYQTGLAK**MR**TLGEELGVPLEVYGPEATMTGICK**Q  
AIDCIMSTA

# Protein No.: I-713

**Protein name and Species:**

**Potassium channel beta, putative OS=Ricinus communis**

**GN=RCOM\_1021600 PE=4 SV=1**

**Accession: tr|B9RWM3|B9RWM3\_RICCO**

**Unused ProtScore: 3.44**

**Seq Cov %: 7.6**

**ITRAQ Changed Ratio:**

**117: 115=E3TL: D3TL=12.13**

**116: 114=E5TL: D5TL=2.13**

**Annotated typical Precursor MS Region:**

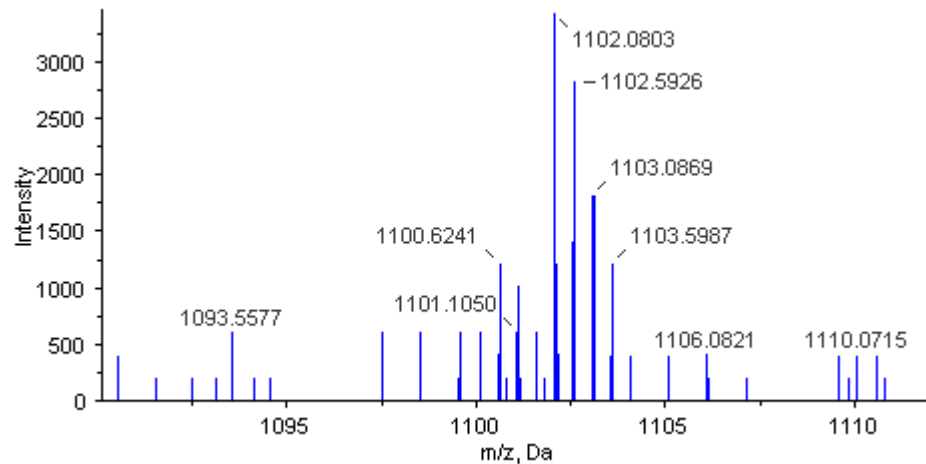

**Sequence Coverage and Matched peptides: in different color**

MQYKNLGRSGLKVSQLSYGAWVSFGNQLDVKEAK**SLIQCCR**DHGVNFFDNAEVYANGR**AEEIMGQAIRE**  
LGWKRSDIVVSTKIFWGGSGPNDKGLSRKHIVEGTKASLKRLDMDYVDVIYCHRPDSSTPIEETIRAMN  
HVIDKGWAFYWGTSSEWSAQQITEAWGIAER**LDLVGPIVEQPEYNLLSR**HKVSESEYLPLYTNYGLGLTTW  
SPLASGVLTKYSRGAIPDPSR**FALENYK**NLASRSLIDDVLKKNGLKPIADELGVPLSQLAIWCAAN  
PNVSSVITGATK**ESQIQENMK**AIDV**IPLLTPAVMEK**IEAVVQSKPKRPDSYR

## Protein No.: I-714

**Protein name and Species:**

**Aldehyde dehydrogenase family 7 member A1 OS=Euphorbia  
characias PE=2 SV=1**

**Accession: tr|Q5EBY6|Q5EBY6\_EUPCH**

**Unused ProtScore: 3.43**

**Seq Cov %: 11.2**

**ITRAQ Changed Ratio:**

**117: 115=E3TL: D3TL=0.59**

**116: 114=E5TL: D5TL=0.68**

**Annotated typical Precursor MS Region:**

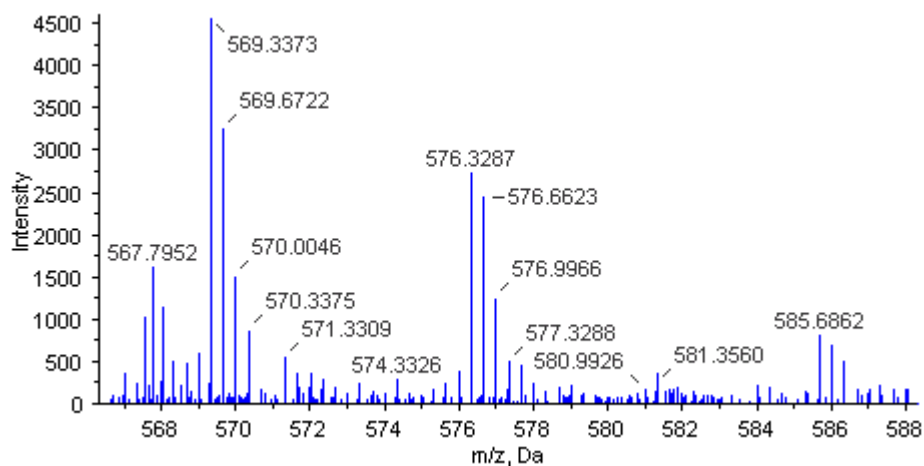

## Sequence Coverage and Matched peptides: in different color

MGFARKEYEFLSEIGLSERNLGCYVNGTWKANGPVVTTSPANNQAIAEVVEGSIEDYEEGMKACSEAA  
KIWMQVPAPKRGDIVRQIGDALRGKLEHLGR LVSLEMGK ILAEGIGEVQEIIDMCDFCVGLSRQLNGSI  
IPSERPNHAMLEMWNPLGIVGVITAFNFPCAVLGWNACIALVCGNCAVWKGAPTTPLMTIATTKLVAEV  
LERNNLPLAIFTSFCGGADIGQAIKDTR IPLVSFTGSSK VGLMVQQTVNQRYGKSLEELSGNNAIIVM  
DDADIPLAARSILFAAVGTAGQRCTTCRRLILHEKIYDTVLDQLLKSQVKIGDPLEKGTLLGPVHTA  
ESRKNFEKGI ELIKSQGGK ILTGGSVIESEGNVQPTIVEISSKAEVVK EELFAPVLYVMK FQTL EEAI  
EINNSVPQGLSSSIFTRRPDVIFKWLGPHGSDCGIVNVNIP TNGAEIGGAFGGEKATGGGREAGSDSWK  
QYMRASTCTINYGSELPLAQGINFG



# Protein No.: I-716

**Protein name and Species:**

**Isoflavone reductase, putative OS=Ricinus communis**

**GN=RCOM\_1594880 PE=4 SV=1**

**Accession: tr|B9R7W5|B9R7W5\_RICCO**

**Unused ProtScore: 3.43**

**Seq Cov %: 20.1**

**ITRAQ Changed Ratio:**

**117: 115=E3TL: D3TL=0.23**

**116: 114=E5TL: D5TL=0.48**

**Annotated typical Precursor MS Region:**

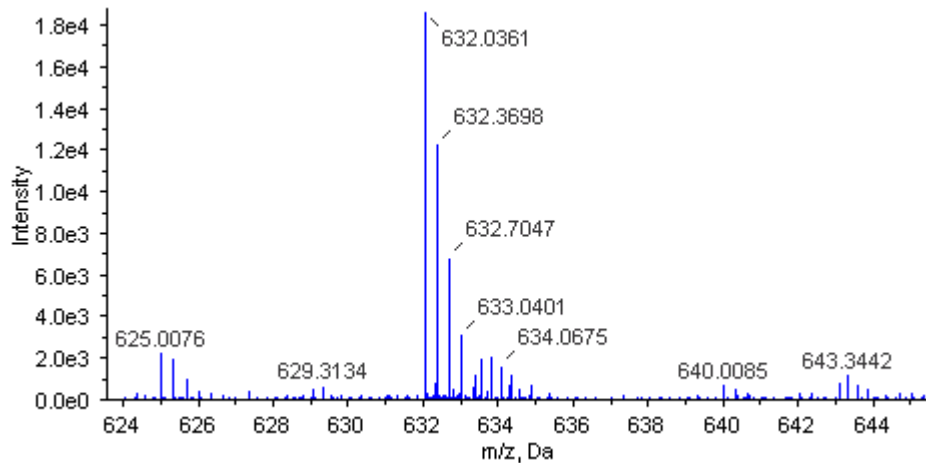

**Sequence Coverage and Matched peptides: in different color**

MADTSK**ILIIIGGTGYIGK**FIVEASAKAGLPTFVLI**RE**STVSDPVK**GK**I**VENFK**NLGVTLLHGDLYDHES  
**LVK**AIKQADVVISITL**GALQ**LADQTKVIAAIKEAGNVK**R**FFPSEFGTDVDH**VH**AVEPAK**SA**FETKAQIRR  
AIEAEGIPYTYAVCN**YFAS**LMIP**LLLR**PAGDK**VTILGDGNVK**AIF**SMEQ**DIALYTIKAVDDPRTL**NK**TL  
FVNPPMNILTYNELVALEEKKTGKTIEKNYVPEEKVLQDIQ**TVP**MPFNIGLAINHCVF**IK**GDQTNFEID  
PSWGVEASQLY**PD**VKYTTIAEYFDQTA

## Protein No.: I-717

**Protein name and Species:**

glycine-tRNA ligase 1, mitochondrial OS=Populus trichocarpa

GN=POPTRDRAFT\_830916 PE=3 SV=1

**Accession:** tr|B9GZ19|B9GZ19\_POPTR

**Unused ProtScore:** 3.42

**Seq Cov %:** 10.9

**ITRAQ Changed Ratio:**

**117: 115=E3TL: D3TL=0.61**

**116: 114=E5TL: D5TL=0.79**

**Annotated typical Precursor MS Region:**

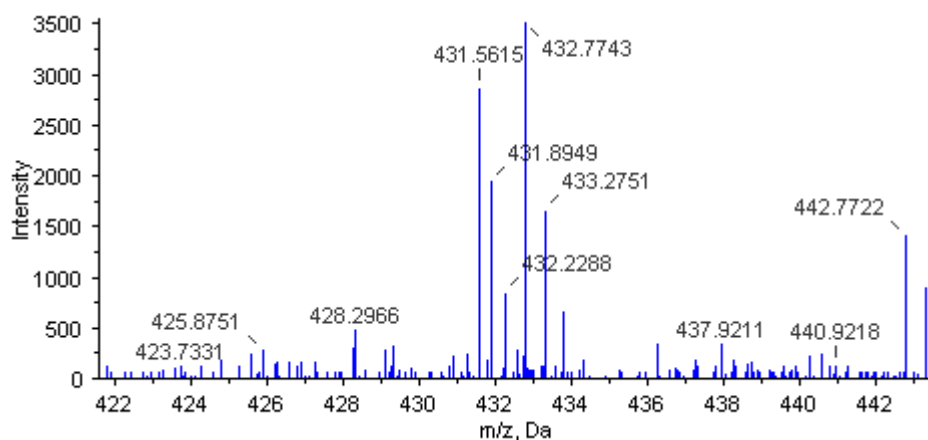

## Sequence Coverage and Matched peptides: in different color

MAASEDSLRRALAEKQSSIESQGN TVRALKASNAEKATVDEAIEKLNALKLDKSVMEKQLQAAVNGNGP  
DGSVNSEAFRQAVVNTLERRLFYIPSEK IYRGVAGLYDYGPPGCAVKSNVLSFWRQHFVLEENMLEVDC  
PCVTPEVVLKASGHVDFDTLDMVKDEKTGTCCRADHLLKDFCNEKI QKDLSISAEKAAELKHVLAAILDD  
LSAEELGAKIK EYGITAPDTKNPLSDPYPFNLMFQTSIGPSGLSPGYMRPETAQGI FVNFKDLYYYNGN  
KLPFAAAQIGQAFRNEISPRQGLLRVREFTLAEIEHFVDPEYKSHPKYSEVADLEFLMFPR ELQISAQS  
AKKIQLGEAVSKGIVNNETLGYFIGRVYLFLETR LGIDKDRLRFRQHLANEMAHYAADCWDAEIESSYGW  
IECVGIADRSAYDLHAHSEKSGVPLVAHEKFSEPK EVELVIAPVKKELGLAFKGNQKKVVEALEAMNE  
KEALDMKASLETKGEVEFYVCTLGKVTIKKNMVSISKEKKKEHQRTFTPSVIEPSFGIGRIIYCLYEH  
SFYMRPSKAGDEQLNVFRFPPLVAPIKCTVFPLVQNQQYEDVAKIISK TLTAAGISHKIDITGTSIGKR  
YARTDELGVPFAITVDSISSVTIRERDSKDQIRVDVEEAAPVVKSVTDGHK TWADVWANFPHHSSGSVE  
D

# Protein No.: I-718

**Protein name and Species:**

**40S ribosomal protein S25-1, putative OS=Ricinus communis**

**GN=RCOM\_1447530 PE=4 SV=1**

**Accession: tr|B9RH67|B9RH67\_RICCO**

**Unused ProtScore: 3.42**

**Seq Cov %: 20.4**

**ITRAQ Changed Ratio:**

**117: 115=E3TL: D3TL=2.07**

**116: 114=E5TL: D5TL=0.91**

**Annotated typical Precursor MS Region:**

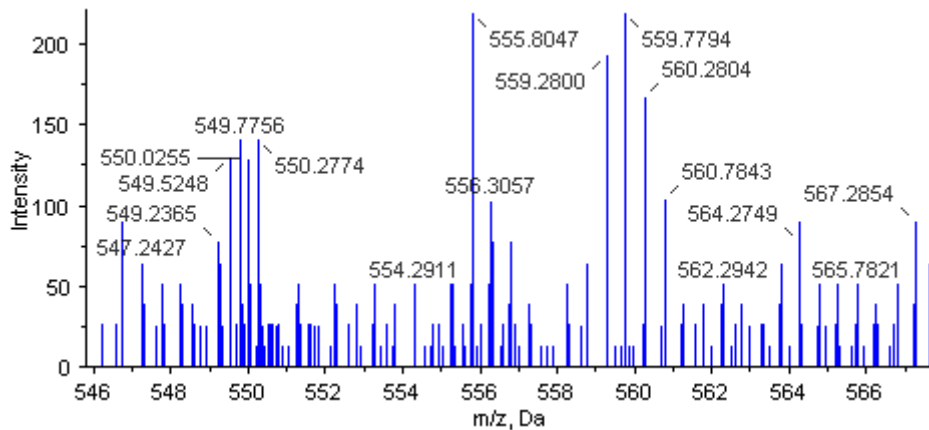

**Sequence Coverage and Matched peptides: in different color**

MAPKKDKAPPPSSKPAKSGGGKQKKKWSKGKQKEK**VNNMVLFDQATYDKLLSEAPKYKLITPSILSDR**  
LR**VNGSLARR**AIRELMARGLIRMVSAH**ASQQIYTR**ATNT

## Protein No.: I-720

Protein name and Species: **clathrin heavy chain 1 [Vitis vinifera]**

OS=**Vitis vinifera** GN=**VIT\_13s0067g01290** PE=4 SV=1

Accession: **tr|A5ACP0|A5ACP0\_VITVI**

Unused ProtScore: **3.4**

Seq Cov %: **15.1**

ITRAQ Changed Ratio:

**117: 115=E3TL: D3TL=1.63;**

**116: 114=E5TL: D5TL=1.20**

Annotated typical Precursor MS Region:

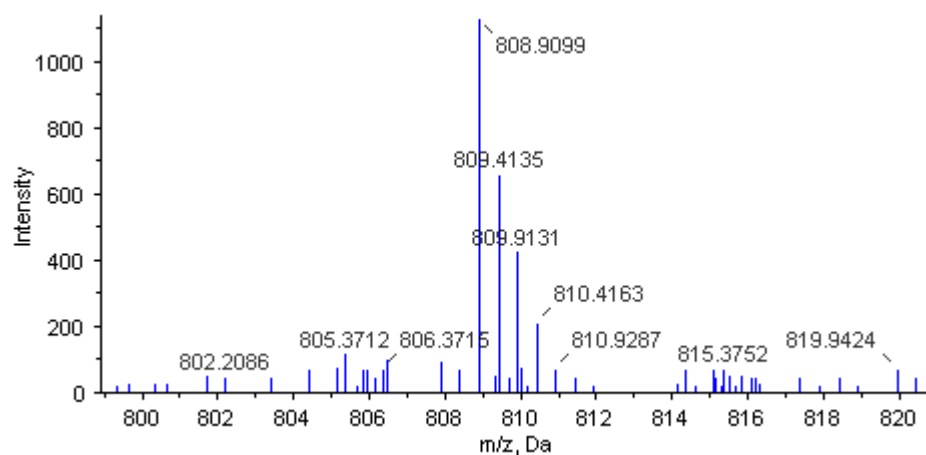

## Sequence Coverage and Matched peptides: in different color

MAAANAPITMK EVLTLPSLGI SPQF ITFTHTVME SDKYLCVR ETAPQNSVVIIDMNMMPQLRRPITAD  
SALMNPNTIRILALKAQLPGTTQDHLQIFNIEMK AKMKS YQMPEQIVFWKWITPK MLGLVLTQTSVYHWSI  
EGDSEPVKMFER TANLVNNQIIN YRCDPSEKWLVLIGIAPGSPERPQLVKGNMQLF SVEQHR SQALEAH  
AASFATFK VPGNDQPCTLIGFATK SFNAGQIVSK LHVIELGSNPGKPGFTKKQADLFFPPDFADDFPVA  
MQISHKYGLIYVITKLGLLFVYDLESASAVYRNRI SPDP IFLTAEATSIGGFYAINRRGQVLLLATVNEA  
AIVPFVSGQLNNELELAVNLAK RGNLPGAENLVVQR FQELFAQTK YKEAAELAAESPQGILR TPDTVAKF  
QSVPMQSQGTPPLLQYFGTLLTRGK LNAFESLELSRLVVNQNK NLLLENWLAEDKLECSEELGDLVKTV  
DTD LALKIYIKARATPKVVA AFAER REF D KIL IYSKQVGYTPDYLFLLQTI LRSDPQGA VNFALMMSQM  
EGGCPIDFNTITDLFLQRNLIREATAF LLDV LKPNLPEHGFLQTKVLEINLVTYPNVADAILANGMFSH  
YDRPR IAQLCEKAGLYVRALQHYTELPDIK RVI VNT HAI EPQALVEFFGTLSREWALECMK D L L L V N L R  
GNLQIIVQTAKEYSEQLGVDQCVK LFEQFK SYEGLYFFLGSYLSSESSEDPDIH FKYIEAAAK TGQIKEVE  
RVTR ESNFYDAEK TKNFLMEAKLPDAR PLINVCDFG FV PDLTHYLYTNMLRYIEGYVQK VNPSNAPL  
VVGQLL DDECPEDFIKGL ILSVR SLLPVEPLVDECEKR N R L R L L T Q F L E H L V S E G S Q D V H V H N A L G K I I  
IDSNNNPEHFLTTNPYYDSR VVGKYCEK RDPTLAVVAYR RGQCDEELINVTNK NSLFLKLQARYVVERMD  
SDLWEKVLDPDNDYRRQLIDQVVSTALPESKSPEQVSAAVK AFMTADLPHELIELLEKIVLQNSAFSGN  
FNLQNL LIL TAIKADPSR VMDYINR LDNFDGPAVGEVAVEAQLFEEAF AIFKKNLNVQAVNVLLDNIQ  
SIER AVEFAFRVEEDAVWSQVAKAQLR EGLVSDAIESFIR ADDATQFLDVIRAAEDANVYHDLVR YLLM  
VRQKAKEPKVDSELIYAYAK IDRLGEIEEFILMPN VANLQNVGDR LYDEALYEAAK IIFAFISNWAKLA  
CTLVKLRQFQGA VDAARK ANSSKTWK EVCFACVDAEEFR LAQICGLNII IQVDDLEEVSDYYQNRGCFN  
ELISLMESGLGLERAHMGI FT ELGVL YARYRPEKLM EHIK LFS'TRLNIPK LIRACDEQQHWKELTYLYI  
QYDEFD NAATTIMNHSPDAWDHMQFKDVAVK VANVELYYK AVHFY LQEHPDLINDLLN VLALRVDHTRV  
VDIMRKAGHLHLVKPYMVA VQSNVSAVNEALNGIYVEEEDYDRLR ESIDMHDNFDQIGLAQK IEKHEL  
LEMRRVAAYIYK KAGRWKQSIALSKKDNLYKDAMETASQSGDRELAEELLVYFIEKGGKKECFASCLFVC  
YDLIRPDIALELAWINNMVDFALPYLLQFIREYAGK VDELVKDK LEALNEVK AKEKEEKDVIAQQNMYA  
QLLPLALPAPPMPGMGGAGMAGGFVPPPMGSMGMPMPMPFGMPMGTY

## Protein No.: I-723

**Protein name and Species:**

**Unknown protein 1 (Fragment) OS=Vitis rotundifolia PE=1**

**SV=1**

**Accession: sp|P86104|UP01\_VITRO**

**Unused ProtScore: 3.4**

**Seq Cov %: 100**

**ITRAQ Changed Ratio:**

**117: 115=E3TL: D3TL=0.11**

**116: 114=E5TL: D5TL=0.58**

**Annotated typical Precursor MS Region:**

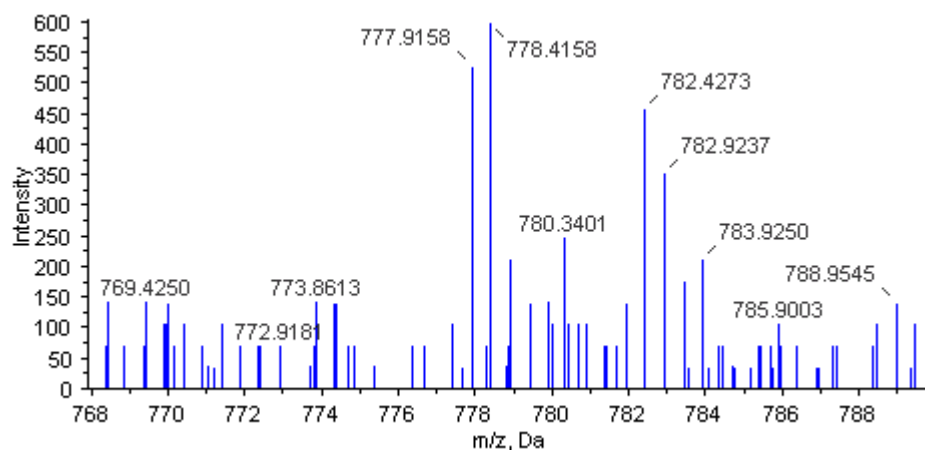

**Sequence Coverage and Matched peptides: in different color**

**TNAENEFVTIKK**

## Protein No.: I-729

**Protein name and Species:**

**5-methyltetrahydropteroyltriglutamate--homocysteine**

**methyltransferase, putative OS=Ricinus communis**

**GN=RCOM\_0952830 PE=3 SV=1**

**Accession: tr|B9RQ33|B9RQ33\_RICCO**

**Unused ProtScore: 3.37**

**Seq Cov %: 16.8**

**ITRAQ Changed Ratio:**

**117: 115=E3TL: D3TL=0.62**

**116: 114=E5TL: D5TL=1.09**

**Annotated typical Precursor MS Region:**

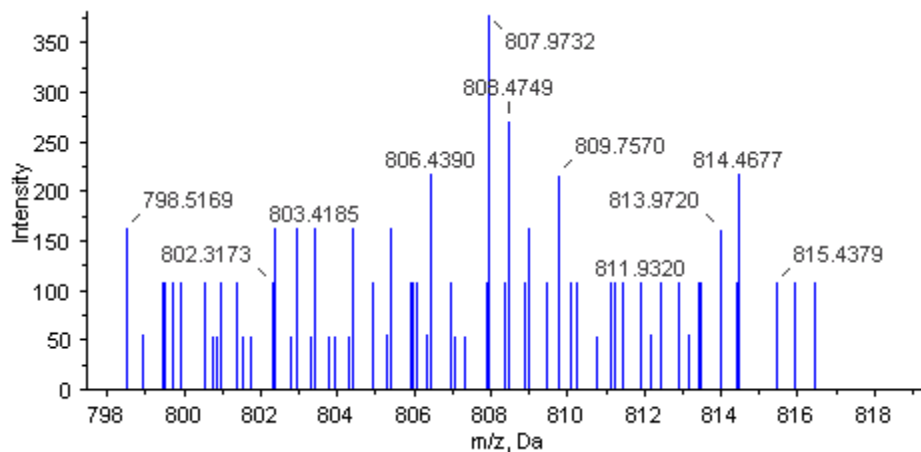



## Sequence Coverage and Matched peptides: in different color

MRQVSLNVLAPFTSFRVISLPPFSSSTNPSSLSFLPFSFHFPSSLSSSTSFRAMASHIAGYPRMGPKRELK**F**  
**ALESFWDGKSSAEDLQK**VAAELRASIWKQMADAGTKFIPSNTFSYDQVLDTTAMLGAVPPRYGWDGGE  
IGFDVYFSMAR**GNASVPAMEMTK**WFDTNHYHYIVPELGPEVK**FSYASHK**AVDEYKEAK**ALGVE**TV**PVLVG**  
**PVSLLLLSK**PAKGVEK**SFSLLSLIDR**ILPIYKEVIAELKAAGARWIQFDEPKLVMDLDSHELQAF'TNAY  
SELEASLSGVHVVVETYFADLPA**EAYKTLTSLK****GVTGF****GFDLVR**GTK**TLDLIK**GGFP**TGK****FLFAGVVDG**  
**RNIWANDLASSLDTLHALES**AVGKDKVVVSTSCSLLHTAVDLANEPKLDKEIK**SWLAF****AAQK****VLEVNAL**  
**AK**ALAGNR**DEAFFSSNALAHASR**KSSPR**VTNEAVQ****AAAAALK****GSDHRR**ATNVSARLDAQ**QK****KLNLPI****L**  
**TTT**IGSFP**Q****TLDLRR**VRREYKAKK**I****SEDDYVK**AIKEEISKVVKIQEELDIDVLVHGEPERNDMVEYFGE  
QLSGFAFTANGWVQSYGSR**CVKPP****IYGDVSR**PKAMTVFWSSMA**Q****SMTSR**PMK**GMLTGPVTILNWSFVR**  
NDQPRHETCYQIALAIKDE**VEDLEKAGITVIQ****IDEAALR****EGLPLR**KSEHAFYLDWAVHSFRITNCGVED  
TTQIHTHMCYSNFNDIIHSIINMDADVITIENSRSDEK**LLSVFR**EGVK**YGAGIGPGVYDIHSPRIPSTE**  
**EIADR**INKMLAVLES**NILWVNPDCGLK**TRK**YSEVKPALS****NMVAATK**ILRTQLASAK

# Protein No.: I-732

**Protein name and Species:**

**Catalytic, putative OS=Ricinus communis GN=RCOM\_0300260**

**PE=4 SV=1**

**Accession: tr|B9T676|B9T676\_RICCO**

**Unused ProtScore: 3.37**

**Seq Cov %: 8.5**

**ITRAQ Changed Ratio:**

**117: 115=E3TL: D3TL=4.02**

**116: 114=E5TL: D5TL=11.62**

**Annotated typical Precursor MS Region:**

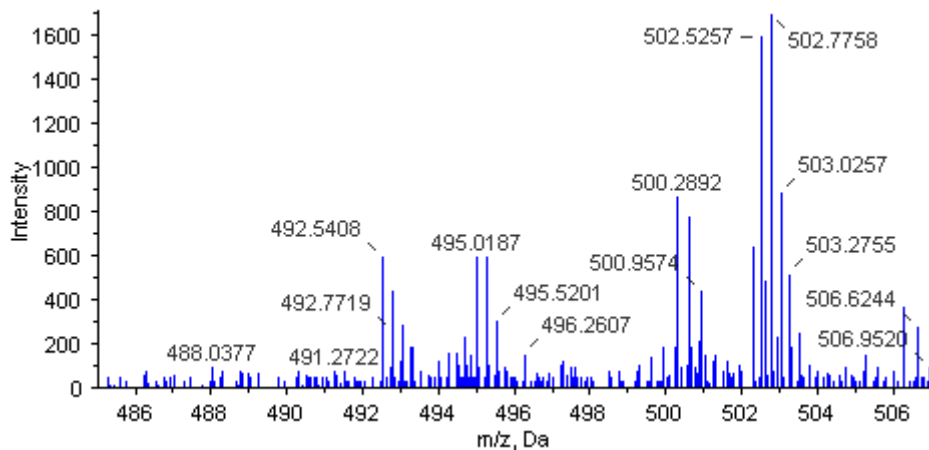

**Sequence Coverage and Matched peptides: in different color**

MEYEGNQQHVLKYECLLFVDDTLYPLRSGLSQHVTKNIQEYMVQKLGIEESKVAELCVSLYKLYGTT  
LAGLRAIGHNIDYDDFHSFVHGRLPYD**IVKPD**PVLRNLLHSLPVRKIVFTNADKTHASRVLSRLGLEDC  
FEGILSFETLNNTTKGNESVNEDENGVFDINEYTAAPNAGLALPRSPVVCKPFEDAFEQVFKITSINPQ  
R**TLFFD****SIR**NLQTKRKLGLTTVWVGSSHR**TEGV****DYALESIHNIK**EALPELWDANEKSDGVRYSGRVAI  
ETSVKA

## Protein No.: I-735

**Protein name and Species:**

**Phagocytic receptor 1b [Vitis vinifera] OS=Vitis vinifera**

**GN=VIT\_01s0011g06540 PE=4 SV=1**

**Accession: tr|D7T8E1|D7T8E1\_VITVI**

**Unused ProtScore: 3.34**

**Seq Cov %: 3.4**

**ITRAQ Changed Ratio:**

**117: 115=E3TL: D3TL=1.71**

**116: 114=E5TL: D5TL=1.29**

**Annotated typical Precursor MS Region:**

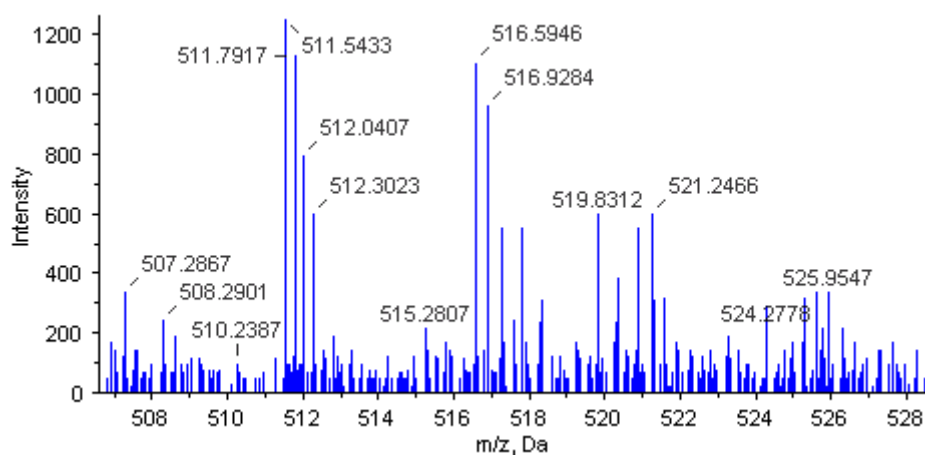

## Sequence Coverage and Matched peptides: in different color

MERAMAILVVAVLILLCGSQVRSDASSHRYKAGEAVPLYANKVGPFHNPSETYRYFDLPPFCVPAHLKEK  
KEALGEVLNGDRLVSAAPYKLDFLREKDSEVVCKKKLKKEEVAQFRAAVAKDYFQMYDDLP I W G F I G K  
VDKEGKADPSEYKYFLYKHIQFDIRYNKDRVIEINARTDPHSMVDVTDDKDVDVEFMYTVKWTETDAPF  
EKRM EKYSQTSSMPHHL E I H W F S I I N S C V T V L L L T G F L A T I L M R V L K N D F I K Y A H D E E S A D D Q E E T G W K  
YIHGDVFRYPKYKSLFAAALGSGTQLFTLTVFIFILALVGVFYPYNRGALFTALVVIYALTSGIAGYTA  
TSFYCQLEGTNWRNLLLTGCLFCAPLFLTFCFLNTVAIIYSATAALPFGTIVVIVLIWTLVTSPLLVL  
GGIAGKNSKA E F Q A P C R T T K Y P R E I P A L P W Y R S T I P Q M A M A G F L P F S A I Y I E L Y Y I F A S V W G H R I Y T I Y  
SILFIVFIILLIVTAFITVALTYFQLAAEDHEWWRSFLCGGSTGLFIYGYCLYYYYARSMSGFMQTS  
FFFGYMACICYGFFLMLGTVGFRASLLFVRHIYRSIKCE

# Protein No.: I-738

**Protein name and Species:**

**Dimethylaniline monooxygenase, putative OS=Ricinus communis GN=RCOM\_1470740 PE=4 SV=1**

**Accession: tr|B9RLT7|B9RLT7\_RICCO**

**Unused ProtScore: 3.33**

**Seq Cov %: 6.1**

**ITRAQ Changed Ratio:**

**117: 115=E3TL: D3TL=0.43**

**116: 114=E5TL: D5TL=0.25**

**Annotated typical Precursor MS Region:**

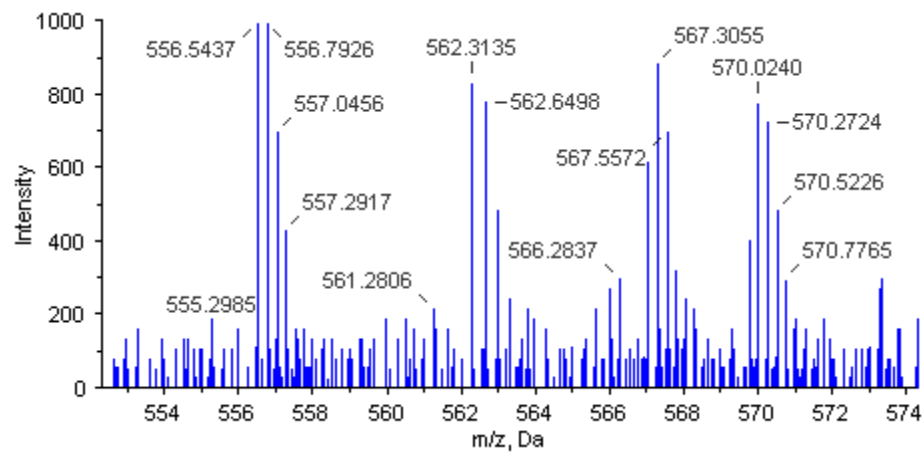

## Sequence Coverage and Matched peptides: in different color

MVSDFTRSK**NVCVIGAGPSGLVAAR**ELRKEGHRVVLLEQKDDVGGQWLYEANVESEHPLGKKKFLEVHS  
SIYASLRLVSPREIMGYTDFPFLVKKGRDMRRFPGHRELWLYLKDFCDSFGLREMIRFNTRVEYVGMLD  
YDELRNDLKVVVKSKEKDSEKAVEEVFDAVVVATGHYSHPKLPFIKGMETWKRKQMHSIYR**VPEPFRN**  
EVVVVVGNLSGQDISMELVEVAKEVHLSSKSLDVTGLSKVISKHENLHLRPQIESLEEDGRVLFADG  
SQVIADTILYCTGYTYTFPFLDTKGIVVVEDDRVGLYEHTFPPSLAPSLSFVGI PRK**IIGFPPFESQA**  
**KWIAQLLSGKRTLPSWDDMMLSIKQFYQSRDTAGIPK**HNTHTDIADFEYCDRYADHIGFPHLEEWKQLC  
LSALVNANDNLETYRDSWDDHDLLEALQSPHFTQLGVQDFIV

## Protein No.: I-740

**Protein name and Species:**

**Aminopeptidase M1 [Arabidopsis thaliana] OS=Arabidopsis thaliana GN=APM1 PE=2 SV=1**

**Accession: tr|Q8VZH2|Q8VZH2\_ARATH**

**Unused ProtScore: 3.31**

**Seq Cov %: 6.8**

**ITRAQ Changed Ratio:**

**117: 115=E3TL: D3TL=0.19**

**116: 114=E5TL: D5TL=0.38**

**Annotated typical Precursor MS Region:**

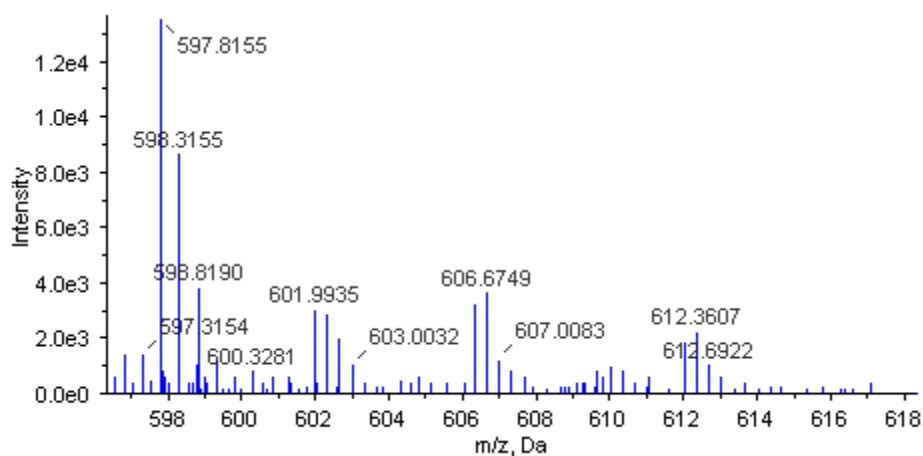

## Sequence Coverage and Matched peptides: in different color

MDQ**FKGEP**RRLPKFAVPKRYDLRLNPDLIACFTTGTVAIDLIDIVADTRFIVLNAADLSVNDASVSFTPPS  
SSKALAAPKVVLFEDEEILVLEFGEILPHGVGVLKLGFNGVLNDKMKGFYR**STYEHNGEK****KNMAVTQFE**  
**PADAR**RCFPCWDEPACKATFKITLLEVPTDLVALSNMPIMEEKVNGNLKIVSYQESPIMSTYLVAIVVGL  
FDYVEDHTSDGIKVRVYCQVGKADQKGFAL**HVGAK**TLDLFKEYFAVPYPLPKMDMIAIPDFAAGAMENY  
GLVTYRETALLYDEQHSAASNQRVATVVAHELAHQWFGNLVTMEWWTLLWLNNEGFATWVSYLATDSL  
PEWK**IWTQFLDEST****EGLR**LDGLEESHPIEVEVNHAAEIDEIFDAISYRKGASVIRMLQSYLGAEVFQK**S**  
**LAAYIK**NHAYSNAKTEDLWAALEAGSGEPVNKLMSSWTKQKGYPVVSAKIKDGKLELEQSRFLSSGSPG  
EGQWIVPVTLCCGSYEKRKNFLLESKSGAYDLKELLGCSIADGSDKINGTCSWIKINVDQAGFYRVKYD  
DSLAAGLRNATESQSLTSDRYGILDDSFALTMARQQSLASLLTLC SAYKKELDYTVLSNLIAISYKVY  
KIGADANQELMSGIKHFFIGVFQFAAGKLGWDPK**QGESHLDAMLR**GEVLTALAVFGHDETLKEAVRRFD  
**AFLADRNTPLLPDIR****AAAVAVMQRANKSDK****SGYESLLR**VYR**ETDLSQEK**TRILGSLASCPDPTIVQD  
VLNFVLSDEVNRQDALYGLSGVSWEGREVAWKWLQEKWEYIGNTWGSGLITR**FISAVVSPFASF****EKA**  
**EVEEFFATR**SKPSMARTLKQSIERVHINANWVESIKKEDNLTQLVAQLSSN



## Protein No.: I-743

### Protein name and Species:

Cytochrome P450, putative OS=Ricinus communis

GN=RCOM\_1517900 PE=3 SV=1

Accession: [tr|B9SDH3|B9SDH3\\_RICCO](#)

Unused ProtScore: 3.29

Seq Cov %: 2.3

### ITRAQ Changed Ratio:

117: 115=E3TL: D3TL=2.11

116: 114=E5TL: D5TL=1.19

### Annotated typical Precursor MS Region:

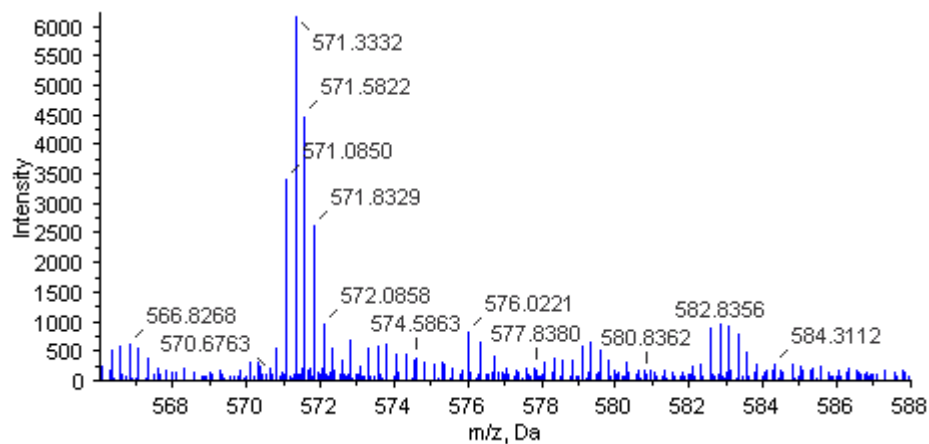

## Sequence Coverage and Matched peptides: in different color

MEIWLFIPIISLAVSILLKLVINHLLSTKNSTHKLPPGPSPLPILGSSLWLT'TTVFDLESALRSLHSKFG  
PLLTLMGSRPAI**FIADR**SLAHEALIQNSSIFADRPPALGMEKINTSDQHTISSAFYGPTWRLLRRNLT  
AKVLHPSNIKSYSHTRKVVQILKDRLESEFKERGRIQVMGHFQYAMFCLLAFMCFGDNLEEDQIRKIE  
EVQRQLLLNFVEFSVFSFWPSVTKVLFKRKRWDEYMQIR**KNQENVLIPLLR**SRKAQRDKETDSVLPYVDT  
LMDLGLPDEKRRKLEEEEIVSLLSEILNGGTETTATALQWIMANLVK**YPHIQEK**LYMEIRRIVGEDEDLI  
KEDELQKMPFLK**AVILEGLR**RHPPAHMVVPHAVTEDTVLDKYLIPKNGTVNFMVAEMGWDSKVWKD**MA**  
**FK**PERFMGSEYEHEVFDITGSREIKMMPFGLGRRMCPGHGLAMLHLEYLVANMVWSYEWKGMGNGVDL  
SEKLEFSVVMK**NPLQAQISPRRRHKL****IIDKI**

# Protein No.: I-744

## Protein name and Species:

cytochrome b5 reductase 1-like, NADH [Vitis vinifera] OS=Vitis  
vinifera GN=VIT\_13s0047g01190 PE=4 SV=1

Accession: tr|F6HIY1|F6HIY1\_VITVI

Unused ProtScore: 3.29

Seq Cov %: 6.8

ITRAQ Changed Ratio:

117: 115=E3TL: D3TL=1.61

116: 114=E5TL: D5TL=2.01

Annotated typical Precursor MS Region:

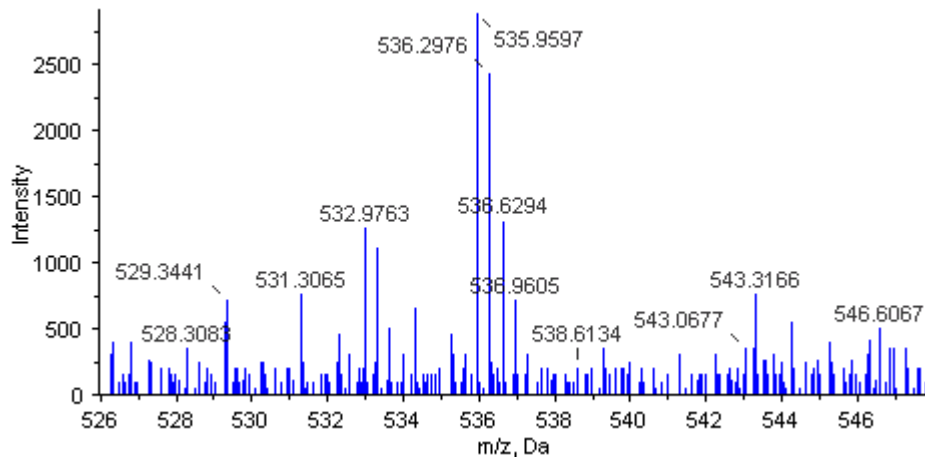

Sequence Coverage and Matched peptides: in different color

MWKMTSTLLPTFRVTWPLKTPGIELSGFAVGLAAVGLAAVYFFYGRRKPKGCCLDPERFQDFKLVQKTRI  
SHNVGRFRFALPTPTS VFGLPVGQHIICRGKDDQGAEVIRPYTPITLSDVGFYELVVKMYPKGQMSHH  
FRKMREGDTLAVKGRGRLIYKPGQAKAFGMLAGGTGITPMFQLTRAILENPKDKTNVHLIYANISYDD  
ILLKDELDGFAFKFPNRFKVFYVLSQPPEAWNGGIGHISKEMIEKHCPAPAPDIQILRCGPPGMNKAMA  
GHLVALGYTPQMQFEF

# Protein No.: I-746

**Protein name and Species:**

**40S ribosomal protein S23 OS=Solanum tuberosum PE=2 SV=1**

**Accession:** tr|Q38HT5|Q38HT5\_SOLTU

**Unused ProtScore:** 3.29

**Seq Cov %:** 11.3

**ITRAQ Changed Ratio:**

**117: 115=E3TL: D3TL=0.62**

**116: 114=E5TL: D5TL=0.41**

**Annotated typical Precursor MS Region:**

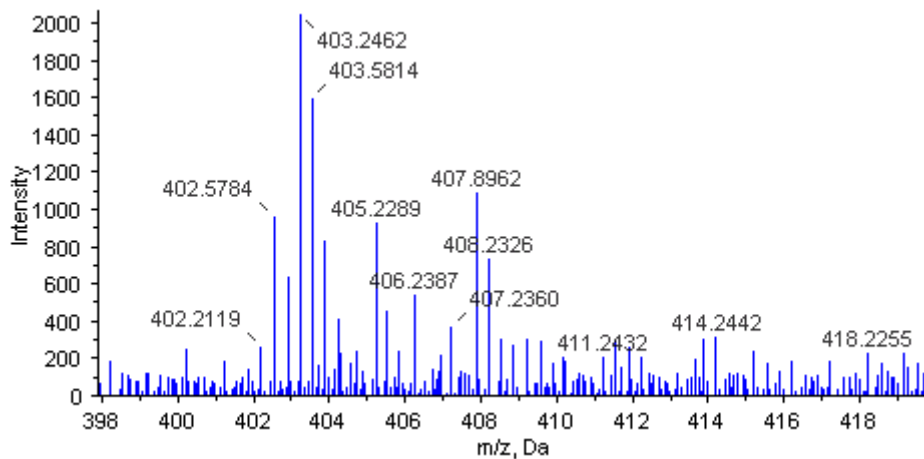

**Sequence Coverage and Matched peptides:** in different color

MGKTRGMGAGR K L K S H R R R Q R W A D K S Y K K S H L G N E W K K P F A G S S H A K G I V L E K I G I E A K Q P N S A I R K C A  
R V Q L I K N G K K I A A F V P N D G C L N Y I E E N D E V L I A G F G R K G H A V G D I P G V R F K V V K V S G V S I L L A L F K E K K E  
K P R S

# Protein No.: I-757

Protein name and Species:

Very-long-chain enoyl-CoA reductase-like OS=Populus  
trichocarpa GN=POPTRDRAFT\_720621 PE=2 SV=1

Accession: tr|A9PDL9|A9PDL9\_POPTR

Unused ProtScore: 3.24

Seq Cov %: 7.1

ITRAQ Changed Ratio:

117: 115=E3TL: D3TL=1.94

116: 114=E5TL: D5TL=2.66

Annotated typical Precursor MS Region:

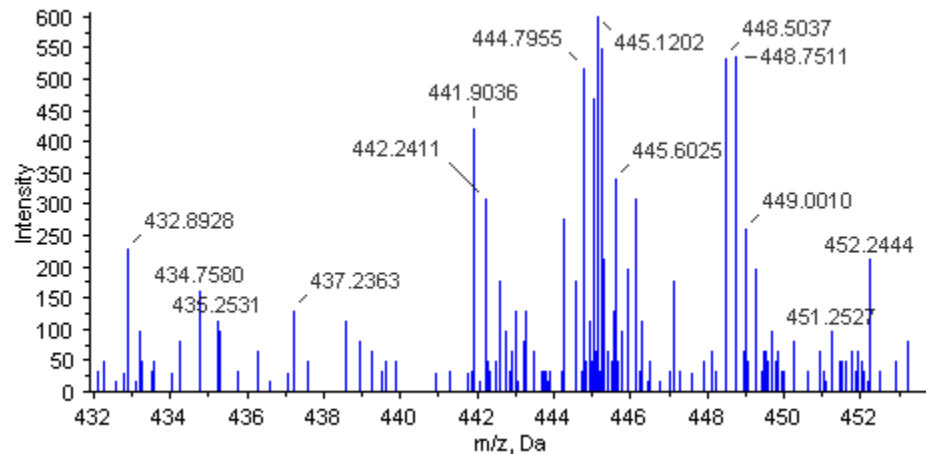

Sequence Coverage and Matched peptides: in different color

MKVTTVVSRSGREVIVKGGLELSDSATVADLQEAIIHKRTKKFYPARQR**LTLPPLPPGSKERPTVLN**YKKNL  
EYQDGNLDS**L**TIL**FK**DLGPQVSYRTLFFFEYLGPLVLYPFFYYFPVYQFLGYKGEHIMHPVQTYALYYW  
CFHYFKR**IMETFFVHRF**SHATS**SPLSNVFR**NCAYYWTFGSYIAYVNVHPLYTPVGDLMQKIGFGFGLVCQ  
LANFYCHILLRNLRRPDGNGGYQIPSGFLFNIVTCANYTTEIYQWLGFNIAQTQTVAGYIFLVVAASIMT  
NVALAKHRRLLKFLFDGKDGPRPKYPRRWVILPPVL

## Protein No.: I-758

**Protein name and Species:**

**Suppression of tumorigenicity, putative OS=Ricinus communis**

**GN=RCOM\_0712150 PE=4 SV=1**

**Accession: tr|B9RRB9|B9RRB9\_RICCO**

**Unused ProtScore: 3.22**

**Seq Cov %: 6.4**

**ITRAQ Changed Ratio:**

**117: 115=E3TL: D3TL=0.52**

**116: 114=E5TL: D5TL=1.68**

**Annotated typical Precursor MS Region:**

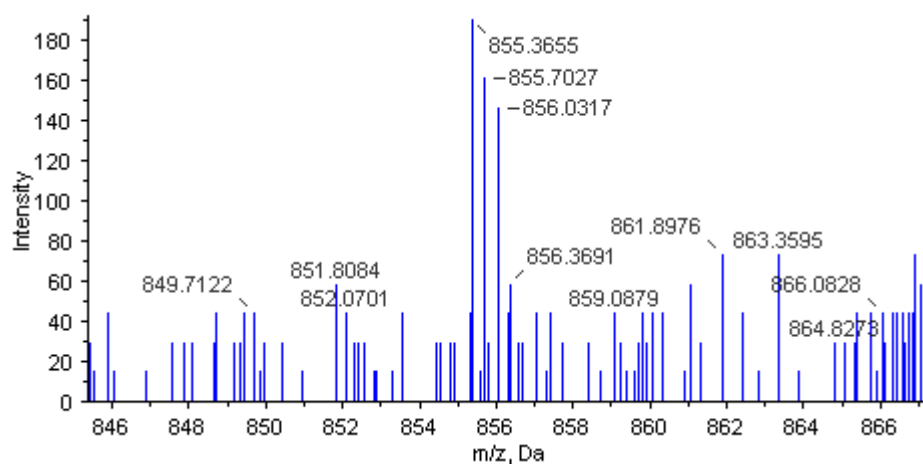

## Sequence Coverage and Matched peptides: in different color

MAKNEDTGSPGWR**ASLFLQTTEDVARAVAAAAAATAPR**SPR**PSVVFSSK**DDHGDSQFQKLQRHVTRVL  
KGFSSPPPEVKAGTYNPEVLTSQKRQWANFQLQYLDHRSLKEPSRLFESMVVGLHPNCDLQALQRQYV  
ARKSEGSARLQGSFGCQNSRVEPVLEPQVLFVY**PPDK**QLPLKYKDLLSFCFPGGMEVHAVEKTPSMSE  
LNEILLGQEHKQSDLSFVFRQLQVADDSTLYGCCVLVDEIVQKPSGLLSMISDKRSSCSSLSRYVLTR  
RCYCILSRLPFFELHFGVLNSIFTEERLERLTRHIGAFDLESSEGYDKDENLGYNLDSVSPNYIAAEDR  
LDGAAETFQSSLRDSTPGEDNKNHMEHCITEEHIHLLQKGVNDNIVVPVESETEIVSNKGESGGNLED  
SDICVDDLKQAEERRLPNAVLPLIR**YYQYESSSESSSFQGSPEDR**NFRSDIDDTETEEASTSGQED  
TNDHMDILEWAKVNNYGSLQIICK**YYQLHCP**SRGSTLRRLHPLEHLHPLEYHRTDETIVLHIAGSVIDLRT  
CSTLEFAEAHSALSAAAAEATALSTWAVACICGSLRLENVLTFLFAGALLEKQIVFVCSNLGILSASVLS  
I**VPLIR**PYQWQSLMPLPDDMLDFLDAPVPYVVGKNTSEVQSKLTNVIIVDVNKNQVKSHTIPQLP  
KHRELFSSLSPYHAKLVGESYLARKRPVHECTDVQVCYSA

# Protein No.: I-759

Protein name and Species:

Peroxidase 12, putative OS=Ricinus communis

GN=RCOM\_0961200 PE=3 SV=1

Accession: tr|B9SEA1|B9SEA1\_RICCO

Unused ProtScore: 3.22

Seq Cov %: 7.1

ITRAQ Changed Ratio:

117: 115=E3TL: D3TL=2.49

116: 114=E5TL: D5TL=1.56

Annotated typical Precursor MS Region:

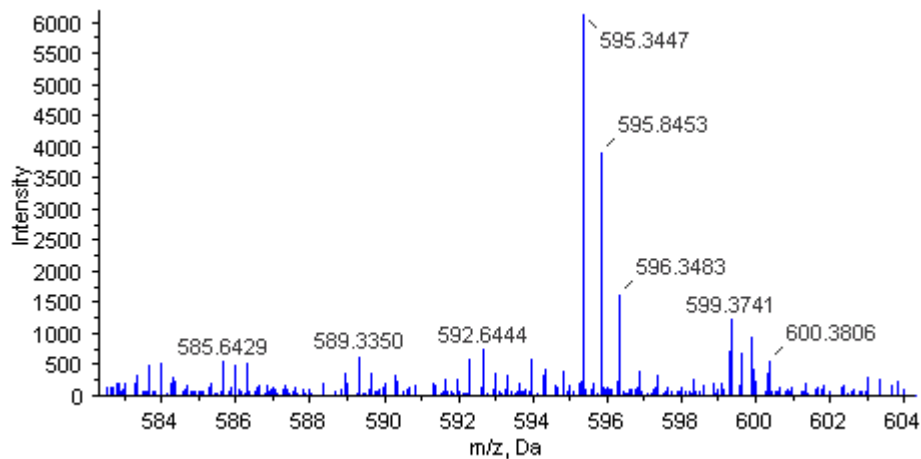

Sequence Coverage and Matched peptides: in different color

MASANSFTSLLLIISCLLLAACFSAIEAQTKPPIKNGLSWTFYKTSCKPAESIIRSELKKIFKKDVGQAA  
GLLR<sup>1</sup>LHFHDCFVLGCDSSVLLDGSAGGPSEKSELPNLTLRKQAFKIVEDLRLARLHKECGRVVS<sup>2</sup>CSDIVA  
IAAR<sup>3</sup>DSVVL<sup>4</sup>TGGPEYAIPLGRRDGVKFAEINATFEHLVGP<sup>5</sup>TAKVTEILTKLDRKGLDATDAVALSGGHT  
IGIGHCTSFT<sup>6</sup>TERLYPSQDPTMDK<sup>7</sup>TFANNLKLTCPKLDTTNTTFLDIRSPNKFDNKYYVDLMNRQGLFTS  
DQDLYTDKRTRSIVTSFAINESLFF<sup>8</sup>EKFIIGMIKMGQLDVL<sup>9</sup>TGNQGEIR<sup>10</sup>ANCSAINPKKYYIESVAEEE  
LGSSSEMR



# Protein No.: I-760

**Protein name and Species:**

**elongation factor 2-like OS=Vitis vinifera**

**GN=VIT\_19s0027g00760 PE=4 SV=1**

**Accession: tr|F6H4T7|F6H4T7\_VITVI**

**Unused ProtScore: 3.21**

**Seq Cov %: 25**

**ITRAQ Changed Ratio:**

**117: 115=E3TL: D3TL=1.63**

**116: 114=E5TL: D5TL=1.51**

**Annotated typical Precursor MS Region:**

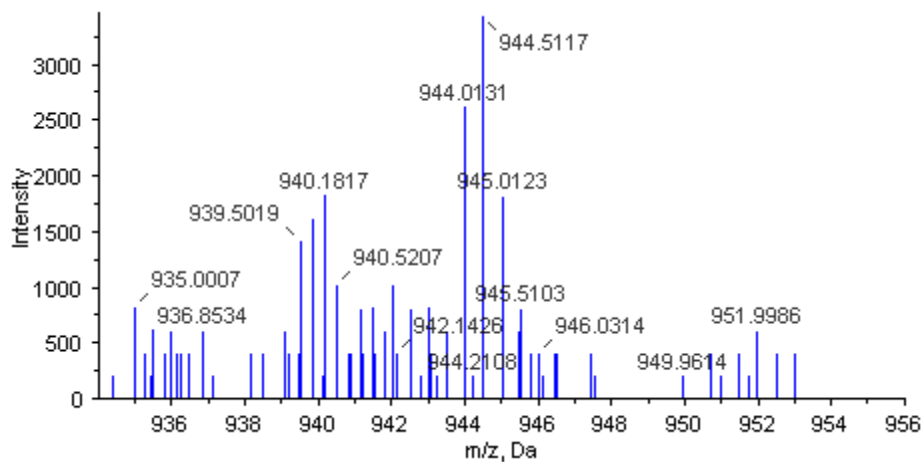

## Sequence Coverage and Matched peptides: in different color

MDFNRICLPLWVKFTVEELRRIMDYKHNIR**NMSVIAHVDHGKSTLTDSLVAAGIIAQEVAGDVR**MTDT  
RQDEAERGITIK**STGISLYYEMSDESLK**NYRGERQNEYLINLIDSPGHVDFSSSEVTAALRITDGALVV  
VDCVEGVCVQTETVLRQALGER**IRPVLTVNK**MDR**CFLLELQVDGEEAYQTF**SRVIENANVIMATYEDPLL  
GDVQVYPEKGTVAFSAGLHGWAFT**LTNFAK**MYASK**FGVDESK**MMERLWGENFFDPSTRKWTTKNTGAPN  
CKR**GFVQFCYEP**IK**QIINTCMNDQKDKLWPLQKLGVTMK**SDEKDLMGKALMKRVMQTWLPASTALLEM  
MIFHLPSPSTAQKYR**VENLYEGPLDDIYATAIRNCDEGP**LM**LYVSK**MIPASDKGR**FFAFGRV**FSGKVS  
TGLKVR**IMGPNYVPGEK****KDLYVK**SVQR**TVIWMGKRQETVEDVPCGN**TVAMVGLD**QFITK**NATLTNEKES  
**DAHP**IRAMK**FSVSPVVRVAVQCKVASDLPK**LVEGLKRLAKSDPMVVCSEESGEHIAGAGELHLEICL  
**KDLQDDFMGGAEIVK**SDPVVSFR**ETVLEK**SCRTVMSKSPNKHNRL**LYMEARPLEEGLAE**AIDDGRVGPRD  
DPKARSK**ILSEEF**GWKDLAKK**IWCFGPETTGP**NMVDMCKGVQYLNEIKDS**VVAGFQWASKEGALAE**  
**NMR**GICFEVCDVVLHADAIHR**GGGQVIPTARRVIYASQLTAKPR**LLEPVYLVEIQAPEQALGGIYSVLN  
QKR**GHVFEEMQR****PGTPLYNIKAYLPV**VESFGFS**GTLR**AAATSGQAFPQCVDHWDVMSADPLEAGSTAAQ  
LVADIRKRKGLK**EQMTPLSEFEDKL**

# Protein No.: I-763

**Protein name and Species:**

**Cinnamoyl-CoA reductase OS=Hevea brasiliensis GN=CCR**

**PE=2 SV=1**

**Accession: tr|E9M776|E9M776\_HEVBR**

**Unused ProtScore: 3.19**

**Seq Cov %: 5.9**

**ITRAQ Changed Ratio:**

**117: 115=E3TL: D3TL=0.58**

**116: 114=E5TL: D5TL=1.02**

**Annotated typical Precursor MS Region:**

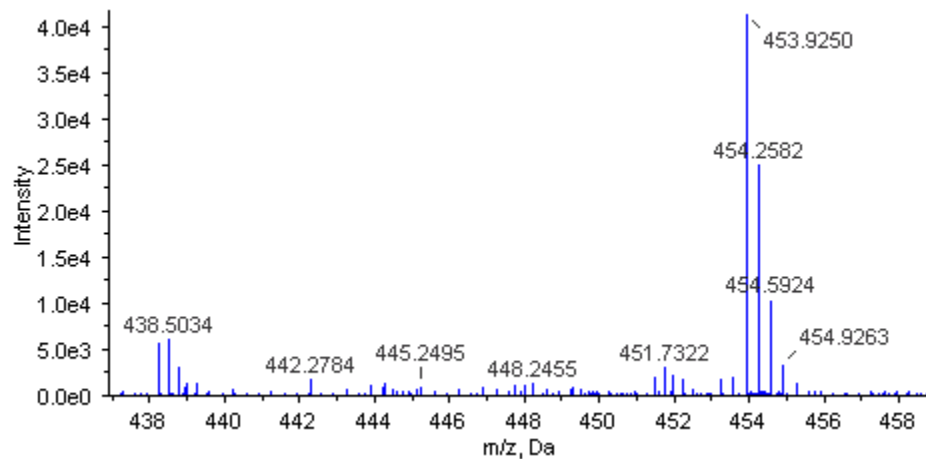

**Sequence Coverage and Matched peptides: in different color**

MPVDTSSLSGHHQTVCVTGAGGFIA SWIVKLLLLERGYTVK**GTVRNP**DDPKNSHLRELEGAKERLTLCK**A**  
**DLLDYESLR**KAIMGCDGVFHAASPVTDDPEQMVEPAVNGTKNVVIA**AEAK**VRRVVFVTSSIGAVYMDPN  
RNPDVVVDESCWSDLDFCKNTKNWYCYGKAVAEQA AWEVAKEKGVDLVAVNPVVLVLP LLQSTVNAS I I  
HILKYL**TGSAK**TYANSVQAYAHVKDVALAHILVYEIP SASGR**YLCAESVLHR**GEV**VEILAK**SFPEYPI P  
TRCSDEKNPRAKPYKFSNQKLDLGM EFTPVKQCLYETVKSLQERGHLP I PKQPEDSIRIQS

## Protein No.: I-771

**Protein name and Species:**

**Multicopy suppressor of IRA1 OS=Nicotiana tabacum**

**GN=MSI1 PE=2 SV=1**

**Accession: tr|B0LUS9|B0LUS9\_TOBAC**

**Unused ProtScore: 3.09**

**Seq Cov %: 5.7**

**ITRAQ Changed Ratio:**

**117: 115=E3TL: D3TL=0.58**

**116: 114=E5TL: D5TL=0.52**

**Annotated typical Precursor MS Region:**

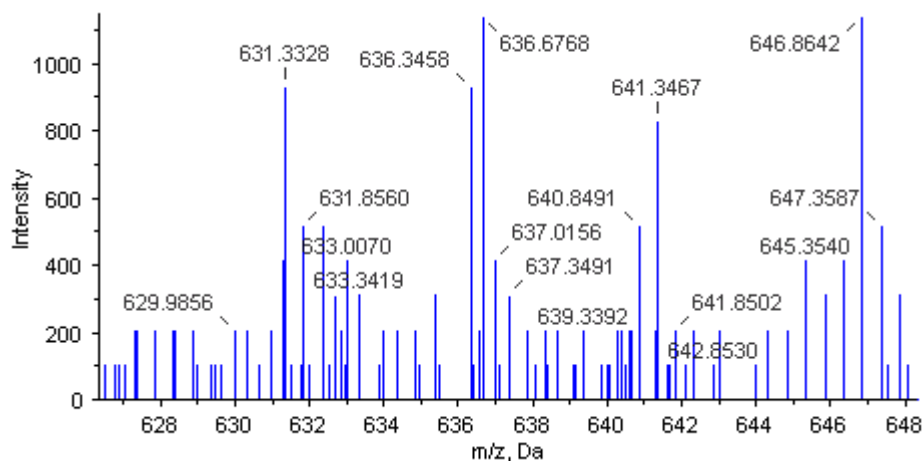

## Sequence Coverage and Matched peptides: in different color

MGKDEDEMRGEIEERLINEEYKIWKKNTPFLYDLVITHALEWPSLTVEWLPDREPPGKDYSVQKMILG  
THTSENEPNYLMLAQVQLPLEDAENDARHYDDDRSEFGGFGCANGKVQIIQQINHDGEVNRARYMPQNS  
FIIATKTI SAEVYVFDYSKHPSKPPLDGACNPDLRLRGHSTEGYGLSWSQFKQGHL LSGSDDAQTCLWD  
INATPKNKALDAMQIFKIHEGVVEDVAWHLRHEYLFGSVGDDQYLHIWDLRTPSVTKPIQSVVAHQSEV  
NCLAFNPFNEWVVATGSTDKTVKLFDLRKISTALHTLDCHKEEVFQVGWNPKNETILASCCLGRRLMVW  
DLSRIDEEQTPEDAEDGPPELLFIHGGHTSKISDFSWNPCEDWVASVAEDNILQIWQMAENIYHDEDD  
LPGDDATKAP

# Protein No.: I-772

## Protein name and Species:

**ubiquitin-associated (UBA) zinc-finger and PB1  
domain-containing protein OS=Populus trichocarpa  
GN=POPTRDRAFT\_252306 PE=4 SV=1**

**Accession: tr|B9IEZ0|B9IEZ0\_POPTR**

**Unused ProtScore: 3.06**

**Seq Cov %: 5.5**

## ITRAQ Changed Ratio:

**117: 115=E3TL: D3TL=0.13**

**116: 114=E5TL: D5TL=0.57**

## Annotated typical Precursor MS Region:

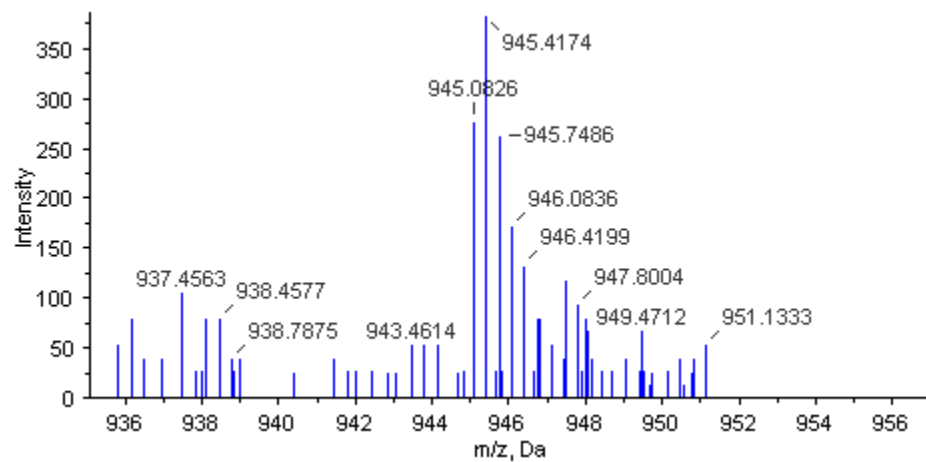

## Sequence Coverage and Matched peptides: in different color

IQVKYSDTLRRFNAHVKENEQLDLDLMIALREKIFGLFNFPPDADLTLYIDEDGDVVTLADDDDLRDVM  
RQNLKFLRIDVQLNNDKSGKSNARSSGSSTPMRSPRVQSPLPCLNNGVADVLR**SVPEPLR**EVLSK**ISLD**  
**LTSK**AVASNTVLTTELVD**CFSK**MGQYHLNPTSQSHDGIGAQTGATAPTVLNASKDGGLKEDLLNLNSPLK  
TSQEERFENGTKTAMSPHTAVPSPVNLNPNPQISNSHVIKRNNLNNPMVGMFHR**GVQCDGCGVHPITG**  
**PRYKSKVK****EDYDLC****SICFAEMGNEADYIK****MDR****PMPYR**NRWSFKGFNDPKSWAIPQPLSKGSYGKGAQP  
KLDSRFVLDVNVSDGTMPTCTPFTKIWRMRNNGSVAWPQGVRL**VWIGGDR**FFNTDSVEIEIPVNGVPI  
DGELDVAADFVSPALPGR**YISYWR**MAYPSGGKFGQRVWVLI EVDASLKDPFFKYLNLNESPNYIGSKFP  
GVLDMNVQPAVDGCFLEPQNNNTLLSEPDVPMVDEQPKSQELKFPIDDALLIGHGVSASAPPQAMPSSVP  
VLYPMIDISETVPASTELLPAADASTSPEEVIVENAVEKTLLKELKEMGFKQVDLNKEILRRNEYDLEQ  
SVDDL CGVSDWDP ILEELQEMGFRDKEMNKLLLKKNNGSIKGVVMDILTGKK

## Protein No.: I-774

**Protein name and Species:**

Vacuolar sorting protein, putative OS=Ricinus communis

GN=RCOM\_0363260 PE=4 SV=1

**Accession:** tr|B9SYU2|B9SYU2\_RICCO

**Unused ProtScore:** 3.05

**Seq Cov %:** 2.5

**ITRAQ Changed Ratio:**

**117: 115=E3TL: D3TL=1.96**

**116: 114=E5TL: D5TL=2.06**

**Annotated typical Precursor MS Region:**

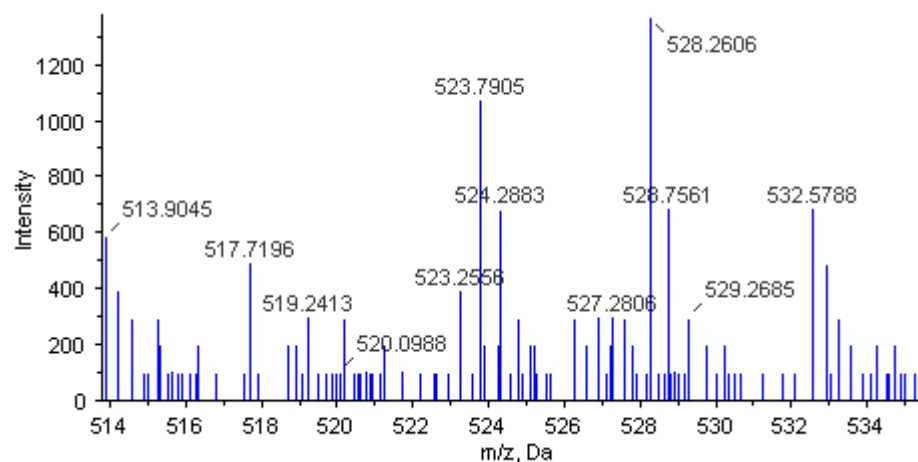



## Sequence Coverage and Matched peptides: in different color

MIADGVENEKWLAAAGIAGLQQNAFNMHRALDSNNLRDALKYSAQMLSELR<sup>TSKLS</sup>SPHKYYELYMR<sup>AFD</sup>  
ELR<sup>KLEIFFREETR</sup>RGCSIIDLYELVQHAGNILPRLYLLCTVGSVYIKSKEAPAKDVLKDLVEMCRGIQ  
HPVR<sup>GLFLR</sup>SYLSQVSRDKLPDIGSEYEGDADTVMDAVEFVLQNF<sup>TEMNKLWVRMQHQPAREKEKREK</sup>  
ERSEL<sup>RDLVGKLNHLVLSQIEGV</sup>DLDMYKETVLPVLEQVVNCKDEIAQFYLMDCI<sup>IQVFP</sup>DEYHLQ<sup>TLE</sup>  
VLLGACPQLQPSVDIKMVL<sup>SRLMERLSNYAAS</sup>STEVLPEFLQVEAFSKLNHAIGKVIEAQVDM<sup>MPMGAV</sup>  
TLYSSLLTFTLHVHPDRLDYADQVLGACVKKLSNKGKLEDSKATK<sup>QIVALLSAPLEK</sup>YNDVVTALKLSN  
YPRVMEYLDNETNK<sup>VMA</sup>TVII<sup>QSIMK</sup>NNTRIS<sup>ADKVEALFELITGLIK</sup>DL<sup>DGT</sup>HEEVD<sup>EDDFK</sup>EEQNS  
VAR<sup>LIQMLHND</sup>DPEEMYKI<sup>ICTVRKQIMTGGPKRLPFTVPPLV</sup>FSS<sup>LKLVRR</sup>LQ<sup>Q</sup>EE<sup>NPF</sup>GDES<sup>STTP</sup>  
KKIFQLLNQMI<sup>EALSIVPAPELALRLYLQCAEA</sup>ANDSDLEPVAYEFFTQAYILYEEDISDSKAQVTALH  
LII<sup>IGTLQRMHVFGVENR</sup>DTLTHKATGYSAKLLKKPDQCR<sup>AVYGC</sup>AHLFWDDQDNMKDGERVLI<sup>CLKRA</sup>  
LRIANAAQQMANATRGSTG<sup>SVTLFVEILNKYLYFF</sup>EKG<sup>NPQVTVA</sup>AIQSLIE<sup>LITTEMQ</sup>SDS<sup>STPD</sup>PAA  
DAFFASTLRYIQFQKQKGGGAIGEKYEPLKIVTG

## Protein No.: I-778

**Protein name and Species:**

**Phosphoglycerate dehydrogenase OS=Populus trichocarpa**

**GN=POPTRDRAFT\_1069632 PE=2 SV=1**

**Accession: tr|A9PEK1|A9PEK1\_POPTR**

**Unused ProtScore: 3.04**

**Seq Cov %: 4.2**

**ITRAQ Changed Ratio:**

**117: 115=E3TL: D3TL=0.19**

**116: 114=E5TL: D5TL=0.54**

**Annotated typical Precursor MS Region:**

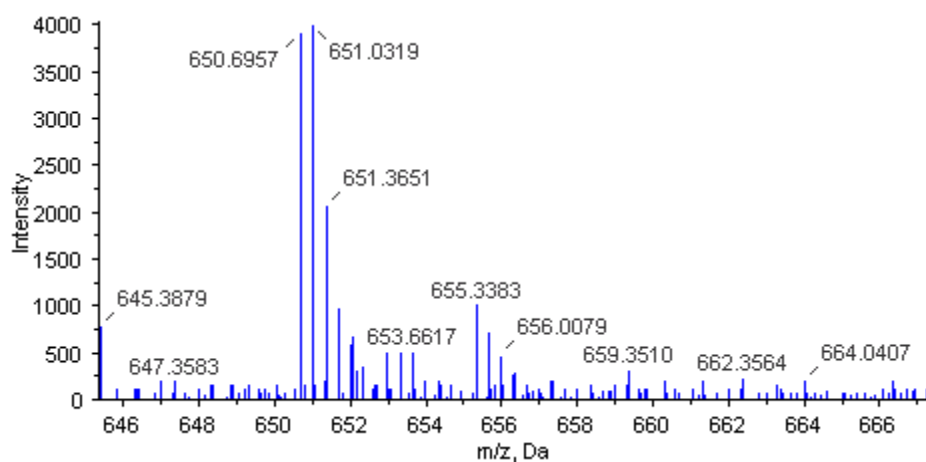

## Sequence Coverage and Matched peptides: in different color

MAATTSTAASSLLATKKNLSSLSLTSANKLPAFSPLLTSSRRQRFIVLSASLNSKPTVLVAEKLGEAGI  
NLLKDFANVDCSYNLSPELCTKISLCDAIIVRSGTKVSREVFESSGGRLKVVGRAGVGIDNVDLAAAT  
EHGCLVVNAPTANTVAAAHEGIALMAAMARNVAQADASVKAGKWERNKYVGVSLVGKTLAVMGFGKVG  
EVARRAKGLGMHVIAHDPYAPADRARAIGVELVSFDEAIATADFISLHMPLTPATAKILNDETFAMKK  
GVRIVNVARGGVIDEDALVRALDAGIVAQAALDVFTVEPPPQDSKLVQHERVTVTPHLGASTKEAQEGV  
AIEIAEAVVGALKGELASTSVNAPMVAEVLTELKPYVELAEKLGRLAVQLVSGGSGVKDVKVTYASAR  
APDDLDTRVLRAMITKGLIEPISSVFVNLVNADFSKQRGLRISEERILGDGSPESPLHFIQVQIANVE  
SKFASAISENGEIKVEGRVKDGIPHLTKVGSFEVDVSLEGSIIILCRQVDQPGMIGKVGSVLGVENVVNS  
FMSVGRIAPRKQAVMAIGVDEQPSKETLKKIGDIPAVEEFVFLKL

## Protein No.: I-779

**Protein name and Species:**

Sucrose synthase [Arabidopsis thaliana] OS=Arabidopsis lyrata  
subsp. lyrata GN=ARALYDRAFT\_494980 PE=4 SV=1

**Accession:** tr|D7MNN8|D7MNN8\_ARALL

**Unused ProtScore:** 3.03

**Seq Cov %:** 8.6

**ITRAQ Changed Ratio:**

**117: 115=E3TL: D3TL=0.27**

**116: 114=E5TL: D5TL=0.33**

**Annotated typical Precursor MS Region:**

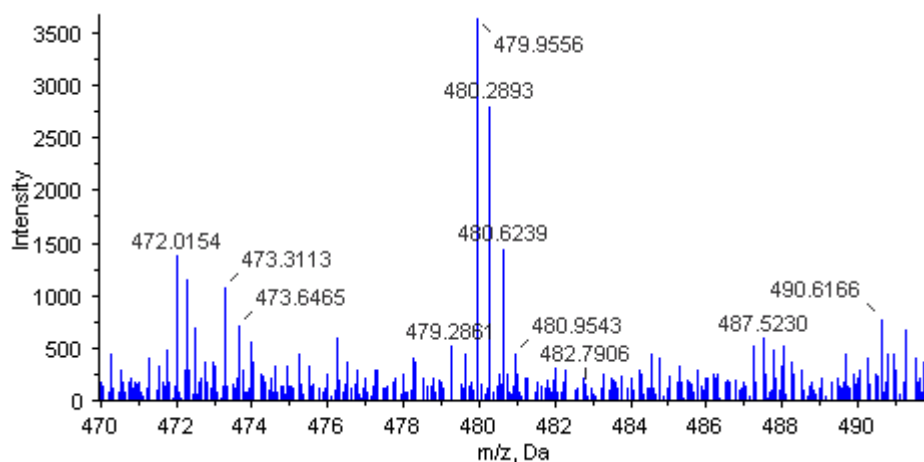

## Sequence Coverage and Matched peptides: in different color

MPTGRFETMREWVHDAISAQRNELLSLFSRYVAQKGILQSHQLIDFLKTVKVDGTTEDLNKSPFMKV  
LQSAAEEAIVLPPFVALAIRPRPGVREYVRVNVYELSDHLTVSEYLRFKKEELVNGHANGDYLLELDFEP  
FNATLPRPTR**SSSIGNGVQFLNRHLSIMFR**NKESMEPLLEFLRTHKHDGR**SMMLNDR**IQNIPIIQGAL  
AR**AEEFLSK**LPLATPYSEFEFELQGMGFERGWGDTAQKVSEMVHLLLDILQAPDPSVLETFLGRIPMVF  
NVVILSPHGYFGQAN**VLGLPDTGGQVVYILDQVRALENEMLLR**IQKQGLEVIPKILIVTRLIPEAKGTT  
CNQRLEKVSGETEHAHILRIPFRTEKGILRKWISRFDVWPYLETFEAEDASNEISAELQGVNLIIGNYSD  
GNLVASLLASKLGVMQCNIHAHALEKTKYPESDIYWRNHEDKYHFSSQFTADLIAMNADFIIITSTYQEI  
AGSKNNVGQYESHTAFTMPGLYR**VVHGIDVFDPK**FNIVSPGADMTIYFPYSDKERRLTALHESIEELLF  
SAEQNDEHVGLLSDQ**SKPIIFSMAR**LDRVKNLTGLVECYAKNSKLRELANLVIVGGYIDVNQSRDREEM  
AEIQMHSLIEQYDLHGQFRWIAAQMNRRANGELYRYIADTKGVFVQPAFYEAFGTLTVVESMTCGLPTF  
ATCHGGPAEIIENGVSGFHIDPYHPDQVAATLVSSFETCNTNPNHWVKISEGGLKRIYERYTWKKYSER  
LLTLAGVYAFWKHVSKLERRETRR**YLEMFYSLK**FRDLANSIPLATDEN

# Protein No.: I-780

**Protein name and Species:**

**Calcium          ATPase          OS=Populus          trichocarpa**

**GN=POPTRDRAFT\_768258 PE=3 SV=1**

**Accession: tr|B9HPP7|B9HPP7\_POPTR**

**Unused ProtScore:    3.03**

**Seq Cov %: 2.4**

**ITRAQ Changed Ratio:**

**117: 115=E3TL: D3TL=2.01**

**116: 114=E5TL: D5TL=1.67**

**Annotated typical Precursor MS Region:**

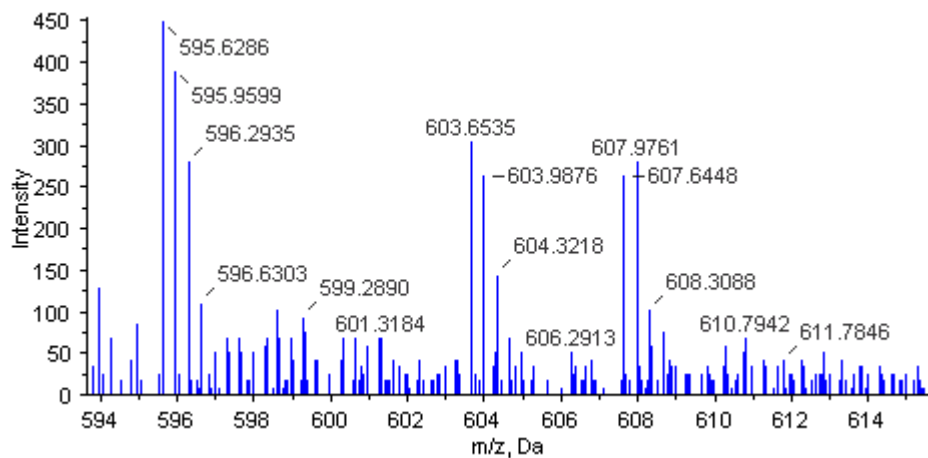

## Sequence Coverage and Matched peptides: in different color

MKGGEDYGERDQNGIESQNQGDIFPAWAKEVKECEEKYAVNREFGLSSADVEKRLKIYGYNELEKHEG  
VSIFKLIILDQFNDDLVRILLAAAIVSFVLAWYDGEEGGEMGITAFVEPLVIFLILIVNGIVGIWQESNA  
EKALEALK**EIQSEHATVIR**DRKKFSSLP**AKELVPGDIVELR**VGDKVPADMRVLNLISSTLR**VEQGSITG**  
**ESEAVSK**TAKPVAESTDIQGGKCMVFAGTTVVNGNCICLVTEETGMNTEIGKVHSQIHEAAQNEEDTPLK  
KKLNEFGEVLTMLIGIICALVW**LINLKY**FLTWYVDGWPKNFKFSFEKCTYYFEIAVALAVAAIPEGLP  
AVITTCALGTRKMAQKNALVRKLPVETLGCTTVICSDKTGTLTTNQMAVSKLVAMGSRVGTLS**FNV**  
**EGTTYSFPDGK**IEDWPVGRMDSNLQMIAKIAAVCNDAGVEQSGNHVYVAG**GMPTEAALK**VMVEKMGFPGG  
LSKESLVHEDVLACCRLWNTMEQRIATLEFDRDRKSMGVIVN**SSSGK**KSLLVK**GAVENLLDRSTSIQL**  
**LDGSVVALDR**CSKDL**LQNLRE**MSTSALRCLGFAYKEDLSEFRTYSGDEDHPAHQLLLDLHNYSSIESN  
LTFVGLAGLRDPPRKEVRQAIEDCKAAGIRVMVITGDNKNTAEAIICHEIGVFGPYDDISSKSLTGREFM  
GLRDKKTHLRQSG**LLFSRA**EPRHKQEI VRLLEDGEVAMTGDGVNDAPALKLADIGIAMGIAGTEVA  
KEASDMVLADDNFSTIVVAVGEGRSIYNMKA FIRYMISSNIGEVASIFLTAALGIPEGMIPVQLLWVN  
LVTDGPPATALGFNPPDGDVMKKPPRKSDDSLISAWILFRYLVIGFYVGIATVGVFI IWYTRHTFMGID  
LSGDGHSLVYTYSQLANWGHCEWKNFSASPFTAGSQVFNFDANPCEYLRSKIKASTLSLTVLVAIEMF  
NSLNALSEDCLVRMPPWVNPWLLLAMSVSFGLHFLILYVFPFLAQVFGIVPLSLNEWLLVLAVALPVIL  
IDEVLKFBVGRLTSGWRHSGSRRRPSKSKPE

# Protein No.: I-782

Protein name and Species:

Serine/threonine-protein kinase SRK2C OS=Arabidopsis  
thaliana GN=SRK2C PE=1 SV=1

Accession: sp|Q9M9E9|SRK2C\_ARATH

Unused ProtScore: 3.02

Seq Cov %: 6.4

ITRAQ Changed Ratio:

117: 115=E3TL: D3TL=0.54

116: 114=E5TL: D5TL=0.27

Annotated typical Precursor MS Region:

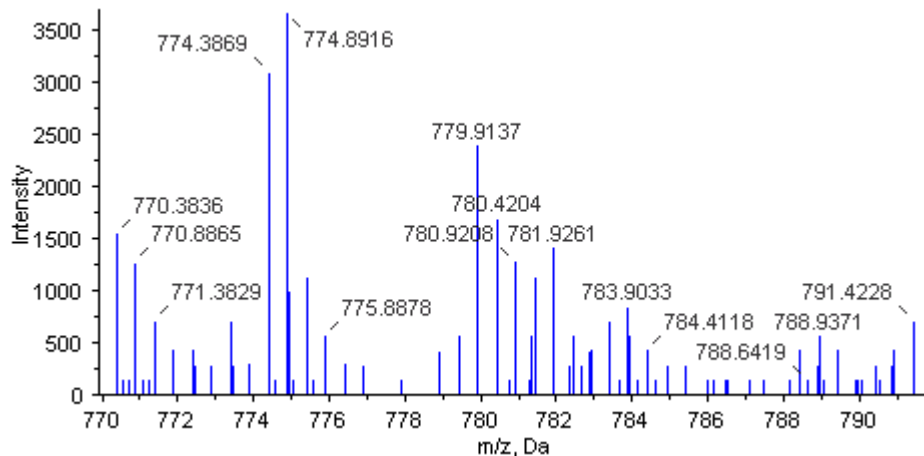

Sequence Coverage and Matched peptides: in different color

MERYEIVKDIGSGNFGVAKLVRDKFSELFAVKFIERGQKIDEHVQREIMNHRSLIHPNIIRFKEVLLT  
ATHLALVMEYAAGGELFGRICISAGRFSDEEARFFFQQLISGVNYCHSLQICHRDLKLENTLLDGSEAPR  
VKICDFGYSKSGVLHSQPKTTVGTPAYIAPEVLSTKEYDGIADVWSCGVTLYVMLVGAYPFEDPSDPK  
DFRKTIGRILKAQYAIIPDYVRSDECRHLLSRIFVANPEKRITIEEIKNHSWFLKNLPVEMYEGSLMMN  
GPSTQTVEEIVWLIIEEARKPITVATGLAGAGGSGGSSNGAIGSSSMDLDDLDTDFFDDIDTADLLSPL



# Protein No.: I-783

**Protein name and Species:**

**Nonsense-mediated mRNA decay protein, putative OS=Ricinus  
communis GN=RCOM\_0241560 PE=4 SV=1**

**Accession: tr|B9T5L2|B9T5L2\_RICCO**

**Unused ProtScore: 3.02**

**Seq Cov %: 4.5**

**ITRAQ Changed Ratio:**

**117: 115=E3TL: D3TL=0.62**

**116: 114=E5TL: D5TL=0.38**

**Annotated typical Precursor MS Region:**

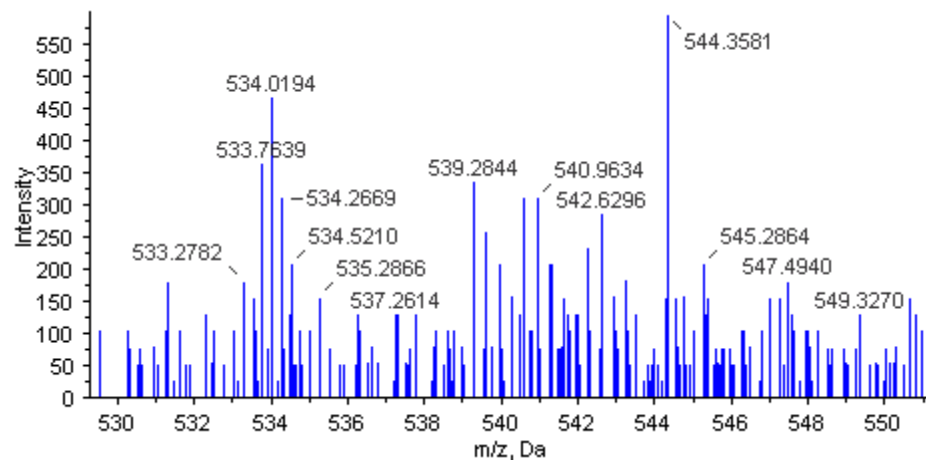

## Sequence Coverage and Matched peptides: in different color

MAEEAGMFMVRQTIGSVLCCCKCGIPMQPNAVNMCVKCLRSEVD **ITEGLK**KRVI IKHCPECDTYLQPPYT  
RIKAQLESKELMTFCVRTLDLKHAGVTLVHAEFIWTEPHSKRIKLRVQKEVHRGAVLEQSYIVEFVQ  
QESMCESCSRVQANPDQWVASVQLRQHVSHRRRTFFYLEQLILKHDAARAIAIKQMDQGIDFFFGNR **SH**  
**GVK FVEFLGK**VAPVRSRHDKQLVSHDPKSNNYNYK **YTF SVEISPICR**EDLVCLPPKVAVSLGNLGPLVI  
CTKVTNSIALLDPLTLRHICYLDGDQYWRSSFKSLTSLRQLVEYIVLDVDIISPEVNISSKYAMAQVQV  
ARLSDFGKNDTI **FFIK**THLGHILKPGDQALGYDLYGANSNDIELDKYK **GLVLPEALIK**KSYEEKRQRK  
RGKPRAWKLKSLMEVDDSRGRNDQEKMDTEYEQFLRDLEENAELRF **NVSLYR**NKEYQPSEMASVTDGE  
DVPSIPLEELLADLDISEMEDAADMRE

# Protein No.: I-784

**Protein name and Species:**

**ADP-ribosylation factor, putative OS=Ricinus communis**

**GN=RCOM\_0910690 PE=3 SV=1**

**Accession: tr|B9RTH6|B9RTH6\_RICCO**

**Unused ProtScore: 3**

**Seq Cov %: 15.9**

**ITRAQ Changed Ratio:**

**117: 115=E3TL: D3TL=1.64**

**116: 114=E5TL: D5TL=1.77**

**Annotated typical Precursor MS Region:**

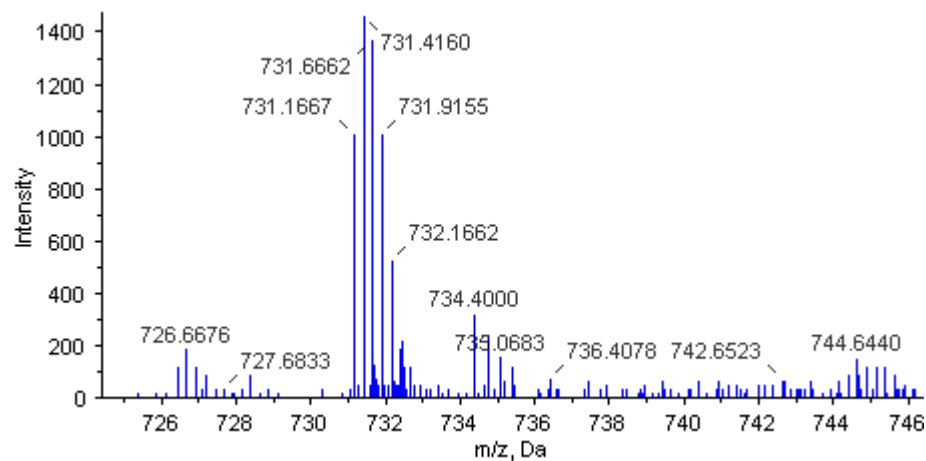

**Sequence Coverage and Matched peptides: in different color**

**MGGFISR**FWFMLFPAKEYK**IVVVGLDNAGK**TTTLYKLHLGEVVTTHTPTVGSNVEELVYKNIR**FEVWDLG**  
**GQDR**LRTSWATYYRGTHAVIAVIDSTDRARISIMKDELFRLLGHEDLQHSVILVLANKQDLK**DAMTPAE**  
**ITDALSLHSIK**NHDWHIQACCALTGEGLYDGLGWIAQRVTGKAPS

## Protein No.: I-789

**Protein name and Species:**

**Putative uncharacterized protein OS=Ricinus communis**

**GN=RCOM\_1588080 PE=4 SV=1**

**Accession: tr|B9R730|B9R730\_RICCO**

**Unused ProtScore: 2.98**

**Seq Cov %: 10.3**

**ITRAQ Changed Ratio:**

**117: 115=E3TL: D3TL=0.10**

**116: 114=E5TL: D5TL=0.14**

**Annotated typical Precursor MS Region:**

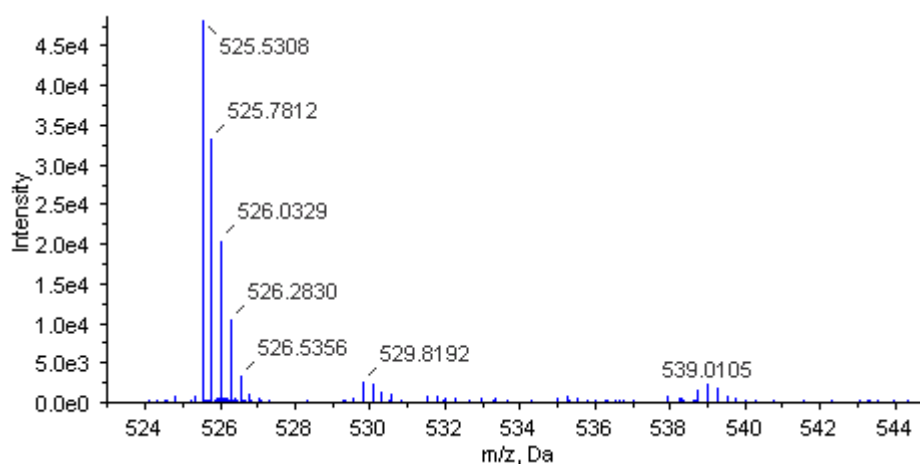

## Sequence Coverage and Matched peptides: in different color

MSWWWAGAIGAAKKKQEEDDAPRSFQSVALVLGVTGIVGNSLAEILPLSDTPGGPWK**VYGVAR**RPRPTW  
NADHPVEYIQCDISDSAETQSKLSQLTDITHIFYVTWTRQSEEDENCEINGLMFR**NVLQAVIPNAPNLR**  
HICLQTGAKHYVGPFFESLGGK**IQTHDPPFTEDLPR**LDAPNFYYTLEDIMFEEVAKKEGLTWSIHRPDQIF  
GFSPYSLMNIIGT**LCVYATICKHEGLPLLFPGTK**AAWNCYSVASDADLIAEHQIWASVDPYAKDEAFNC  
NNG**DVFK**WKHFVKVLAEQFGIEEYGFEEGEEKR**LSLVEMMK**GKEAVWEEIVSENQLQPTKLDEVAVWWFV  
DLMLGGEAVISSMKNKSK**EHGFLGFR**NSKNSFAS**SWIDK**MKAYKIVP

## Protein No.: I-790

**Protein name and Species:**

**Cycloartenol synthase OS=Ricinus communis PE=1 SV=1**

**Accession: sp|Q2XPU6|CAS1\_RICCO**

**Unused ProtScore: 2.98**

**Seq Cov %: 3.6**

**ITRAQ Changed Ratio:**

**117: 115=E3TL: D3TL=0.48**

**116: 114=E5TL: D5TL=1.16**

**Annotated typical Precursor MS Region:**

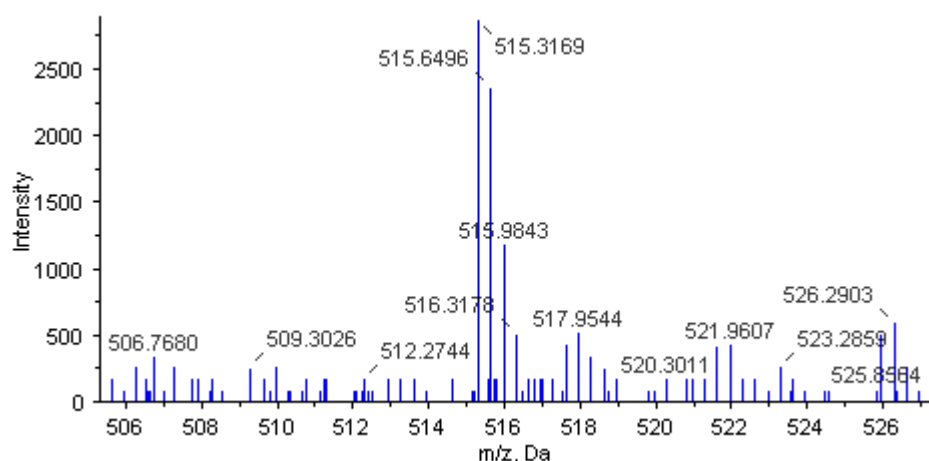

## Sequence Coverage and Matched peptides: in different color

MWKLRIAEGSGNPWLRRTTNDHIGRQVWEFDSKIGSPEELSQIENARQNF<sup>T</sup>KNRF<sup>I</sup>HKHSSDLLMRIQ<sup>F</sup>  
SKENPICEVLPQVKVKESEQVTEEKVKITLRRALNYYSIQADDGHWPGDYGGPMFLMPGLIIALSITG  
ALNAILSEEKREMCRYLYNHQNRDGGWGLHIEGPSTMFGSVLCYVSLRLLGEGPNEGEGAV<sup>E</sup>GRNWI  
LKHGGATAITSWGKMWLSVLGAYEWSGNNPLPPEM<sup>W</sup>LLPYILPVHPGRMWCHCR<sup>MVYLPMSYLYGKRFV</sup>  
<sup>GPITPTVLSLR</sup>KELYTV<sup>P</sup>YHEIDWNQARNQCAKEDLYYPHPMLQDVLWATLHKFVEPI<sup>L</sup>MHWPGKRLRE  
KAIQTAIEHIHYEDENTRY<sup>YICIGPVNK</sup>VLNMLCCWVEDPNSEAFKLHLPRLYDYLWLAEDGMKMQGYNG  
SQLWDTAFAVQAI<sup>V</sup>STNLI<sup>E</sup>EYGP<sup>T</sup>LKKAHSFIKKMQVLENC<sup>P</sup>GD<sup>L</sup>NFWYRHISKGAWPFSTADHG<sup>W</sup>PI  
SDCTAEGIKALMLLSK<sup>IPSEIVGEGLNANR</sup>LYDAVNVVLSLQNGDGGFPTYELSR<sup>S</sup>YSWLEFINPAETF  
GDIVIDYPYVECTSAAIQALTSFRKSYPEHQREEIECCIKKAAKFMEKI<sup>Q</sup>ISDGSWYGSWGVCF<sup>T</sup>YGTW  
<sup>FGIK</sup>GLVAAGKSFGNCSSIRK<sup>ACDFLLSK</sup>QCPSGGWGESYLS<sup>C</sup>QKKVYSNLEGDRSHV<sup>V</sup>NTAWAMLSLI  
DAGQAERDPTPLHRAARYLINAQMENGDFPQ<sup>Q</sup>EIMGVFN<sup>R</sup>NCMITYAAYRDI<sup>F</sup>PIWALGEYRCRVLKAS

## Protein No.: I-794

**Protein name and Species:**

Lactoylglutathione lyase [Vitis vinifera] OS=Vitis vinifera

GN=VIT\_10s0116g01660 PE=4 SV=1

**Accession:** tr|F6H7L5|F6H7L5\_VITVI

**Unused ProtScore:** 2.95

**Seq Cov %:** 23

**ITRAQ Changed Ratio:**

**117: 115=E3TL: D3TL=0.24**

**116: 114=E5TL: D5TL=0.19**

**Annotated typical Precursor MS Region:**

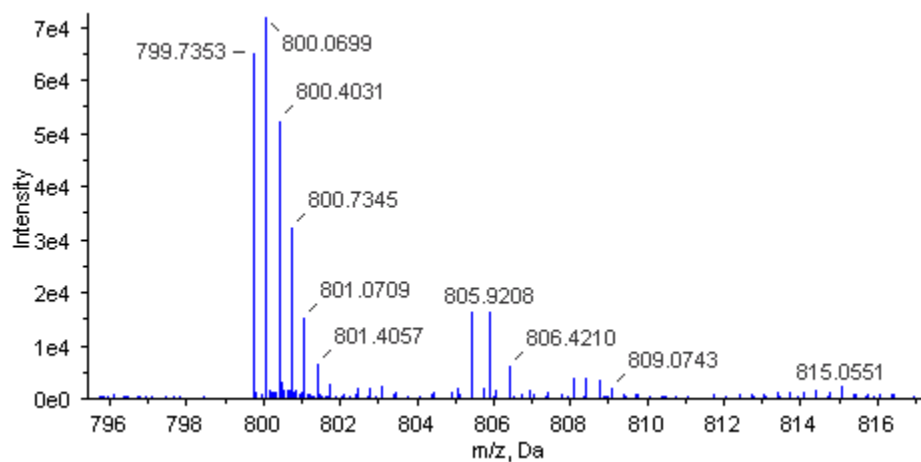



## Sequence Coverage and Matched peptides: in different color

MAE**AAPVVP**SDELLEWPKKDKRR**FL**HVVYR**VGDLDR**TIK**FYTECFGMK**LLRKRDIPEEKYSNAFLGFGP  
EETNFVVELTYKEDDETVEYLLNCFQQAPRYQLKLLRKVFDPWKL**AAPVVP**SDELLEWPKKDKRR**FL**  
**HVVYR****VGDLDR**TIK**FYTECFGMK**LLRKRDIPEEKYTNAFLGFGPEETNFVVELTYNYGVDKYDIGTGFG  
HFAIATQDVYKMVEDIR**AKGGI****ITREPGPVK**GGKSV**IAFAK****DPDGYIFELIQRGPTPEPLCQVMLR**VGD  
LERS**SIKFYEKALGMK**MVKKTDRPEYKYSIAMMGYAEHEHETTVLELTNYGVTEYTK**GNAYAQVAISTDD**  
**VYKSAE**VVNLVTKEL**GK****ITRQPGPIPGLN**TKITSFLDPDGWKTVLVDNEDFLKELHKEE

## Protein No.: I-799

### Protein name and Species:

protein argonaute 4A-like [Vitis vinifera] OS=Vitis vinifera

GN=VITISV\_044457 PE=4 SV=1

Accession: tr|A5BG74|A5BG74\_VITVI

Unused ProtScore: 2.93

Seq Cov %: 2.2

### ITRAQ Changed Ratio:

117: 115=E3TL: D3TL=0.55

116: 114=E5TL: D5TL=2.21

### Annotated typical Precursor MS Region:

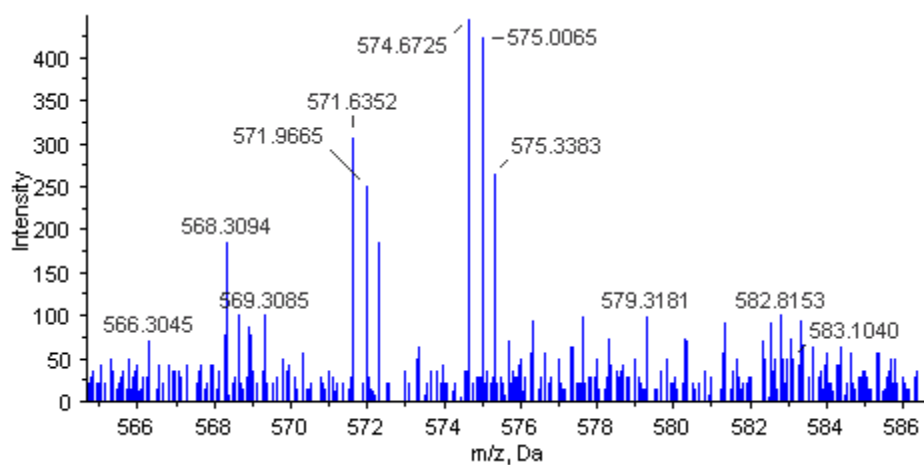

## Sequence Coverage and Matched peptides: in different color

MHPRPALMLPCIQPSRPALMLPCIQPLRQSYSSPTSEAHEFHVLQVLYKYLASCNRIILKRRLGRFVKNR  
TVCPVRWSDRWFERFNAGSTTKRFFETDRTEKLTGRRFDRSDRPNLTMESQXPPNAEPXK**RSSSIPNRL**  
**PMARR**GLGRTGETIQLVXNHFKVSMHSNANTGAHFYQYNVSLAXEDGHPADAKDIGRKMVDKVHETYHT  
EMAXMSFAYDGEKSLFTIGSLPSKCLRFTVVLEDASSNRISTXRNIDXPDDGSDRKRSRPYHSKTFNV  
EIS**FAAK**FPMDSIVRASYGQPSKHLQDAAX**VLDIILR**QHAACKGCLVVRQSFFDNLPXNFTPLGGGVLG  
CRGFNSSFRATQGGLFLNMDVSTTLVIQDPVRDFLVSNQNVKDMYHIDWSKLCTLVSLQRYTKPLSTQ  
QRSSLVEKSRQKPQERMALKSNKYDANPMLRSSGISISTQFTQVEGRILPTPSSISVVISLQKSGNG  
QDLSPRNGRWNFNKELAQPTKIDPWLIASFSSRCNMKTLIQDLIKCAKMKGISMGYPAEIFTENPQYM  
REPAPVRVDMISTMMSQFRRLPQFILCILPQKKNCDIYGPWKRQCLSGCGVPTQCIAPSTPV**VNDQYL**  
**TNLLK**INAKLGGLNSLLTMGYCPSLRLISTIPTLILGMDVSHGSPGRADVPSIAAVVSSRHWPSISQY  
RATVRTQSPKLEMIDSLFEPLPNSKDSGIIQACKLLDEQWHPKFMVIAQKNHHTRFLQNGSPSNVPPG  
LSPLYHLQSQVQSQAGLRITMYCWMSLAFQQMTCSNLCIPCXLAPVCYAHLAAAQVAQFIKFEDLPE  
SSSGHAAAPVPQLPSFHEKVADTMFFC

# Protein No.: I-801

**Protein name and Species:**

**S-adenosylmethionine synthase 1 OS=Elaeagnus umbellata**

**GN=SAMS1 PE=2 SV=1**

**Accession: sp|Q9AT56|METK1\_ELAUM**

**Unused ProtScore: 2.92**

**Seq Cov %: 26**

**ITRAQ Changed Ratio:**

**117: 115=E3TL: D3TL=1.60**

**116: 114=E5TL: D5TL=0.96**

**Annotated typical Precursor MS Region:**

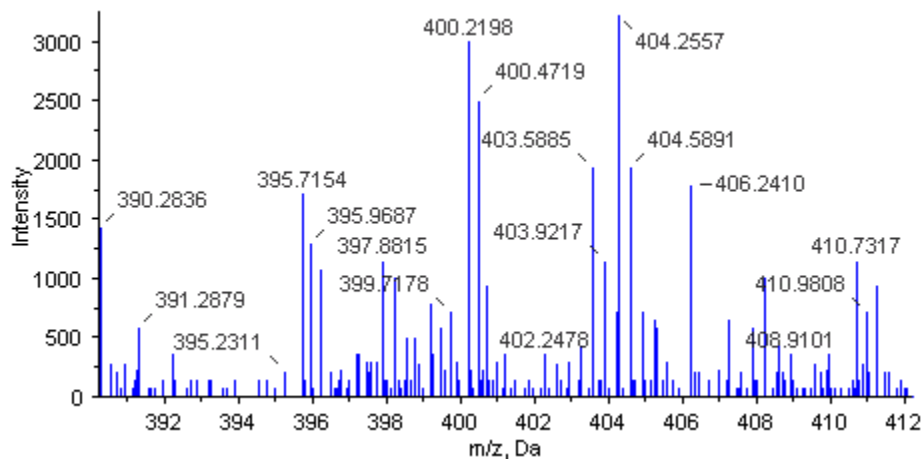

**Sequence Coverage and Matched peptides: in different color**

METFLFTSESVNEGHPDKLCDQISDAVLDACLAQDPDSKVACE**T**CSKTNMVMVFGEIT**T**KANVDY**E**KIV  
RDT**C**RAIGFVSDDVGLDADNCK**V**LVNIEQQSPDIAQGVHGH**F**TK**R**P**E**EIGAGDQ**G**HMFYATDE**T**PEYM  
PLSHVLATKLGARL**T**EV**R**KNGT**C**PWLRPDGK**T**Q**V**T**V**E**Y**YN**E**NGAM**V**P**V**R**V**HT**V**L**I**ST**Q**HDE**T**V**T**NDE**I**A  
ADL**K**EH**V**IK**P**VI**P**E**K**YL**D**E**K**T**I**F**H**LN**P**SG**R**F**V**IG**G**PH**G**DA**G**L**T**GR**K**LIID**T**Y**G**GW**A**H**G**GG**A**F**S**G**K**DP**T**  
K**V**DR**S**G**A**Y**I**VR**Q**AA**K**S**I**V**A**N**G**L**A**R**R**CL**V**Q**V**SY**A**IG**V**PE**P**LS**V**F**V**DS**Y**GT**G**Q**I**PD**K**E**I**LN**I**V**K**EN**F**D**F**R**P**  
GM**I**T**I**N**L**DL**K**RG**G**NG**R**FL**K**T**A**GY**G**H**F**GR**D**DP**D**F**T**WE**I**V**K**PL**K**WE**K**P**Q**S

# Protein No.: I-807

**Protein name and Species:**

**60S ribosomal protein L14, putative OS=Ricinus communis**

**GN=RCOM\_1169110 PE=4 SV=1**

**Accession: tr|B9SS61|B9SS61\_RICCO**

**Unused ProtScore: 2.9**

**Seq Cov %: 13.4**

**ITRAQ Changed Ratio:**

**117: 115=E3TL: D3TL=1.51**

**116: 114=E5TL: D5TL=0.33**

**Annotated typical Precursor MS Region:**

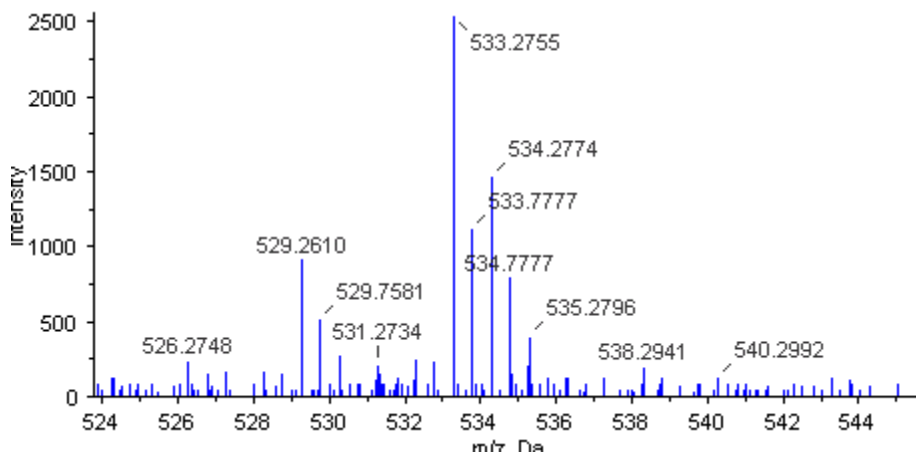

**Sequence Coverage and Matched peptides: in different color**

MPFKRYVEI~~GR~~**VALVNYGK**DYGKLVVIVDVIDQNR**ALVDAPDMVR**SQMNFKRLQLTDIKIDINRVPKKK  
**NLI**EAMEKADVKNKWESSSWGKLIIVQKRR**AALNDFDR**FK**LMLAK**IKRGGLIRQELAKLKKETAA

# Protein No.: I-808

**Protein name and Species:**

**Thioredoxin (Fragment) OS=Populus trichocarpa GN=PtrTrxh2**

**PE=3 SV=1**

**Accession: tr|B9IJS4|B9IJS4\_POPTR**

**Unused ProtScore: 2.9**

**Seq Cov %: 25.2**

**ITRAQ Changed Ratio:**

**117: 115=E3TL: D3TL=0.08**

**116: 114=E5TL: D5TL=0.30**

**Annotated typical Precursor MS Region:**

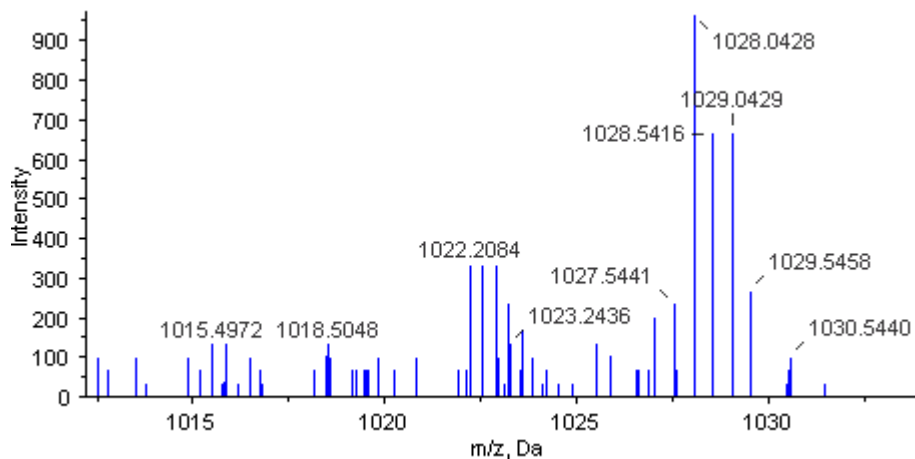

**Sequence Coverage and Matched peptides: in different color**

IGSILSYLFGASAAGEDSASDGQSGVTAF**HSSAR**WQLHFNSIKNTNQLMVIDFAASWCGPCKHMEPAVH  
AMAAK**FTDVQFAKIDVDEL**PDVA**QEFVQAMP**TFVL**VK**KGNEVDRVVGAQKEELQRKIEKHR

# Protein No.: I-813

**Protein name and Species:**

**Ras-related protein RABA6b-like OS=Populus trichocarpa**

**GN=POPTRDRAFT\_835110 PE=3 SV=1**

**Accession: tr|B9IEB2|B9IEB2\_POPTR**

**Unused ProtScore: 2.87**

**Seq Cov %: 19.8**

**ITRAQ Changed Ratio:**

**117: 115=E3TL: D3TL=1.77**

**116: 114=E5TL: D5TL=2.51**

**Annotated typical Precursor MS Region:**

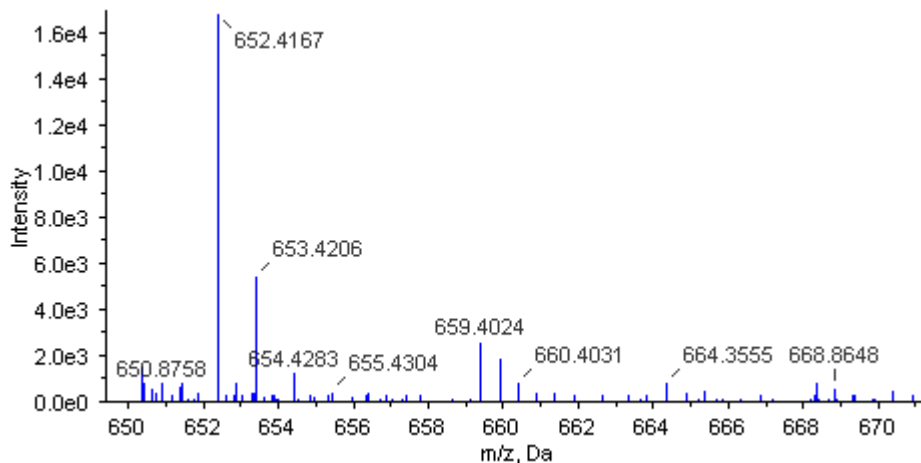

**Sequence Coverage and Matched peptides: in different color**

**MADSYDEECDYL~~FKAVLIGDSAVGKSNLLSR~~FSRDEFRLDSKPTIGVEFAYRNIRVGD~~KL~~IK~~QA~~IWD~~TA~~**  
**GQERFRAITSSYR~~GALGALLVYD~~ITRRATFDNVKKWLHEL~~RDFGSSDMVVVLVGNKSD~~ISH~~LRE~~V~~DE~~D**  
**DGKNLAETEALYFMETSALENLNVEEAFMQMITRIHEIASQKSLEAKKNETTISTIKALPVGKEVINID**  
**DEVSATKQASYCCSY**

# Protein No.: I-817

**Protein name and Species:**

**Pro-hevein OS=Hevea brasiliensis GN=HEV1 PE=1 SV=2**

**Accession: sp|P02877|HEVE\_HEVBR**

**Unused ProtScore: 2.85**

**Seq Cov %: 65.7**

**ITRAQ Changed Ratio:**

**117: 115=E3TL: D3TL=0.62**

**116: 114=E5TL: D5TL=0.34**

**Annotated typical Precursor MS Region:**

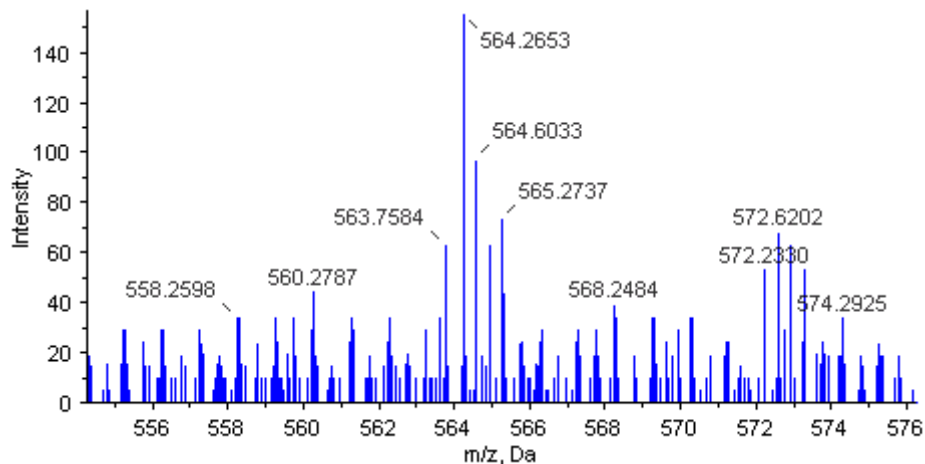

**Sequence Coverage and Matched peptides: in different color**

MNIFIVVLLCLTGVAIA**EQCGRQAGGK**LCPNNLCCSQWGWCGSTDEYCSPDHNCQSNCKDSGEGVGGGS  
**ASNVLATYHLYN**SQDHGWDLNAASAYCSTWDANKPYSWR**SKYGWTAFCGPVGAHGQSSCGKCLSVTNTG**  
**TGAKTTVRIVDQCSNGLDL**DVNVFRQLD**TDGKGYERGHITVNYQFVDCGDS****FNPLFSVMKSSVIN**



## Protein No.: I-819

**Protein name and Species:**

**Monodehydroascorbate reductase I OS=Pisum sativum**

**GN=MDHAR1 PE=4 SV=1**

**Accession: tr|Q66PF9|Q66PF9\_PEA**

**Unused ProtScore: 2.84**

**Seq Cov %: 14.3**

**ITRAQ Changed Ratio:**

**117: 115=E3TL: D3TL=1.96**

**116: 114=E5TL: D5TL=1.18**

**Annotated typical Precursor MS Region:**

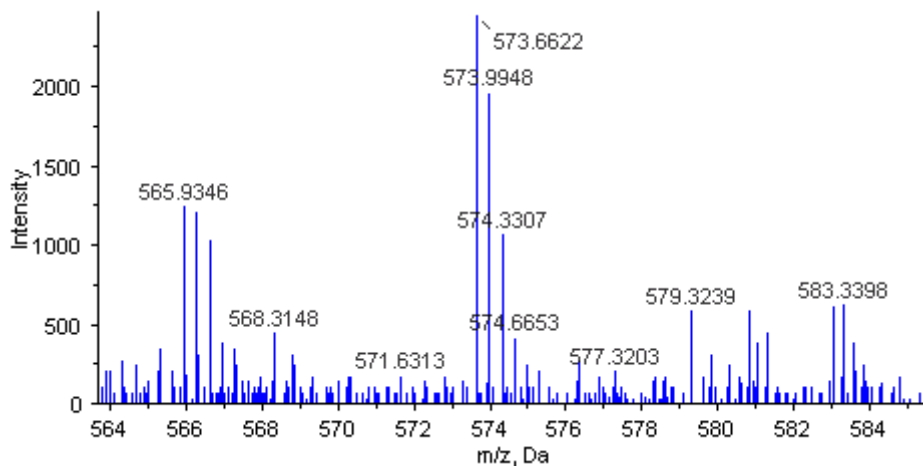

## Sequence Coverage and Matched peptides: in different color

MVHSFKYILIGGGVSAGYAAREFVKQGVHPGELAIISK EAVAPYERPALSKAYLFPESPARLPGFHTCV  
GSSGERLLPEWYSEKGIQLYLSTEIVSADLAAKFLKSANGEHFDYQTLVIATGSAVIRLTDGFIGANA  
KNIFYLREVDADKLYEAIKRKKNAKAVVGGGYIGLELSAVLKLNDLDVTMVYPEPWCMPRLFTSEIA  
AFYEGYYANKGINIKGTAVGFTANS DGEVKEVKLKDGRVLEADIVIVGVGGRPQISLFGQVEEQHG  
GIKTDSFFKTSVPDVYAVGDVATFPLKLYNDVRRVEHVDHARKSAEQAAKVI FAADVRKSV E EYDYL PY  
FYSRSFDLSWQFYGDNVGETVLF GDNDPASSKPKFGTYWIK EGKVVGAFLEGGTPDENKAI AKV ARAKP  
AVEDVNQLAEEGLSFASKI

## Protein No.: I-825

### Protein name and Species:

eukaryotic initiation factor 4A-3-like [Vitis vinifera] OS=Vitis  
vinifera GN=VIT\_06s0080g00550 PE=4 SV=1

Accession: tr|F6HHF5|F6HHF5\_VITVI

Unused ProtScore: 2.81

Seq Cov %: 11.8

### ITRAQ Changed Ratio:

117: 115=E3TL: D3TL=1.72

116: 114=E5TL: D5TL=1.18

### Annotated typical Precursor MS Region:

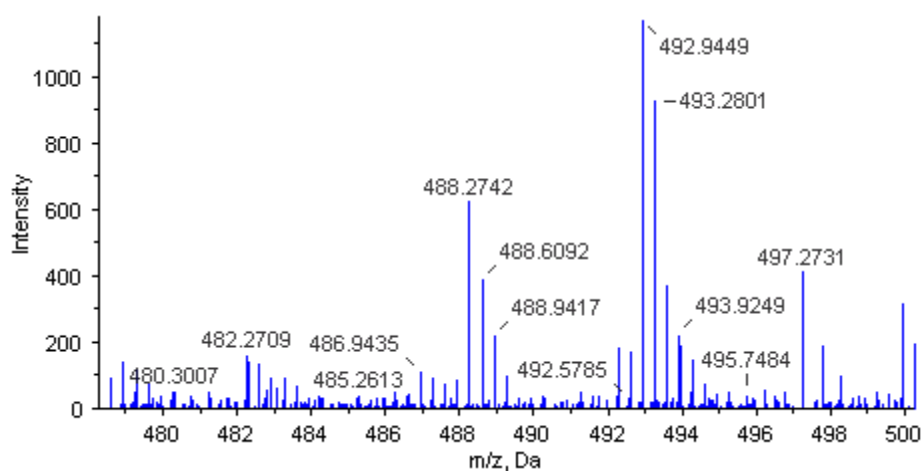

## Sequence Coverage and Matched peptides: in different color

MAAAATASVVPANRGGRRNGAVDDEKLVFETTEGVEPIMSFDQMGIKD DLLRGIYAYGF EKPSAIQQR  
A  
VLP I IQGRDVIAQAQSGTGK TSMIALTVCMVDTSNREVQALILSPTR ELASQTEKVILAIGDFINIQA  
HACIGGKSVGEDIRKLEYGVHIVSGTPGRVCDMIKRRRTLRTRAIKLLVLDESDEMLSRGFKDQIYDVYR  
YLPPELQVVLISATLPNEILEITNKFM TDPVRILVKRDEL TLEGIKQFFVAVEREEWKFDTLCDLYDTL  
TITQAVIFCNTKRKVDWLTEKMRSNNFTVSSMHGDM PQKERDAIMAEFRSGTTRVLIITD VWARGLDVQ  
QASHVSLVINYDLPNNRELYIHRIGRSGRFGRKGVAINFVKTDDIKILRDIEQYYSTQIDEMPMNVADL  
I

# Protein No.: I-827

**Protein name and Species:**

**Ribosomal protein L5A, 60S [Hevea brasiliensis] OS=Populus  
trichocarpa GN=POPTRDRAFT\_732569 PE=3 SV=1**

**Accession: tr|B9IAZ4|B9IAZ4\_POPTR**

**Unused ProtScore: 2.81**

**Seq Cov %: 7.7**

**ITRAQ Changed Ratio:**

**117: 115=E3TL: D3TL=0.31**

**116: 114=E5TL: D5TL=0.35**

**Annotated typical Precursor MS Region:**

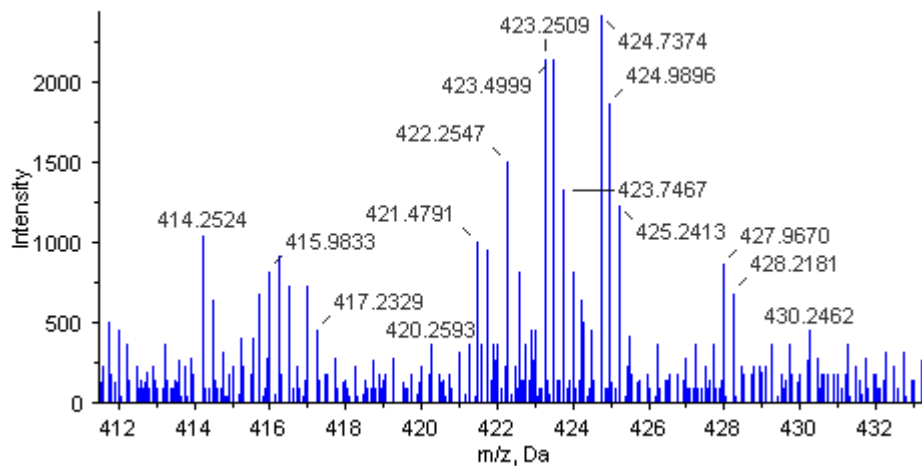

**Sequence Coverage and Matched peptides: in different color**

MAFAKAQKSRAYYKRFQVKFKRRREGKTDYRARIRLINQDKNKYNTPKYRFVMRFTNKDITAQIIHASM  
AGDIVVAAAAYSHELPRYGLEVGLTNYAAAAYCTGLLLARRVLKCKLEMDEEYEGNVEATGEDYSVEPADSR  
RPFRA**ALLDVGLVR**TTTGNR**VFGALKGALDGGLDIPHS**DKRFAGFNKDGK**QLDAEVHR**KYIYGGHVAAAYM  
RNLMEDEPEKYQSHFSEYIK**RGIEPDNMEELYK**KVHAAIRADPTAKKSEKQLPKEHKRYNLKCLTYEER  
KAKLVERLKA**LNSA**ADDDDEDE

# Protein No.: I-828

**Protein name and Species:**

**60S ribosomal protein L23A-like [Glycine max] OS=Glycine  
max PE=2 SV=1**

**Accession: tr|C6SZQ3|C6SZQ3\_SOYBN**

**Unused ProtScore: 2.81**

**Seq Cov %: 13.3**

**ITRAQ Changed Ratio:**

**117: 115=E3TL: D3TL=1.75**

**116: 114=E5TL: D5TL=0.48**

**Annotated typical Precursor MS Region:**

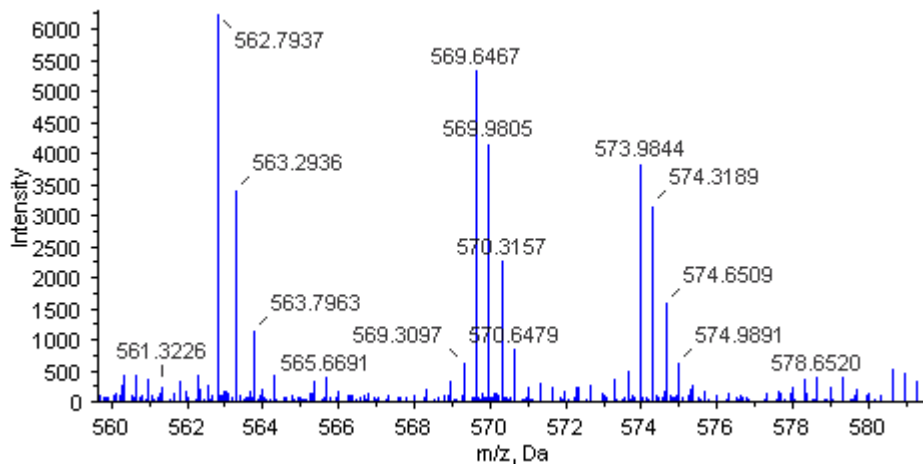

**Sequence Coverage and Matched peptides: in different color**

MAPKVDKKNDPKAQALKTAKAVKSGATFKKKVKKIRTSVTFHRPKTLKKDRNPKYPRISAPPRNKLDHY  
QILKYPLTTESAMKKIEDNNTLVFIVDLRADKKKIKDAVKKMYDIQAKKVNTRLIRPDGTKKAYVR LTPD  
YDALDVANKIGII

## Protein No.: I-832

**Protein name and Species:**

**Long chain acyl-CoA synthetase 1-like OS=Populus trichocarpa**

**GN=POPTRDRAFT\_850795 PE=4 SV=1**

**Accession: tr|B9GSW4|B9GSW4\_POPTR**

**Unused ProtScore: 2.78**

**Seq Cov %: 3.5**

**ITRAQ Changed Ratio:**

**117: 115=E3TL: D3TL=2.21**

**116: 114=E5TL: D5TL=1.97**

**Annotated typical Precursor MS Region:**

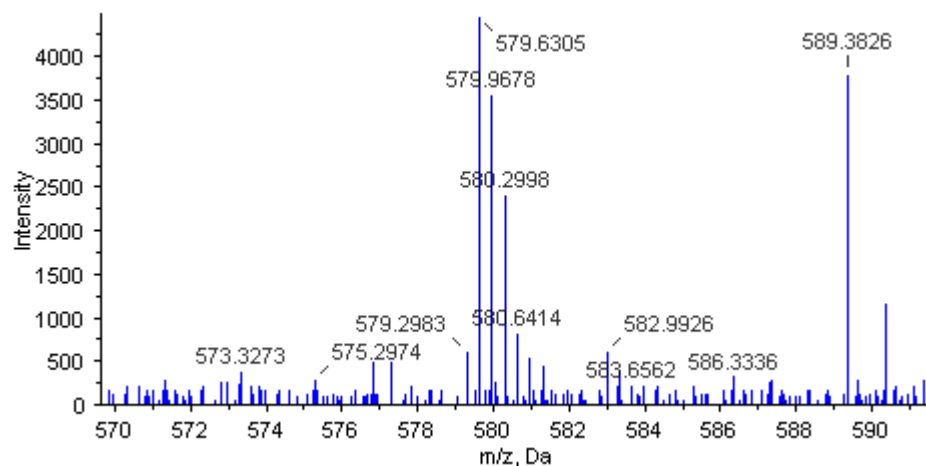

## Sequence Coverage and Matched peptides: in different color

MALKAFAAQVEEGREGK**DGKPSVGPVYR**NLLSKKEYPPLDRDVTTSWDFSSSAKKYPEYKMLGWRKFV  
DGKVGOPYVWKTYKEVYDEVLQISSALRASGAEPGYRVGIYGSNCPQWIEAMEACNAQSLVCVPLYDTIG  
PRAVNFIIIDHAEIDFVVFVQDKKVKELLDPCASQAQLKAIVCFTSLTEEEKDRAAQMGIKSYSWEEYLC  
MGKENPSEIFPPQPL**SICTIMYTSGTSGDPK**GVVILHETVAAFVRGIDLFMEQFEDKMTTDDVYLSFLP  
LAHVLDRMIEEYFFFRK**GASVGYHGDNLALR**DDLMEKPTCLAGVPRVFEKIQEGMEIPIKALQELSPL  
RRNIFDVLRYKLGWMNRGYRQK**YASPLADLLAFR**KVKAKLGGRLRLIICGGASLSTEVEEFLRVTS  
CA  
FVIQGYGLTESCGPATMAFPDEMCLGTVGAVAVYNDLCLLEVPENGYDPLGNPPCGEICLRGK**TLFSG**  
**YYKNPELTR**ESMKDGFHTGDI GEILPNGVVKIIDRKKNLIKLSQGEYIAIEYLENVYNNTPIVEDIWI  
YGDSCSMLVAVVVLHEENTKSWAYLNGHMGSFTELC SLHQLQK**LVLSELK**TTAERNKLGFEHIKGV  
L  
LESCPFDIEK**DLVTATLK**KKRNK**LVSHYRVEIDELYQK**LAEGRA



## Protein No.: I-835

**Protein name and Species:**

**Ubiquitin carboxyl-terminal hydrolase OS=Ricinus communis**

**GN=RCOM\_0004440 PE=3 SV=1**

**Accession: tr|B9T7A3|B9T7A3\_RICCO**

**Unused ProtScore: 2.77**

**Seq Cov %: 8.1**

**ITRAQ Changed Ratio:**

**117: 115=E3TL: D3TL=1.51**

**116: 114=E5TL: D5TL=1.02**

**Annotated typical Precursor MS Region:**

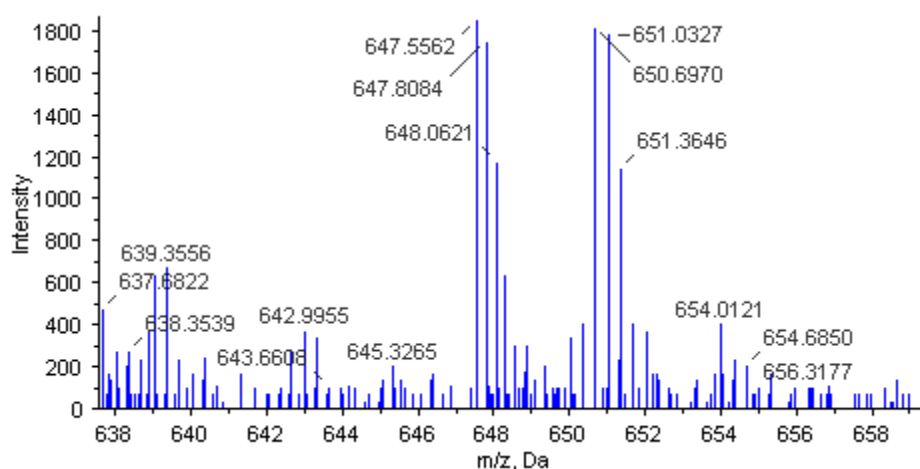

## Sequence Coverage and Matched peptides: in different color

MLSVSVKWKQKKVFPQVEIDTSQPPYLFKQCQLFDLTGVPPERQKIMVKGGLLKDDADWATVGVKEGQK**LM**  
**MMGTADEIVK**APEK**GPVFMEDLPEEEQVAVGH**TAGLFNLGNTCYMNSTVQCLHSVPELKSALVKYPSD  
RRNDLDQTSHML**TTATRELFNELDK**SVKPVAPMQFWMVLRKKYPQFGQLHNGLFMQQDAEECWTLQLLYT  
LSQSLRPPSPSENPDTVKELFGIDLVS**IHCQESGEESSETESVYSLK**CHISQDVNHLHEGLKHGLKSE  
LEKASPSLGRSAIYKESCINDLPR**YLTVQFVR**FFWKRESNQKAKILRKVDYPLELDVYDFCSADLRKQ  
LEAPRQILRDEEGRK**LGLK**VNEKSSGSKDNDVKMTDAEGPSSGSGESSKATSEEGESSHKVSSLTGIYD  
LVAVLTHKGRSADSGHYVAWVKQESGK**WIEYDDNP****IPQR**EEDITKLSGGGDWHMAYICMYKARAVPM

## Protein No.: I-838

**Protein name and Species:**

**Tubulin beta-7 chain OS=Arabidopsis lyrata subsp. lyrata**

**GN=TUB7 PE=3 SV=1**

**Accession: tr|D7LLA4|D7LLA4\_ARALL**

**Unused ProtScore: 2.76**

**Seq Cov %: 6**

**ITRAQ Changed Ratio:**

**117: 115=E3TL: D3TL=0.63**

**116: 114=E5TL: D5TL=1.29**

**Annotated typical Precursor MS Region:**

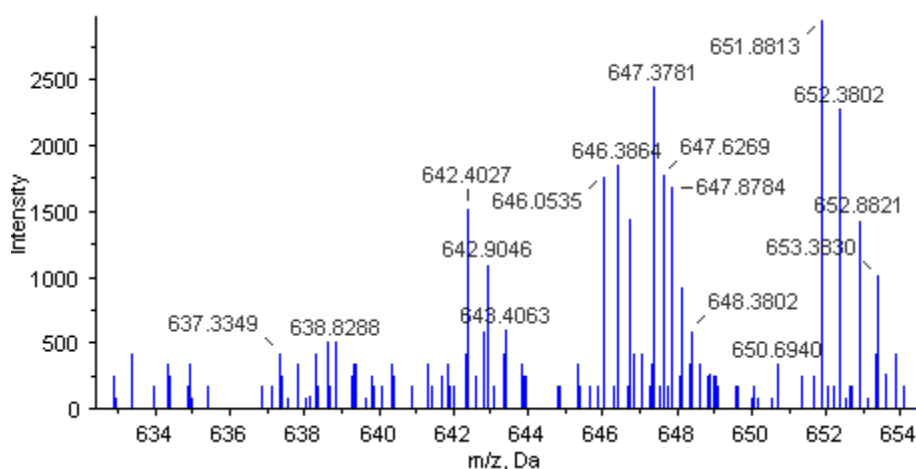

## Sequence Coverage and Matched peptides: in different color

MR**EILHIQGGQCGNQIGSK**FWEVFNLEHGIDQTGRYHGDSDLQLERVNVYNEASCGRYVPR**AVLMDLE**  
**PGTMDSVR**SGPYGQIFRPDNFVFGQSGAGNNWAKGHYTEGAELIDSVLDVVRKEAENCDCLOGFQVCHS  
LGGGTGSGMGTLTLLISK**IREEYPDR**MMMTFSVFPSPKVSDTVVEPYNATLSVHQLVENADECMVLDNEAL  
YDI**CFRT**LKLSSTPSFGDLNHLISATMSGVTCCLRFPQQLNSDLRK**LAVNLIPFPR**LHFFMVGFAPLTSR  
GSQQYRNLTVPCLTQQMWDAKNMMCAADPRHGRLTASAMFRGKMSTK**EVDEQMLNVQNKNSSYFVEWI**  
**PNNVK**STVCDIPPTGLKMASTFIGNSTSIQEMFRRVSEQFTAMFRRKAFLHWYTGEGMDEMEFTEAESN  
MNDLVSEYQQYQDATA**DEEGE**YEDEEAEEYEQEEGY

## Protein No.: I-839

**Protein name and Species:**

**Dipeptidyl peptidase IV, putative OS=Ricinus communis**

**GN=RCOM\_1243220 PE=4 SV=1**

**Accession: tr|B9RSG5|B9RSG5\_RICCO**

**Unused ProtScore: 2.75**

**Seq Cov %: 6.8**

**ITRAQ Changed Ratio:**

**117: 115=E3TL: D3TL=1.77**

**116: 114=E5TL: D5TL=0.98**

**Annotated typical Precursor MS Region:**

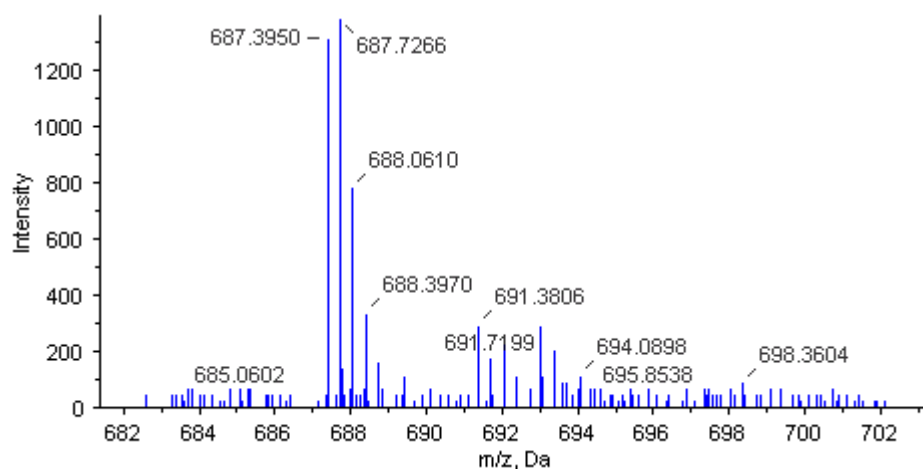

## Sequence Coverage and Matched peptides: in different color

MADNTTPQNLDDCILFPVEDIVQSPLPGYGAPTSISFSPDDALITFLFSRK**VFAFDLK**TFK**QELFFSPP**  
**DGGLDESNISPEEK**LRRERSRERGLGVTQYEWVKTSFKKKAVMVPLPAGIYFQELSSSKPELKLPSPL  
SPIIDPHLSPDGTMLAYVK**DSELHVLNLLYNESK**QLTFGSQGNTVTHGLAEYIAQEEMDRKNGYWWSLD  
SKFIAFTQVDSSGIPLFRIMHQGKSSVGLSQEDHAYPFAGASNVKVR LGVVS IAGGSITWMDLVCGGT  
EELDNEDEYLTRVNWMRGDILTAQVLNRSHTKLR I IKFDIKTGQGVILVEEQDKWVNLHDCFTPLDKS  
VTKYSGGFIWASEKTGFRHLYLHDANGTCLGPITEGEWMVEQIAGVNEAAGLVYFTATLDGPLEFNLYC  
TKLFRDSDQNFLGVPVRLTHGKGKHVVVLDHHR**NFVDIHDSLDFPPR**VLYTSLHDGSVIMPLYEQPFTI  
PRFKRLELEPPEIVQVQASDGTILYGALYKPDPTKFGPPPYKTLISVYGGPCVQYVCD SWLNTVDMRAQ  
FLRSKGILVWKL DNR**GSARRGLK**FEGSLKYNAGRIDAEDQLTGTEWLIKQGLAKVGHIGVYGWSYGGYM  
SAMILARFPDVFRCAVSGAPVTSWDGYDTFYTEKYMGLPSQNPSGYEYSSVMHHVHKLKGRLLLLVHGMI  
DENVHFRHTARLVNALVAAGKPYELLI FPDERHTLRWHR SRVYMEERI**WEFVER**SL

# Protein No.: I-840

**Protein name and Species:**

**Glutathione-s-transferase theta, gst, putative OS=Ricinus communis GN=RCOM\_1299540 PE=3 SV=1**

**Accession: tr|B9S069|B9S069\_RICCO**

**Unused ProtScore: 2.75**

**Seq Cov %: 16.7**

**ITRAQ Changed Ratio:**

**117: 115=E3TL: D3TL=0.38**

**116: 114=E5TL: D5TL=1.15**

**Annotated typical Precursor MS Region:**

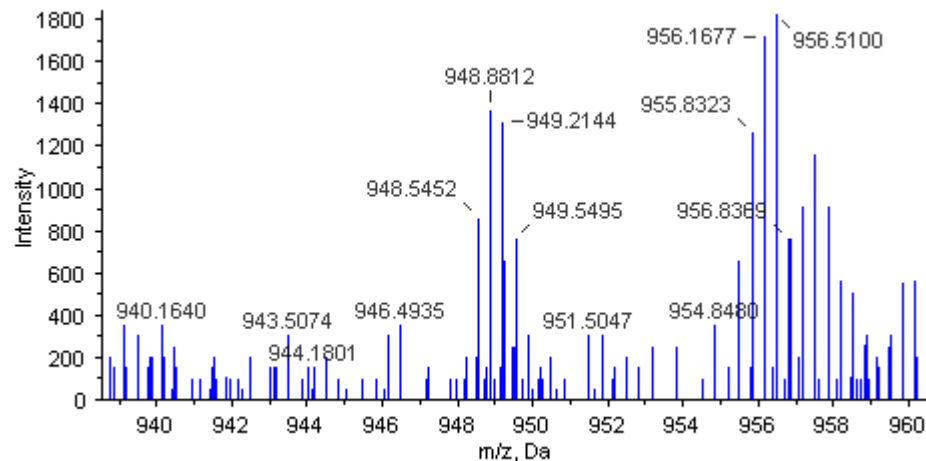

**Sequence Coverage and Matched peptides: in different color**

MSSVEGKLLKLYSYWRSSCSRVR**I**AL**N**L**K**G**I**S**Y**Q**Y**I**P**V**N**L**V**KGEQ**F**T**P**E**F**L**K**L**N**P**I**G**Y**V**P**V**L**V**D**G**D**I**V**I  
SDSFA**I**L**M**Y**L**E**D**K**Y**P**Q**H**P**L**L**P**S**D**L**Q**K**K**A**I**S**I**Q**A**A**N**I**V**S**S**S**I**Q**P**L**Q**N**L**A**V**L**K**F**I**E**E**K**V**G**P**D**Q**K**V**P**W**Q**F**H**  
I**E**K**G**F**T**A**L**E**K**L**L**K**D**H**A**G**K**Y**A**T**G**D**E**V**S**L**A**D**V**F**L**E**P**Q**I**H**A**A**I**N**R**F**D**V**D**M**N**K**F**P**L**L**L**R**L**H**E**A**Y**N**E**L**P**A**F**Q**N**G  
M**P**D**K**Q**L**D**A**P**S**S**S**S

# Protein No.: I-844

**Protein name and Species:**

**Pyridoxine kinase, putative OS=Ricinus communis**

**GN=RCOM\_1384840 PE=4 SV=1**

**Accession: tr|B9S7R8|B9S7R8\_RICCO**

**Unused ProtScore: 2.72**

**Seq Cov %: 16.4**

**ITRAQ Changed Ratio:**

**117: 115=E3TL: D3TL=0.61**

**116: 114=E5TL: D5TL=0.51**

**Annotated typical Precursor MS Region:**

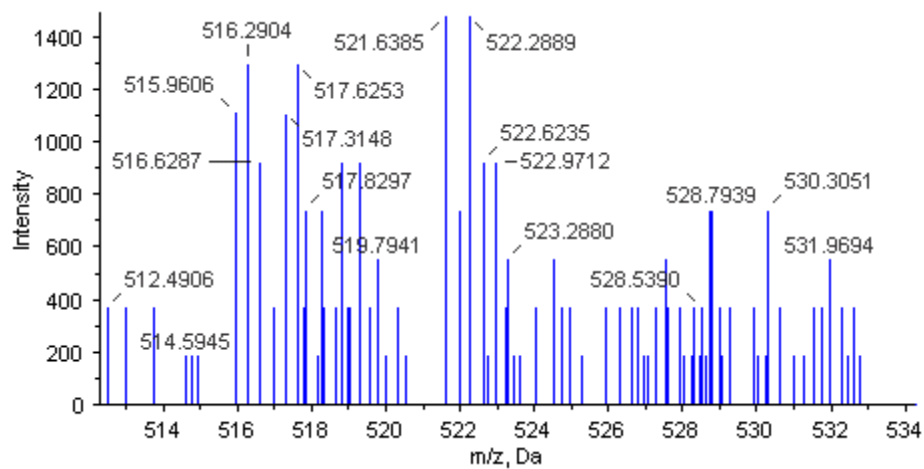



## Sequence Coverage and Matched peptides: in different color

MAPPILSLALPSGTGRVLSIQSHTVQGYVGNKSAVFPLQILGYDVPINSVQFSNHTGYPSVKGQVLNG  
QQLWDLIEGLEGNLLYYTHLLTGYIGSVSFLNTILEVVNKLRSINPKLTYVCDPVMGDEGKLYVPEL  
VAVYREKVVVPVASM LTPNQFEAEQLTGFRIVTEKDGREACNTLHAAGPSKVIITSINIDGNLLLVGSHQ  
KEKDQPPEQFKI EIPKIPAYFTKYPDNLGTAAELAVSSLQALLQRTVNDYRSVGYDPQSSSLEIRLIQS  
QDDIRHPQVKFKAEKYD

## Protein No.: I-845

**Protein name and Species:**

**rhamnogalacturonate lyase OS=Populus**

**Accession: [tr|B9H6S4|B9H6S4\\_POPTR](#)**

**Unused ProtScore: 2.72**

**Seq Cov %: 8.4**

**ITRAQ Changed Ratio:**

**117: 115=E3TL: D3TL=0.21**

**116: 114=E5TL: D5TL=0.18**

**Annotated typical Precursor MS Region:**

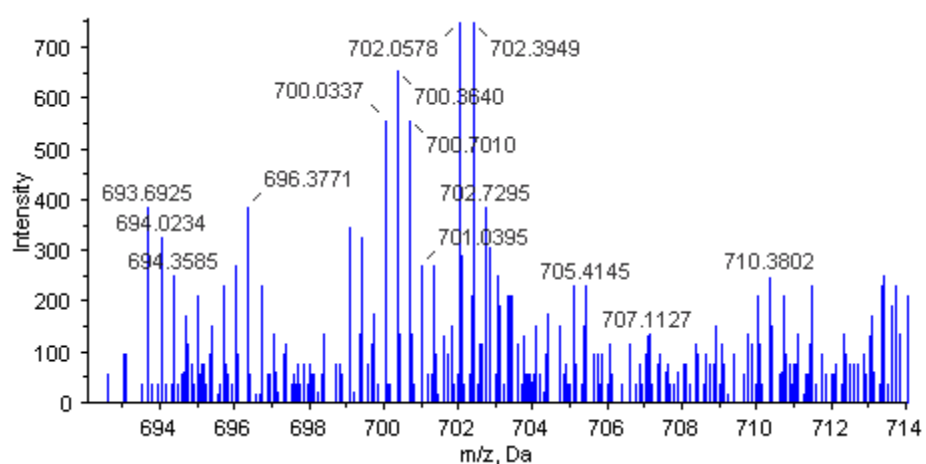

## Sequence Coverage and Matched peptides: in different color

MDNGIVQVTLSPAGIVTGIR**YD****GIDN****LLEVLNR**ETNRGYWDLHWNPPGGNGIFDVISGTSFRVVVEND  
EQVELSFTRMWDSSLEGKYIPLNIDKRFILLRGSSGFYSYAIYEHLQEWPGFDIGETRITFKLRK**DKFQ**  
**YMAIADNR**QRLMPLPDDRLPGR**CQALAYPEAVILVNP****K**LPELTGEVDDKYQYSCENKDNQVHGW**ICFK**P  
PVGFWQITPSDEFRTAGPLKQNLTSHVGP TTLAMFHSSHYAGKDLVLSISPGE PWKKVFGPVFIYLN  
SNGEDPLFLWEDAKMQMMAEVQSWPYSFPASEDFQKSEQRGNVCGRLLVKDRNISDDYILASGAYVGLA  
PPGDVGSWQTECKDYQFWTR**ADENGYFSIK**NIRTDYNYLYAWVPGFLGDYRWDIVNIISGCDMDMGDL  
VYEPPR**DGPTLWEIGIPDR**SAAEFYIPGDPKFMNLYANHPDRFRQYGLWGRYADLYPDTDLVYTVGL  
SDYRKDWFFAQVVRKDDDTQVGTWQIKFKLDKVDNRSSYKLRVAIASATLAELQVRVNDAKAQRPLF  
TSGLIGRDNAIARHGIHGLYR**LYNVNIPGARLVEGENTIFLTQPR**CTSPFQGLMY**DYIR**LEGPFFSGSS  
NEASSSFK

## Protein No.: I-864

**Protein name and Species:**

**Glutaredoxin, grx, putative OS=Ricinus communis**

**GN=RCOM\_0936190 PE=4 SV=1**

**Accession: tr|B9RZ84|B9RZ84\_RICCO**

**Unused ProtScore: 2.65**

**Seq Cov %: 9.4**

**ITRAQ Changed Ratio:**

**117: 115=E3TL: D3TL=0.62**

**116: 114=E5TL: D5TL=1.00**

**Annotated typical Precursor MS Region:**

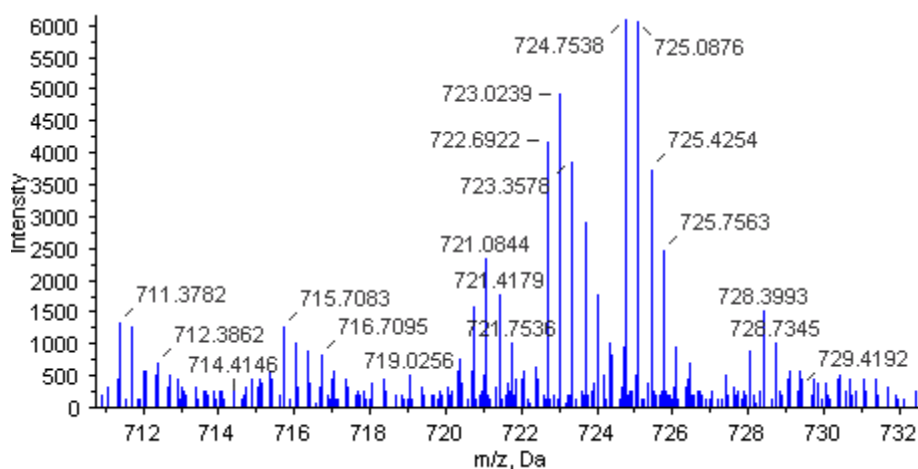

## Sequence Coverage and Matched peptides: in different color

MGGSVKEVHSKTELDVDRSSGVPVIVHFWASWCDASKHMDQVFSHLSTDFPNAHFLRVEAEEQPEISEE  
FSVSAVPFFVFFKDGKKVDSLEGADPSSLANKVAKAAGSVKSGEPAAPASLGMAAGPSILETVKELAKD  
NGPSQVSNKVQPGLNDALEKRLQQLINSHPVMLFMKGSPEAPRCGFSQKIVDILKDEAVKFGSFDILSD  
NEIREGLKKFSNWPTFPQLYCKGELLGGCDIAIAMHESGELKDVFRDHGVDTNSSSEEVKVSEGGNGKGG  
ISESTGLSSTLTSRLES LINSSPVMLFMKGPDEPKCGFSRKVVDILREEKVNFDSDILSDDEVRQGL  
KVYSNWSSYPQLYIKGELIGGSDIVLEMQKSGELKRVLVEKGISPKGTLEDRLRSLVASSHVMLFMKGS  
PDAPRCGFSKVVNALREEGVSFGSFDILSDDEVRQGLKVFSNWPTFPQLYYKGELIGGCDIIMELKNN  
GELKSTLSE

# Protein No.: I-868

**Protein name and Species:**

programmed cell death protein 5-like [Vitis vinifera] OS=Vitis  
vinifera GN=VIT\_10s0003g02790 PE=4 SV=1

**Accession:** tr|D7TK03|D7TK03\_VITVI

**Unused ProtScore:** 2.65

**Seq Cov %:** 23.5

**ITRAQ Changed Ratio:**

**117: 115=E3TL: D3TL=0.54**

**116: 114=E5TL: D5TL=0.47**

**Annotated typical Precursor MS Region:**

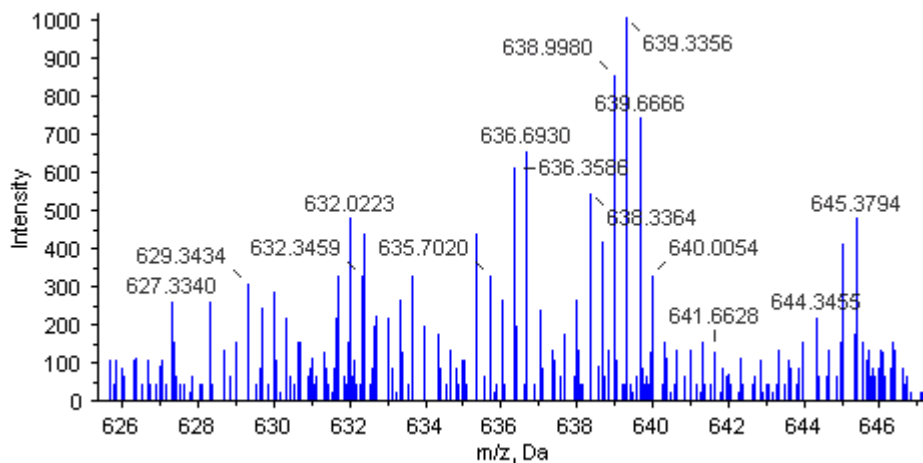

**Sequence Coverage and Matched peptides:** in different color

MQELMAQHGVGNHQNSEQQKAQEDAKREADERRQ**MLLSQILSSEAR**ERLAR**I**ALVK**PEKAR****GV**EDVLLR  
AAQMGQIVEK**VSEERLISLLEQINNQ**TKQTKVTIQRRRSVLEDD

## Protein No.: I-869

### Protein name and Species:

14 kDa zinc-binding protein-like [Vitis vinifera] OS=Vitis  
vinifera GN=VITISV\_029944 PE=4 SV=1

Accession: [tr|A5BDT4|A5BDT4\\_VITVI](#)

Unused ProtScore: 2.64

Seq Cov %: 5.7

### ITRAQ Changed Ratio:

117: 115=E3TL: D3TL=0.30

116: 114=E5TL: D5TL=0.34

### Annotated typical Precursor MS Region:

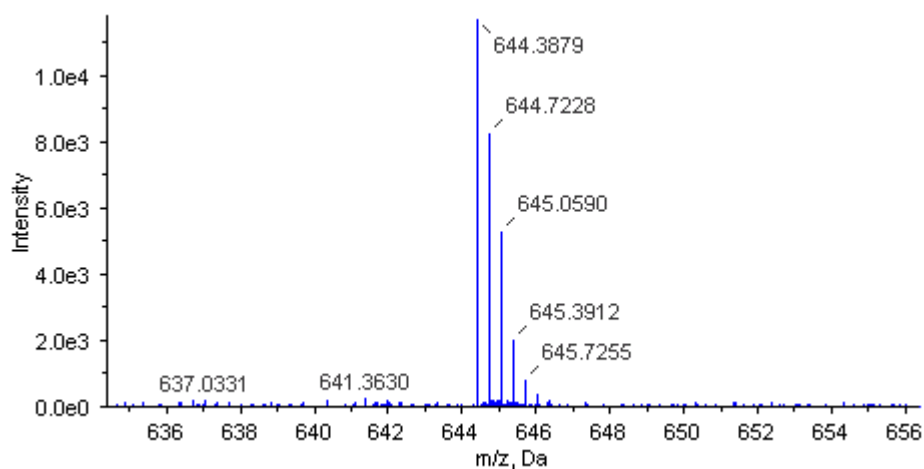

## Sequence Coverage and Matched peptides: in different color

MNPSNKSRNQSRVGDINSRLGVIASHLSSAYMASEK**GAAVAATPSDSPTIFDKIINK**EIPATIVYEDDK  
VLAFR**DIAPQAPTHILLIPK**VK**DGLTGLSK**YIFSSVLYTGQLKTPRHKCYCALHFERTAIHETCYCFL  
RFNLGESLSLNMGLTLGCICSVDLVMEVGR**LLANWR**RHYMSIGSRVTFNRVLLIKCSYALHILLIPG  
SIRNTWEIGDGFSLVRVRPRELFDWLELGV**VLAIR**DLERMTEALLGKWLWKFVVEXDSSXRVFESQC  
CYSRELRFDFVCGDHGTQSLPMVQPMRGGRITPTRLACARRMGRAWIYQFPRNSEAYVGKLTWTIWQV  
VLMVFRGFMXFIFQAEERHSVILGH**LLYTAK**LVAK**QEGLEDGFR**IVINDGPSACQSVYHIHVHLLGGRQ  
MNVPPG



## Protein No.: I-870

**Protein name and Species:**

**Adenylosuccinate synthetase 2, chloroplastic OS=Ricinus  
communis GN=PURA2 PE=3 SV=1**

**Accession: sp|B9SL58|PURA2\_RICCO**

**Unused ProtScore: 2.64**

**Seq Cov %: 7.2**

**ITRAQ Changed Ratio:**

**117: 115=E3TL: D3TL=0.53**

**116: 114=E5TL: D5TL=2.38**

**Annotated typical Precursor MS Region:**

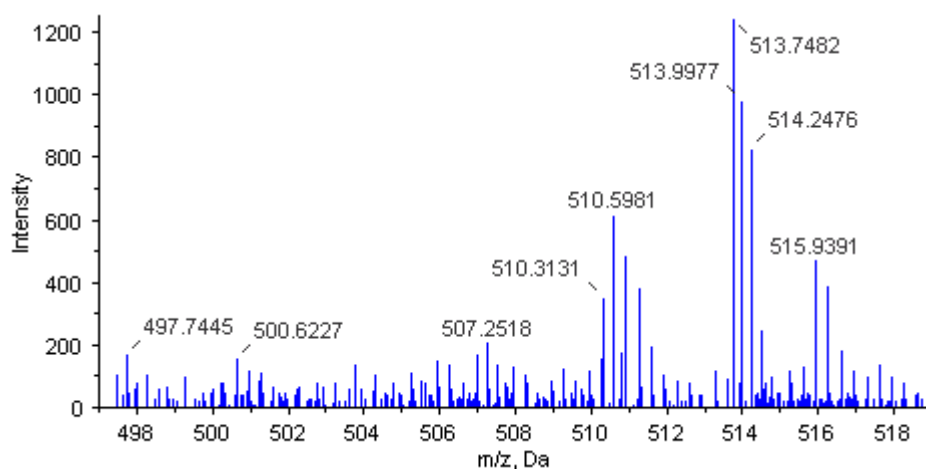

## Sequence Coverage and Matched peptides: in different color

MSFTSSLRLDTNPITSPKWVHRQVPLRPHRNFVVCSEIKSPSTPSLNLATDSASTDSLRSINSLSQVSGV  
LGCQWGDEGKGLVDILAQHFDIVAR**CQGGANAGHTIYNSEGK**KFALHLVPSGILNEDTLCVIGNGVVV  
HLPGLFKEIDGLESSGVSCTGRILVSDRAHLLFDFHQEVDGLREAELAK**SFIGTTR**RGIGPCYASKAIR  
NGIRVSDLRHMDTFPQKLDILLSDAASRFQGFYGPPEMLREEVEKYKRYAERLEPFIADTVHVMNESIE  
QKKKILVEGGQATMLDIDFGTYPFVTSSSSPSAGGICTGLGIAPRAVGD LIGVVKAYTTRVGS GPFPEI  
LGQGGDLLRFAGQEFGTTTGRPRRCGWLDIVALKYCCQINGFSSLNLTKLDVLSDLPEIQLGVAYKHAD  
GTPFKSFPADLR**LLEQLK**VEYEVLPGWKSD**ISSIR**NYAD**DFPK**AAQQYVER**IEELVGVPVHYIGVGPGRD**  
ALIYK

## Protein No.: I-871

**Protein name and Species:**

**60S ribosomal protein L4, putative OS=Ricinus communis**

**GN=RCOM\_0819810 PE=4 SV=1**

**Accession: tr|B9SGS2|B9SGS2\_RICCO**

**Unused ProtScore: 2.63**

**Seq Cov %: 11**

**ITRAQ Changed Ratio:**

**117: 115=E3TL: D3TL=2.68**

**116: 114=E5TL: D5TL=0.54**

**Annotated typical Precursor MS Region:**

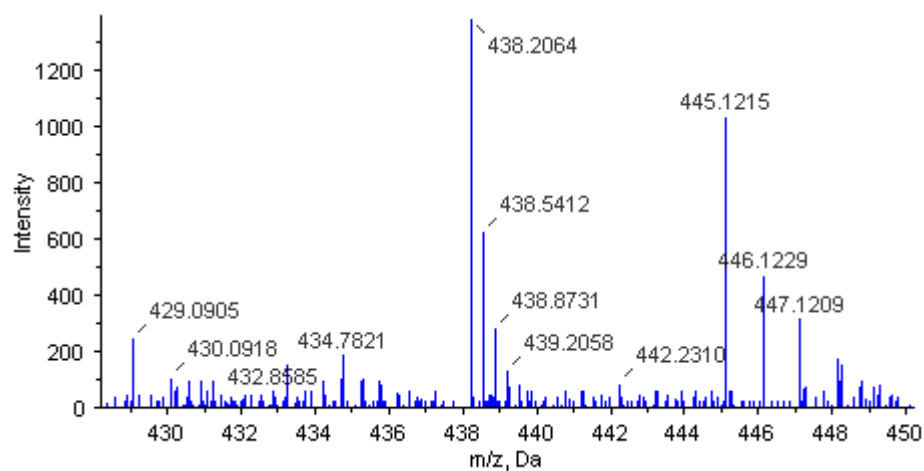

## Sequence Coverage and Matched peptides: in different color

MAAAAAAARPLVTVQSLPSQNDMATDAVTTVPLPDSMKASLRPDIVSFVHAQMSKNSRQPYAVSKRAGH  
QTSAESWGTGRAVSRIPRVPGGGTHRAGQGAFGNMCRGGRMFAPTKIWRRWHRKINVNQKRYALVSAIA  
ASAIPSLVMARGHKVESVPEMPLVISDSAESIEKTSTALKVLKEIGAYPDVEKAKDSHAIRPGKGMNRN  
RRYISRKGPLIVYGSEGAQLVKAFRNIPGVEVANVERLNLLKLAPGGHLGRFVIWTKSAFEKLDSTIYGS  
FQKSSEKKKGYVLPKSKMVNADISRINSDEVQSVVNPKEVNRAPLKKNPKNLNVMLKLNPYAKAA  
RRMSLLAEAQRVKAKKEKLDKKRKTVTKEEAAAIRAAGKAWYQTMISDSDYTEFENFSKWLNVSQ

## Protein No.: I-879

**Protein name and Species:**

**Phosphofructokinase;pyrophosphate-fructose  
1-phosphotransferase OS=Populus 6-phosphate  
trichocarpa  
GN=POPTRDRAFT\_761666 PE=4 SV=1**

**Accession: tr|B9H5X2|B9H5X2\_POPTR**

**Unused ProtScore: 2.61**

**Seq Cov %: 30.2**

**ITRAQ Changed Ratio:**

**117: 115=E3TL: D3TL=0.30**

**116: 114=E5TL: D5TL=1.01**

**Annotated typical Precursor MS Region:**

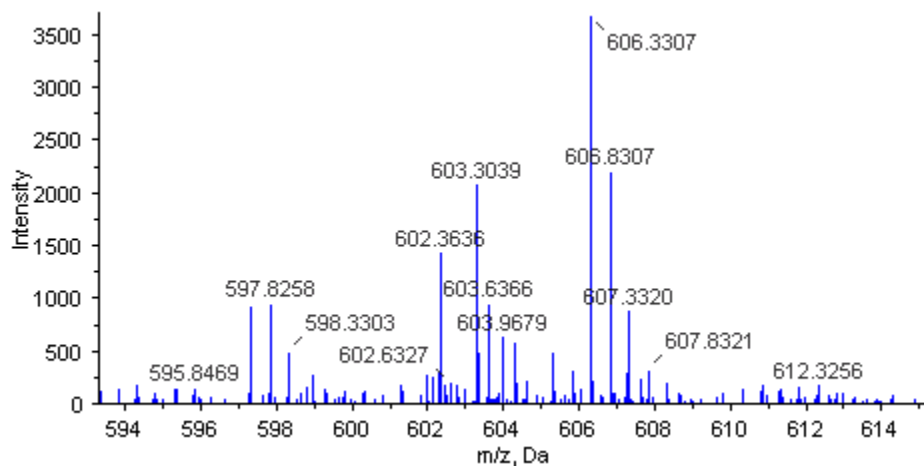

## Sequence Coverage and Matched peptides: in different color

MDSDFGIPRELSDLQKLRSLYQPELPPCLQGTAVRVELGDATTAADPADVHSISRSPFLTYGQPLAHFL  
RASAKVSDAQIITDHPAFRVGIVFCGRQSPGGHNVIWGLHNALKIHNPNSTLLGFLGGSEGLFAQKLE  
ITDDILSTYKNQGGYDLLGRTKDQIRTTEQVNAALTACKDLKLDGLVIIGGVTSENTDAAQLAETFAEAK  
CPTKVVGVPVTLNGLKNQFVETNVGFDTICKVNSQLISNVCTDALSAEKYYFIRLMGRKASHVALEC  
TLQSHPNMVLGEEVAASKLTLFDLTTQICDAVQARAVQDKNHGVILLPEGLIESIPEVYALLKEIHGL  
LRHGVAPDNISSQLSPWTSALFEFLPPYIKKQLLLHPESDDSAQLSQIETEKLLAHLVETEMNKRLKEG  
TYTGKKFNAICHFFGYQARGSLPSKFDYAYVLGHISYHILAAGLNGYMATVTNLKNPVNKWRCGAAP  
ITAMMTVKRWAQSPGASSIGKPAIHPATVDLKGKAYELLRQNAGRFWMDDLYRNPGPLQFDGPGADSKA  
VTLCVEDQDYMGGIKKLQEYLDKVRNIVKPGCSQEVLKAAALSVMSSVTDVLSVMSSTSSNGQTPL

# Protein No.: I-885

Protein name and Species:

Thioredoxin OS=Jatropha curcas PE=3 SV=1

Accession: [tr|E9JFW4|E9JFW4\\_9ROSI](#)

Unused ProtScore: 2.61

Seq Cov %: 15.3

ITRAQ Changed Ratio:

117: 115=E3TL: D3TL=1.77

116: 114=E5TL: D5TL=0.79

Annotated typical Precursor MS Region:

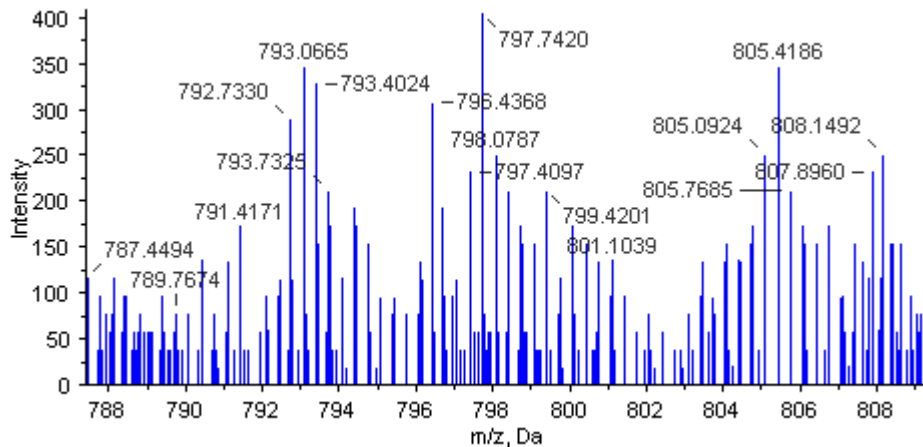

Sequence Coverage and Matched peptides: in different color

MAEEGQVIACHTVEAWNEQLEK GKESKTLIVVDF TATWCGPCR F ITP I LQDLAKKMPHV TFLKVDVDEL  
R T V A E D W A V E A M P T F M F L K E G K I V D K V V G A K K E E L Q M T I V K H A T E V A A A

# Protein No.: I-886

**Protein name and Species:**

**Nucleoside diphosphate kinase OS=Vitis vinifera**

**GN=VIT\_02s0025g01500 PE=3 SV=1**

**Accession: tr|A5BVN4|A5BVN4\_VITVI**

**Unused ProtScore: 2.6**

**Seq Cov %: 8.9**

**ITRAQ Changed Ratio:**

**117: 115=E3TL: D3TL=0.64**

**116: 114=E5TL: D5TL=0.97**

**Annotated typical Precursor MS Region:**

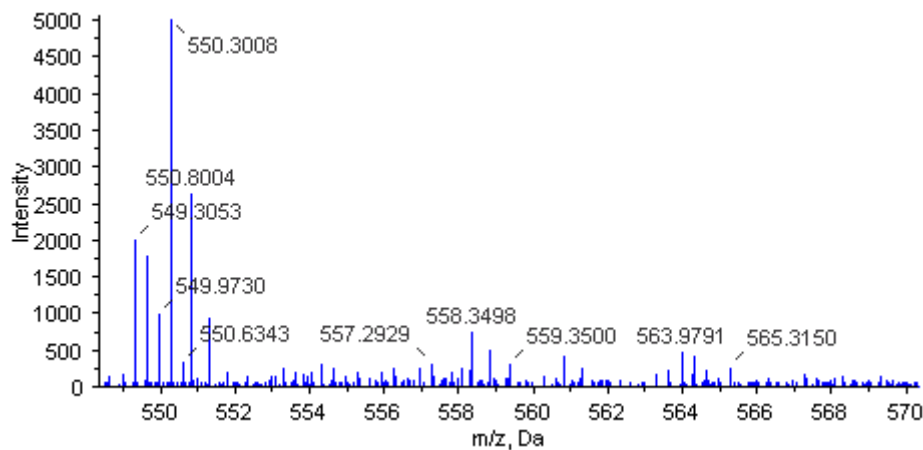

**Sequence Coverage and Matched peptides: in different color**

MSSQICRSASRAARSLLSASKSSNLLAEGRAVAAVAALSSRGKPFLLSFGNAGSGNAYRGWLSSVLALP  
AAAYMMQEQLHATEMER**TFIAIKPDGVQRGLIAEILSR**FERKGFKLVAIKIVVPSKDFAQKHYHDLKE  
RPFNGLCDFLSSGPVAMVWEGE**GVIK**YGRK**LIGATDPQKSEPGTIR**GDLAVVGRNI IHGSDGPETA  
KDEINLWFKPEELVNYSSNAEKWIYGVN



# Protein No.: I-888

**Protein name and Species:**

**Coated vesicle membrane protein, putative OS=Ricinus communis GN=RCOM\_0911000 PE=3 SV=1**

**Accession: tr|B9RTJ5|B9RTJ5\_RICCO**

**Unused ProtScore: 2.59**

**Seq Cov %: 10**

**ITRAQ Changed Ratio:**

**117: 115=E3TL: D3TL=7.31**

**116: 114=E5TL: D5TL=2.19**

**Annotated typical Precursor MS Region:**

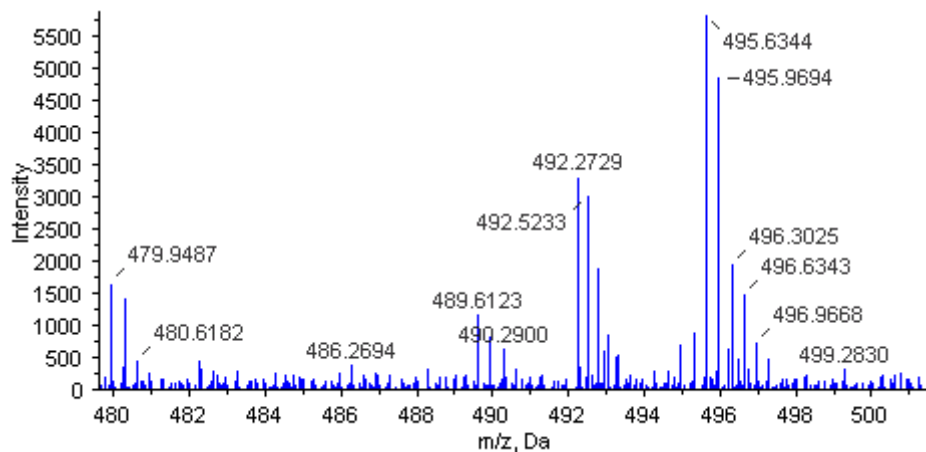

**Sequence Coverage and Matched peptides: in different color**

**MTRRQIYVVGILLMLNLI**GR ISSLSVTVNDVECVY EYVLYEGD TVSGNFVVDH DIFWSSDHPGIDLTV  
TSPADNVVHTVKGTSGDKFEFKAPRSGMYKFCFHN PYPETV SFYIHVGHIPNAHDLAK**DEHLNPI**NV  
**KIAELR****EAL****ESV****TAEQ**K YLKARDARHRR TNESTRKR VIGYTVGEY ILLGLVSTLQVVY IRR LFSKSVAY  
NRV

# Protein No.: I-900

## Protein name and Species:

Glutathione transferase GSTL3 [Populus trichocarpa]

OS=Populus trichocarpa GN=POPTRDRAFT\_281791 PE=3

SV=1

Accession: [tr|B9MT66|B9MT66\\_POPTR](#)

Unused ProtScore: 2.53

Seq Cov %: 15

ITRAQ Changed Ratio:

117: 115=E3TL: D3TL=0.47

116: 114=E5TL: D5TL=0.24

## Annotated typical Precursor MS Region:

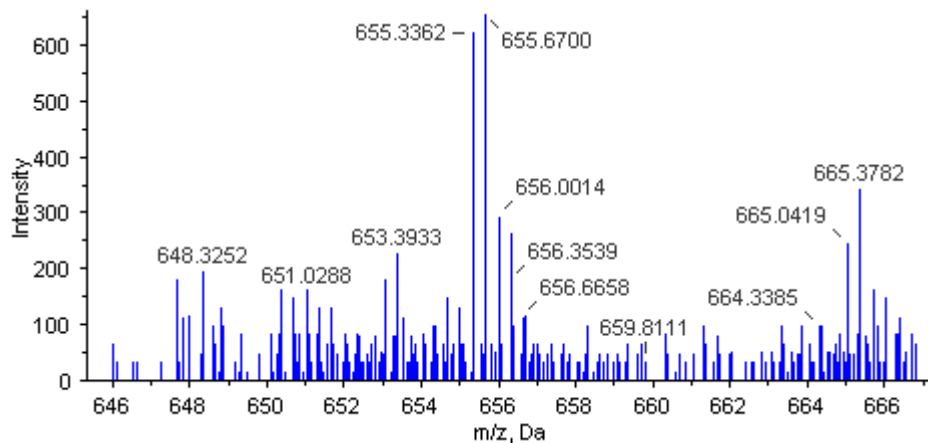

## Sequence Coverage and Matched peptides: in different color

PLDATAEQPPLFDGTTKLYTCTCPFAQRVWITRNFKGLQDEIKLVPLLILQNRPAWYPEKVYPPNKVPS  
LEHNGKITGESLDLIKYLESNFEGPSLLPKDPAKKEFAEELFSYTDKFNQTVYTAFKGDLAKEAGPAFD  
YLENALHKFDDGPFPLGKEFSLVDIAYIPFVERLNIFLLEVFKYDIAAGRQKLAAWIEEVNKEAYKQT  
KTDPKELVEFYKK

# Protein No.: I-903

**Protein name and Species:**

**177 protein OS=Arabidopsis thaliana GN=LSH10 PE=2 SV=1**

**Accession: tr|Q9S7R3|Q9S7R3\_ARATH**

**Unused ProtScore: 2.53**

**Seq Cov %: 11.9**

**ITRAQ Changed Ratio:**

**117: 115=E3TL: D3TL=0.46**

**116: 114=E5TL: D5TL=0.22**

**Annotated typical Precursor MS Region:**

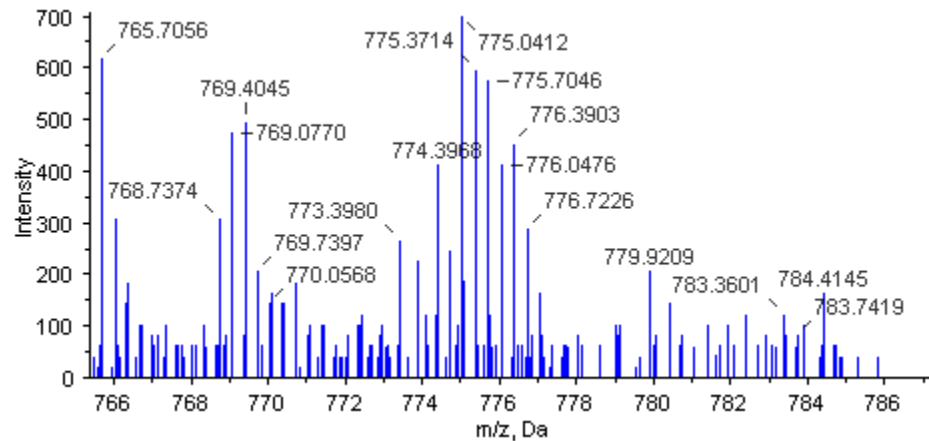

**Sequence Coverage and Matched peptides: in different color**

MSSPRERGKSLMESSGSEPPVTPSRYESQKRRDWNFTFGQYLKNQRPPVPM SHCSCNHVLDFLRYLDQFG  
KTKVHVPGCMFYGQPEPPAPCTCPLRQAWGSLDALIGRLRAAYEENGPPETNPFASGAIRVYLREVRE  
CQAKARGIPYKKKKKKKPTPEMGGGREDSSSSSSSFSFS

## Protein No.: I-904

**Protein name and Species:**

**Protein** disulfide isomerase **OS=Gossypium hirsutum**

**GN=GHPDI12 PE=2 SV=1**

**Accession: tr|G1ED19|G1ED19\_GOSHI**

**Unused ProtScore: 2.53**

**Seq Cov %: 7.2**

**ITRAQ Changed Ratio:**

**117: 115=E3TL: D3TL=2.36**

**116: 114=E5TL: D5TL=1.50**

**Annotated typical Precursor MS Region:**

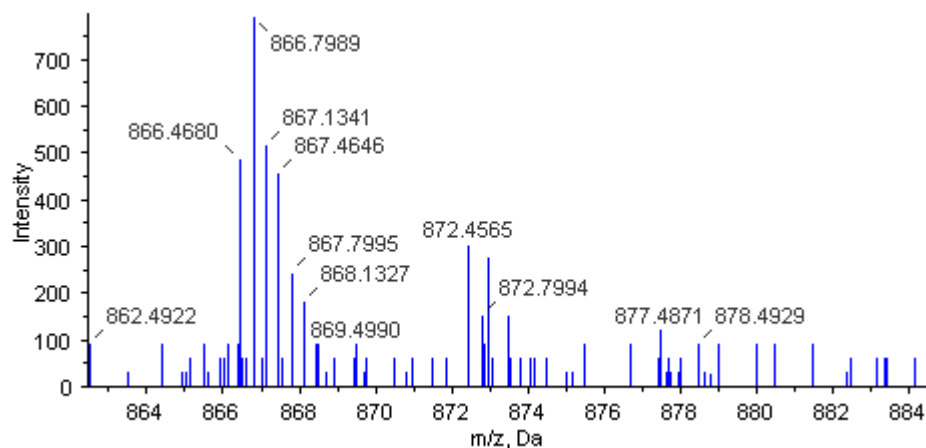

## Sequence Coverage and Matched peptides: in different color

MKSQICLAFGTLALLLASAL**ADDVVVLTEANFDK**EVGQDRGVLIIEFYAPWCGHCKKLAPYEYKLGATFK  
KAKSVLIGKVDCDEHKSLCSKYGVQGYPTVQWFPKGSLEPKKYEGTSTAEAPVEFVNTEGGTNVKIATL  
PSNVAVLNADNFDEIVLDETKDVLVEFYAPWCGHCKNLAP**TYEK**VATAFK**SEEDVVIANLDADK**YRDLA  
EKYGIS**GFPTLK**FFPKGNKAGEDYDGGR**DLDDFVSFINEK**CGTSRDAKGQLTSTAGILSSLDALVKEFV  
AASADEKKVVF**SKIEEEVEK**LKGST**ARHGK**IYLKAAKSCLEKGADYPKKEIERLQRMMLDKSISPAKADE  
**FTLKKNILSTFASS**

# Protein No.: I-905

**Protein name and Species:**

**Glutathione S-transferase,2,4-D inducible OS=Glycine max**

**GN=GSTa PE=1 SV=1**

**Accession: tr|O49235|O49235\_SOYBN**

**Unused ProtScore: 2.52**

**Seq Cov %: 9.1**

**ITRAQ Changed Ratio:**

**117: 115=E3TL: D3TL=0.35**

**116: 114=E5TL: D5TL=0.16**

**Annotated typical Precursor MS Region:**

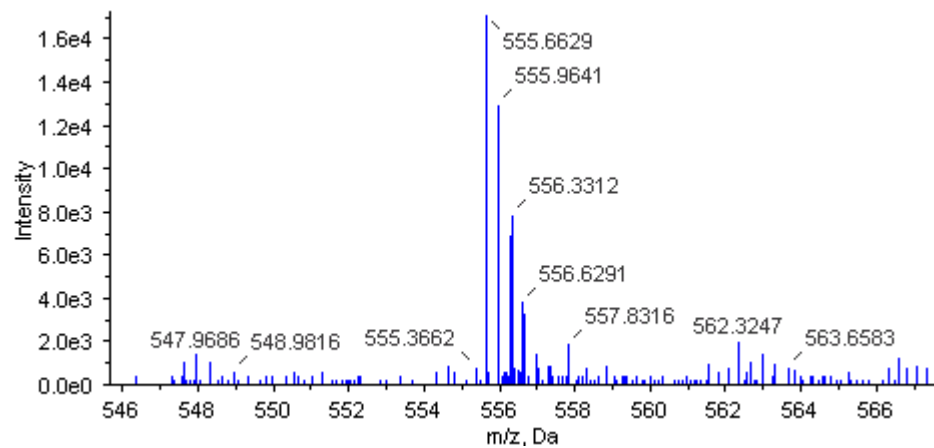

**Sequence Coverage and Matched peptides: in different color**

MSDEVVLLDFWSPFGRVVR**I**ALA**E**KGIK**Y**EYKEEDLRNK**S**PLLL**Q**MNPVHK**K**IPVLIHNGK**P**ICESLI  
AVQYIEEVWNRNPLLPSPDPYQRAQTRFWADYVDKK**I**YDLGR**K**IWTSKGEEK**E**AAK**K**EFIEALK**L**LEEQ  
LGDKTYFGGDNLGFVDIALVPFYTFWKAYETFGTLNIESECPKFI**A**WAKRCLQKES**V**AKSLPDQQKVYE  
F**I**MDLR**K**KL**G**IE

# Protein No.: I-907

Protein name and Species:

Cysteine synthase OS=Medicago truncatula PE=2 SV=1

Accession: [tr|B7FKU7|B7FKU7\\_MEDTR](#)

Unused ProtScore: 2.5

Seq Cov %: 19.1

ITRAQ Changed Ratio:

117: 115=E3TL: D3TL=0.59

116: 114=E5TL: D5TL=1.07

Annotated typical Precursor MS Region:

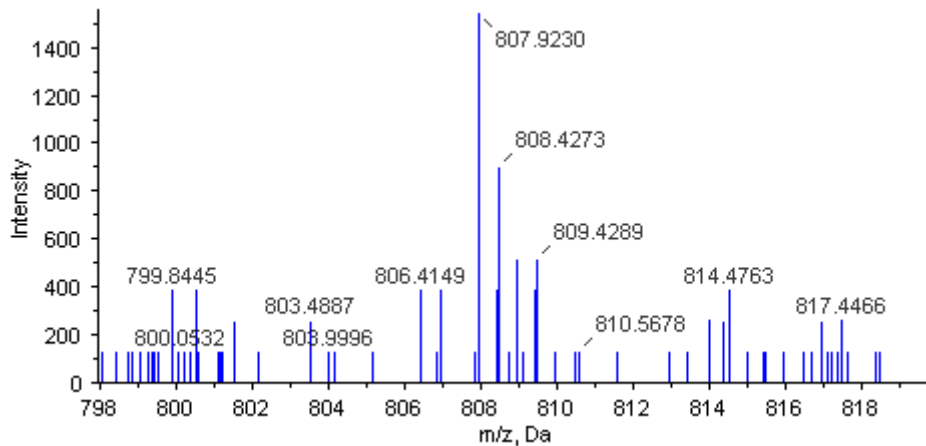

Sequence Coverage and Matched peptides: in different color

MAVERSGIAKDVTE~~LI~~IGKTPLVLYLNRLADGCVARVAAKLELMPCSSVKDRIGYSMIADAE~~E~~EKGLITPG  
QSVLIEPTSGNTGIGLAFMAAAKGYKLIITMPASMSLERRIILLAFGAELVLTDPAGMKGAVQKAEEL  
LAKTPNAYILQQFENPANPKVHYETTGP~~E~~IWKGTGKIDAFVSGIGTGGTITGAGKYLKEQNSNIKLI  
GVEPVESVLSGGKPGPHKIQQIGAGFVPGVLEVNLIDEVVQISSDEAIE~~TAKLLL~~LALKEGLFVGISSGAA  
AAAAIKIAKRPENAGKLI~~VVV~~FP~~S~~FGERYLSSVLFESVRR~~E~~AETMTFEP

## Protein No.: I-914

### Protein name and Species:

trehalose-phosphate synthase [UDP-forming] 9 [Arabidopsis thaliana] OS=Arabidopsis lyrata subsp. lyrata GN=ARALYDRAFT\_889930 PE=4 SV=1

Accession: [tr|D7KNJ9|D7KNJ9\\_ARALL](#)

Unused ProtScore: 2.48

Seq Cov %: 3.5

### ITRAQ Changed Ratio:

117: 115=E3TL: D3TL=1.89

116: 114=E5TL: D5TL=1.96

### Annotated typical Precursor MS Region:

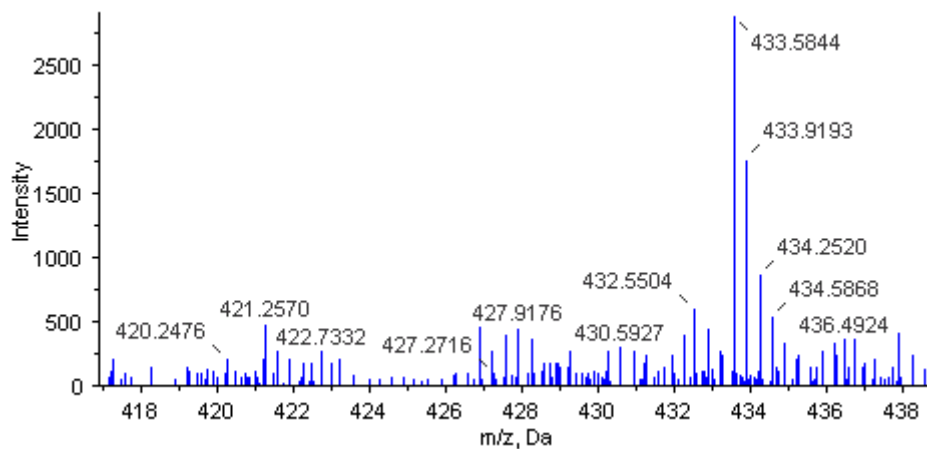



## Sequence Coverage and Matched peptides: in different color

MVSRSCANFIDLASWDLDFPQTQRALPRVMTVPGIISELDGGYSDGSSDVNSSSSSRERKIIIVANMLP  
LQAKRDTESGQWCFSWDEDSLLLQLRDGFSSDTEFVYIGSLNADIGTSEQEEVSHKLLLDNFNCVPTFLP  
KEMQEKFYLGFCCKHHLWPLFHYMLPMFDPDHGDRFDRRLWQAYVSANKIFS DRVMEVINPEEDYVWIHDY  
HLMVLP TFLRKRFRNIKLGFFLHSPFPSSSEIYRTL PVRDDLRLGLLNCDLIGFHTFDYARHFLSCCSR  
LGLDYESKR**GHIGLDYFGR**TVFIKILPVGIHMGRLSVLNLPSTAAKMKIEIQEQFKGKKLILGVDDMDI  
FKGISLKL**IAMER**LFETYWHMRGKLVLIQIVNPARATGKDVEEAKRETYSTVKRINERYGSAGYQPVIL  
IDRLVPRYEKTAYYAMADCCLVNAV RDGMNLVPHYKIIICRQGT PGMDKAMGISHDSPT**SMLVSEFIG**  
**CSPSLSGAIR**VNPWDVDAVSEAVNLALTMGETEKRLRHEKHYHYVSTHDVGYWAKSFMQDLERACREHY  
NKRCWGIGFGLSFRVLSLSPSFRKLSIDHIVSTYRTTQRR AIFLDYDGTLPVPESSIIKTPNAEVLSVLK  
**SLCGDPK**NTV FVVVSGRGWESLSDWLSPCENLGIAAEHG**YFIR**WSSKREWETCYSSAEAEWKTMVEPVMR  
SYMDATDGSTIEFKESALVWHHQEADPDFGACQAKELLDHLESVLANEPVVVVRGQHIVEVKPQGVSKG  
LAVEKVIHRMVEDGNPPDMVMCIGDDRSDEDMFESILSTVTNPDLPMPPEIFACTVGRKPSKAKYFLDD  
VSDVLKLLGGLAAAASSSRKPEDQQQSSSLHTQVAFESII

## Protein No.: I-921

**Protein name and Species:**

**Adaptin ear-binding coat-associated protein, putative**

**OS=Ricinus communis GN=RCOM\_0553580 PE=4 SV=1**

**Accession: tr|B9SGK0|B9SGK0\_RICCO**

**Unused ProtScore: 2.45**

**Seq Cov %: 6.2**

**ITRAQ Changed Ratio:**

**117: 115=E3TL: D3TL=0.27**

**116: 114=E5TL: D5TL=0.99**

**Annotated typical Precursor MS Region:**

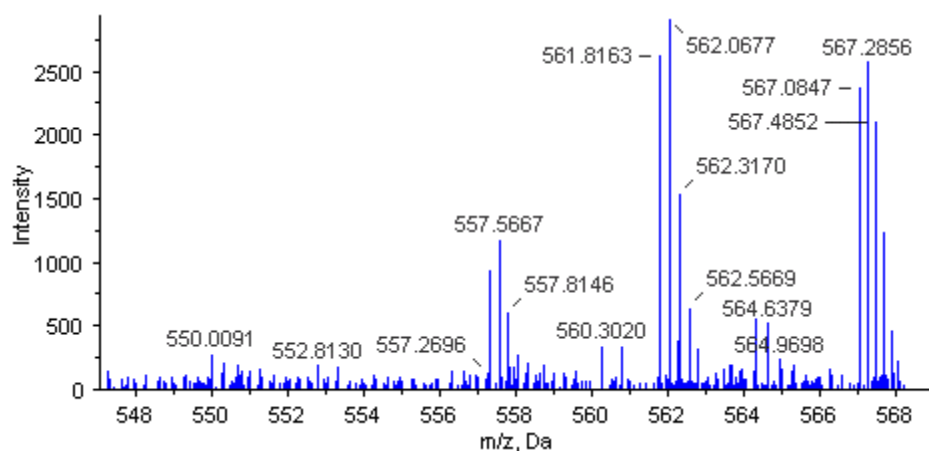

## Sequence Coverage and Matched peptides: in different color

MLRKHLGPHVHSPISQPPPVSDDSIILPQPEAVLDRR**VIQK**GKYRPKSDVLIKWKGAPREDATWENEWR  
FTKSYLDYLNPFHAYDEGNLSWMAAAEAEPATMSMVRRAIPNASSLEEGNRVLRGNWLKTIEQHHQQYS  
GKSIISDILDVGC SVGVSTRFLADKFPLAKVTGLDLSPHFLSVAQFKEKKGAPRKNP INWIHANGEDTG  
LPSKSYDLVTIAFVVHECPER**AINGLLR**EAYRLLRPGGTIALTDSSPKSKILQIMEIEVKDLNDQEKET  
EETEAIELVLFHVSECYVY**LIPPR**KAASCRADENNVNKWAWEGMLKVISKGEECI IKLEDKTTGELYA  
RAFLR**DGEPHPVEPVIDSSR**YFVLR**IEENIGGR**LRHAFIGIGFRETEAYDFQAALHDHMKYLNKKK**TA**  
**EEMEQHFQK**TSTVDYSLKEGETLVLQIKNKSGSGMKS KILDQGLNLSLEEKGEQKELI**LGIK**LPPPPP  
APVSPVTS PRFPSDLPPKISLDGTSIDNSPRLRKEEAKEQHSPDNESTQDIPDDDFGDFQAAG

## Protein No.: I-929

### Protein name and Species:

Putative uncharacterized protein OS=Ricinus communis

GN=RCOM\_0186330 PE=4 SV=1

Accession: [tr|B9T8C2|B9T8C2\\_RICCO](#)

Unused ProtScore: 2.41

Seq Cov %: 6.6

### ITRAQ Changed Ratio:

117: 115=E3TL: D3TL=0.61

116: 114=E5TL: D5TL=0.29

### Annotated typical Precursor MS Region:

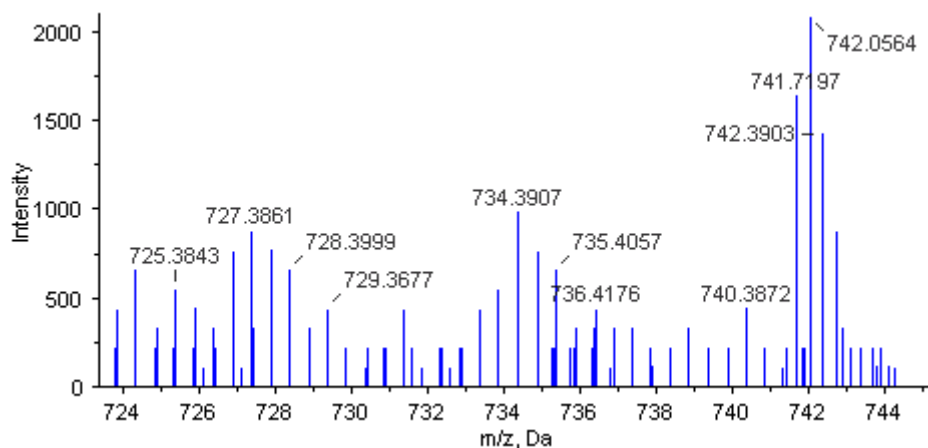

## Sequence Coverage and Matched peptides: in different color

MSMLDSFFNKGFKATKCKTLLKLTIPR**IKLLR**NRREIQIKQMR**DIAK**LLETGQEATARIRVEHI IREE  
NMMAAQEILELFCELISVRLPIIEAQ**RECP**LDL**KEAISSICFAAPR**CADLQELLQVQML**FVSKY**GREFV  
AAATELMPECGVNRQLIELLSVR**APSPDV**KLKLLKEIAEEHELDWDPAASETELLKKHEDLLNGPTQFV  
SGSKLPLPEEKHEEALNSVPDQAHNEQPDSDFETLDFPEVPKVALRPSANTASAPEMLPIPPAAQ**RG**  
IEHEPSNLSANYENLAQECHLENEDLTEEEPVATKDG**TANI**VD**AKEEK**QFLPFISPPVSSTSFSTRPST  
SPPISRTK**SEFNVDLQDVIAAAQAAAE**TAER**AAAAAR**LAATLAQARISVLT**KKNSEK**FPECSDENPFHV  
DTPDQSP**TT**EKPHFGHQHSFDG**PSGVSSYL**HLHQHEDHQ**SELHDLPSF**EKLKMEYDSPPSDLVHEQQ  
SVRHQPQRLPSMDDDAYFSYPNLFTSQNP**NLGSSAQSGTGNSHSAHDV**

# Protein No.: I-938

**Protein name and Species:**

**Glutathione-s-transferase theta (Fragment) OS=Jatropha curcas**

**PE=2 SV=1**

**Accession: tr|D6BRD9|D6BRD9\_9ROSI**

**Unused ProtScore: 2.37**

**Seq Cov %: 15.9**

**ITRAQ Changed Ratio:**

**117: 115=E3TL: D3TL=2.27**

**116: 114=E5TL: D5TL=2.11**

**Annotated typical Precursor MS Region:**

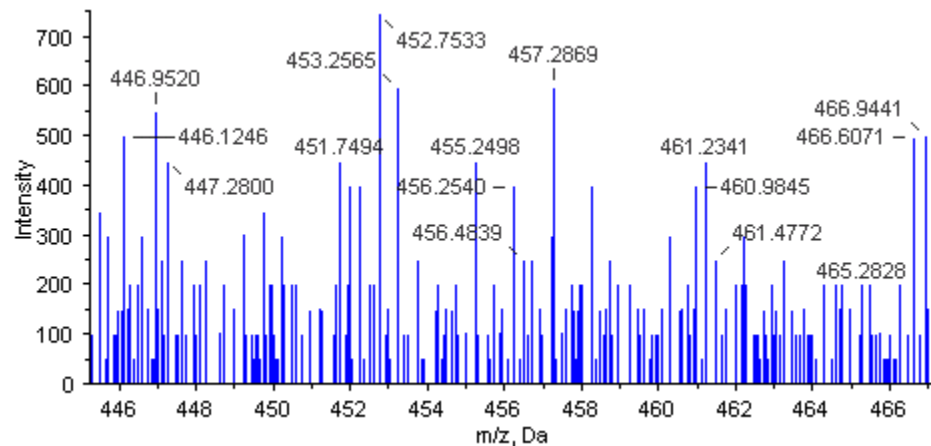

## Sequence Coverage and Matched peptides: in different color

MAVIK**VHGNPI**STAT**QR**VLATLYEKDLEFEFVHIDLATGEHKR**EPFISLNPFGQVPALEHGDLK**LFESR  
**AITQYITHENPDK**GTQLL**CPGK**VKMPILTVWMEVEAQKFEPAAASKLNWEVFLKPIFGLTTDSAAVEANE  
AELSKVLDVYEARLAQSKYLACDCFTLVDLHHLPNLQLLLLTQSKKLIESRPHVSAWAADITARPAWAK  
VLAMQRV

## Protein No.: I-944

**Protein name and Species:**

**Fructose-bisphosphate aldolase OS=Arabidopsis lyrata subsp.**

**lyrata GN=ARALYDRAFT\_482625 PE=3 SV=1**

**Accession: tr|D7LJ40|D7LJ40\_ARALL**

**Unused ProtScore: 2.35**

**Seq Cov %: 28.2**

**ITRAQ Changed Ratio:**

**117: 115=E3TL: D3TL=0.52**

**116: 114=E5TL: D5TL=0.22**

**Annotated typical Precursor MS Region:**

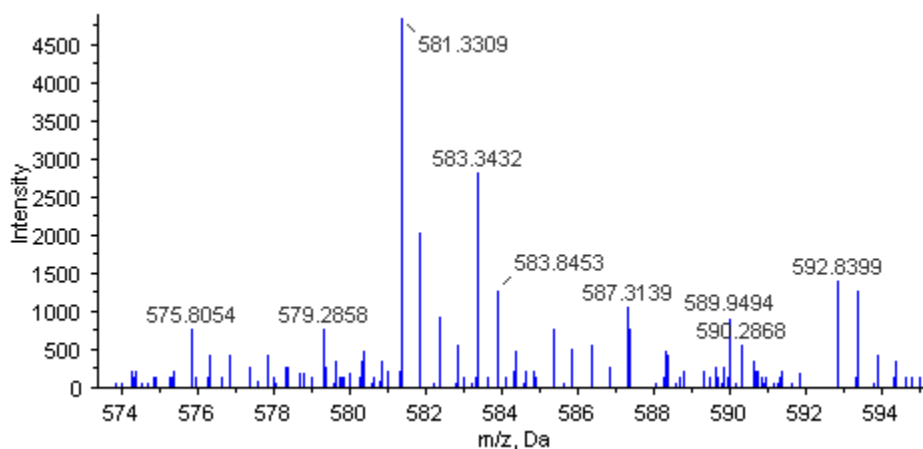



## Sequence Coverage and Matched peptides: in different color

MSCFTTK**FADELIANAAYIGTPGK**GILAA**DESTGTIGKRLASINVENVESNRR**ALRELLFTTPGALPCL  
SGVILFEETLYQKSSNGTFFVDMLK**SAGVLP**GIK**V**DK**GTVELAGTNAE****TTTQGLDGLGDR**CKK**YYEAGA**  
**R**FAKWRAVLKIGQNEPSELAIHENAYGLARYAVICQENGLVPIVEPEILVDGSHDIHKCAAVTER**VLAA**  
**CYKALSDHHVLL**EGTLLKPNMVT**PGSESAKVAPEVIAEHTVR**ALQR**TVPAAVPAIVFLSGGQSEEEATR**  
**NLNAMN**KLK**TKKPWSLSFSFGRALQQSTLK**TWGGKEENVK**KAQEAF**LVRCK**ANSEATLGTYKGDAKLGE**  
**GAAESLHV**KDYKY

## Protein No.: I-945

**Protein name and Species:**

coatomer subunit delta OS=Populus trichocarpa

GN=POPTRDRAFT\_824854 PE=4 SV=1

Accession: [tr|B9ICR4|B9ICR4\\_POPTR](#)

Unused ProtScore: 2.35

Seq Cov %: 5.9

**ITRAQ Changed Ratio:**

117: 115=E3TL: D3TL=0.20

116: 114=E5TL: D5TL=0.47

**Annotated typical Precursor MS Region:**

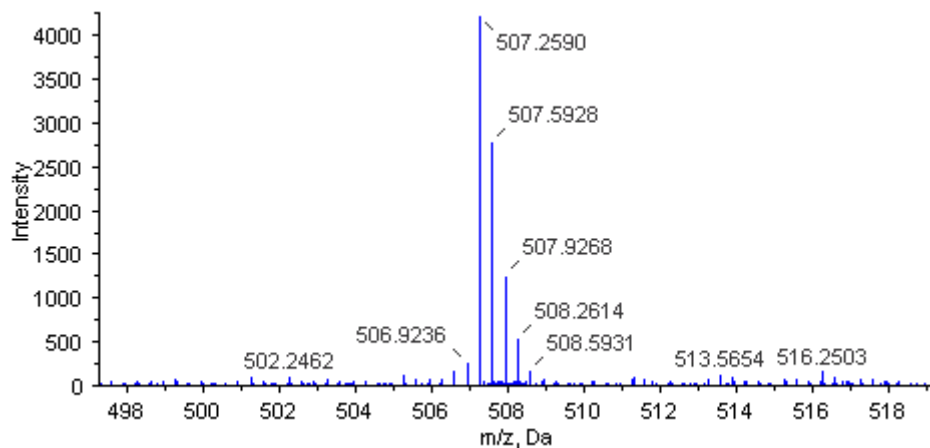

## Sequence Coverage and Matched peptides: in different color

MVVLAAASIVSKNGKVLVSRQFVDMRIRIEGLLAAFPKLIGSGKQHTYVETENVRVYVYQPIEAMYL LLLV  
TNKQSNILEDLDTLRLLSKLVPEYTM SLDEEGICQTAFELIFAFDEVISLGHKENVTVAQVKQYCEMES  
HEEKLHKLVLQNKIDETKRRMKEEASKIDQMKIEKNRGNKGGFMSSMGSGRIESSFNDMSISSGGGGGF  
GSGSGFGLTSDVDSFSSKPKGRQPSSATAPPKGLGMKLGKTQR TNQFLESLEKAEGEMIVEDVQPSKSTQ  
YTSAAQKLTDPVTLTAEKLNVT LKRDGGMSHFVQGHLSLQILNQEDGLIQVQIETGGNPGVIFKTHP  
NVNKELFANENILGLRDP SRPFPACQTGDAGVLLKWRMQSVDESMVPLTINCWPSESGNETYVSI EYE  
ASSMFDLRNVVIAVPLPALREAPNVRQIDGEWRYDARNSILEWSILLIDNSNRSGSMEFVVP SGDSSAF  
FPITVQFSATSTYSELKVANILPLKGGAPPKFSQRTQLITENYQVV

## Protein No.: I-948

**Protein name and Species:**

**Adenylyl cyclase-associated protein OS=Populus trichocarpa**

**GN=POPTRDRAFT\_556459 PE=3 SV=1**

**Accession: tr|B9H0Q2|B9H0Q2\_POPTR**

**Unused ProtScore: 2.34**

**Seq Cov %: 8.2**

**ITRAQ Changed Ratio:**

**117: 115=E3TL: D3TL=0.40**

**116: 114=E5TL: D5TL=0.54**

**Annotated typical Precursor MS Region:**

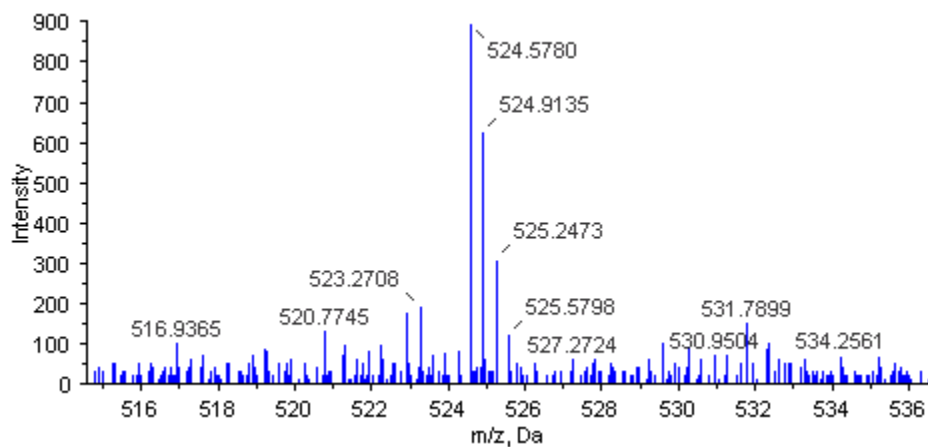

## Sequence Coverage and Matched peptides: in different color

MEERLMARLES~~AVAR~~LEALSLRGGSVAGSGDDASATDPSIVAFEDFMGAYLGRVSSAGEKIGGQVLAV  
TKILEQALNMQKELLIKIKQTQKPDLAGLAEFLKPLNEVIMK~~ANSMTEGRRSDFFNHLK~~AAADSSTALA  
WIAYTGKDCGMSMPIAHVEESWQMAEFYNNK~~LLVEYK~~SKDPNHVEWAKALK~~ELYLPGLR~~DYVKSHYPLG  
PVWSATAKAKAAAPSAPAPPPPPASLFTSESSSPSSSKPKVGMMAAVFQEISSGKPVTSGLRKVTDNMK  
TKNRADRTGVVGASEKESR~~TSSPSFSK~~AGPPK~~LELQMR~~KWVVENQIGRK~~NLVIDDCDAKQSVYIFGCK~~  
DSVLQVQGK~~VNNITIDK~~CTKMGVVF~~TDVVAACEIVNCSGVEVQCQGSAPTISVDNTGGCQLYLSK~~~~GSLG~~  
~~ASITTAK~~SSEINILVPGAEPDGD~~LVEHALPQQFIHTFK~~~~DGQFETTPVSHSGG~~

## Protein No.: I-949

**Protein name and Species:**

**Annexin-like protein RJ4 OS=Frugaria ananassa PE=2 SV=2**

**Accession: sp|P51074|ANX4\_FRAAN**

**Unused ProtScore: 2.34**

**Seq Cov %: 6.7**

**ITRAQ Changed Ratio:**

**117: 115=E3TL: D3TL=0.09**

**116: 114=E5TL: D5TL=0.37**

**Annotated typical Precursor MS Region:**

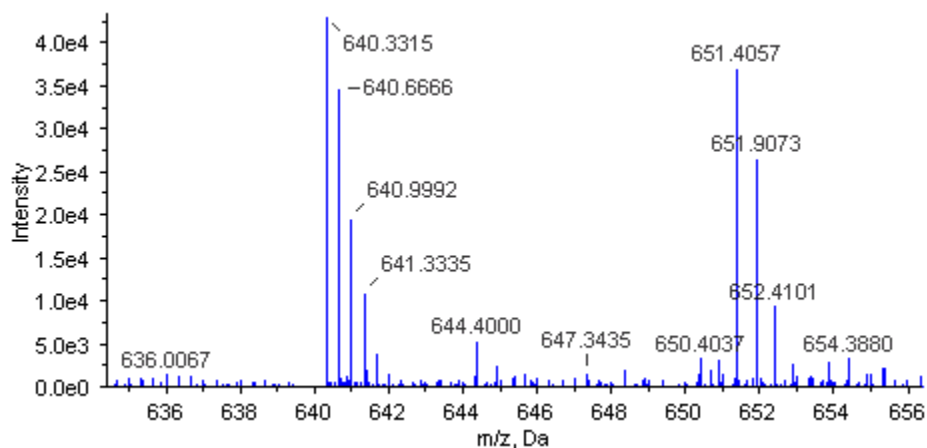

## Sequence Coverage and Matched peptides: in different color

MATLVSPPN**FC**AKEDAEALRKS VKGWGTNEKAIIS **ILGHR**NAGQRKEIRAAYEQLYQEDLLKPLESELS  
GDFEKAVYRWTLDPADR**DAVLANVAIK**KSTDVYNVIEIEISCIHSPEELLAVRRAYQLRYKHSVEEDLAA  
HTTGDIR**KLLVALVTAYR**YDGHEINAKLAN**SEADILHDAIK**DKAFNH**EEIIR**ILSTRSKTQLMATFNKY  
RDDQGISISKNLLEEGANDFQKALHTAIR**CLNDPK**KYFEKVLRNAIKR**VGTDEDALTRVIVTRAERDLR**  
**DIKEVYYKKNSVPLEQAVAK**DTSGDYKAFLLTLLGKED

## Protein No.: I-952

**Protein name and Species:**

**Fructose-bisphosphate aldolase OS=Codonopsis lanceolata PE=2**

**SV=1**

**Accession: tr|Q2WFK8|Q2WFK8\_9ASTR**

**Unused ProtScore: 2.33**

**Seq Cov %: 23.5**

**ITRAQ Changed Ratio:**

**117: 115=E3TL: D3TL=0.47**

**116: 114=E5TL: D5TL=0.33**

**Annotated typical Precursor MS Region:**

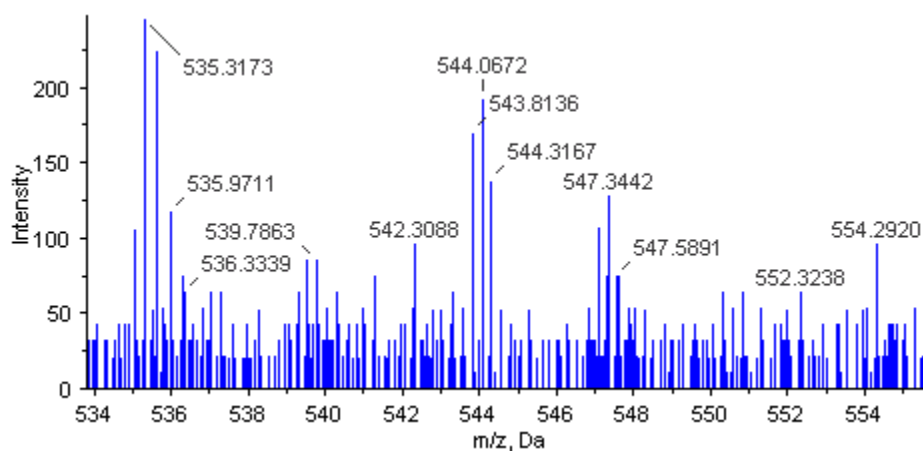



## Sequence Coverage and Matched peptides: in different color

MSCYKGYADELIANATYIGTPGKGI~~LA~~ESTGTIGKR~~LSS~~INVENIESNRWALRELLFCTPGALQYL  
SGVILFEETLYQKTAAGKPFVDVLK~~ENG~~VLP~~GI~~K~~V~~DKGTVVLAGTNGETTTQGLDGLGARCAQYYAAGA  
RFAKWRAVLNIGPNEPSQLAINENANGLAR~~Y~~AIICQENGLVPIVEPEILVDGAH~~DI~~AKCADVTER~~V~~LAA  
CYKALNDHHVLL~~EG~~TLLKPNMVT~~P~~GSDSAKVAPEVVAEY~~T~~IRALQRTMPAAVPAVVFLSGGQSEEQATV  
NLN~~A~~INKYKGGKPWSLT~~F~~SFGRAL~~Q~~QSTLK~~A~~WAGK~~E~~ENVAKAQAAFLARCKANSEATLGT~~Y~~EGGASLSE  
GAAESLHV~~K~~DYKY

# Protein No.: I-975

Protein name and Species:

dolichol-phosphate mannosyltransferase OS=Populus

trichocarpa GN=POPTRDRAFT\_801608 PE=4 SV=1

Accession: tr|B9H5H4|B9H5H4\_POPTR

Unused ProtScore: 2.28

Seq Cov %: 14.7

ITRAQ Changed Ratio:

117: 115=E3TL: D3TL=1.77

116: 114=E5TL: D5TL=2.07

Annotated typical Precursor MS Region:

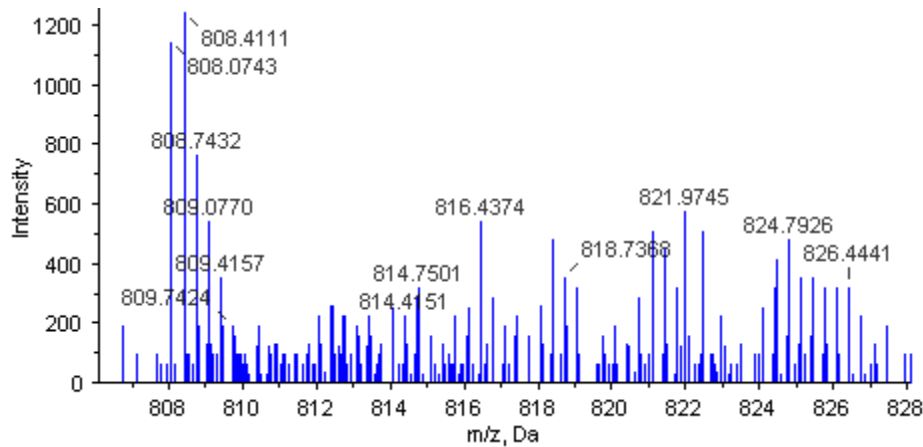

Sequence Coverage and Matched peptides: in different color

MEKNNRYSIIIVPTYNERLNIALIVYLIIFKHLQDVEFEIIVVDDGSPDGTQEVVKQLQKVYGEDRILLRP  
RAKKLGLGTAYIHGLKHASGNFVIMDADLSHHPKYLP~~SPFIK~~KQLETGASIVT~~GTR~~YVKG~~GGV~~HGW~~NLM~~  
RKLTSR~~GANVLAQ~~TL~~LWPGV~~SD~~LTGSFR~~LYKK~~SVLE~~DI~~ISSV~~VSKGYV~~FQ~~MEMIVRASR~~KGYQ~~IEEVPI  
TFVDRV~~FGSSKLGGSEI~~VEYLKGLAYLLVTT

# Protein No.: I-981

**Protein name and Species:**

**Predicted protein OS=Populus trichocarpa**

**GN=POPTRDRAFT\_818483 PE=4 SV=1**

**Accession: tr|B9H739|B9H739\_POPTR**

**Unused ProtScore: 2.26**

**Seq Cov %: 9.5**

**ITRAQ Changed Ratio:**

**117: 115=E3TL: D3TL=0.61**

**116: 114=E5TL: D5TL=1.05**

**Annotated typical Precursor MS Region:**

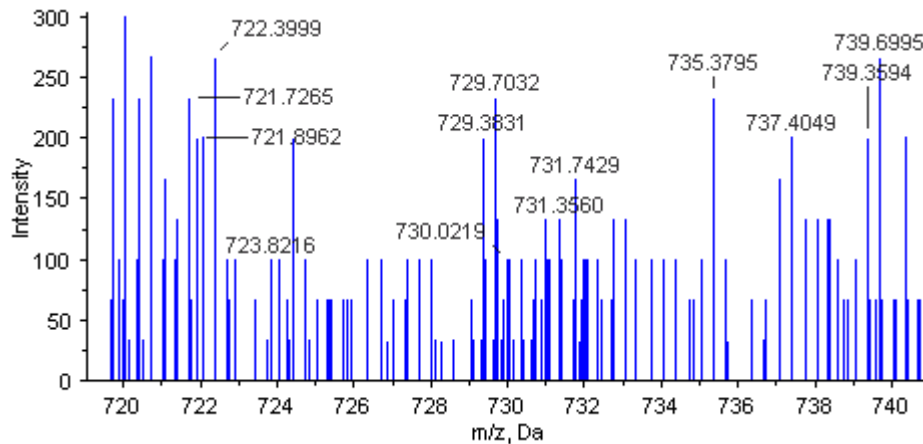

## Sequence Coverage and Matched peptides: in different color

MERSTPVRKPHTSTADLLTWSETPPPDSPSVGSAPRPTRSHQPSDGI SK **VVFGGQVTEEEFESLNK**RKP  
CSGYMKEMTGSGIFAANGEDDTAESGSANPIPNSKTGLRMYQQAIAGISHISFAEDDSVSPKKPTTL P  
EVAKQRELSGTLESESDAKLKKQISGAKSK **ELSGHDIFAPPPEILPR**PTTVRALALQESIQLGEPSPHD  
PVGQQPSEESVVKTAKKINNQK **FNELSGNDIFK**GDAPPSSAEKPLSVAKLREMSGNDI **FADGK**VESRD  
FLGGV**RKPPGGESSIALV**

## Protein No.: I-982

**Protein name and Species:**

**Phospholipase D OS=Frangaria ananassa PE=2 SV=1**

**Accession: tr|Q533V0|Q533V0\_FRAAN**

**Unused ProtScore: 2.25**

**Seq Cov %: 11.6**

**ITRAQ Changed Ratio:**

**117: 115=E3TL: D3TL=0.29**

**116: 114=E5TL: D5TL=0.24**

**Annotated typical Precursor MS Region:**

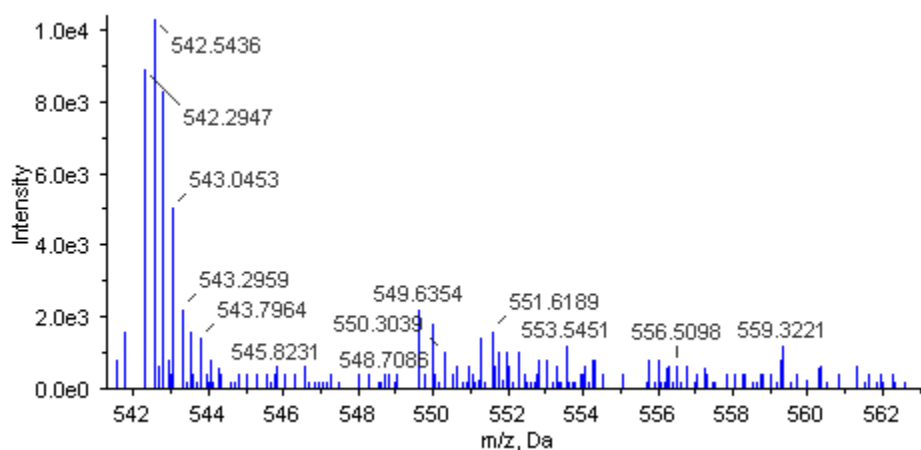

## Sequence Coverage and Matched peptides: in different color

MGDSAEHWLHGTLHATIYEVDKLGSSGNFLRKITGKLEETVGLGKGVSKLYATVDLERARVGRTRVIE  
KEPSNPWNWSESFHIYCAHVAANVIFTVKESNPIGASLIGRAYVPVEQLIEGEEVDTWAKILDDKKNPVH  
GEPKIHVKLQFFHVSKDRSWGQGIKSPKFPVPFTFFSQRQGC**VS**LFQDAHV**PK**F**IP**K**I**PLAGGKYY  
EPHR**CW**ED**I**FDAIT**NA**KHLIYITGWSVY**TE****I**SL**IR**DSR**RP**K**SG**GD**I**TIGEL**LK**KKASEGVR**VL**M**L**V**W**DD  
**RT**SV**GL**L**LK**KDGLMATHDEETAQ**F**Q**NT**D**VN**CVLCPRNP**D**GGGSIVQGAQISTMFTHHQKIVVVDSEMPN  
GGSQSR**RI**VS**FV**GG**LD**LC**D**GRY**D**TP**FH**SL**FR**TL**D**TA**H**H**D**DFH**Q**PN**F**T**G**AS**I**T**K**GGPREPWHD**I**HSR**LE**G  
PIAWDVL**F**N**F**EQ**R**WRK**Q**GGK**D**VL**V**QL**R**ELDN**V**I**I**PPSP**V**MF**P**DD**H**ET**W**N**V**QL**F**R**S**ID**G**GA**A**F**G**FP**D**SP**E**  
**DA**AR**A**GL**V**SG**K**D**NI****I**DR**S**I**Q**DAY**I**H**A**IRAKNFYIENQYFLGSSFAWA**AD**G**I**K**P**EDIGASHV**I**PR**EL**S  
**L**K**I**ADK**I**ANGER**F**TVYVV**V**PM**W**PEG**I**PESAS**V**QA**I**LD**W**Q**R**RT**M**EM**M**Y**K**DI**K**Q**A**LD**K**H**G**VEED**P**R**NY**L**T**F  
**F**CL**G**N**R**EV**K**K**D**GEY**E**P**S**E**A**PE**A**DS**DY****I**RA**Q**E**A**RR**F**MI**V**H**T**K**MM**I**V**D**D**E**Y**I**I**GS**A**N**I**N**Q**R**S**MD**G**A**R**D**S**  
E**I**AM**G**AY**Q**PH**H**LS**V**REP**A**R**G**Q**I**H**G**FR**M**AL**W**YE**P**L**G**ML**D**ET**F**L**Q**PES**V**E**C**I**K****K**V**N**Q**I**AD**K**Y**W**D**L**YS**S**ET**L**  
E**H**DL**P**GH**L**L**R**YP**V**GV**T**SE**G**EV**T**EL**P**GF**E**FF**P**DT**K**AR**V**L**G**A**K**SD**Y**L**P**P**I**L**T**T

## Protein No.: I-990

**Protein name and Species:**

**Malic enzyme OS=Populus trichocarpa**

**GN=POPTRDRAFT\_737670 PE=3 SV=1**

**Accession: tr|B9ILT5|B9ILT5\_POPTR**

**Unused ProtScore: 2.23**

**Seq Cov %: 7.3**

**ITRAQ Changed Ratio:**

**117: 115=E3TL: D3TL=0.59**

**116: 114=E5TL: D5TL=1.25**

**Annotated typical Precursor MS Region:**

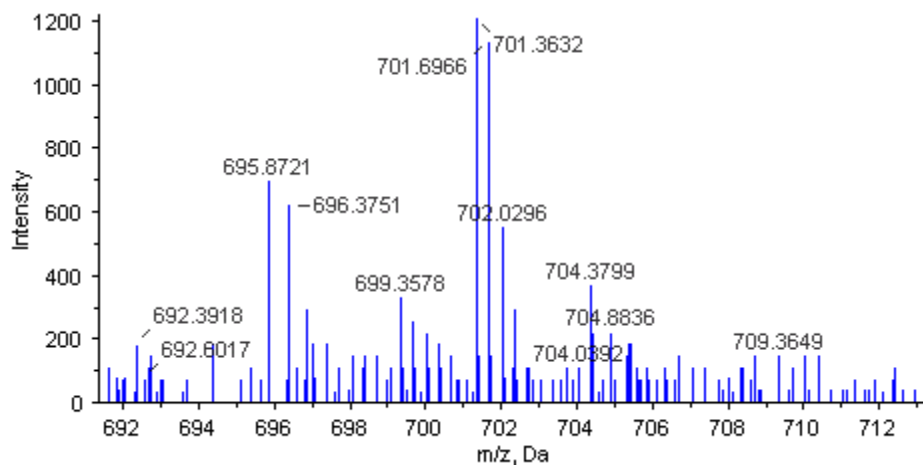

## Sequence Coverage and Matched peptides: in different color

MESTLKEMRDGASVLDMDPKSTVGGGVEDVYGEDRATEDQLVTPWTISVASGFLLLRDPQHNKGLAFTE  
KERDAHYLRGLLPPATISQQLQEKKLMNTIRQYQLPLQKYTAMMELEERNERLFYKLLIDNVEELLPVV  
YTPTVGEACQKYGSIFKRPPQGLYISLKEKGGKVLVDVLKNWPQKSIQVIVVTDGERILGLGDLGCQGMGIP  
VGKLSLYTALGGVRPSACL PVTIDVGTNNEQLLKDEFYIGLRQKRATGQEYSELLHEFMTAVKQNYGEK  
VLIQFEDFANHNAFDLLAKYGTTHLVFNDDIQGTAAVVLAGLISALKLLGGSLADHTFLFLGAGEAGTG  
IAELIALEMSRRSKTPLEETRKKIWLTDKGLIVSSRKESLQHFKKPWAHEHEPVKGLLEVVKAIKPTV  
LIGTSGVGKTFTEVIEAMASFNEKPLILALSNTSQTAEAEAYTWTGKAIFASGSPFDPVEYEGK  
VFVPGQSNAYIFPGLGLGLVISGAIRVHDDMLLAAAEALAGQIKEEYLAKGLIYPPLSNIRKISVQIA  
ANVAAKAYELGLATRLPRPENLVKHAESCMYSPAYRYR



## Protein No.: I-993

**Protein name and Species:**

**Signal recognition particle 68 kDa protein, putative OS=Ricinus communis GN=RCOM\_1503780 PE=4 SV=1**

**Accession: tr|B9RA70|B9RA70\_RICCO**

**Unused ProtScore: 2.23**

**Seq Cov %: 6.9**

**ITRAQ Changed Ratio:**

**117: 115=E3TL: D3TL=2.91**

**116: 114=E5TL: D5TL=0.86**

**Annotated typical Precursor MS Region:**

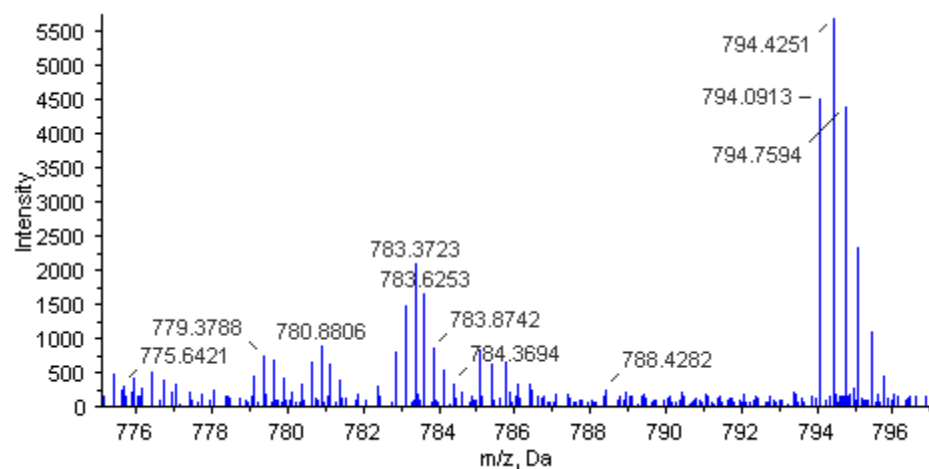

## Sequence Coverage and Matched peptides: in different color

MAMDIDGPKSNNSEQISPRYSINVLQLLKSAQMQHGLRHGDYTRYRRYCTARLRRLYKSLKFTHGRGKY  
TRRAITESTVTEVRFLHLVLYSAERAWSHAMEKRQLPDGPNARQRIYLIIGRLRKAVQWANLFSQLCAAK  
GDSRTSLEAEAYAAYMNGNLLFEQDRNWDTALKNFISARAVYEELGKYGDLENQVLCRERVEELEPSIR  
YCRHKIGQSNLQTSDDLQIGEMEGPALDLFKTKLEAVMAEARSQQAASLTFHHLGKFPISNAKTRVA  
ILKAQELEKDLHGSAADSLPAEKKLVVFDKIFAAYHEARSCIRSDLVSAGNADSVKDDLSGLDKAVSAV  
LGQRTIERNQLLVSIASKFIKRRDDKNEKLTRPEELVRLYDLLLQNTSDLSDLVSSGRDTKPEEVAFS  
EDCALRSLAFRAQRCFYLAKSYSLAGKRTEAYSILYCRARSLSENALQKFQSLNNTDEIMVKELKTLYNE  
CRSNSCIEHASGIMEDEKAPENLSKKVSAISLGGDKKVEKFLLEKLDVYESAVGDPHVKAPPRIEVFP  
PAFQTIPRNPIILDLAYNYIDFPSEENRMKKDKKGFISRLWR

# Protein No.: I-1002

**Protein name and Species:**

**Hydrolase; Leukotriene A-4 hydrolase, putative OS=Ricinus communis GN=RCOM\_1071200 PE=4 SV=1**

**Accession: tr|B9SD61|B9SD61\_RICCO**

**Unused ProtScore: 2.2**

**Seq Cov %: 5.2**

**ITRAQ Changed Ratio:**

**117: 115=E3TL: D3TL=6.19**

**116: 114=E5TL: D5TL=3.09**

**Annotated typical Precursor MS Region:**

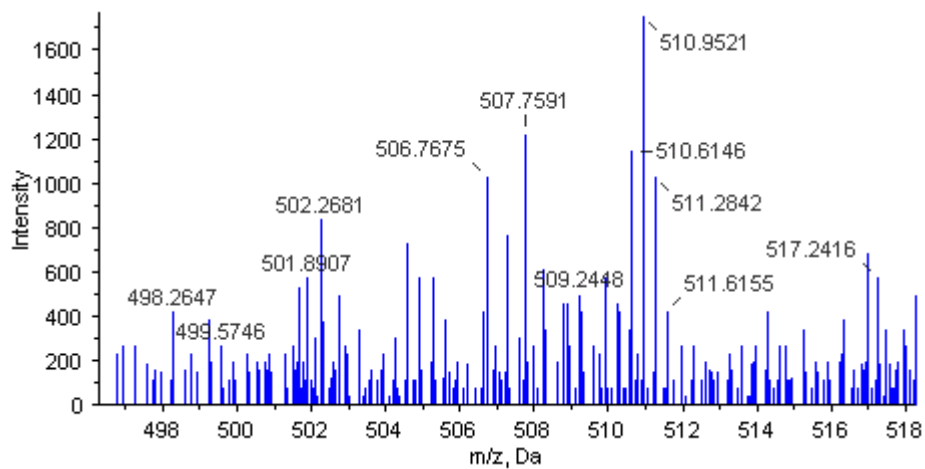

## Sequence Coverage and Matched peptides: in different color

MAPVDPHSYTDSTHPLTTHISLSLYFDFASASTIHGTALFSLSTPHTGHISLDTRSLTVHKIADPVTRAL  
IPFSLSP EIDPIKGCHLTLSLQSQSSFLILYSTSPSSSALQWLSPPQTFGKAQPFVYTQCQSIHARSVF  
PCQDTPAARICYSARLNIPRQLAAVMSARHCHRRAPVSGDVENSIDEGTDFDLKSIWCGEGRVIEEFVM  
EQPIPPYLFAFA**AVGELGFR**EVGPRTRIYSENVGDVLDAAAREFSGTEEMIRQGEKLFGEYEWERFDLLV  
LPPSFPYGGMENPRMVFLTPTVIKGDSSGAQVVAHELASHWTGNLITNTNNHFWLNEGFTTYAERR**IV**  
**EVVQGEDK**AVLNIGIGWRGLNEEVERFKDNMEFTKLK**TNQENADPDDMYSQVPYEK**GFQFLWRIERQIG  
RPAFDEFLKKYIATFKFKSIDTDMFLDFLK**ANVPGIEK**DIDLQLWTEGTGIPDAYEPVSNVYTKIISL  
AHEFKLGTMPGEVEVADWQGQEWELY**LENLPKSVESQIALDAR**YRL**SESK**DYEVKVAFLELAILSGC  
KDYFSAVEKTLKEVGRMKYLRPLYTALVQGTGKEEE**KILAK**RVFAEARDCYHP IAQGVEA**IFAKHL**

# Protein No.: I-1008

**Protein name and Species:**

**Alanine aminotransferase [Medicago truncatula] OS=Medicago truncatula PE=2 SV=1**

**Accession: [tr|B7FM77|B7FM77\\_MEDTR](#)**

**Unused ProtScore: 2.19**

**Seq Cov %: 5.9**

**ITRAQ Changed Ratio:**

**117: 115=E3TL: D3TL=5.06**

**116: 114=E5TL: D5TL=1.54**

**Annotated typical Precursor MS Region:**

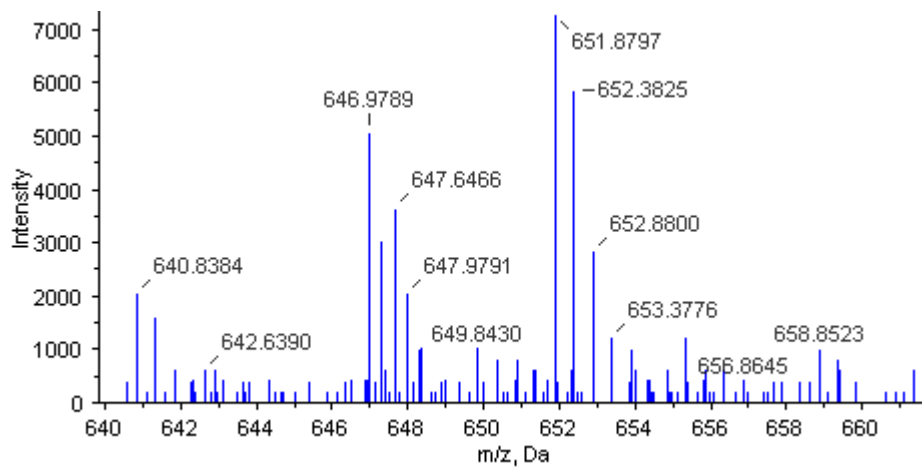

## Sequence Coverage and Matched peptides: in different color

MRKSAADRFRHLFNRSLVFRNQNQQYHHPSPLRSLSSMASDSPFPVTAQNINPQVLKCQYAVRGEIVT  
LAQNLQKALQANPDAHSFDEIIYCNIGNPQSLGQQPITFFR**EVLALCDYPALLDK**SETQGLFSADSIER  
AWQLVDQIPGRATGAYSHSQGIQGLRDTIAAGIEERDGFPCNANDIFLTDGASPAVHMMQLLIRSEKD  
GILCPIPQYPLYSASITLHGGLVPPYYLDEATGWGLEISELKKQLEEAKSKGISVRALAAINPGNPTGQ  
VLAEDNQR**AIVEFCKQEGLVLLADEVYQENVYVPEK**KFHSFKKVS**SMGYGDNDICLVSFQSVSK**GYHG  
**ECGKRGGYMEVTGFSPDVR**EQIYKVASANLCSNITGQIL**ASLIMSPPK**VGDESYESFMAERGAILSSLT  
TRAKALEEALNKLEGVTCNK**AEGAMYLFP**IRLPEKAIKAAEAEKSAPDAFYCKRLLNATGIVVPGSG  
FGQVPGTWHFRCTILPQEDRIPAIVTRLTEFHQKFMDEFDRD

# Protein No.: I-1016

Protein name and Species:

Ras-related protein Rab11B OS=Nicotiana tabacum

GN=RAB11B PE=2 SV=1

Accession: sp|Q40521|RB11B\_TOBAC

Unused ProtScore: 2.18

Seq Cov %: 33.2

ITRAQ Changed Ratio:

117: 115=E3TL: D3TL=0.35

116: 114=E5TL: D5TL=1.21

Annotated typical Precursor MS Region:

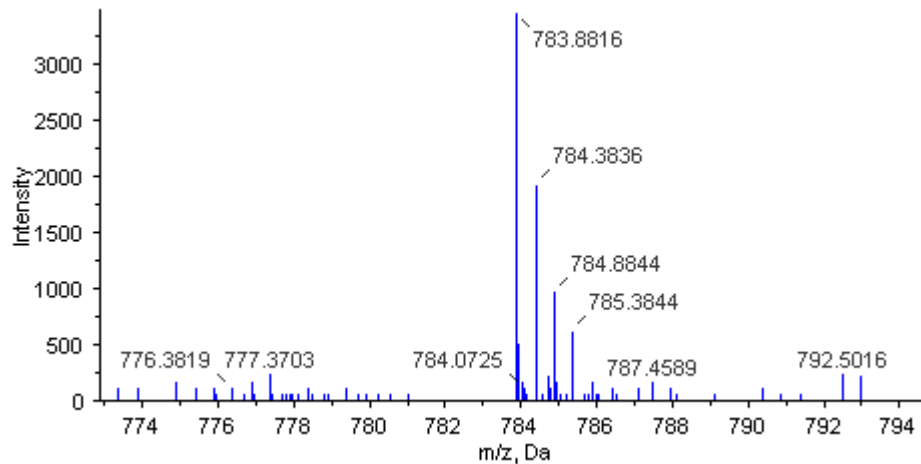

Sequence Coverage and Matched peptides: in different color

MAGGYRAEDDYDYLFLKLVLIIGDSGVGKSNLLSRFSRNEFNLESKSTIGVEFATR SIRVDDKIVKAQIWD  
TAGQERYRAITSAYYRGAVGALVVYDITRHVTFENVERWLKELRDHTDQNIIVIMLVGNKADLRHLRAVS  
TEDAKAFAERENTFFMETSALSLNVENAFTEVLTEIYKVVCRKALEVGDDPAALPKGQTINVGKDDVS  
AVKKVGCSS

# Protein No.: I-1019

## Protein name and Species:

guanine nucleotide-binding protein subunit beta OS=Vitis  
vinifera GN=VIT\_17s0000g02750 PE=4 SV=1

Accession: [tr|A5BV59|A5BV59\\_VITVI](#)

Unused ProtScore: 2.17

Seq Cov %: 12.2

## ITRAQ Changed Ratio:

117: 115=E3TL: D3TL=1.67

116: 114=E5TL: D5TL=0.30

## Annotated typical Precursor MS Region:

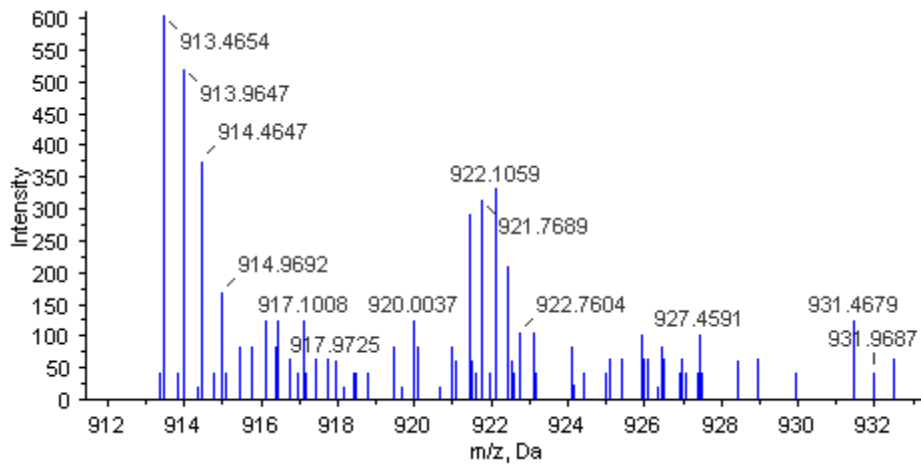



## Sequence Coverage and Matched peptides: in different color

MAETLVLRGTMRAHTDMVTAIATPIDN**SDMIVTSSRDK**SIILWHLTKDDK**TYGVPR**RRRLTGHSFVQDV  
VLSSDGQFALSGSWDGELRLWDLAAGTSARRFVGHTKDVLSVAFSVDNRQIVSASRDRTIKLWNTLGE  
KYTIQDADAHSWVSCVR**FSPNNLQPTIVSASWDR**TVKVWNLTNCKLR**ATLAGHGGYVNTVAVSPDGS**  
**CASGGKDGVILLWDLAEGK**RLYSLDAGAI IHALCFSPNRYWLCAATEQS IKIWDLESK**SIVEDLK**VDLK  
**TEAEK**SEDTTTTAKKKGKI IYCTSLSWSADGSTLFSGYTDGVVRVWGIGRY

# Protein No.: I-1026

**Protein name and Species:**

**Indole-3-acetic acid-amido synthetase GH3.5, putative**

**OS=Ricinus communis GN=RCOM\_0236810 PE=4 SV=1**

**Accession: tr|B9T6N8|B9T6N8\_RICCO**

**Unused ProtScore: 2.15**

**Seq Cov %: 3.4**

**ITRAQ Changed Ratio:**

**117: 115=E3TL: D3TL=2.38**

**116: 114=E5TL: D5TL=1.60**

**Annotated typical Precursor MS Region:**

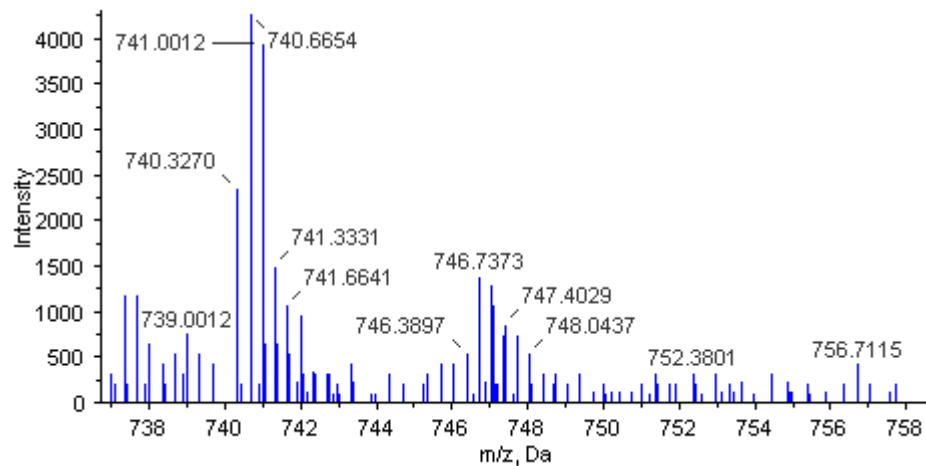

## Sequence Coverage and Matched peptides: in different color

MTKNAERVQKETLKK**ILEENGSAEYLQNLGLDGR**TDPESEFKICVPICTHGDLEPYIQRIADGDSSPVL  
GKPIITISLSSGTTQGPKYVPFTDQLLDNT**LQIFR**TSFAYRNREFPLENGK**ALEFVFSSKQGKTKGGL**  
**AAGTATTNLF**RNPNYKTALEELQFKSCSPREVI FGSDFHQSLSYCHLLCGLIFREDIQFVFSTFAHSIVL  
AFRTFEQVWEELCDDIRNGELSSRITAPSIRTAMSHLLKPNAELADL**IHTK**CSGLSNWYGLIPEL**FPNA**  
**KYIYGIMTGSMEPYLK**KLRYAGELPLLSADYGASEGWIAANVNPLLPPELATFAVLDPDIGYFEFIPLR  
RNGDHIYSEPKPIGLSDVKIGEEYEILVTNFAGFYRYR**LGDVVKVMGFHNSTPELK**FVCRRLSLLSINI  
DKNTEK**DLQLVVEEAAK**LLADEKLEVVDFFSSLADRSTDPGHYVIFWEISGEPTAEVLQECCNCLDR**SFL**  
**DAGYVTSR**KVKAIGPLELRVVH**RGTFQK**ILDHYLGLGAAVSQFKTPRCVGPANNVVSQILSNNVAKSYV  
STAF

# Protein No.: I-1029

**Protein name and Species:**

Vesicle transport protein-lik OS=Populus trichocarpa

GN=POPTRDRAFT\_584135 PE=4 SV=1

Accession: tr|B9N7F9|B9N7F9\_POPTR

Unused ProtScore: 2.15

Seq Cov %: 11.9

ITRAQ Changed Ratio:

117: 115=E3TL: D3TL=1.66

116: 114=E5TL: D5TL=1.74

**Annotated typical Precursor MS Region:**

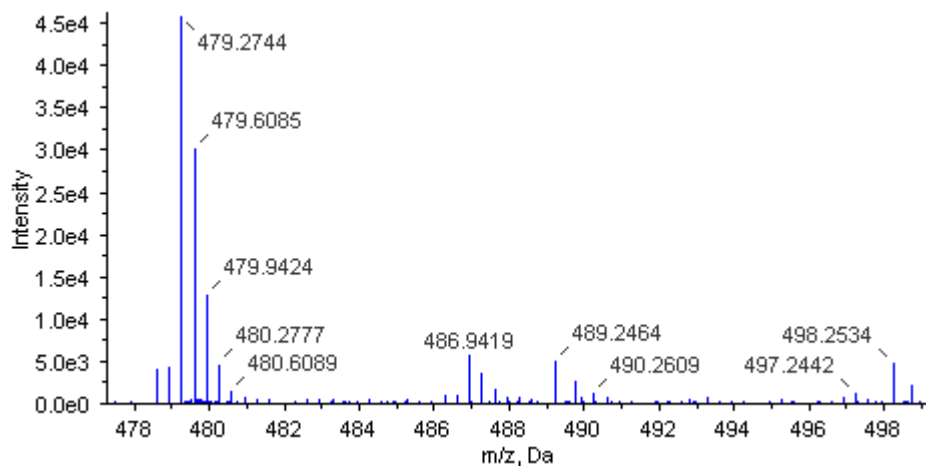

**Sequence Coverage and Matched peptides: in different color**

MVKL**TM**IAR**V**TD**GL**PLA**EGL**DDGRDVKDAEMYKQQVKALFKNLASGHNDASRMSVETGPYVFHYIIEGR  
VCYLTMCDRSYPK**KLAFQYLEDLK**YEFERVNGAQIETAARPY**AFIK**FDTFIQTKKLYQDTRTQRNVAK  
LNDELYEVHQIMTR**NVQEV**LV**GVGEK**LDQVVSQMSRLTSESR**IYAEK**ARDLNRQALIRKWAPVAIVLGVV  
FLLFWVKTKLW

# Protein No.: I-1030

**Protein name and Species:**

**Proteasome subunit alpha type OS=Populus trichocarpa  
GN=POPTRDRAFT\_818935 PE=2 SV=1**

**Accession: tr|A9PCM5|A9PCM5\_POPTR**

**Unused ProtScore: 2.14**

**Seq Cov %: 10**

**ITRAQ Changed Ratio:**

**117: 115=E3TL: D3TL=0.27**

**116: 114=E5TL: D5TL=0.38**

**Annotated typical Precursor MS Region:**

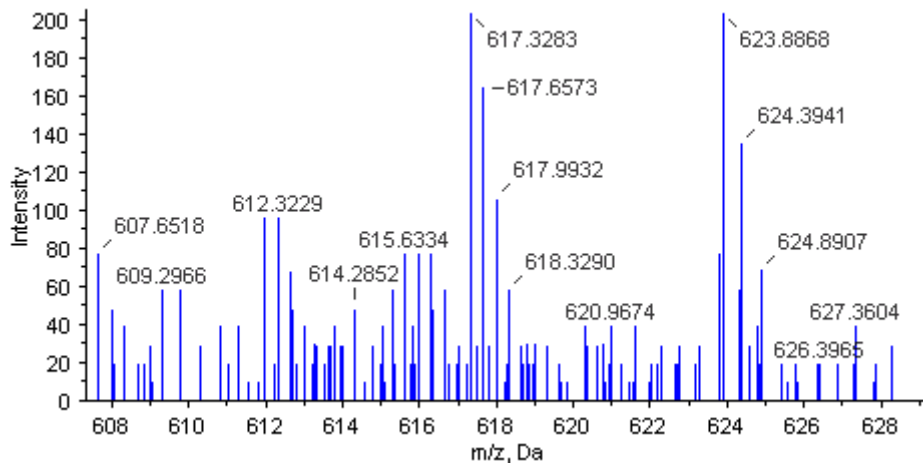

**Sequence Coverage and Matched peptides: in different color**

MSRRYDSRTTIFSPTEGR**LYQVEYAMEAIGNAGSAIGILSK**DGVVVLVGEKKVTSKLLQTSTSTEKMYK**ID**  
**DHVACAVAGIMSDANILINTARIQAQRYTFAYQEPMPVEQLVQSLCDTKQGYTQFGGLRPFVGSFLFAG**  
WDKNYGFQLYMSDPGNYSGWK**AGAIGANNQAAQSMKQDYKDEITREEAVQLALK**VLSKTMDSTSLTS  
EKLELAEVFLSPSGNVKYQVCSPDVLSKLLVKFGVTQPAETS

# Protein No.: I-1037

**Protein name and Species:**

**Aminoacyl-tRNA synthetase-like OS=Populus trichocarpa**

**GN=POPTRDRAFT\_552617 PE=3 SV=1**

**Accession: tr|B9GTA1|B9GTA1\_POPTR**

**Unused ProtScore: 2.13**

**Seq Cov %: 18.7**

**ITRAQ Changed Ratio:**

**117: 115=E3TL: D3TL=0.28**

**116: 114=E5TL: D5TL=0.22**

**Annotated typical Precursor MS Region:**

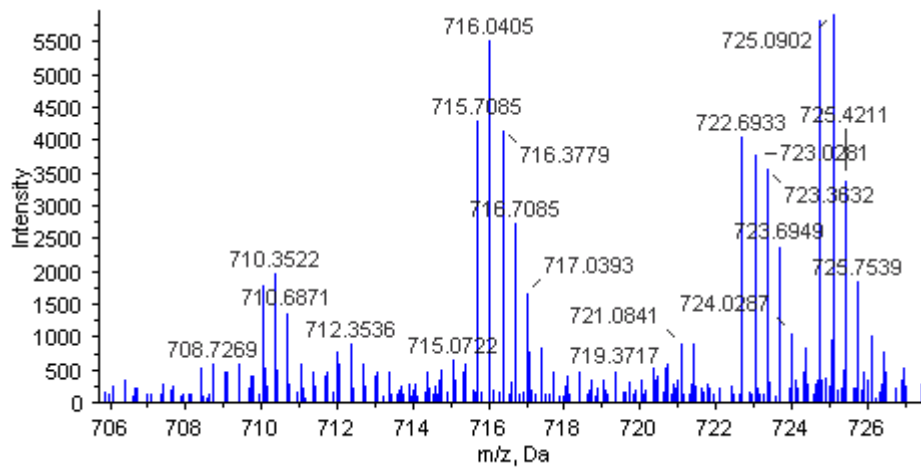

## Sequence Coverage and Matched peptides: in different color

MADGKKKEVK**KETGLGLTFK**KEENFGEWYSEVVVNGEMIEYYDISGCYILRPWSMSIWETMQAFFD**VEI**  
**K**KMKIK**NCYFPLFVSSSVLQK**EKDHIIEGFAPEVAWVTKAGKSDLEVPVAIR**PTSETVMYPYFSK**WIRGH  
RDLPLK**LNQWCNVVR**WEFSNPTPFIRSREFLWQEGHTAFASKQEADDEEVLQILELYRR**IYEEFLAIPVI**  
**K**GKKSEMEK**FAGGLYTTTSVEAFIPNTGRGIQGATSHCLGQNF**AKM**FEINFENEK**GEKGM**AWQNSW**AYST  
RTIGVMVMVHGDDKGLVLP**PKVASVQVIVVPV**PK**DADTQGI**FD**CAATVD**TL**CEAGIRAEADFR**ENYS  
PGWKYSHWEMK**GVPLRIEIGPKDLANNQVR**AVR**RD**NAAKVDISRD**SLMEKVKDMLDDI**Q**QLF**DAAK**QK**  
**RD**ACIQV**VKTWGEFK**EALSQRKMILAPWCDEEEVERDV**KER**TRGEMGAAKSLCSPFDQPELPEGTAC**FA**  
**SGK**PAKKWTYWGRSY

# Protein No.: I-1044

**Protein name and Species:**

**Chorismate synthase OS=Vitis vinifera GN=VIT\_13s0019g04190**

**PE=3 SV=1**

**Accession: tr|D7TMA3|D7TMA3\_VITVI**

**Unused ProtScore: 2.12**

**Seq Cov %: 6.9**

**ITRAQ Changed Ratio:**

**117: 115=E3TL: D3TL=0.60**

**116: 114=E5TL: D5TL=1.09**

**Annotated typical Precursor MS Region:**

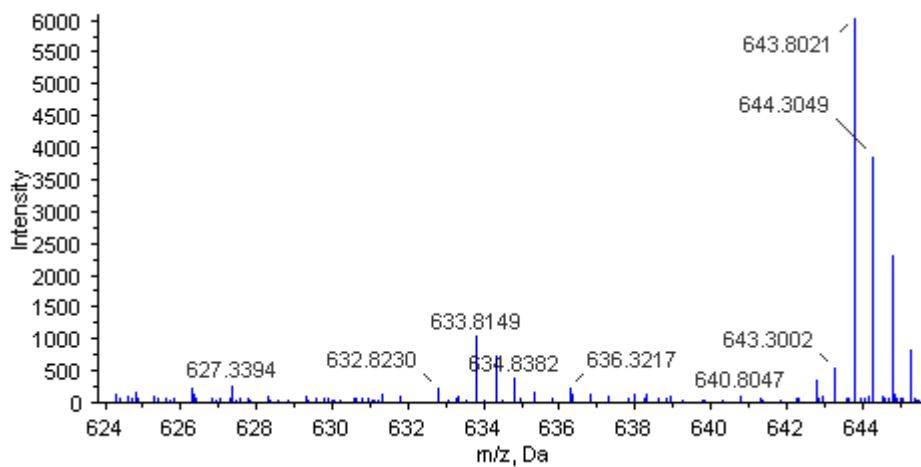



## Sequence Coverage and Matched peptides: in different color

MASSLSSKPFLTSPSTDGASGFGSLRKLSPFSVRYAIRPTHRRTLEIQAGSTYGTYFRVTTYGESHGG  
GVGCIIDGCPPRLPLTEADMQIDLDLRRRPGQSRITTPRKETDTCRIYSGVAEGMTTGSPIMVNPNTDQ  
RGNDYTEMSKAYRPSHADA**TYDFK**YGVRVSVQGGGRSSARETIGRV**AAGAVAK**KILKNFSGTEVLAYVSQ  
VHKVVLPEDLVDHETLALDQIESNIVRCPDPE**YAEKMIAAIDAVRVRGDSVGGVVT**CIVRNIIPRGLGSP  
**VFDKLEAELAKAALS**LPATKGFEEFGSGFAGTFMTGSEHNDEFF'TDAHGRIRTRTNRSGGIQGGISNGEI  
INIRIGFKPTSTIGKKQHTVTRDKQ**E**TE**L**IAR**GR**H**D**PC**V**VPR**AV**PMVEAAVALVLDQLMAQYAQCELF  
PINPALQEPELEFRDPELAGTHI

# Protein No.: I-1049

**Protein name and Species:**

**pantothenate kinase OS=Vitis vinifera GN=VIT\_08s0007g07660**

**PE=4 SV=1**

**Accession: tr|F6HLA1|F6HLA1\_VITVI**

**Unused ProtScore: 2.12**

**Seq Cov %: 3.8**

**ITRAQ Changed Ratio:**

**117: 115=E3TL: D3TL=0.47**

**116: 114=E5TL: D5TL=1.01**

**Annotated typical Precursor MS Region:**

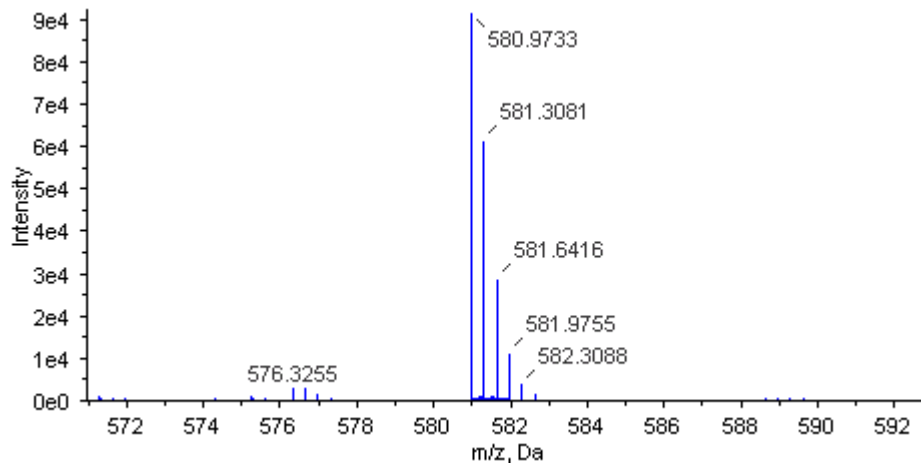

## Sequence Coverage and Matched peptides: in different color

MEFPPFGHHHHTHHHRPEYGAGEEEEEYLQPPPPPLIHPPPPPPAYFHGEDEPPPPAYFYGEDEPPPPRA  
QVHHISHADPPRPPSSSHVHHISHVEDQGFGRENYTHEGPPYARPPPVSYASAPVRHVSHHLNPQQPQ  
GTEQVETHHLHHLPGFLHHHNEAHGVGSNLSNKPTVRVFCCKAKPNHSLTILDGKVYLAPSNKTDMLQHW  
IKDEK**Y****S****T****S****V****K****D****E****E****G****F****P****S****F****A****L****V****N****K**ATGQAMKHSIGASHPVQLIPYNPDVLDSEVLWTESKDLGDNFRSI  
RMINNIHLNVDALHGDRSHGSVHDCTTIVLNKWKKGDNQLWKISLYFENPFPSQLTQSIPLSLNLSLCE  
C

# Protein No.: I-1051

**Protein name and Species:**

**Carotenoid cleavage dioxygenase 1 OS=Rosa damascena**

**GN=CCD1 PE=2 SV=1**

**Accession: tr|A9Z0V7|A9Z0V7\_ROSDA**

**Unused ProtScore: 2.11**

**Seq Cov %: 4.7**

**ITRAQ Changed Ratio:**

**117: 115=E3TL: D3TL=0.60**

**116: 114=E5TL: D5TL=0.93**

**Annotated typical Precursor MS Region:**

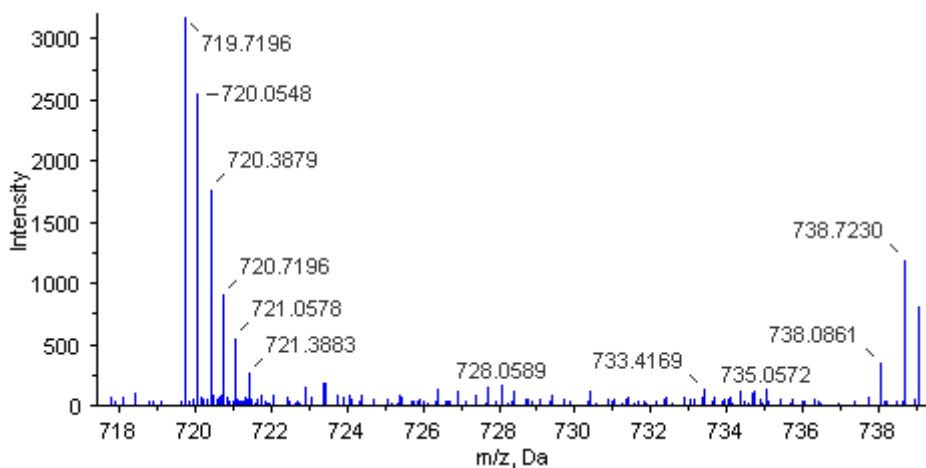

## Sequence Coverage and Matched peptides: in different color

MAEVVEKRHDDDVKEKLSNGI VVPNPKPSKGV TSTLVDTVEKLI VVKLMYDSSQPHHYLAGNFAPVIEE  
TPPTKDLHVIGHLPDCLNGEFVVRVGP NPKFAPVAGYHWF DGDGM IHGMRIKDGKATYVSRVVKTSRLKQ  
EEYFGGAKFMKVGD LKGLFGLLMVYMQQLRAK LKVLDSL YGHGTGNTAFVYHHGKLLALSEGDKPYVLK  
**VLEDGDLQTVGLLDYDKR**LKHSFT**AHPK**VDPFFT GEMFTFGYSHDPPYV TYRVISK DGFMDP IPIITVPA  
PVMHDFAITENY AIFMDLPLYFRPKEMVKEGKL IFSFDETKKARFGVLP R**YAKD DLLIR**WFELPNCFI  
FHNANAWEEEEDEVV LMTCRLENPD LDMVNGP IKKKLDNFKNELYEMR FNLTGLATQKKLSESAVDFPR  
**VNESY TGR**KQR**YVYGT TLDSIAK**VTGIVKFDLH**AAPEIGK**TKIEVGGNVQGLYDLGPGR**FGSEAI FVPR**  
VPGITSEEDDGYLIFFVHDENTGKS A IHVLD AKTMSGDPVA IVELPHRV PYPYGFHAFV TEEQLQE QAKF

# Protein No.: I-1059

**Protein name and Species:**

**Nucleoredoxin, putative OS=Ricinus communis**

**GN=RCOM\_1599380 PE=4 SV=1**

**Accession: tr|B9R8F0|B9R8F0\_RICCO**

**Unused ProtScore: 2.1**

**Seq Cov %: 11.6**

**ITRAQ Changed Ratio:**

**117: 115=E3TL: D3TL=0.56**

**116: 114=E5TL: D5TL=0.75**

**Annotated typical Precursor MS Region:**

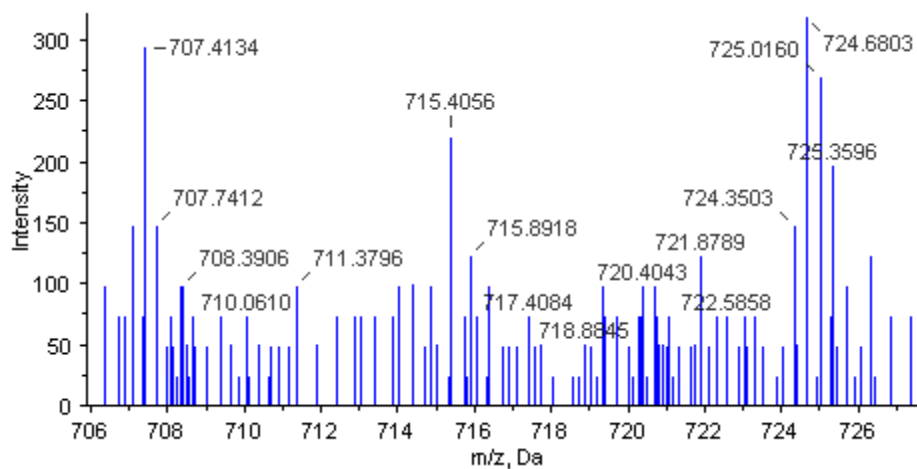

## Sequence Coverage and Matched peptides: in different color

MCHYLRLPLALHLRYK**VKVSELEGK**VIGLYFSANWYPPCRNFNQVLAVVYEQKENGSNFEVVFVSSDE  
NLDAFNRYRALMPWLSIPFSDLETKKALDRKFNIEGVPCLVILQPKDDKEEATLHDGVDLLYR**FGVQAF**  
**PFTKERLEELKMQEKEKHESQTLTNLLTNHDRDYLFAHPAPKQVPVASLIGKTIGLFFSAQWCRPGMK**F****  
**TPK**LISIIYHKIKQMLRERESDFEIVFVSTDRDQEGFDSYFNTMPWLALPFGDPTIKTLTK**YFDVQGIP**  
**CLIIIGPNGK**TITKNGR**NLINLYQENAYPFTEAK**VELLEKQMEEEFKSLPRSEYH**VGHK**HELNLVTEGT  
GGGPYICCDCDEQGSWAYQCLECGYEVHPKCVRVVEPGSTRAR

# Protein No.: I-1062

**Protein name and Species:**

**Structural molecule, putative OS=Ricinus communis**

**GN=RCOM\_1168960 PE=4 SV=1**

**Accession: tr|B9SS56|B9SS56\_RICCO**

**Unused ProtScore: 2.09**

**Seq Cov %: 11.2**

**ITRAQ Changed Ratio:**

**117: 115=E3TL: D3TL=0.65**

**116: 114=E5TL: D5TL=1.15**

**Annotated typical Precursor MS Region:**

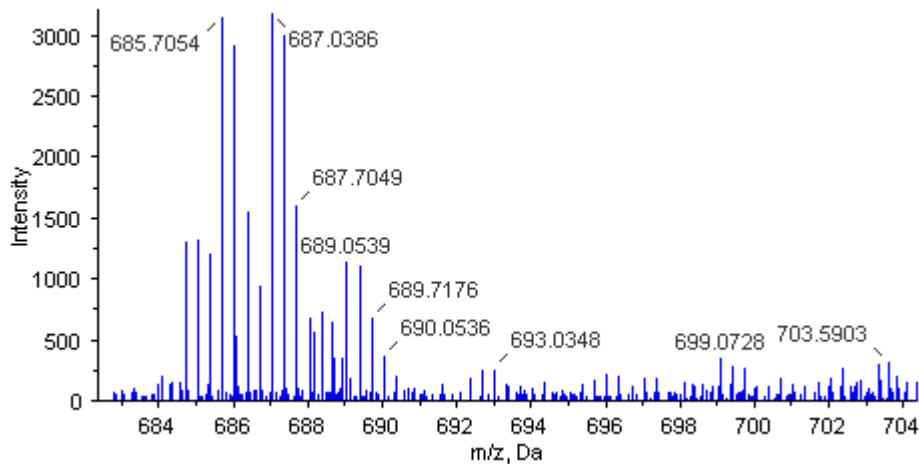

**Sequence Coverage and Matched peptides: in different color**

MDTLTSL LHPPSFSSSF INHSSSSSSSS **FTIK**AFPKRRLFY INNNTGKSL **LPVVK**SALDEVVPVLDPPPPPP  
PPPPPF GNERENKNLVLASLKLKLLSIVSGLNRGLAASEDDLQKAD **DAAAK****ELEAVGGLVDLSNDIDK**LQG  
**R**WKLIYSSAFSSRTLGGSRPGPPTGRLLPITLGQVFQRIDVLNKDFDNIVELQLGAPWPLPPVEVTATL  
AHKFEL **IGSAK**VKI **TFEK**TTVK **TG**NLSQL**PPL**EIPRIPDALRPPSNTGSGDFEVTYVDADTRITRGDR  
GELRVFVIA



# Protein No.: I-1065

**Protein name and Species:**

**Ribosomal protein L3A OS=Nicotiana tabacum GN=RPL3A**

**PE=2 SV=1**

**Accession: tr|Q6TKR0|Q6TKR0\_TOBAC**

**Unused ProtScore: 2.08**

**Seq Cov %: 8.7**

**ITRAQ Changed Ratio:**

**117: 115=E3TL: D3TL=1.66**

**116: 114=E5TL: D5TL=2.75**

**Annotated typical Precursor MS Region:**

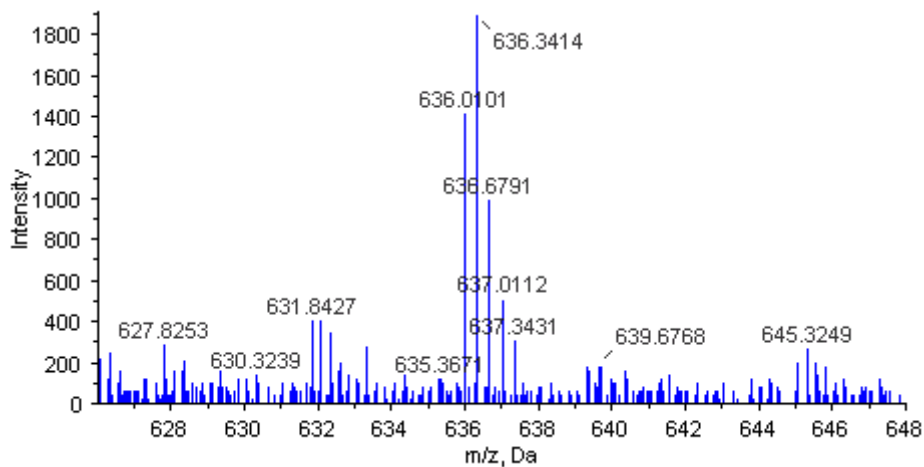

## Sequence Coverage and Matched peptides: in different color

MSHRKFEHPR**HGSLGFLPR**KRAARHRGKVKAFPKDDPNKPCK**LTAF LGYK**AGMTHIVRDVEKPGSKLHK  
KETCEAVTIIETPPMVIVGVVGYVKTPRGLRCLNTVWAQHLSEELKRRFYKNWCKSKKKAF LKYSKKYE  
SDEGKKDIQTQLEK LKKYACVIR**VLAHTQIR**KMKGLKQKKAHLMEIQVNGGTIAQK**VDFAYGFFEKQVP**  
**VDAVFQKDEMIDIIGVTK**GKGYEGVVTRWGVTRLPRKTHRGLRKVACIGAWH PARVSYTVARAGQNGYH  
HRTEMNKKVYKLGKAGQESHAAV**TDFDRTEK****DITPMGGFPHYGVVK**DDYLLIKGCCVGPKKR RVTLRQS  
LLNQTSR**VALEEIK**LKFIDTSSKFGHGRFQTTQEKQKQFYGRLKG

# Protein No.: I-1066

**Protein name and Species:**

**Glutamate decarboxylase isozyme 3 OS=Nicotiana tabacum**

**PE=2 SV=1**

**Accession: tr|Q94KK8|Q94KK8\_TOBAC**

**Unused ProtScore: 2.08**

**Seq Cov %: 8.1**

**ITRAQ Changed Ratio:**

**117: 115=E3TL: D3TL=2.21**

**116: 114=E5TL: D5TL=0.92**

**Annotated typical Precursor MS Region:**

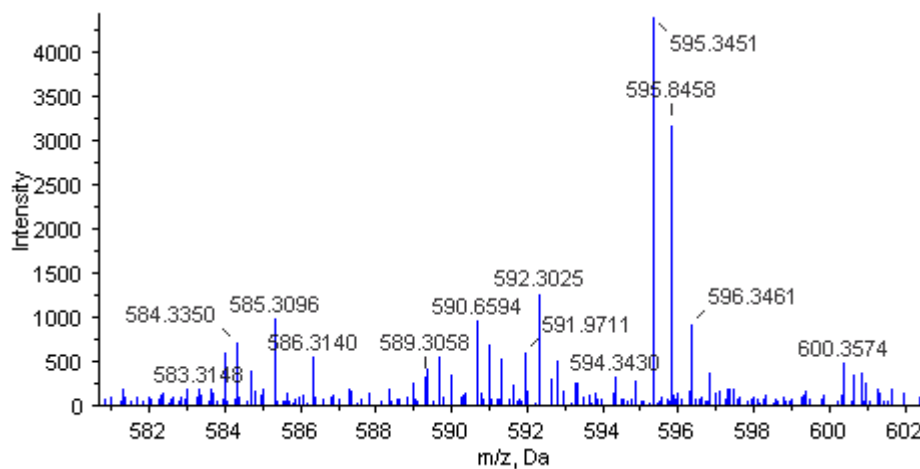

## Sequence Coverage and Matched peptides: in different color

MVLSKTSSES DVSVHSTFASRYVRTSLPRFEMAENSIPK**EAAFQIINDELMLDGNPR**LNLASFVTTWME  
PECDKLMMSINK**NYVDMDEYPVTTTELQNR**CVNMIARLFNAPLEEKETAVGVGTVGSSEAIMLAGLAFK  
RNWQNKRKAEGKPYNKPNIVTGANVQVCWEKFNANYFEVELKEVKLREGYYVMDPVQAVEMVDENTICVA  
AILGSTLNGEFEDVK**LLNDLLIEK**NKQGTGWNTPIHVDAASGGFIAPFLYPELEWDFRLPLVKSINVS GH  
KYGLVYAGIGWVIWRTKQDLPEELIFHINYLGADQPTFTLNFSK**GSSQVIAQYYQLIRLGYEGYR**NVME  
NCRENAIVLREGLEKTGR**FNIVSKDEGVPLVAFSLK**DNSRHNEFEVSETLRRFGWIVPAYTMPADAQHV  
TVLR**VVIREDFSRTLAERLVLDIVKVLHELDTLPARLSAKLEEVKLVK**NGKKFELEVQREVTNYWKKFV  
LARKAPVC

# Protein No.: I-1067

**Protein name and Species:**

**Aminopeptidase OS=Citrus unshiu GN=ORF12 PE=4 SV=1**

**Accession:** [tr|F8WL79|F8WL79\\_CITUN](#)

**Unused ProtScore:** 2.08

**Seq Cov %:** 4.6

**ITRAQ Changed Ratio:**

**117: 115=E3TL: D3TL=0.59**

**116: 114=E5TL: D5TL=0.41**

**Annotated typical Precursor MS Region:**

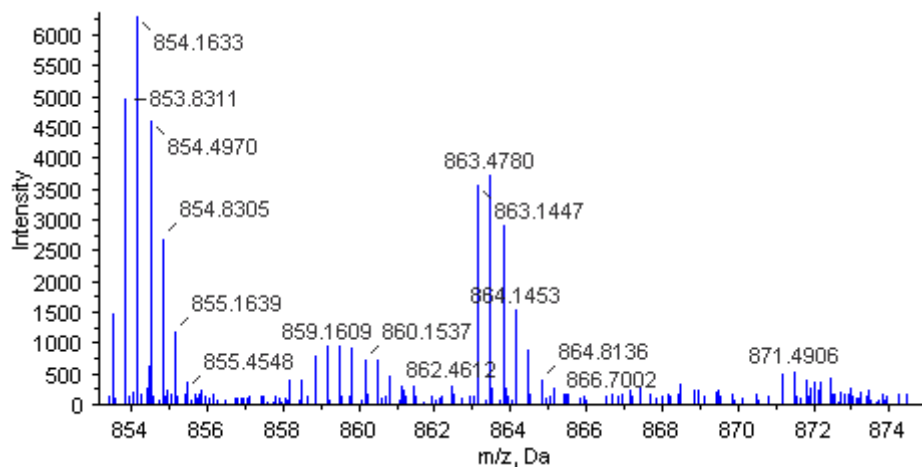

## Sequence Coverage and Matched peptides: in different color

MEEFKGQPRLPKFAVPKRYDIRLTPDLTSCKFGGSVAIDVDVVGDTKFIVLNAADLTINNRSVVSFTNKA  
SSKAL**EPTK**VELVEADEILVLEFAETLPTGMGVLAIGFEGVLNDKMKGFYRSSYELNGEKK**NMAVTQFE**  
**PADAR**RCFPWCWDEPACKATFK**ITLDVPSSELVALSNMPVIDEK**VDGNMKTVSYQESPIMSTYLVAVVIGL  
FDYVEDHTSDGTVTISIDSHGIKVRVYCVGKANQKGFALNVAVKTLELYKEYFAVPYSLPKLDMIAIP  
DFAAGAMENYGLVITYRETALLYDDQHSAAANKQRVATVVAHELAHQWFGNLVTMEWWTHLWLNNEGFATW  
VSYLAADSLFPEWK**IWTQFLDECTEGLR**LDGLAESHPIEVEVNHTGEIDEIFDAISYRKGASVIR**MLQN**  
**YLGAECFQR**SLASYIKKYACSNKTEDLWAALEEGSGEPVNKLMNSWTKQKGYPVISVKVREEKLELEQ  
ELLGCSISKEGDNGGWIK**LNVNQTGFYR**VKYDKDLAARLGYAIEKKQLSETDR**FGILDDHFALCMARQQ**  
TLTSLTLTLMASYSEETEYTVLSNLITISYKIG**RIAADARPELLDYLK**QFFISLQNSAEL**FICR**KLGD  
SKPGESH**LDALLR**GEIFTAL**LLGHK**ETL**NEASK**RFHA**FLADR**TTPLLPDIRKAAYVAVMQKVSASDR  
**SGYESLLR**VYR**ETDLSQEK**TRILSSLASCPDVNIVLEVLNFFLSSEVRSQDAVYGLAVSIEGRETAWKW  
LKASGVLKEVNFDPISSINGRISSITGTTSQRPGVLVFLSHALSAQLSHRFVVYTSQIMCSVFQLLH  
MCTSNVFPFLIPFLFLSAVWHAQFASYEKVREVEEFFSSRCKPY**IARTLRQSIERVQINAK**WVESIRNEG  
**HLAEAVK**ELAYRKY

# Protein No.: I-1071

## Protein name and Species:

serine/threonine-protein phosphatase 2A 65 kDa regulatory subunit A beta isoform [Vitis vinifera] OS=Vitis vinifera  
GN=VIT\_17s0000g03870 PE=4 SV=1

Accession: [tr|D7SIX7|D7SIX7\\_VITVI](#)

Unused ProtScore: 2.07

Seq Cov %: 14.8

## ITRAQ Changed Ratio:

117: 115=E3TL: D3TL=0.16

116: 114=E5TL: D5TL=0.28

## Annotated typical Precursor MS Region:

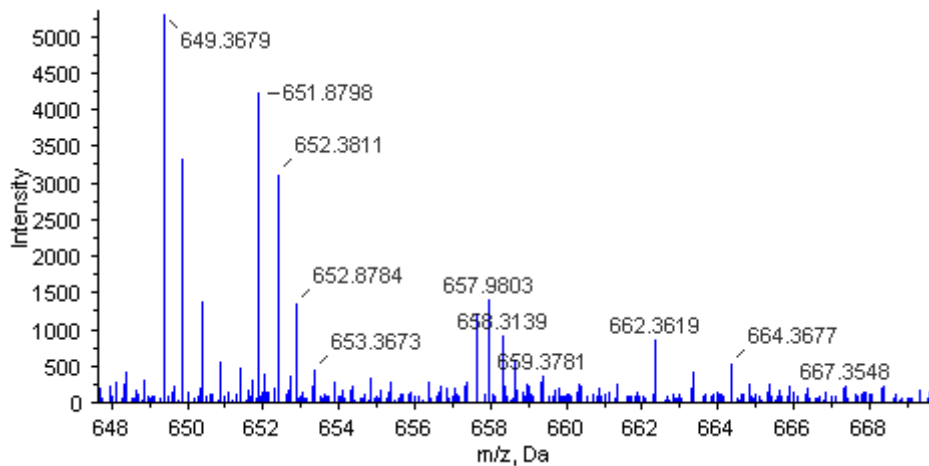

## Sequence Coverage and Matched peptides: in different color

MKDTDFFFSALLKLVESLSSPKFQDGLRRLPHLRSQILLFPNCPFLFSHFHCSEMAMIDEPLYPIAVL  
IDELKNEDIQLRLNSIRRLSTIARALGEERTRKELIPFLSENDDDEVLLAMAEELGVFIPYVGGVEH  
ANVLLPPLETLCTVEETCVRDKAVESLCRIGAQMREPDLVESFIPLVKRLAAGEWFTARVSSCGLFHIA  
YPSAPETLKTELRAIYSQLCQDDMPMVRSAASNLGKFAATVEAAHLKADIMSI FEDLTQDDQDSVRL  
AVEGCAALGKLLLEPQDCVAHILPVIVNFSQDKSWRVRYMVANQLYELCEAVGPEPTRSDLVPAYVRLLR  
DNEAEVRIAAAGKVTKFCRILNPELAIQHILPCVKELSSDSSQHVR SALASVIMGMAPVLGKDATIDQL  
LPIFLSLLKDEFDPVRLNIIISKLDQVNQVIGIDLLSQSLLPAIVELAEDRHWRVRLAIEYIPLLASQL  
GVGFFDDKLGALCMQWLKDKVYSIRDAAANNVKRLAEFGPDWAMQHIIPQVLDMINNPHYLYRMTILH  
AISLLAPVMGPEITCSKLLPVVINAAKDRVPIKFNVAKVLQSLTPIVDQSVVDKTIRPCLVELSEDPD  
VDVRFASQALQASDQIMSS



# Protein No.: I-1072

**Protein name and Species:**

**Long-chain acyl-CoA synthetase 4 OS=Ricinus communis**

**GN=LACS4 PE=2 SV=1**

**Accession: tr|B3TZ27|B3TZ27\_RICCO**

**Unused ProtScore: 2.07**

**Seq Cov %: 6.5**

**ITRAQ Changed Ratio:**

**117: 115=E3TL: D3TL=0.42**

**116: 114=E5TL: D5TL=1.36**

**Annotated typical Precursor MS Region:**

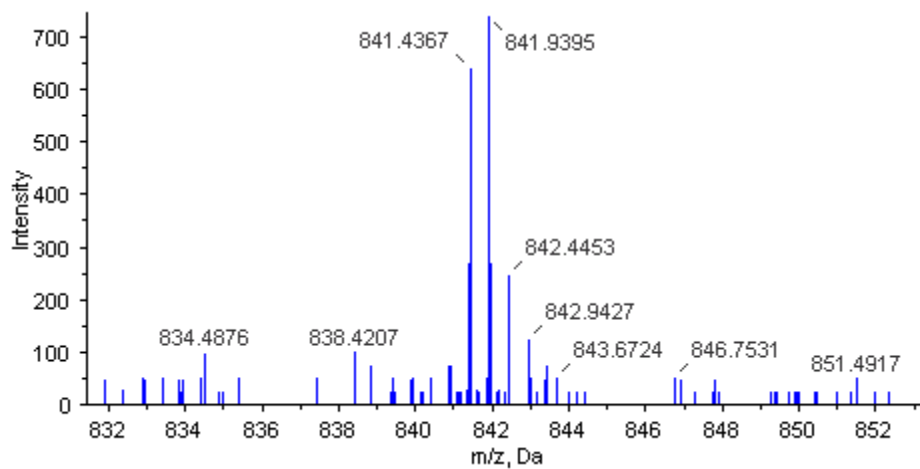

## Sequence Coverage and Matched peptides: in different color

MAQQRQRKYL**I****E****V****E****K****A****K****E****A****K****D****G****K****P****S****V****G****P****V****Y****R**SLFAKDGFPPIPGLDSCWDVFRMSVEKYPNNPMLGHR  
EFVNGKAGKYVWQTYK**Q****V****Y****D****L****V****I****K**VGNAIRSCGVEPGEKCGIYGANSAEWIMSMEACNAHGLYCVPLYD  
TLGAGAVEYIICHAEVSI AFVVEEKKIPELLKTFPSAAQYIKTIVSFGNIAREQREEMEFGLVAYSWED  
FLKLGGENKQYDLPEKKK**S****D****I****C****T****I****M****Y****T****S****G****T****T****G****D****P****K**GVMISNDSIVTIIAGVRRLLESVNEQLTSEDVYLS  
YLPLAHIFDRVIEELFISHGASIGFWRGDVK**L****L****I****E****D****I****G****E****L****K****P****T****I****F**CAVPRVLDR**I****H****S****G****L****T****Q****K****I****S****S****G****G****F****L**  
**K****N****K****L****F****N****L****A****S****Y****K****L****S****C****M****K****K****G****L****A****H****D****E****A****S****P****L****S****D****K****L****V****F****D****K****V****K**QGLGGKVRLILSGAAPLAIHVEAFLRVVS  
CAHVLQGYGLTETCAGTFVSLPNEMAMLGTVGPPVPNVDCLESVPEMNYDALSSSTPR**G****E****I****C****V****R**GSTVTFAG  
YYKREDLTKEVLIDGWFHTGDIGEWQADGSLKIIDRKKNIFKLSQGEYVAVENLENIYGLASDVDSIWV  
YGN SFESFLVAVVNP NKQALEHWAQENSVDGDFKSLCENPRAK**Q****Y****I****I****G****E****L****T****K**IGKEKKLKG FESIK**A****V****H**  
**L****D****P****E****P****F****D****I****E****R****D****L****L****T****P****T****Y****K**KKRPQLLKYYQKVIDD MYKNASKPSA

# Protein No.: I-1081

**Protein name and Species:**

**Malate dehydrogenase OS=Vitis vinifera**

**GN=VIT\_07s0005g03350 PE=3 SV=1**

**Accession: tr|F6HZK0|F6HZK0\_VITVI**

**Unused ProtScore: 2.06**

**Seq Cov %: 27.4**

**ITRAQ Changed Ratio:**

**117: 115=E3TL: D3TL=0.28**

**116: 114=E5TL: D5TL=0.62**

**Annotated typical Precursor MS Region:**

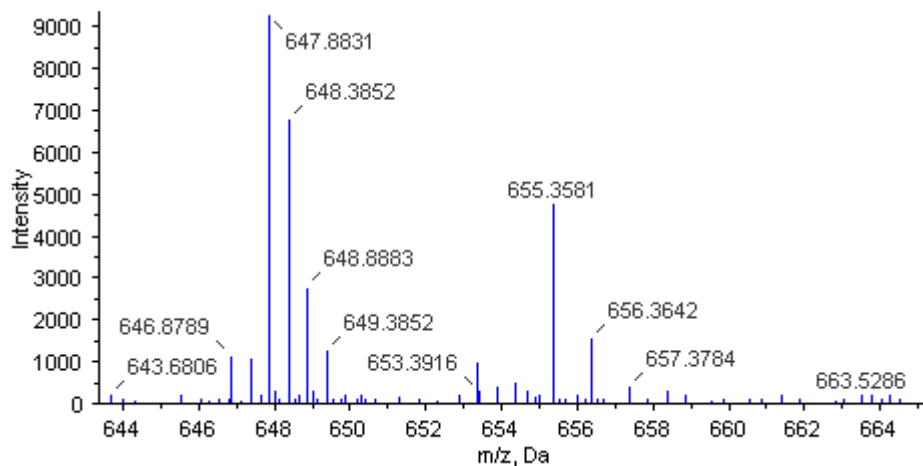

## Sequence Coverage and Matched peptides: in different color

MAEDVPRGQTSGLTKSSGTQRRFPLPCSPAIP**TMAK**EPV**RLVTGAAGQIGYALVPMIAR**GVMLGADQP  
VIL**HMLDIPPAEALNGVKMELVDAAFPLLK**GVVATTDVVEACTGVNIAVM**VGGFPR**KEGMERKDVMSK  
NVSIIYKSQASALE**NHAAANCKVLVVANPANTNALILKEFAPSIPEK**NI**SCLTRLDHNR**ALGQV**SERLNV**  
**QVSDVKNVLIWGNHSSIQYPDVNHATVK**TPAGEKPVRGLVGDDAWLN**GEFITTVQQRGAAI**IK**ARKLSS**  
**ALSAASAACDHIR**DWVLGTPEGTWVSMGVYSDGSYNVPAGLIYSFPV**TCCAGEWKIVQGLHIDEFSR**KK  
**LDLTAQELSEEK**ELAYSCLS

# Protein No.: I-1082

## Protein name and Species:

Aspartyl aminopeptidase-like protein OS=Populus trichocarpa

GN=POPTRDRAFT\_835204 PE=3 SV=1

Accession: [tr|B9IF79|B9IF79\\_POPTR](#)

Unused ProtScore: 2.06

Seq Cov %: 8

## ITRAQ Changed Ratio:

117: 115=E3TL: D3TL=2.05

116: 114=E5TL: D5TL=1.06

## Annotated typical Precursor MS Region:

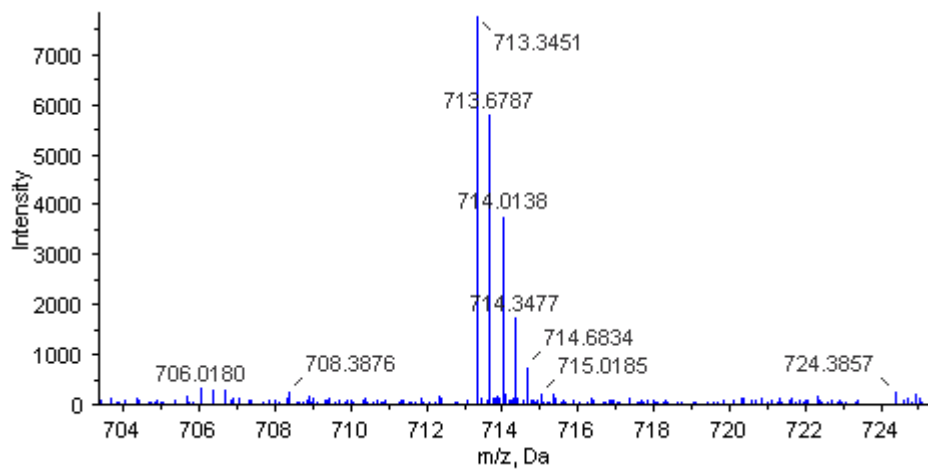

## Sequence Coverage and Matched peptides: in different color

MANNNKEQEYCVASDLIDFLNASPTAFHAVEEAKRRLKNAGYEQVSERHDWKLEAGKRYFFTRNHSTIL  
AFAIGKKYVAGNGFYIVGAHTDSPCLKLKPVSKVTKGGFLEVGVQTYGGGLWHTWFDRDLTVAGRVIIVK  
EEKDGLVSYSHRLVRIEPPIMRVPTIAIHLERTVNTDGFKVNTQSQQLLPVLATSIKAE LNKAAAENGPV  
KSEEVQADGKKSDKGTISSKHSLVLEMIANQIGCKVDDICDFELQACDTQP SLIAGAAKEFIFSGRLD  
NLCSSFCSLKALIDATSSSESDLEDESGV RMVALFDHEEIGSDSAQGAGSPVMLDALSRITSSFN SDSL  
LPKAIQKSFLVSADMAHALHPNYMDKHEENHQPKLHGGLVIKHANQR YATNAIT SFLFREIATKHDL P  
TQDFVVRNDMGCSTIGPILASGVGIRTVDVGAPQLSMHSIREMCSVDDVKYSYEHFKAFFQDISHLDA  
KITVDM

# Protein No.: I-1085

**Protein name and Species:**

**L-allo-threonine aldolase, putative OS=Arabidopsis thaliana**

**GN=T27C4.17 PE=4 SV=1**

**Accession: tr|Q9M835|Q9M835\_ARATH**

**Unused ProtScore: 2.06**

**Seq Cov %: 7.6**

**ITRAQ Changed Ratio:**

**117: 115=E3TL: D3TL=1.58**

**116: 114=E5TL: D5TL=1.04**

**Annotated typical Precursor MS Region:**

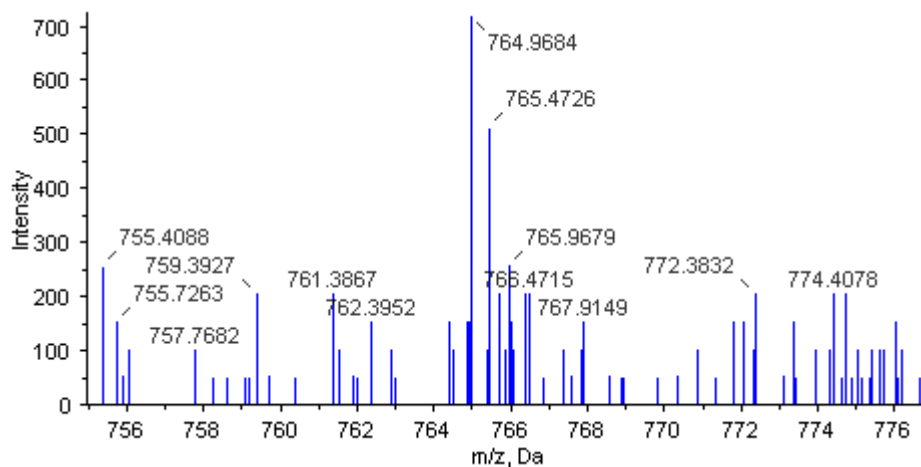

## Sequence Coverage and Matched peptides: in different color

MVTPTTIIRTVDLRSDTVTKPTESMRSAMANAQVDDDDVLGNDPTALRLEKEVAE IAGKEAAMFVPSGTMG  
NLISVLVHCDEERGSEVILGDDSHIHIYENGGVSSLGGVHPRTVKNEEDGTMEIGAIEAAV RSPKGLHH  
PVTKLICLENTQANCGGRCLPIEYIDKVGELAKKHGLKLHIDGARIFNASVALGVPVKRIVQAADSVSI  
CLSKGIGAPVGSVIVGSKFITKARWLRKTLGGMRQIGVLCAAALVALHENVAKLEDDHKKARVLAEG  
LNRIERLRVNVAAVETNIVNPKFGAEEACKSLEDVGVLVIPQATFRIRIVLHHQISDVDVEYVLSCFEV  
CSLLSSTDMCFDIFNFFATLYSFID



# Protein No.: I-1120

**Protein name and Species:**

**Exportin-1 OS=Solanum lycopersicum GN=Xpo1 PE=2 SV=1**

**Accession: [tr|D1MAF2|D1MAF2\\_SOLLC](#)**

**Unused ProtScore: 2.03**

**Seq Cov %: 10.2**

**ITRAQ Changed Ratio:**

**117: 115=E3TL: D3TL=0.60**

**116: 114=E5TL: D5TL=4.17**

**Annotated typical Precursor MS Region:**

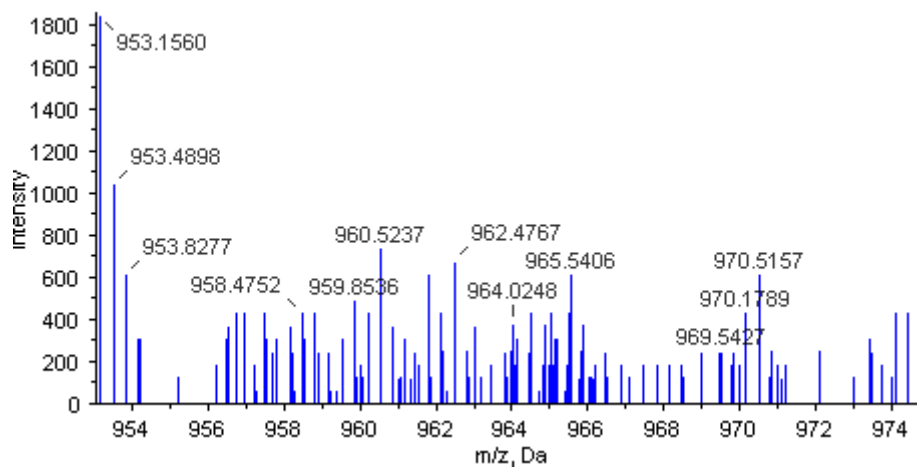

## Sequence Coverage and Matched peptides: in different color

MAAEKLR**DLSQPIDVSLLDATVAAFYGTGSK**ERAAADHILRDLQNNPDMWLQVVHILSSTQSLN**TKFF**  
**ALQVLEGV**IKYRWNALPVEQRDGMKNYISEVIVKLSSEASLRERERLY**ISK**LNIIILVQILKHEWPARWR  
**SFIPDLVAAAKTSETICENCMAILKLLSEEVDFSR**GEMTQQKIKELKQSLNSEFQLIHELCLYVLSVS  
HRTELIRATLTLHAFLSWIPLGYIFESTLLEILLKFFPLPSYRNLTQCLTEVAALNFGDFYNEQYIK  
MYTIFMGQLQSVLPPNTSIPEAYANGSNEEQAFIQNLALFFTSFFKSHIRVLESSQENIGALLVGLLEYL  
INISYVDDTEVFKVCLDYWNSLVLELFEAAHHNLDNPAMTTNMMGLQMPLLSGMNDGLGAQLMQR**RQLY**  
**SGPMSK**LRLLMISR**MAKPEEVLIVEDENGNIVR**ETMK**DNDVLVQYK**IMRETLIYLSHLDHDDTEKQMLK  
KLSNQLNGEDWSWNNLNTLCWAIGSISGSMVEEQENRFLVMVIR**DLLNLCEITK**GKDNK**AVIASNIMYV**  
**VGQYPR**FLRAHWKFLKTVVNKLFEFMHETHPGVQDMACD<sup>1</sup>FLKIVQKCKRKFVVVQVGENEPPVSELLT  
TLPTTIADLEPHQIHTFYESVGQMIQAEPDPQK**RDEYLQRLMELPNQRWNEIIGQARQSV**DYLDQDVI  
RAVLN**ILQ**TNTSAASSLGTYFLPQISLIFLDMLNVYR**MYSELISTSIAQGGPYASRTSIVK**LLRSVKRE  
TLK**LIETFLDKAEDQSHIGKQFVPPMMDPVLGDYAR**NVPDARESEVLSLFATIINKYKGAMIEDVPRIF  
EAAFQCTLE**MITKNFEDYPEHRLKFFSLLR**AIATHCFAALIRLSSEQLKLVMSI IWAFRHTERNIAET  
GLNLLAMLKNFQNSEFANQFYRTYYLTIEQEIFAVLTDTFHKPGFKLHVVLVQLHLFCMVVMLSEPLWD  
ASTVPCSYPNNVEFVREYTIKLLSTSFPMNTAAEVTQFVSGLFDSTNDLPTFKNHIRD<sup>2</sup>FLVQSK**EFSAQ**  
**DNKDLAEEAAAQR**ERERQRMRSIPGLIAPNEIQDEMVD<sup>3</sup>S

# Protein No.: I-1121

**Protein name and Species:**

**Glucose 4-6-dehydratase, putative OS=Ricinus communis**

**GN=RCOM\_0464520 PE=4 SV=1**

**Accession: tr|B9SR17|B9SR17\_RICCO**

**Unused ProtScore: 2.03**

**Seq Cov %: 25.7**

**ITRAQ Changed Ratio:**

**117: 115=E3TL: D3TL=2.13**

**116: 114=E5TL: D5TL=0.82**

**Annotated typical Precursor MS Region:**

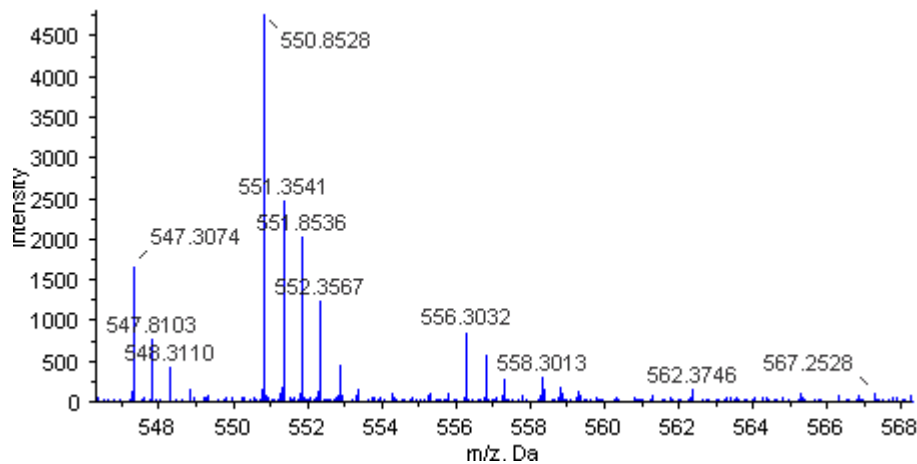

**Sequence Coverage and Matched peptides: in different color**

MAKEVSNGDHSSASKPPPTPSPLRFSKFFQSNMR **ILVTGGAGFIGSHLVDK**LMENEK**NEVIVVDNYFTG**  
**SK**DNLKKWIGHPRFELIRHDVTEPLLIIEVDQIYHLACPASPIFYKYNPVKTIK**TNVIGTLNMLGLAKRV**  
GARILLTSTSEVYGDPLVHPQEESYWGNNPIGVRSCYDEGKR**VAETLMFDYHRQHGI**EIRIAR**IFNTY**  
**GPR**MNIDDGR**VVSNFIAQAVRNEPLTVQAPGTQTRSF**CVSDMVDGLIR**LMEGENTGPINIGNPGEFTM**  
**LELAETVK**ELINPDVEIAKVENTPDDPRQRKPDITKAKELLGWEPKIKLR**DGLPLMEDDFR**LRLGVPRK  
K

# Protein No.: I-1130

Protein name and Species:

copper transport protein [Arabidopsis thaliana]

OS=Arabidopsis thaliana PE=4 SV=1

Accession: tr|Q8LCK3|Q8LCK3\_ARATH

Unused ProtScore: 2.03

Seq Cov %: 23.3

ITRAQ Changed Ratio:

117: 115=E3TL: D3TL=0.42

116: 114=E5TL: D5TL=0.88

Annotated typical Precursor MS Region:

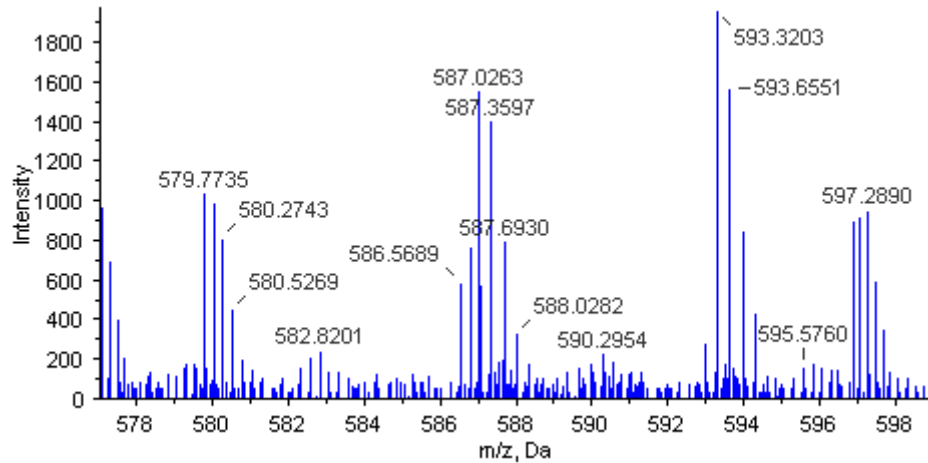

Sequence Coverage and Matched peptides: in different color

MAQKVVLLK**VL****TM****TD****DK**TKQK**A****I****E****A****A****A****D****I****F****G****V****D****S****I****A****A****D****M****K****D****Q****K****L****T****V****I****G****L****M****D****A****V****A****V****V****K****K****L****K****K****V****G****K****V****D****L****I****S****V**  
**G****P****A****K****E****E****K****K****E****E****K****K****E****E****K****K****E****K****K****E****K****K****E****E****K****K****E****E****K****K****E****E****E****P****K****K**

# Protein No.: I-1136

**Protein name and Species:**

**V-type H<sup>+</sup>-transporting ATPase subunit I; At2g21410/F3K23.17**

**OS=Arabidopsis thaliana GN=VHA-A2 PE=2 SV=1**

**Accession: tr|Q9SJT7|Q9SJT7\_ARATH**

**Unused ProtScore: 2.02**

**Seq Cov %: 3**

**ITRAQ Changed Ratio:**

**117: 115=E3TL: D3TL=0.51**

**116: 114=E5TL: D5TL=1.13**

**Annotated typical Precursor MS Region:**

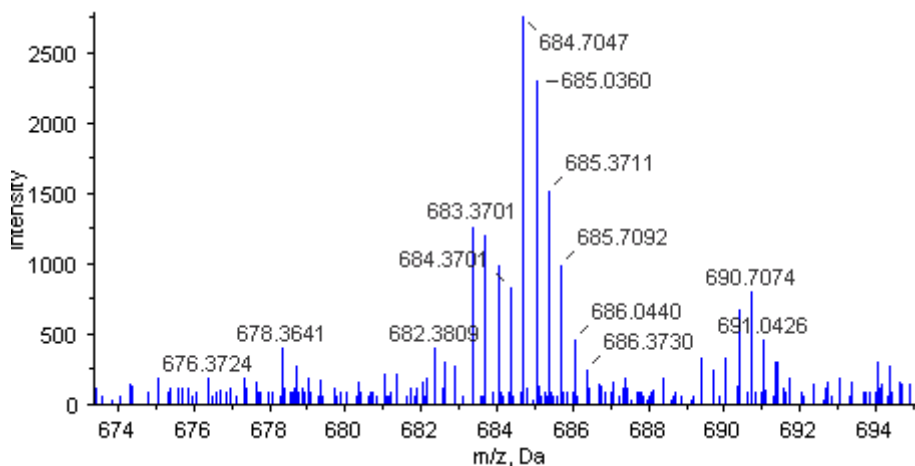

## Sequence Coverage and Matched peptides: in different color

MAESHGGGGCCPPMDLMRSEPMQLVQVIVPMESAHLTVSYLGDLGLVQFKDLNSEKSPFQRTYAAQIK  
RCGEMARKIRFFKEQMSKAGVTPKETLDRENDIDLDDVEVKLEEELEAEELVEINANNDKLQRSYNELVEY  
KLVLEKAGEFFASAHRSATAQQSEIETEQVGEDLLEAPLLQEEKSVDPTKQVKLGFLTGLVPREKSMVF  
ERILFRATRGNIFIRQSVIEESVVDPNNGEKAENFVVFYSGERAKSKILKICEAFGANRYPFSEDLG  
KQAQMMTEVSGRLSELKTTIGAGLDQRNILLETTIGDKFEQWNLKIRKEKAIYHTLNMLSLDVTKKCLVG  
EGWSPVFAATEIQDALHRAAVDSNSQVGSIFQVLRTEKMPPTFFRTRNKFTTAFQEIVDAYGVAKYQEAN  
PSVFTIVTFPFLFAVMFGDWGHGICLLLATMYLILREKKLSSQKLGDIMEMAFGGRYVIFMMSLFSIYT  
GLIYNEFFSIPYPLFASSAYDCRDVSCSEATTIGLIKTRDTPFGVDPVWHGTRSELPLNSLKMMSI  
LIGVAQMNLGIIMSFFNAKFFKSAVNIWFQFVPMIFLNCLFGYLSVLI I IKWCTGSQADLYHVMIMYF  
LSPMDDLGENQLFPNQKIVQLTFLFLALVSPWMLLPKPFILKKQHEARHQGLSYAQLDETDESLOVET  
NGGGHGHEEFSEIFVHQLIHTIEFVLGAVSNTASYLRLWALS LAHSELSSV FYEKVLLMAWGFNNVF  
IWIVGILVFI FATVGVLLVME TL SAFLHALRLHWVEYQNK FYEGDGYK FAPFTFTLVGNEDE

# Protein No.: I-1137

**Protein name and Species:**

**Translation elongation factor OS=Populus trichocarpa**

**GN=POPTRDRAFT\_814408 PE=3 SV=1**

**Accession: tr|B9IF97|B9IF97\_POPTR**

**Unused ProtScore: 2.02**

**Seq Cov %: 26.2**

**ITRAQ Changed Ratio:**

**117: 115=E3TL: D3TL=0.61**

**116: 114=E5TL: D5TL=0.53**

**Annotated typical Precursor MS Region:**

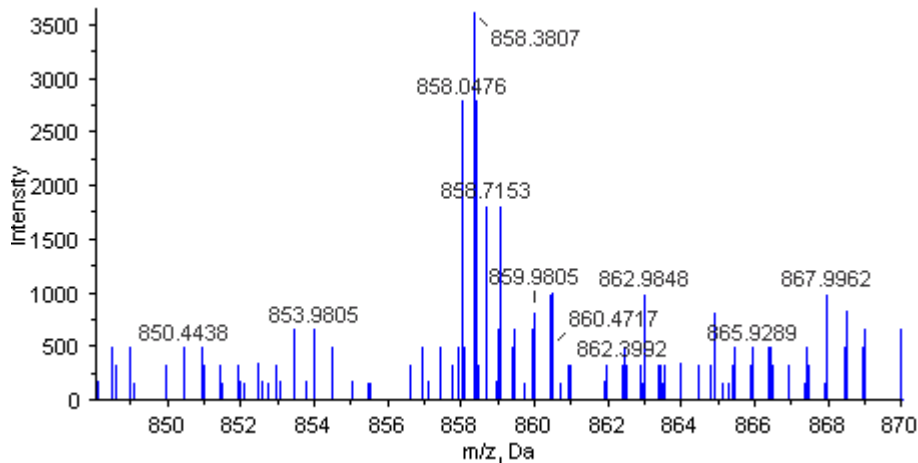

**Sequence Coverage and Matched peptides: in different color**

MAVTFYDLTSAAGLK~~KLDDFLLSR~~SYISGYQASKDDLTVYSALSSAPSAEHVNVYRWYTHIDALLRISG  
VEAEGCGVVVKGSAPITEEAIATPPSAETKAAEDDDDDVDLFGEEETEEKKAAEERAATVKAASKKKE  
SGKSSVLLDVKPWDEETDMK~~KLEEAVR~~SVEMEGLLWGASKLVPVGYGIK~~KLTI~~MLTIVDDLVSVDTLIE  
ERLTTEPINEYVQSCDIVAFNKKGSR

## Protein No.: I-1155

**Protein name and Species:**

**Galactinol-sucrose galactosyltransferase OS=Populus  
trichocarpa GN=POPTRDRAFT\_762165 PE=4 SV=1**

**Accession: tr|B9HA87|B9HA87\_POPTR**

**Unused ProtScore: 2.01**

**Seq Cov %: 8.5**

**ITRAQ Changed Ratio:**

**117: 115=E3TL: D3TL=11.07**

**116: 114=E5TL: D5TL=3.94**

**Annotated typical Precursor MS Region:**

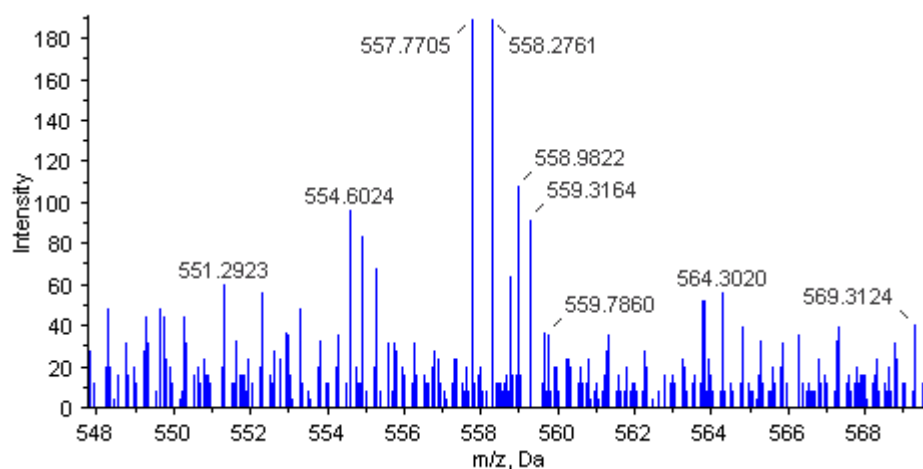



## Sequence Coverage and Matched peptides: in different color

MTIKPAVR**ISDGKLI**VKDRTILTGVPDNVIATSGSTSGPVEGVFLGAVFDQENSRHVTSLGALRDVRFM  
ACFRFKLWWMQAQKMGDQGR**DIPLETQFLLVETK**DGSHLESDDGDEDNQVVYTVFLPLIEGSFRAQLQGN  
VSDELELCLLESQDAETKTSSFTHTLFIHAGTDPFRITITEAV**RAVK**LHLKTFRQRHEKRLPGIIDHFGWC  
TWDAFYQEVTQEGVEAGLQSLASGGTPPKFVIIDDGWQSVGGDPEEETNGQDVKKQDQQPLLRLTGIKE  
NAKFQKKDDPAAGIKSIVNIAKEKYGLKYVYVWHAITGYWGGVRPGVKEMEEYGSMMKYPMVSKGVVEN  
EPIWKNDALTLQGL**L**VNPKNVYRFYNELHSYLAAGIDGVK**VDVQCILETLGAGLGGR**VELTR**QYHQA**  
**LDASVAR**NFLDNGCIACMSHNTDALYCSKQTAVVR**ASDDFYPR**DPVSHTIHIAAVAYNSVFLGEFMQPD  
WDMFHSLSHAAAHEYHASAR**AI**SGGPIYVSDAPGKHNFELLKK**VVLPDGSILR**ARLPGRPTSDCLFSDPAR  
DGVSLKLIWNMNKFTGVLGVYNCQGAAWSSTERKNAFHQTTTEALTGTIRGRDVHLVAEAATDPNWDGN  
CAFYCHRTGELITLPYNAALPVSLK**VLEHDIFTVTPIK**VLAPGFSFAPLGLINMFNAGGAIEGLKYEVK  
GKVCVEVK**GCGK**FGAYSSAKPRKCIVDSNVVDFVYDSNSGLVGFNLDLSLLEEGKLRIVEIEL

# Protein No.: I-1157

**Protein name and Species:**

**Pyrophosphate-energized membrane proton pump 3 [Vitis vinifera] OS=Vitis vinifera GN=VIT\_09s0054g00700 PE=3 SV=1**

**Accession: tr|D7SS21|D7SS21\_VITVI**

**Unused ProtScore: 2.01**

**Seq Cov %: 3.8**

**ITRAQ Changed Ratio:**

**117: 115=E3TL: D3TL=1.60**

**116: 114=E5TL: D5TL=1.63**

**Annotated typical Precursor MS Region:**

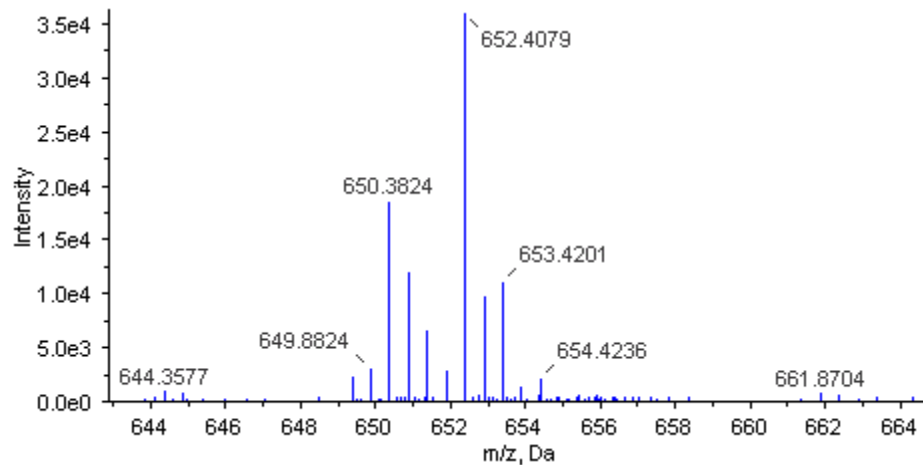

## Sequence Coverage and Matched peptides: in different color

MDDDVESGALGPYQDKPR**IFPNMR**SKSYTPLIFRIFMGINVRVLFVLLLLLGLGAVFYVGARTSPILV FV  
FSVCIISFLLSVYLTWKVWLAKDEGPPEMAQISDAIRDGAEGFFRTQYGTISKMAMLLALVILSIYLFRS  
TTPQQESSGIGRSTTAYITVA AFL LGALCSGIAGYVGMWVSVRANVRVSSAARRSAREALQI A VRAGGF  
SALVVVGM A VIGVAILYATFYVWLGVDSTGSMKVTDLP LLLVGYGFGASFVALFAQLGGGIYTK**AADV G**  
**ADLVGK**VEQGIPEDDPR**NPAVIADLVGDNVGDCAAR**GADLFESIAAEIISAMILGGTMAQRCKIEDPSG  
FILFPLVIHSFDLVISSVGIF SIRGTRDSGVKSPVEDPMAILQKGY SITIILAVLTFGLSTRWLLYTEQ  
APSAWMNFALCGLVGIMTAYVFWWITKYYTDYKHEPVRTLALSSSTGHGTNI IAGVSLGLESTALPVIV  
ISISIVSAFWLGQTSGLVDETGNPTGGLFGTAVATMGMLSTAAYVLTMDMFGPIADNAGGIVEMSQQPE  
SVREITDLLDAVGNTTKATTKGFAIGSAALASFLLF SAYMDEVSAFAHEPFKQVDIAIPEVFVGGLLGS  
MLIFLFSAWACSAVGRTAQEVVNEVRRQFIERPGIMDYKEKPDYGR CVAIVASASLREMIKPGALAIVS  
PIVVGFLFRILGYTGHPLL GAKVVASMLMFATVAGILMALFLNTAGGAWDNAKKYIETG**ALGGK**GSDA  
HK**AAVTGDTVGDPFKDTAGP**SLHVLIKMLATITLVMAPVFL

# Protein No.: I-1171

**Protein name and Species:**

**Glyceraldehyde-3-phosphate dehydrogenase OS=Dimocarpus  
longan PE=2 SV=1**

**Accession: tr|C0LDX2|C0LDX2\_9ROSI**

**Unused ProtScore: 2**

**Seq Cov %: 33.9**

**ITRAQ Changed Ratio:**

**117: 115=E3TL: D3TL=0.61**

**116: 114=E5TL: D5TL=0.22**

**Annotated typical Precursor MS Region:**

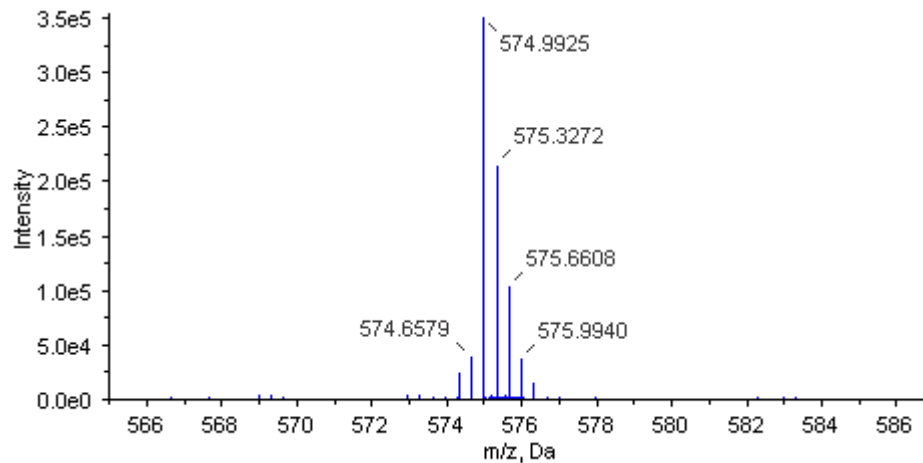

## Sequence Coverage and Matched peptides: in different color

MGKIK**IGINGFGR**IGRLVARVILQSDDELVAVNDPFIDTTYMTYMFKYDSVHGPWKHHELKVKDSK**TL**  
**LFGEK**AVTVFGIR**NPEEIPWQETGAEYVVESTGVFTDK**E**KAAHLK**GGAK**KVVISAPSK**DAPMFVVGVN  
E**HEYKPEIDIVSNASCTTNCLAPLAK**VINDK**FGIVEGLMTTVHSITATQK****TVDGPSMK**DWRGGR**AASFN**  
**IIPSSTGAAKAVGKVLPSLNKLTGMAFR**VP**TVDVLVVDLTVRLEKKASYDEIKAAIKEAADGKLGIL**  
**GYTEDDVVSTDFVGDNRSSIFDAKAGIALNDFVVKLVSWYDNEWGYSSRVVDLIR**HMAKC

# Protein No.: I-1172

Protein name and Species:

Ras-related protein Rab7 OS=Populus trichocarpa

GN=POPTRDRAFT\_712938 PE=2 SV=1

Accession: [tr|A9P8Q6|A9P8Q6\\_POPTR](#)

Unused ProtScore: 2

Seq Cov %: 73.3

ITRAQ Changed Ratio:

117: 115=E3TL: D3TL=0.62

116: 114=E5TL: D5TL=1.21

Annotated typical Precursor MS Region:

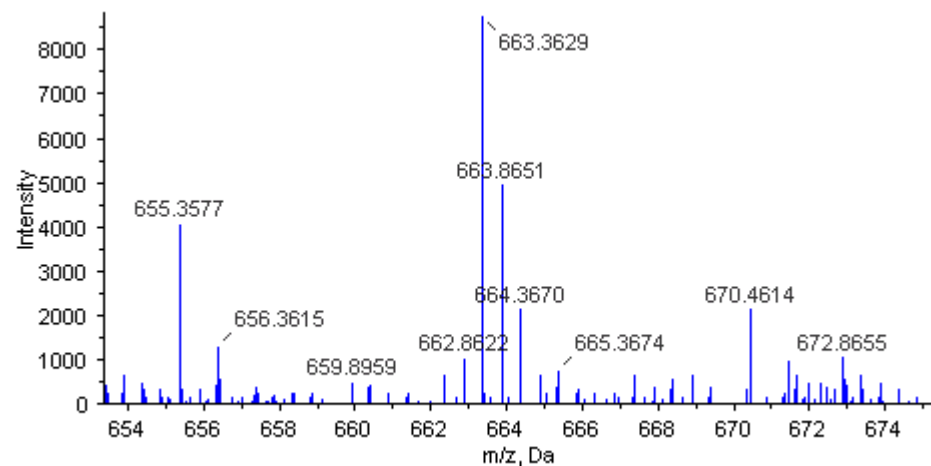

Sequence Coverage and Matched peptides: in different color

MPSRRRTLLKVIILGDSGVGKTSLMNQYVNK**KFSNQYK**ATIGADFLTKEVQFEDRLF~~TLQIWD~~TAGQER  
FQSLGVAFYRGADCCVLVYDVNSMK**SFDHLNNWR**EEFLIQASPSDPENFPFVVLGNKVDVDGGNSRVVS  
EKKARAWCASKGNIPYFETSAKEGVNVEEAFQCIAKNALKSGEEEEIYLPDTIDVGSSSQPRSTGCEC

# Protein No.: I-1173

**Protein name and Species:**

**Heat shock protein 80 (Fragment) OS=Euphorbia esula PE=2**

**SV=1**

**Accession: tr|Q9M5X2|Q9M5X2\_EUPES**

**Unused ProtScore: 2**

**Seq Cov %: 40.9**

**ITRAQ Changed Ratio:**

**117: 115=E3TL: D3TL=3.22**

**116: 114=E5TL: D5TL=1.02**

**Annotated typical Precursor MS Region:**

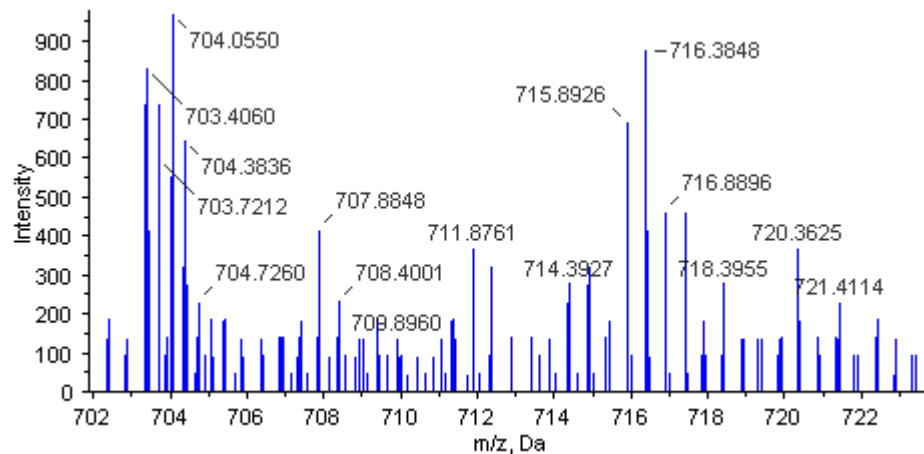

**Sequence Coverage and Matched peptides: in different color**

VKVI RKNLVKKCIELFQEI AENKEDY NK **FYESFSK**NLKL **LG IHEDSQNK**TK **LAELLR**YHSTK **SGDEMTSL**  
**KDYVTRMK****EGQSDIYYITGESK****KAVENSPFLEK**LKKKG YEVLF **MVDAIDFYAVGQLK****EFEGKK****LVSATK**  
**EGLKIDESEDEK**KKKDELKEQ **FEGLCK**VIKDVLGDRVEK **VVVS DR****VVDS PCCLVTGEY****GWTANMER**IMK  
AQUALR **DSSMAGYMSKK****TMEINPENPIMDEL****LRK**RADADKNDKSVKDLVLLLFETALLTSGFSLDDPNTF  
GNRIHRMLK **LGLSIDEDAGEGDADMPAL****EEADADAEGSK****ME**EVD

# Protein No.: I-1179

**Protein name and Species:**

**Coatomer subunit gamma OS=Populus trichocarpa**

**GN=POPTRDRAFT\_821185 PE=3 SV=1**

**Accession: tr|B9HRP1|B9HRP1\_POPTR**

**Unused ProtScore: 2**

**Seq Cov %: 11.3**

**ITRAQ Changed Ratio:**

**117: 115=E3TL: D3TL=1.58**

**116: 114=E5TL: D5TL=0.71**

**Annotated typical Precursor MS Region:**

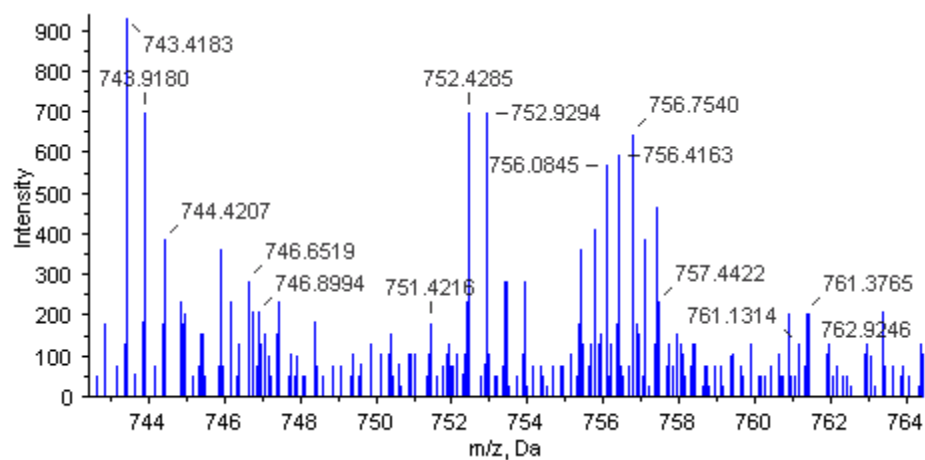



## Sequence Coverage and Matched peptides: in different color

MAQPLVKKDDDDHDEAEYSPFLGIEKGAVLQEARVFNDPQLDPRRCSQVITKLLYLLNQGDYFTKTEAT  
EVFFSVTKLFQSKDFGLRRMVYLI I IKELSPSADEVIIIVTSSLMKDMNSKTDMYRANAIRVLCRITDGTL  
LTQIERYLKQAIVDKNPVVASAALVSGIHLLQTNPEIVKRSNEVQEAVQSRAALVQFHALALLQQIRQ  
NDRLAVSKLVTSLTRGTVRSPMAQCLLIRYASQVIRE SANTQTGDRPFYDFLESCLRHK AEMVIFEAR  
AITELSGVTNRELTPAITVLQLFLSSSKPVLRF AAVRTL NKVAMTHPMAVTNCNIDMESLISDQNR SIA  
TLAITTLK TGNESVDR LMKQITNFMSDI ADEFK IVVVEAIR SLCLKFPLKYRSLMNF LSNILREEGG  
FEYKKAIVDSI VILIR DIPEAKESGLLHLCEFI EDCEFTYLS TQILHFLGIEGPKTTDP SKYIRYIYNR  
VHLENATVRAAAVSTLAKFGAMVDALKPR IFVLLRRCIFDS DDEVDRDRTTLYLSTLGGDGEVVETDRDT  
KTFLFGDLDIPLVNLETSLK NYEPSEEPFDIDSVPK EVKSQPLAEKKAPGK KPTGLGAPPAGPPSTVDA  
YERLLSSIPEFSDFGK PFK SSAPVELTEAET EYAVNVVK HIFDRHVVFQYNCTNTIPEQLLENVSVIVD  
SSEADNFAEVASKPLRSLPYDTPGQTFVAF EKPKGITAVGKFSNTLRFIVKEVDPTTGEAEEDGVEDEY  
QLEDLEVVAADYMMK VGVSNFR NAWESMGDEF EHVDEYGLGPRENLAEAVIAVINLLGMQPCEGTEVVA  
TNSRSHTCLLSGVFLGNVRV LARLQFGIHGSRDVAMKLAVRSEDEAVSDTIHEIVSSG

# Protein No.: I-1180

**Protein name and Species:**

**Actin-like protein (Fragment) OS=Eperua grandiflora GN=Act**

**PE=3 SV=1**

**Accession: tr|D5K0Z8|D5K0Z8\_9FABA**

**Unused ProtScore: 2**

**Seq Cov %: 37**

**ITRAQ Changed Ratio:**

**117: 115=E3TL: D3TL=0.60**

**116: 114=E5TL: D5TL=0.29**

**Annotated typical Precursor MS Region:**

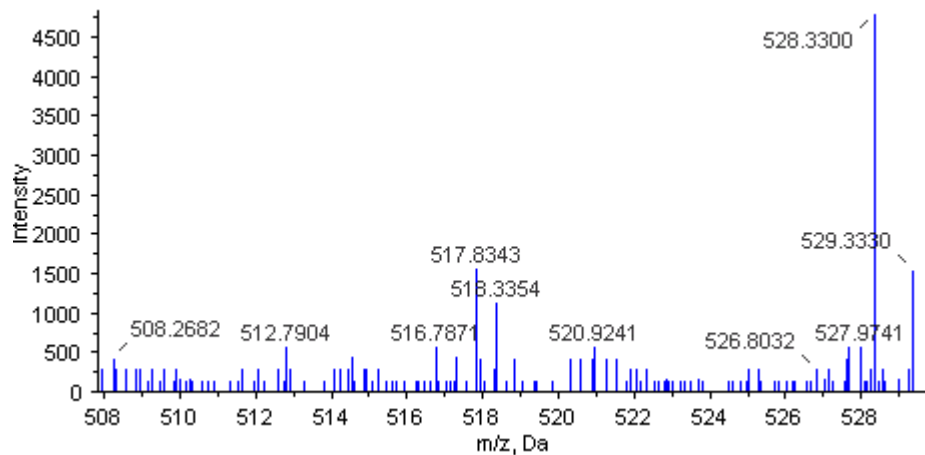

**Sequence Coverage and Matched peptides: in different color**

FNAPAMYVAIQAVLSLYASGR**TTGIVLDSGDGVSH**TVPIYEGYALPHAILR**LDLAGRDLTDALMKILTE**  
**RGYSFTTTAERE**IIVRDMKEKLAYIALDYEQLETSKTSSAVEK**SYELPDGQVITIGNER**FRCPEVLFQP  
SMIGMEAA

# Protein No.: I-1186

**Protein name and Species:**

**Luminal-binding protein 5 OS=Populus trichocarpa**

**GN=POPTRDRAFT\_570800 PE=3 SV=1**

**Accession: tr|B9I7J3|B9I7J3\_POPTR**

**Unused ProtScore: 2**

**Seq Cov %: 8.5**

**ITRAQ Changed Ratio:**

**117: 115=E3TL: D3TL=0.60**

**116: 114=E5TL: D5TL=0.25**

**Annotated typical Precursor MS Region:**

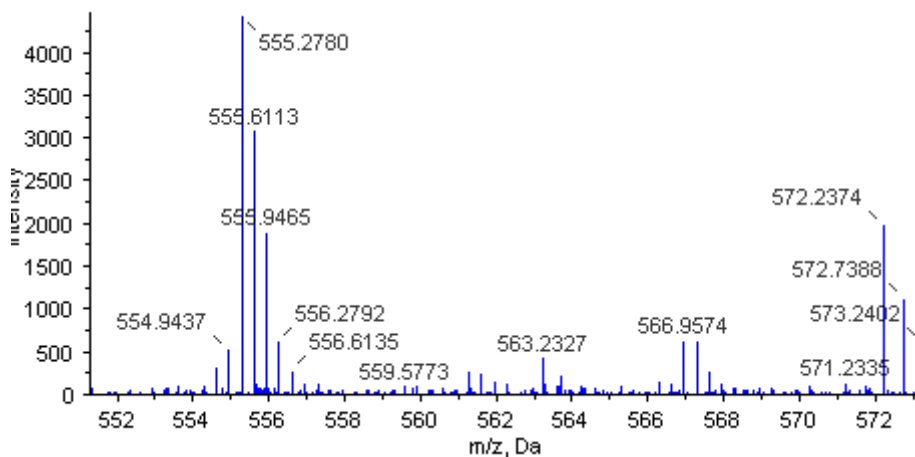

## Sequence Coverage and Matched peptides: in different color

MRVKHKAFAFLFLFVSEYYFLGLVVAADDGPKLGTVIGIDLGTTYSCVAVSR**DGHVEIANDQGNR**VT  
PSWVAFTDTERLIG**EAAK**NQAPMNPERTI**FGVK**RLIGRKFDDPEVQRDIKFLPYKVVNKDGKSYIQVKV  
KGETKVFSPPEISAMILGKMKETAESYLGKK**IKNAVVTVPAYFNDAQR**QATK**DAGIIAGLNVPRIINEP**  
**TAAAIAYGLDKK**GGDMNILVYDLGGGTFDVSILTIDNGVFEVLSTSGDTHLGGEDFDQRLMDYFINLVK  
KKYNKDMSKDKKALGKLRRECERAKRALSSQHQVRVEIESLIDGIDFSEPI**TRARFEELNMDL**FKKTLG  
IVKK**AMDDAGL**KKADIKEIVLVGGSTRIPKVQEMLKEYFDGKEPNK**GVNPDEAVAYGAAVQGGILS**GEG  
**GEETK**GLLLLDVTPLSLGIETVGGVMTKLIPR**NTVIPTK**KSQIFTTYQDQQTTSIKVYEGERSLTKDC  
RELGR**FDLSGIP**PARGVP**QIEVTFEVDANGILHV**KAEDKAAKKSQS**ITITNDKGRLSQE**EIDRMVK**EA**  
**EEMAEEDK**KVREKIDARNKLETYIYNMRSTINDKDKLADKIDSDDKERIETALKEALEWLDNQN**AEKD**  
DYEEKLKEVEEVCD**PVIK**QVYEKSGSSADSEYEEPND**EL**

# Protein No.: I-1188

**Protein name and Species:**

**Glyceraldehyde 3-phosphate dehydrogenase (Fragment)**

**OS=Mallotus pierrei GN=G3pdh PE=3 SV=1**

**Accession: tr|B2X0F6|B2X0F6\_9ROSI**

**Unused ProtScore: 2**

**Seq Cov %: 45.1**

**ITRAQ Changed Ratio:**

**117: 115=E3TL: D3TL=0.65**

**116: 114=E5TL: D5TL=0.53**

**Annotated typical Precursor MS Region:**

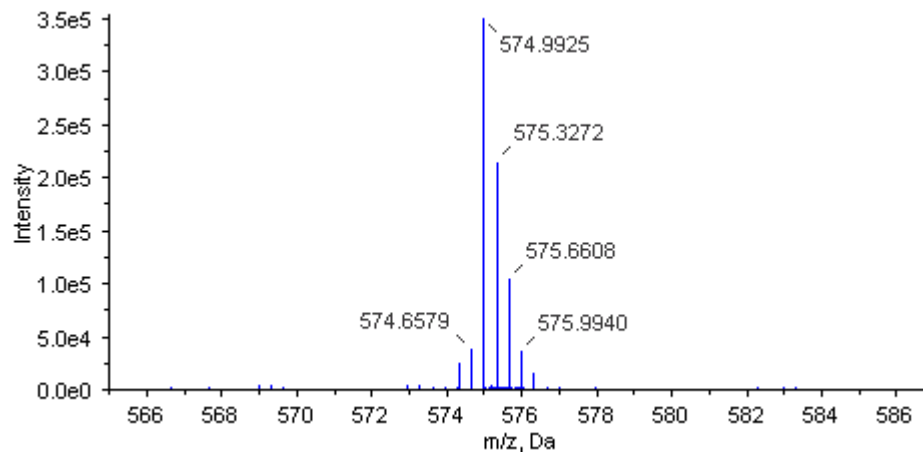

**Sequence Coverage and Matched peptides: in different color**

VXSITATQK**TVDG**PSMKDWRGGR**AASFNIIPSSTGAAKAVGK**VLPSLN**GL**LGMSFRVPTVDVSVVDLT  
VRL**E**KEASYDDIK**TAIKEESE**SGK**L**KGILGYTED

## Protein No.: I-1191

**Protein name and Species:**

**Myosin-Vb-like [Vitis vinifera] OS=Vitis vinifera**

**GN=VIT\_13s0320g00070 PE=4 SV=1**

**Accession: tr|F6GZ28|F6GZ28\_VITVI**

**Unused ProtScore: 2**

**Seq Cov %: 2.9**

**ITRAQ Changed Ratio:**

**117: 115=E3TL: D3TL=2.58**

**116: 114=E5TL: D5TL=1.98**

**Annotated typical Precursor MS Region:**

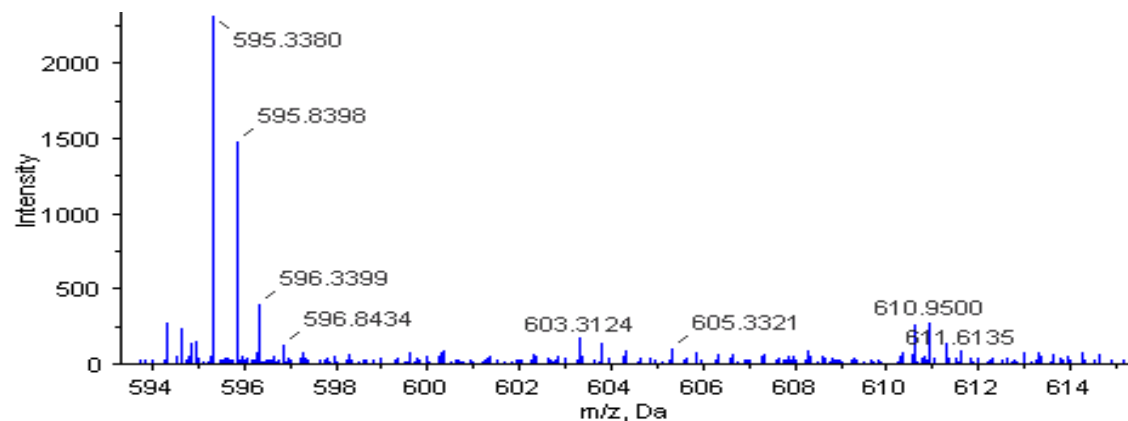

## Sequence Coverage and Matched peptides: in different color

MIKGTVPVNIIVGSHAWAEDPDAAWIDGEEVIGIEGRNATIVTTDGKTIVADISNIYPKDTEAPPAGVDDM  
TKLAYLHEPGVLHNLASRFALNEIYTYTGNILIAVNPFRQLPHLYDIHMMGQYKGAAFGE LSPHLFAVA  
DTCYRAMINEQK**SQSILVSGESGAGK**TETTKMLMRYLAFMGGRSGTEGR**TVEQQVLESNPVLEAFGNAK**  
TVKNNNSSR**FGKFVEIQFDKHGK**ISGAAVRTYLLERSR**VCQVSDPER**NYHCFYMLCAAPPEDVKKFKLG  
DPRSFHYLNQTNQYEVANVNDAREYLETRNAMDVVGISQDEQDAIFRVVAAILHLGNIGFIKKE**ADSS**  
**KLKDEKALYHLRTAAELLM**CDEK**ALED**SLCQRVIVTPDGNITKPLDPLAVFSRDALAKTVYSR**LFDWI**  
**VDK**INSSIGQDPNATSIIIGVLDIYGFESFKINSFEQLCINLTNEKLQQHFNQHVFKME**QEEYK**REEINW  
SYVEFIDNQ**DVLDLIEK**KPGGIIALLDEACMFPKSTHETFAQKMYQTYKGHKRFSPKPLARTDFTINHY  
AGDVIYQADQFLDKNK**DYVVAEHQALLNASK**CPFFVANLFPLLSE**EASK**QSKFSSIGTRFKQQLQALMET  
LSTTEPHYIRCVPNAVLKPAIFENFN**LNQLR**CGGVLEAIRISCAGYPTKRTFDEFFDRFGMLAPDVL  
DGADEKSACIAICDRMGLKGYQIGKTKVFLR**AGQMAELDARTEVLANAAR**RIQRQIQTHLTRKEFIRQ  
RRATIHMQKLWRAQLARKLYESMRREAASVCVQKNVR**AHTAR**RNYTNLQASAMAIQTGLRAMAARNEFR  
YRRRTKAATLIQTQWRGFQAFSAYNQKKATLTLQCLWRGRAARKELRKL RMAAR**ETGALK**EAKDKLEK  
RVEELTWR**LEFEK**HLRIDVEEAKGQEISKLQNALLEMQVQLEEAHAAIIREK**EAAK**IAIEQAPPVLKEV  
PVVDNTKMDLLKNQNEELEGEVSELKKMVAEFEQKYCEAQKENTARLKEAEE SFTRTSQLQETIERLEL  
NLSNLEAENQVLRQALVASTNEDLF**EEMK**ILKDKIANLESENEVLRNQPTSIEQVAALERVPPQVKSF  
DNGHKMEEELQTTKELVPFAPILTKQRSLTDRQQENHDVLIK**CLMEDKRFDK**NRPVAACIVYKALLQWR  
SFEAEKTNIFDRIIHTIRSSIESQESISNLAYWLSTTSTLLFLVQSTLKASNTPNVT SFRSRNSPTTLF  
GRMAQGLRSSSFPMGVSSGYSGMVGKPNTHSKVEPK**YPALLFK**QHLTAYLEKIYGMIRD SLKK**EISPFL**  
**NLCIQAPRSTRAR**SIRGSSKNIHSNIVAKQQASNIHWQNI VNSLDHTL GIMSENHVPSMITRKIFSQVF  
SFINVQLFN**LLLLR**RECCSFSNGEYVKAGLQELEQWCFKAKDEFAGSSWDELQHIRQAVGFVLVHQPQ  
KFLDDITNELCPMLSIPQIYRIGTMFWDDKYGTHGLSPD**VIGK**MRVLMTEDSINMPNNSFLLDVDSRIP  
FSMEEMSRSLIDINLSYVDPPLLRQRSDFFHLLQPTD

# Protein No.: I-1195

## Protein name and Species:

Fructokinase-5-like [Vitis vinifera] OS=Vitis vinifera

GN=VIT\_15s0048g01260 PE=3 SV=1

Accession: [tr|D7U7P5|D7U7P5\\_VITVI](#)

Unused ProtScore: 2

Seq Cov %: 11.3

## ITRAQ Changed Ratio:

117: 115=E3TL: D3TL=2.05

116: 114=E5TL: D5TL=1.05

## Annotated typical Precursor MS Region:

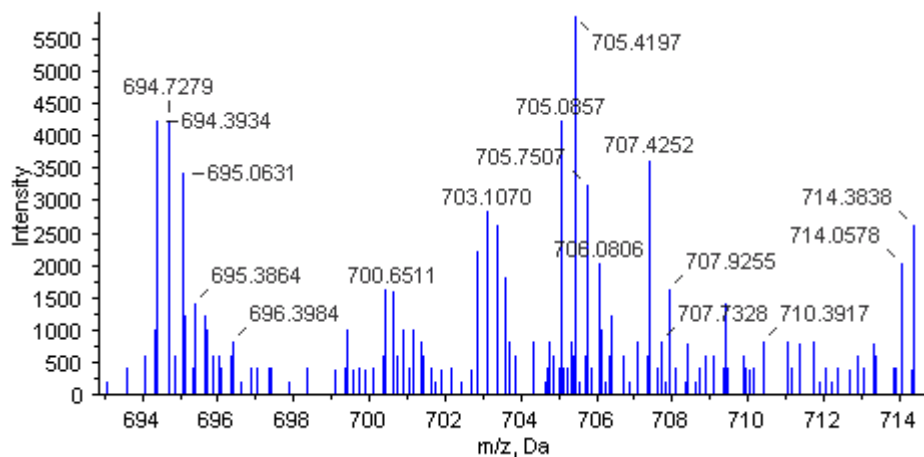



## Sequence Coverage and Matched peptides: in different color

MSKSNRSK**DDEAR**MSGCCFPVNLDRSMKSGLSFKKSSSGSFKGESQEKRPLVVCFGEMLIDFVPTVGGV  
SLSESPAFKKAPGGAPANVAVGISR**LGSSAFIGK**VGEDEFGF**MLADILK**QNNVDSSGMRFDRNAR**TAL**  
**AFVTLR**DDGER**EFMFFR**NPSADMLLRESELDANLIKKASIFHYGSISLIEEPCKSAHLA**AMNIAR**KSGS  
ILSYDPNLRPLWSPETARKTIMSIWNQADLIK**ISEEEITFLTGGDDPNDDNVLK**KLYHSNLKLLVV  
TEGSNGCRYTTKEFKGRV**TGVKVK**AVDTTGAGDAFVGGILNSLAADLNLYKNEEKLRALLFANACGAI  
TVTER**GAIPALPTK**EAVLQILPKANA

# Protein No.: I-1196

**Protein name and Species:**

**Ripening-reduced alpha-L-arabinofuranosidase OS=Carica  
papaya PE=2 SV=1**

**Accession: tr|C9EA44|C9EA44\_CARPA**

**Unused ProtScore: 2**

**Seq Cov %: 5.8**

**ITRAQ Changed Ratio:**

**117: 115=E3TL: D3TL=0.65**

**116: 114=E5TL: D5TL=0.53**

**Annotated typical Precursor MS Region:**

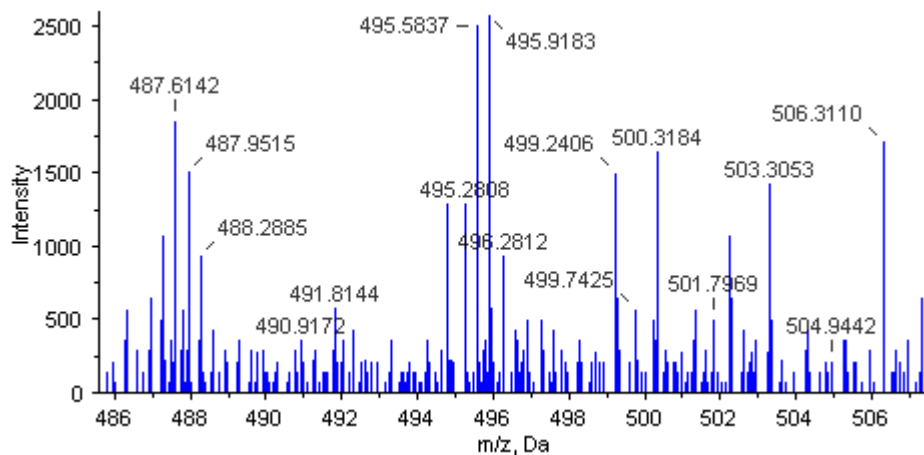

## Sequence Coverage and Matched peptides: in different color

MLWADYAKFLCGEVTMSSCKAASSFSSFLCFFLGACCVYQCFALVGVANVTARLIVDASQGASRPMPET  
LFGIFFEQEINHAGAGGLWDELVSNRGGFEAGGPNTSPNIDPWSIIGDESSVTVSTERSSCFERNKVAL  
R**MEVLCDSR**GANICPSGGVGVYNPGFWGIFLCQNIQGGKYYVLYVVRSPGAIDLVSLSLTSSNGSRTLA  
SSNVIASSSDVSNWTKKELLLLEAKGTDPHSRLQLTTARKGVIWLDQVSAMPLDTYKVQGHGFRSDLVEM  
LLDIKPRFIRFPGGGCFVEGEWLRNAPFRWKESIGPWEERPFGHFGDVWNYWTDDGLGYFEFLQVGLAEDL  
GALPIWVFNNGIGISHNDQVDTSTVLPFVQLQEALDS**IEFAR**GDPDSRWGSVR**AAMGHPEPFDLR**FVAL  
GNEDCWKKNYWPGNYLRFYYAIKRAFPDIK**IISNCDGSSR**QLDHPTDYDFHVVYTSSSNLFSMSHKFD  
**HASR**NGPKVW**AFVSEYAVTGK**DAGTGSLLAALAEAGF**LIGLEK**NSDLVEMTSYAPLNVNDRRWNPD  
IVFDSYRQYGTSPYWVQQFFAESSGATLLNSTLQIDSTSLIASAISWQDEKADKKYIRINNVNFGSNAV  
LRIYVDGMDPNVARLSGLTETVLRSDNVMDENSFENPEKVRLLFLFLENAGEDIEVELSPHSFTS**FDL**  
**LKEYANIRIAGFDSFSKSST**

# Protein No.: I-1203

**Protein name and Species:**

**Ras-related protein RHN1-like [Glycine max] OS=Glycine max**

**PE=2 SV=1**

**Accession: tr|C6TED4|C6TED4\_SOYBN**

**Unused ProtScore: 2**

**Seq Cov %: 16.3**

**ITRAQ Changed Ratio:**

**117: 115=E3TL: D3TL=1.85**

**116: 114=E5TL: D5TL=1.08**

**Annotated typical Precursor MS Region:**

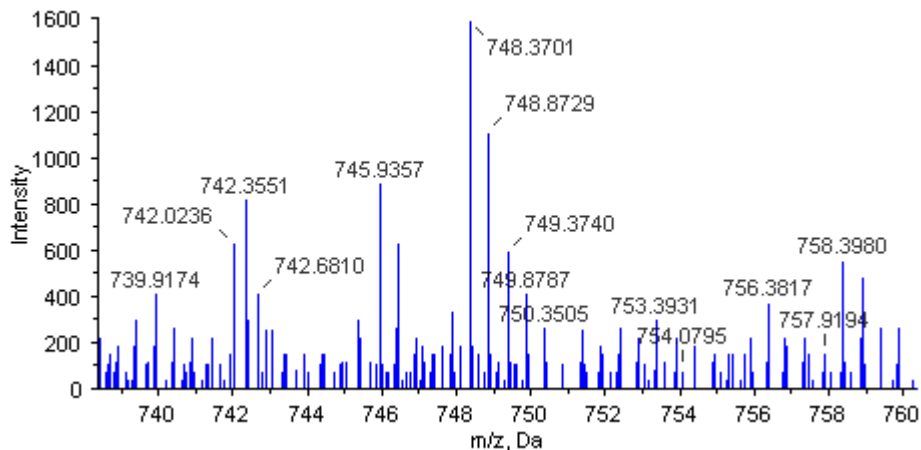

**Sequence Coverage and Matched peptides: in different color**

MATIGHNNLNAKL**VGPS**SLFSISFCFFFLSQSFSIPMMFSPCSFHQVLLGDMGAGK**SSLVLR**FVKGQFL  
EFQESTIGAAAF**FSQTLAVNDATVKFEIWDTAGQER****YHSLAPMYR**GAAAAIIVYGITSSDSFTRAK**WV**  
**QELQKQGNPNMVMALAGNK**ADLEDKRKVTAAEARVYAEENGLFFMETS**AKTASNVDIFYELAK**RLPRA  
QPAQNPAGMVLVDRPAEGTRAASCCS

# Protein No.: I-1206

**Protein name and Species:**

**Enolase OS=Helianthus annuus GN=ENO1 PE=2 SV=1**

**Accession: tr|A9P745|A9P745\_HELAN**

**Unused ProtScore: 2**

**Seq Cov %: 6.1**

**ITRAQ Changed Ratio:**

**117: 115=E3TL: D3TL=0.19**

**116: 114=E5TL: D5TL=0.23**

**Annotated typical Precursor MS Region:**

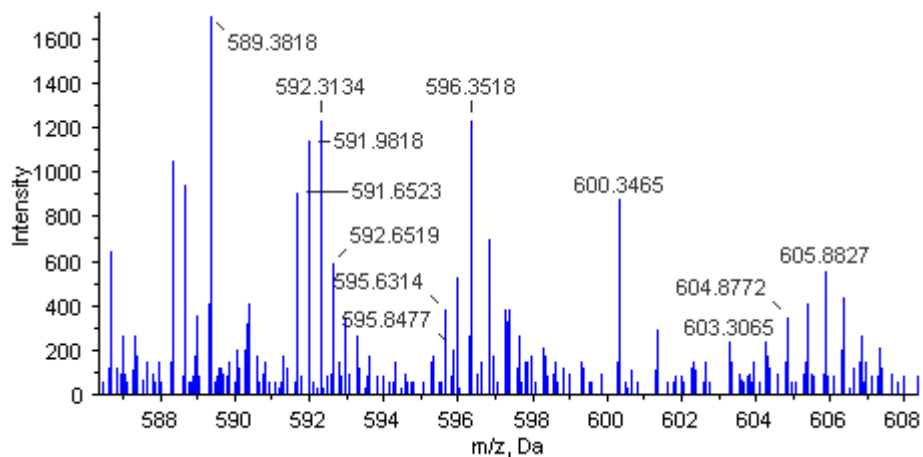

## Sequence Coverage and Matched peptides: in different color

MALAPPTTTTSLSNPLLSSKPSLSSPFVNLPTVSRRSPTKFTVRNSVSVAQSPSVSAAKSSTVKSVKAR  
QIIDSRGNPTVEVDLVTDGLYR**SAVPSGASTGIYEALRLR**DGDKSVYGGKGVNAVKNINEVLGPKLIG  
VDVRNQAEFDGIMLEIDGTPNKSCLGANAILGVSLSACR**AGAGAK**SIPLYKHIQEISGTKELVMPVPAF  
NVIINGGSHAGNNLAMQEFMILPVGATSF AEALRMGSEVYHTLKGIIKAK**YGQDACNVGDEGGFAPNVQD**  
**NREGLVLLIDAIEKAGYTGKIKIGMDVAASEFLTK**DGK**YDLNFK**KQPNDGAHVLSAPSLGDLYREFVRD  
FPIVSIEDPFDQDDWTSWTSLSQSSVDIQLV**GDDLVLVTPK**RIAEGIQKK**ACNALLK**VNQIGTVTESIQ  
AALDSKAAGWGMVSHRSGETEDNFIADLSVGLASGQIKTGAPCRSERLAK**YNQLLR**IEEELGNVRYAG  
EAFRSP

# Protein No.: I-1207

**Protein name and Species:**

**Rubber elongation factor protein, putative OS=Ricinus  
communis GN=RCOM\_1433280 PE=4 SV=1**

**Accession: [tr|B9RFA8|B9RFA8\\_RICCO](#)**

**Unused ProtScore: 2**

**Seq Cov %: 11.2**

**ITRAQ Changed Ratio:**

**117: 115=E3TL: D3TL=1.51**

**116: 114=E5TL: D5TL=0.72**

**Annotated typical Precursor MS Region:**

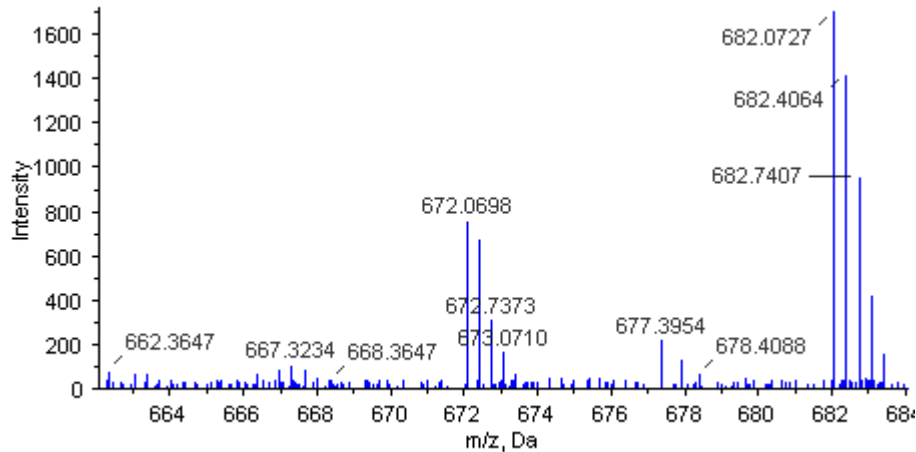

## Sequence Coverage and Matched peptides: in different color

MAEQNVNLLQQMAKENEERLKYLEFVQVAALHAVMTTFANLYVYAKDKAGPLKPGVETVEGTVKSVVGPV  
YDKFHDVPIEVLK FVDRKVDESVTKLDRR VPPVVK QVSAQAYSVAR EAPVAAR AVASEVQRTGVKETAS  
GLAKTLYAMYEPKAKELYSKYEPKAEQCAVSAWRKLNQLPLFPQVAQVFVPTAAYCSEKYNQTVVSTAE  
KGYRVSSYLPLVPTQKIAQVFRNEVPESAPIASS



# Protein No.: I-1210

**Protein name and Species:**

**RNA recognition motif-containing protein [Arabidopsis thaliana]**

**OS=Arabidopsis thaliana GN=At4g17720 PE=2 SV=1**

**Accession: tr|Q8LA96|Q8LA96\_ARATH**

**Unused ProtScore: 2**

**Seq Cov %: 6.7**

**ITRAQ Changed Ratio:**

**117: 115=E3TL: D3TL=5.40**

**116: 114=E5TL: D5TL=1.25**

**Annotated typical Precursor MS Region:**

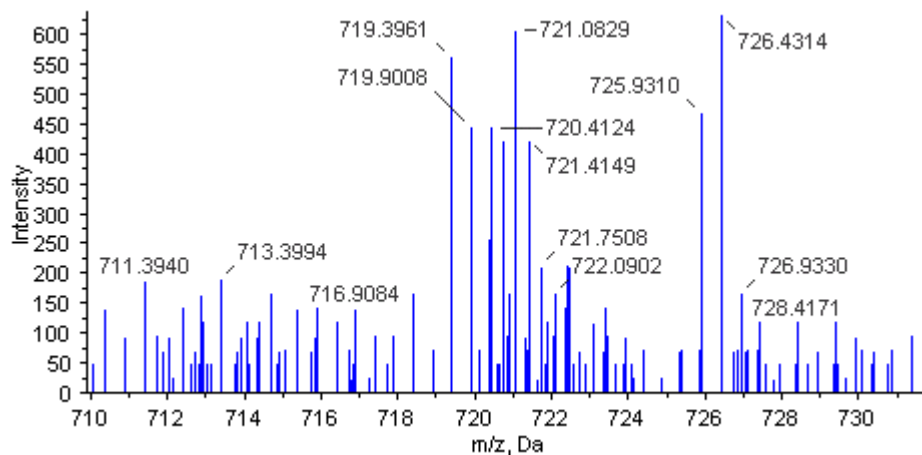

## Sequence Coverage and Matched peptides: in different color

MTMTTVKVSNSVSLGATDRDLKEFFSFSGDILYLETQSETERTKLA~~YVTFK~~DLQGAETAVLLSGATIVDS  
SVIVSMAPDYQLSPEALASLEPKDSNKSPKAGDSVLRK~~AEDVVSMLAK~~~~GFILGK~~DAIAKAKSVDEKHQ  
LTS~~TASAK~~VASFDDKIGFTDKINTGTVVVGEKVVREVDQKYQVSEKTK~~SAIAAAEQT~~~~VSNAGSAIMK~~NRY  
VLTGATWVTGAFNKVAKAAEEVGGKAKEKVGMAEEEDKRKVVDEFARVHLSESPK~~AASSTQEARES~~KL  
SESPEAKKDSEHLEPQSKPLQQQSPPPMASAPAPAQP

# Protein No.: I-1211

**Protein name and Species:**

**GTP-binding protein OS=Nicotiana tabacum GN=SUP1 PE=2**

**SV=1**

**Accession: tr|Q40581|Q40581\_TOBAC**

**Unused ProtScore: 2**

**Seq Cov %: 5.2**

**ITRAQ Changed Ratio:**

**117: 115=E3TL: D3TL=0.20**

**116: 114=E5TL: D5TL=0.51**

**Annotated typical Precursor MS Region:**

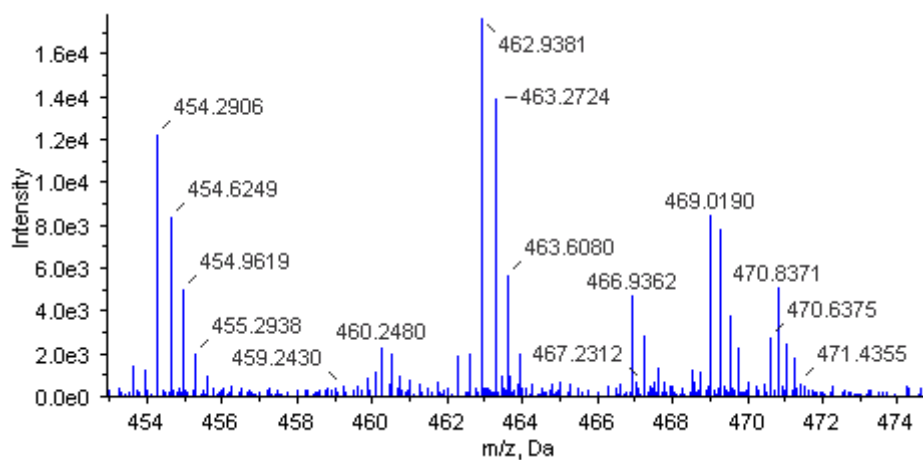

## Sequence Coverage and Matched peptides: in different color

MVNVEDGKPEEAIAKPEKTNGEDSAMAEEGEAGDDEKPDIPEDDELKDEAHPDLEPKNVEPKGIAGKEASP  
PEDIQDEVEVNKKRHLNVVFIGHVDAGKSTIGGQILLLSGQVDDR TIQKYEREAKDKNRESWYMAYIMD  
TNEEERVKGITVEVGRAHFETDTTRFTILDAPGHKSYVPMISGRSQADIGLLVISARKGEFETGYERG  
GQTR EHVQLAKTLGVTKFLVVVNKMDDP TVNWSKERYDEIESK MVPFLRSSGYNVKKDVQFLPISGLLG  
SNLKTRMEKSVCPWWNGPCLFETLDAVEVPPRDPNGPLRMP IIDKFKDMGTVVMGKIESGSIHEGDNLL  
IIPNKA AVKVLAI FCDKVRHVGPGENVRVRLSGVEEDDILSGFVLCVAKPIHAVTEFVAQLQILEL  
LDNAIFTAGYKAVLHIHSVVEECEIVELMQQIDLKTKKPMKKKPLFVKNGAIVLCRVQVNNLICVEKFS  
DFAQLGRFTLRTEGKTVAVGKITALPTVADNA

# Protein No.: I-1214

**Protein name and Species:** FAS-associated factor 2 OS=Populus trichocarpa GN=POPTRDRAFT\_548279 PE=4 SV=1

**Accession:** [tr|B9GK93|B9GK93\\_POPTR](#)

**Unused ProtScore:** 2

**Seq Cov %:** 6.3

**ITRAQ Changed Ratio:**

**117: 115=E3TL: D3TL=0.48**

**116: 114=E5TL: D5TL=1.01**

**Annotated typical Precursor MS Region:**

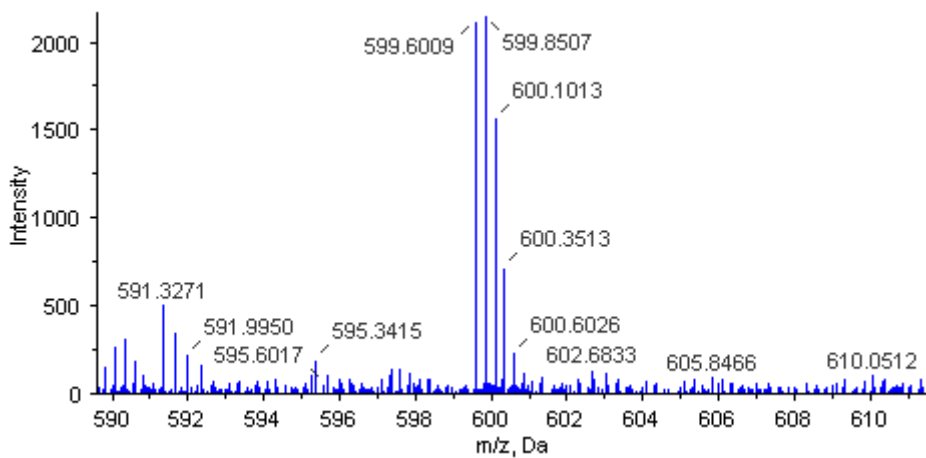

## Sequence Coverage and Matched peptides: in different color

MVDVADKLACFRAITGLESDLCTEILQAHNWDLELAISSFTSNHSDNHPFSSSYTATDTTATAVDPSN  
ATIHRSDSTSIVPAGAPPPGLAWKIVTLPISVISGSLGLISGAVGFGLWAAGGVLSYSLGFIGLGSNSG  
RGGDSSAQLVTVSAASREAMEFVAQFERDYGSGSSTRPNFVSEGFMDALTRSNTFKLLFVYLHSPDHL  
DTPAFCEGTLCEVLSAFVNENFVAWGGSIKRGSEGFKMSNSLKASRFPFCVVMSSTNQRIVLLQHVEG  
PKSPEEMLVILQRVLEQSAPVLVTARLEAEERTTNMRLREEQDAAYRAALEADQARERQQREEQERLER  
EAAEAERKRREEEEARDRAAASEAAENEAAALARMRQEKALSLGAEPEKGPDVTQVLVRFPTGERKERRFH  
CAATIQSLYDYVDSLGLNVENYSLVSNFPRVVYGTDKVSLSLKEAGLHPQASLFVELN

# Protein No.: I-1225

## Protein name and Species:

carboxymethylenebutenolidase, putative OS=Vitis vinifera

GN=VITISV\_041925 PE=4 SV=1

Accession: [tr|A5AEX6|A5AEX6\\_VITVI](#)

Unused ProtScore: 2

Seq Cov %: 3.7

## ITRAQ Changed Ratio:

117: 115=E3TL: D3TL=0.66

116: 114=E5TL: D5TL=0.63

## Annotated typical Precursor MS Region:

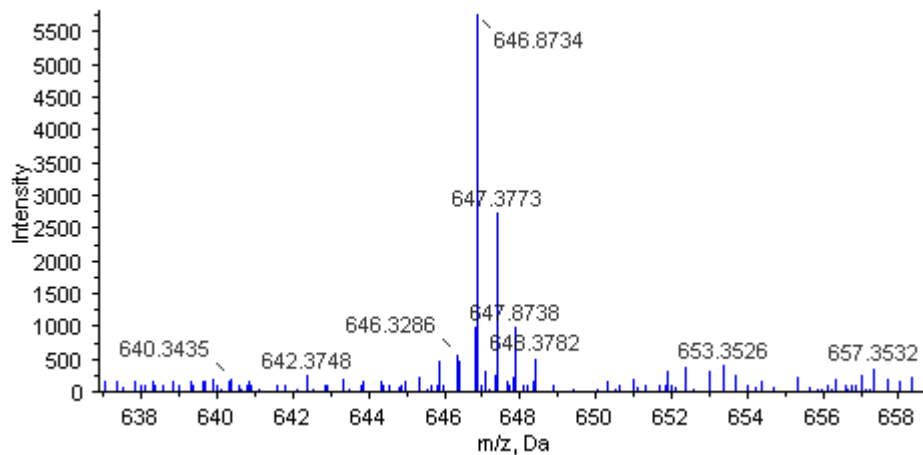

## Sequence Coverage and Matched peptides: in different color

MAESASSPFKKIQIQR**DDTTFDAYVVGK**EDAPGI VVVQEWVGVDYEVKNHALK**ISQLDPGFKALIPDLY**  
**R**GKVGGLDVAEAQHLM DGLDWQGA VKD ICASVNW LKANGS QKVGVTGYCMGGALS IASSVLLPEVDAVVA  
FYGVPSELADPAKAKAPVQAHFGE LDSFVGFSDV TAAKAL EEK LKASGVPYEVHIYPGN GHAFMNRSP  
EGIQRRKGMGPDEDED AVGLAWSRFRAWMSCYLSP

# Protein No.: I-1228

Protein name and Species:

**Prefoldin**            **subuni**            **OS=Populus**            **trichocarpa**

**GN=POPTRDRAFT\_714512 PE=4 SV=1**

Accession: **tr|B9H401|B9H401\_POPTR**

Unused ProtScore: **2**

Seq Cov %: **16.8**

ITRAQ Changed Ratio:

**117: 115=E3TL: D3TL=0.61**

**116: 114=E5TL: D5TL=0.52**

Annotated typical Precursor MS Region:

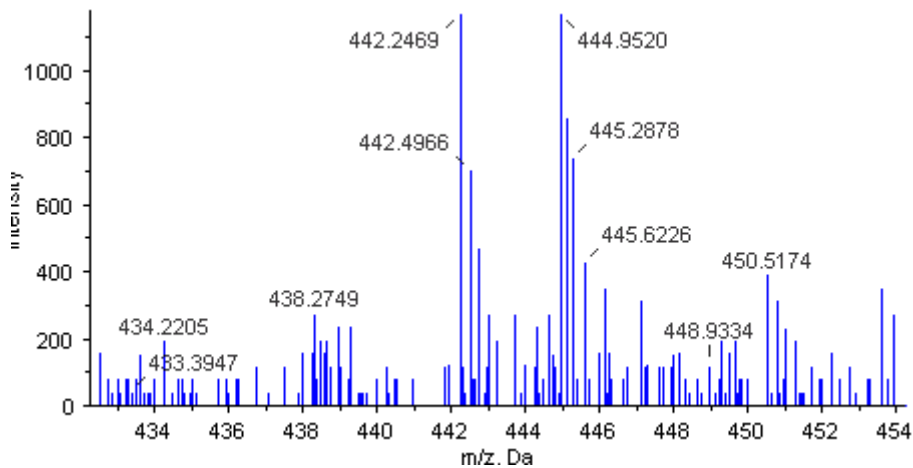

Sequence Coverage and Matched peptides: in **different color**

AIRELQRDLENKANDLSKLR**DI**AKNHQVRKK**Y**TIQLGENELV**LK**ELDLLNEGANVYK**LIGPVLVK**QDL  
AEANANVSKRIEYISAELKRL**LDGTLQDLEEK**QNSKKDAIFKLLQQR**I**QSFQAGKAKA



# Protein No.: I-1231

**Protein name and Species:**

**60S ribosomal protein L14-2-like [Vitis vinifera] OS=Vitis  
vinifera GN=VIT\_05s0049g01310 PE=4 SV=1**

**Accession: tr|D7SZI9|D7SZI9\_VITVI**

**Unused ProtScore: 2**

**Seq Cov %: 8.2**

**ITRAQ Changed Ratio:**

**117: 115=E3TL: D3TL=2.29**

**116: 114=E5TL: D5TL=3.08**

**Annotated typical Precursor MS Region:**

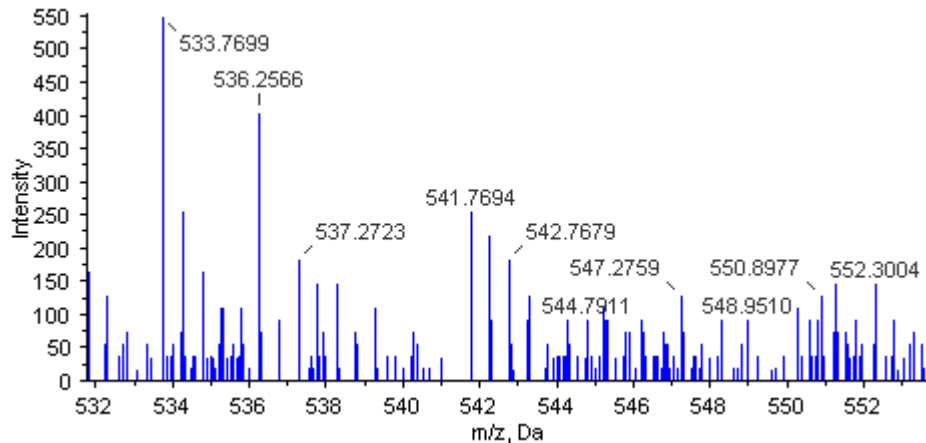

**Sequence Coverage and Matched peptides: in different color**

MEFFNLYNLHGKVLNQIRLISGFNSPKKAQRASKPNTIVTQRSRTQIGPKRTIKKPRKTLSPVSPSTP  
LASSIFPLPAVSRALANMPFKRYVEVGRVALVNYGKDYGRLLVVIDVIDQNRALVDAPDMVRQMNFKR  
LSLTDIKIDIKRVPKTKTLIEAMTAADVKNKWENSSWGRKLIQKRRASLNDPDRFKIMLAKIKRGGVI  
RQELAKLKKQTAS

## Protein No.: I-1236

### Protein name and Species:

**chitinase**                      **1**                      **OS=Populus**                      **trichocarpa**

**GN=POPTRDRAFT\_557015 PE=4 SV=1**

**Accession: tr|B9HQZ2|B9HQZ2\_POPTR**

**Unused ProtScore: 2**

**Seq Cov %: 6**

### ITRAQ Changed Ratio:

**117: 115=E3TL: D3TL=0.52**

**116: 114=E5TL: D5TL=0.37**

### Annotated typical Precursor MS Region:

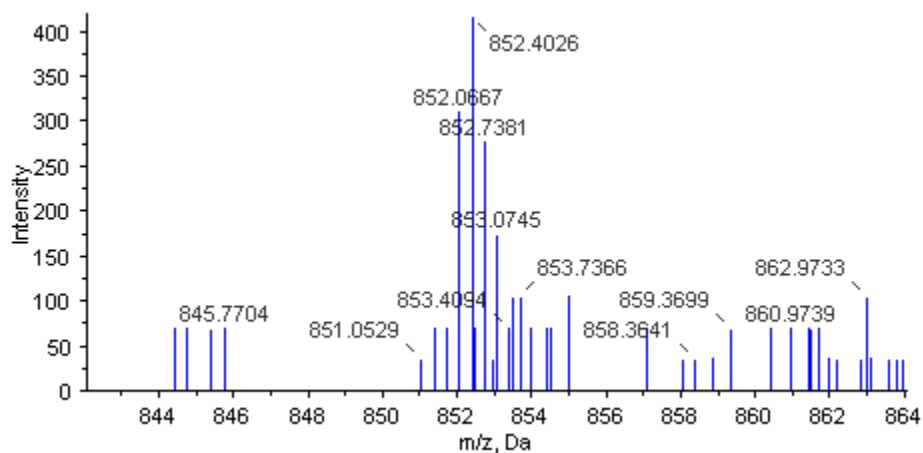

## Sequence Coverage and Matched peptides: in different color

MKMWVFTVFSLLLLLLLLGGSAEQCGSQAGGALCFGGLCCSQFGWCGSTNDYCGNGCQSQC GGASGGDLG  
SIIISSEKFDEMLKHRNDGGCPGKGFYTYSAFISAANAFPGFGTTGDADTRKREIAAFLGQTSHETTGGW  
QTAPDGPYAWGYCFVKEQNPGSYCSPSSSTYPCADGKQYYGRGPVQLSWNYNYGQCGKAIGVDLLNNPDL  
VATDPVISFKTAIWFWMTAQSPKPSCHSVITGNWSPSGADSAAGRVPGYGVLTNIINGGLECGMGWKQQ  
VEDRIGFYKRYCDLLGVGYGNLDCYNQKSFANGLLDMVDSM

# Protein No.: I-1247

**Protein name and Species:**

**ADP-ribosylation factor, putative OS=Ricinus communis**

**GN=RCOM\_0060350 PE=3 SV=1**

**Accession: tr|B9SYE9|B9SYE9\_RICCO**

**Unused ProtScore: 2**

**Seq Cov %: 8.2**

**ITRAQ Changed Ratio:**

**117: 115=E3TL: D3TL=0.34**

**116: 114=E5TL: D5TL=0.82**

**Annotated typical Precursor MS Region:**

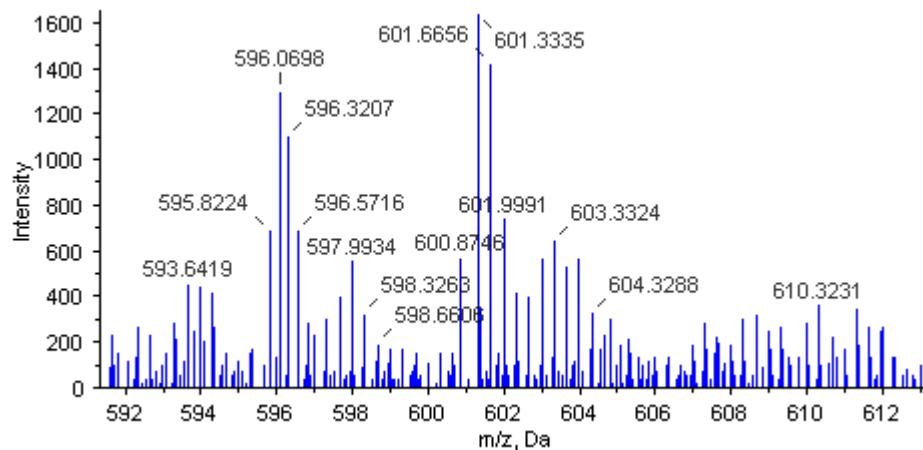

**Sequence Coverage and Matched peptides: in different color**

MGLLD~~SL~~LNWLR~~SLFFKQEMELSLVGLQNAGK~~TSLVNAVATGGYSEDMIPTVGFNMRKVTKGNVTIKLW  
DLGGQRRFRMTWERYCRGVSAILYVVDAADRDSVPIARSELHDLVVK~~PSLSGIPLLVLGNKIDKSEALS~~  
~~KQALVDQLGLESITDRE~~VCCY~~MISCK~~DSVNIDVV~~IDLKHSKTAK~~

# Protein No.: I-1275

**Protein name and Species:**

**V-type proton ATPase subunit F OS=Ricinus communis**

**GN=RCOM\_1381970 PE=3 SV=1**

**Accession: tr|B9S7V3|B9S7V3\_RICCO**

**Unused ProtScore: 2**

**Seq Cov %: 9.2**

**ITRAQ Changed Ratio:**

**117: 115=E3TL: D3TL=0.61**

**116: 114=E5TL: D5TL=1.16**

**Annotated typical Precursor MS Region:**

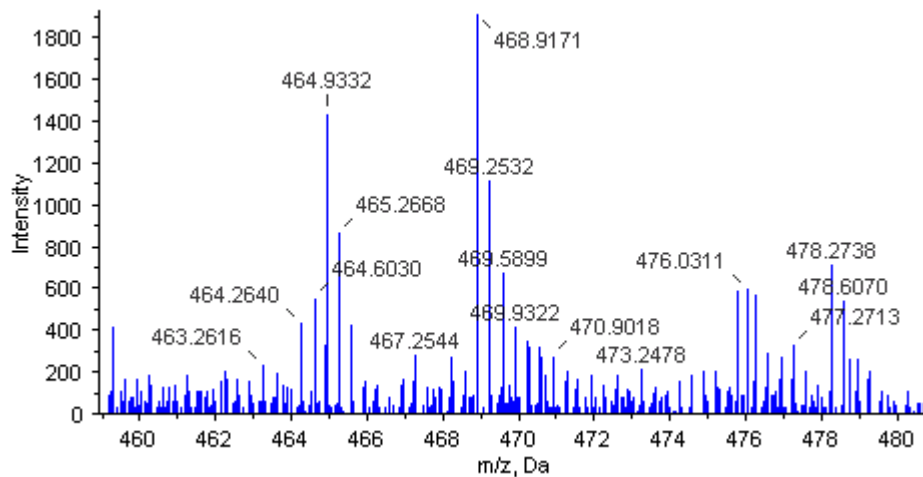

**Sequence Coverage and Matched peptides: in different color**

MANRNQIRTNNSALIAMIAD~~ED~~TVVGFLLAGVGNVDLR~~R~~RKTNYLLVDSKTTVKQIE~~DAFK~~DFTTREDIA  
IVMISQYVANMIR~~FV~~VDSYNKPVP~~AILLE~~IPSK~~D~~HDPYDPSQDSVLSRVK~~HLFSAESV~~ASGR~~R~~

## Protein No.: I-1278

**Protein name and Species:**

nuclear transport factor 2 isoform 1 OS=Populus trichocarpa

GN=POPTRDRAFT\_548036 PE=2 SV=1

**Accession:** tr|A9PBT2|A9PBT2\_POPTR

**Unused ProtScore:** 2

**Seq Cov %:** 27.6

**ITRAQ Changed Ratio:**

**117: 115=E3TL: D3TL=0.39**

**116: 114=E5TL: D5TL=0.95**

**Annotated typical Precursor MS Region:**

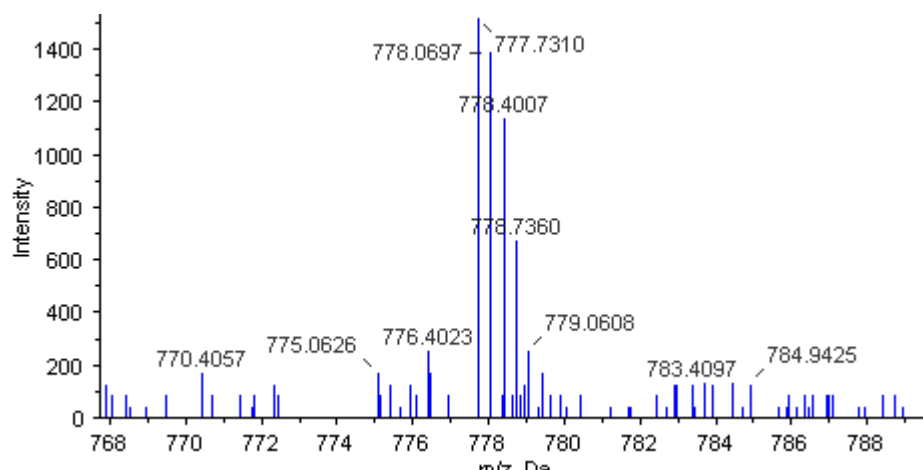

**Sequence Coverage and Matched peptides:** in different color

MDPDQVAKAFVEHYYSTFDANRAGLANLYQDGSMLTFEGQKTQGSQNIVAKLIALPFQQCKHLITTVDC  
QPSGPAGGMLVVFVSGNLQLAGEQHALKFSQMFHLMPTPQGSFYVFNDIFRLNYA

# Protein No.: I-1281

**Protein name and Species:**

**nuclear transport factor, putative OS=Populus trichocarpa PE=4**

**SV=1**

**Accession: tr|A9PE14|A9PE14\_POPTR**

**Unused ProtScore: 2**

**Seq Cov %: 29.8**

**ITRAQ Changed Ratio:**

**117: 115=E3TL: D3TL=0.51**

**116: 114=E5TL: D5TL=1.43**

**Annotated typical Precursor MS Region:**

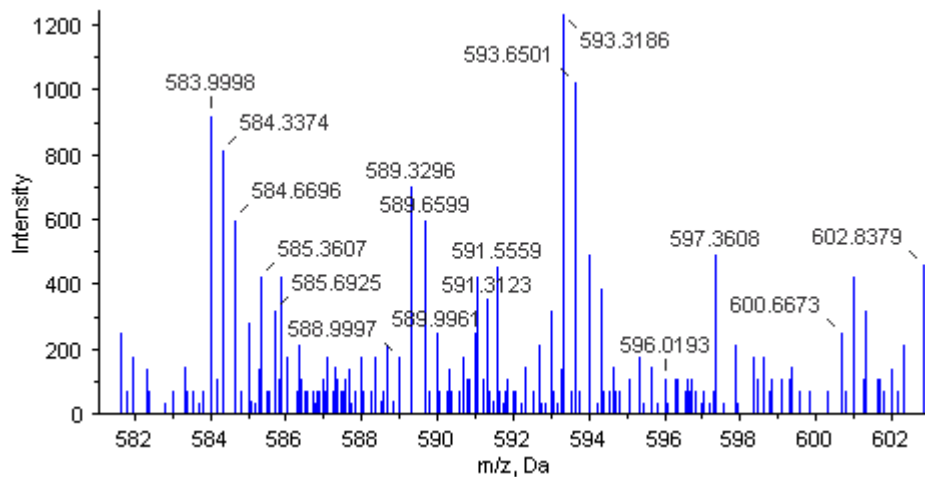

**Sequence Coverage and Matched peptides: in different color**

MDPDTVAKAFVEHYYNMFD SNRAGLANLYQDASMLTFEGQKTQGSQNIVAKLTALPFHQCKHHITTVDC  
QPSPGAGGMLVVFVSGNLQLAGEQHALKFSQGSYYVYNDIFRLNYA

# Protein No.: I-1318

**Protein name and Species:**

**Putative uncharacterized protein OS=Vitis vinifera**

**GN=VIT\_01s0011g00830 PE=4 SV=1**

**Accession: tr|F6HF70|F6HF70\_VITVI**

**Unused ProtScore: 2**

**Seq Cov %: 8.9**

**ITRAQ Changed Ratio:**

**117: 115=E3TL: D3TL=0.52**

**116: 114=E5TL: D5TL=0.12**

**Annotated typical Precursor MS Region:**

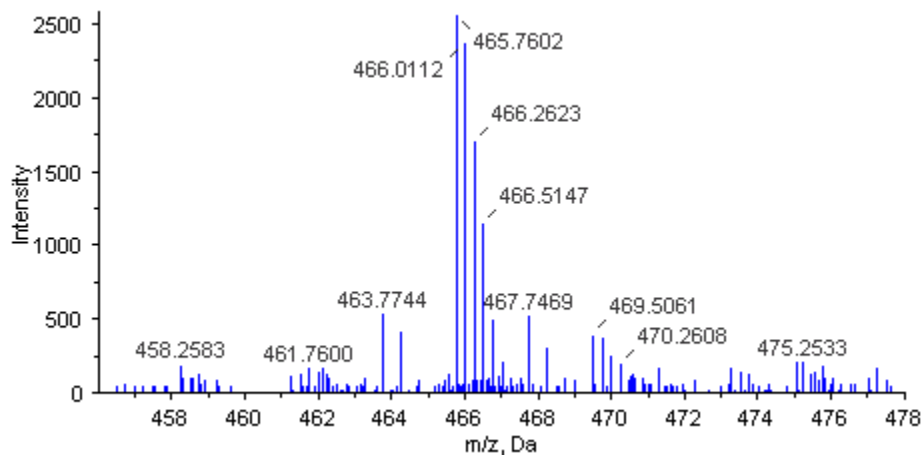

**Sequence Coverage and Matched peptides: in different color**

MMNVKQHGHDTVKEASPPHISTGEGGVKASSPLFDPSLCKTSSSEFLSFQTSMDPTSHHRPGSHPQKHHQ  
PSSSELLSSAKVVAEAAQASFHHESEKVDKSRVAGAAADILGAASHYGLLEEKSFQKYEKAETYLHQY  
QSSHSTTTTINSGHSTTNTTETHSSSHSGGGDSHSGGGYGDYDKMAEGFLKKY



# Protein No.: I-1320

**Protein name and Species:**

**heat shock factor-binding protein-like OS=Ricinus communis**

**GN=RCOM\_1439840 PE=4 SV=1**

**Accession: tr|B9T0W0|B9T0W0\_RICCO**

**Unused ProtScore: 2**

**Seq Cov %: 16.7**

**ITRAQ Changed Ratio:**

**117: 115=E3TL: D3TL=2.07**

**116: 114=E5TL: D5TL=1.03**

**Annotated typical Precursor MS Region:**

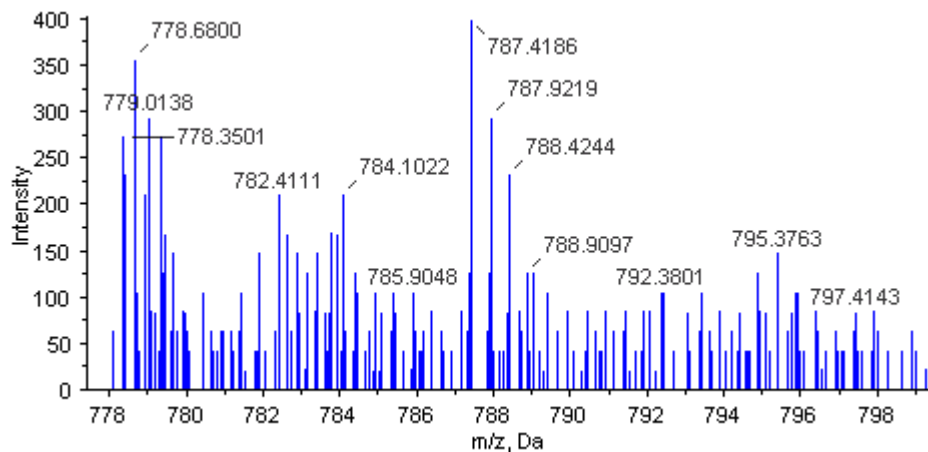

**Sequence Coverage and Matched peptides: in different color**

MDGHDSEDPKQSTADMTVFVQNLQQMMGTRINDLEQSINDLRSEMGVEGSPSPLCQSKQKSGEENQDD  
ALA

# Protein No.: I-1336

**Protein name and Species:**

**Calcium lipid binding protein, putative OS=Ricinus communis**

**GN=RCOM\_0491050 PE=4 SV=1**

**Accession: tr|B9SXV3|B9SXV3\_RICCO**

**Unused ProtScore: 1.95**

**Seq Cov %: 11.3**

**ITRAQ Changed Ratio:**

**117: 115=E3TL: D3TL=1.67**

**116: 114=E5TL: D5TL=4.33**

**Annotated typical Precursor MS Region:**

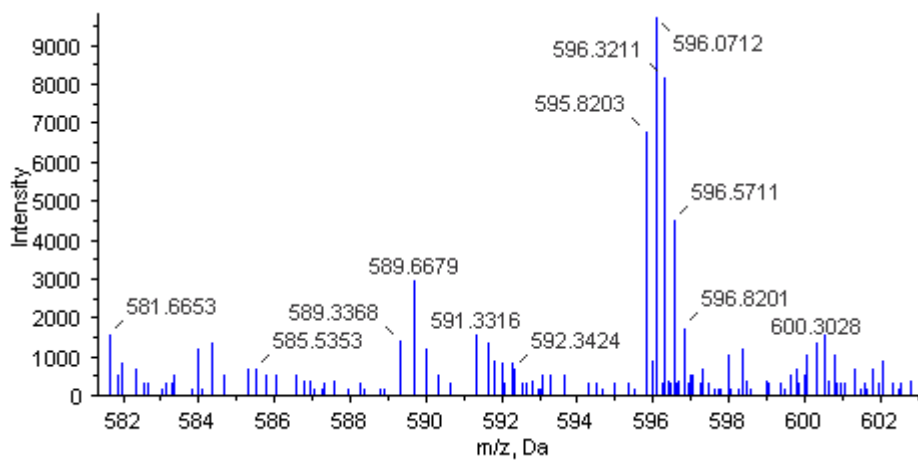

## Sequence Coverage and Matched peptides: in different color

MGFFSTIFGFCGFGVGISMGLVIGYYLFIFFFQPTDVKEPEIRPLVEEDSETLQRMLEIPLWVKNPDYD  
RIDWLNKFL EYMWPYLDKAICKTAKNIATPIIAEQIPKYKIDSVEFETLTLGTLPPPTFSGMK**VYVTDEK**  
ELILEPCLK**WAGNPNTVAVK**AFGLK**ATAQVVDLQVFALPR**ITLKPLVPSFPCFATIYVSLMEKPHVDF  
GLK**LSGADIMSIPGLYRLVQEIIK**DQVANMYLWPKTLEVQVMDPAKALKRPVGILNVKVVRAMKLLKK**D**  
**LLGASDPYVKIKL****TEDKLP****SK**KTTVKHKNLNPEWNEEFNLVVKDPETQAVEFHVYDWEQVGKHK**MGMN**  
**VVPLK**ELSP EEPKLT**TLDLLK**NMDLNDSQNEKSRGQWRLH**VEVSTSSR**MGLLHPK**ESLGYVDISLADV**  
**VSNK**RINEK**FHLIDSKNGR**IQIELQWRTSS

# Protein No.: I-1337

**Protein name and Species:**

heat shock 70 kDa protein, mitochondrial-like [Vitis vinifera]

OS=Vitis vinifera GN=VIT\_00s0415g00030 PE=3 SV=1

**Accession:** [tr|F6HCT7|F6HCT7\\_VITVI](#)

**Unused ProtScore:** 1.94

**Seq Cov %:** 4.5

**ITRAQ Changed Ratio:**

**117: 115=E3TL: D3TL=1.96**

**116: 114=E5TL: D5TL=1.54**

**Annotated typical Precursor MS Region:**

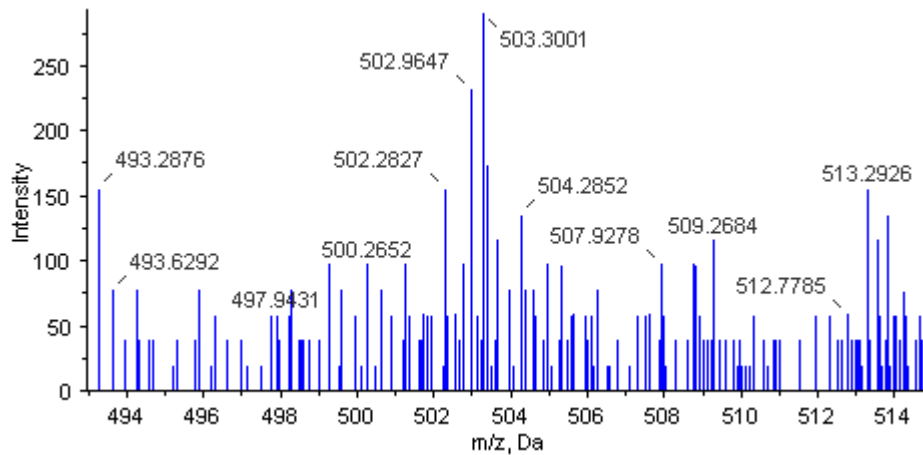

## Sequence Coverage and Matched peptides: in different color

MATSVLLRCLKRRDLQSSSLAAYRSLTGNAKTSVSTSPAVQKWASYIRP**FSSK**PAGNDVIGIDLGTTNS  
CVSVMEGKNAKVIENSEGARTTPSVVAINQKGELIV**GTPAK**RQAVTNPTNTVFGTKRLIGRRFDDPQTQ  
KEMKMVPFKIVRAPNGDAWVEANGQQYSPSQIGAFVLT~~TKM~~KETAEAYLGKTVSKAVITVPAYFNDAQRQ  
ATK**DAGRIAGLDVQR**IINEPTAAALS~~YGLN~~KEGLIAVFDLGGGTFDVSILEISNGVFEVKATNGDTFL  
GGEDFDNALLEFLVSEFKRTEGIDLTKDRLALQRLREAAEKAKIELSSTSQT~~DINLP~~FITADASGAKHL  
NITLTRSKFEALVDKLIERTRNPCSKCLKDAGISVKEVDEVLLVGGMTRV**PKVQEVVAEIFGK**SPSK**GV**  
**NPDEAVAMGAAIQGGILR**GDVKELLLLDDVTPLSLGIETLGGIFTRLINR**NTTIPTK**KSQVFSTAADNQT  
QVGKVLQGEREMATDNKLLGEFELV**GIPPAPR**GMPQIEVTFDIDANGIVTVSAKDKSTGKEQQITIRS  
SGGLSDDEIEKMKVKEAELHAQRDQERK**ALIDIR**NSADTTIYSIEKSLDEYRDKIPAEVAKEIEAAVADL  
RDAMQKENIDEIKAKLDAANKAVSKI~~GQH~~MSGGSGGAASGGSEGSTSSDQTPEAEYEQAKK

# Protein No.: I-1341

**Protein name and Species:**

**Predicted protein OS=Populus trichocarpa**

**GN=POPTRDRAFT\_1115857 PE=4 SV=1**

**Accession: tr|B9N560|B9N560\_POPTR**

**Unused ProtScore: 1.92**

**Seq Cov %: 11.2**

**ITRAQ Changed Ratio:**

**117: 115=E3TL: D3TL=0.62**

**116: 114=E5TL: D5TL=0.58**

**Annotated typical Precursor MS Region:**

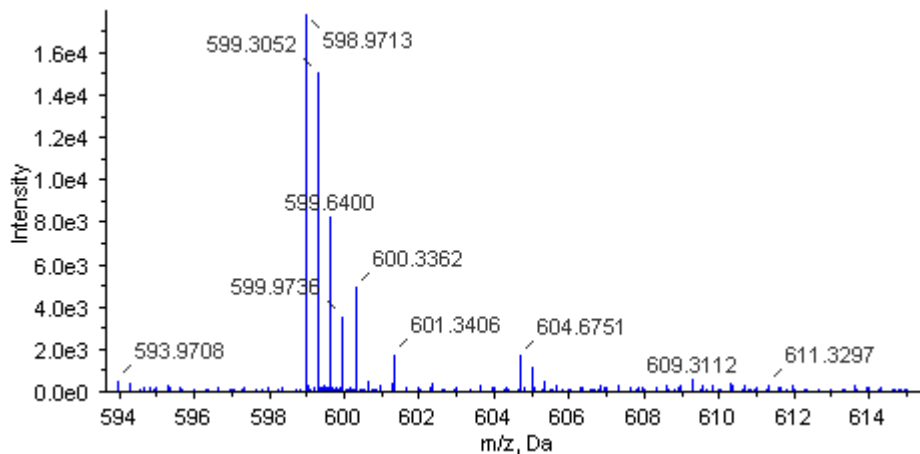

**Sequence Coverage and Matched peptides: in different color**

MNPQQQQQQQQQQQNPVDPDQPLLPTIKIHHPSPPRHPHPPSATPTLTPTRRK**IGVAVDLSDESAY**  
**AVR**WSVHHYIRPGDSVILLHVSPTSVLGADWGPLPLSTPTQSQLDLLNNSKFNSEIDSKTKNENSEK  
PQPRQEDDFDAFTASKAAD IARPLK**EAQIPYKIHI**VKDHDMDKERLCLEIER**LGLSAVIMGSRGF**GAAIR  
GSDER**LGSVSDYCVHHCFC**PVVVVRYPEDKDCGRD

# Protein No.: I-1346

**Protein name and Species:**

**Serine/threonine-protein kinase, putative OS=Ricinus communis**

**GN=RCOM\_1590280 PE=4 SV=1**

**Accession: tr|B9R7B8|B9R7B8\_RICCO**

**Unused ProtScore: 1.91**

**Seq Cov %: 5.7**

**ITRAQ Changed Ratio:**

**117: 115=E3TL: D3TL=1.71**

**116: 114=E5TL: D5TL=3.28**

**Annotated typical Precursor MS Region:**

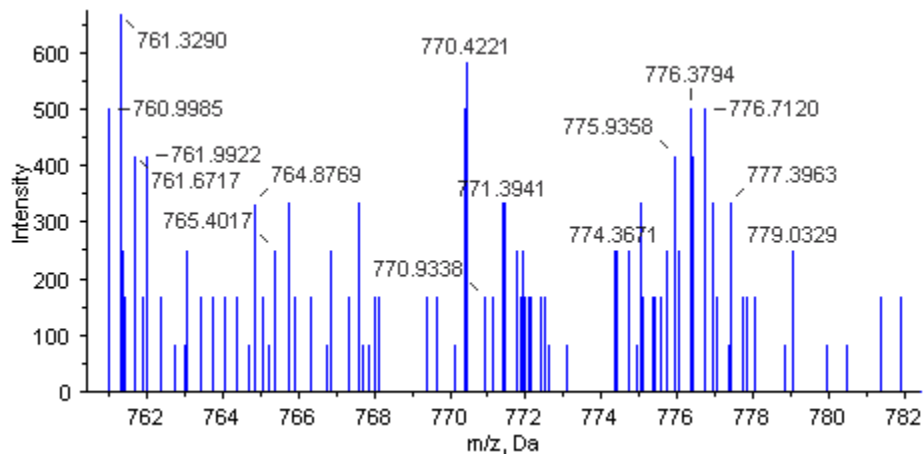

## Sequence Coverage and Matched peptides: in different color

MDGGDGTVRLGALNLRPDRSGFDSPDVSVSSPVTRQKAAAAKQFIENHYKNYLQGLQDRKDRRQALQR  
RAQEARISNEEQEEMMRNLERRETEYMRLQRRKIGIDDFEQLTVIGKGAFGEVRLCRAKSTGEIFAMKK  
LKKSEMLSRGQVEHVRSERNLLAEVDSRCIVKLFYSFQSDFLYLIMEYLPGGDIMTLLMREDILSEDV  
ARFYIAESILAIQSIHQHSYVHRDIKPDNLILDKNHGLKLSDFGLCKPLDDKYSSILLENEDISQEGTN  
EAGGHSGSEAPWSMPKEVLQQWKRNRALAYSTVGTLDYMAPEVLLKKGYGMECDWWSLGAILYEMLLG  
YPPFCSDDPRIITCRKIINWKTCLKFPDEPKISNEAKDLICHLLCDVETRLGTRGVDELKAHPWFRCTQW  
DMLYEMEAAYKPVVNGDLDTQNFEEKFPDLEGPPSAIPRVGPWRKMLTSKDTNFIGFTFKKSDVINSMES  
SGTYAKSNASSKAPSLISLLGRIDLQETAEELEGEHTLQS



# Protein No.: I-1348

## Protein name and Species:

Putative uncharacterized protein OS=Ricinus communis

GN=RCOM\_0632890 PE=4 SV=1

Accession: [tr|B9S119|B9S119\\_RICCO](#)

Unused ProtScore: 1.89

Seq Cov %: 10.3

## ITRAQ Changed Ratio:

117: 115=E3TL: D3TL=0.33

116: 114=E5TL: D5TL=1.16

## Annotated typical Precursor MS Region:

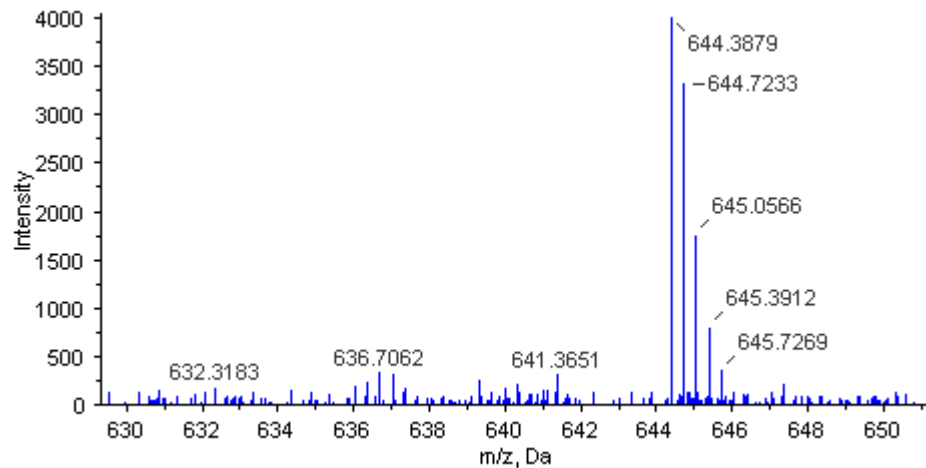

## Sequence Coverage and Matched peptides: in different color

MASQRIANHRDEAEIYLGESLCKQKSIELLEIRLPKGLLEPLDDIVEVGYNRRTGFVWLKQKNSKNHRF  
REIGRNVNYDTEVTAFVEDRMRKRLTGVKSKELLIWVTISDIYVDHNDNSKITFGNPSGISRTFPVSAF  
QLQEEKK

# Protein No.: I-1353

**Protein name and Species:**

**chitinase, class I (Fragment) OS=Hevea brasiliensis GN=rq30**

**PE=2 SV=1**

**Accession: tr|Q949H3|Q949H3\_HEVBR**

**Unused ProtScore: 1.87**

**Seq Cov %: 7.1**

**ITRAQ Changed Ratio:**

**117: 115=E3TL: D3TL=0.45**

**116: 114=E5TL: D5TL=0.51**

**Annotated typical Precursor MS Region:**

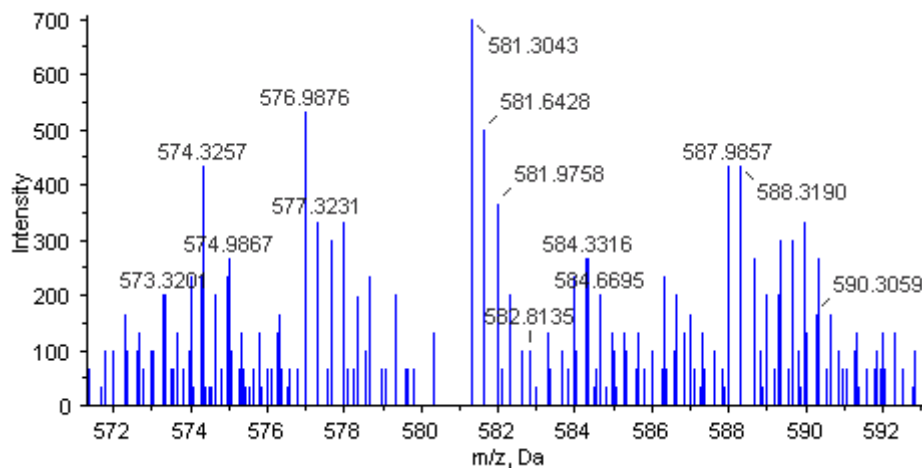

## Sequence Coverage and Matched peptides: in different color

EQCGRQAGGALCPGGLCCSQYGWCANTPEYCGSGCQSQCDGGGGGEDGGIDLGSIIISRSTFEMLKHRN  
DAACPAKGFYTYDAFISAAKAFPAFGTTGDVDTCKREIAAFFGQTSHATTGGWPTAPDGPYAWGYCYKE  
ELNQASSYCSPPAYPCAPGKKYYGRGPIQLSWNYNYGQCGQALGLDLLNPNPDLVATDRVISFKAAIWF  
WMTPQFPKPSCHDVITGQWSPTGHDISAGRAPGYGVITNIINGGLECGRGWDARVEDRIGFYKRYCDMF  
AVGYGSNLD CYNQTPFGLG

# Protein No.: I-1355

**Protein name and Species:**

**GTP-binding protein OS=Populus trichocarpa**

**GN=POPTRDRAFT\_1073333 PE=3 SV=1**

**Accession: [tr|B9H023|B9H023\\_POPTR](#)**

**Unused ProtScore: 1.86**

**Seq Cov %: 22**

**ITRAQ Changed Ratio:**

**117: 115=E3TL: D3TL=2.75**

**116: 114=E5TL: D5TL=0.78**

**Annotated typical Precursor MS Region:**

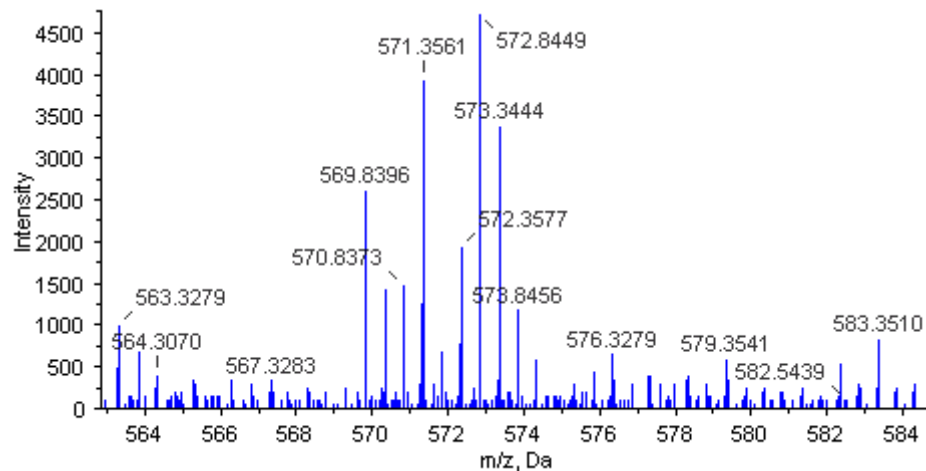

## Sequence Coverage and Matched peptides: in different color

MSNSSENEVESLPQSIEEKHQELVVSHVPIVSSFNERIR**PLLD**AVDKLRHLQ**VMKEGIQLPTIVV**VGDO  
**SSGKSSVLES**LAGISLPRGQGICTRVPLIMR**LQHHTAPEPEFSLEFNGK**TVPTSEAK**IANAISLATDEI**  
**AGNAKGISNTPLTLVVK**KNGVPDLTMVDLPGITRVPVHGQPENIYEQIADIIMEYIRPDESIILNVLSA  
TVDFTTCESIRMSQKVDKNGERTLAVVTKADR**APEGLLEKVTADDVNIGLGYVCVR**NRIGDESYYEARK  
EEADLFENHPLLKIDK**SMVGIPVLAQKLVQIQATI**IARCLPEIVRKINEK**LNASISELNR**MPK**TLSSV**  
**GEAL**TFMS**IVGSAK**ESLNKIIVR**GEYDEYLEDKNMHCTAR**LVEMLNQYSGELHNCSENDLTGNFLMDE  
IQVLEEAKGIELPNFLPRTTFLSILQKKVEKVSHIPVAFVEKVWTYIEGVVISVLMHHSENYHQLQLST  
RRAGHSLIARMKEHSRNWVTEIVQMEKLTDYTSNPEYMNDWNKLMQQHDFTRNVLENGYVATFKIEGL  
GVVPIAGLRGYEQHVLLQAFDLKMRMTAYWKIVLRRLLVDFMALHLQF**CARNLVNK**EMEEEIVQELVGRH  
DGAIERMLEESP**AVAAK**REKLNVS**IKLLR**ESNN**VLGNIMDK**IASNI

# Protein No.: I-1387

**Protein name and Species:**

**ubiquitin 11 OS=Medicago truncatula PE=2 SV=1**

**Accession: tr|B7FLK9|B7FLK9\_MEDTR**

**Unused ProtScore: 1.77**

**Seq Cov %: 77.3**

**ITRAQ Changed Ratio:**

**117: 115=E3TL: D3TL=0.24**

**116: 114=E5TL: D5TL=0.82**

**Annotated typical Precursor MS Region:**

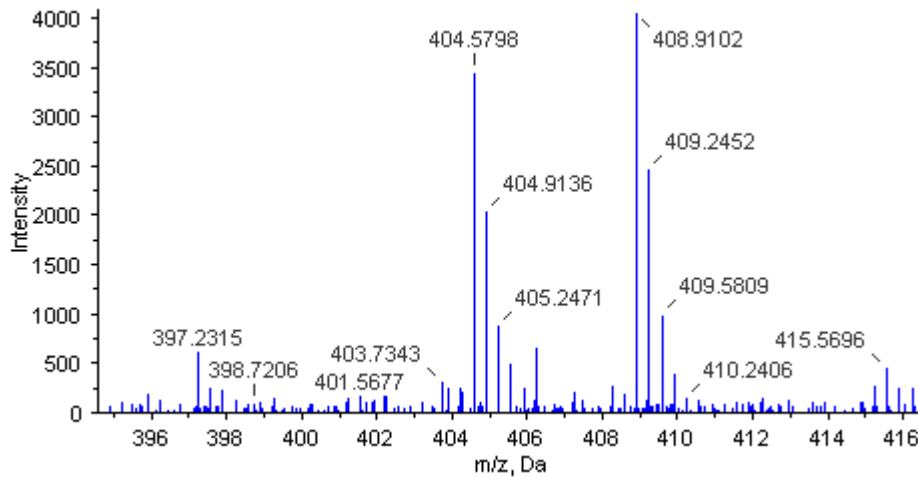

**Sequence Coverage and Matched peptides: in different color**

**MQIFVKT**LTGK**TITLEVESSDTIDNVKAKIQNKEGIPPDQQR**LIFAGKQLEDGRTLADYNIQK**ESTLHL**  
**VLRLRGGMQIFVKT**LTGK**TITLEVESSDTIDNVKAKIQDKEGIPPDQQR**LIFAGKQLEDGRTLADYNIQ  
**KESTLHLVLRLRGGMQIFVKT**LTGK**TITLEVESSDTIDNVKAKIQDKEGIPPDQQR**LIFAGKQLEDGRT  
**LADYNIQKESTLHLVLRLRGGF**

# Protein No.: I-1404

**Protein name and Species:**

**Conserved hypothetical protein [Ricinus communis] OS=Ricinus  
communis GN=RCOM\_1445010 PE=4 SV=1**

**Accession: tr|B9RGW6|B9RGW6\_RICCO**

**Unused ProtScore: 1.7**

**Seq Cov %: 7**

**ITRAQ Changed Ratio:**

**117: 115=E3TL: D3TL=2.94**

**116: 114=E5TL: D5TL=3.98**

**Annotated typical Precursor MS Region:**

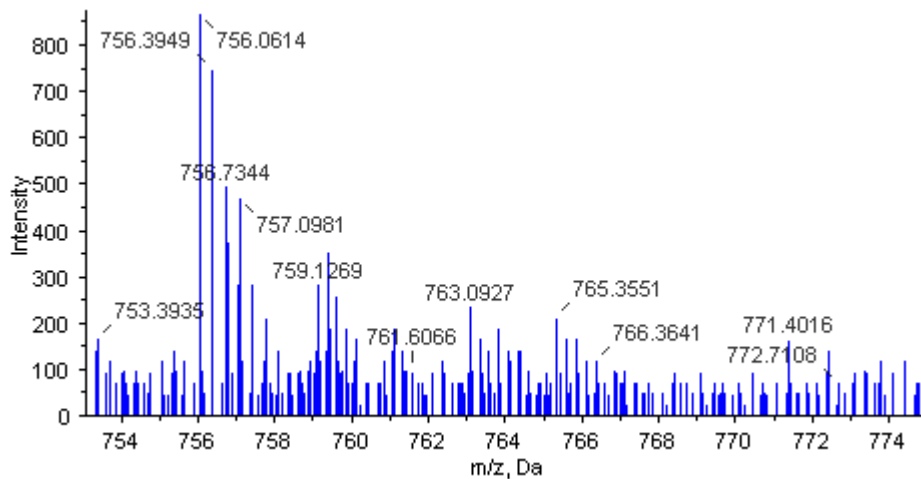



## Sequence Coverage and Matched peptides: in different color

MDKNTTKKKEVIRLERESVIPILKPKLVMTLANLIEHTSDRAEFLKLCCKRIEYTIRAWYLLQFEDLMQL  
YSLFDPVSGAQKLQQQLNSPEEIDVLEQNFLTYLFQVMDKSNFKIATEEEIEVAHSGQYLLNLPISVDE  
SKLDKEVLKKYFAAHPREDLPD**FVDK**YVIFRRGIGIDRTTDYFIMEKVDMLIARFWAYILRLTRVEKLL  
RRRSSMRCKKDPK**KNDEINSEADQNDLCVER**IRLENMELSVRNLLSSTTIQEPTFDRIIVVYRRASSKL  
KKERGIYVKHFKNIPMADMEIVLPEKK**NPGLTPMDWVK**FLGSAIVGLVALVSSLEMPKADLWVIFAVLS  
AVIGYFAKTYFTFQANLAAYQNLITQSMYDKQLDSGK**GTLHLHCDDVIQQEVK**EVIISFFILMEQGKAT  
MQDLDLR**CEELIQEEFGESC�FDVDDAVLK**LEK**LGIVAR**DTIGRYY**CVGLK**RANEIIGTTTEELVLKAK  
QGARRRTKSEVKPAERSKTQEQKILMHHIRRLQGQRRKAMGSLCSIISYLCDFFGGLNSNQIPGSAGVWS  
CYG

# Protein No.: I-1407

**Protein name and Species:**

**Predicted protein OS=Populus trichocarpa**

**GN=POPTRDRAFT\_806336 PE=3 SV=1**

**Accession: tr|B9I2G0|B9I2G0\_POPTR**

**Unused ProtScore: 1.69**

**Seq Cov %: 1.5**

**ITRAQ Changed Ratio:**

**117: 115=E3TL: D3TL=0.59**

**116: 114=E5TL: D5TL=0.56**

**Annotated typical Precursor MS Region:**

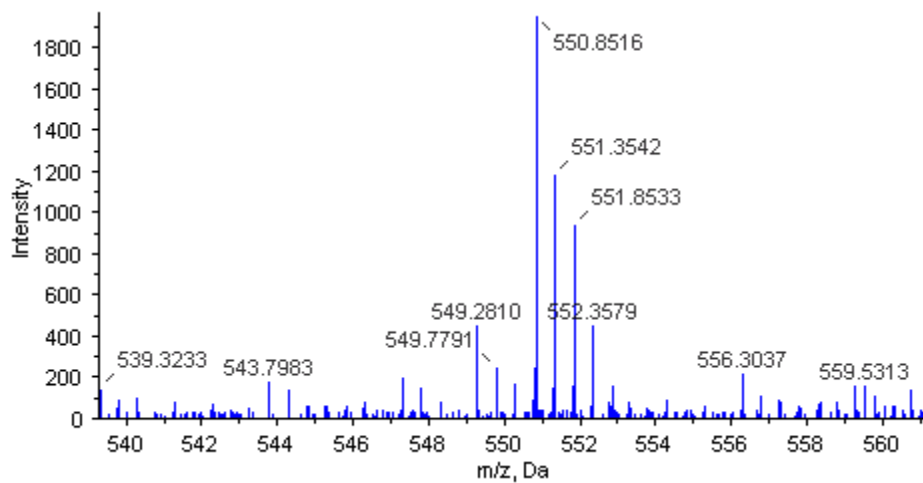

## Sequence Coverage and Matched peptides: in different color

MKNFLKKLHIMPNQSDAEGSNSSRGHKSSNESSSDNKFLHSRLQENKPFSGLSNWLSSVANRKKGARR  
DSVSSSTRDPDVEEEFQIQLALELSAR**EDPEAVQIEAVK**QISLGSCAPEHTLAELIAYRYWNYNALSVD  
DKVLDGFYDLYGIMTESTSDKMPSLVDLQATPVSGGVTEAVLVNRAADANLLKLEKKALEIAVKSRSE  
SQVFIGSALVRRRLAVLVSDYMGGAVGDPSNLSRAWRSLSYSLKANLGSMLPLGSLTIGLPRHR**ALMPK**  
VLADSVGIPCRLVKGHLYTGSDDVAMNFVKIDDGREYIVDLTADPGTLIPSDAAGSHIEYDDSFSSSP  
FSRDIDSYRIASSSSGHTSDSHEGASLTKLSKGEEESTISLNDFGKISIAEKVPVRELPGRPIYPSAHA  
RSPSWTEGVSSPSVRRMKVKDVSQYMIDAAKENPQLAQKLHDVLLLESGVVAPPNLFTEIYAEQLNASTA  
EATSPTEGK**DGHK**QRTEIRYVKDQDDLVPAR**FFPLLP**PNELPYKSSSPGNQPEQSKPSEFTPVKYVK**NV**  
**PVAAAAAAAAAVVASSMVVAAAK**SSTDSNLELPVAAAAATATAAAVMATTAAVNKQYVQGARS DGDADSA  
GYEPHSGDKGSGGRGKGERISDRLAVNVRSKSDAGLDDVAECEIPWEEITLGERIGLSYGEVYRGDW  
HGTEVAVKRFLDQDITGEALAEFRSEVRIMKRVRHPNVVLFMGAVTRAPNLSIVT**EFIPR**GSLYRLLHR  
PNNQLDDRRRLRMALDAARGMNYLHSCTPMIVHRDLKSPNLLVDKNWVVK**VCDFGLSR**IKNSTFLSSRS  
TAGTAEWMAPEVLRNEPSDEKCDVYSFGVILWELSTLQQPWGGMNPQVVGAVGFQHRSLDIPNDMDPA  
**IADIIRK**CWQTDPRRLRPTFAEIMAAKLLQKPIITGPQVPRPNAPLRS GH

# Protein No.: I-1418

## Protein name and Species:

aspartate-tRNA ligase, cytoplasmic-like OS=Populus  
trichocarpa GN=POPTRDRAFT\_652970 PE=3 SV=1

Accession: [tr|B9HBL6|B9HBL6\\_POPTR](#)

Unused ProtScore: 1.65

Seq Cov %: 7.5

## ITRAQ Changed Ratio:

117: 115=E3TL: D3TL=0.10

116: 114=E5TL: D5TL=0.21

## Annotated typical Precursor MS Region:

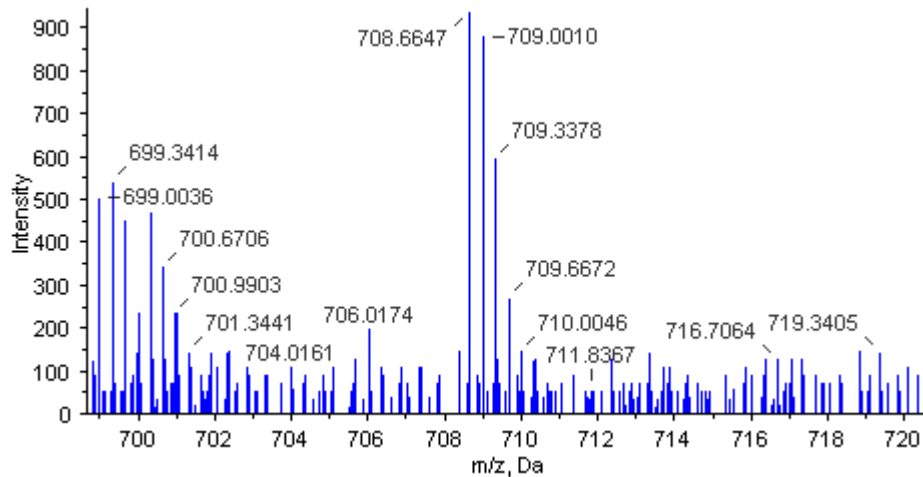

## Sequence Coverage and Matched peptides: in different color

MNPQNR AKKLQRRKQQSKRSYVAVRKPLWPAAAASSLSEEDPLAANYGNIPLQDLQSKVEADLKAWT  
QVGDLTHELKEKEVLIRGRAQTTRAVGKNMAFVVVREKGF TVQC VVTARPDV VSKQMVKFAAGLSRESI  
VDIHVVSVPSIAIKGTTQQVEIQVSKLYCVDKAMPTLPINIEDASRSEK EIEEAL EAGEQLVR VNQDT  
RLNYRVLD FRTSANQGI FRIQCQVCNIFRQFLLSEDFVEIHTPKLIAGSSEGGSAVFKLDYKGQAACLA  
QSPQLHKQMAICGDFGRVFEIGPVFRAEDSYTHRHLCEFTGLDVEMEIKQHYTEVMDIVDHLFVTMFDH  
LNKKCSKYLEAVGRQYPFEPLKYLPKTLRLRFEEGVQMLKEAGVEIDPYGDLNTESEK LGQLVLEKYG  
TEFYILHRYPLAVRPFYTMPCYDDPKYSNSFDV FIRGEEIISGAQRVHVPEFLVERAQACGIDVSTIST  
YIDSFYRGAPPHGGFGAGLERVVMLFCGLN NIRKTSLFRDPLRIAP

# Protein No.: I-1426

## Protein name and Species:

random slug protein 5 isoform 2 [Vitis vinifera] OS=Vitis  
vinifera GN=VIT\_18s0001g12420 PE=4 SV=1

Accession: [tr|F6H1I3|F6H1I3\\_VITVI](#)

Unused ProtScore: 1.61

Seq Cov %: 8.3

## ITRAQ Changed Ratio:

117: 115=E3TL: D3TL=0.17

116: 114=E5TL: D5TL=0.93

## Annotated typical Precursor MS Region:

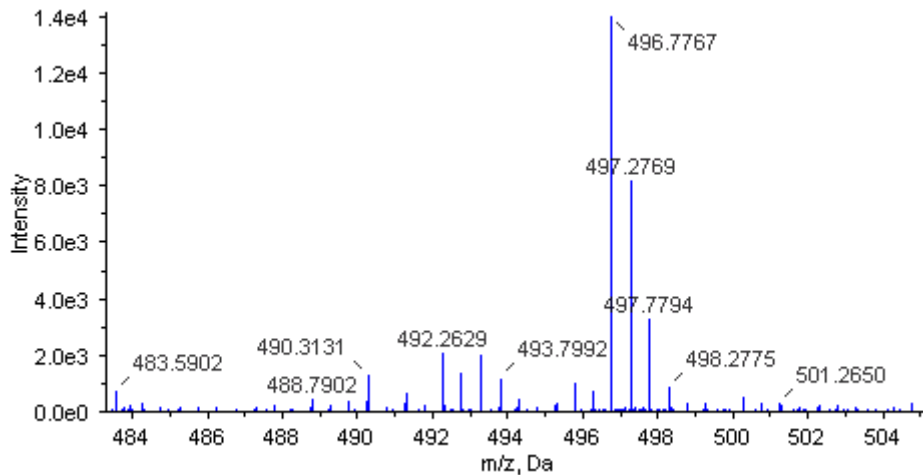

## Sequence Coverage and Matched peptides: in different color

MISEEVSFVFLDAHLSQQKYPTMLRLWGKSHHDQEKDLQKSDSKVHELK**AALGPLSGR**SLQYCNDACLKR  
YLEARNWNVDKSKKMLEETLTWRSTYKPEEIRWSDVATEGETGKVFRANFHDRHGR**TVLILR**PGKQNTT  
**ALDNQVR**HLLVYLLENAILNLPEDQEQMVWLIIDFTGMTFSNSVPIKTARDTIN**ILQNHYP**ERLFLAFLYS  
PPR**IFEAFWK**AVKYLLDAKTFQKV**FVYPK**DKNSVELM**SSYFDVENLP**DFGGKATMN**YDHEEFSRLMT**  
**QDDVK**SANLWGFQDKLQHVSNGHSVAEVSPEPACLAPAS

# Protein No.: I-1434

**Protein name and Species:**

**HMG-CoA synthase 2 OS=Hevea brasiliensis GN=HMGS2**

**PE=2 SV=1**

**Accession: tr|Q6QLW8|Q6QLW8\_HEVBR**

**Unused ProtScore: 1.58**

**Seq Cov %: 32.5**

**ITRAQ Changed Ratio:**

**117: 115=E3TL: D3TL=0.58**

**116: 114=E5TL: D5TL=0.73**

**Annotated typical Precursor MS Region:**

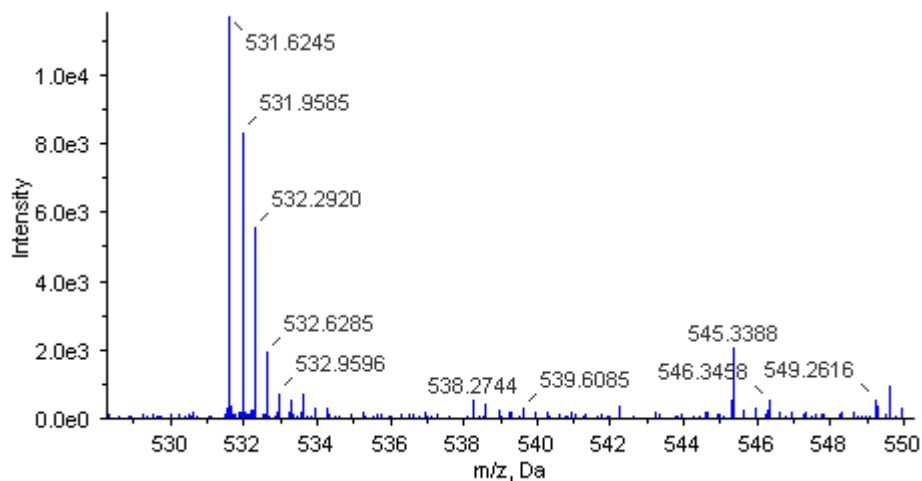



## Sequence Coverage and Matched peptides: in different color

MAKNVGI LAMDIYFPPTYVQQEAL EAH **DGASK** GKYTIGLGQDCMAFCTEVEDVISMSLTAVTSLLEK **YN**  
**IDPNQIGRLEVGETVIDK**SK**SIKTFLMQIFEK**FGNTDIEGVDSANACYGGTAALFNCVNWVESNSWDG  
RYGLVVCTDSAVYAEGPAR**PTGGAAAIAM**LIGPEAPIAF**ESK**FRGSHMSHAYDFYK**PNLASEYPPVDGK**  
**LSQTCYLMALDSCYKH****FCAK**YEKLEGGKQFSISDAEYFVFHSPYNKLVQKSFAR**LVFNDFVR****NASSIDDA**  
**AKEKLAPFSTLSGDESYQNRDLEKVSQQVAKPLYDAKVQPTTLIPK**QVGNMYTASLYAAFASLLHNK**HT**  
**ELAGKRVILFSYGSGLTATMFSLR****LHEGQHPF****SLSNIATVMNVAGK**LKTRHEFPPEK**FAVIMK**LMEHRY  
GAK**DFVTSK**DCSILAPGTYYLTEVD TMYRRFYAQ**KAVGDTVENGLLANGH**

# Protein No.: I-1437

## Protein name and Species:

methyl transferase [Populus tomentosa] OS=Populus  
trichocarpa GN=POPTRDRAFT\_1101018 PE=4 SV=1

Accession: [tr|B9IEB9|B9IEB9\\_POPTR](#)

Unused ProtScore: 1.57

Seq Cov %: 5.2

## ITRAQ Changed Ratio:

117: 115=E3TL: D3TL=3.73

116: 114=E5TL: D5TL=7.78

## Annotated typical Precursor MS Region:

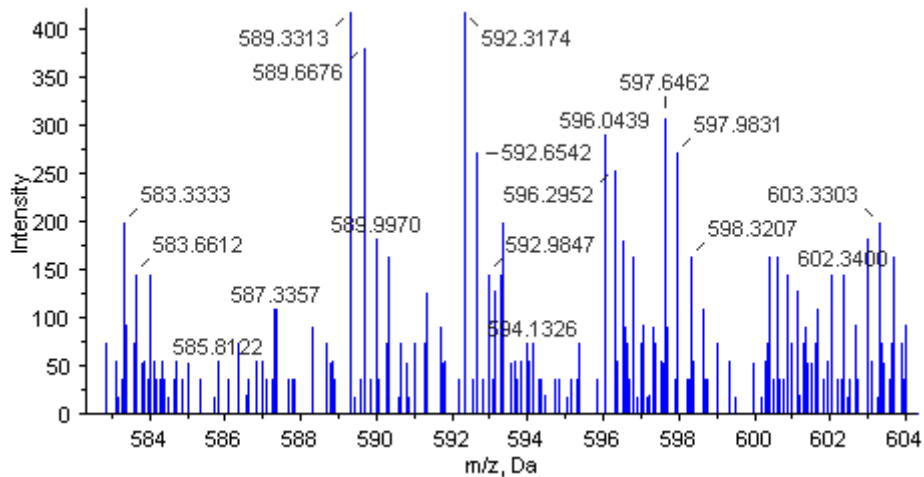

## Sequence Coverage and Matched peptides: in different color

MDNI**SDLSV**NAMML**DSKASELDK**EEERPEILSLLPPYEGKTVLELGAGIGRFTGELAQKAGQVVALDFIE  
SAIKKNENINGHYKNVKFMCADVTSPDLNISEGSVDLIFSNWLLMYLSDKEVENLVERMVKWKVDGFI  
FFRESCFHQSGDSKRKYNPHTHYREPRFYTKVFKECHTRDGSFELSLVGCK**CISAYVK**NKKNQNQAM  
KLDHLILWICWIWQKVSSYEDK**GFQRFLDNVQYK**SNGILR**YERVFGQGYVSTGGIETTK**EFVGKLDLKP  
GQKVLVCGGIGGGDFYMAENFDVEVVGIDLSINMISFALERA**IGLK**CSVEFEVADCTTK**TYPDNTFDV**  
**IYSRDTILHIQDK**PALFRSFFKWLKPGGKVLISDYCKCDGTPSPEFAEYIKQRGYDLHDVKAYGQMLRD  
AGFDEVVAEDRTDQFNKVLQRELNAIEKDKDEFIHDFSEGDYNDIVGGWKAKLIRSSSGEQRWGLFIAK  
KK

# Protein No.: I-1453

**Protein name and Species:**

**chitinase Class Ib, OS=Limonium bicolor PE=2 SV=1**

**Accession: tr|Q1W6C5|Q1W6C5\_9CARY**

**Unused ProtScore: 1.53**

**Seq Cov %: 5.9**

**ITRAQ Changed Ratio:**

**117: 115=E3TL: D3TL=0.64**

**116: 114=E5TL: D5TL=0.51**

**Annotated typical Precursor MS Region:**

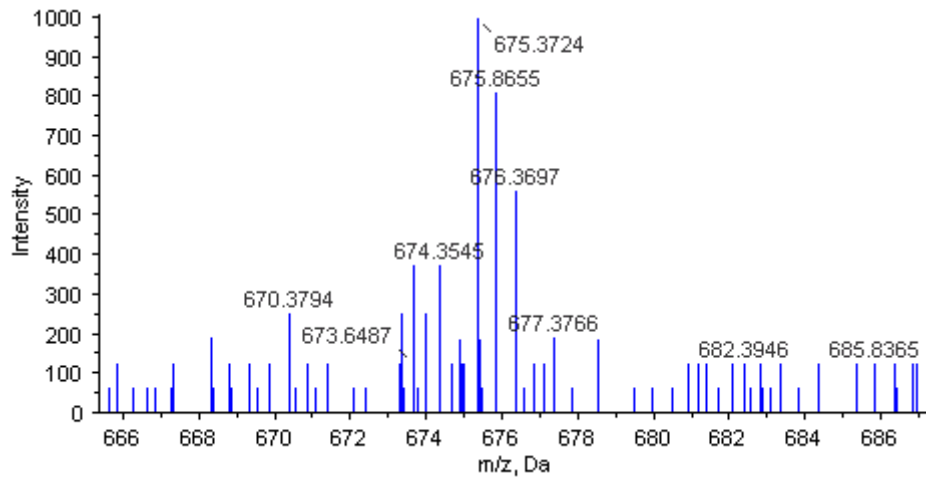

## Sequence Coverage and Matched peptides: in different color

MKTTLL**IL**TAAAL**P**FLLLLSFSSAEQCGSQAGGAVCPNGLCCSKYGWCGSTDTYCKDGCQSQC GGTTPTP  
TTPTPTPTQGGDVSSIIISQSNFDEMLKHRNDNACSGHGFYTYAAFISAAQSFPGFGTTGDTDTRKRELA  
AFLGQTSHETTGGWAAAPDGPY**AWGYCFVQEQGASGAFCT**SPEYPC**APGKQYYGR**GPIQLTHNYNYAQA  
GTAINQDLINNPDLVAT**DPTISFK**TAIWFWMTPQSNKPSSHDVITGKWTPSSADSAAGR**VPGYGVITNI**  
**INGGLECGK**SI**AK**QEDR**IGFYK**RYCDVLGVGYGNNLDCNSQRPFA

# Protein No.: I-1459

**Protein name and Species:**

**Dynamin, putative OS=Ricinus communis GN=RCOM\_0718390**

**PE=3 SV=1**

**Accession: tr|B9SBH8|B9SBH8\_RICCO**

**Unused ProtScore: 1.51**

**Seq Cov %: 8.9**

**ITRAQ Changed Ratio:**

**117: 115=E3TL: D3TL=0.60**

**116: 114=E5TL: D5TL=0.56**

**Annotated typical Precursor MS Region:**

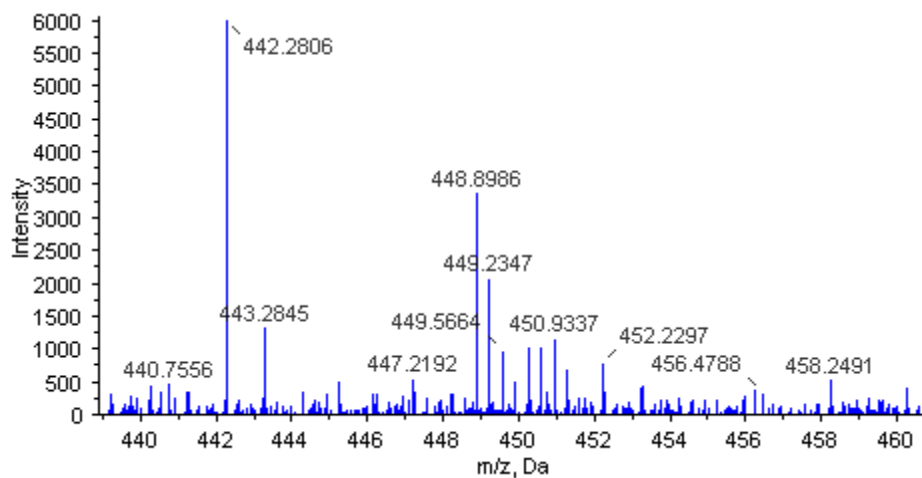

## Sequence Coverage and Matched peptides: in different color

MENLISLVNKIQRACTALGDHGEESALPTLWDSLPSIAVVGGQSSGKSSVLESIVGKDFLPRGAGIVTR  
RPLVLQLHRVDEGKEYAEFMHLPRKKFSDFAAVRKEISDETDRETGRSKQISTVPIHLSIYSPNVNLT  
LIDLPGLTQVAVDGPESIVLDIENMIRSYIEKPNCIILAI SPANQDLATSDAIKISREVDPKGERTFG  
VLTkVDLMDKGTDAVDILEGKSYKIQFPWIGVVNRSQADINKSVDMLAARRKEREYFQNSTEYRHLAHR  
MGSEHLGKMLSKHLEQVIKSRIPGLQSLINKTIAELEGEELSRLGKPVATDAGGKLYMIMEICRSFDQIF  
KEHLDGIRPGDKIYLVFDNQLPAALKRLQFDKHL SIDNVRKLITEADGYQPHLIAPEQGYRRLIESTL  
VTIRGPAAEA AVDAHVLLKELVQKSINETLELKYPTLRVEVSNAAIESLDRMREESKKATLQLVDMEC  
CYLTVEFFRKL PQDIEKGGNPTHSIFDRYND SYLRRVGSNVL SYVNMVCGSLRNSIPKSVVYCQVRDAK  
RSLLDYFFAELGKKETKQLSSLLDEDPAVMQRRISLAKRLELYRSAQAEIDAVAWAK

# Protein No.: I-1464

**Protein name and Species:**

**Alanine aminotransferase 1 OS=Glycine max GN=AlaAT1 PE=2**

**SV=1**

**Accession: tr|A8IKE1|A8IKE1\_SOYBN**

**Unused ProtScore: 1.5**

**Seq Cov %: 7.2**

**ITRAQ Changed Ratio:**

**117: 115=E3TL: D3TL=0.60**

**116: 114=E5TL: D5TL=0.94**

**Annotated typical Precursor MS Region:**

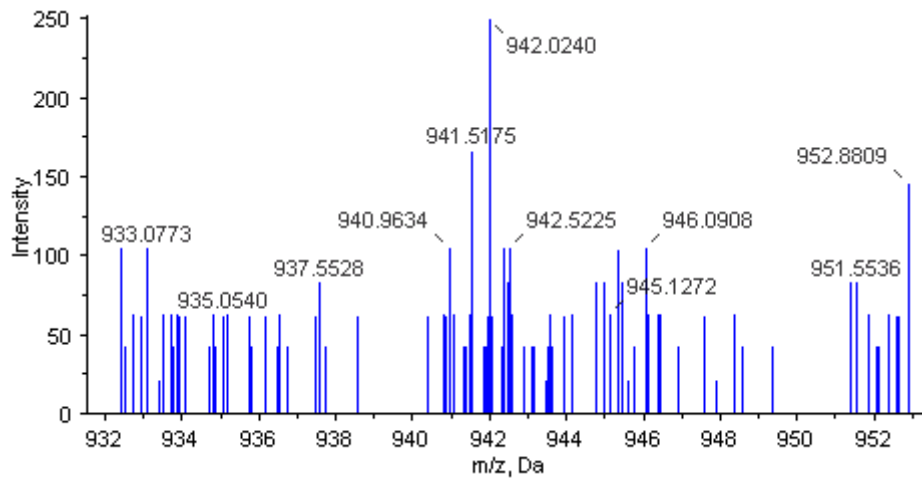



## Sequence Coverage and Matched peptides: in different color

MASDSPFPVTAQNINPKVLKCEYAVRGEVVTLAQNLQKDLQANPGSHPPFDEILYCNIGNPQSLGQQPIT  
FFR**EVLALCDHPAILDKSETQGLFSTDAIQRAWQIVDQIPGRATGAYSHSQGVK**GLRDTIAAGIEERDG  
FPANPDDIFMTDGASPAVHNMMQLLIRSENDGILCPIPQYPLYSASIALHGGCLVPYYLDEATGWGLEI  
PELKKQL**EAAK**SKGINVR**ALVVINPGNPTGQVLGEANQR**DIVEFCK**QEGLVLLADEVYQENVYVPEK**KF  
HSFKKVSRSMGYGENDITLVSFQSVSKGYHG**ECGK****GGYMEVTGFSAEVR**EQIYKVASVNLCSNISGQI  
LASLVMSPPKVGDESYSFMAEK**ENILASLARRAKTLEDAFNKLEGVTCNK**AEGAMYLFPQIRLSEKAI  
KAAEAANATPDNFYCKRLLNATGVVVVPGSGFGQVPGTWHFRCTILPPEEKIPAIVTRLTEFHEKFMDE  
FRD

# Protein No.: I-1467

**Protein name and Species:**

**L-lactate dehydrogenase OS=Arabidopsis thaliana PE=2 SV=1**

**Accession: [tr|Q8LBD5|Q8LBD5\\_ARATH](#)**

**Unused ProtScore: 1.49**

**Seq Cov %: 20.7**

**ITRAQ Changed Ratio:**

**117: 115=E3TL: D3TL=0.52**

**116: 114=E5TL: D5TL=0.24**

**Annotated typical Precursor MS Region:**

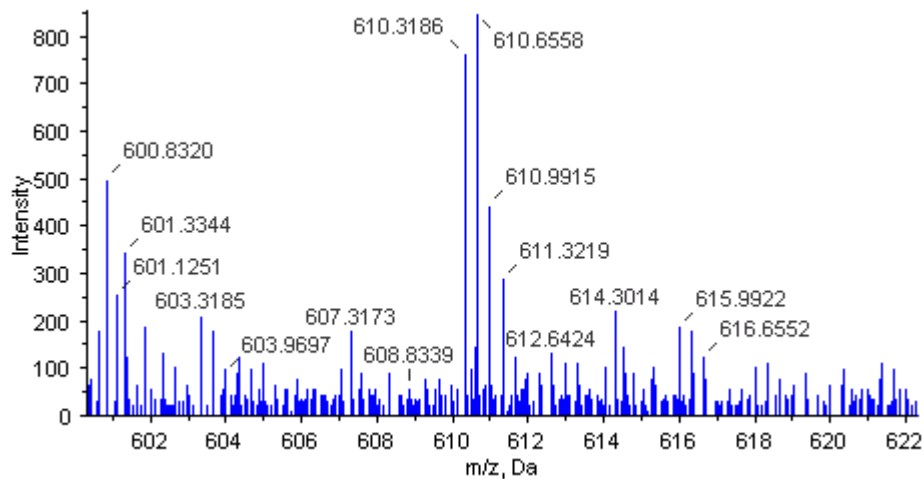

## Sequence Coverage and Matched peptides: in different color

MEKN**ASTSSLK**DLGPSGLDLTS**AFFK**PIHNSDPSLPSNRRTKVSVVGVGNVGMATAQ**TILTQDLADEIA**  
**LVDAK**PDKLR**GEMLDLQHAAAF**LPR**TK**ITASVDYEV**TAGSDLCIVTAGAR**QNPGESR**LNLLQR**NVALFR  
HIIPPLAKASPDSILIIIVSNPVDVLTYYVAWKLSGFVNR**VLGSGTNLDS**SRFRFLIADHLDVNAQDVQA  
FIVGEHGDSSVALWSSISVGGIPVLSFLEKNQIAYEKQTLEDIHQAVVGSAYEV**IGLKGYSWAIGYSV**  
**ANLAR**TILRDQRKIHPVTVLARGFYGVDGGDVFLSLPALLGRNGVAVTNVHMTDEEAEKLQKSAKTIL  
EMXSQLGL

# Protein No.: I-1479

**Protein name and Species:**

**S-formylglutathione hydrolase-like [Glycine max] OS=Glycine  
max PE=2 SV=1**

**Accession: tr|C6TB50|C6TB50\_SOYBN**

**Unused ProtScore: 1.43**

**Seq Cov %: 14.7**

**ITRAQ Changed Ratio:**

**117: 115=E3TL: D3TL=0.64**

**116: 114=E5TL: D5TL=0.79**

**Annotated typical Precursor MS Region:**

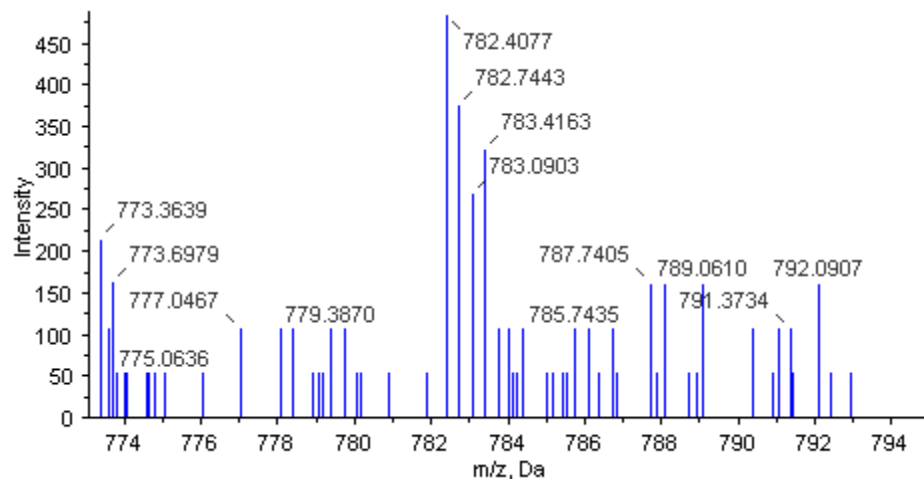

## Sequence Coverage and Matched peptides: in different color

MDTRPTEISSGK**MFGGYNK**RFKHFSLTLGCSMNFHIYFPPSPSPSHKFPVLYFLSGLTCTDENFIFKSG  
AQR**AASAEGVALVAPDTS**PRGLNVEGEADSWDLGVGAGFYLNATQEKWKNWR**MYDYVVK**ELPKLLSDNF  
PQLEISK**ASIFGH**SMGGHG**ALTIFLKN**QDKYK**SVSAFAPIANPINC**PGQKAFSNYLGDNKF EWEDYDA  
TRLVTKFPNVSSTILIDQGEDDKFLPDQLLPHKFEEACKKANVPLLLRFQPGYDHLYYFIATFIDHIR  
HHAQAFRLN

# Protein No.: I-1487

**Protein name and Species:**

**Aminotransferase      YbdL-like      OS=Vitis      vinifera**

**GN=VIT\_18s0001g03300 PE=4 SV=1**

**Accession: [tr|E0CR92|E0CR92\\_VITVI](#)**

**Unused ProtScore: 1.4**

**Seq Cov %: 5.1**

**ITRAQ Changed Ratio:**

**117: 115=E3TL: D3TL=2.25**

**116: 114=E5TL: D5TL=1.82**

**Annotated typical Precursor MS Region:**

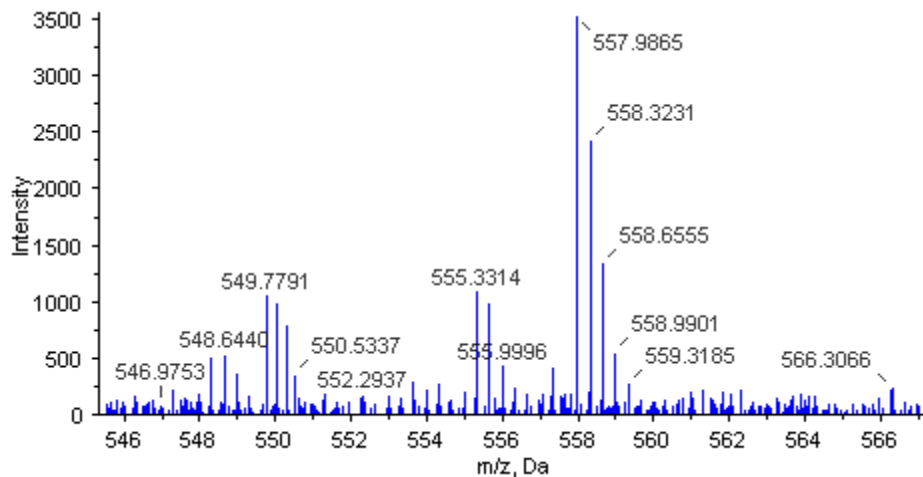

## Sequence Coverage and Matched peptides: in different color

MASASTVSAPNTEAEQTHNPPQPLQVAKRLEKFKTTTIFTQMSMLAIKHGAINLGQGFNFDGPEFVKEA  
AIQAIKDGKNQYARGYGVPDLNSAVADRFKKDTGLVVDPEKEVTVTSGCTEAIAATMLGLINPGDEVIL  
FAPFYDSYEATLSMAGAQIKSITLRPPDFAVPMDELKSAISKNTRAILLINTPHNPTGKMF'TREELNVIA  
SLCIENDVLVFTDDEVYDKLAFEMDHISMASLPGMYERTVTMNSLGKTFSLTGWKIGWTVAPPHLTWGVR  
QAHSFLTTFATCTPMQWAAATALRAPDSYEEELKRDYSAKKAIVVEGLKAVGFRVYPSSGTYFVVVDHTP  
FGLKDDIAFC EYLKKEVGVVAIPTSVFYLHPEDGKNLVRFTFCKDEGTLRAAVERMKEKLPKQ

# Protein No.: I-1494

**Protein name and Species:**

**Putative uncharacterized protein OS=Vitis vinifera**

**GN=VIT\_19s0014g01520 PE=4 SV=1**

**Accession: [tr|F6H2P8|F6H2P8\\_VITVI](#)**

**Unused ProtScore: 1.39**

**Seq Cov %: 6.5**

**ITRAQ Changed Ratio:**

**117: 115=E3TL: D3TL=0.13**

**116: 114=E5TL: D5TL=0.29**

**Annotated typical Precursor MS Region:**

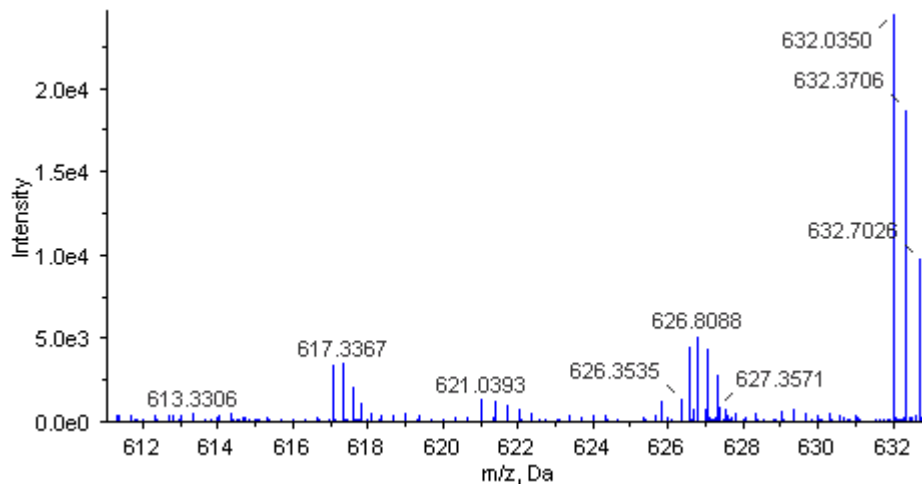



## Sequence Coverage and Matched peptides: in different color

MALRHLTPLSPLSPFTRIPPRRCFTQKPFSLSVSASMGSSSRKVLVPIAHGSEPMEAVII **IDVLR** **AGA**  
**DVTVASVEK**RLQVDACHGVKIVADALISDCADTGFDLISLPGGMPGAATLRDCGMLESVMVKKHAADGQL  
YAGICAAPAVALGSWGLMKGLKATCYP SFMEQLSSTATTVESRVQQDGKVVTSRGP GTTMEFSVSLVEQ  
LYGKEKANEVSGPLVMCSNLGDKFIMAELNPIDWKCDNPQILVPIANGTEEMEAVII **IDFLR** **AK** **ANVV**  
**VASVEDK**LEIVASRKVKLVADVLLDEAVK **LSYDLIVLP** **GGG** **GGAQ**AFASSEKLVNLLKNQRESNKP YGA  
ICASPALVLEPHGLLKGGKATAFPALCSKLSQSEIENRVLVDGNLITSRGP GTSMEFALAIIEKFFGH  
GK **ALELAK**VMLFSSQ

# Protein No.: I-1523

## Protein name and Species:

succinyl-CoA ligase [ADP-forming] subunit alpha-1,  
mitochondrial-like [Glycine max] OS=Glycine max PE=2 SV=1

Accession: [tr|C6TNV4|C6TNV4\\_SOYBN](#)

Unused ProtScore: 1.31

Seq Cov %: 3.1

## ITRAQ Changed Ratio:

117: 115=E3TL: D3TL=2.11

116: 114=E5TL: D5TL=1.52

## Annotated typical Precursor MS Region:

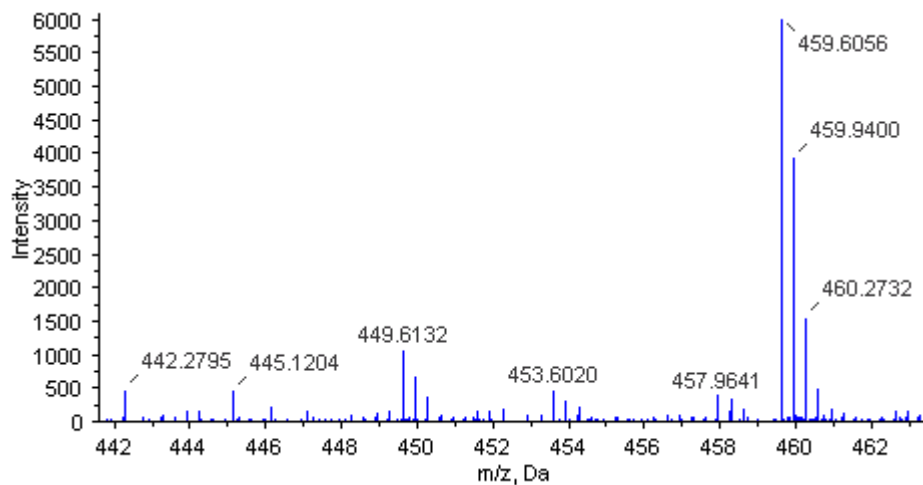

## Sequence Coverage and Matched peptides: in different color

MGRQAVTKLLSSIASRRHGLRLFSAASPAV**FVDK**STRVICQGITGKNGTFHTEQAIEYGTNMVGGVTPK  
KGGTEHLGLPVFNTV**AEAK**AETKANASVIYVPPPFAAAAIMEAMEAELDLVVCITEGIPQHDMVRVKAA  
LNRQSKTRLIGPNCPGI IKPGECKIGIMPGYIHKPGRIGIVSRSGTLTYEAVFQTTAVGLGQSTCVGIG  
GDPFNGTNFVDCLQKFLTDPQTEGI ILIGEIGGTAEED**AAALIK**DSGTEKPVVAFIAGLTAPPGRRMGH  
AGAIVSGGKGTAQDKIKTLREAGVMVVE**SPA**K**IGAAMLDFK**QRGLVQ

**Supplementary Figure S5:**  
**Supplemental spectra and MALDI TOF/TOF MS**  
**/MS identification information**

Annotated spectra for the 59 phosphorlated latex proteins  
on identified by TOF, TOF/TOF and LC-MALDI MS/MS.

**CID:** collision induced desorption;

**MALDI TOF:**

matrix assisted laser desorption/ionization time of flight;

**MS:** mass spectrometry;

**PMF:** peptide mass fingerprinting;

**PFF:** peptide fragment fingerprinting.

Spot No.: **P1**

NCBI accession No.: **gi|123650**

Species: *Petunia x hybrida*

Protein name: **Heat shock cognate 70 kDa protein**

Mascot score: **97**

Sequence coverage %: **40**

Matched peptides No.: **24**

Total peptides No.: **41**

Calculated Mr: **71581**

Calculated pI: **5.11**

Probability Based Mowse Score:

Protein score is  $-10 \cdot \log(P)$ , where P is the probability that the observed match is a random event. Protein scores greater than 73 are significant ( $p < 0.05$ ).

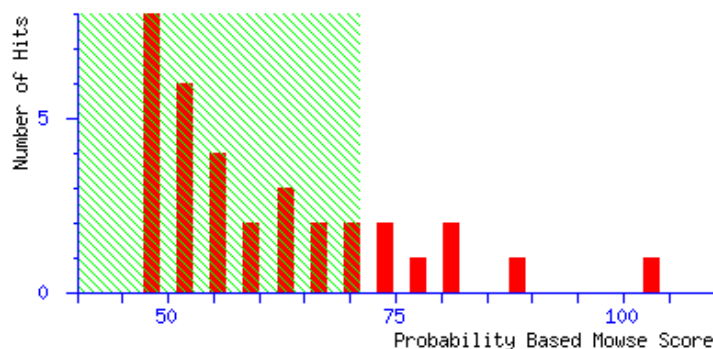

Matched peptide sequences: shown in **Bold Red**:

```
1  EGPAIGIDLG  TTYSCVGVWQ  HDRVEI IAND  QGNRTTPSYV  GFTDTERLIG
51  DAAKNQVAMN  PINTVFDAGR  LIGRRFSDPS  VQSDIKLWPF  KVIPGPGDKP
101 MIVVTYKGEE  KQFAAEEISS  MVLTKMKEIA  EAYLGTTIKRN  AVVTVPAYFN
151 DSQRQATKDA  GVIAGLNVMR  IINEPTAAAI  AYGLDKKASS  AGEKNVLIFD
201 LGGGTFDVSL  LTIEEGIFEV  KATAGDTHLG  GEDFDNRMVN  HFVQEFKRKN
251 KKDISGNPRA  LRRLRTACER  AKRTLSSTAQ  TTIEIDSLYE  GIDFYSTITR
301 ARFEELNMDL  FRKCEPVEK  CLRDAKMDKS  SVHDVVLVGG  STRIPKVQQL
351 LQDFFNKEL  CKSINPDEAV  AYGAAVQAAI  LSGEGNEKVQ  DLLLLDVTPL
401 SLGLETAGGG  MTVLIPRNTT  IPTKKEQVFS  TYSDNQPGVL  IQVYEGERAR
451 TKDNNLLGKF  ELSGIPPAPR  GVPQITVCFD  IDANGILNVS  AEDKTTGQKN
501 KITITNDKGR  LSKEEIERMV  QEAKEYKSED  EELKKKVEAK  NALENYAYNM
551 RNTIKDDKIN  SQLSAADKRR  IEDAIDEAIK  WLDNNQLAEA  DEFEDKMKEL
601 ESICNPIIAK  MYQGGAGGAT  MDEDGPSVGG  SAGSQTGAGP  KIEEVD
```

Spot No.: **P2**

NCBI accession No.: **gi| 249262** Species: *Manihot esculenta*

**PFF** score: **[54]**

Protein name: **linamarase**

Matched peptides No.: **[1]** Sequence coverage %: **[3]**

Matched sequences: **R.ILDGSNGDVAVDFYNR.Y**

Calculated Mr: **61448**

Calculated pl: **5.52**

Probability Based Mowse Score:

Ions score is  $-10 \cdot \log(P)$ , where  $P$  is the probability that the observed match is a random event. Individual ions scores  $> 45$  indicate identity or extensive homology ( $p < 0.05$ ). Protein scores are derived from ions scores as a non-probabilistic basis for ranking protein hits.

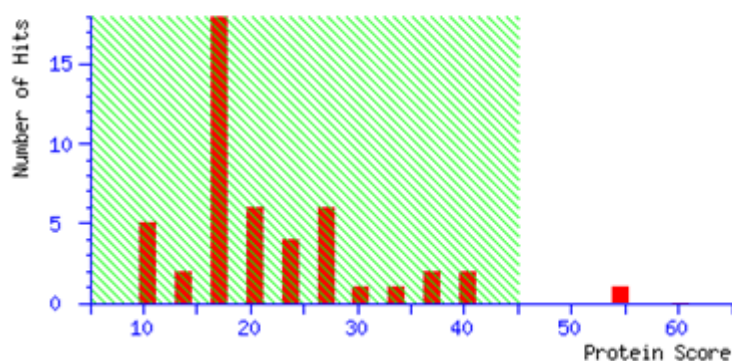

Matched peptide sequences: shown in **Bold Red**:

```
1 MLVLFISLLA LTRPAMGTDD DDDNIPDDFS RKYFPDDFIF GTATSAYQIE
51 GEATAKGRAP SVWDIFSKET PDRILDGSNG DVAVDFYNRY IQDIKNVKKM
101 GFNAFRMSIS WSRVIPSGRR REGVNEEGIQ FYNDVINEII SNGLEPFVTI
151 FHWDTQPALQ DKYGGFLSRD IVYDYLQYAD LLFERFGDRV KPWMTFNEPS
201 AYVGFHDDG VFAPGRCSSW VNRQCLAGDS ATEPYIVAHN LLLSHAAAVH
251 QYRKYQGTQ KGKIGITLFT FWYEPLSDSK VDVQAAKTAL DFMFGLWMDP
301 MTYGRYPRTM VDLAGDKLIG FTDEESQLLR GSYDFVGLQY YTAYYAEPIP
351 PVDPKFRRYK TDSGVNATPY DLNGNLIGPQ AYSSWFYIFP KGIRHFLNYT
401 KDTYNDPVIY VTENGVDNYN NESQPIEEAL QDDFRISYYK KHMWNALGSL
451 KNYGVKLGKY FAWSYLDNFE WNIGYTSRFG LYYVDYKNNL TRYPKKSAHW
501 FTKFLNISVN ANNIYELTSK DSRKVGKFYV M
```

Spot No.: **P3**

NCBI accession No.: **gi| 224100473** Species: *Populus trichocarpa*

**PFF** score: **[112]**

Protein name: **predicted protein**

Matched peptides No.: **[1]**

Sequence coverage %: **[3]**

Matched sequences: **R.SPPIEEVIQAGVVPR.F**

Calculated Mr: **46093**

Calculated pl: **4.54**

Probability Based Mowse Score:

Ions score is  $-10 \cdot \log(P)$ , where P is the probability that the observed match is a random event. Individual ions scores  $> 46$  indicate identity or extensive homology ( $p < 0.05$ ). Protein scores are derived from ions scores as a non-probabilistic basis for ranking protein hits.

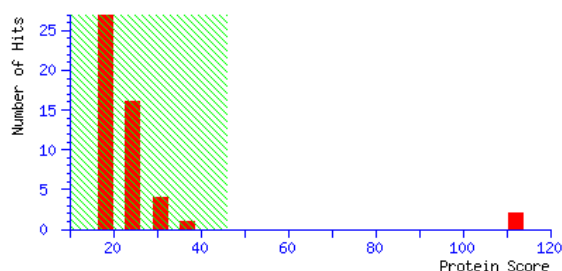

Matched peptide sequences: shown in **Bold Red**:

```
1  GVWSEdGNLQ  LESTTQFRKL  LSIERSSPPIE EVIQAGVVPR  FVEFLVREDF
51 PQLQFEAWA  LTNIASGTSE  NTKVVIDHGA  VPIFVKLLGS  PSDDVREQAV
101 WALGNVAGDS  PKCRDLVLSH  GALIPLLAQL  NEHAKLSMLR  NATWTLSNFC
151 RGKPQPPFEQ  VRPALPALER  LVHSTDEEVL  TDSCWALSYL  SDGTDDKIQA
201 VIEAGVCPRL  VELLHSPSPS  VLVPALRTVG  NIVTGDDMQT  QVKALLAFCL
251 FVPSFAVIEN  GLIGPLVNLL  QNAEFDIKKE  AAWAVSNATS  GGTHEQIKFL
301 VSQGCiKPLC  DLLVSPDPRI  VTVSLEGLen  ILKVGEAEKN  LGNSGDANFY
351 AQMIDDAEGL  EKIEMLQSHD  NNEIYEKAVK  ILETYWLEED  DETLPSGDGA
401 QQGFQFGGNG  VQVPSGGFNF
```

Spot No.: **P4**

NCBI accession No.: **gi| 249262** Species: *Manihot esculenta*

**PFF** score: **[56]**

Protein name: **linamarase**

Matched peptides No.: **[1]** Sequence coverage %: **[3]**

Matched sequences: **R.ILDGSNGDVAVDFYNR.Y;**

Calculated Mr: **61448**

Calculated pI: **5.52**

Probability Based Mowse Score:

Ions score is  $-10 \cdot \log(P)$ , where P is the probability that the observed match is a random event. Individual ions scores  $> 45$  indicate identity or extensive homology ( $p < 0.05$ ). Protein scores are derived from ions scores as a non-probabilistic basis for ranking protein hits.

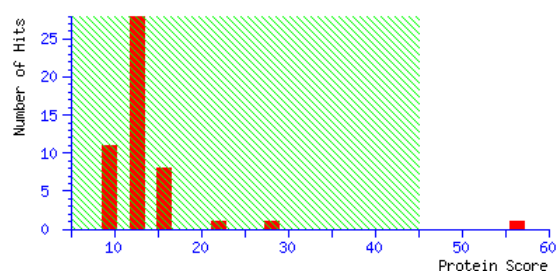

Matched peptide sequences: shown in **Bold Red**:

```
1  MLVLFISLLA  LTRPAMGTDD  DDDNIPDDFS  RKYFPDDFIF  GTATSAYQIE
51  GEATAKGRAP  SVWDIFSKET  PDRILDGSNG  DVAVDFYNRY  IQDIKNVKKM
101 GFNAFRMSIS  WSRVIPSGRR  REGVNEEGIQ  FYNDVINEII  SNGLEPFVTI
151 FHWDTPQALQ  DKYGGFLSRD  IVYDYLQYAD  LLFERFGDRV  KPWMTFNEPS
201 AYVGFAHDDG  VFAPGRCSSW  VNRQCLAGDS  ATEPYIVAHN  LLLSHAAAVH
251 QYRKYQGTQ   KGKIGITLFT  FWYEPLSDSK  VDVQAAKTAL  DFMFGLWMDP
301 MTYGRYPRTM  VDLAGDKLIG  FTDEESQLLR  GSYDFVGLQY  YTAYYAEPIP
351 PVDPKFRRYK  TDSGVNATPY  DLNGNLIGPQ  AYSSWFYIFP  KGIRHFLNYT
401 KDTYNDPVIY  VTENGVDNYN  NESQPIEEAL  QDDFRISYYK  KHMWNALGSL
451 KNYGVKLGKY  FAWSYLDNFE  WNIGYTSRFG  LYYVDYKNNL  TRYPKSAHW
501 FTKFLNISVN  ANNIYELTSK  DSRKVGKFYV  M
```



Spot No.: **P5**

NCBI accession No.: **gi|29170601** Species: *Hevea brasiliensis*

**PFF** score: **[502]**

Protein name: **Small rubber particle protein**

Matched peptides No.: **[12]** Sequence coverage %: **[53]**

Calculated Mr: **12769**

Calculated pI: **4.61**

Matched sequences:

| Query              | Start - End | Observed  | Mr(expt)  | Mr(calco) | ppm   | M | Score | Expect  | Rank | U | Peptide                 |
|--------------------|-------------|-----------|-----------|-----------|-------|---|-------|---------|------|---|-------------------------|
| <a href="#">24</a> | 6 - 20      | 1865.8870 | 1864.8797 | 1864.7711 | 58.3  | 0 | 128   | 2.6e-10 | 1    | U | K.ENENFQQEANEQEEK.L     |
| <a href="#">25</a> | 6 - 20      | 1865.8879 | 1864.8806 | 1864.7711 | 58.7  | 0 | 135   | 6.1e-11 | 1    | U | K.ENENFQQEANEQEEK.L     |
| <a href="#">26</a> | 6 - 20      | 1865.9290 | 1864.9217 | 1864.7711 | 80.8  | 0 | 98    | 2.6e-07 | 1    | U | K.ENENFQQEANEQEEK.L     |
| <a href="#">18</a> | 47 - 64     | 1810.9230 | 1809.9157 | 1809.9472 | -17.4 | 1 | 110   | 2.3e-08 | 1    | U | K.DNSGPLKPGVETIEGVAK.T  |
| <a href="#">19</a> | 47 - 64     | 1810.9230 | 1809.9157 | 1809.9472 | -17.4 | 1 | 110   | 2.3e-08 | 1    | U | K.DNSGPLKPGVETIEGVAK.T  |
| <a href="#">20</a> | 47 - 64     | 1810.9230 | 1809.9157 | 1809.9472 | -17.4 | 1 | 110   | 2.3e-08 | 1    | U | K.DNSGPLKPGVETIEGVAK.T  |
| <a href="#">21</a> | 47 - 64     | 1811.0605 | 1810.0532 | 1809.9472 | 58.6  | 1 | 153   | 1.4e-12 | 1    | U | K.DNSGPLKPGVETIEGVAK.T  |
| <a href="#">22</a> | 47 - 64     | 1811.0624 | 1810.0551 | 1809.9472 | 59.6  | 1 | 149   | 3e-12   | 1    | U | K.DNSGPLKPGVETIEGVAK.T  |
| <a href="#">23</a> | 47 - 64     | 1811.1030 | 1810.0957 | 1809.9472 | 82.0  | 1 | 142   | 1.6e-11 | 1    | U | K.DNSGPLKPGVETIEGVAK.T  |
| <a href="#">28</a> | 84 - 101    | 1902.9020 | 1901.8947 | 1902.0462 | -79.7 | 0 | 85    | 5.6e-06 | 1    | U | R.AVDASFTTLQNIIVPSVLK.Q |
| <a href="#">29</a> | 84 - 101    | 1903.1536 | 1902.1463 | 1902.0462 | 52.6  | 0 | 41    | 0.14    | 1    | U | R.AVDASFTTLQNIIVPSVLK.Q |
| <a href="#">30</a> | 84 - 101    | 1903.1600 | 1902.1527 | 1902.0462 | 56.0  | 0 | 113   | 8.7e-09 | 1    | U | R.AVDASFTTLQNIIVPSVLK.Q |
| <a href="#">6</a>  | 102 - 113   | 1347.7456 | 1346.7383 | 1346.6500 | 65.6  | 0 | 96    | 5.5e-07 | 1    | U | K.QLPTQACDTSVK.E        |
| <a href="#">7</a>  | 102 - 113   | 1347.7468 | 1346.7395 | 1346.6500 | 66.5  | 0 | 102   | 1.4e-07 | 1    | U | K.QLPTQACDTSVK.E        |

Probability Based Mowse Score:

Ions score is  $-10 \cdot \log(P)$ , where P is the probability that the observed match is a random event. Individual ions scores  $> 46$  indicate identity or extensive homology ( $p < 0.05$ ). Protein scores are derived from ions scores as a non-probabilistic basis for ranking protein hits.

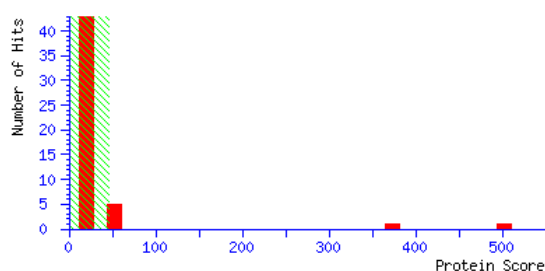

Matched peptide sequences: shown in **Bold Red**:

1 MAEGKENENF **QQEANEQEEK** LKYLEFVQAT TDNAVTALSN IYLYAKDNSG  
51 **PLKPGVETIE** **GVAKTVVIPA** SKIPTEAIKF ADRAVDASFT **TLQNIIVPSVL**  
101 **KQLPTQACDT** **SVKESAE**

Spot No.: **P6**

NCBI accession No.: **gi|29170601** Species: *Hevea brasiliensis*

PFF score: **[429]**

Protein name: **Small rubber particle protein**

Matched peptides No.: **[18]** Sequence coverage %: **[53]**

Calculated Mr: **12769**

Calculated pI: **4.61**

Matched sequences:

| Query               | Start - End | Observed  | Mr (expt) | Mr (calc) | ppm   | M | Score | Expect  | Rank     | U | Peptide                 |
|---------------------|-------------|-----------|-----------|-----------|-------|---|-------|---------|----------|---|-------------------------|
| <a href="#">#28</a> | 6 - 20      | 1865.7990 | 1864.7917 | 1864.7711 | 11.1  | 0 | 67    | 0.00033 | <u>1</u> | U | K.ENENFQQEANEQEEK.L     |
| <a href="#">#29</a> | 6 - 20      | 1865.7990 | 1864.7917 | 1864.7711 | 11.1  | 0 | 67    | 0.00033 | <u>1</u> | U | K.ENENFQQEANEQEEK.L     |
| <a href="#">#30</a> | 6 - 20      | 1865.8870 | 1864.8797 | 1864.7711 | 58.3  | 0 | 104   | 7.5e-08 | <u>1</u> | U | K.ENENFQQEANEQEEK.L     |
| <a href="#">#31</a> | 6 - 20      | 1865.8879 | 1864.8806 | 1864.7711 | 58.7  | 0 | 114   | 7.6e-09 | <u>1</u> | U | K.ENENFQQEANEQEEK.L     |
| <a href="#">#32</a> | 6 - 20      | 1865.9290 | 1864.9217 | 1864.7711 | 80.8  | 0 | 74    | 7.8e-05 | <u>1</u> | U | K.ENENFQQEANEQEEK.L     |
| <a href="#">#22</a> | 47 - 64     | 1810.9230 | 1809.9157 | 1809.9472 | -17.4 | 1 | 78    | 3.9e-05 | <u>1</u> | U | K.DNSGPLKPGVETIEGVAK.T  |
| <a href="#">#23</a> | 47 - 64     | 1810.9230 | 1809.9157 | 1809.9472 | -17.4 | 1 | 78    | 3.9e-05 | <u>1</u> | U | K.DNSGPLKPGVETIEGVAK.T  |
| <a href="#">#24</a> | 47 - 64     | 1810.9230 | 1809.9157 | 1809.9472 | -17.4 | 1 | 78    | 3.9e-05 | <u>1</u> | U | K.DNSGPLKPGVETIEGVAK.T  |
| <a href="#">#25</a> | 47 - 64     | 1811.0605 | 1810.0532 | 1809.9472 | 58.6  | 1 | 111   | 1.7e-08 | <u>1</u> | U | K.DNSGPLKPGVETIEGVAK.T  |
| <a href="#">#26</a> | 47 - 64     | 1811.0624 | 1810.0551 | 1809.9472 | 59.6  | 1 | 121   | 2e-09   | <u>1</u> | U | K.DNSGPLKPGVETIEGVAK.T  |
| <a href="#">#27</a> | 47 - 64     | 1811.1030 | 1810.0957 | 1809.9472 | 82.0  | 1 | 94    | 8.9e-07 | <u>1</u> | U | K.DNSGPLKPGVETIEGVAK.T  |
| <a href="#">#34</a> | 84 - 101    | 1902.9020 | 1901.8947 | 1902.0462 | -79.7 | 0 | 67    | 0.00034 | <u>1</u> | U | R.AVDASFTTLQNIIVPSVLK.Q |
| <a href="#">#35</a> | 84 - 101    | 1903.1536 | 1902.1463 | 1902.0462 | 52.6  | 0 | 40    | 0.16    | <u>1</u> | U | R.AVDASFTTLQNIIVPSVLK.Q |
| <a href="#">#36</a> | 84 - 101    | 1903.1600 | 1902.1527 | 1902.0462 | 56.0  | 0 | 109   | 2.2e-08 | <u>1</u> | U | R.AVDASFTTLQNIIVPSVLK.Q |
| <a href="#">#7</a>  | 102 - 113   | 1347.6600 | 1346.6527 | 1346.6500 | 2.00  | 0 | 16    | 53      | <u>1</u> | U | K.QLPTQACDTSVK.E        |
| <a href="#">#10</a> | 102 - 113   | 1347.6600 | 1346.6527 | 1346.6500 | 2.00  | 0 | 16    | 53      | <u>1</u> | U | K.QLPTQACDTSVK.E        |
| <a href="#">#9</a>  | 102 - 113   | 1347.7456 | 1346.7383 | 1346.6500 | 65.6  | 0 | 84    | 1e-05   | <u>1</u> | U | K.QLPTQACDTSVK.E        |
| <a href="#">#10</a> | 102 - 113   | 1347.7468 | 1346.7395 | 1346.6500 | 66.5  | 0 | 86    | 6e-06   | <u>1</u> | U | K.QLPTQACDTSVK.E        |

Probability Based Mowse Score:

Ions score is  $-10 \cdot \log(P)$ , where P is the probability that the observed match is a random event. Individual ions scores > 45 indicate identity or extensive homology ( $p < 0.05$ ). Protein scores are derived from ions scores as a non-probabilistic basis for ranking protein hits.

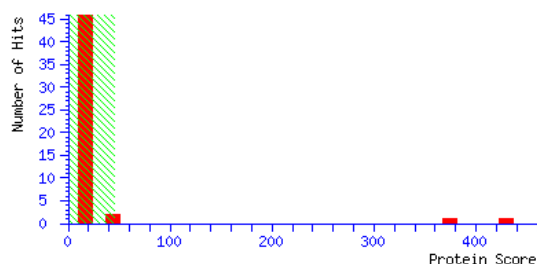

Matched peptide sequences: shown in **Bold Red**:

1 MAEG**KENENF QQEANEQEEK** LKYLEFVQAT TDNAVTALSN IYLYAKDNSG  
51 **PLKPGVETIE GVAKTVVIPA** SKIPTEAIKF ADRAVDASFT TLQNIIVPSVL  
101 **KQLPTQACDT SVKESAE**

Spot No.: **P7**

NCBI accession No.: **gi| 224071449** Species: *Populus trichocarpa*

**PFF** score: **[75]**

Protein name: **predicted protein**

Matched peptides No.: **[1]**

Sequence coverage %: **[2]**

Matched sequences: **K.NKIDVIPHYPGR.L;**

**K.IDVIPHYPGR.L**

Calculated Mr: **47121**

Calculated pl: **5.28**

Probability Based Mowse Score:

Ions score is  $-10 \cdot \log(P)$ , where P is the probability that the observed match is a random event. Individual ions scores  $> 45$  indicate identity or extensive homology ( $p < 0.05$ ). Protein scores are derived from ions scores as a non-probabilistic basis for ranking protein hits.

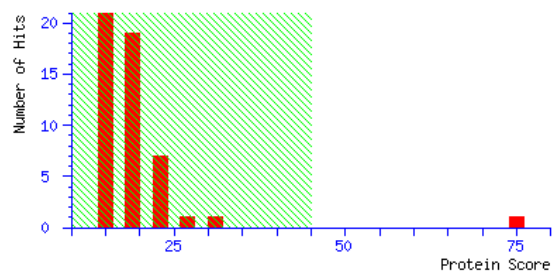

Matched peptide sequences: shown in **Bold Red**:

```
1  MDGTSEATWP  EILGSRNWDN  LLDPLDLSLR  KLILRCGDFC  QATYDAFNND
51  QNSRYCGTSR  YGKRNFHFKV  MLDNPENYQV  SSFLYATARV  SLPEAFLLHS
101 LSRDSWDRET  NWIGYIAVTS  DEQTKTLGRR  EIYIAFRGTT  RNYEWDILG
151 AKLKSAPLL   RGATSTTHDQ  ESSSSDDDD   DKVPKVMLGW  LTMYSDDPN
201 SPFTKLSARA  QLLAHIKELR  ERYKDDDLSE  IFTGHSLGAS  LSILSAFDLV
251 ENGITDIPVS  AFVFGSPQVG  NKEFNERFNK  YPNLKVLIHK  NKIDVIPHYP
301 GRLMGYVYTG  IEFIDTRKS  PSLKDSKNPS  DWHNLQAMLH  IVAGWNGEEQ
351 EFELKVKRSL  ALVKNKSEFL  KDECLVPGIW  WVEKNKGMVR  NEDGEWVLP
401 PDEEDLPVPE  C
```

Spot No.: **P8**

NCBI accession No.: **gi| 32186890** Species: *Gossypium hirsutum*

**PFF** score: **[519]**

Protein name: **actin**

Matched peptides No.: **[8]**

Sequence coverage %: **[37]**

Matched sequences: **K.YPIEHGIVSNWDDMEK.I;**

**K.IWHHTFYNELR.V;**

**R.VAPEEHPVLLTEAPLNPK.A;**

**R.TTGIVLDSGDGVSHTVPIYEGYALPHAILR.L;**

**K.LAYVALDYEQELETAK.S;**

**K.NYELPDGQVITIGAER.F;**

**R.KDLYGNIVLSGGSTMFPGIADR.M + Oxidation (M);**

**K.GEYDESGPSIVHR.K**

Calculated Mr: **41917**

Calculated pI: **5.31**

Probability Based Mowse Score:

Ions score is  $-10 \cdot \log(P)$ , where P is the probability that the observed match is a random event. Individual ions scores  $> 45$  indicate identity or extensive homology ( $p < 0.05$ ). Protein scores are derived from ions scores as a non-probabilistic basis for ranking protein hits.

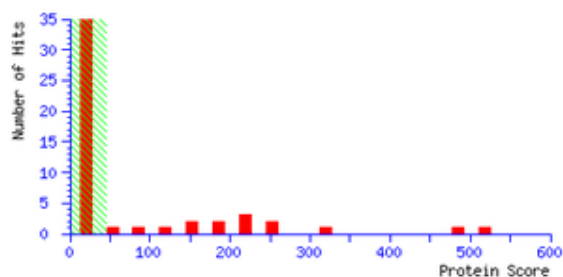

Matched peptide sequences: shown in **Bold Red**:

```
1  MADGEDIQPL  VCDNGTGMVK  AGFAGDDAPR  AVFPSIVGRP  RHTGVMVGMG
51  QKDAYVGDEA  QSKRGILTLK  YPIEHGIVSN  WDDMEKIWHH  TFYNELRVAP
101 EEHPVLLTEA  PLNPKANREK  MTQIMFETFN  VPAMYVAIQA  VLSLYASGRT
151 TGIVLDSGDG  VSHTVPIYEG  YALPHAILRL  DLAGRDLTDA  LMKILTERGY
201  MFTTTAEREI  VRDMKEKLAY  VALDYEQELE  TAKSSSSVEK  NYELPDGQVI
251 TIGAERFRCP  EVLFQPSFIG  MEAAGIHETT  YNSIMKCDVD  IRKDLYGNIV
301 LSGGSTMFPG  IADRMSKEIT  ALAPSSMKIK  VVAPPERKYS  VWIGGSILAS
351  LSTFQQMWIS  KGEYDESGPS  IVHRKCF
```

Spot No.: **P9**

NCBI accession No.: **gi| 14423933** Species: *Hevea brasiliensis*

**PFF** score: **[384]**

Protein name: **Small rubber particle protein**

Matched peptides No.: **[5]**

Sequence coverage %: **[36]**

Calculated Mr: **22331**

Calculated pI: **4.80**

Matched sequences:

| Query               | Start - End | Observed  | Mr(expt)  | Mr(calc)  | ppm  | M Score | Expect | Rank    | U | Peptide                   |
|---------------------|-------------|-----------|-----------|-----------|------|---------|--------|---------|---|---------------------------|
| <a href="#">#27</a> | 36 - 53     | 1881.1389 | 1880.1316 | 1880.0255 | 56.4 | 1       | 86     | 4.6e-06 | 1 | U K.DISGPLKPGVDTIENVVK.T  |
| <a href="#">#12</a> | 91 - 105    | 1620.8983 | 1619.8910 | 1619.7903 | 62.2 | 0       | 118    | 3.3e-09 | 1 | U K.QVSAQTYVAQDAPR.I      |
| <a href="#">#31</a> | 106 - 124   | 1934.1237 | 1933.1164 | 1933.0157 | 52.1 | 0       | 95     | 5.3e-07 | 1 | U R.IVLDVASSVFNTGVQEGAK.A |
| <a href="#">#3</a>  | 134 - 143   | 1236.7086 | 1235.7013 | 1235.6299 | 57.8 | 0       | 61     | 0.002   | 1 | U K.AEQYAVITWR.A          |
| <a href="#">#5</a>  | 183 - 194   | 1346.8149 | 1345.8076 | 1345.7493 | 43.3 | 0       | 25     | 8.1     | 1 | U R.VSSYLPLLPTEK.I        |

Probability Based Mowse Score:

Ions score is  $-10 \cdot \log(P)$ , where P is the probability that the observed match is a random event. Individual ions scores > 45 indicate identity or extensive homology ( $p < 0.05$ ). Protein scores are derived from ions scores as a non-probabilistic basis for ranking protein hits.

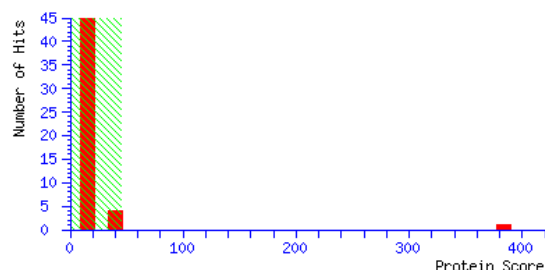

Matched peptide sequences: shown in **Bold Red**:

1 MAEGKENENF **QQEANEQEEK** LKYLEFVQAT TDNAVTALSN IYLYAKDNSG  
51 **PLKPGVETIE** **GVAKTVVIPA** SKIPTEAIKF ADRAVDASFT TLQNIVPSVL  
101 **KQLPTQACDT** **SVKESAE**

Spot No.: **P10**

NCBI accession No.: **gi| 224071449** Species: *Populus trichocarpa*

**PFF** score: **[71]**

Protein name: **predicted protein**

Matched peptides No.: **[1]**

Sequence coverage %: **[2]**

Matched sequences: **K.IDVIPHYPGRL;**

Calculated Mr: **47121**

Calculated *pl*: **5.28**

Probability Based Mowse Score:

Ions score is  $-10 \cdot \log(P)$ , where *P* is the probability that the observed match is a random event. Individual ions scores  $> 45$  indicate identity or extensive homology ( $p < 0.05$ ). Protein scores are derived from ions scores as a non-probabilistic basis for ranking protein hits.

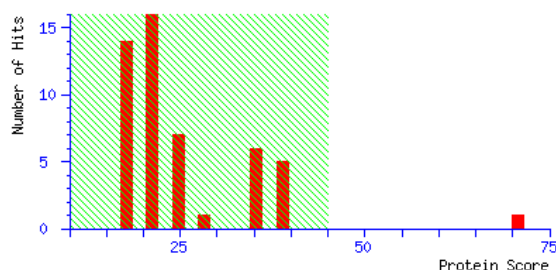

Matched peptide sequences: shown in **Bold Red**:

```
1 MDGTSEATWP EILGSRNWDN LLDPLDLSLR KLILRCGDFC QATYDAFNND
51 QNSRYCGTSSR YGKRNFHFKV MLDNPENYQV SSFLYATARV SLPEAFLLHS
101 LSRDSWDRET NWIGYIAVTS DEQTKTLGRR EIYIAFRGTT RNYEWDILG
151 AKLKSAPLL RGATSTTHDQ ESSSSDDDD DKVPKVMLGW LTMYISDDPN
201 SPFTKLSARA QLLAHIKELR ERYKDDLSI IFTGHSLGAS LSILSAFDLV
251 ENGITDIPVS AFVFGSPQVG NKEFNERFNK YPNLKVLIHK NKIDVIPHY
301 GRLMGVYVTG IEFEIDTRKS PSLKDSKNPS DWHNLQAMLH IVAGWNGEEQ
351 EFELKVKRSL ALVNKSSEFL KDECLVPGIW WVEKNKGMVR NEDGEWVLAP
401 PDEEDLPVPE C
```

Spot No.: **P11**

NCBI accession No.: **gi| 224071449** Species: *Populus trichocarpa*

**PFF** score: **[52]**

Protein name: **predicted protein**

Matched peptides No.: **[1]**

Sequence coverage %: **[2]**

Matched sequences: **K.IDVIPHYPGRL**;

Calculated Mr: **47121**

Calculated pI: **5.28**

Probability Based Mowse Score:

Ions score is  $-10 \cdot \log(P)$ , where P is the probability that the observed match is a random event. Individual ions scores  $> 44$  indicate identity or extensive homology ( $p < 0.05$ ). Protein scores are derived from ions scores as a non-probabilistic basis for ranking protein hits.

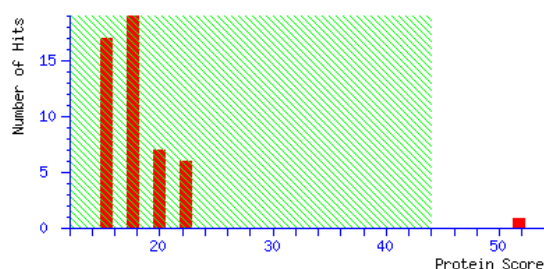

Matched peptide sequences: shown in **Bold Red**:

```
1 MDGTSEATWP EILGSRNWDN LLDPLDLSLR KLILRCGDFC QATYDAFNND
51 QNSRYCGTSR YGKRNFHFKV MLDNPENYQV SSFLYATARV SLPEAFLLHS
101 LSRDSDRET NWIGYIAVTS DEQTKILGRR EIYIAFRGTT RNYEVDILG
151 AKLKSAPLL RGATSTTHDQ ESSSSDDDD DKVPKVMLGW LTMYISDDPN
201 SPFTKLSARA QLLAHIKELR ERYKDDLSI IFTGHSLGAS LSILSAFDLV
251 ENGITDIPVS AFVFGSPQVG NKEFNERFNK YPNLKVLHIK NKIDVIPHY
301 GRLMGYVYTG IEFIDTRKS PSLKDSKNPS DWHNLQAMLH IVAGWNGEEQ
351 EFELKVKRSL ALVKNSSSEFL KDECLVPGIW WVEKNKGMVR NEDGEWVLAP
401 PDEEDLPVPE C
```

Spot No.: **P12**

NCBI accession No.: **gi| 224071449** Species: *Populus trichocarpa*

**PFF** score: **[106]**

Protein name: **predicted protein**

Matched peptides No.: **[2]**

Sequence coverage %: **[2]**

Matched sequences: **K.NKIDVIPHYPGRL;**

**K.IDVIPHYPGRL;**

Calculated Mr: **47121**

Calculated *pI*: **5.28**

Probability Based Mowse Score:

Ions score is  $-10 \cdot \log(P)$ , where P is the probability that the observed match is a random event. Individual ions scores > 43 indicate identity or extensive homology ( $p < 0.05$ ). Protein scores are derived from ions scores as a non-probabilistic basis for ranking protein hits.

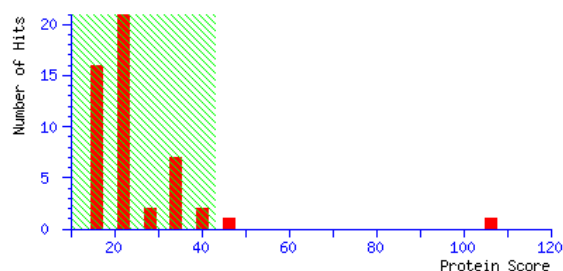

Matched peptide sequences: shown in **Bold Red**:

```
1 MDGTSEATWP EILGSRNWDN LLDPLDLSLR KLILRCGDFC QATYDAFNND
51 QNSRYCGTSR YGKRNFHFKV MLDNPNYQV SSFLYATARV SLPEAFLLHS
101 LSRDSDRET NWIGYIAVTS DEQTKTLGRR EIYIAFRGTT RNYEVDILG
151 AKLKSAPLL RGATSTTHDQ ESSSSDDDD DKVPKVMLGW LTMYISDDPN
201 SPFTKLSARA QLLAHIKELR ERYKDDLSI IFTGHSLGAS LSILSAFDLV
251 ENGITDIPVS AFVFGSPQVG NKEFNERFNK YPNLKVLIH NKIDVIPHY
301 GRLMGYVYTG IEFIDTRKS PSLKDSKNPS DWHNLQAMLH IVAGWNGEEQ
351 EFELKVKRSL ALVNKSSEFL KDECLVPGIW WVEKNKGMVR NEDGEWVLAP
401 PDEEDLPVPE C
```



Spot No.: **P13**

NCBI accession No.: **gi| 1550740** Species: *Arabidopsis thaliana*

**PFF** score: **[51]**

Protein name: **GDP-associated inhibitor**

Matched peptides No.: **[1]** Sequence coverage %: **[5]**

Matched sequences: **R.FQGGSPYIYPLYGLGELPQAFAR.L;**

Calculated Mr: **50269**

Calculated pI: **5.49**

Probability Based Mowse Score:

Ions score is  $-10 \cdot \log(P)$ , where P is the probability that the observed match is a random event. Individual ions scores  $> 43$  indicate identity or extensive homology ( $p < 0.05$ ). Protein scores are derived from ions scores as a non-probabilistic basis for ranking protein hits.

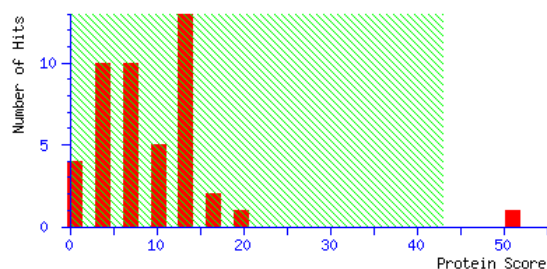

Matched peptide sequences: shown in **Bold Red**:

```
1 MDEEYEVIVL GTGLKECILS GLLSVDGLKV LHMDRNDYYG GESTSLNLNQ
51 LWKKFRGEEK APAHLGSSRD YNVDMMPKFM MANGKLVRLV IHTDVTKYLS
101 FKAVDGSYVF VQGVQKQVPA TPMEALKSPL MGIFEKRRAG KFFSYVQEYD
151 EKDPKTHDGM DLRRVTTKDL IAKFGLKEDT IDFIGHAVAL HCNDNHLHQP
201 AYDVTMRMKL YAESLARFQG GSPYIYPLYG LGELPQAFAR LSAVYGGTYM
251 LNKPECKVEF DEEGKVSGVT SEGETAKCKK VVCDPSYLTN KVRKIGRVAR
301 AIAIMSHPIP NTNDSQSVQV ILPQQLGRK SDMYVFCCSY SHNVAPKGKF
351 IAFVSTDAET DNPQTELQPG IDLLGPVDEL FFDIYDRYEP VNEPTLDNCF
401 ISTSYDATTH FDTTVVDVLN MYKLITGKEL DLSVDLNPAS AAEEE
```

Spot No.: **P14**

NCBI accession No.: **gi| 255552291** Species: *Ricinus communis*

**PFF** score: **[144]**

Protein name: **short chain dehydrogenase, putative**

Matched peptides No.: **[3]** Sequence coverage %: **[11]**

Matched sequences: **K.VALVTGGDSGIGR.A;**

**K.AEGAKDPIAIPTDVGFEEENCR.K;**

**K.DPIAIPTDVGFEEENCR.K**

Calculated Mr: **32148**

Calculated pI: **6.50**

Probability Based Mowse Score:

Ions score is  $-10 \cdot \log(P)$ , where P is the probability that the observed match is a random event. Individual ions scores  $> 45$  indicate identity or extensive homology ( $p < 0.05$ ). Protein scores are derived from ions scores as a non-probabilistic basis for ranking protein hits.

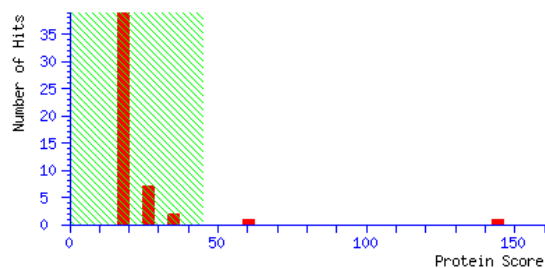

Matched peptide sequences: shown in **Bold Red**:

```
1 MATRRGYRFP PQSQDKQPGK EYLMHPLPEF INPHYKPSNK LQDKVALVTG
51 GDSGIGRAVS YYFTLEGATV AFTYVKGRED KDKDHILKIL HEVKAEGAKD
101 PIAIPTDVGF EENCRKVIDQ IMSEYGKIDI LVNNAGEAHY STTIEDITDP
151 MLERVFRTNI FGHHFMSRHA LKHMKEGGCI INTASVAAYA GFSFMVDYSS
201 TKGAVVAFTR SLALQLIDRG IRVNAVAPGS VWTFFQPSTL SAEQVAQVGS
251 GVPMDRAAQP YEIAPSFVFL ASNDCSSYFT GQVLHPNGMF
```

Spot No.: **P15**

NCBI accession No.: **gi| 218157** Species: *Oryza sativa*

**PFF** score: **[174]**

Protein name: **cytoplasmic aldolase**

Matched peptides No.: **[2]**

Sequence coverage %: **[3]**

Matched sequences: **K.KVAPEVIAEYTVR.T;**

**K.VAPEVIAEYTVR.T;**

Calculated Mr: **39151**

Calculated pI: **6.56**

Probability Based Mowse Score:

Ions score is  $-10 \cdot \log(P)$ , where P is the probability that the observed match is a random event. Individual ions scores  $> 45$  indicate identity or extensive homology ( $p < 0.05$ ). Protein scores are derived from ions scores as a non-probabilistic basis for ranking protein hits.

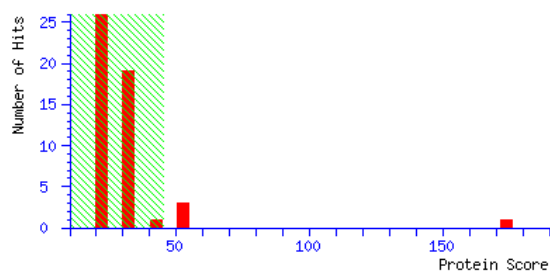

Matched peptide sequences: shown in **Bold Red**:

```
1 MSAYCGKYKD ELIKNAAYIG TPGKGILAAD ESTGTIGKRF ASINVENVED
51 NRRAFRELLF CTPGALQYIS GVILFDETLY QKTKDGKPFV DILKEAGALP
101 GIKVDKGTIE VAGTDKETT QGHDDLKQC AKYYEAGARF AKWRAVLKIG
151 PNQPSQLAID LNAQGLACYA IICQENGLVP IVEPEILVDG PHDIDRCAYV
201 SEVVLAACYK ALNEHHVLE GTLLKPNMVT PGSDAKKVAP EVIAEYTVRT
251 LQRTVPPAVP AIVFLSGGQS EEEATLNLNA MNKLSAKKPW SLSFSFGRAL
301 QQSTLKAWAG KTENVEKARA AFLVRCKANS EATLGTYKGD AVLGEGAAES
351 LHVVDYKY
```

Spot No.: **P16**

NCBI accession No.: **gi| 218157** Species: *Oryza sativa Japonica Group*

**PFF** score: **[125]**

Protein name: **cytoplasmic aldolase**

Matched peptides No.: **[2]**

Sequence coverage %: **[3]**

Matched sequences: **K.KVAPEVIAEYTVR.T;**

**K.VAPEVIAEYTVR.T;**

Calculated Mr: **39151**

Calculated pI: **6.56**

Probability Based Mowse Score:

Ions score is  $-10 \cdot \log(P)$ , where P is the probability that the observed match is a random event. Individual ions scores  $> 45$  indicate identity or extensive homology ( $p < 0.05$ ). Protein scores are derived from ions scores as a non-probabilistic basis for ranking protein hits.

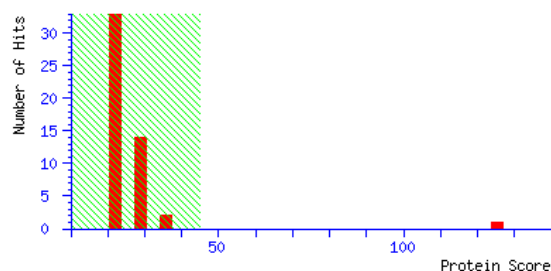

Matched peptide sequences: shown in **Bold Red**:

```
1 MSAYCGKYKD ELIKNAAYIG TPGKGILAAD ESTGTIGKRF ASINVENVED
51 NRRAFRELLF CTPGALQYIS GVILFDEPLY QKTKDGKPFV DILKEAGALP
101 GIKVDKGTIE VAGTDKETT QGHDDLKQC AKYYEAGARF AKWRAVLKIG
151 PNQPSQLAID LNAQGLACYA IICQENGLVP IVEPEILVDG PHDIDRCAYV
201 SEVLAACYK ALNEHHVLE GTLLKPNMVT PGSDAKKVAP EVIAEYTVRT
251 LQRTVPPAVP AIVFLSGGQS EEEATLNLNA MNKLSAKKPW SLSFSFGRAL
301 QQSTLKAWAG KTENVEKARA AFLVRCKANS EATLGTYKGD AVLGEAAES
351 LHVVDYKY
```

Spot No.: **P17**

NCBI accession No.: **gi| 14423933** Species: *Hevea brasiliensis*

**PFF** score: **[171]**

Protein name: **Small rubber particle protein**

Matched peptides No.: **[3]**

Sequence coverage %: **[19]**

Calculated Mr: **22331**

Calculated pI: **4.80**

Matched sequences:

| Query              | Start - End | Observed  | Mr(expt)  | Mr(calc)  | ppm  | M Score | Expect  | Rank | U | Peptide               |
|--------------------|-------------|-----------|-----------|-----------|------|---------|---------|------|---|-----------------------|
| <a href="#">#1</a> | 36 - 53     | 1881.1389 | 1880.1316 | 1880.0255 | 56.4 | 1 86    | 3.3e-06 | 1    | U | K.DISGPKPGVDTIENVVK.T |
| <a href="#">#2</a> | 134 - 143   | 1236.7086 | 1235.7013 | 1235.6299 | 57.8 | 0 61    | 0.0016  | 1    | U | K.AEQYAVITWR.A        |
| <a href="#">#3</a> | 183 - 194   | 1346.8149 | 1345.8076 | 1345.7493 | 43.3 | 0 25    | 6.5     | 1    | U | R.VSSYLPLLPTK.I       |

Probability Based Mowse Score:

Ions score is  $-10 \cdot \log(P)$ , where P is the probability that the observed match is a random event. Individual ions scores  $> 45$  indicate identity or extensive homology ( $p < 0.05$ ). Protein scores are derived from ions scores as a non-probabilistic basis for ranking protein hits.

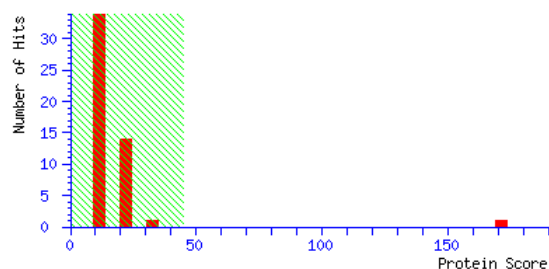

Matched peptide sequences: shown in **Bold Red**:

```
1 MAEEVEEERL KYLDFVRAAG VYAVDSFSTL YLYAKDISGP LKPGVDTIEN
51 VVKTVVTPVY YIPLEAVKfV DKTVDVSVTS LDGVVPPVIK QVSAQYTSVA
101 QDAPRIVLDV ASSVFNTGVQ EGAKALYANL EPKAEQYAVI TWRALNKLPL
151 VPQVANVVVP TAVYFSEKYN DVVRGTEQG YRVSSYLPLL PTEKITKVFQ
201 DEAS
```

Spot No.: **P18**

NCBI accession No.: [gi| 118489480](#)

Species: *Populus trichocarpa x Populus deltoids*

**PFF** score: **[74]**

Protein name: [unknown](#)

Matched peptides No.: **[2]**

Sequence coverage %: **[3]**

Matched sequences: [R.KLLVALVSAYR.Y](#);

[K.LLVALVSAYR.Y](#)

Calculated Mr: **35859**

Calculated pI: **8.42**

Probability Based Mowse Score:

Ions score is  $-10 \cdot \log(P)$ , where P is the probability that the observed match is a random event. Individual ions scores  $> 45$  indicate identity or extensive homology ( $p < 0.05$ ). Protein scores are derived from ions scores as a non-probabilistic basis for ranking protein hits.

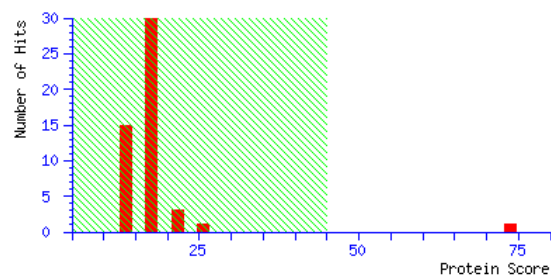

Matched peptide sequences: shown in **Bold Red**:

```
1 MAHLEALAKA FTGLGVDEKS LIENLGKSHP EQRTLFRKKT PQLFIEDERS
51 FERWNDHCVR LLKHEFVRFK NALVLWAMHP WERDARLVKE ALKKG PQSYG
101 VIVEIACRS SEELGARKA YHSLFDQSIE EDVATHIHGS ERKLLVALVS
151 AYRYEGPKVK EDAAKSEAKI LANAIKNGNK KNPIEDEEVI RILSTRSKAH
201 LKVACKHYKE VSGNNIHEDL DPSDLILKET VECLCTPHAY FSKVLDEAMS
251 SNAHKNTKKG LTRVIVTRAD VDMKEIKEEY MNLFGVSLSK KIEEKANGNY
301 RDFLVTLITR DN
```

Spot No.: **P19**

NCBI accession No.: **gi|132270** Species: *Hevea brasiliensis*

**PFF** score: **[341]**

Protein name: **Rubber elongation factor protein**

Matched peptides No.: **[3]** Sequence coverage %: **[19]**

Matched sequences:

| Query              | Start | End | Observed  | Mr(expt)  | Mr(calc)  | ppm | M Score | Expect | Rank    | U | Peptide                  |
|--------------------|-------|-----|-----------|-----------|-----------|-----|---------|--------|---------|---|--------------------------|
| <a href="#">29</a> | 41    | 58  | 1849.2604 | 1848.2531 | 1847.9993 | 137 | 1       | 169    | 1.6e-14 | 1 | U K.DKSGPLQPGVDIIEGPVK.N |
| <a href="#">16</a> | 43    | 58  | 1606.0936 | 1605.0863 | 1604.8774 | 130 | 0       | 121    | 1.3e-09 | 1 | U K.SGPLQPGVDIIEGPVK.N   |
| <a href="#">1</a>  | 59    | 67  | 1045.7102 | 1044.7029 | 1044.5716 | 126 | 0       | 51     | 0.021   | 1 | U K.NVAVPLYNR.F          |

Calculated Mr: **14713**

Calculated pI: **5.04**

Probability Based Mowse Score:

Ions score is  $-10 \cdot \log(P)$ , where P is the probability that the observed match is a random event. Individual ions scores  $> 44$  indicate identity or extensive homology ( $p < 0.05$ ). Protein scores are derived from ions scores as a non-probabilistic basis for ranking protein hits.

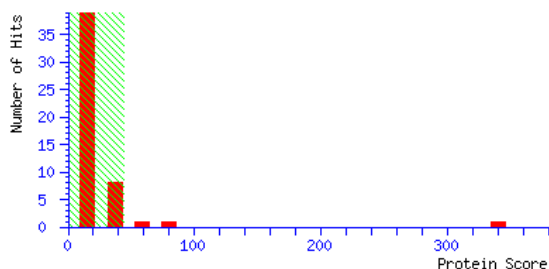

Matched peptide sequences: shown in **Bold Red**:

```
1 MAEDEDNQQG QGEGLKYLGF VQDAATYAVT TFSNVYLFAK DKSGPLQPGV
51 DIIEGPVKNV AVPLYNRFSY IPNGALKFVD STVVASVTII DRSLPPIVKD
101 ASIQVVS AIR AAPEAARSLA SSLPGQTKIL AKVIFYGEN
```

Spot No.: **P20**

NCBI accession No.: **gi|132270** Species: *Hevea brasiliensis*

**PFF** score: **[597]**

Protein name: **Rubber elongation factor protein**

Matched peptides No.: **[16]** Sequence coverage %: **[38]**

Matched sequences:

| Query              | Start - End | Observed  | Mr(expt)  | Mr(calc)  | ppm  | M | Score | Expect  | Rank | U | Peptide               |
|--------------------|-------------|-----------|-----------|-----------|------|---|-------|---------|------|---|-----------------------|
| <a href="#">94</a> | 41 - 58     | 1849.0222 | 1848.0149 | 1847.9993 | 8.46 | 1 | 119   | 1.4e-09 | 1    | U | K.DKSGPLQPGVDIIEGPK.N |
| <a href="#">95</a> | 41 - 58     | 1849.1149 | 1848.1076 | 1847.9993 | 58.6 | 1 | 115   | 4.3e-09 | 1    | U | K.DKSGPLQPGVDIIEGPK.N |
| <a href="#">97</a> | 41 - 58     | 1849.2604 | 1848.2531 | 1847.9993 | 137  | 1 | 169   | 1.6e-14 | 1    | U | K.DKSGPLQPGVDIIEGPK.N |
| <a href="#">68</a> | 43 - 58     | 1606.0936 | 1605.0863 | 1604.8774 | 130  | 0 | 121   | 1.3e-09 | 1    | U | K.SGPLQPGVDIIEGPK.N   |
| <a href="#">2</a>  | 59 - 67     | 1045.5845 | 1044.5772 | 1044.5716 | 5.38 | 0 | 71    | 0.00021 | 1    | U | K.NVAVPLYNR.F         |
| <a href="#">3</a>  | 59 - 67     | 1045.6366 | 1044.6293 | 1044.5716 | 55.3 | 0 | 71    | 0.00023 | 1    | U | K.NVAVPLYNR.F         |
| <a href="#">4</a>  | 59 - 67     | 1045.6639 | 1044.6566 | 1044.5716 | 81.4 | 0 | 68    | 0.00043 | 1    | U | K.NVAVPLYNR.F         |
| <a href="#">5</a>  | 59 - 67     | 1045.7102 | 1044.7029 | 1044.5716 | 126  | 0 | 51    | 0.021   | 1    | U | K.NVAVPLYNR.F         |
| <a href="#">6</a>  | 59 - 67     | 1045.7162 | 1044.7089 | 1044.5716 | 131  | 0 | 77    | 5.8e-05 | 1    | U | K.NVAVPLYNR.F         |
| <a href="#">69</a> | 78 - 92     | 1621.9017 | 1620.8944 | 1620.8723 | 13.6 | 0 | 127   | 2.8e-10 | 1    | U | K.FVDSTVVASVTIIDR.S   |
| <a href="#">70</a> | 78 - 92     | 1621.9749 | 1620.9676 | 1620.8723 | 58.8 | 0 | 43    | 0.077   | 1    | U | K.FVDSTVVASVTIIDR.S   |
| <a href="#">71</a> | 78 - 92     | 1621.9778 | 1620.9705 | 1620.8723 | 60.6 | 0 | 109   | 2e-08   | 1    | U | K.FVDSTVVASVTIIDR.S   |
| <a href="#">18</a> | 100 - 110   | 1158.6577 | 1157.6504 | 1157.6404 | 8.64 | 0 | 80    | 2.3e-05 | 1    | U | K.DASIQVVS AIR.A      |
| <a href="#">19</a> | 100 - 110   | 1158.7130 | 1157.7057 | 1157.6404 | 56.4 | 0 | 85    | 6.8e-06 | 1    | U | K.DASIQVVS AIR.A      |
| <a href="#">21</a> | 100 - 110   | 1158.7190 | 1157.7117 | 1157.6404 | 61.6 | 0 | 56    | 0.0056  | 1    | U | K.DASIQVVS AIR.A      |
| <a href="#">23</a> | 100 - 110   | 1158.7994 | 1157.7921 | 1157.6404 | 131  | 0 | 103   | 1e-07   | 1    | U | K.DASIQVVS AIR.A      |

Calculated Mr: **14713**

Calculated pI: **5.04**

Probability Based Mowse Score:

Ions score is  $-10 \cdot \log(P)$ , where P is the probability that the observed match is a random event. Individual ions scores  $> 45$  indicate identity or extensive homology ( $p < 0.05$ ). Protein scores are derived from ions scores as a non-probabilistic basis for ranking protein hits.

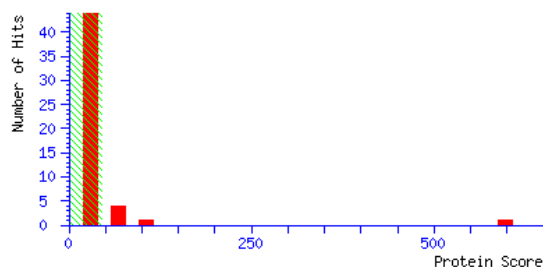

Matched peptide sequences: shown in **Bold Red**:

1 MAEDEDNQQG QGEGLKYLGF VQDAATYAVT TFSNVYLFAK **DKSGPLQPGV**  
51 **DIIEGPKNV** AVPLYNRFSY IPNGALKFVD **STVVASVTII** DRSLPPIVKD  
101 **ASIQVVS AIR** AAPEAARSLA SSLPGQTKIL AKVIFYGEN



Spot No.: **P21**

NCBI accession No.: **gi|132270** Species: *Hevea brasiliensis*

PFF score: **[672]**

Protein name: **Rubber elongation factor protein**

Matched peptides No.: **[23]** Sequence coverage %: **[46]**

Matched sequences:

| Query                | Start - End | Observed  | Mr (expt) | Mr (calc) | ppm  | M | Score | Expect  | Rank     | U | Peptide               |
|----------------------|-------------|-----------|-----------|-----------|------|---|-------|---------|----------|---|-----------------------|
| <a href="#">#134</a> | 41 - 58     | 1849.0222 | 1848.0149 | 1847.9993 | 8.46 | 1 | 119   | 1.9e-09 | <u>1</u> | U | K.DKSGPLQPGVDIIEGPK.N |
| <a href="#">#135</a> | 41 - 58     | 1849.0710 | 1848.0637 | 1847.9993 | 34.9 | 1 | 148   | 2.9e-12 | <u>1</u> | U | K.DKSGPLQPGVDIIEGPK.N |
| <a href="#">#136</a> | 41 - 58     | 1849.0801 | 1848.0728 | 1847.9993 | 39.8 | 1 | 157   | 3.4e-13 | <u>1</u> | U | K.DKSGPLQPGVDIIEGPK.N |
| <a href="#">#137</a> | 41 - 58     | 1849.1149 | 1848.1076 | 1847.9993 | 58.6 | 1 | 115   | 5.9e-09 | <u>1</u> | U | K.DKSGPLQPGVDIIEGPK.N |
| <a href="#">#139</a> | 41 - 58     | 1849.2604 | 1848.2531 | 1847.9993 | 137  | 1 | 169   | 2.3e-14 | <u>1</u> | U | K.DKSGPLQPGVDIIEGPK.N |
| <a href="#">#100</a> | 43 - 58     | 1605.9473 | 1604.9400 | 1604.8774 | 39.0 | 0 | 128   | 3.3e-10 | <u>1</u> | U | K.SGPLQPGVDIIEGPK.N   |
| <a href="#">#101</a> | 43 - 58     | 1606.0936 | 1605.0863 | 1604.8774 | 130  | 0 | 121   | 1.8e-09 | <u>1</u> | U | K.SGPLQPGVDIIEGPK.N   |
| <a href="#">#5</a>   | 59 - 67     | 1045.5845 | 1044.5772 | 1044.5716 | 5.38 | 0 | 71    | 0.00023 | <u>1</u> | U | K.NVAVPLYNR.F         |
| <a href="#">#6</a>   | 59 - 67     | 1045.6366 | 1044.6293 | 1044.5716 | 55.3 | 0 | 71    | 0.00026 | <u>1</u> | U | K.NVAVPLYNR.F         |
| <a href="#">#7</a>   | 59 - 67     | 1045.6639 | 1044.6566 | 1044.5716 | 81.4 | 0 | 68    | 0.00048 | <u>1</u> | U | K.NVAVPLYNR.F         |
| <a href="#">#8</a>   | 59 - 67     | 1045.7102 | 1044.7029 | 1044.5716 | 126  | 0 | 51    | 0.023   | <u>1</u> | U | K.NVAVPLYNR.F         |
| <a href="#">#9</a>   | 59 - 67     | 1045.7162 | 1044.7089 | 1044.5716 | 131  | 0 | 77    | 6.5e-05 | <u>1</u> | U | K.NVAVPLYNR.F         |
| <a href="#">#102</a> | 78 - 92     | 1621.6825 | 1620.6752 | 1620.8723 | -122 | 0 | 49    | 0.024   | <u>1</u> | U | K.FVDSTVVASVTIIDR.S   |
| <a href="#">#103</a> | 78 - 92     | 1621.9017 | 1620.8944 | 1620.8723 | 13.6 | 0 | 127   | 3.8e-10 | <u>1</u> | U | K.FVDSTVVASVTIIDR.S   |
| <a href="#">#104</a> | 78 - 92     | 1621.9475 | 1620.9402 | 1620.8723 | 41.9 | 0 | 95    | 6.1e-07 | <u>1</u> | U | K.FVDSTVVASVTIIDR.S   |
| <a href="#">#105</a> | 78 - 92     | 1621.9749 | 1620.9676 | 1620.8723 | 58.8 | 0 | 43    | 0.1     | <u>1</u> | U | K.FVDSTVVASVTIIDR.S   |
| <a href="#">#106</a> | 78 - 92     | 1621.9778 | 1620.9705 | 1620.8723 | 60.6 | 0 | 109   | 2.7e-08 | <u>1</u> | U | K.FVDSTVVASVTIIDR.S   |
| <a href="#">#30</a>  | 100 - 110   | 1158.6577 | 1157.6504 | 1157.6404 | 8.64 | 0 | 80    | 2.7e-05 | <u>1</u> | U | K.DASIQVVS AIR.A      |
| <a href="#">#31</a>  | 100 - 110   | 1158.7063 | 1157.6990 | 1157.6404 | 50.6 | 0 | 110   | 2.5e-08 | <u>1</u> | U | K.DASIQVVS AIR.A      |
| <a href="#">#32</a>  | 100 - 110   | 1158.7130 | 1157.7057 | 1157.6404 | 56.4 | 0 | 85    | 7.9e-06 | <u>1</u> | U | K.DASIQVVS AIR.A      |
| <a href="#">#34</a>  | 100 - 110   | 1158.7190 | 1157.7117 | 1157.6404 | 61.6 | 0 | 56    | 0.0065  | <u>1</u> | U | K.DASIQVVS AIR.A      |
| <a href="#">#36</a>  | 100 - 110   | 1158.7994 | 1157.7921 | 1157.6404 | 131  | 0 | 103   | 1.2e-07 | <u>1</u> | U | K.DASIQVVS AIR.A      |
| <a href="#">#18</a>  | 118 - 128   | 1088.6615 | 1087.6542 | 1087.5873 | 61.5 | 0 | 61    | 0.0021  | <u>1</u> | U | R.SLASSLPQGTK.I       |

Calculated Mr: **14713**

Calculated pI: **5.04**

Probability Based Mowse Score:

Ions score is  $-10 \cdot \log(P)$ , where P is the probability that the observed match is a random event. Individual ions scores  $> 46$  indicate identity or extensive homology ( $p < 0.05$ ). Protein scores are derived from ions scores as a non-probabilistic basis for ranking protein hits.

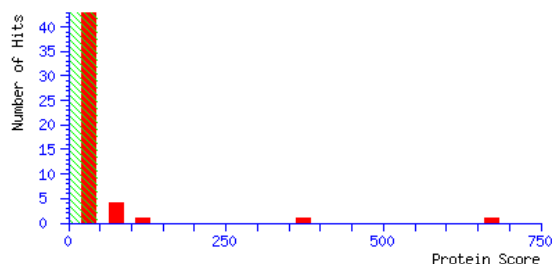

Matched peptide sequences: shown in **Bold Red**:

1 MAEDEDNQQG QEGGLKYLGF VQDAATYAVT TFSNVYLFAK **DKSGPLQPGV**  
51 **DIIEGPKNV AVPLYNRFSY IPNGALKFVD STVVASVTII DRSLPPIVKD**  
101 **ASIQVVS AIR AAPEAARSLA SSLPGQTKIL AKVIFYGEN**

Spot No.: **P22**

NCBI accession No.: **gi|38154482** Species: *Nicotiana benthamiana*

**PFF** score: **[197]**

Protein name: **molecular chaperone Hsp90-1**

Matched peptides No.: **[5]** Sequence coverage %: **[8]**

Matched sequences: **K.ADLVNNLGTIAR.S;**

**K.HNDDEQYVWESQAGGSFTVTR.D;**

**K.RAPFDLFDTR.K;**

**R.APFDLFDTR.K;**

**K.GIVDSEDPLNISR.E**

Calculated Mr: **80340**

Calculated pI: **4.94**

Probability Based Mowse Score:

Ions score is  $-10 \cdot \log(P)$ , where P is the probability that the observed match is a random event. Individual ions scores  $> 45$  indicate identity or extensive homology ( $p < 0.05$ ). Protein scores are derived from ions scores as a non-probabilistic basis for ranking protein hits.

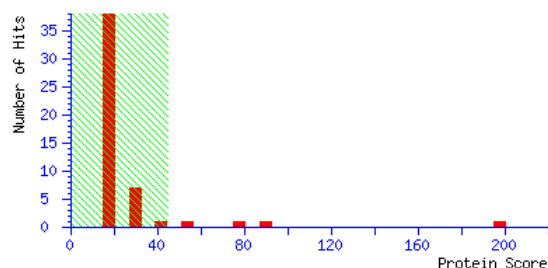

Matched peptide sequences: shown in **Bold Red**:

```
1 MAEAETFAFQ AEINQLLSLI INTFYSNKEI FLRELISNSS DALDKIRFES
51 LTDKSKLDAQ PELFIHIIPD KTNNSLTIID SGIGMTKADL VNNLGTIARS
101 GTKEFMEALA AGADVSMIGQ FGVGFYSAYL VAEKVIVITK HNDDEQYVWE
151 SQAGGSFTVT RDTSGDNLGR GTKITLFLKE DQLEYLEERR LKDLIKHHSE
201 FISYPISLWV EKTIEKEISD DEEEEEKKDE EGKVEEVDEE KEKEEKKKKK
251 VKEASNEWSL VNKQKPIWMR KPDEITKEEY AAFYKSLTND WEEHLAVKHF
301 SVEGQLEFKA ILFVPKRAPF DLFDTRKKPN NIKLYVRRVF IMDNCEELIP
351 EYLSFVKGIV DSEDPLNIS REMLQQNKIL KVIRKNLVKK CVELFFEIAE
401 NKEDYDKFYE AFSKNLKLGI HEDSQNRSKF AELLRYHSTK SGDEMTSLKD
451 YVTRMKEGQN DIYYITGESK KAVENSPFLE KLKKKGYEVL YMVDAIDEYS
501 IGQLKEFEGK KLVSATKEGL KLDESEDEKK KQEELKEKFE GLCKVIKDVL
551 GDKVEKVVVS DRVVDSPCCL VTGEYGWTAN MERIMKAQAL RDSSMAGYMS
601 SKKTMEINPE NAIMEELRKR ADADKNDKSV KDLVLLLFET ALLTSGFSLE
651 EPNTFGNRIH RMLKLGLSID DDSGDADVDM PALEDAEADA EGSKMEEVD
```

Spot No.: **P23**

NCBI accession No.: **gi| 1708314** Species: *Ipomoea nil*

**PFF** score: **[126]**

**Protein name:** RecName: Full=Heat shock protein 83

Matched peptides No.: **[5]**

Sequence coverage %: **[8]**

Matched sequences: **K.LDAQPELFI**.L;

**K.ADLVNNLG**TIAR.S;

**K.ITLFLKEDQLEY**LEER.R;

**K.RAPFDLFD**TR.K;

**K.LGIHEDS**QNR.A

Calculated Mr: **81055**

Calculated pI: **4.95**

Probability Based Mowse Score:

Ions score is  $-10 \cdot \log(P)$ , where P is the probability that the observed match is a random event. Individual ions scores  $> 46$  indicate identity or extensive homology ( $p < 0.05$ ). Protein scores are derived from ions scores as a non-probabilistic basis for ranking protein hits.

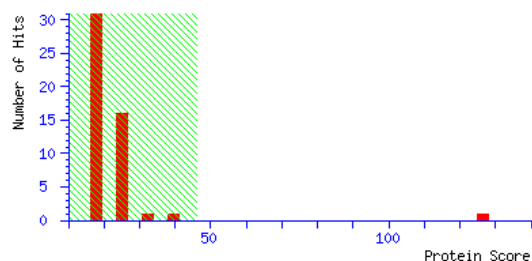

Matched peptide sequences: shown in **Bold Red**:

```
1  MADVQMAEAE TFAFQAEINQ LLSLIINTFY SNKEIFLREL ISNASDALDK
51  IRFESLTDKS KLDAQPELFI RLVPDKTKT LSIIDSGVGM AKADLVNNLG
101 TIARSGTKEF MEALQAGADV SMIGQFGVGF YSAYLVAEKV IVTTKHNDDE
151 QYIWESQAGG SFTVTRDVDG EQLGRGKIT LFLKEDQLEY LEERRIKDLV
201 KKHSEFISYP IYLWTEKTTE KEISDDEDE PKKEEEDIE EVDEDKEKEG
251 KKKKKIKEVS HEWQLINKQK PIWLRKPEEI TKEEYASFYK SLTNDWEDHL
301 AVKHFSVEGQ LEFKAILFVP KRAPFDLFDT RKKMNNIKLY VRRVFIMDNC
351 EELIPEYLG FVGVVSDDL PLNISREMLQ QNKILKVIRK NLVKKCIEMF
401 NEIAENKDDY NKFYEAFSKN LKGIHEDSQ NRAKLADLLR YYSTKSGDEL
451 TSLKDYVTRM KEGQKDIYYI TGESKKAVERN SPFLERLKKK GYEVLFMVDA
501 IDEYAVGQLK EYDGKLVSA TKEGLKLEDD DEEEKKKREE KKKSFENLCK
551 IIKDILGDKV EKVVVSDRIV DSPCCLVTGE YGWTANMERI MKAQALRDSS
601 MSSYSSKKT MEINPDNGIM EELRKRAEAD KNDKSVKDLV LLLFETALLT
651 SGFSLDDPNT FGARIHRMLK LGLSIDEEEA GDDADMPALE EEAGEESKME
701  EVD
```

Spot No.: **P24**

NCBI accession No.: **gi| 20559** Species: *Petunia x hybrida*

**PFF** score: **[136]**

Protein name: **hsp70 (AA 6 - 651)**

Matched peptides No.: **[4]**

Sequence coverage %: **[11]**

Matched sequences: **K.NAVVTVPAYFNDSQR.Q;**

**R.TLSSTAQTIEIDSLYEGIDFYSTITR.A;**

**R.ARFEELNMDLFR.K;**

**K.EQVFSTYSDNQPGVLIQVYEGER.A**

Calculated Mr: **71137**

Calculated pI: **5.07**

Probability Based Mowse Score:

Ions score is  $-10 \cdot \log(P)$ , where P is the probability that the observed match is a random event. Individual ions scores  $> 45$  indicate identity or extensive homology ( $p < 0.05$ ). Protein scores are derived from ions scores as a non-probabilistic basis for ranking protein hits.

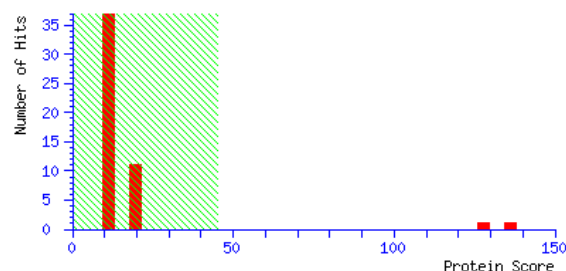

Matched peptide sequences: shown in **Bold Red**:

```
1  EGPAIGIDLG  TTYSCVGVWQ  HDRVEIIAND  QGNRTTPSYV  GFTDTERLIG
51  DAAKNQVAMN  PINTVFDAGR  LIGRRFSDPS  VQSDIKLWPF  KVIPGPGDKP
101 MIVVITYKGE  KQFAAEEISS  MVLTKMKEIA  EAYLGTTIKN  AVVTVPAYFN
151 DSQRQATKDA  GVIAGLNVMR  IINEPTAAAI  AYGLDKKASS  AGEKNVLIFD
201 LGGGTFDVSL  LTIEEGIFEV  KATAGDTHLG  GEDFDNRMVN  HFVQEFKRKN
251 KKDISGNPRA  LRRLRTACER  AKRTLSTAQ  TTIEIDSLYE  GIDFYSTITR
301 ARFEELNMDL  FRKCEPVEK  CLRDAKMDKS  SVHDVVLVGG  STRIPKVQQL
351 LQDFFNKEL  CKSINPDEAV  AYGAAVQAAI  LSGEGNEKVQ  DLLLLDVTPL
401 SLGLETAGGG  MTVLIPRNTT  IPTKKEQVFS  TYSDNQPGVL  IQVYEGERAR
451 TKDNNLLGKF  ELSGIPPAPR  GVPQITVCFD  IDANGILNVS  AEDKTTGQKN
501 KITITNDKGR  LSKEEIERMV  QEAEKYKSED  EELKKKVEAK  NALENYAYNM
551 RNTIKDDKIN  SQLSAADKKR  IEDAIDEAIK  WLDNNQLAEA  DEFEDKMKEL
601 ESICNPPIAK  MYQGGAGGAT  MDEDGPSVGG  SAGSQTGAGP  KIEEVD
```

Spot No.: **P25**

NCBI accession No.: **gi| 255566038** Species: *Ricinus communis*

**PFF** score: **[118]**

Protein name: **Phospholipase C 3 precursor, putative**

Matched peptides No.: **[2]** Sequence coverage %: **[4]**

Matched sequences: **K.TVVVLVQENR.S;**

**K.HCEKGELPNYVVIEPR.Y**

Calculated Mr: **59111**

Calculated *pl*: **5.08**

Probability Based Mowse Score:

Ions score is  $-10 \cdot \log(P)$ , where *P* is the probability that the observed match is a random event.

Individual ions scores  $> 45$  indicate identity or extensive homology ( $p < 0.05$ ).

Protein scores are derived from ions scores as a non-probabilistic basis for ranking protein hits.

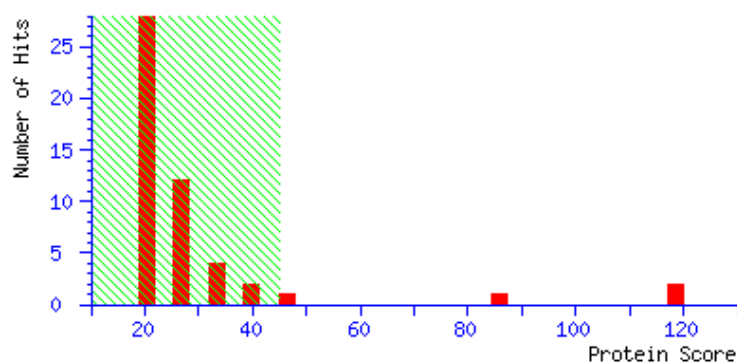

Matched peptide sequences: shown in **Bold Red**:

```
1  MAAESSTSAN  EYPIKTVVVL  VQENRSFDHM  LGWLKTLNPE  IDGVTGQESN
51  PISTSDLNSS  LVFFRDQAAY  VDPDPGHSIQ  AIYEQVFGVE  WTEAALSSSEN
101 AVSPKMNGFA  QNAERTQQGM  AETVMNGFRP  EAVPVYKELA  MNFAVCDRWF
151 ASIPTSTQPN  RLYLHSATSH  GATSNDTKML  AEGFPQKTIF  ESMHEAGFSF
201 GIYFQQVPTT  LFYRNLRKIK  YLKNFHQFDL  QFKKHCEKGE  LPNYVVIEPR
251 YYDLLSIPAN  DDHPSHDVSE  GQKFVKEVYE  ALRASPQWNE  MLFIIIIYDEH
301 GGFYDHVPTP  ATGIPTPDDI  VGPAPYLFKF  DRLGVRVPAV  LISPWIEPGT
351 VLHGPSGPQE  TSEFEHSSIA  ATVKKLFNLK  EFLTKRDEWA  GTFESVLTRT
401 SPRIDCPVTL  TEPVKLRSRG  ANEEANISEF  QQELVQLAAV  LNGDHGTDIY
451 PHKLVESMKV  SEAANYVENA  FKRFEYEEYEK  ARDGGVDESE  VIALVKTEAL
501 AIITNTSASS  KSFIQKLFSC  IVCDN
```

Spot No.: **P26**

NCBI accession No.: **gi| 4235430** Species: *Hevea brasiliensis*

**PFF** score: **[80]**

Protein name: **latex-abundant protein**

Matched peptides No.: **[3]** Sequence coverage %: **[9]**

Matched sequences: **R.SAEPGDLLFVHYSGHGTRL**;

**R.EFVDQVPHGCR**.I;

**K.QTIQDAFESR**.G

Calculated Mr: **46443**

Calculated pI: **5.01**

Probability Based Mowse Score:

Ions score is  $-10 \cdot \log(P)$ , where P is the probability that the observed match is a random event. Individual ions scores  $> 45$  indicate identity or extensive homology ( $p < 0.05$ ). Protein scores are derived from ions scores as a non-probabilistic basis for ranking protein hits.

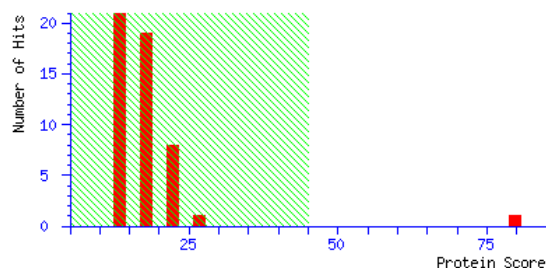

Matched peptide sequences: shown in **Bold Red**:

```
1  MAKKAVLIGI  NYPGTKAELK  GCINDVKRMY  RCLVDRYGFS  EEDITVLIDI
51  DESYIQPTGK  NIRRVLTDLV  RSAEPGDLLF  VHYSGHGTRL  PAETGEDDDT
101  GFDECIVPCD  MNLITDDDFR  EFVDQVPHGC  RITVVSDSCH  SGGLIDEAKE
151  QIGESTKRKE  EEESGFGFK  SFLKQTIQDA  FESRGVHLPS  DLHHHHGHRD
201  EEDFDNRVVE  EDYGDSGYVK  SKSLPLSTLI  EILKQKTGKD  DIDVGKLRPT
251  LFDMFGDDAS  PKVKKFMKVI  LNKLRHGDGE  SGGGGFLGMV  GSLAQEFLKH
301  KLDENDESIV  KPALETEVDS  KQEVYAGTK  RSLPDGGILI  SGCQTDQISA
351  DASPSGKSSE  AYGALSNAIQ  TIIAETDGAV  TNQELVLKAR  KMLKKQGFTQ
401  KPGLYCSDDH  VEASFVC
```

Spot No.: **P27**

NCBI accession No.: **gi| 297833008** Species: *Arabidopsis lyrata subsp. Lyrata*

**PFF** score: **[53]**

Protein name: **phosphoesterase family protein**

Matched peptides No.: **[2]**

Sequence coverage %: **[3]**

Matched sequences: **K.TVVVLVQENR.S;**

**K.LPNYVVIEPR.Y**

Calculated Mr: **59395**

Calculated pI: **5.21**

Probability Based Mowse Score:

Ions score is  $-10 \cdot \log(P)$ , where P is the probability that the observed match is a random event. Individual ions scores  $> 45$  indicate identity or extensive homology ( $p < 0.05$ ). Protein scores are derived from ions scores as a non-probabilistic basis for ranking protein hits.

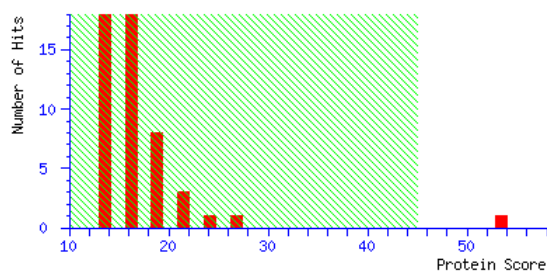

Matched peptide sequences: shown in **Bold Red**:

```
1 MGEETSSGGG SSSSPIKTVV VLVQENRSFD HMLGWFKELN PEIDGVSESE
51 PRSNPISTSD PNSAQVFFGK ESQNIDPDG HSFQAIYEQV FGKPFSDSP
101 YPYPKMNGFV QNAEAITKGM SEKVVMQGFV PEKLPVFKEL VQEFVAVCDRW
151 FSSLPSSTQP NRLYVHAATS NGAFSNDTNT LVRGFPQRTV FESLEESGFT
201 FGIYYQSFPN CLFYRNMRKL KYVDNFHQYH LSFKRHCKEG KLPNYVVIEP
251 RYFNILSAPA NDDHPKNDVA EGQNLVKEIY EALRASPQWN QILFVVVYDE
301 HGGYYDHSVPT PVTGVPNPDG LVGPEPYNFK FDRLGVRVPA LLISPWIEPK
351 TVLHEPNGPE PTSQFEHSSI PATLKKIFNL KSFLTKRDEW AGTFDAVINR
401 TSPRTDCPVT LPELPRARDI DIETQEDED LTDFQIELIQ AAVALNGDHI
451 KDIYPFKLAD NMKVLDAARY VEEAFTRFHG ESKKAKEGGL DEHEIVDLSK
501 GSTRHSSPKS FVQKFFSCLI CDN
```



Spot No.: **P28**

NCBI accession No.: **gi| 226530579** Species: *Zea mays*

**PFF** score: **[108]**

Protein name: **uncharacterized protein LOC100272911**

Matched peptides No.: **[4]** Sequence coverage %: **[11]**

Matched sequences: **K.NAVITVPAYFNDSQR.Q;**

**R.IINEPTAAAIAAYGLDKK.A;**

**K.ATAGDTHLGGEDFDNR.L;**

**K.SQIHDVVLVGGSTR.I**

Calculated Mr: **62054**

Calculated *pI*: **5.23**

Probability Based Mowse Score:

Ions score is  $-10 \cdot \log(P)$ , where *P* is the probability that the observed match is a random event. Individual ions scores > 45 indicate identity or extensive homology ( $p < 0.05$ ). Protein scores are derived from ions scores as a non-probabilistic basis for ranking protein hits.

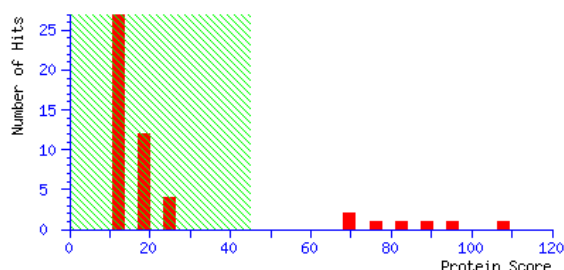

Matched peptide sequences: shown in **Bold Red**:

```
1 MKMWPFKVVP GPADKPMIVV TYKGEEKKFS AEEISSMVLV KMKEIAEAYL
51 STTIKNAVIT VPAYFNDSQR QATKDAGVIA GLNVTRIIINE PTAAAIAAYGL
101 DKKATSTGEK NVLIFDLGGG TFDVSILTIE EGIFEVKATA GDTHLGGEDF
151 DNRLVNHFVM EFKRKHKKDI SGNPRALRRL RTACERAKRT LSSTAQTIE
201 IDSLYEGIDF YATITRARFE ELNMDLFRKC MEPVEKCLRD AKMDKSQIHD
251 VVLVGGSTRI PKVQQLLQDF FNGKELCKSI NPDEAVAYGA AVQAAILSGE
301 GNQKVQDLLL LDVTPLSLGL ETAGGVMTVL IPRNTTIPTK KEQVFSTYSD
351 NQPGVLIQVY EGERTRTKDN NLLGKFELTG IPPAPRGVPQ INVTFDIDAN
401 GILNVSAEDK TTGKKNKITI TNDKGRLSKE EIERMVQEAE KYKTEDEEVK
451 RKVEARNALE NYAYNMRNTV RDEKIASKLP ADDKKKIEDT IEDAIKWLDG
501 NQLAEAEFE DKMKELESIC NPIISQMYQG GAGAAGMDED VPGGGAGNGG
551 GSGAGPKIEE VD
```



Spot No.: **P29**

NCBI accession No.: **gi|149938954** Species: *Actinidia chinensis*

**PFF** score: **[133]**

Protein name: **G6PD1**

Matched peptides No.: **[3]** Sequence coverage %: **[7]**

Matched sequences: **R.QGFLQSNEVHIFGYAR.T;**

**R.GGYFDEYGIIR.D;**

**R.YQGVTIPEAYER.L**

Calculated Mr: **59276**

Calculated pI: **6.75**

### Probability Based Mowse Score:

Ions score is  $-10 \cdot \log(P)$ , where P is the probability that the observed match is a random event. Individual ions scores  $> 45$  indicate identity or extensive homology ( $p < 0.05$ ). Protein scores are derived from ions scores as a non-probabilistic basis for ranking protein hits.

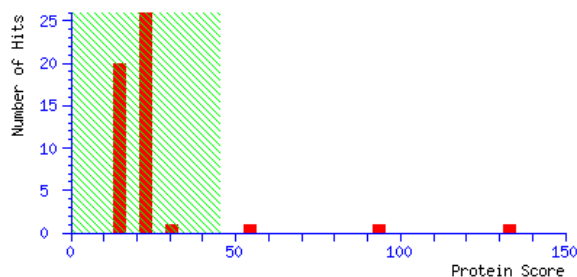

Matched peptide sequences: shown in **Bold Red**:

```
1  MGSGAWTIEK  RSTFRNESFS  KEYVTVSETG  CLSIIVLGAS  GDLAKKKTFF
51  ALFNLYRQGF  LQSNEVHIFG  YARTKISDDE  LRNRIRGYLI  QGSGSSDKQL
101 EEVSKFLQLI  KYISGSYDSG  EGFQLLDKEI  SGYEFKNTV  EGSSRRLFYL
151 ALPPSVYPSV  CKMIKNNCMN  KSDLGGWTRI  VVEKPFKDL  GSAEQLSAQI
201 GELFDEPQIY  RIDHYLGKEL  VQNLLVLRFA  NRFFLPLWNR  DNIANVQIVF
251 REDFGTEGRG  GYFDEYGIIR  DIIQNHLLQV  FCLVAMEKPV  SLKPEHIRDE
301 KVKVLQSVVP  IKDEEVVLGQ  YKGYRDDPTV  PDNSNTPFA  TVVLRVHNER
351 WEGVPFILKA  GKALNSRKA  E  IRIQFKDVPG  DIFKCQKQGR  NEFVIRLQPL
401 EAMYMKLTVK  QPGLEMSTVQ  SELDLSYGQR  YQGVTIPEAY  ERLILDTIRG
451 DQQHFVRRDE  LKAWEIFTP  LLHRIDDGEV  KPLTYQLGSR  GPAEADQLE
501 RAGYVQTHGY  IWIPPTL
```

Spot No.: **P30**

NCBI accession No.: **gi|226493285** Species: *Zea mays*

**PFF** score: **[53]**

Protein name: **flavonol 4-sulfotransferase**

Matched peptides No.: **[12]** Sequence coverage %: **[38]**

Matched sequences: **-.MAAAACNPVAPSGVPFK.D;-.MAAAACNPVAPSGP**

**VPFKDVDDGSVPEHTPK.E;M.AAAACNPVAPSGVPVF;K.DR.LYQGFWLPEHWVPGTIVFQ**  
**R.R;R.LYQGFWLPEHWVPGTIVFQRR.F;K.ALAFATAAR.T;R.LAEFMGR.P + Oxidation (M);**  
**R.PFSAAEEAAGDVAAVVELCSFDEM;K.G + Oxidation (M);R.YRPMR.D;K.GVAGDWANH**  
**MPPEMAAR.L + 2 Oxidation (M);K.GVAGDWANHMTPEMAARLDGIFR.E;K.LQGTGLIFS.-**

Calculated Mr: **38183**

Calculated pI: **6.26**

Probability Based Mowse Score:

Protein score is  $-10 \cdot \log(P)$ , where P is the probability that the observed match is a random event. Protein scores greater than 73 are significant ( $p < 0.05$ ).

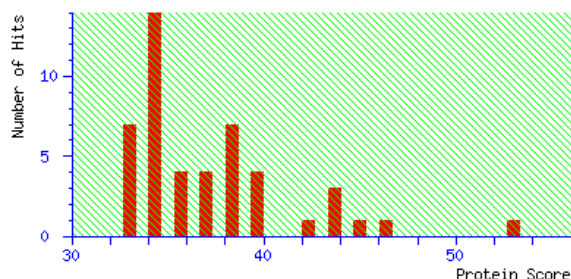

Matched peptide sequences: shown in **Bold Red**:

**1 MAAACNPVA PSGVPFKDV DDGSVPEHTP KEEFGDLVAA LPSRQQSILE**  
**51 LRLYQGFWLP EHWVPGTIVF QRRFTPRPDD VILASYPKCG TTWLKALAF**  
**101 TAARTAYPPG GARHPLRRLN PHDCVPFIDE IFASGEEAKL EALPSRPLMN**  
**151 THLPYALLPA PVTATATGCR VAYVCRDPKD MVVSLWHFLR RAKPDLLFAD**  
**201 TFESVCDGTV VVGVPWDHVL SYWRASVAAP DRALFLRYED MLRDPGGNVR**  
**251 RLAEFMGRPF SAAEEAAGDV AAVVELCSFD EMKGLEVNRP GSGTAGRYRP**  
**301 MPRDAFFRKG VAGDWANHMT PEMAARLDGI FREKLQGTGL IFS**

Spot No.: **P31**

NCBI accession No.: **gi|224071449** Species: *Populus trichocarpa*

**PFF** score: **[104]**

Protein name: **predicted protein**

Matched peptides No.: **[2]**

Sequence coverage %: **[2]**

Matched sequences: **K.NKIDVIPHYPGR.L;**

**K.IDVIPHYPGR.L**

Calculated Mr: **47121**

Calculated pl: **5.28**

Probability Based Mowse Score:

Ions score is  $-10 \cdot \log(P)$ , where P is the probability that the observed match is a random event. Individual ions scores  $> 45$  indicate identity or extensive homology ( $p < 0.05$ ). Protein scores are derived from ions scores as a non-probabilistic basis for ranking protein hits.

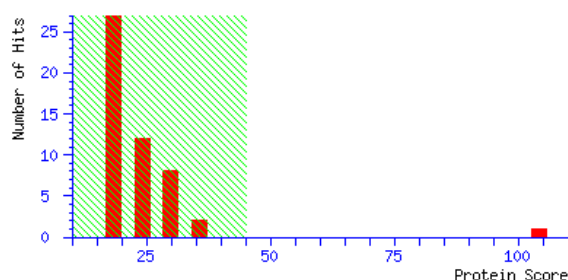

Matched peptide sequences: shown in **Bold Red**:

```
1 MDGTSEATWP EILGSRNWDN LLDPLDLSLR KLILRCGDFC QATYDAFNND
51 QNSRYCGTSR YGKRNFHKV MLDNPENYQV SSFLYATARV SLPEAFLLHS
101 LSRDSWDRET NWIGYIAVTS DEQTKTLGRR EIYIAFRGTT RNYEWDILG
151 AKLKSAPLL RGATSTHDQ ESSSSDDDD DKVPKVMLGW LTMYSISDDPN
201 SPFTKLSARA QLLAHIKELR ERYKDDLSI IFTGHSLGAS LSILSAFDLV
251 ENGITDIPVS AFVFGSPQVG NKEFNERFNK YPNLKVLHIK NKIDVIPHYP
301 GRLMGVYVTG IEFEIDTRKS PSLKDSKNPS DWHNLQAMLH IVAGWNGEEQ
351 EFELKVKRSL ALVNKSSSEFL KDECLVPGIW WVEKNKGMVR NEDGEWVLAP
401 PDEEDLPVPE C
```

Spot No.: **P32**

NCBI accession No.: [gi|1916805](#) Species: *Hevea brasiliensis*

PFF score: **[219]**

Protein name: [latex patatin homolog](#)

Matched peptides No.: **[5]** Sequence coverage %: **[21]**

Matched sequences: [K.LQDL DGP DAR.I](#);

[R.DNYDPIHSIGPIYDGEYLR.E](#);

[K.SLDCEDYYLR.I](#);

[R.IQDDTLTGEESGHIATEENLQR.L](#);

[R.INLDTGRLESIPGAPTNEAAIAK.F](#)

Calculated Mr: **43035**

Calculated pI: **5.00**

Probability Based Mowse Score:

Ions score is  $-10 \cdot \log(P)$ , where P is the probability that the observed match is a random event. Individual ions scores  $> 45$  indicate identity or extensive homology ( $p < 0.05$ ). Protein scores are derived from ions scores as a non-probabilistic basis for ranking protein hits.

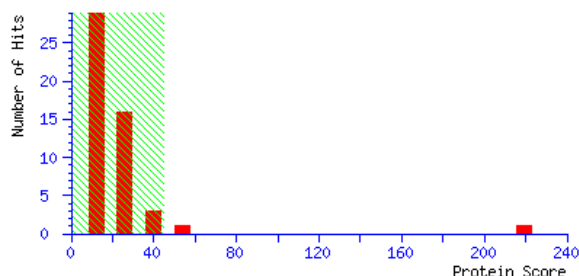

Matched peptide sequences: shown in **Bold Red**:

```
1  MATGSTTLTQ  GKKITVLSID  GGGIRGIIPG  IILASLESKL  QDL DGP DAR I
51  ADYFDIIAGT  STGGLITTML  TAPNEDKKPM  YQAKDIKDFY  LENCPIKFPK
101 ESR DNYDPIH SIGPIYDGEY LRELCNNLLK  DLTVKDTSTD  VIIPTFDIKL
151  LLPVIFPSDD  AKCNALKNAR  LADVCISTSA  APVLLPAHSF  TTEDDKNIHT
201  FELIDGGVAA  TNPTLLALTH  IRNEIIRQNP  RFIGANLTES  KSRLVLSLGT
251  GKSEYKEKYN  ADMTSKWRLY  NWALYNGNSP  AVDIFSNASS  DMVDSHLSAL
301  FKSLDCEDYY LRIQDDTLTG EESGHIATE ENLQRLVEIG  TELLEKQESR
351  INLDTGRLES IPGAPTNEAA IAKFAKLLSE  ERKLRQLK
```

Spot No.: **P33**

NCBI accession No.: **gi|6707018** Species: *Hevea brasiliensis*

**PFF** score: **[196]**

Protein name: **latex protein allergen Hev b 7**

Matched peptides No.: **[5]** Sequence coverage %: **[22]**

Matched sequences: **K.LQDL DGP DAR.I;**

**R.DNYDPIHSIGPIYDGEYLR.E;**

**K.LLPVIFSSDDAK.C;**

**R.IQDDTLTGEESGHIATEENLQR.L;**

**R.INLDTGRLESIPGAPTNEAAIAK.F**

Calculated Mr: **43107**

Calculated pI: **5.00**

Probability Based Mowse Score:

Ions score is  $-10 \cdot \log(P)$ , where P is the probability that the observed match is a random event. Individual ions scores  $> 45$  indicate identity or extensive homology ( $p < 0.05$ ). Protein scores are derived from ions scores as a non-probabilistic basis for ranking protein hits.

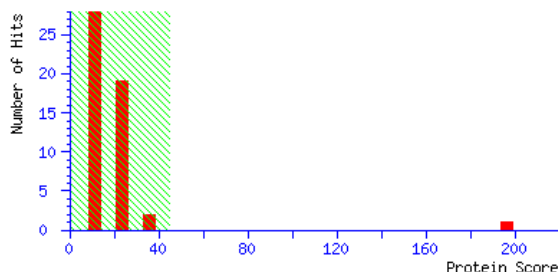

Matched peptide sequences: shown in **Bold Red**:

```
1  MATGSTPLTQ  GKKITVLSID  GGGIRGIIPG  IILASLESKL  QDL DGP DAR I
51  ADYFDIIAGT  STGGLITTML  TAPNEDKKPM  YQAKDIKDFY  LENCPKIFPK
101  ESR DNYDPIH  SIGPIYDGEY  LRELCNLLK  DLTVKDTLTD  VIIPTFDIKL
151  LLPVIFSSDD  AKCNALKNAR  LADVCIESTA  APVLLPAHSF  TTEDDKNIHT
201  FELIDGGVAA  TNPTLLALTH  IRNEIIRQNP  RFIGANLTES  KSRLVLSLGT
251  GKSEYKEKYN  ADMTSKWRLY  NWALYNGNSP  AVDIFSNASS  DMVDFHLSAL
301  FKSLDCEDYY  LRIQDDTLTG  EESGHIATE  ENLQRLVEIG  TELLEKQESR
351  INLDTGRLES  IPGAPTNEAA  IAKFAKLLSE  ERKLRQLK
```

Spot No.: **P34**

NCBI accession No.: **gi|32186890** Species: *Gossypium hirsutum*

PFF score: **[392]**

Protein name: **actin**

Matched peptides No.: **[7]**

Sequence coverage %: **[29]**

Matched sequences: **K.IWHHTFYNELR.V;**

**R.VAPEEHPVLLTEAPLNPK.A;**

**R.TTGIVLDSGDGVSHTVPIYEGYALPHAILR.L;**

**K.NYELPDGQVITIGAER.F;**

**R.KDLYGNIVLSGGSTMFPGIADR.M + Oxidation (M);**

**K.DLYGNIVLSGGSTMFPGIAD;**

**R.M + Oxidation (M);**

**K.GEYDESGPSIVHR.K**

Calculated Mr: **41917**

Calculated pI: **5.31**

Probability Based Mowse Score:

Ions score is  $-10 \cdot \log(P)$ , where P is the probability that the observed match is a random event. Individual ions scores  $> 45$  indicate identity or extensive homology ( $p < 0.05$ ). Protein scores are derived from ions scores as a non-probabilistic basis for ranking protein hits.

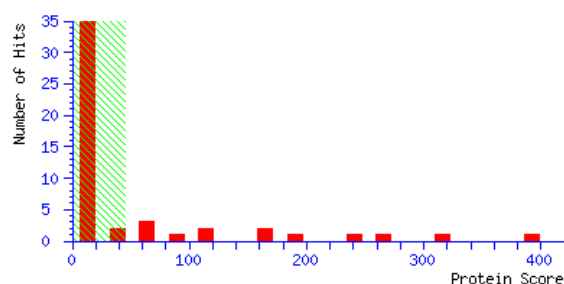

Matched peptide sequences: shown in **Bold Red**:

```
1  MADGEDIQPL VCDNGTGMVK AGFAGDDAPR AVFPSIVGRP RHTGVMVGMG
51  QKDAYVVGDEA QSKRGILTILK YPIEHGIVSN WDDMEKIWHH TFYNELRVAP
101 EEHPVLLTEA PLNPKANREK MTQIMFETFN VPAMYVAIQV VLSLYASGRT
151 TGIVLDSGDG VSHTVPIYEG YALPHAILRL DLAGRDLTDA LMKILTERGY
201 MFTTTAEREI VRDMKEKLAY VALDYEQELE TAKSSSSVEK NYELPDGQVI
251 TIGAERFRCP EVLFQPSFIG MEAAGIHETT YNSIMKCDVD IRKDLYGNIV
301 LSGGSTMFPG IADRMSKEIT ALAPSSMKIK VVAPPERKYS VWIGGSILAS
351 LSTFQQMWIS KGEYDESGPS IVHRKCF
```

Spot No.: **P35**

NCBI accession No.: [gi|255552291](#) Species: *Ricinus communis*

**PFF** score: **[141]**

Protein name: [short chain dehydrogenase, putative](#)

Matched peptides No.: **[2]** Sequence coverage %: **[10]**

Matched sequences: [K.VALVTGGDSGIGR.A;](#)

[K.DPIAIPTDVGFENCR.K](#)

Calculated Mr: **32148**

Calculated pI: **6.50**

Probability Based Mowse Score:

Ions score is  $-10 \cdot \log(P)$ , where P is the probability that the observed match is a random event. Individual ions scores  $> 44$  indicate identity or extensive homology ( $p < 0.05$ ). Protein scores are derived from ions scores as a non-probabilistic basis for ranking protein hits.

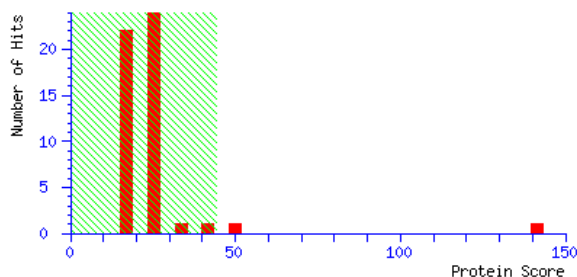

Matched peptide sequences: shown in **Bold Red**:

```
1  MATRRGYRFP  PQSQDKQPGK  EYLMHPLPEF  INPHYKPSNK  LQDKVALVTG
51  GDSGIGRAVS  YYFTLEGATV  AFTYVKGRED  KDKDHILKIL  HEVKAEGAKD
101 PIAIPTDVGF  EENCRKVIDQ  IMSEYGKIDI  LVNNAGEAHY  STTIEDITDP
151 MLERVFRTNI  FGHFFMSRHA  LKHMKEGGCI  INTASVAAYA  GFSFMVDYSS
201 TKGAVVAFTR  SLALQLIDRG  IRVNAVAPGS  VWTPFQPSTL  SAEQVAQVGS
251 GVPMDRAAQF  YEIAPSFVFL  ASNDCSSYFT  GQVLHPNGMF
```

Spot No.: **P36**

NCBI accession No.: **gi|38122474** Species: *Hevea brasiliensis*

**PFF** score: **[393]**

Protein name: **Rubber elongation factor protein**

Matched peptides No.: **[9]**

Sequence coverage %: **[26]**

Matched sequences:

| Query              | Start - End | Observed  | Mr(expt)  | Mr(calc)  | ppm   | M Score | Expect | Rank    | U  | Peptide              |                 |
|--------------------|-------------|-----------|-----------|-----------|-------|---------|--------|---------|----|----------------------|-----------------|
| <a href="#">95</a> | 57 - 69     | 1516.7605 | 1515.7532 | 1515.7722 | -12.5 | 0       | 103    | 1.1e-07 | 1  | U K.YLDFVQAATVYAR.A  |                 |
| <a href="#">96</a> | 57 - 69     | 1516.8470 | 1515.8397 | 1515.7722 | 44.6  | 0       | 110    | 2.4e-08 | 1  | U K.YLDFVQAATVYAR.A  |                 |
| <a href="#">83</a> | 83 - 96     | 1474.7504 | 1473.7431 | 1473.7576 | -9.82 | 1       | 53     | 0.012   | 1  | U K.SGPFKPGVNTVESR.F |                 |
| <a href="#">84</a> | 83 - 96     | 1474.8275 | 1473.8202 | 1473.7576 | 42.5  | 1       | 112    | 1.6e-08 | 1  | U K.SGPFKPGVNTVESR.F |                 |
| <a href="#">13</a> | 99 - 107    | 1061.6001 | 1060.5928 | 1060.6029 | -9.52 | 1       | 17     |         | 57 | 2                    | U K.SVVRPVYNK.F |
| <a href="#">14</a> | 99 - 107    | 1061.6669 | 1060.6596 | 1060.6029 | 53.5  | 1       | 41     | 0.23    | 1  | U K.SVVRPVYNK.F      |                 |
| <a href="#">65</a> | 122 - 132   | 1306.7577 | 1305.7504 | 1305.7041 | 35.5  | 1       | 64     | 0.00089 | 1  | U R.RVDAYVTVLDR.I    |                 |
| <a href="#">27</a> | 123 - 132   | 1150.6016 | 1149.5943 | 1149.6030 | -7.54 | 0       | 53     | 0.012   | 1  | U R.VDAYVTVLDR.I     |                 |
| <a href="#">28</a> | 123 - 132   | 1150.6576 | 1149.6503 | 1149.6030 | 41.2  | 0       | 66     | 0.00054 | 1  | U R.VDAYVTVLDR.I     |                 |

Calculated Mr: **19570**

Calculated pI: **5.06**

Probability Based Mowse Score:

Ions score is  $-10 \cdot \log(P)$ , where P is the probability that the observed match is a random event. Individual ions scores  $> 44$  indicate identity or extensive homology ( $p < 0.05$ ). Protein scores are derived from ions scores as a non-probabilistic basis for ranking protein hits.

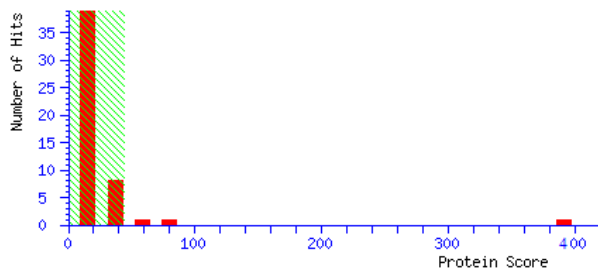

Matched peptide sequences: shown in **Bold Red**:

1 MAEGEEEVNI QEEANKGEEN PQEENIQEE TNKGEENIQE EANIEEEEANK  
51 EEESLKYLDF **VQAATVYARA** SFSKLYLFAK **DKSGPFKPGV** **NTVESRFKSV**  
101 **VRPVYMKFQP** VPNKVLKFAD **RRVDAYVTVL** DRIVPPIVKR ASIQAYSVAP  
151 GAALAVASYL PLHTKRLSKV LYGDG



Spot No.: **P37**

NCBI accession No.: **gi|334854634** Species: *Hevea brasiliensis*

**PFF** score: **[288]** Protein name: **elicitor-responsive protein**

Matched peptides No.: **[3]** Sequence coverage %: **[26]**

Matched sequences:

| Start - End | Observed  | Mr(expt)  | Mr(calc)  | ppm | Miss | Sequence                                                     |
|-------------|-----------|-----------|-----------|-----|------|--------------------------------------------------------------|
| 2 - 14      | 1295.8593 | 1294.8520 | 1294.7860 | 51  | 0    | <b>M.PLGTVEVLLVGAK.G</b> ( <a href="#">Ions score 90</a> )   |
| 47 - 55     | 1075.5344 | 1074.5271 | 1074.4618 | 61  | 0    | <b>K.GSEPEWNEK.F</b> ( <a href="#">Ions score 53</a> )       |
| 56 - 70     | 1687.8898 | 1686.8825 | 1686.7989 | 50  | 0    | <b>K.FSFEVSDGDELTLK.I</b> ( <a href="#">Ions score 145</a> ) |

Calculated Mr: **15249**

Calculated *pI*: **4.06**

Probability Based Mowse Score:

Ions score is  $-10 \cdot \log(P)$ , where P is the probability that the observed match is a random event.

Individual ions scores  $> 44$  indicate identity or extensive homology ( $p < 0.05$ ).

Protein scores are derived from ions scores as a non-probabilistic basis for ranking protein hits.

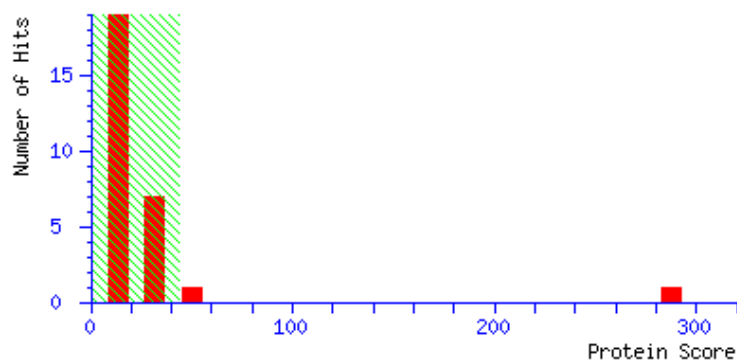

Matched peptide sequences: shown in **Bold Red**

```
1 MPLGTVEVLL VGAKGLENTD FLNGVDPYV LACRTQEQKS SVASGKGSEP  
51 EWNEKFSFEV SDGDDELTLK IMDSVGAAD DFGVEAT IPL EPLFLEGNLP  
101 STAYKVVKEQ EYKGEITVGL TFTPEVEMDN VGVDGYDFRL
```

Spot No.: **P38**

NCBI accession No.: **gi| 14423933** Species: *Hevea brasiliensis*

PFF score: **[353]**

Protein name: **Small rubber particle protein**

Matched peptides No.: **[9]**

Sequence coverage %: **[38]**

Calculated Mr: **22331**

Calculated pI: **4.80**

Matched sequences:

| Query              | Start - End | Observed  | Mr (expt) | Mr (calc) | ppm   | M Score | Expect | Rank    | U | Peptide                  |
|--------------------|-------------|-----------|-----------|-----------|-------|---------|--------|---------|---|--------------------------|
| <a href="#">10</a> | 6 - 20      | 1865.7990 | 1864.7917 | 1864.7711 | 11.1  | 0       | 96     | 4.2e-07 | 1 | U K.ENENFQQEANEQEEK.L    |
| <a href="#">11</a> | 6 - 20      | 1865.7990 | 1864.7917 | 1864.7711 | 11.1  | 0       | 96     | 4.2e-07 | 1 | U K.ENENFQQEANEQEEK.L    |
| <a href="#">12</a> | 6 - 20      | 1865.9290 | 1864.9217 | 1864.7711 | 80.8  | 0       | 98     | 2.6e-07 | 1 | U K.ENENFQQEANEQEEK.L    |
| <a href="#">7</a>  | 47 - 64     | 1810.9230 | 1809.9157 | 1809.9472 | -17.4 | 1       | 110    | 2.3e-08 | 1 | U K.DNSGPLKPGVETIEGVAK.T |
| <a href="#">8</a>  | 47 - 64     | 1811.0605 | 1810.0532 | 1809.9472 | 58.6  | 1       | 153    | 1.4e-12 | 1 | U K.DNSGPLKPGVETIEGVAK.T |
| <a href="#">9</a>  | 47 - 64     | 1811.1030 | 1810.0957 | 1809.9472 | 82.0  | 1       | 142    | 1.6e-11 | 1 | U K.DNSGPLKPGVETIEGVAK.T |
| <a href="#">2</a>  | 102 - 113   | 1347.6600 | 1346.6527 | 1346.6500 | 2.00  | 0       | 25     | 7.6     | 1 | U K.QLPTQACDTSVK.E       |
| <a href="#">3</a>  | 102 - 113   | 1347.6600 | 1346.6527 | 1346.6500 | 2.00  | 0       | 25     | 7.6     | 1 | U K.QLPTQACDTSVK.E       |
| <a href="#">4</a>  | 102 - 113   | 1347.7468 | 1346.7395 | 1346.6500 | 66.5  | 0       | 102    | 1.4e-07 | 1 | U K.QLPTQACDTSVK.E       |

Probability Based Mowse Score:

Ions score is  $-10 \cdot \log(P)$ , where P is the probability that the observed match is a random event. Individual ions scores  $> 46$  indicate identity or extensive homology ( $p < 0.05$ ).

Protein scores are derived from ions scores as a non-probabilistic basis for ranking protein hits.

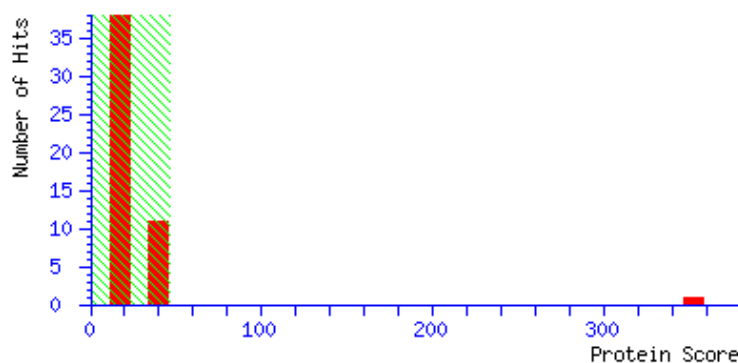

Matched peptide sequences: shown in **Bold Red**:

1 MAEGKENENF **QQEANEQEEK** LKYLEFVQAT TDNAVTALSN IYLYAKDNSG  
51 **PLKPGVETIE** **GVAKT**VVIPA SKIPTEAIKF ADRAVDASFT TLQNIIVPSVL  
101 **KQLPTQACDT** **SVKESAE**

Spot No.: **P39**

NCBI accession No.: **gi| 14423933** Species: *Hevea brasiliensis*

**PFF** score: **[342]**

Protein name: **Small rubber particle protein**

Matched peptides No.: **[7]**

Sequence coverage %: **[36]**

Calculated Mr: **22331**

Calculated pI: **4.80**

Matched sequences:

| Query              | Start - End | Observed  | Mr (expt) | Mr (calc) | ppm  | M Score | Expect | Rank    | U | Peptide                   |
|--------------------|-------------|-----------|-----------|-----------|------|---------|--------|---------|---|---------------------------|
| <a href="#">25</a> | 36 - 53     | 1881.1389 | 1880.1316 | 1880.0255 | 56.4 | 0       | 57     | 0.0022  | 1 | U K.DISGPLKPGVDTIENVVK.T  |
| <a href="#">11</a> | 91 - 105    | 1620.8983 | 1619.8910 | 1619.7903 | 62.2 | 0       | 102    | 8.7e-08 | 1 | U K.QVSAQTYSVAQDAPR.I     |
| <a href="#">27</a> | 106 - 124   | 1934.1237 | 1933.1164 | 1933.0157 | 52.1 | 0       | 87     | 2e-06   | 1 | U R.IVLDVASSVFNTGVQEGAK.A |
| <a href="#">28</a> | 106 - 124   | 1934.1260 | 1933.1187 | 1933.0157 | 53.3 | 0       | 108    | 1.7e-08 | 1 | U R.IVLDVASSVFNTGVQEGAK.A |
| <a href="#">29</a> | 106 - 124   | 1934.1260 | 1933.1187 | 1933.0157 | 53.3 | 0       | 108    | 1.7e-08 | 1 | U R.IVLDVASSVFNTGVQEGAK.A |
| <a href="#">2</a>  | 134 - 143   | 1236.7086 | 1235.7013 | 1235.6299 | 57.8 | 0       | 59     | 0.0024  | 1 | U K.AEQYAVITWR.A          |
| <a href="#">4</a>  | 183 - 194   | 1346.8149 | 1345.8076 | 1345.7493 | 43.3 | 0       | 16     | 44      | 1 | U R.VSSYLPLLPTEK.I        |

Probability Based Mowse Score:

Ions score is  $-10 \cdot \log(P)$ , where P is the probability that the observed match is a random event. Individual ions scores  $> 44$  indicate identity or extensive homology ( $p < 0.05$ ). Protein scores are derived from ions scores as a non-probabilistic basis for ranking protein hits.

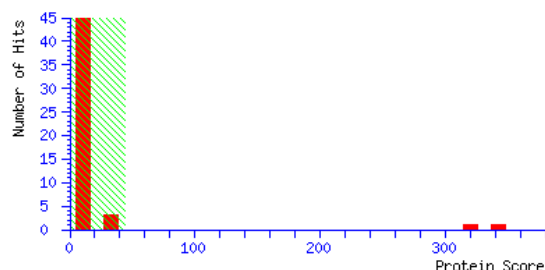

Matched peptide sequences: shown in **Bold Red**:

```
1 MAEEVEEERL KYLDFVRAAG VYAVDSFSTL YLYAKDISGP LKPGVDTIEN
51 VVKTVVTPVY YIPLEAVKfV DKTVDVSVTS LDGVVPPVIK QVSAQTYSVA
101 QDAPRIVLDV ASSVFNTGVQ EGAKALYANL EPKAEQYAVI TWRALNKLPL
151 VPQVANVVVP TAVYFSEKYN DVVRGTEQG YRVSSYLPLL PTEKITKVFQ
201 DEAS
```

Spot No.: **P40**

NCBI accession No.: **gi| 29170601** Species: *Hevea brasiliensis*

**PFF** score: **[316]**

Protein name: **Small rubber particle protein**

Matched peptides No.: **[12]** Sequence coverage %: **[53]**

Calculated Mr: **12769**

Calculated pI: **4.61**

Matched sequences:

| Query              | Start - End | Observed  | Mr(expt)  | Mr(calc)  | ppm   | M | Score | Expect  | Rank | U | Peptide                 |
|--------------------|-------------|-----------|-----------|-----------|-------|---|-------|---------|------|---|-------------------------|
| <a href="#">13</a> | 6 - 20      | 1865.7990 | 1864.7917 | 1864.7711 | 11.1  | 0 | 55    | 0.0043  | 1    | U | K.ENENFQQEANEQEEK.L     |
| <a href="#">14</a> | 6 - 20      | 1865.7990 | 1864.7917 | 1864.7711 | 11.1  | 0 | 55    | 0.0043  | 1    | U | K.ENENFQQEANEQEEK.L     |
| <a href="#">15</a> | 6 - 20      | 1865.9290 | 1864.9217 | 1864.7711 | 80.8  | 0 | 48    | 0.021   | 1    | U | K.ENENFQQEANEQEEK.L     |
| <a href="#">8</a>  | 47 - 64     | 1810.9230 | 1809.9157 | 1809.9472 | -17.4 | 0 | 54    | 0.0051  | 1    | U | K.DNSGPLKPGVETIEGVAK.T  |
| <a href="#">9</a>  | 47 - 64     | 1810.9230 | 1809.9157 | 1809.9472 | -17.4 | 0 | 54    | 0.0051  | 1    | U | K.DNSGPLKPGVETIEGVAK.T  |
| <a href="#">10</a> | 47 - 64     | 1810.9230 | 1809.9157 | 1809.9472 | -17.4 | 0 | 54    | 0.0051  | 1    | U | K.DNSGPLKPGVETIEGVAK.T  |
| <a href="#">11</a> | 47 - 64     | 1811.0624 | 1810.0551 | 1809.9472 | 59.6  | 0 | 121   | 9.1e-10 | 1    | U | K.DNSGPLKPGVETIEGVAK.T  |
| <a href="#">12</a> | 47 - 64     | 1811.1030 | 1810.0957 | 1809.9472 | 82.0  | 0 | 36    | 0.31    | 1    | U | K.DNSGPLKPGVETIEGVAK.T  |
| <a href="#">16</a> | 84 - 101    | 1902.9020 | 1901.8947 | 1902.0462 | -79.7 | 0 | 56    | 0.0028  | 1    | U | R.AVDASFTTLQNIIVPSVLK.Q |
| <a href="#">1</a>  | 102 - 113   | 1347.6600 | 1346.6527 | 1346.6500 | 2.00  | 0 | 6     | 3.8e+02 | 5    | U | K.QLPTQACDTSVK.E        |
| <a href="#">2</a>  | 102 - 113   | 1347.6600 | 1346.6527 | 1346.6500 | 2.00  | 0 | 6     | 3.8e+02 | 5    | U | K.QLPTQACDTSVK.E        |
| <a href="#">3</a>  | 102 - 113   | 1347.7456 | 1346.7383 | 1346.6500 | 65.6  | 0 | 84    | 6.8e-06 | 1    | U | K.QLPTQACDTSVK.E        |

Probability Based Mowse Score:

Ions score is  $-10 \cdot \log(P)$ , where P is the probability that the observed match is a random event. Individual ions scores  $> 44$  indicate identity or extensive homology ( $p < 0.05$ ). Protein scores are derived from ions scores as a non-probabilistic basis for ranking protein hits.

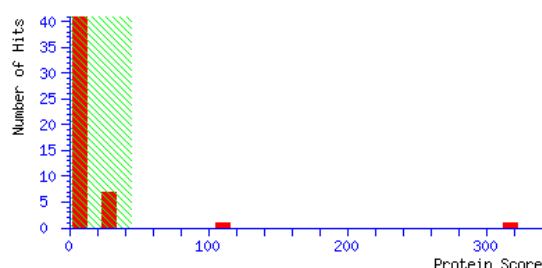

Matched peptide sequences: shown in **Bold Red**:

1 MAEG**KENENF QQEANEQEEK** LKYLEFVQAT TDNAVTALSN IYLYAKDNSG  
51 **PLKPGVETIE GVAKTVVIPA** SKIPTEAIKF ADRAVDASFT TLQNIIVPSVL  
101 **QQLPTQACDT SVKESAE**

Spot No.: **P41**

NCBI accession No.: **gi|2832430** Species: *Hevea brasiliensis*

**PFF** score: **[261]**

Protein name: **prohevein**

Matched peptides No.: **[3]** Sequence coverage %: **[26]**

Matched sequences: **K.YGWTAFCGPVGAHGQPSCKG.C;**

**R.IVDQCSNGGLDLVDNVFR.Q;**

**R.QLDTDGKGYER.G**

Calculated Mr: **20852**

Calculated pI: **5.64**

### Probability Based Mowse Score:

Ions score is  $-10 \cdot \log(P)$ , where P is the probability that the observed match is a random event. Individual ions scores  $> 44$  indicate identity or extensive homology ( $p < 0.05$ ). Protein scores are derived from ions scores as a non-probabilistic basis for ranking protein hits.

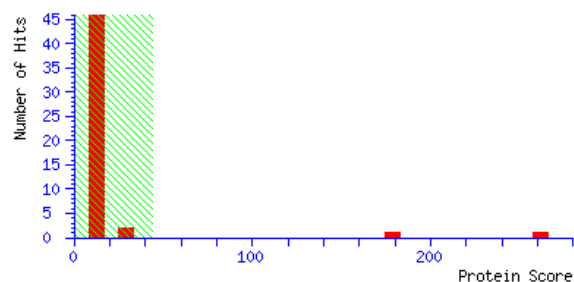

Matched peptide sequences: shown in **Bold Red**:

```
1 EQCGRQAGGK LCPNNLCCSQ WGWCGSTDEY CSPDHNCQSN CKDSGEGVGG
51 GSASNVLATY HLYNSQDHGW DLNAASAYCS TWDANKPYSW RSKYGWTAFC
101 GPVGAHGQPS CGKCLSVTNT GTGAKATVRI VDQCSNGGLD LDVNVFRQLD
151 TDGKGYERGH LTVNYQFVDC GDSFNPLFSV MKSSVIN
```

Spot No.: **P42 (S9)**

NCBI accession No.: **gi|388503664** Species: *Lotus japonicus*

Protein name: **unknown**

Mascot score: **93**

Sequence coverage %: **45**

Matched peptides No.: **13**

Total peptides No.: **48**

Calculated Mr: **29537**

Calculated pl: **4.79**

Probability Based Mowse Score:

Protein score is  $-10 \cdot \log(P)$ , where P is the probability that the observed match is a random event. Protein scores greater than 73 are significant ( $p < 0.05$ ).

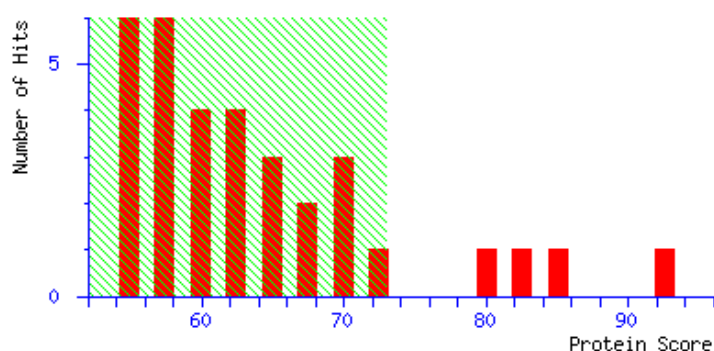

Matched peptide sequences: shown in **Bold Red**:

```
1  MASSKDRGTF VYVAKLAEQA ERYEEMVDSM KKVANLDVEL TVEERNLLSV
51 GYKNVIGARR ASWRILSSIE QKEETKGNDV NAKRIKEYRQ KVESELADIC
101 NDVMRVIDEH LIPSATAGES TVFYKMKGD YYRYLAEFKS GNEKKEAADQ
151 SMKAYESATT AAEALPPTH PIRLGLALNF SVFYYEILNS PERACHLAKQ
201 AFDEAISELD TLNEESYKDS TLIMQLLRDN LTLWTSDIPE EGEDSLKAND
251 TAKVGGGEDA E
```

Spot No.: **P43**

NCBI accession No.: **gi|326694865** Species: *Hevea brasiliensis*

**PFF score: [294]**

**Protein name: 14-3-3 protein 2**

Matched peptides No.: **[7]**

Sequence coverage %: **[32]**

Matched sequences:

| Query               | Start - End | Observed  | Mr(expt)  | Mr(calc)  | ppm  | M | Score | Expect  | Rank | U   | Peptide                         |
|---------------------|-------------|-----------|-----------|-----------|------|---|-------|---------|------|-----|---------------------------------|
| <a href="#">#38</a> | 17 - 33     | 2131.7244 | 2130.7171 | 2130.9601 | -114 | 1 | 4     | 5e+02   | 3    | ... | <b>K.LAEQAERYEEMVEFMK.V</b>     |
| <a href="#">#16</a> | 24 - 33     | 1334.4153 | 1333.4080 | 1333.5570 | -112 | 0 | 21    | ...     | 12   | ... | <b>R.YEEMVEFMK.V</b>            |
| <a href="#">#20</a> | 37 - 48     | 1418.5446 | 1417.5373 | 1417.6936 | -110 | 0 | 84    | 6.7e-06 | 1    | ... | <b>K.TVDVEELTVEER.N</b>         |
| <a href="#">#6</a>  | 80 - 89     | 1125.4647 | 1124.4574 | 1124.5826 | -111 | 0 | 28    | 2.7     | 1    | ... | <b>R.GNEDHVTIK.E</b>            |
| <a href="#">#33</a> | 160 - 176   | 1788.7595 | 1787.7522 | 1787.9530 | -112 | 0 | 78    | 2e-05   | 1    | ... | <b>K.SAQDIALADLAPTHPIR.L</b>    |
| <a href="#">#40</a> | 177 - 196   | 2330.9053 | 2329.8980 | 2330.1947 | -127 | 0 | 30    | 1.3     | 1    | ... | <b>R.LGLALNFSVFYIEILNSPDR.A</b> |
| <a href="#">#9</a>  | 222 - 231   | 1189.5359 | 1188.5286 | 1188.6536 | -105 | 0 | 50    | 0.02    | 2    | ... | <b>K.DSTLIMQLL.R</b>            |

Calculated Mr: **29931**

Calculated pI: **4.76**

Probability Based Mowse Score:

Ions score is  $-10 \cdot \log(P)$ , where P is the probability that the observed match is a random event. Individual ions scores  $> 45$  indicate identity or extensive homology ( $p < 0.05$ ). Protein scores are derived from ions scores as a non-probabilistic basis for ranking protein hits.

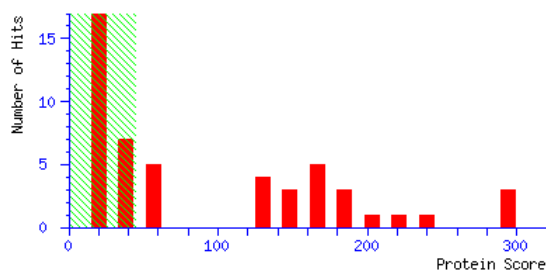

Matched peptide sequences: shown in **Bold Red**:

```
1 MSPTESSREE NVYMAKLAEQ AERYEEMVEF MEKVAKTVDV EELTVEERNL
51 LSVAYKNVIG ARRASWRIIS SIEQKEESRG NEDHVTIKE YRGKIESELS
101 KICDGILSLL ESHLIPSASS AESKVFYLKM KGDYHRYLAE FKTAGERKEA
151 AESTLLAYKS AQDIALADLA PTHPIRLGLA LNFSVFYIEI LNSPDRACNL
201 AKQAFDEAIS ELDTLGEESY KDSTLIMQLL RDNLTLWTS DITDEAGDEIK
251 EASKRESGEG QPQQ
```

Spot No.: P44 (S85)

NCBI accession No.: [gi|224099853](#) Species: *Populus trichocarpa*

PFF score: [69] Protein name: putative protein

Matched peptides No.: [2] Sequence coverage %: [5]

Matched sequences: [S FEHPLNELKP VPR](#)

Calculated Mr: 27448

Calculated pI: 5.84

Probability Based Mowse Score:

Ions score is  $-10 \cdot \log(P)$ , where P is the probability that the observed match is a random event.

Individual ions scores > 45 indicate identity or extensive homology ( $p < 0.05$ ).

Protein scores are derived from ions scores as a non-probabilistic basis for ranking protein hits.

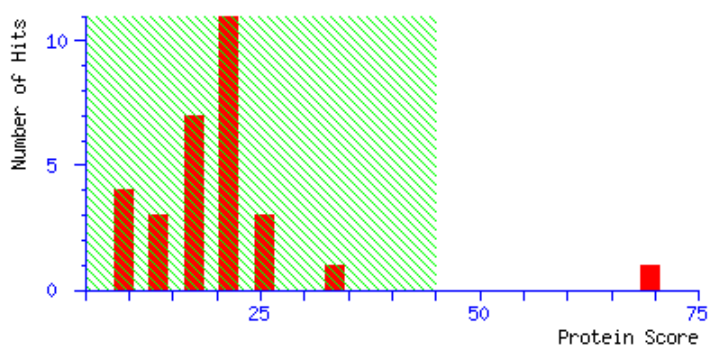

Matched peptide sequences: shown in **Bold Red**

```
1 MLAVFDNTVA KCPDALQSPH SAPASSALKD GFLANHFASQ HPGSVTVNLG
51 TSGLISHSVE KQNPFLPRLF AVVDDIFCLF QGHIDNVAVL KQQYGLNKTA
101 NEVIVVIEAY RTLRDRGPYP ADQVVKDIQG KFAFILDST SKATFFAADA
151 DGSVPFFWGA DSEGNLVLSD DVQIVQKCG KSFAPFKGC FFTTSGGLRS
201 FEHPLNELKP VPRVDSSGQV CGATFKVDAE TKKESVGMPR VDSSYNWSSN
251 Y
```



Spot No.: P45

NCBI accession No.: [gi|124365253](#) Species: *Hevea brasiliensis*

**PPF score:** [745] **Protein name:** beta-1,3-glucanase

Matched peptides No.: [16] Sequence coverage %: [44]

Matched sequences:

| Query                | Start - End | Observed  | Mr (expt) | Mr (calc) | ppm  | M | Score | Expect  | Rank | U | Peptide                          |
|----------------------|-------------|-----------|-----------|-----------|------|---|-------|---------|------|---|----------------------------------|
| <a href="#">#10</a>  | 69 - 81     | 1501.8600 | 1500.8527 | 1500.7936 | 39.4 | 0 | 82    | 1.1e-05 | 1    | U | R.IYDPNQAVLEALR.G                |
| <a href="#">#11</a>  | 69 - 81     | 1501.9630 | 1500.9557 | 1500.7936 | 108  | 0 | 66    | 0.00036 | 1    | U | R.IYDPNQAVLEALR.G                |
| <a href="#">#12</a>  | 69 - 81     | 1502.0040 | 1500.9967 | 1500.7936 | 135  | 0 | 78    | 2.7e-05 | 1    | U | R.IYDPNQAVLEALR.G                |
| <a href="#">#20</a>  | 82 - 106    | 2581.6631 | 2580.6558 | 2580.3395 | 123  | 0 | 78    | 2e-05   | 1    |   | R.GSNIELILGVPSNDLQSLTNPSNAK.S    |
| <a href="#">#1</a>   | 115 - 121   | 838.5450  | 837.5377  | 837.4133  | 149  | 0 | 27    | 3.9     | 1    | U | R.GFWSSVR.F                      |
| <a href="#">#124</a> | 124 - 136   | 1431.9120 | 1430.9047 | 1430.7518 | 107  | 0 | 65    | 0.0006  | 1    |   | R.YIAVGNIEISPVNRR.G              |
| <a href="#">#17</a>  | 167 - 188   | 2236.2949 | 2235.2876 | 2235.1535 | 60.0 | 0 | 85    | 3.5e-06 | 1    |   | K.VSTAIIDLTLVGNSYPPSAGAFRR.D     |
| <a href="#">#18</a>  | 167 - 188   | 2236.3291 | 2235.3218 | 2235.1535 | 75.3 | 0 | 125   | 3.9e-10 | 1    |   | K.VSTAIIDLTLVGNSYPPSAGAFRR.D     |
| <a href="#">#3</a>   | 193 - 200   | 975.6890  | 974.6818  | 974.5549  | 130  | 0 | 24    | 11      | 1    |   | R.SYLNPIIR.F                     |
| <a href="#">#4</a>   | 193 - 200   | 975.7050  | 974.6977  | 974.5549  | 147  | 0 | 36    | 0.68    | 1    |   | R.SYLNPIIR.F                     |
| <a href="#">#5</a>   | 193 - 200   | 975.7600  | 974.7527  | 974.5549  | 203  | 0 | 46    | 0.065   | 1    |   | R.SYLNPIIR.F                     |
| <a href="#">#19</a>  | 225 - 245   | 2350.3850 | 2349.3777 | 2349.2005 | 75.4 | 0 | 30    | 1.1     | 1    |   | R.DISLPHYALFTSPSVVWDGQR.G        |
| <a href="#">#15</a>  | 249 - 264   | 1812.0800 | 1811.0727 | 1810.9101 | 89.8 | 0 | 104   | 4.3e-08 | 1    | U | K.NLFDATLDALYSALER.A             |
| <a href="#">#21</a>  | 265 - 293   | 2826.4260 | 2825.4187 | 2825.3257 | 32.9 | 0 | 135   | 2.3e-11 | 1    |   | R.ASGGSLEVSVESGWP SAGAFATFDNRR.T |
| <a href="#">#7</a>   | 294 - 304   | 1315.9490 | 1314.9417 | 1314.7296 | 161  | 0 | 30    | 1.8     | 1    |   | R.TYLSNLIQHVK.R                  |
| <a href="#">#8</a>   | 294 - 304   | 1316.0090 | 1315.0017 | 1314.7296 | 207  | 0 | 55    | 0.0051  | 1    |   | R.TYLSNLIQHVK.R                  |

Calculated Mr: 41543

Calculated pI: 9.40

Probability Based Mowse Score:

Ions score is  $-10 \cdot \log(P)$ , where P is the probability that the observed match is a random event. Individual ions scores > 44 indicate identity or extensive homology ( $p < 0.05$ ). Protein scores are derived from ions scores as a non-probabilistic basis for ranking protein hits.

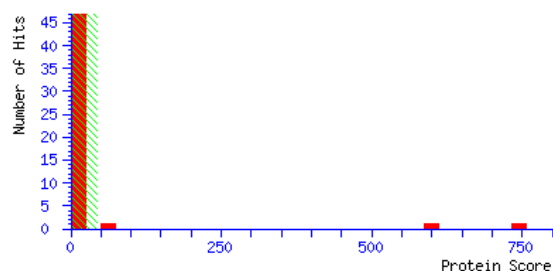

Matched peptide sequences: shown in **Bold Red**

```
1 MAISSSTSGT SSSLPSRTTV MLLLFFFTAS VGITDAQVGV CYGMQGNLRF
51 PVSEVIALYK KSNITRMRIY DPNQAVLEAL RGSNIELILG VPNSDLQSLT
101 NPSNAKSWVQ KNVRGFWSSV RFRYIAVGNE ISPVNRGTAW LAQFVLPAMR
151 NIHDAIRSAG LQDQIKVSTA IDLTLVGNSY PPSAGAFRDD VRSYLNPIIR
201 FLSSIRSPLL ANIYPYFTYA GNPRDISLPY ALFTSPSVVV WDGQRGYKNL
251 FDATLDALYS ALERASGGSL EVVVSESGWP SAGAFAATFD NGRTYLSNLI
301 QHVKRGTPKR PKRAIETYLF AMFDENKKQP EVEKHFGGLFF PNKWQKYNLN
351 FSAEKNWDIS TEHNATILFL KSDM
```

Spot No.: **P46**

NCBI accession No.: [gi|224102193](#)

Species: *Populus trichocarpa*

**PFF score: [347]**

Protein name: **NAD-dependent malate dehydrogenase**

Matched peptides No.: **[5]**

Sequence coverage %: **[19]**

Matched sequences:

| Query              | Start - End | Observed  | Mr(expt)  | Mr(calc)  | ppm  | M Score | Expect | Rank    | U        | Peptide                    |
|--------------------|-------------|-----------|-----------|-----------|------|---------|--------|---------|----------|----------------------------|
| <a href="#">13</a> | 127 - 142   | 1650.0818 | 1649.0745 | 1648.9876 | 52.7 | 0       | 30     | 1.2     | <u>1</u> | K.VLVVANPANTNALILK.E       |
| <a href="#">20</a> | 212 - 231   | 2434.3748 | 2433.3675 | 2433.2176 | 61.6 | 1       | 191    | 7.2e-17 | <u>1</u> | U.R.ELVKDDEWLNAEFITTVQQR.G |
| <a href="#">18</a> | 216 - 231   | 1965.0579 | 1964.0506 | 1963.9276 | 62.7 | 0       | 50     | 0.012   | <u>1</u> | U.K.DDEWLNAEFITTVQQR.G     |
| <a href="#">15</a> | 240 - 256   | 1774.0004 | 1772.9931 | 1772.8839 | 61.6 | 1       | 67     | 0.00026 | <u>1</u> | R.KLSSALSAASSACDHIR.D      |
| <a href="#">11</a> | 312 - 324   | 1490.8445 | 1489.8372 | 1489.7511 | 57.8 | 1       | 9      | 1.8e+02 | <u>1</u> | K.KLDLTADELSEEK.A          |

Calculated Mr: **36093**

Calculated pI: **6.11**

Probability Based Mowse Score:

Ions score is  $-10 \cdot \log(P)$ , where P is the probability that the observed match is a random event. Individual ions scores  $> 44$  indicate identity or extensive homology ( $p < 0.05$ ). Protein scores are derived from ions scores as a non-probabilistic basis for ranking protein hits.

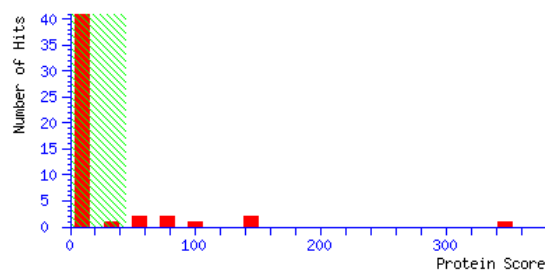

Matched peptide sequences: shown in **Bold Red**:

```
1 MAKEPVRVLV TGAAGQIGYA LVPMIARGVM LGPDQPVILH MLDIPPAAEA
51 LNGVKMELVD AAFPLLKGVV ATTDVVEACT GVNIAVMVGG FPRKEGMERK
101 DVMSKNVSIY KSQASALEKH AAANCKVLV ANPANTNALI LKEFAPSISE
151 KNITCLTRLD HNRALGQISE RLSVQVCDVK NVIIWGNHSS SQYPDVNHAT
201 VKTPAGEKPV RELVKDDEWL NAEFITTVQQ RGAAIKARK LSSALSAASS
251 ACDHIRDWVL GTPEGTWVSM GVYSDGSYNV PAGLIYSFPV TCQNGEWKIV
301 QGLSIDEFSR KKLDLTADEL SEEKALAYSC LS
```

Spot No.: **P47**

NCBI accession No.: **gi| 255578278**

Species: ***Ricinus communis***

**PFF score: [75]**

Protein name: **hypothetical protein RCOM\_053778**

Matched peptides No.: **[2]**

Sequence coverage %: **[6]**

Matched sequences: **K.QESEYGGGYGR.R; R.KPSYGEEGGYGER.T**

Calculated Mr: **41389**

Calculated pI: **4.65**

Probability Based Mowse Score:

Ions score is  $-10 \cdot \log(P)$ , where P is the probability that the observed match is a random event. Individual ions scores  $> 44$  indicate identity or extensive homology ( $p < 0.05$ ). Protein scores are derived from ions scores as a non-probabilistic basis for ranking protein hits.

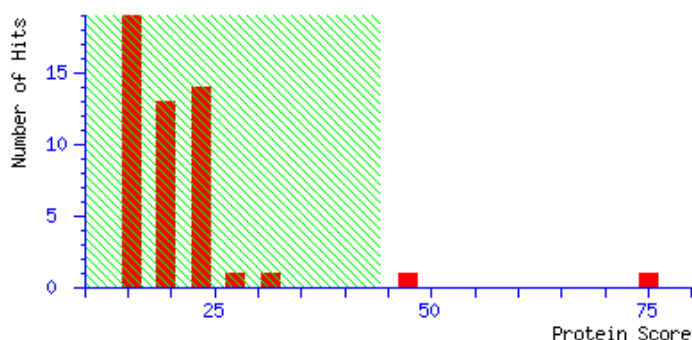

Matched peptide sequences: shown in **Bold Red**:

```
1  MPYYTRSEDD  VDNDFDFDPT  PYGGGYDLAL  TYGRPLPPSD  ETCYQNSAIA
51  DDDVDYDRPN  FTSYAEPSAY  NDDILQEEYN  SYSRPKPRPG  FIPGGGIGGD
101  PYSRPHAAPG  FQPGSGGYGG  VSEYEKPSGY  GRRPDSEYGS  GGYGGGTEYE
151  RPSGEDYGS  HGRKQDSEYG  SGGYGRRPES  EYGSGGGYER  PSSEEYGSY
201  GRKQESEYGS  GGYGRRPEAE  YGSGYGGRPE  TEYGGGGGSE  YGGGYGRKPS
251  YGEEGGYGER  TEYERPSYGD  DPPRRPGYGR  QDDEYERPSY  ERKSDDDNDG
301  SRRKYGGDDD  EKGYQKKYGG  YGDDDDDEEGS  RRKYGYGGEE  ESYGRKKYGD
351  DGSDDDEKKH  HRHKHHQHKH  SDDE
```

Spot No.: **P48**

NCBI accession No.: **gi|255552291** Species: *Ricinus communis*

**PFF** score: **[201]**

Protein name: **short chain dehydrogenase, putative**

Matched peptides No.: **[2]** Sequence coverage %: **[7]**

Matched sequences: **K.AEGAKDPIAIPTDVGFEEENCR.K;**

**K.DPIAIPTDVGFEEENCR.K**

Calculated Mr: **32148**

Calculated pI: **6.50**

Probability Based Mowse Score:

Ions score is  $-10 \cdot \log(P)$ , where P is the probability that the observed match is a random event. Individual ions scores  $> 45$  indicate identity or extensive homology ( $p < 0.05$ ). Protein scores are derived from ions scores as a non-probabilistic basis for ranking protein hits.

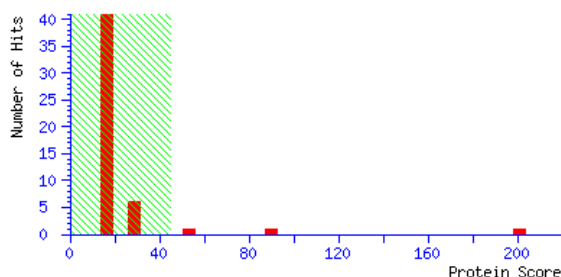

Matched peptide sequences: shown in **Bold Red**:

```
1 MATRRGYRFP PQSQDKQPGK EYLMHPLPEF INPHYKPSNK LQDKVALVTG
51 GDSGIGRAVS YYFTLEGATV AFTYVKGRED KDKDHILKIL HEVKAEGAKD
101 PIAIPTDVGF EENCRKVIDQ IMSEYGKIDI LVNNAGEAHY STTIEDITDP
151 MLERVFRTNI FGHFFMSRHA LKHMKEGGCI INTASVAAYA GFSEFMVDYSS
201 TKGAVVAFTR SLALQLIDRG IRVNAVAPGS VWTFFQPSTL SAEQVAQVGS
251 GVPMDRAAQF YEIAPSFVFL ASNDCSSYFT GQVLHPNGMF
```

Spot No.: **P49**

NCBI accession No.: **gi|255581753** Species: *Ricinus communis*

**PFF** score: **[175]**

Protein name: **adenosine kinase, putative**

Matched peptides No.: **[3]** Sequence coverage %: **[11]**

Matched sequences: **K.RPENWALVEK.A;**

**K.VLPYMDYVFGNETEAR.T + Oxidation (M);**

**R.AGCYAAANVIIQR.S**

Calculated Mr: **38058**

Calculated pI: **5.17**

### Probability Based Mowse Score:

Ions score is  $-10 \cdot \log(P)$ , where P is the probability that the observed match is a random event. Individual ions scores  $> 45$  indicate identity or extensive homology ( $p < 0.05$ ). Protein scores are derived from ions scores as a non-probabilistic basis for ranking protein hits.

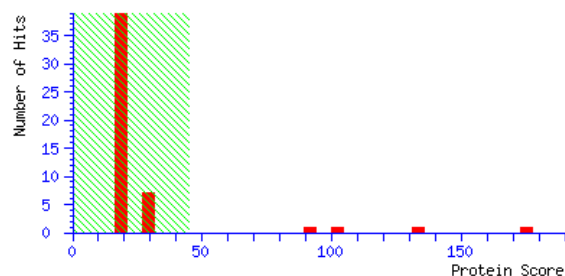

Matched peptide sequences: shown in **Bold Red**:

```
1 MASYEGILLG MGNPLLDISA VVDEDFLNKY EIKLNNAILA EDKHLPMYEE
51 MANNNSVEYI AGGATQNSIK VAQWMLQIPG ATSYMGCIGK DKFGEEMTKN
101 SKKAGVNVHY YEDETAPTGT CGVCVVGGER SLVANLSAAN CYKSEHLKRP
151 ENWALVEKAK YFYIAGFFLT VSPESIQLVA EHAAAANNKIF TMNLSAPFIC
201 EFFKDAQEKV LPYMDYVFGN ETEARTFAKV HGWETDNVEE IAKKISQWPK
251 ASGTHKRITV ITQGADPVVV AEDGKVKLFP VILLPKEKLV DTNGAGDAFV
301 GGFLSQLVQE KPIEECVRAG CYAAANVIIQR SGCTYPEKPD FS
```

Spot No.: **P50**

NCBI accession No.: **gi|4588474** Species: *Brassica napus*

**PFF** score: **[96]**

Protein name: **phosphoinositide-specific phospholipase C**

Matched peptides No.: **[2]** Sequence coverage %: **[3]**

Matched sequences: **R.VIELDIWPNSNKNDIDVLHGR.T;**

**K.NDIDVLHGR.T**

Calculated Mr: **66632**

Calculated pl: **5.79**

Probability Based Mowse Score:

Ions score is  $-10 \cdot \log(P)$ , where P is the probability that the observed match is a random event. Individual ions scores  $> 45$  indicate identity or extensive homology ( $p < 0.05$ ). Protein scores are derived from ions scores as a non-probabilistic basis for ranking protein hits.

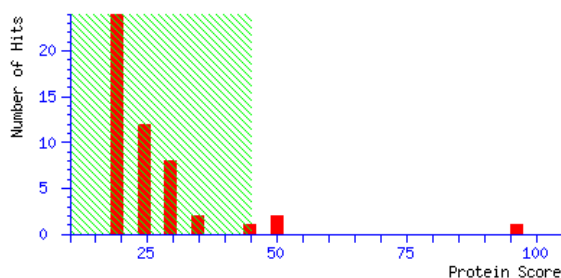

Matched peptide sequences: shown in **Bold Red**:

```
1  MSKQTYKVCF  CFNRRFRYTA  SEAPRDVCTL  FDKYSENGVM  TVDHLQRFLI
51  DVQKQDKATK  EDAQSIINAA  SLLHSNGLH  LDAFFKYLFG  DSNPPLALHE
101 VHQDMDAPIS  HYFIFTGHNS  YLTGNQLSSD  CSEVPIIDAL  KKGVRVIELD
151 IWPNSNKNDI  DVLHGRTLTS  PVELIKCLRA  IKTHAFEVSD  YPVVVITLEDH
201 LTPELQSKVA  EMVTEIFGEI  LFTPPVGESL  KEFPPNSLKL  RRIIISTKPP
251 KEYKEGKDED  VVQKGKALGD  EEVWGREVPS  FIERNKSGDK  DDLDEEDND
301 EDDDVEKFKK  NAPPQYKHLI  AIHAGKPKGS  ITACLKVDPD  KVRRLSLSEE
351 QLEKAAEKYA  KQIVRFTQQN  LLRIYKGRTR  VTSSNYNPLV  GWSHGAQMVA
401 FNMQGYGRSL  WLMQGMFRAN  GGCGYIKKPD  ILLKGGSDSD  IFDPKTTLPV
451 KTTLRVTIYM  GEGWYDFDRH  THFDQYSPPD  FYTRVGIAGV  PADTMKKTK
501 TLEDNWVPSW  DEVFEFPLTV  PELALLRLEV  HEYDMSEKDD  FGGQTCPLPW
551 ELQEGIRSFP  LHNRRKEEKYK  SVKLLVKVEF  V
```

Spot No.: **P51**

NCBI accession No.: **gi|255578278** Species: *Ricinus communis*

**PFF** score: **[95]**

Protein name: **hypothetical protein RCOM\_0537780**

Matched peptides No.: **[2]** Sequence coverage %: **[6]**

Matched sequences: **K.QESEYGSGGYGR.R;**  
**R.KPSYGEEGGYGER.T**

Calculated Mr: **41389**

Calculated pI: **4.65**

Probability Based Mowse Score:

Ions score is  $-10 \cdot \log(P)$ , where P is the probability that the observed match is a random event. Individual ions scores  $> 45$  indicate identity or extensive homology ( $p < 0.05$ ). Protein scores are derived from ions scores as a non-probabilistic basis for ranking protein hits.

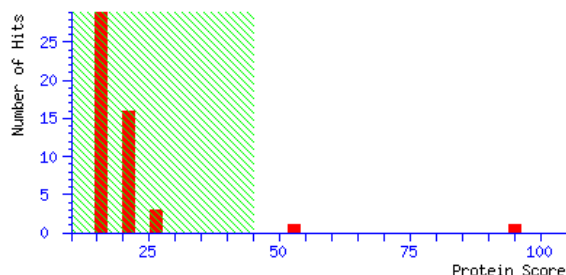

Matched peptide sequences: shown in **Bold Red**:

```
1  MPYYTRSEDD  VDNDFDFDPT  PYGGGYDLAL  TYGRPLPPSD  ETCYQNSAIA
51  DDDVDYDRPN  FTSYAEPSAY  NDDILQEEYN  SYSRPKPRPG  FIPGGGIGGD
101 PYSRPHAAPG  FQPGSGGYGG  VSEYEKPSGY  GRRPDSEYGS  GYGSGGTEYE
151 RPSGEDYGS  HGRKQDSEYG  SGGYGRRPES  EYGSGGGYER  PSSEEYGSY
201 GRKQESEYGS GGYGRPEAE  YGSGYGRPE  TEYGGGGGSE  YGGGYGRKPS
251 YGEEGGYGER  TEYERPSYGD  DPPRRPGYGR  QDDEYERPSY  ERKSDDDNDG
301 SRRKYGGDDD  EKGYQKKYGG  YGDDDDEEGS  RRKYGYGGEE  ESYGRKKYGD
351 DGSDDDEKHH  HRHKHHQHKH  SDDE
```



Spot No.: **P52**

NCBI accession No.: **gi|255552291** Species: *Ricinus communis*

**PFF** score: **[67]**

Protein name: **short chain dehydrogenase, putative**

Matched peptides No.: **[3]** Sequence coverage %: **[11]**

Matched sequences: **K.VALVTGGDSGIGR.A;**

**K.AEGAKDPIAIPTDVGFEEENCR.K;**

**K.DPIAIPTDVGFEEENCR.K**

Calculated Mr: **32148**

Calculated *pI*: **6.50**

### Probability Based Mowse Score:

Ions score is  $-10 \cdot \log(P)$ , where *P* is the probability that the observed match is a random event. Individual ions scores > 45 indicate identity or extensive homology ( $p < 0.05$ ). Protein scores are derived from ions scores as a non-probabilistic basis for ranking protein hits.

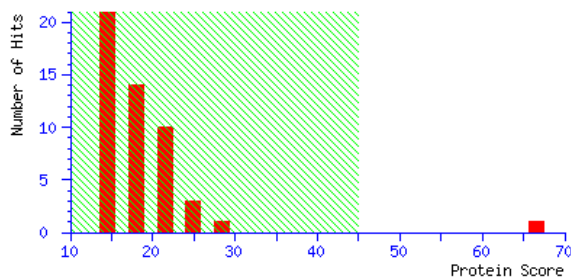

Matched peptide sequences: shown in **Bold Red**:

```
1 MATRRGYRFP PQSQDKQPGK EYLMHPLPEF INPHYKPSNK LQDKVALVTG
51 GDSGIGRAVS YYFTLEGATV AFTYVKGRED KDKDHILKIL HEVKAEGARD
101 PIAIPTDVGF EENCRKVIDQ IMSEYGKIDI LVNNAGEAHY STTIEDITDP
151 MLERVFRTNI FGFFMSRHA LKHMKEGGCI INTASVAAYA GFSFMVDYSS
201 TKGAVVAFTR SLALQLIDRG IRVNAVAPGS VWTFFQPSL SAEQVAQVGS
251 GVPMDRAAQP YEIAPSFVFL ASNDCSSYFT GQVLHPNGMF
```



Spot No.: **P53**

NCBI accession No.: **gi|224057068** Species: *Populus trichocarpa*

**PFF** score: **[279]**

Protein name: **predicted protein**

Matched peptides No.: **[7]**

Sequence coverage %: **[35]**

Matched sequences: **K.CPDTNYLFMGDYVDR.G + Oxidation (M);**

**R.QITQVYGFYDECLR.K;**

**R.VQEVPHGPMCDLLWSDPDDR.C + Oxidation (M);**

**R.GAGYTFGQDISEQFNHTNNLK.L;**

**R.AHQLVMEGYNKGHEQK.V + Oxidation (M);**

**K.VVTIFSAPNYCYR.C;**

**K.GHTFIQFEPAPR.R**

Calculated Mr: **36330**

Calculated pI: **5.08**

Probability Based Mowse Score:

Ions score is  $-10 \cdot \log(P)$ , where P is the probability that the observed match is a random event. Individual ions scores  $> 45$  indicate identity or extensive homology ( $p < 0.05$ ). Protein scores are derived from ions scores as a non-probabilistic basis for ranking protein hits.

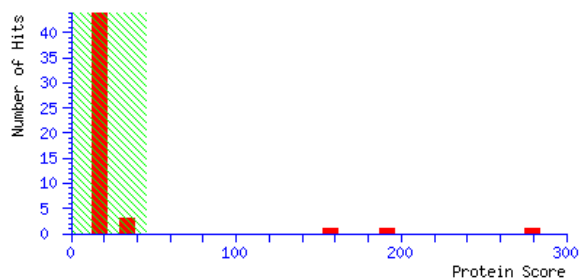

Matched peptide sequences: shown in **Bold Red**:

```
1  MSLDSVATNA  HGNLDEEISQ  LMQCKPLSEQ  EVRALCEKAK  EILMDESNVQ
51  PVKSPVTICG  DIHQFHDLA  ELFRIGGKCP DTNYLFMGDY VDRGGYYSVET
101 VLLVALKVR  YPQRITILRG  NHESRQITQV YGFYDECLRK YGNANVWKIF
151 TDLFDYFPLT  ALVESEIFCL  HGGLSPSIET  LDNIRNFDRV  QEVPHGPMC
201 DLLWSDPDDR  CGWGISPRGA  GYTFGQDISE QFNHTNNLKL  IARAHQLVME
251 GYNKGHEQKV VTIFSAPNYC YRCGNMASIL  EVDDCKGHTF IQFEPAPRRG
301 EPDVTRRTPD  YFL
```

Spot No.: **P54**

NCBI accession No.: **gi|2832430** Species: *Hevea brasiliensis*

**PFF** score: **[181]**

Protein name: **prohevein**

Matched peptides No.: **[3]** Sequence coverage %: **[26]**

Matched sequences: **K.YGWTAFCGPVGAHGQPSCK.K;**

**R.IVDQCSNGGLDLVDNVFR.Q;**

**R.QLDTDGKGYER.G**

Calculated Mr: **20852**

Calculated pI: **5.64**

### Probability Based Mowse Score:

Ions score is  $-10 \cdot \log(P)$ , where P is the probability that the observed match is a random event. Individual ions scores  $> 44$  indicate identity or extensive homology ( $p < 0.05$ ). Protein scores are derived from ions scores as a non-probabilistic basis for ranking protein hits.

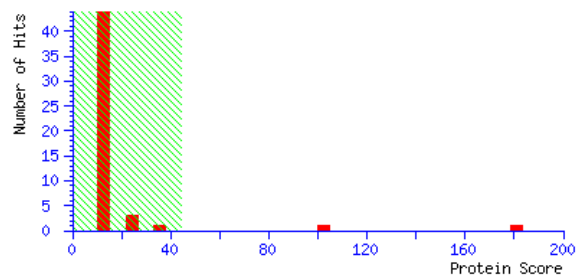

Matched peptide sequences: shown in **Bold Red**:

```
1  EQCGRQAGGK LCPNNLCCSQ WGWCGSTDEY CSPDHNCQSN CKDSGEGVGG
51  GSASNVLATY HLYNSQDHGW DLNAASAYCS TWDANKPYSW RSKYGWTAFC
101 GPVGAHGQPS CGKCLSVTNT GTGAKATVRI VDQCSNGGLD LDVNVFRQLD
151 TDGKGYERGH LTVNYQFVDC GDSFNPLFSV MKSSVIN
```

Spot No.: **P55**

NCBI accession No.: **gi|224071449** Species: *Populus trichocarpa*

**PFF** score: **[55]**

Protein name: **predicted protein**

Matched peptides No.: **[2]**

Sequence coverage %: **[2]**

Matched sequences: **K.NKIDVIPHYPGR.L;**

**K.IDVIPHYPGR.L**

Calculated Mr: **47121**

Calculated pl: **5.28**

### Probability Based Mowse Score:

Ions score is  $-10 \cdot \log(P)$ , where P is the probability that the observed match is a random event.

Individual ions scores  $> 45$  indicate identity or extensive homology ( $p < 0.05$ ).

Protein scores are derived from ions scores as a non-probabilistic basis for ranking protein hits.

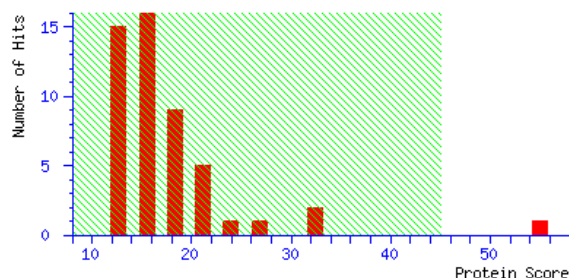

Matched peptide sequences: shown in **Bold Red**:

```
1 MDGTSEATWP EILGSRNWDN LLDPLDLSLR KLILRCGDFC QATYDAFNND
51 QNSRYCGTSR YGKRNFHFKV MLDNPENYQV SSFLYATARV SLPEAFLLHS
101 LSRDSDRET NWIGYIAVTS DEQTKTLGRR EIYIAFRGTT RNYEVDILG
151 AKLKSAPLL RGATSTTHDQ ESSSSDDDD DKVPKVMLGW LTMYSISDDPN
201 SPFTKLSARA QLLAHIKELR ERYKDDLSI IFTGHSLGAS LSILSAFDLV
251 ENGITDIPVS AFVFGSPQVG NKEFNERFNK YPNLKVLIHK NKIDVIPHYP
301 GRLMGYVYTG IEFEIDTRKS PSLKDSKNPS DWHNLQAMLH IVAGWNGEEQ
351 EFELKVKRSL ALVNKSSEFL KDECLVPGIW WVEKNKGMVR NEDGEWVLAP
401 PDEEDLPVPE C
```

Spot No.: **P56**

NCBI accession No.: **gi|218157** Species: *Oryza sativa Japonica Group*

**PFF** score: **[58]**

Protein name: **cytoplasmic aldolase**

Matched peptides No.: **[2]**

Sequence coverage %: **[3]**

Matched sequences: **K.KVAPEVIAEYTVR.T;**

**K.VAPEVIAEYTVR.T**

Calculated Mr: **39151**

Calculated pI: **6.56**

Probability Based Mowse Score:

Ions score is  $-10 \cdot \log(P)$ , where P is the probability that the observed match is a random event. Individual ions scores  $> 46$  indicate identity or extensive homology ( $p < 0.05$ ). Protein scores are derived from ions scores as a non-probabilistic basis for ranking protein hits.

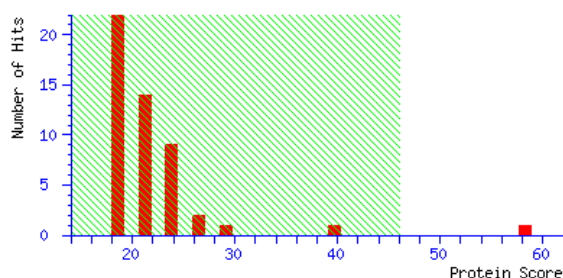

Matched peptide sequences: shown in **Bold Red**:

```
1 MSAYCGKYKD ELIKNAAYIG TPGKGILAAD ESTGTIGKRF ASINVENVED
51 NRRAFRELLF CTPGALQYIS GVILFDETLY QKTKDGKPFV DILKEAGALP
101 GIKVDKGTIE VAGTDKETT QGHDDLKQVC AKYYEAGARF AKWRAVLKIG
151 PNQPSQLAID LNAQGLACYA IICQENGLVP IVEPEILVDG PHDIDRCAYV
201 SEVVLAACYK ALNEHHVLE GTLLKPNMVT PGSDAKKVAP EVIAEYTVRT
251 LQRTVPPAVP AIVFLSGGQS EEEATLNLNA MNKLSAKKPW SLSFSFGRAL
301 QQSTLKAWAG KTENVEKARA AFLVRCKANS EATLGTYKGD AVLGEGAAES
351 LHVVDYKY
```

Spot No.: **P57**

NCBI accession No.: **gi|15219412** Species: *Arabidopsis thaliana*

**PFF** score: **[120]**

Protein name: **phosphoglycerate kinase**

Matched peptides No.: **[3]** Sequence coverage %: **[6]**

Matched sequences: **K.YSLKPLVPR.L;**

**K.KLAALADVYVNDAFGTAHR.A;**

**K.LAALADVYVNDAFGTAHR.A**

Calculated Mr: **42162**

Calculated pI: **5.49**

Probability Based Mowse Score:

Ions score is  $-10 \cdot \log(P)$ , where P is the probability that the observed match is a random event. Individual ions scores  $> 45$  indicate identity or extensive homology ( $p < 0.05$ ). Protein scores are derived from ions scores as a non-probabilistic basis for ranking protein hits.

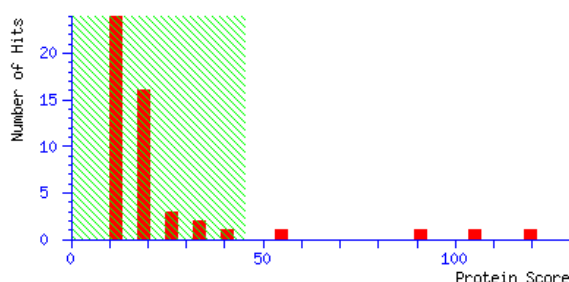

Matched peptide sequences: shown in **Bold Red**:

```
1  MATKRSVGTL  KEADLKGKSV  FVRVDLNVPL  DDNSNITDDT  RIRAAVPTIK
51  YLMGNGSRVY  LCSHLGRPKG  VTPKYSLKPL  VPRLSELLGV  EVVMANDSIG
101 EEVQQLVAGL  PEGGVLLLEN  VRFYAEEEKN  DPEFAKKLAA  LADVYVNDAF
151 GTAHRAHAST  EGVAKFLKPS  VAGFLMQKEL  DYLVGAVANP  KKPFAAIVGG
201 SKVSTKIGVI  ESSLNTVDIL  LLGGGMIFTF  YKAQGLSVGS  SLVEEDKLDL
251 AKSLMEKAKA  KGVSLLLPTD  VVIADKFAPD  ANSKIVPATA  IPDGWMGLDI
301 GPDSIKTFSE  ALDTTKTIIW  NGPMGVFEFD  KFAAGTEAVA  KQLAELSGKG
351 VTTIIGGGDS  VAAVEKVGLA  DKMSHISTGG  GASLELLEGG  PLPGVLALDE
401 A
```

Spot No.: **P58**

NCBI accession No.: **gi|356513072** Species: *Glycine max*

**PFF** score: **[121]**

Protein name: **phosphoglucomutase,cytoplasmic-like**

Matched peptides No.: **[4]** Sequence coverage %: **[6]**

Matched sequences: **R.VETTPFDGQKPGTSGLR.K;**

**K.SIFDFESIR.K;**

**K.SIFDFESIRK.L;**

**K.LVTVEDIVR.Q**

Calculated Mr: **63702**

Calculated pI: **5.33**

Probability Based Mowse Score:

Ions score is  $-10 \cdot \log(P)$ , where P is the probability that the observed match is a random event. Individual ions scores  $> 45$  indicate identity or extensive homology ( $p < 0.05$ ). Protein scores are derived from ions scores as a non-probabilistic basis for ranking protein hits.

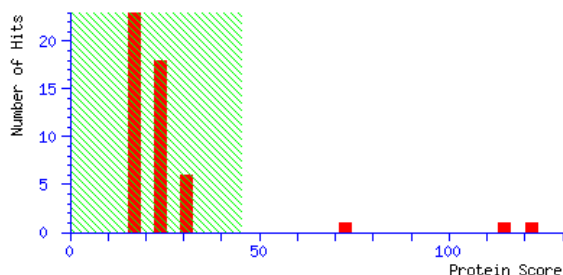

Matched peptide sequences: shown in **Bold Red**:

```
1  MVLFNVSRVETTPFDGQKPG TSGLRKKVKV  FVQPHYLHNF  VQSTFNALTV
51  EKVRGATLVV  SGDGRYFSKE  AIQIITKMSA  ANGVRRVWIG  QNGLLSTPAV
101 SAVIRERVGA  DGSRATGAFI  LTASHNPGGP  HEDFGIKYNM  ENGGPAPEGI
151 TDKIYENTTT  INEYLIASDL  PDVDITTTGV  TSFTGPEGPF  DVEVFDSASD
201 YIKLMKSIFDFESIRKLLSS  PKFTFCYDAL  HGVGGAYAKS  IFVDELGAQE
251 SLLNCTPKE  DFGGGHPDPN  LTYAKELVAR  MGLGKSEPQD  DPPEFGAASD
301 GDADRNMILG  KRFFVTPSDS  VAIIAANAVE  AIPYFSAGLK  GVARSMPTSA
351 ALDVVAKHLN  LKFFEVPTGW  KFFGNLMDAG  LCSVCGEESF  GTGSDHIREK
401 DGIWAVLAWL  SILAYKNKDK  LEDKLVTVED  IVRQHWATYG  RHYTRYDYE
451 NVDAGAAKEL  MAYLVKLQSS  LSEVNQIIKG  IRSDVSNVVH  GDEFYNDPV
501 DGSISSHQGI  RYLFEDGSRL  IFRLSGTGSE  GATIRLYIEQ  YEKDPSKIGR
551 LSNEALAPLV  EVALKLSKME  EFTGRSAPTV  IT
```

Spot No.: **P59**

NCBI accession No.: **gi|255568794** Species: *Ricinus communis*

**PFF** score: **[95]**

Protein name: **nucleoredoxin, putative**

Matched peptides No.: **[3]** Sequence coverage %: **[5]**

Matched sequences: **R.VEYFRQEEENAK.K;**

**K.LIEAYHEIK.A;**

**K.KCDFDLHPK.C**

Calculated Mr: **63728**

Calculated pI: **5.46**

### Probability Based Mowse Score:

Ions score is  $-10 \cdot \log(P)$ , where P is the probability that the observed match is a random event. Individual ions scores  $> 45$  indicate identity or extensive homology ( $p < 0.05$ ). Protein scores are derived from ions scores as a non-probabilistic basis for ranking protein hits.

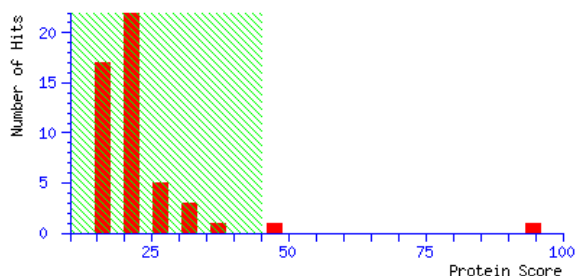

Matched peptide sequences: shown in **Bold Red**:

```
1  MADDPVIDVS  HDLLSLLSSD  DRDFLIRSNG  DQVKISNLVG  KIVGLYFSGS
51  WCGPCRHFTP  NLVQVYEELS  LKGDFFVFI  SDDRDAESFD  AYFSKMPWLA
101 IPFSDQETCK  HLKDLFKVRG  IPNLVFLDAD  GKVSCDQGVR  FIREYGAEGY
151 PFTPERVEYF RQEEENAKKN  QTLSSILVSS  SRDFLISKDG  TKIPVSELEG
201 KMVGLYFSVH  SHRLCLDFTP  RLEEVYKKLK  EKGEKFEVVL  ISMDYDENNF
251 KQGLETMPWL  ALPFEDKSRE  RLARYFELSA  LPTLVIIGED  GKTLNKNVAE
301 LIEGHGIQAY  PFTPEKLVEL  AEIEKARLEA  QTLESVLVHG  DKDFVIEESG
351 SKVPVSELVG  KNILLYFSAK  WCPPCRAFLP  KLIEAYHEIK  AKDNAFEIIF
401 ISSDRDQSSF  DEFYTEMPWL  ALPFGDDRKT  ILQRKFKIKG  IPAAIAISPT
451 GKTLTKEARE  HITAYGADAY  PFNEDHLKQL  NDKQEETIAG  WPEKVRHELH
501 PEHELVRMKR  NGYGCDGCKE  AGSGWSFYCK  KCDFDLHPKC  ALKKEENGEK
551 VKK
```

## Determination of the phosphorylated amino sites of small rubber particle protein (SRPP) in protein spot P6.

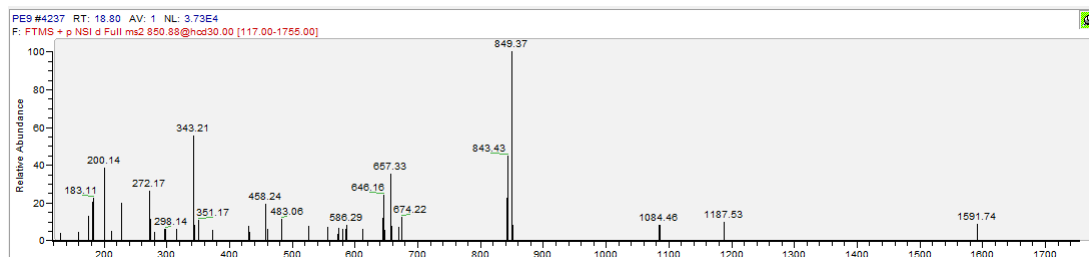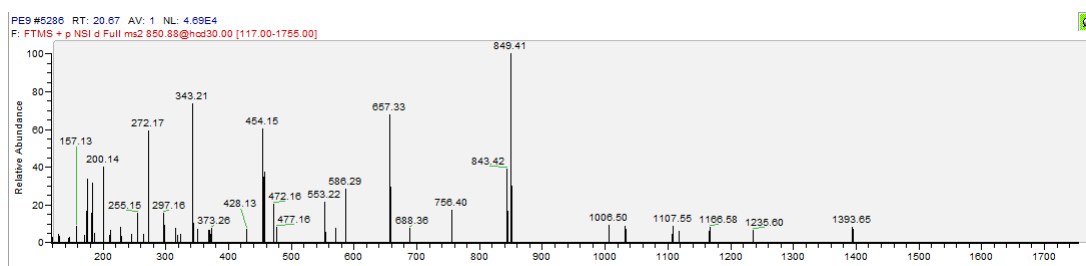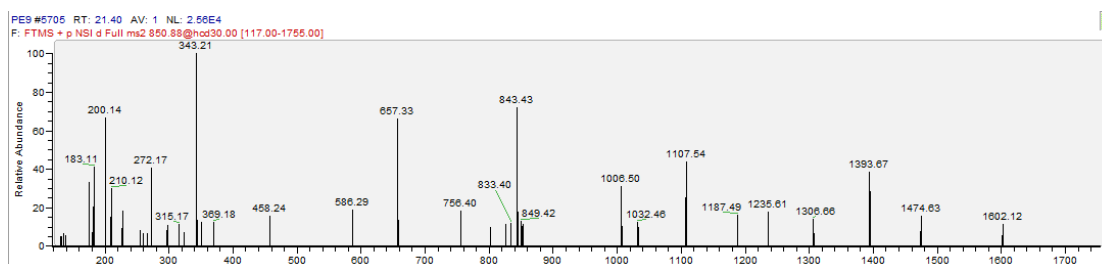

### MS/MS Fragmentation of QVSpAQTYpSVAQDAPR

| #  | b               | b <sup>++</sup> | b*        | b* <sup>++</sup> | b <sup>0</sup> | b <sup>0++</sup> | Seq. | y                | y <sup>++</sup> | y*        | y* <sup>++</sup> | y <sup>0</sup> | y <sup>0++</sup> | #  |
|----|-----------------|-----------------|-----------|------------------|----------------|------------------|------|------------------|-----------------|-----------|------------------|----------------|------------------|----|
| 1  | 129.0659        | 65.0366         | 112.0393  | 56.5233          |                |                  | Q    |                  |                 |           |                  |                |                  | 15 |
| 2  | <b>228.1343</b> | 114.5708        | 211.1077  | 106.0575         |                |                  | V    | 1572.7054        | 786.8563        | 1555.6788 | 778.3431         | 1554.6948      | 777.8510         | 14 |
| 3  | 315.1663        | 158.0868        | 298.1397  | 149.5735         | 297.1557       | 149.0815         | S    | 1473.6370        | 737.3221        | 1456.6104 | 728.8088         | 1455.6264      | 728.3168         | 13 |
| 4  | 386.2034        | 193.6053        | 369.1769  | 185.0921         | 368.1928       | 184.6001         | A    | 1386.6049        | 693.8061        | 1369.5784 | 685.2928         | 1368.5944      | 684.8008         | 12 |
| 5  | 514.2620        | 257.6346        | 497.2354  | 249.1214         | 496.2514       | 248.6293         | Q    | 1315.5678        | 658.2876        | 1298.5413 | 649.7743         | 1297.5573      | 649.2823         | 11 |
| 6  | 615.3097        | 308.1585        | 598.2831  | 299.6452         | 597.2991       | 299.1532         | T    | <b>1187.5092</b> | 594.2583        | 1170.4827 | 585.7450         | 1169.4987      | 585.2530         | 10 |
| 7  | 858.3393        | 429.6733        | 841.3128  | 421.1600         | 840.3288       | 420.6680         | Y    | 1086.4616        | 543.7344        | 1069.4350 | 535.2211         | 1068.4510      | 534.7291         | 9  |
| 8  | 945.3714        | 473.1893        | 928.3448  | 464.6760         | 927.3608       | 464.1840         | S    | <b>843.4319</b>  | 422.2196        | 826.4054  | 413.7063         | 825.4213       | 413.2143         | 8  |
| 9  | 1044.4398       | 522.7235        | 1027.4132 | 514.2102         | 1026.4292      | 513.7182         | V    | 756.3999         | 378.7036        | 739.3733  | 370.1903         | 738.3893       | 369.6983         | 7  |
| 10 | 1115.4769       | 558.2421        | 1098.4503 | 549.7288         | 1097.4663      | 549.2368         | A    | <b>657.3315</b>  | 329.1694        | 640.3049  | 320.6561         | 639.3209       | 320.1641         | 6  |
| 11 | 1243.5355       | 622.2714        | 1226.5089 | 613.7581         | 1225.5249      | 613.2661         | Q    | <b>586.2944</b>  | 293.6508        | 569.2678  | 285.1375         | 568.2838       | 284.6455         | 5  |
| 12 | 1358.5624       | 679.7848        | 1341.5359 | 671.2716         | 1340.5518      | 670.7796         | D    | <b>458.2358</b>  | 229.6215        | 441.2092  | 221.1083         | 440.2252       | 220.6162         | 4  |
| 13 | 1429.5995       | 715.3034        | 1412.5730 | 706.7901         | 1411.5890      | 706.2981         | A    | <b>343.2088</b>  | 172.1081        | 326.1823  | 163.5948         |                |                  | 3  |
| 14 | 1526.6523       | 763.8298        | 1509.6257 | 755.3165         | 1508.6417      | 754.8245         | P    | <b>272.1717</b>  | 136.5895        | 255.1452  | 128.0762         |                |                  | 2  |
| 15 |                 |                 |           |                  |                |                  | R    | 175.1190         | 88.0631         | 158.0924  | 79.5498          |                |                  | 1  |



| #  | b               | b <sup>++</sup> | b*        | b* <sup>++</sup> | b <sup>0</sup> | b <sup>0++</sup> | Seq. | y                | y <sup>++</sup> | y*              | y* <sup>++</sup> | y <sup>0</sup> | y <sup>0++</sup> | #  |
|----|-----------------|-----------------|-----------|------------------|----------------|------------------|------|------------------|-----------------|-----------------|------------------|----------------|------------------|----|
| 1  | 129.0659        | 65.0366         | 112.0393  | 56.5233          |                |                  | Q    |                  |                 |                 |                  |                |                  | 15 |
| 2  | 228.1343        | 114.5708        | 211.1077  | 106.0575         |                |                  | V    | 1474.7285        | 737.8679        | 1457.7019       | 729.3546         | 1456.7179      | 728.8626         | 14 |
| 3  | <b>297.1557</b> | 149.0815        | 280.1292  | 140.5682         | 279.1452       | 140.0762         | S    | 1375.6601        | 688.3337        | 1358.6335       | 679.8204         | 1357.6495      | 679.3284         | 13 |
| 4  | 368.1928        | 184.6001        | 351.1663  | 176.0868         | 350.1823       | 175.5948         | A    | 1306.6386        | 653.8229        | 1289.6121       | 645.3097         | 1288.6280      | 644.8177         | 12 |
| 5  | 496.2514        | 248.6293        | 479.2249  | 240.1161         | 478.2409       | 239.6241         | Q    | <b>1235.6015</b> | 618.3044        | 1218.5749       | 609.7911         | 1217.5909      | 609.2991         | 11 |
| 6  | 597.2991        | 299.1532        | 580.2726  | 290.6399         | 579.2885       | 290.1479         | T    | <b>1107.5429</b> | 554.2751        | 1090.5164       | 545.7618         | 1089.5324      | 545.2698         | 10 |
| 7  | 760.3624        | 380.6849        | 743.3359  | 372.1716         | 742.3519       | 371.6796         | Y    | <b>1006.4952</b> | 503.7513        | 989.4687        | 495.2380         | 988.4847       | 494.7460         | 9  |
| 8  | 847.3945        | 424.2009        | 830.3679  | 415.6876         | 829.3839       | 415.1956         | S    | <b>843.4319</b>  | 422.2196        | 826.4054        | 413.7063         | 825.4213       | 413.2143         | 8  |
| 9  | 946.4629        | 473.7351        | 929.4363  | 465.2218         | 928.4523       | 464.7298         | V    | <b>756.3999</b>  | 378.7036        | 739.3733        | 370.1903         | 738.3893       | 369.6983         | 7  |
| 10 | 1017.5000       | 509.2536        | 1000.4734 | 500.7404         | 999.4894       | 500.2483         | A    | <b>657.3315</b>  | 329.1694        | 640.3049        | 320.6561         | 639.3209       | 320.1641         | 6  |
| 11 | 1145.5586       | 573.2829        | 1128.5320 | 564.7696         | 1127.5480      | 564.2776         | Q    | <b>586.2944</b>  | 293.6508        | 569.2678        | 285.1375         | 568.2838       | 284.6455         | 5  |
| 12 | 1260.5855       | 630.7964        | 1243.5590 | 622.2831         | 1242.5749      | 621.7911         | D    | <b>458.2358</b>  | 229.6215        | 441.2092        | 221.1083         | 440.2252       | 220.6162         | 4  |
| 13 | 1331.6226       | 666.3149        | 1314.5961 | 657.8017         | 1313.6121      | 657.3097         | A    | <b>343.2088</b>  | 172.1081        | 326.1823        | 163.5948         |                |                  | 3  |
| 14 | 1428.6754       | 714.8413        | 1411.6488 | 706.3281         | 1410.6648      | 705.8360         | P    | <b>272.1717</b>  | 136.5895        | <b>255.1452</b> | 128.0762         |                |                  | 2  |
| 15 |                 |                 |           |                  |                |                  | R    | <b>175.1190</b>  | 88.0631         | 158.0924        | 79.5498          |                |                  | 1  |

| #  | b         | b <sup>++</sup> | b*        | b* <sup>++</sup> | b <sup>0</sup> | b <sup>0++</sup> | Seq. | y                | y <sup>++</sup> | y*        | y* <sup>++</sup> | y <sup>0</sup> | y <sup>0++</sup> | #  |
|----|-----------|-----------------|-----------|------------------|----------------|------------------|------|------------------|-----------------|-----------|------------------|----------------|------------------|----|
| 1  | 129.0659  | 65.0366         | 112.0393  | 56.5233          |                |                  | Q    |                  |                 |           |                  |                |                  | 15 |
| 2  | 228.1343  | 114.5708        | 211.1077  | 106.0575         |                |                  | V    | 1572.7054        | 786.8563        | 1555.6788 | 778.3431         | 1554.6948      | 777.8510         | 14 |
| 3  | 395.1326  | 198.0700        | 378.1061  | 189.5567         | 377.1221       | 189.0647         | S    | 1473.6370        | 737.3221        | 1456.6104 | 728.8088         | 1455.6264      | 728.3168         | 13 |
| 4  | 466.1697  | 233.5885        | 449.1432  | 225.0752         | 448.1592       | 224.5832         | A    | 1306.6386        | 653.8229        | 1289.6121 | 645.3097         | 1288.6280      | 644.8177         | 12 |
| 5  | 594.2283  | 297.6178        | 577.2018  | 289.1045         | 576.2178       | 288.6125         | Q    | <b>1235.6015</b> | 618.3044        | 1218.5749 | 609.7911         | 1217.5909      | 609.2991         | 11 |
| 6  | 695.2760  | 348.1416        | 678.2494  | 339.6284         | 677.2654       | 339.1364         | T    | <b>1107.5429</b> | 554.2751        | 1090.5164 | 545.7618         | 1089.5324      | 545.2698         | 10 |
| 7  | 858.3393  | 429.6733        | 841.3128  | 421.1600         | 840.3288       | 420.6680         | Y    | <b>1006.4952</b> | 503.7513        | 989.4687  | 495.2380         | 988.4847       | 494.7460         | 9  |
| 8  | 945.3714  | 473.1893        | 928.3448  | 464.6760         | 927.3608       | 464.1840         | S    | <b>843.4319</b>  | 422.2196        | 826.4054  | 413.7063         | 825.4213       | 413.2143         | 8  |
| 9  | 1044.4398 | 522.7235        | 1027.4132 | 514.2102         | 1026.4292      | 513.7182         | V    | <b>756.3999</b>  | 378.7036        | 739.3733  | 370.1903         | 738.3893       | 369.6983         | 7  |
| 10 | 1115.4769 | 558.2421        | 1098.4503 | 549.7288         | 1097.4663      | 549.2368         | A    | <b>657.3315</b>  | 329.1694        | 640.3049  | 320.6561         | 639.3209       | 320.1641         | 6  |
| 11 | 1243.5355 | 622.2714        | 1226.5089 | 613.7581         | 1225.5249      | 613.2661         | Q    | <b>586.2944</b>  | 293.6508        | 569.2678  | 285.1375         | 568.2838       | 284.6455         | 5  |
| 12 | 1358.5624 | 679.7848        | 1341.5359 | 671.2716         | 1340.5518      | 670.7796         | D    | <b>458.2358</b>  | 229.6215        | 441.2092  | 221.1083         | 440.2252       | 220.6162         | 4  |
| 13 | 1429.5995 | 715.3034        | 1412.5730 | 706.7901         | 1411.5890      | 706.2981         | A    | <b>343.2088</b>  | 172.1081        | 326.1823  | 163.5948         |                |                  | 3  |
| 14 | 1526.6523 | 763.8298        | 1509.6257 | 755.3165         | 1508.6417      | 754.8245         | P    | <b>272.1717</b>  | 136.5895        | 255.1452  | 128.0762         |                |                  | 2  |
| 15 |           |                 |           |                  |                |                  | R    | 175.1190         | 88.0631         | 158.0924  | 79.5498          |                |                  | 1  |

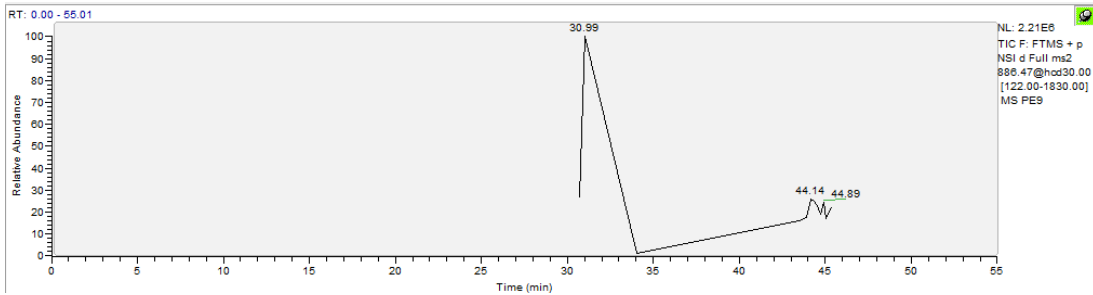

PE9 #11000 RT: 30.71 AV: 1 NL: 3.75E4  
F: FTMS + p NSI d Full ms2 886.47@hcd30.00 [122.00-1830.00]

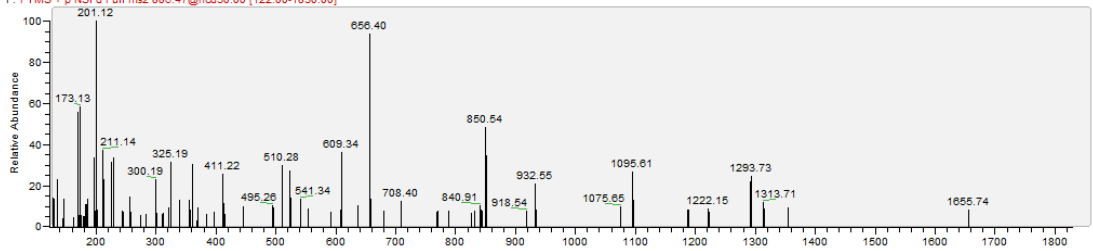

PE9 #11164 RT: 30.99 AV: 1 NL: 2.31E5  
F: FTMS + p NSI d Full ms2 886.47@hcd30.00 [122.00-1830.00]

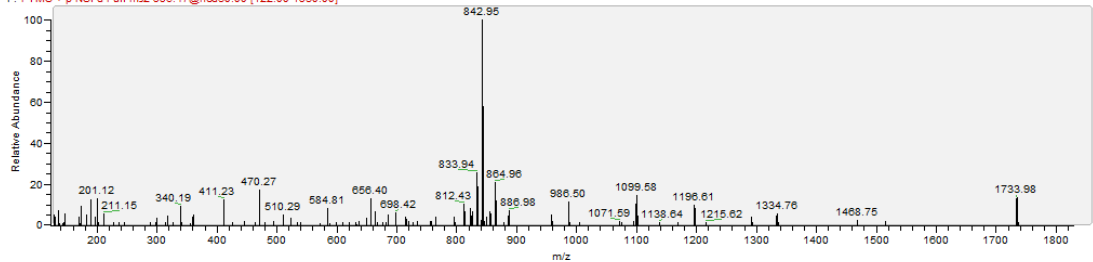

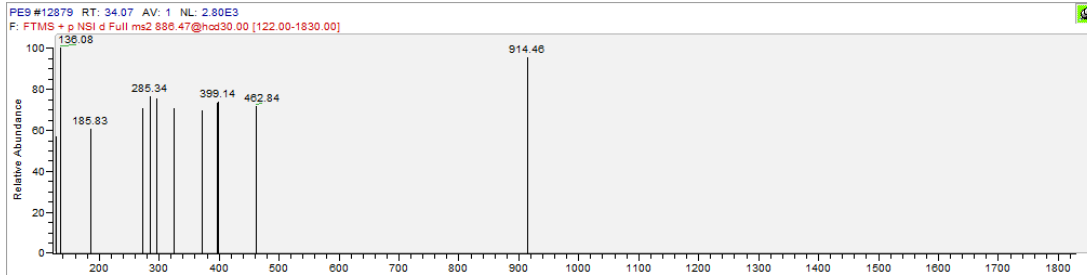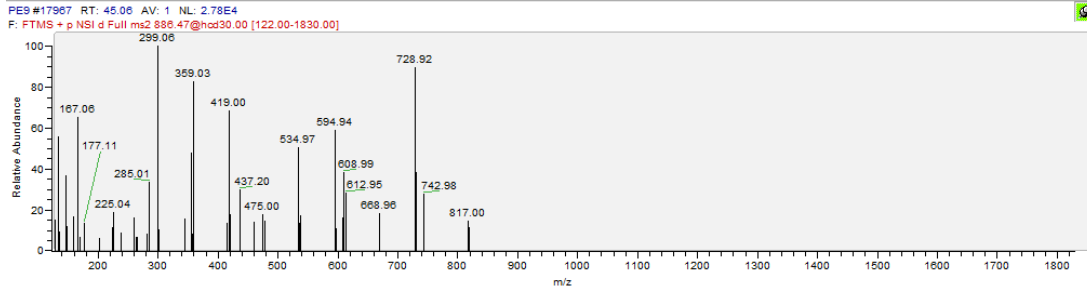

### MS/MS Fragmentation of TVVTpPVYYIPLEAVK

| #  | b         | b <sup>++</sup> | b <sup>0</sup> | b <sup>0++</sup> | Seq. | y         | y <sup>++</sup> | y*        | y <sup>*++</sup> | y <sup>0</sup> | y <sup>0++</sup> | #  |
|----|-----------|-----------------|----------------|------------------|------|-----------|-----------------|-----------|------------------|----------------|------------------|----|
| 1  | 102.0550  | 51.5311         | 84.0444        | 42.5258          | T    |           |                 |           |                  |                |                  | 15 |
| 2  | 201.1234  | 101.0653        | 183.1128       | 92.0600          | V    | 1670.8805 | 835.9439        | 1653.8539 | 827.4306         | 1652.8699      | 826.9386         | 14 |
| 3  | 300.1918  | 150.5995        | 282.1812       | 141.5942         | V    | 1571.8121 | 786.4097        | 1554.7855 | 777.8964         | 1553.8015      | 777.4044         | 13 |
| 4  | 481.2058  | 241.1065        | 463.1952       | 232.1013         | T    | 1472.7437 | 736.8755        | 1455.7171 | 728.3622         | 1454.7331      | 727.8702         | 12 |
| 5  | 578.2586  | 289.6329        | 560.2480       | 280.6276         | P    | 1291.7297 | 646.3685        | 1274.7031 | 637.8552         | 1273.7191      | 637.3632         | 11 |
| 6  | 677.3270  | 339.1671        | 659.3164       | 330.1618         | V    | 1194.6769 | 597.8421        | 1177.6503 | 589.3288         | 1176.6663      | 588.8368         | 10 |
| 7  | 840.3903  | 420.6988        | 822.3797       | 411.6935         | Y    | 1095.6085 | 548.3079        | 1078.5819 | 539.7946         | 1077.5979      | 539.3026         | 9  |
| 8  | 1003.4536 | 502.2305        | 985.4431       | 493.2252         | Y    | 932.5451  | 466.7762        | 915.5186  | 458.2629         | 914.5346       | 457.7709         | 8  |
| 9  | 1116.5377 | 558.7725        | 1098.5271      | 549.7672         | I    | 769.4818  | 385.2445        | 752.4553  | 376.7313         | 751.4713       | 376.2393         | 7  |
| 10 | 1213.5905 | 607.2989        | 1195.5799      | 598.2936         | P    | 656.3978  | 328.7025        | 639.3712  | 320.1892         | 638.3872       | 319.6972         | 6  |
| 11 | 1326.6745 | 663.8409        | 1308.6640      | 654.8356         | L    | 559.3450  | 280.1761        | 542.3184  | 271.6629         | 541.3344       | 271.1708         | 5  |
| 12 | 1455.7171 | 728.3622        | 1437.7065      | 719.3569         | E    | 446.2609  | 223.6341        | 429.2344  | 215.1208         | 428.2504       | 214.6288         | 4  |
| 13 | 1526.7542 | 763.8808        | 1508.7437      | 754.8755         | A    | 317.2183  | 159.1128        | 300.1918  | 150.5995         |                |                  | 3  |
| 14 | 1625.8226 | 813.4150        | 1607.8121      | 804.4097         | V    | 246.1812  | 123.5942        | 229.1547  | 115.0810         |                |                  | 2  |
| 15 |           |                 |                |                  | K    | 147.1128  | 74.0600         | 130.0863  | 65.5468          |                |                  | 1  |

**Peptide View**MS/MS Fragmentation of **QVSAQTYSVAQDAPR**Found in **SRPP\_HEVBR** in **SwissProt**, Small rubber particle protein OS=Hevea brasiliensis  
GN=SRPP PE=1 SV=1Match to Query 9859: 1699.749968 from(850.882260,2+) intensity(277497.1200) scans(5705)  
rawscans(sn5705) rtinseconds(1283.9872) index(3303)

Title: 3304: Scan 5705 (rt=1283.99)

Data file tempfile

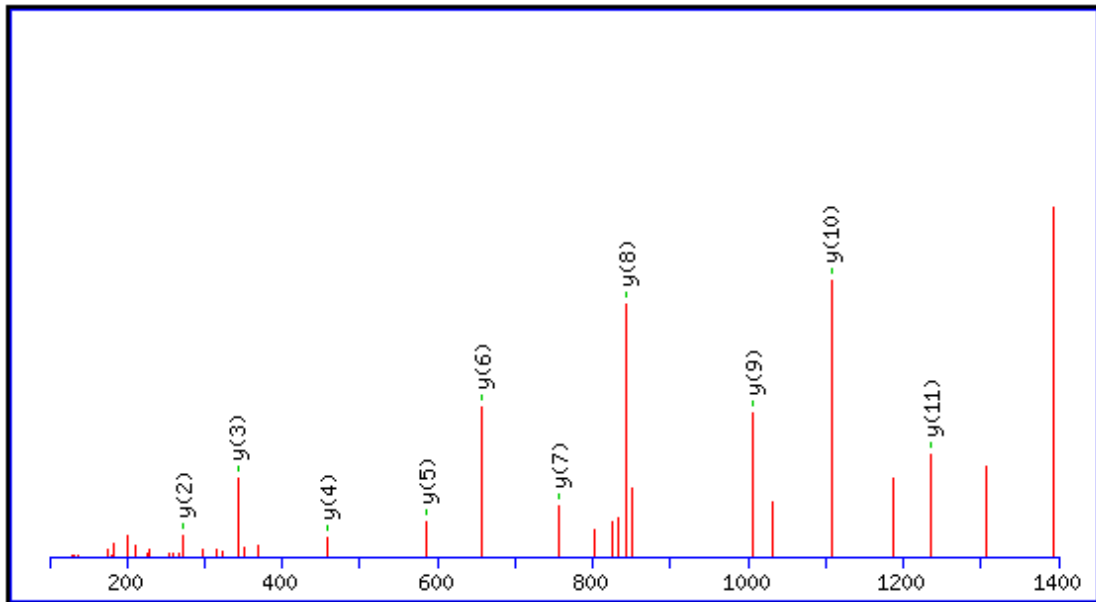Monoisotopic mass of neutral peptide **Mr(calc)**: 1699.7567**Fixed modifications**: Carbamidomethyl (C) (apply to specified residues or termini only)**Variable modifications**:**S3** : Phospho (ST), with neutral losses 0.0000 (shown in table),  
97.9769**Ions Score**: 91 **Expect**: 2.8e-009**Matches** : 10/242 fragment ions using 13 most intense peaks

| #  | b         | b <sup>++</sup> | b*        | b <sup>+++</sup> | b <sup>0</sup> | b <sup>0++</sup> | Seq. | y                | y <sup>++</sup> | y*        | y <sup>+++</sup> | y <sup>0</sup> | y <sup>0++</sup> | #  |
|----|-----------|-----------------|-----------|------------------|----------------|------------------|------|------------------|-----------------|-----------|------------------|----------------|------------------|----|
| 1  | 129.0659  | 65.0366         | 112.0393  | 56.5233          |                |                  | Q    |                  |                 |           |                  |                |                  | 15 |
| 2  | 228.1343  | 114.5708        | 211.1077  | 106.0575         |                |                  | V    | 1572.7054        | 786.8563        | 1555.6788 | 778.3431         | 1554.6948      | 777.8510         | 14 |
| 3  | 395.1326  | 198.0700        | 378.1061  | 189.5567         | 377.1221       | 189.0647         | S    | 1473.6370        | 737.3221        | 1456.6104 | 728.8088         | 1455.6264      | 728.3168         | 13 |
| 4  | 466.1697  | 233.5885        | 449.1432  | 225.0752         | 448.1592       | 224.5832         | A    | 1306.6386        | 653.8229        | 1289.6121 | 645.3097         | 1288.6280      | 644.8177         | 12 |
| 5  | 594.2283  | 297.6178        | 577.2018  | 289.1045         | 576.2178       | 288.6125         | Q    | <b>1235.6015</b> | 618.3044        | 1218.5749 | 609.7911         | 1217.5909      | 609.2991         | 11 |
| 6  | 695.2760  | 348.1416        | 678.2494  | 339.6284         | 677.2654       | 339.1364         | T    | <b>1107.5429</b> | 554.2751        | 1090.5164 | 545.7618         | 1089.5324      | 545.2698         | 10 |
| 7  | 858.3393  | 429.6733        | 841.3128  | 421.1600         | 840.3288       | 420.6680         | Y    | <b>1006.4952</b> | 503.7513        | 989.4687  | 495.2380         | 988.4847       | 494.7460         | 9  |
| 8  | 945.3714  | 473.1893        | 928.3448  | 464.6760         | 927.3608       | 464.1840         | S    | <b>843.4319</b>  | 422.2196        | 826.4054  | 413.7063         | 825.4213       | 413.2143         | 8  |
| 9  | 1044.4398 | 522.7235        | 1027.4132 | 514.2102         | 1026.4292      | 513.7182         | V    | <b>756.3999</b>  | 378.7036        | 739.3733  | 370.1903         | 738.3893       | 369.6983         | 7  |
| 10 | 1115.4769 | 558.2421        | 1098.4503 | 549.7288         | 1097.4663      | 549.2368         | A    | <b>657.3315</b>  | 329.1694        | 640.3049  | 320.6561         | 639.3209       | 320.1641         | 6  |
| 11 | 1243.5355 | 622.2714        | 1226.5089 | 613.7581         | 1225.5249      | 613.2661         | Q    | <b>586.2944</b>  | 293.6508        | 569.2678  | 285.1375         | 568.2838       | 284.6455         | 5  |
| 12 | 1358.5624 | 679.7848        | 1341.5359 | 671.2716         | 1340.5518      | 670.7796         | D    | <b>458.2358</b>  | 229.6215        | 441.2092  | 221.1083         | 440.2252       | 220.6162         | 4  |
| 13 | 1429.5995 | 715.3034        | 1412.5730 | 706.7901         | 1411.5890      | 706.2981         | A    | <b>343.2088</b>  | 172.1081        | 326.1823  | 163.5948         |                |                  | 3  |
| 14 | 1526.6523 | 763.8298        | 1509.6257 | 755.3165         | 1508.6417      | 754.8245         | P    | <b>272.1717</b>  | 136.5895        | 255.1452  | 128.0762         |                |                  | 2  |
| 15 |           |                 |           |                  |                |                  | R    | 175.1190         | 88.0631         | 158.0924  | 79.5498          |                |                  | 1  |

### All matches to this query

| Score | Mr (calc) | Delta   | Sequence                        | Site Analysis     |
|-------|-----------|---------|---------------------------------|-------------------|
| 91.2  | 1699.7567 | -0.0067 | <a href="#">QVSAQTYSVAQDAPR</a> | Phospho S3 98.48% |
| 73.0  | 1699.7567 | -0.0067 | <a href="#">QVSAQTYSVAQDAPR</a> | Phospho T6 1.48%  |
| 56.8  | 1699.7567 | -0.0067 | <a href="#">QVSAQTYSVAQDAPR</a> | Phospho Y7 0.04%  |
| 41.0  | 1699.7567 | -0.0067 | <a href="#">QVSAQTYSVAQDAPR</a> | Phospho S8 0.03%  |

## Supplementary Figure S6: Antibody information

**Antibody name:** WR-1

**Protein name:** sucrose transporter 3

**Plant species:** *Hevea brasiliensis*

**NCBI Accession No.:** gi |227809927

**Antibody tag sequence:** ISGMLVQPIVGYHSC

**Protein sequence:**

```
1 metdptkesk lpsseplppp pplvppppas sklrkivmva siaagiqfgw alqlsltpy
61 vllgiphtw aafiwlcpig sgmlvqipivg yhsdrctsrfgrrrrpfiagg alavavavfl
121 igyaadlgql sgdpvakspk praiavfvvg fwildvanm lqgpcralla dlsganqkkt
181 rianalysff mavgnvlgfa agsythlyki fpfttkacd vycanlkscf fisivllltl
241 tvlaliyvre kpwspergnt aagdeeeede gasessmpf fseifaslkn lqkpmwilll
301 vtclnwvawf pfilldtdwm grevyggdsn gnpvqvrllyd rgvragalgl mlnsvvlgtf
361 slgvevlara vggvkrwgi vnfilscflf mtiltkmae shrfatvvgg gatvplpppg
421 dvkagalalf avmgvpqait ysipfalasi fcntagagqg lslgvlhlsi vipqmvsvsv
481 sgpwdalfgg gnlpafvvgg vaaaasgifa ftllpsppd apsaktstrav taafh
```

**Gene sequence:**

```
1 atggagactg atcctacgaa agaatcaaaa ctcccctctt ctgaacctct tccacctct
61 ccgcccctag ttctccacc acccgctca agcaagctta gaaagattgt aatggtggcc
121 tccatagctg ctggtatcca gttggetgg gcttgccagc tctctcttt gacacctac
181 gttcagcttc ttggtatacc tcacacatgg gctgcttca tctggctatg tggaccatt
241 tcaggaatgc ttgcccagcc aattgctggc taccatagtg atcgttgccac ctcccgttt
301 ggccgtcgcc gcccttttat tgcaggcggg gcttgcccg ttgctgtagc tgtttcctt
361 atcggttatg ctgctgacct tggtaacte tctggtgacc ctgttgccaa gagccccaaa
421 ccacgagcta tagccgtgtt tctcgttggg ttctggattc ttgacgtcgc taataacatg
481 ctccagggtc cttgccgtgc tctctcgcc gatcttctg gtgccaatca gaagaagacg
541 cgtatagcta atgactgta ctctcttc atggccgtcg ggaacgttct tggctttgce
601 gctggatcct acactcattt atataaaata ttccattca caaagacgaa agcttggac
661 gtttactgtg caaatctgaa atctgtttc ttatctcca ttgtttgct ttaactctc
721 actgtattag ctctcattta cgttcgtgaa aagccttggg cccagagcg aggaaacacc
781 gctgccggtg acgaggagga ggaggacgag ggggcgtcgg agtcttctcc gatgccgttc
841 ttcagtgaga tatttgcate ttgaagaat ctgcaaaaac ccatgtggat cettctctg
901 gtgacgtgcc tgaactgggt tgcattggtt ccattctgt tgttcgatac tgattggatg
961 ggtagagagg tatacggcgg agattcaaac gaaatcccg tcaagtggag gttgtatgat
1021 cgtgggggtgc gcgctggtgc actgggtctg atgcttaact cgttggtttt ggggttcacc
```

1081 tcccttggtg tggaggtgct ggcgcgtgct gtcggaggag tgaaaagatt gtggggata  
1141 gtgaattca ttcttcatt ttgtttgtc atgacgatct tgatcaccaa aatggctgaa  
1201 tcccacagaa ggttcgccac cgtgggaggc ggcgccacgg ttccttgcc accacctgga  
1261 gacgtcaagg ctggtgcatt ggccttttt gcggtgatgg gtgtacctca agctataact  
1321 tacagtattc cttttgcttt ggcatcaata tttgtaaca ctgctggtgc tggtaagga  
1381 ctttcttgg gagttctgaa tcttcaatt gttataccac agatggtggt gtcagtagta  
1441 agcggacat gggatgcatt atttggaggg ggtaatctac cagctttgt ggtgggaggg  
1501 gttgctccg cggccagtgg aatattgca ttcaccttac tccatctcc gcagcctgat  
1561 gcccctceg ccaagactc aagggetgc acagctgct tccattga

**Antibody name:** WR-3

**Protein name:** hydroxymethylglutaryl coenzyme A reductase

**Plant species:** *Hevea brasiliensis*

**NCBI Accession No.:** gi |16417954

**Antibody tag sequence:** CEDRSPTTPKASDA

**Protein sequence:**

1 mdttrlhhr khatpvedrs pttpkasdal plplyltnav ffflffsvay yllhrwrcki  
61 rnstplhivt lseivaiysl iasfiyllgf fgidfvqsfi arashdvwdl edtdpnylid  
121 edhrlvtcpp anistktii aaptklptse pliaplvssee demivnsvvd gkipsysles  
181 klgdckraaa irrealqrmt rrsleglpve gfdyesilgq ccempvgyvq ipvgiagpll  
241 lngreysvpm attegclvas tnrgckaiyl sggatsvllk dgmtrapvvr fasatraael  
301 kffledpndf dtlavvfns srfarlqgik csiagknlyi rfscstgdam gmmmvskgvq  
361 nvleflqsdf sdmdivigisg nfcSDKKpaa vnwiegrgks vvceaiikee vkkvktkv  
421 aslvelnmlk nlagsavaga lggfnahagn ivsaifiatg qdpaqnvess hcitmmeavn  
481 dgkdldhisvt mpsievgtvg ggtqlasqsa clnllgvkga nkespgnsnr llaaivagsv  
541 lagelslmsa iaagqlvksh mkynrSSKdm skaas

**Gene sequence:**

1 atggacacca cgggccgget ccaccaccga aagcatgcta caccggtga ggaccgttct  
61 ccgaccactc cgaaagcgtc ggacgcgctt cgcttcccc tctacctgac caacgcggtt  
121 ttcttcacgc tgtttcttc ggtggcgtat tacctccttc accggtggcg cgacaagatc  
181 cgcaactcca cteccctca tategttact ctctctgaaa ttgttgctat tgttccctc  
241 attgcctctt tcattacct cctaggatc ttcggtatcg atttgtgca gtcattcatt  
301 gcacgcgct ccatgacgt gtgggacctc gaagatacgg atcccaacta cctcatgat  
361 gaagatacacc gtctcttac ttgcctccc gctaataat ctactaagac taccattatt  
421 gccgcacct ccaaattgcc tacctcggaa cccttaattg caccctagt ctcggaggaa  
481 gacgaaatga tcgcaactc cgtcgtggat gggaagatac cctcctatc tctggagtcg  
541 aagctcgggg actgcaaacg agcggctcgc atcgacgcg aggccttgca gaggatgaca  
601 aggaggtcgc tggaggctt gccagtagaa ggggtcgatt acgagtcgat ttaggacaa  
661 tgctgtgaaa tgccagtggg atacgtcag attccggtgg ggattcgggg gccgttgtg  
721 ctgaacggcc gggagtactc tgtccaatg gcgaccacgg agggttggtt ggtggcgagc  
781 actaatagag ggtgtaaggc cattacttg tcaggtgggg ccaccagcgt tttgtgaag  
841 gatggcatga caagagcgc ttgtttaga ttcgcctcgg cgactagagc cgcggagttg  
901 aagtctctt tggaggatcc tgacaattt gataccttg ccgtagttt taacaagtct  
961 agtagattg cgaggctcca aggcattaaa tgctcaattg ctgtaagaa tctttatata  
1021 agattcagct gcagcactgg cgatgcaatg gggatgaaca tggttctaa aggggttcaa  
1081 aacgttctg aattcttca aagtgtttt tctgatatgg atgtcattgg catctcagga  
1141 aatttttgt cggataagaa gcctgctgct gtaaattgga ttgaaggacg tggcaaatca

1201 gttgttttg aggcaattat caaggaagag gtggtgaaga aggtgtttaa aaccaatgtg  
1261 gcctccctag tggagcttaa catgctcaag aatcttgctg gttctgctgt tgctggtgct  
1321 ttgggtggat ttaatgccca tgcaggcaac atcgtatctg caatctttat tgccactggc  
1381 caggatccag cacagaatgt tgagagttct cattgcatta ccatgatgga agctgtcaat  
1441 gatggaaagg atctccatat ctctgtgacc atgcctcca ttgaggtggg tacagtggga  
1501 ggtggaactc aactgcatc tcagtctgct tgtctcaatt tgcttggggg gaagggtgca  
1561 aacaaagagt cgccaggatc aaactcaagg ctcttgctg ccatcgtagc tgggtcagtt  
1621 ttggctggtg agctctcctt gatgtctgcc attgcagctg ggcagcttgt caagagtcac  
1681 atgaagtaca acagatccag caaagatatg tctaaagctg catcttag



**Antibody name:** WR-4

**Protein name:** hydroxymethylglutaryl coenzyme A synthase

**Plant species:** *Hevea brasiliensis*

**NCBI Accession No.:** gi |16417956

**Antibody tag sequence:** YKHFCAKYEKFEKG

**Protein sequence:**

1 maknvgilav diyfpptfvq qealeahdga skgkytiglg qdcmafctev edvismslta  
61 vtslldkyni dpkqigrlev gsetvidksk siktflmqif ekfgntdieg vdstnacygg  
121 taalncvnmw vessswdgry glvctdsav yaegparptg gaaaiailvg pdapiafesk  
181 frgshms Shay dfykpnase ypvvdgklsq tcylmaldsc ykhfcakye k fegkqfsisd  
241 aeyfvfhspy nklvqksfar lvfnfvrna ssidetakek lapfsnlsgd esyqnrdek  
301 vsqqvakply dakvkpttli pkqvgnmyta slyaafasll hskhtelagk rvtlfsygg  
361 ltatmfsrlr hegqhpfsls niasvmnvag klkarhelpp ekfvdimklm ehrygakdfv  
421 tskdcslas gtyyltevds lyrrfyaqka vgentvengll angh

**Gene sequence:**

1 atggcaaaga atgtgggaat tctcgtctg gacatctact ttctcctac cttgttcag  
61 caggaagcac tggaggctca tgatggtgca agcaaaggga aataccatc tggacttgg  
121 caggattgca tggcatttg tactgaggtg gaagatgca tctcaatgag ttgactgca  
181 gttacttca tctcgaca gataatatt gatcctaac aaatcggtcg tctggaagt  
241 ggcagtgaga ctgtgatcga caagagcaa tctattaa cttcttgat gcaattt  
301 gagaaatcg gaaactga cattgaaggc gttgactca caaatgcatg ttatggggg  
361 actgcagctt tattcaactg tgtcaattg gttgagagca gttcatggga tggacgct  
421 ggacttgtag tgtgtactga cagtgcggtc tatgcagagg gtccagccc accaactgga  
481 ggagctgcag ccattgcg ttagtaggt ccagatgac ctattgctt tgaagcaaa  
541 ttaggggga gccatgctc tcatgctt gattttaca agcccaacct ggctagtga  
601 tatccagttg tggatggcaa gcttccca acatgctacc tcatggctct tgattctg  
661 tacaacatt tctgtgcaa gtatgagaaa tttgaaggca agcaattctc tattctg  
721 gctgaatatt ttgtattca ttctctac aacaagctg tacagaaaag cttgctcgt  
781 ttggtgtca atgacttgt gaggaatgcc aggtctattg atgagactgc taaagaaa  
841 ctggcaccgt ttcaaatt atctggtgat gaaagctacc aaaaccggga tcttgaag  
901 gtatcccaac aagttgcaa gcccttat gatgcgaaag tgaaccaac cacttgata  
961 ccaaagcaag tggcaatat gtactgca tcttgtatg cagcattgc atccctct  
1021 cacagtaaac atactgaatt ggcaggcaag cgggtgacac tgttctta tgggagtgg  
1081 ttgacagcca caatgtctc attgcgacta catgaaggcc aacatccct tagcttgca  
1141 aacattgcat ctgtgatgaa tgttcagga aagttgaagg caagacatga gcttcccc  
1201 gagaagttg taaacatcat gaagtaatg gagcaccggt acggagctaa agactttg  
1261 agaagcaagg attgcagcct cttgctct ggaacatact atctcacaga agttgacag

1321 ttgtatcgaa gattctatgc ccagaaggct gttggcaaca cagttgagaa tggtttgctg  
1381 gctaatgggc attga

**Antibody name:** WR-5

**Protein name:** phosphomevalonate kinase

**Plant species:** *Hevea brasiliensis*

**NCBI Accession No.:** gi |16417948

**Antibody tag sequence:** DEIKPDSWAWAWTDC

**Protein sequence:**

1 mavvasapgk vlmtggylll erpnagivls tnarfyaivk piydeikpds wawawtdvkl  
61 tspqlaresl yklslnlal qcvssasm pfveqavqfa vaaahatldk dkknvlnkll  
121 lqglditilg tndfysyrne ieacglpltp eslaalpsfs sitfnveean gqnckpevak  
181 tglgssaamt tavvaallhh lglvdlsssc kekkfsdldl vhiaqtahc iaqgkvsgsf  
241 dvssavygsh ryvrfspevl ssaqdagkqi plqevisnil kgkwdhertm fslplmsll  
301 lgepgtggss tpsmvgalkk wqksdtqksq etwrklsean saletqfnil sklaeehwda  
361 ykcevidscst knsekwieqa tepsreavvk allgsrnaml qirnymrqmg eaagvpiepe  
421 sqtrlldttm nmdgvllagv pgaggfdavf avtlgdsgtn vakawsslnv lallvredpn  
481 gvllsgdpr tkeittavfa vhi

**Gene sequence:**

1 atggctgtag ttgcttctgc tccgggtaag gtgtgatga ctgggggta cctcatattg  
61 gaaagacca atgcagggat tgtactcagc acaaatgctc gattctatgc cattgtgaag  
121 cctatttacg atgaaatcaa acctgatagt tgggcatggg catggactga tgtgaaatta  
181 acatctccc aactagcaag ggaaagcttg tacaaattgt cactgaaaaa tttagctctt  
241 cagtgtgtct ctcaagtgc atcaaggaac ccatttggg aacaagcagt gcaatttgc  
301 gtacagctg cacatgcaac actgacaaa gataagaaga atgtcttaa caagctactc  
361 ttgcaagtc ttgatattac aatattaggt accaatgact tctattcata ccgaaatgag  
421 attgaagcat gtggactccc ttgacacca gaatcattgg ctgcacttcc ttcttttcc  
481 tcaatcacct tcaatgtaga ggaagcaaat ggacaaaact gcaagcctga ggtagctaaa  
541 actggattgg gtcatcagc agcaatgacc actgctgtag ttgctgcttt acttcatcac  
601 cttggattgg ttgatcttc atcctctgt aaagagaaga aattttctga tcttgattg  
661 gtacataaa tagcccaaac tgcccattgt atgcacaag ggaaagtcgg cagtggatt  
721 gatgttagtt ctgcagtta tggcagtcac cgatagctgc gcttctcc agaagtgctt  
781 tcctctgctc aggatgctgg gaaaggaatt ccattacagg aagtcatttc taacatccta  
841 aaaggaaaat gggaccatga gaggactatg tttccttgc caccattgat gagcctgcta  
901 ctagtgagc caggaactgg aggatctcc acgcatcaa tggtaggtgc tctaaagaaa  
961 tggcagaagt ctgatactca gaaatccaa gaaacatgga gaaagtgtc agaggcaaat  
1021 tcagcattg aaacgaatt caatattta agcaagctc agaagaaca tgggacgag  
1081 tataaatgtg tgatagacag ttgcagcaca aaaaactcag agaagtggat tgagcaggca  
1141 actgaacca gccgagaagc agttgttaa gcattattag gatcaagaaa tgccatgctt  
1201 cagatcagaa attacatgag ccagatgggt gaggctgcag gtgtccgat agagcctgaa

1261 tcacagactc gacttttggga tactactatg aatatggatg gagtcttggt ggctggagtt  
1321 cctggagcag gtgggtttga tgcagtcttc gctgtacct taggggactc tggaccaat  
1381 gtggcaaaag ctggagttc actcaatggt ctggccctgt tggftagaga agacccta  
1441 ggtgttttgt tagaaagcgg cgatccaaga accaaggaaa tcacaacagc tgttttgc  
1501 gttcatatt ga

**Antibody name:** WR-6

**Protein name:** mevalonate kinase, MEVK

**Plant species:** *Hevea brasiliensis*

**NCBI Accession No.:** gi |16417946

**Antibody tag sequence:** DVSITEKEEKLEEC

**Protein sequence:**

1 mevkarapgk iilsgehavv hgstavaasi nlytyvtlsf ataenddslk lqlkdlalef  
61 swpigrira lsnlgapsss trtscsmesi ktisalveee nipeakialt sgvsafwly  
121 tsiqgfkpat vvvtsdlplg sglgssaafc valsaallaf sdsvnvdtkh lgwsifgesd  
181 lellnkware gekiihgkps gidntvsayg nmikfksgnl triksnmpk mlvtntrvgr  
241 ntkalvagvs ertlrhnam sfvfnavdsi snelaniiqs papddvsite keekleelme  
301 mnqgllqcmg vshasietvl rttlkyklas kltgaggggc vtlpltls gtvvdkaiae  
361 lescgfqli agiggngevef cfggss

**Gene sequence:**

1 atggaagtta aagcaagagc tccagggaaa atcattctct ccggtgaaca cgcagtggtg  
61 cacggatcca ctgcagtcgc tgcattcatt aatctctaca cctatgacac cctttcttt  
121 gctactcgtg agaatgatga ttcactgaaa ctcagctca aggatctggc actagaattt  
181 tcatggccaa ttggtagaat cagagaggca ttatctaact taggtgctcc ttctcttca  
241 acacgcacct cttgctcgtg ggaatcaatt aagacaattt cagctttggt tgaagaagaa  
301 aataatccag aggcacaaaat tgcactcact tctggagtgt cagccttttt atggttatat  
361 actctatc aaggattaa gctgcccacc gtagttgtca cttctgatct tccactgggt  
421 tcaggcctag gatcatctgc tgcattttgt gttgccctct cagctgctct gcttcttcc  
481 tcagactctg taaatgtgga cacaaagcac ctagggtggt caatatttgg agagtctgac  
541 cttgaattat taaacaaatg ggctctcgaa ggtgaaaaga taattcatgg aaagccatct  
601 ggaatagaca aactgtcag cgcattatgg aacatgatca agttcaagtc tggtaatctg  
661 actcgcatac agtccaacat gccgctcaaa atgctcgtca ctaacacaag agtggggagg  
721 aacacaaaag cactggttgc tgggtttca gagagaacct tacggcacc taatgccatg  
781 agttttgttt ttaatgccgt tgattctatc agtaatgagc tggtaacat catccagtca  
841 cctgctccag atgatgtgc cataactgag aaggaagaga agctagaaga gttaatggaa  
901 atgaatcaag gcttcttca atgcatgggg gtcagccatg cttctataga aactgttctt  
961 cggacaactt tgaatacaaa gttagcttcc aagctgactg gagcaggggg tgggggggtg  
1021 gtgctgacac tgttaccac cctgctatca ggaacagttg ttgacaaagc aattgctgaa  
1081 ttggagtcat gcggatttca atgtttgatt gctggaatcg gtgggaatgg tgttgagttt  
1141 tgctttggtg gttcatcctg a

**Antibody name:** WR-7

**Protein name:** farnesyl diphosphate synthase, FADS

**Plant species:** *Hevea brasiliensis*

**NCBI Accession No.:** gi |22676905

**Antibody tag sequence:** IPRILKKHFRGKAYC

**Protein sequence:**

1 madlkstflk vysvlkqell edpafewtpd srqwvermld ynvpggklnr glsvidsykl  
61 lkegqeltee eiflasalgw ciewlqayfl vlldimdssh trgqpcwfr vpkvglian  
121 dgillrnhip rilkkhfrgk ayyvdlldlf nevefqtasg qmidlittle gekdlskyl  
181 slhrrivqyk tayysfylv acalliagen ldnhivvkdilvqmgiyfqv qddyldcfdg  
241 petigkigtd iedfkcswlv vkalelcnee qkkvlyehyg kdpasvakv kvlynelklq  
301 gvfteyenes ykklvtsiea hpskpvqavl ksflakiykr qk

**Gene sequence:**

1 atggcggatc tgaagtaac ttcttgaag gtctactctg tctcaagca ggagtcctt  
61 gaggatccgg ctctcgaatg gacaccagat tcccgtcaat ggggtgagcg gatgtggac  
121 tacaatgtgc ctggagggaa gctgaatagg gggcttctg taattgacag ctacaattg  
181 ttgaaagaag gacaggaatt aacagaagaa gagatcttc ttgcaagtgc tcttggttg  
241 tgtattgaat ggctcaagc ctatttctt gtacttgatg acattatgga tagctctcat  
301 acacgacgtg gtcagccttg ctggttagg gtgccaagg ttggtctgat tgcagcaaat  
361 gatgggattt tgcttcgcaa tcacattccc aggattctta aaaagcactt ccgagggaa  
421 gcatactatg tagatctct agattgttt aatgaggtgg agttcaaac agcctcagga  
481 cagatgatag atctaattac aaccttgaa ggagaaaagg atttatcaa atacacttg  
541 tactccacc ggagaattgt tcagtacaaa actgcctact actcattta ccttctgtt  
601 gcttgatcat tgctcatagc ggggtgagaat ctggacaatc atattgtgt aaaagacatt  
661 cttgtcaga tgggaatcta ctccaagta caggatgatt attggattg ctttggat  
721 cccgagacaa ttgtaagat aggaacagat atagaagatt ttaagtgttc atggttggc  
781 gtgaaggctt tagaacttg caatgaagaa caaaagaaag tgttatatga gcactatgg  
841 aaagctgacc cagccagtgt agcaaagggt aagtccttt ataagagct gaagcttcag  
901 ggggtattta cggagtatga gaatgaaagc tataagaaac tagtaacctc tattgaagc  
961 catcctagca agccgggtgca agcagtgttg aagtccttt tggccaaaat ttacaagaga  
1021 cagaataa

**Antibody name:** WR-8

**Protein name:** cis-prenyltransferase, CIST

**Plant species:** *Hevea brasiliensis*

**NCBI Accession No.:** gi |40716449

**Antibody tag sequence:** CDNFRRKPHVQYV

**Protein sequence:**

1 mklytgerps vfrllgkymr kglygiltqg pipthlafil dgnrrfakkh klpeggghka  
61 gflallnvt ycyelgvkya tiyafsidnf rrkphevqyv mnlmlekieg mimeesiina  
121 ydicvrfvgn kllsepvkt aadkimrata nnskevllla vcytstdeiv haveesseln  
181 snevcnnqel eeanatgsqt viqtenmesy sgiklvdek ntyinpypdv lirtsgetrl  
241 snyllwqtn cilyspyalw peiglrhvww svinfqrhys ylekhkeylk

**Gene sequence:**

1 atgaattat acaccggtga gagccaagt gtgtcagac ttttagggaa gtatatgaga  
61 aaagggttat atggcatcct aaccagggc cccatcccta ctcattctgc cttcatattg  
121 gatggaaaca ggaggtttgc taagaagcat aaactgccag aaggaggtgg tcataaggct  
181 ggatttttag ctcttctgaa cgtgctaact tattgctatg agttaggagt gaaatatgcg  
241 actatctatg cctttagcat cgataatctt cgaaggaaac ctcattgagt tcagtacgta  
301 atgaatctaa tgctggagaa gattgaaggg atgatcatgg aagaaagat catcaatgca  
361 tatgatattt gcgtacggtt tgtgggtaac ctgaagcttt taagttagcc agtcaagacc  
421 gcagcagata agattatgag ggctactgcc aacaattcca aatgtgtgct tctccttgc  
481 gtatgctata cttcaactga tgagatcgtg catgctgttg aagaatcctc tgaattgaac  
541 tccaatgaag tttgtaaca tcaagaattg gaggaggcaa atgcaactgg aagcggctact  
601 gtgattcaaa ctgagaacat ggagtcgtat tctggaataa aactttaga ccttgagaaa  
661 aacacctaca taaatcctta tctgatgtt ctgattcgaa cttctgggga gaccctctg  
721 agcaactact tactttggca gactactaat tgcatactgt attctcctta tgcactgtgg  
781 ccagagattg gtcttcgaca cgtggtgtgg tcagtaatta actccaacg tcattattct  
841 tacttgaga aacataagga atacttaaaa taa

**Antibody name:** WR-9

**Protein name:** Rubber elongation factor

**Plant species:** *Hevea brasiliensis*

**NCBI Accession No.:** gi |132270

**Antibody tag sequence:** drslppivkd asiqvvsair

**Protein sequence:**

```
1 maedednqqg qgegklylgf vqdaatyavt tfsnylfak dksqplqpgv diiegpvknv
61 avplynrfsy ipngalkfvd stvvasvtii drslppivkd asiqvvsair aapearsla
101 sslpgqtkil akvfygen
```

**Gene sequence:**

```
1 ttttgatcctt ccatttttgc aaaaggaaat ctctgattat ggctgaagac gaagacaacc
61 aacaagggca gggggagggg ttaaaatatt tgggttttgt gcaagacgcg gcaacttatg
121 ctgtgactac cttctcaaac gtctatcttt ttgccaaaga caaatctggg ccaactgcagc
181 ctgggtgtcga tatcattgag ggtccgggtga agaacgtggc tgtacctctc tataataggt
241 tcagttatat tcccaatgga gctctcaagt ttgtagacag cacggttggt gcatctgtca
301 ctattataga tcgctctctt ccccaattg tcaaggacgc atctatccaa gttgtttcag
361 caattcgagc tgccccagaa gctgctcggt ctctggcttc ttctttgctt gggcagacca
421 agatacttgc taaggtgttt tatggagaga attgagcccc aatttgcacc aattgcttcc
481 aactaagcaa gttaatgata tgctcaagaa tatatatcta ttgtgagctt tttttatggt
541 ctcatcctga gtggtgagac tatgttttcg tttgaatatt atactgtggt ttattatgtg
601 ttttgaatat tcataatgag aataaagggc caattgaatt attggccaat atgtaatgat
661 acataaattt cgtgattgag t
```



**Antibody name:** WR-10

**Protein name:** Small rubber particle protein

**Plant species:** *Hevea brasiliensis*

**NCBI Accession No.:** gi |14423933

**Antibody tag sequence:** gvvppvik qvsaqtysv

**Protein sequence:**

1 maeveeerl kyldfvraag vyavdsfstl ylyakdisgp lkpgvdtien vvkvtvtpvy  
61 yipleavkfv dktvdvsvts ldgvvppvik qvsaqtysva qdaprivldv assvfntgvq  
121 egakalyanl epkaeqyavi twralnklpl vpqvanvvvp tavyfsekyn dvvrgtteqg  
181 yrvssylpll ptekitkvgf deas

**Gene sequence:**

1 ataatacagt gatagcttcc acagtgtttt ccgaaaggca aatctttttt caaactcag  
61 cgactgcgtt tgaattgtt gatttttaa gaaattttc aattatggt gaagaggtgg  
121 aggaagagag gctaaagtat ttgattttt tgcgagcggc tggagtatt gctgtagatt  
181 cttctcaac tcctacctt tatccaagg acatatctgg tccataaaa cctggtgtcg  
241 atactattga gaatgtggtg aagaccgtgg ttactcctgt ttattatatt ccccttgagg  
301 ctgtcaagtt ttagacaaa acggtggatg tatcggtcac tagcctagat ggcgtgttc  
361 ccccagttat caagcagtg tctgccaaa ctactcggg agctcaagat gctccaagaa  
421 ttgttctga tgtgcttct tcagtttca aactggtgt gcaggaagc gcaaaagctc  
481 tgtacgctaa tctgaacca aaagctgagc aatatcggg cattacctgg cgtgccctca  
541 ataagctgcc actagtctc caagtgcaa atgtagtgt gccaacctg gttttttt  
601 ctgaaaagta caacgatgt gttcgtgca ctactgagca gggatataga gtgtcctt  
661 attgccttt gttgccact gagaaaatta ctaaggtgt tggagatgag gcatcataat  
721 ctgcactgga ttggttatt tatctattg gagcttttt atatgtactt attcagtgt  
781 tagaataagt cttggtggt gtgttttga tgtggaataa agggccaatt gcattgttg  
841 tcaatatata attatgata acattcgtg attgagtg gaactaaag gttttacaaa  
901 aaaaaaaaa aaaaaaaaa aa

**Antibody name:** WR-11

**Protein name:** hydroxynitrile lyase

**Plant species:** *Hevea brasiliensis*

**NCBI Accession No.:** gi |1223884

**Antibody tag sequence:** CIENYKPKDKVYKVE

**Protein sequence:**

1 mafahfvlih tichgawiwh klkpallealg hkvtaldlaa sgvdprqiee igsfdeysep  
61 lltflealpp gekvilvges cgglniaiaa dkycekiaaa vfhnsvlpdt ehcpsyvvdk  
121 lmevfpdwkd ttyftytkdg keitgklgf tllrenlytl cgpeeyelak mltrkgslfq  
181 nilakrpfft kegygsikki yvwtqdEIF lpefqlwqIE nykpdkvykv eggdhklqlt  
241 ktkeiaeilq evadtyn

**Gene sequence:**

1 atggcattcg ctcatTTTgt tcttattcat accatatgcc acggtgcatg gatttggcac  
61 aagctcaaac cctccttga ggcacttggc cacaaggta ctgcactgga ccttgcagca  
121 agcggcgctg acccaaggca aattgaggag attggctcat ttgatgagta ttctgaacc  
181 ttgttgacgt tcttgaggc actccctcca ggggaaaagg tgattctggt tggcgagagc  
241 tgtggaggac tcaatatagc aattgctgct gataaatact gtgaaaagat tgcagctgct  
301 gttttccaca attcagtatt gccagacacc gagcactgcc catcttacgt cgtggataag  
361 ctcatggagg tgtttccga ctggaaagac accacgtatt ttacgtacac taaagatggc  
421 aaggagataa ctggattgaa actgggcttc acgcttctga gggaaaattt atataccctt  
481 tgcggctctg aggaatatga actggcgaag atgttgacaa ggaagggatc attattcaa  
541 aatattttag ctaagcgacc attcttact aaggaaggtt acggatcgat taagaaaatt  
601 tatgtgtgga ccgaccaaga cgaaatattt ttacctgaat tcaactctg gcaaatagaa  
661 aactataaac cagacaaggt ttataagtc gaaggtggag atcataaatt gcagcttaca  
721 aagactaagg agatcgctga aattctcaa gagtggtctg atacctataa ttga

**Antibody name:** WR-12

**Protein name:** superoxide dismutase (manganese)

**Plant species:** *Hevea brasiliensis*

**NCBI Accession No.:** gi |348137

**Antibody tag sequence:** CQLHHQKHHQTYIT

**Protein sequence:**

1 malrslvtrk nlpsafkaat glgqlrglqt fslpdlpydy galepaisge imqlhhqkhh  
61 qtyitnynka leqlndaiek gdsaavvklq saikfngggh vnhsifwknl apvregggel  
121 phgslgwaid adfgslekli qlmnaegaal qgsgwvwlal dkelkklvve ttanqdpvt  
181 kgptlvpllg idvwehayyl qyknvrpdyI kniwwmwnk yasevyakec pss

**Gene sequence:**

1 atggctctgc gatctctagt gaccgaaag aacctacct cagccttcaa ggccgccaca  
61 gggctagggc aactgcgggg attgcagacc ttctctctcc ccgatctccc ttacgactat  
121 ggtgccctgg agccccgat tagcggcgag ataatgcagc tgcacacca gaaacatcac  
181 cagactata ttactaacta caacaaggct ctcgagcaac tcaacgacgc tatagagaag  
241 ggcgattctg ctgccgtcgt caagttgcag agcgccatca agttcaacgg tggaggtcat  
301 gtcaaccact ccattttctg gaagaatctt gccccgtcc gtgaaggagg tggatgaact  
361 ccgcatggtt cccttggttg ggctattgac gcagatttg gctcattgga aaagtgata  
421 caattaatga atgcagaagg tgctgcgctg caaggatctg gatgggtgtg gcttgccttg  
481 gacaaagaat tgaagaagct tgtggttgag accactgcaa accaggatcc attgtaact  
541 aaaggaccaa ctttagttcc ttgcttggg attgatggtt gggagcatgc atactactta  
601 cagtacaaa atgtcagacc agactatcta aagaacatag gaaagtaag gaattggaag  
661 tatgcaagtg aagtgtatgc caagaatgc cttcttctt ag

**Antibody name:** WR-13

**Protein name:** rubber peroxidase 1

**Plant species:** *Hevea brasiliensis*

**NCBI Accession No.:** gi |109809965

**Antibody tag sequence:** NFNNTNSPDPTLNC

**Protein sequence:**

```
1 mhisplmlva ialyailvgs srplayaqls ptfydqscpn vsniirgviq eslqdsrig
61 aslirlhfhd cfvngcdasi lldntdies ekqaaannns argfdvvdtn karlesacpg
121 ivscadiltv saqqsvdlag gptwnllgr rdsltasrsq anlsipgpfe tldqlkskft
181 avglnntdl valsgahtfg raqctfspr lynfnntnsp dptlnntylq tlqqicpqgg
241 ngsvitnldl ttsdtfdney fsnllvgegl lqsdqelfnt tgadtvaivq nfsanqtaff
301 esfvesmlrm gnlsvlgti geirlncskv ngssagaet llvssm
```

**Gene sequence:**

```
1 atgcatactc ctcattgat gttggtggcg atagctttat atgcaattht agttggatca
61 tcaagacccc tggcctacgc tcagctatct ccaacattht atgatcaaag ctgcccacaa
121 gtctccaaca ttattcgtgg agtcatccaa gaatccttgc aatctgattc caggattggt
181 gccagectca tcaggcttca ttccatgac tgctttgtca atggttgcca tgcatacaat
241 ttgttgaca atactgatac tatagagagt gagaacaag ctgctgcaaa taacaactca
301 gctagaggtt ttgatgtgtg tgatacaatg aaggctagat tggagagtgc ttgctctggc
361 attgtttctt gtgctgatat tctaactgtt tcagctcaac aatctgttga ttggcagga
421 gggccaacat ggacaaatct acttgggaaga agagatagct taacagcaag cagaagtcaa
481 gctaacttta gcattccagg tcctttcgag acccttgacc agctcaagtc caagttcacc
541 gccgtaggcc tcaacaacaa taccgatcta gttgccctat ctggtgctca cacgtttgga
601 agagetcaat gcagaacatt tagccccctg ttgtacaact tcaataaac taattctcca
661 gaccaacat tgaacacaac atatctgcaa acgcttcaac aaatatgtcc acaaggagga
721 aatgggagtg taataactaa tcttgatctc acaactctg ataccttga taatgaatat
781 ttctcaate ttctagttgg agaaggcctt ctccagagtg atcaagaact atttaact
841 actggggctg atactgttgc tattgtcaa aatthtagtg ctaatcagac tgctttttt
901 gaaagctttg tggagctcat gctcagaatg ggaatctca gcgttttaac aggaactatt
961 ggagagatta gattgaattg cagcaaagt aatggaatt catcagctgg agcagaaact
1021 ctcttgta gctccatgta g
```

**Antibody name:** WR-14

**Protein name:** calcium-dependent protein kinase 1, CDPK

**Plant species:** *Hevea brasiliensis*

**NCBI Accession No.:** gi |289413843

**Antibody tag sequence:** CRQNQQQSYQQPE

**Protein sequence:**

1 mgccsskekp skseankgyr ssgtgnlrqn qqqqsyyqqp eyqqqqavqh pkmtvpqtqt  
61 qtpqtrpqqp qastpppvra aptnlarsv qtpqtilgkp ledikqyysl gkelgrgqfg  
121 vtylctenst ghyacksil krklinkgdr edikrevqim qhlsqpniv efrgsyedrq  
181 svhvmelca ggelfdriia kghyserdaa rickdivnvv hachfmgvmh rdlkpenfll  
241 askdegamlk ttdfglsvfi eegktyrniv gsayyvapev lrrsygkeid iwsagvilyi  
301 llsgvppfwa etekgifdai legyidfess pwpsidsak dlvrmltqd pkrritsaqv  
361 ldhpwikdgg aasdkpidsa vlsmkqfra mnklklalk viaenseee ikglkamftn  
421 mtdtksgtit yeelktglar lgsrlsetev kqlmeaadvd gngaidyief isatmhryrl  
481 erdehlykaf qyfdkdssgy itrdelesam meygmgeas ikeiisevdt dndgkinyee  
541 fctmmrrgvq qpgklf

**Gene sequence:**

1 atgggttgtt gtagcagcaa ggagaagcct taaaatcag aggctaataa agggtacagg  
61 tcaggaggca ctgtaattt aaggcagaac caacaacaac aatcttatta tcaacaacca  
121 gaataccagc aacaacaggc cgtgcagcac caaaaaatga cgcctcctca aactcaaaac  
181 caaaccegc aaacaaggcc ccaacaacct caggcatcaa cccccctcc agtaagagca  
241 gcacctaga acctacagc aagatcagtt caaacgccac agaccattct gggcaaacc  
301 ttggaagaca ttaagcagta ctacagtcta gggaaagaac tggtagaggg ccaatttgg  
361 gttacttatt tgtgcacaga gaattccact ggccacattt atgcctgcaa atccatactg  
421 aagagaaaac taatcaataa ggggtgacaga gaagatatca agagagaggt tcagattatg  
481 cagcacttgt ctgggcagcc aaatattgta gagtttaggg gttcctatga ggataggcaa  
541 tetgttcag ttgtgatgga gctttgtgct ggaggggaac ttttgatcg tattattgct  
601 aaagggcatt atcggagag agatgccgct aggatttga aggatattgt gaatgtggtg  
661 cacgcttccc atttatggg agtgatgcac cgtgatctca agccggagaa tttctgctg  
721 gctagcaagg atgaggagc aatgttgaag accactgatt ttggactgct tegtctcatt  
781 gaggaaggga aaacataccg taatatagtt ggtagtgcct attatgttgc tctgaagta  
841 ttgagcgta gttatggaaa gaaatagat atttggagtg caggagttat tttgtatatt  
901 ctactcagtg gtgtactcc atttgggct gaaactgaaa aaggaatatt tgatgctatt  
961 ctagaaggat acattgattt taaaagtca ccatggccat caatatctga cagtccaaa  
1021 gatctggtca ggagaatgct gactcaggac caaaaaggc gaattacttc agcacaagtt  
1081 cttgaccatc catggattaa agatggaggt gcagcatcag acaagccaat agatagtgca  
1141 gttctcteta gaatgaagca atcagggca atgaataagc tcaagaagct agcattaaag

1201 gttattgctg aaaatctctc tgaagaagaa attaaaggtc ttaaagcaat gttcacaac  
1261 atggacactg acaagagtgg cacaatcacc tatgaagagc tgaagacagg ttagctcga  
1321 cttgggtcaa ggctctctga aactgaagtt aaacaattaa tgaagctgc cgatgtggat  
1381 ggaaatggag caatcgacta cattgagttt atctctgcta caatgcatag atatcgactg  
1441 gaaagagatg agcatctata caaagcattt cagtactttg ataaggatag cagtgggtat  
1501 ataacaagag atgaattaga gtctgcatg atggagtatg gtatgggaga tgaggccagt  
1561 attaaggaaa taatttctga ggtggataca gataatgatg ggaaaatcaa ctatgaagaa  
1621 ttctgcacta tgatgagacg tggagtacaa caaccaggaa agcttttcta g

**Antibody name:** WR-15

**Protein name:** ethylene-inducible protein, ETHI

**Plant species:** *Hevea brasiliensis*

**NCBI Accession No.:** gi |1209317

**Antibody tag sequence:** GLGEAMVGINLNDKC

**Protein sequence:**

1 magtgvvavy gngaitetkk spfsvkvgl qmlrggvimd vvnpeqaria eeagacavma  
61 lervpadira qggvarmsdp qlikeikqsv tipvmakari ghfveaqile aigidyvdes  
121 evltpadeen hinkhnfrif fvcgcrnlge alrriregaa mirtkgeagt gnvieavrhv  
181 rsvmgdirll nmdddevft fakkiaapyd lvmqtkqlgr lpvvqfaagg vatpadaalm  
241 mqlgcdgvfv gsgvfksgdp arraraivqa vthysdpdml aevscglgea mvginlndkk  
301 verfanrse

**Gene sequence:**

1 atggctggaa ctggggtggt ggcagttac ggcaacggag caatcaccga aacaaaaaag  
61 tccccctttt ccgtgaaggt gggctagcc cagatgctaa gaggcgggtg tcatatggac  
121 gtcgtaaate ccgagcaggc ccgcatagcc gaggaggctg gcgcttgctc tgcatggct  
181 ttggagcgtg tgccagccga tatccgcgct caagtggeg tcgcgcgat gagcgaccct  
241 cagcttatca aagaaattaa acagtccgtt accatccccg tcatggccaa ggcccgcac  
301 ggccacttcg tggaggccca aattcttgaa gccataggca tcgattacgt cgacgagagc  
361 gaagtgccta cccctgccga cgaagagaac cacatcaaca aacataattt ccgtatcccc  
421 ttcgtttgcg gttgtaggaa ctaggcgag gcgcttcgaa ggatacgcga aggagccgcc  
481 atgattagga ccaaaggtga agcaggaaca gggaaatgta tcgaagcggg taggcacgtg  
541 aggtctgtga tgggtgatat taggctttg aggaatatgg acgacgatga ggtgttcact  
601 ttcgccaaga agattgctgc gccgtacgat ttggttatgc agacgaagca gctagggagg  
661 ctacctgtgg tgcagttcgc ggcgggaggg gtcgcgacgc cggcggatgc ggctttgatg  
721 atgcagttgg gttgcgatgg ggtgtttgtg gggctctggg tgttcaagag cggggacccc  
781 gcaaggaggg ccagagcaat tgtcaggcg gtgacgatt atagcgtacc cgacatgctc  
841 gcggaggtga gttgcgttct cgggtaggct atggtgggta tcaatttaa cgacaagaag  
901 gtggaaaggt tcgcaaacag gtcggaatag

**Antibody name:** WR-16

**Protein name:** ethylene receptor, ETHR

**Plant species:** *Hevea brasiliensis*

**NCBI Accession No.:** gi |56900932

**Antibody tag sequence:** QQNPVGYTVPIQLPC

**Protein sequence:**

1 meacnciepq wpadellmky qyisdfial ayfsipleli yfvkksavfp yrwvvlvqfga  
61 fivlgeathl inlwftmhs rtvaivmtta kvltavasca talmlvhiip dllsvktrel  
121 ilknkaaeld remglirtqe etgrhvrmlt heirstldrh tilkttlvel gtrlaleeca  
181 lwmptrsgle lqlsytrqq npvgytvp iq lpvinkvfsc nravkispnc pvarirpfag  
241 kympgevvav rvpllhlsnf qindwpelst kryalmvlml psdsarqwha yelevelvevva  
301 dqvavalsha aileesmrar dllmeqval dlarreaeta irarndflav mnhemrtpmh  
361 aiaalssllq etgltpqrl mvetilkssn llatlindvl dlsrledgsl qldlgtfnlr  
421 avfrevlnli kpiasvkkkp vtlnlapdlp eyaigdekrl mqtilnvvgv avkfskegni  
481 sitafvarpe slrdlrpdf fpvpsddhfy lrvqvkdegl ginlqdkpl ftkfaqnqsl  
541 atrnsggsgl glaickrfvn lmeghiwies eglgkgctai fvvklailec sneskhpfmq  
601 ngpkpnqgak qtsfmgpess llmddtgyyq dgnkrftwgt lxcdxtvss sdeclrvvxl  
661 dhkvvfmdivc mpdglellsa ymkdftrhe rplivalywn ankvtkenem kvgmdgvilk  
721 pvsvdkmrgv lsdllehrvl feam

**Gene sequence:**

1 atggaggcat gcaattgat tgagccacaa tggccagcgg atgaattgt gatgaagtac  
61 caatatatt cagatttct cattgctctt gcttattct ccattcctct agagctcatt  
121 tttttgta agaaatcagc agttttct tatagatggg tgctggtgca gtttggtgct  
181 ttatagttt tatgtggggc aacacatctt attaacttat ggacttttac catgcattca  
241 cgaactgtg cttattgta gaccacagca aaagtttga ctgctgcagt tcatgcgca  
301 accgccctta tgctgtaca cataattct gatctttga gtgttaaac tagagaacta  
361 atttgaaaa acaaggctgc agagcttgat agagagatgg gcctgatccg tacacaggaa  
421 gaaacaggcc ggcattgtag gatgctgact catgagatca ggagcacact tgatagacat  
481 accatactaa agaccacact tttgaaactg ggaaggacat tggcattgga agagtgtgcc  
541 ttatggatgc ccaccagtc tggattagag ctcaacttt cctacactct tcgtcagcag  
601 aatcctggtg gatatactgt gcctatccag ctctctgta ttaataaagt atcagttgt  
661 aaccgtgctg taaaaatc acctaactgt ccagtggcaa gaatacgtcc tttgcagga  
721 aaatatatgc ctggagaggt ggttgctgtt egagtccac ttctcatct ctctaattc  
781 caaattaatg attggcctga gctttctacc aaacgetatg cttgatggt tttgatgct  
841 ccctcagata gtgcaaggca gtggcatgct tatgagttgg agcttgttga agtagttgct  
901 gaccaggtgg ctgtgtct atcacatgct gctatcttag aagagtcaat gagggcaagg  
961 gatctctta tggagcagaa tttgcaact gatcttgcga ggagagaagc agaaacagct



1021 atccgtgctc gcaatgattt cttagctgctc atgaaccatg agatgagaac tcccatgcat  
1081 gcaattattg cactttcttc cttactgcaa gaaactggac tgacgcctga gcagcgctg  
1141 atggttgaga caattcttaa gagtagtaac ctggtggcta cttaataaa tgatgtatta  
1201 gaccttcaa ggcttgaaga tggcagtctt cagcttgacc tgggaacttt taatctacgt  
1261 gctgtattca gggaggtcct taactgac aagcctattg catctgttaa aaagttgcct  
1321 gttactttaa atttagctcc agatttgcca gaatatgcca ttggtgatga gaaacgtctt  
1381 atgcaaacca ttttaaatgt tgttggaat gctgtgaagt tctctaaaga aggcaacac  
1441 tcaataactg cttttgtgc tagaccagaa tcattaagag atcttcggtt tctgtattt  
1501 ttcccagtgc caagtgatga tcactttat ttgcgtgtac aggtaaaaga tgagggacta  
1561 ggtataaacc tccaagatat tctaagtgt ttactaat tgcacaaaa tcaatcattg  
1621 gcaaccagaa attctggtgg cagtggactt ggccttgc aa tttgtaagag gtttgaat  
1681 cttatggaag gacacatctg gatagagagt gaaggacttg gcaagggatg cactgctac  
1741 tttgtgtaa aactgctat tcttgagtgc tcaaatgaat cgaagcatcc ttcatgcag  
1801 aatgggcca agcacaatca aggggcaaaa caaactctt ttatggggcc tgaagtct  
1861 ttgtaatgg atgatacggg gggtaccag gacgtaaca aaaggacttt tggggcact  
1921 ttgnntgtg atngaccac tgtgactcc agcgtgagt gtttacgagt agttntctg  
1981 gaccacaagg tggatttat ggatgtgtgc atgcctgatg gtttgagtt gctatccga  
2041 tacatgaaag attcacaaa acgtcatgaa aggccattaa tagtggcgct ttactggaac  
2101 gcaacaagg tgacaaagga aaactgatg aaggtcggca tggatggtgt aatactgaaa  
2161 cctgtctctg ttgacaagat gaggggtgtt ttatcagatc ttctggagca tcgggttcta  
2221 ttcgaggcca tgtaa

**Antibody name:** WR-17

**Protein name:** glutathione reductase, GLUR

**Plant species:** *Hevea brasiliensis*

**NCBI Accession No.:** gi |186920319

**Antibody tag sequence:** CMKNTISGRQEKTVM

**Protein sequence:**

```
1 avfcipplsv vglseeqaie qakndilvft stfnmknti sgrqektvmk lvvdaetdkv
61 lgasmcgpda peiiqgiava lkcgatkaql dstvgihpst aeefctm
```

**Gene sequence:**

```
1 gcagtgttt gcataccacc tttgtctgta gtaggcctca gtgaagagca ggcaatagag
61 caagcaaaaa atgatatatt ggtttcact tcaacctca atcctatgaa gaatactatc
121 tctggacggc aagagaagac agtgatgaag cttgtgttg atgctgagac agataaagt
181 cttggagctt caatgtgtgg gcctgatgct cctgaaatta tacagggat tgctgttgca
241 ttgaagtgcg gagcaacaaa ggccaattg gacagcacgg tgggaatata cccttctact
301 gctgaggaat tctgtacat g
```

**Antibody name:** WR-23

**Protein name:** latex cyanogenic beta glucosidase, LACG

**Plant species:** *Hevea brasiliensis*

**NCBI Accession No.:** gi |31580730

**Antibody tag sequence:** LDDKLRVRYFKGYLC

**Protein sequence:**

1 mmkekflkeh pyllekevsr sdfppnflfg vatsayqieg gcreggrgps iwdfashtkg  
61 tildgsngdv avdhyhryke dieliaklgf dayrfslsws rifpdglgtk vneegiafyn  
121 niinallekq iepyitlyhw dlphlqesm ggwnkeivk yfaiyadtcf asfgdrvkkw  
181 itlneplqta vngfdtgila pgkhehsyte pflashhqil ahatavsivr smykdnqgqe  
241 vglvvdcewa esnsdkiedk aaaakrlefq lgwylhplyy gdypevmrki lggglpkfse  
301 edkellrnsd dfiglnhyss rfikhvtdsp aecyykaqe ierlakwedg epigeraase  
361 wlyvrpwlgr kvlnyivqry nnpiiyvten gmddedssap lheml**ddklr vryfkgy**laa  
421 vaqaikdgad vrgyfawsll dnfewaqqyt krfglyyvdy knglarhpks saywfmrflk  
481 gdegkngke

**Gene sequence:**

1 atgatgaagg agaaattctt gaaggaacat ccatatttgc tggaaaagga ggtctctcgc  
61 tctgatttcc ctctaattt tctctttggt gttgccactt ctgcctatca gattgaaggt  
121 ggctgcaggg aaggtgtag aggtcctagt atatgggatg cttttcaca caccaaagga  
181 actatcttg atggaagcaa tggatgatg gcagtgatc attatcatg atacaaggaa  
241 gacattgaac tcatcgctaa gttggggtt gatgcttacc gatttcctt atcatggtct  
301 cgcattttcc ctgatggtt ggaacacaaa gtcaatgaag aaggatagc attctataac  
361 aatatcatta atgctcttct tgaagggt atagagccat atataactct gtaccattgg  
421 gatctccct tgcatttca agagtcaat ggagggtg tgaataagga aattgtaaaa  
481 tactttgcaa tctatgcaga cacttctt gcaagtttg gtgatagat taagaaatg  
541 attactctaa atgagcctc ccaaacagca gtaaatggat ttgatactgg aatacttgc  
601 cctggaac atgaacattc atatacagaa ccattttgg cttcacacca ccagatctg  
661 gccatgcaa cagctgttc catataccgc agtatgtaca aagacaatca aggaggagaa  
721 gtaggcttg tggggactg tgaatggct gaatctaatt cagataaaat tgaagataaa  
781 gctgctgct caaacggct tgagttcag cttggatggt atttgcatcc tttatattat  
841 ggagactatc ctgaagtat gcgtaaaata ctgggaggtg ggctcccaaa attctcagag  
901 gaagataagg aattacttag gaactcact gactcattg gtctaaatca ctattctca  
961 agattcatca agcatgtac agatagccct gcagaatgct attactataa agccaagaa  
1021 atgagagac ttgctaatg ggaagatggt gagccaatc gcgagagggc agcatcagaa  
1081 tggctctat tctgctctg gggactcgg aagttctca attacatag cagagatac  
1141 aataatccca taattactg tactgagaat ggtatggatg atgaagactc cagtcccct  
1201 ctccatgaaa tgctagatg caaactgaga gttcgtatt ttaaaggata ccttctgca

1261 gttgctcagg caatcaaaga cggagcagat gtgaggggat atttgcatg gtcattgtg  
1321 gacaatttg aatgggctca aggtatacc aagcgtttg gttgatcta tgtggattac  
1381 aagaatggac ttgctcgcca ccaaagtct tctgcttatt ggatcatgag gttcttga  
1441 ggtgatgaag ggaaaaatgg caaagagtga

**Antibody name:** WR-25

**Protein name:** beta-cyanoalanine synthase, CYAS

**Plant species:** *Hevea brasiliensis*

**NCBI Accession No.:** gi |326909405

**Antibody tag sequence:** CQRIRDLPKNLPGTK

**Protein sequence:**

```
1 matlrnllkk ksltsnelai rrvsseaas espsfaqrir dlpknlpgtk iktevsqlig
61 rtplvylnkm segcgaylav kqemmqtas ikdrpafsmi ndaekknlit pgktvliept
121 sngmgismaf maamkgykmv ltmpsytsle rrvtmkafga elivtdptkg mggtvkkayd
181 llestpnafm lqqfsnpans kihfettgpe iwedtlghvd ifvmgigsgg tvsgvgqylk
241sqnqnvkiyg vepaesnvl n ggkpgphqim gngvgfkpdi lmdvmekvl evssedavkm
301 arrlaleegl mvgissgant vaarlarp enkgklivtv hpsfgeryls svlfeelrye
361 aanmqvpvvd
```

**Gene sequence:**

```
1 atggctactc ttaggaactt gttgaagaaa aaatctttaa cgtccaacga gcttgctata
61 aggaggttcg tctctccga ggctgctgct gaatctcett ctttgctca aagaatcagg
121 gatcgccca agaattccc tggactaaa atcaagactg aagtttctca acttattggg
181 agaactcccc ttgtttatct taacaaaatg agtgaaggat gtggagctta catagccgct
241 aagcaagaga tgatgcaacc aactgccagc atcaaaagaca ggccggcgtt tcaatgatc
301 aatgatgcag aaaagaagaa ttaatcact cccgggaaga cggcttctgat agagccaaca
361 tctggaata tggggattag tatggctttt atggcagcca tgaaaggata caagatggtt
421 ctaacctgc cctcttacac aagctggag agaagggtga ctatgaaggc atttgagct
481 gagctaattg tctctgatcc caccaagggg atgggtggaa cagttaagaa ggcctatgat
541 cttttggaat ccacacaaa tgcttctatg ctacaacaat ttcaaatcc tgcaaatct
601 aagatccatt tgaaacgac aggtcctgaa atttgggagg atacactgg tcatgttgac
661 atctttgtaa tgggaatagg cagtggagga acagtctctg gcgttgggca gtacctaaa
721 tctcaaaatc ctaatgtaa gatatatggg gtggagcctg ctgaaagtaa tgtgctcaac
781 ggtgtaaac caggtcctca tcaaatatg ggtaacggag ttggatttaa accagacata
841 ttgacatgg atgtaatgga aaaggttctt gaggtagca gtgaagatgc agtaaaaatg
901 gctaggagat tggcattgga ggaggggctt atggtgggaa tatcatctgg agccaacaca
961 gttgctgcac ttagacttgc tagaatgcca gagaacaag gaaaactcat cgtgactgtt
1021 catccaagt tcggggagcg atactgtca tctgtcctgt ttgaagaact gagatatgag
1081 gctgcaaca tgcaaccagt tccagttgac taa
```

**Antibody name:** WR-28

**Protein name:** ascorbate peroxidase, ACPX

**Plant species:** *Hevea brasiliensis*

**NCBI Accession No.:** gi |27449248

**Antibody tag sequence:** HPGREDKPEPPPEC

**Protein sequence:**

```
1 mtknypkvse eyqkaidkak rklrgfiaek gcaplmlria whsagtydan tktggpfgtm
61 rhaaeqahaa nngldiavrl lepikqqfpi lsyadfyqla gvvaveitgg peipfhpgr
121 dkpepppegr lpnatkadh lrevfgktmg lsdkdivvls gghtlgrchk ersgfdgpwt
181 anplifdnsf ftellagqke gllqlptdtv lvt dpvfrpy vekyaadedda ffadyaeahv
241 klseigfaea
```

**Gene sequence:**

```
1 atgacgaaga actacccaaa agttagttaa gaggaccaga aggccattga taaggccaag
61 aggaagctca ggggtttcat cgctgagaag ggctgtgctc ctctcatgct ccgtatcga
121 tggcactcag ctggaactta cgacgcgaac accaagactg gaggtccatt tggaaacctg
181 aggcacgcag cggagcaggc ccatgctgct aacaatgggc tggatattgc tgcagactc
241 cttgagccca tcaagcagca gttccctatc ctctctatg ctgacttcta tcagcttct
301 ggtgtgttg ccgttgagat cactgggtgg cctgagatcc cattccacc tggcagagag
361 gacaagctg aaccacctc agaaggtcgt ctgcctaatg ctactaaagg tgctgatcac
421 ttgagggagg tctttggcaa aacctgggt ctcagtaca aggatcctg ttttctctc
481 ggtggccaca cctgggaag gtccacaag gagcgtctg gttttgacgg gcctggact
541 gtaaccac tcattttga caattcttc ttcacggagc tcttgctgg acagaaggaa
601 ggcctctac aattgccaac tgacaccgtt cttgtaccg atcctgtct cgcccatat
661 gttgaaaaat atgctgctga tgaagatca ttcttgctg attatgctga ggccatgtg
721 aagctctccg agctggggtt tgctgaggct taa
```

**Antibody name:** WR-29

**Protein name:** heat-shock protein 70, HSP70

**Plant species:** *Hevea brasiliensis*

**NCBI Accession No.:** gi |186898205

**Antibody tag sequence:** EKYKAEDDEEVKKKC

**Protein sequence:**

1 mapktegai gidlgttysc vgvwqndrve iilandqgnrt tpsyvaftdt erligdaakn  
61 qvamnpqntv fdakrligrr fsdpsvqsdm khwpfkvisg pgdkpmivvq ykgeekqfap  
121 eeissmvltk mkeiaeylg qtvknavitv payfndsqrq atkdagaiag vnmriinep  
181 taaaiaygld kkgstgekn vlifdlgggt fdvslltiee gifevkatag dthlggedfd  
241 nrlvnhfvae fkgkhkkdis tnaralrrlr tarerakrtl sstsqtiee dslyegidfy  
301 atitrarfee lnmdlfrkcm epvekclrds kidksqvhdv vlvggstrip kvqllqdif  
361 ngkelcksin pdeavaygaa vqaailsgeg dekvqdllll dtvplslgie taggvmtvli  
421 prnttiptkk eqifstysdn qpgvliqvyve gerartkdnn llgkfeltgi ppaprgvpqi  
481 nvcfdidang ivnvsaedkt agvknkitit ndkgrlskee iermvqeaek ykaedeevkk  
541 kveaknslen yaynmrntvk ddkfagklap adkgkiekai detiewldrn qlaeveefed  
601 kkleleglcn piiakmyqgg aggdvpvpga empnsnygkt ssggsgagpk ievd

**Gene sequence:**

1 atggcgccaa aaactgaagg caaggccatt ggtatcgatc ttggcaccac ctacagctgc  
61 gtgggtgtgt ggcagaacga cggggtgag atcatagcca atgacaggg caacagaact  
121 actcctctt atgttgcctt cactgacacc gagegtctca ttggggatgc agctaagaac  
181 caagttgcta tgaacctca aaactgtc tttgatgcca aactctcat tggtagcgcg  
241 tttctgatc cttctgtgca gagcgacatg aagcactggc cttcaaggt tattctggt  
301 cctggtgata agcctatgat tgtggtgcaa tacaagggtg aagaaaagca atttgcgct  
361 gaggagattt cttctatggt gctaaccaag atgaaggaga ttgcagaggc ttatctgggt  
421 cagacagtga agaatgccgt gatcacagtg cctgcttatt tcaatgactc gcaaaggcag  
481 gccaccaagg atgctggtgc tattgcaggg gtgaactca tgagaattat caatgagcct  
541 acagctgcag ccattgctta cggtttggac aagaaaggtt cgagtactgg agaaaagaac  
601 gtgttgattt tcgatcttg tggagggaca tttgatgtt ctctctgac gatcgaggag  
661 ggtatatttg aagtgaaggc aacagctgga gacaccacc ttggaggaga ggacttcgat  
721 aataggcttg tcaaccattt cgtgcagag ttcaagggga agcacaagaa ggatattagt  
781 actaatgca gagccttgag aaggttgaga accgcccgcg agagggcaa gaggactctg  
841 tcttcaacct cgcaacaac cattgagatt gattctctct acgaagggat tgattctat  
901 gcgaccatca ctagagcaag atttgaagag ctgaacatgg atttgttag aaagtgcag  
961 gaaccctgag agaatgtct tctgactcc aagatcgata agagtcaagt tcatgacgtt  
1021 gtgctcgttg gtgggtcaac aagaattcct aaagttcagc aactttgca agatatctc  
1081 aacggaaagg agctctgcaa gagcataaac cccgacgagg ctgtcgtta tggagcagct

1141 gtccaagctg caattcttag tgggaaggg gatgagaaag ttcaagattt acttctcttg  
1201 gatgttactc ctctcagcct cggaattgag actgctggg gtgtaatgac agtcttgatt  
1261 ccaaggaaca ccactatcc taccaaaaa gagcaaatct tctctacata ctctgataat  
1321 caaccaggag tgcttattca ggtgtatgaa ggtgaaagag ctagaaccaa ggataataat  
1381 cttcttgaa aattcgagct caccggaatc cctctgcac ccagagcgt tcctcagatt  
1441 aatgtgtgtt tcgacattga cgccaatggt attgtgaatg tctctgctga ggataagact  
1501 gctggagtga agaacaagat aacaatcact aacgataaag gaagattgag caaggaagag  
1561 attgaaagaa tgggcaaga agcagagaag tacaaagcag aggatgagga ggtgaagaag  
1621 aaggtggagg ccaagaactc ttggagaac tacgcataca acatgagaaa tacagtgaag  
1681 gatgacaagt tcgccgaaa attggctcca gccgacaagg ggaagattga aaaggcaatt  
1741 gatgagacta ttgagtgggt ggacagaaac caattagcag aggtggagga gttgaggac  
1801 aagtgaagg agcttgagg cttgtgcaat ccaattattg caaagatgta tcagggcggg  
1861 gctgggggtg acgtaccagt gggggcgc gaaatgccga acagcaacta tggcaagact  
1921 agctccggcg gttctggtgc cgggccaag atcgaagaag ttgattaa



**Antibody name:** WR-30

**Protein name:** aquaporin

**Plant species:** *Hevea brasiliensis*

**NCBI Accession No.:** gi |307826678

**Antibody tag sequence:** CQSQDDKDYTEPPA

**Protein sequence:**

1 megkeedvrl gankyretqp igtsaqsqdd kdyteppaap lfeptelstsw sfyragiaef  
61 iatflflyis vltvmgvvka ptkestvqiq giawsfggmi falvyctagi sgghinpavt  
121 fglflarkls ltralyymvm qclgaicgag vvkgefgrhq ytlgggans vnpgytkgdg  
181 lgaeivgtfv lvytvfsatd akrnardshv pilapligf avflvhlati pitgtginpa  
241 rslgaaiifn kdkgwddhwi fwvvpfigaa laalyhqvvi raipfkk

**Gene sequence:**

1 atggagggca aggaagaaga tgtagattg ggagctaaca aatatagga gacgcagccc  
61 atgtgactg cagctcagag ccaagatgac aaggactaca ctgaaccacc agcagcggc  
121 ctgttcgagc caacggagct cactcttgg tcctttaca gggctggtat tgcagagttc  
181 atagccactt tctgttctt atacatctet gtttgactg tcatgggtgt agttaaggca  
241 cccaccaagt gtcgactgt tgggattcag gggatagctt ggtccttgg tggcatgatc  
301 ttgctcttg tctattgtac tgctggcatt tcaggaggtc acataaacc ggcggtgacg  
361 tttgggctgt tttggcaag gaaactgtcc ttgacaagg cttgtacta catggtgatg  
421 cagtgccttg gagccatag tggctgctgt gtagtgaaag gattgaagg gcgtcaccag  
481 tatactttgt tgggtggtgg tgccaatagt gtgaaccag gttacacaa aggtgatggg  
541 cttggtgctg aaattgttg cacctttgtt cttgtctaca ctgtctctc tgctactgat  
601 gccaaacgta atgccagaga ctccatgtt cctatttgg cacctttgcc aattgggttc  
661 gctgtgttct tggcgactt ggtaccatc ccaattacag gaactggtat caaccagct  
721 cgtagcttg gtgcagcaat catctcaac aaggacaagg gctgggatga tcaactggatt  
781 ttctgggtgg gtccattcat tggagcagca cttgcagctc tataccacca agttgtgatc  
841 agagccatcc cttcaagaa gtga

**Antibody name:** WR-31

**Protein name:** Geranylgeranyl diphosphate synthase, GGDS

**Plant species:** *Hevea brasiliensis*

**NCBI Accession No.:** gi |14325238

**Antibody tag sequence:** QEQLAGFDPEKAAPC

**Protein sequence:**

1 mssvnlgsww htsyvlnqat rsrskskfs lpfnpkls la isfayrkser pissvsait  
61 keeetlqeeq npppsfdk symlqkgnsi nqaleaipl qepakihesm rysllaggkr  
121 vrpalclaac elvggndsm mpaacavemi htmslihddl pcmdnddlrr gkptnhivfg  
181 edvavlagda llafafehia vstlnvssar ivravgelak aigaeglvag qvvdinsegs  
241 sevdleklef ihihktakll egavvlgail gggtdееevеk lrkyardigl lfqvddild  
301 vtkssqelgk tagkdlvadk vtypkllgie ksrefaekln keaqeqlagf dpekaaplia  
361 lanyiahrqn

**Gene sequence:**

1 atgagttcag tgaatttggg ctcatgggtt cacacctct acgtcttaa ccaagctacc  
61 agatccagat ccaaatccaa atcctctct ctaccttca atcctctaa aagtttagca  
121 atttcctttg cttatagaaa atcagagcga cccatttcat ctgtctctgc gattattacc  
181 aaggaagaag aaactctca agaagagcag aataatccac caccctctt tgattcaaa  
241 tctacatgc tcaaaaagg caattccatt aaccaagctt tagaagctgc cattccactc  
301 caagaaccg ctaaaatca cgagtctatg cgttattccc tctggccgg cggcaagagg  
361 gtacgaccgg cctctgctc cgctgcgtgt gagcttggtg gtgggaatga ctccatggcg  
421 atgcctgctg catgcgctgt ggaatgatt catactatgt ctctatcca tgatgacctc  
481 ccttgcatgg ataacgacga tctccgctg ggcaagccca ccaatcacat cgtgtttgga  
541 gaggacgtgg cggctctgc cggtgacga ctctagcat ttgctttga acacatcgt  
601 gtttctactt taaatgttc ttctgctaga attgtccggg cagttgggga attagcgaag  
661 gcgatcgggg cagaagggtt agttgctggc caagtagttg atataaattc tgagggtca  
721 tctgaggttg atttagagaa gcttgaattt atccatcc acaagaccgc taagttgtg  
781 gagggggctg tggctgtagg ggctatattg ggcggaggaa ccgatgagga agtggagaaa  
841 ttgaggaat atgctagga tattgggtg ttgtccaag ttgtgacga tattcttgat  
901 gtgactaat catccaaga attggggaaa actgcaggca aggacttggg ggcggacaag  
961 gttacatc ccaagcttt ggggattgag aagtcaggg aatttcaga gaagctgaat  
1021 aaggaagctc aggagcagct ggctggattt gatcctgaaa aggcagctcc attgattgct  
1081 ttgctaatt acatcgctca caggcaaac taa

## Supplementary Figure S7: Primers used for RT-PCR

**Protein name:** 14-3-3 protein

**Spot No.:** I-27

**Accession No.:** tr|F2YZ43|F2YZ43\_HEVBR

**Primer sequences:**

Primer-up: CGTGGATGTTGAGGAGCTAACTG

Primer-down: CAGAAGTCCAGAGTGTCAGATTGTC

**Protein name:** (ACAT) Acetyl-CoA C-acetyltransferase

**Spot No.:** I-13

**Accession No.:** tr|A9ZMZ4|A9ZMZ4\_HEVBR

**Primer sequences:**

Primer-up: GGTTGGATGCTTCTCAAGTTGATTAC

Primer-down: CAAGAGTTCGCCCCATCGTG

**Protein name:** (ACPX) Ascorbate peroxidase

**Spot No.:** I-228

**Accession No.:** tr|Q8GZP1|Q8GZP1\_HEVBR

**Primer sequences:**

Primer-up: GGCTGGATATTGCTGTCAGACTC

Primer-down: CGGAAGACAGGATCGGTAACAAG

**Protein name:** (ADPF) actin-depolymerizing factor

**Spot No.:** S-170

**Accession No.:** gi|298362843

**Primer sequences:**

Primer-up: TGCGGCTACTGTATCCAAACC

Primer-down: CTGCTTCACCATCCCACAAAC

**Protein name:** (ABAS) Abscisic acid stress ripening-related protein 1

**Spot No.:** I-160

**Accession No.:** tr|Q6XNP8|Q6XNP8\_HEVBR

**Primer sequences:**

Primer-up: GGCACAAGATAAAAGAGGAGGTAGC

Primer-down: GCGTATGGAGTTAAAAGGGATGG

**Protein name:** (ATPS) ATP synthase subunit beta

**Spot No.:** I-188

**Accession No.:** sp|P29685|ATPBM\_HEVBR

**Primer sequences:**

Primer-up: GTTGGTCTAACTGGGCTAACTGTGG

Primer-down: TCTTGGTGGTTGTAATACGCTCTTG

**Protein name:** (CIAD)Cinnamyl alcohol dehydrogenase

**Spot No.:** I-254

**Accession No.:** tr|E9M774|E9M774\_HEVBR

**Primer sequences:**

Primer-up: TGGTCCTATAATGATGTCTACACCGAT

Primer-down: CTTGTTCAACCCAAAGTGGCTAAG

**Protein name:** (CIBP)Citrate-binding protein

**Spot No.:** S-145

**Accession No.:** sp|Q39962|CBPR\_HEVBR

**Primer sequences:**

Primer-up: GATCCAACCTGATGGGTTCCTGAG

Primer-down: GCTTGATGTTTTTCCACCTTGATTC

**Protein name:** Copper transport protein ATOX1

**Spot No.:** I-578

**Accession No.:** tr|D4P094|D4P094\_HEVBR

**Primer sequences:**

Primer-up: GAAAGGAAACGTGCAGCCAGAG

Primer-down: ACCGAGTGTCGTATAAGGGTGCT

**Protein name:** chitinase

**Spot No.:** D-72

**Accession No.:** gi|3451147

**Primer sequences:**

Primer-up: GCAACGAAGGAACTCTAACACAAAC

Primer-down: GAATCCGAGAAATCAGCACATCC

**Protein name:** caffeic acid 3-O-methyltransferase

**Spot No.:** D-125

**Accession No.:** gi|380468126

**Primer sequences:**

Primer-up: AGTTGATGTGGGCGGTAATAGTG

Primer-down: TGTCGGGTCCTCTCTTTTCCTC

**Protein name:** Cysteine protease

**Spot No.:** I-252

**Accession No.:** tr|Q155L4|Q155L4\_HEVBR

**Primer sequences:**

Primer-up: CTTGTTCTTCGCTTCCACCTTGT

Primer-down: GGTCCGATTCTCCGAGTTATGCT

**Protein name:** Cis-prenyl transferase

**Spot No.:** I-351

**Accession No.:** tr|A9ZN23|A9ZN23\_HEVBR

**Primer sequences:**

Primer-up: GGTCCCATCCCTACTCATCTTGC

Primer-down: CTCATACTCTGATCTGCTGCGGTC

**Protein name:** Cis-prenyl transferase OS=Hevea brasiliensis

**Spot No.:** I-1585

**Accession No.:** tr|Q8W3U4|Q8W3U4\_HEVBR

**Primer sequences:**

Primer-up: GGAGGTGGTCATAAGGCTGGAT

Primer-down: TCTGCTGCGGTCTTGAGTGG

**Protein name:** Cu/Zn superoxide dismutase

**Spot No.:** D-17

**Accession No.:** gi|27449246

**Primer sequences:**

Primer-up: GTTATTACCAGCAGTGAGGGCATTAG

Primer-down: GACCTTCGTGAAAAACAACCTGACC

**Protein name:** eukaryotic translation initiation factor 5A

**Spot No.:** S-91

**Accession No.:** gi|33325129

**Primer sequences:**

Primer-up: CGCAAGAATGGTTACATCGTC

Primer-down: TCCCTTCCACTCAATAGCAATC

**Protein name:** Eukaryotic translation initiation factor

**Spot No.:** I-98

**Accession No.:** tr|B9SJV6|B9SJV6\_RICCO

**Primer sequences:**

Primer-up: CGCAAGAATGGTTACATCGTC

Primer-down: TCCCTTCCACTCAATAGCAATC

**Protein name:** Eukaryotic translation initiation factor 1Aa

**Spot No.:** I-673

**Accession No.:** tr|F8RW94|F8RW94\_HEVBR

**Primer sequences:**

Primer-up: AAGGGAAAGGGAGGTAAGAATAGGA

Primer-down: GATAGTCACGCAGCCCAACAAGT



**Protein name:** eukaryotic translation elongation factor

**Spot No.:** D-8

**Accession No.:** gi|255565836

**Primer sequences:**

Primer-up: TGCCACGGCTCAGAAGTATCG

Primer-down: GCAACCTTACATTGAACAGCCAC

**Protein name:** Enolase 1

**Spot No.:** D-6

**Accession No.:** gi|14423688

**Primer sequences:**

Primer-up: CGTTGCTAACCTCGCTGGTAAC

Primer-down: GCATAGTGCTCCCAGTCATCTTG

**Protein name:** Esterase

**Spot No.:** D-95

**Accession No.:** gi|51315784

**Primer sequences:**

Primer-up: GATTTTATCGCCGAGAGTTTCAATC

Primer-down: ACCGTCGTCTGCTGTAAGTGTATCT

**Protein name:** Elicitor-responsive protein

**Spot No.:** I-30

**Accession No.:** tr|F8SKC5|F8SKC5\_HEVBR

**Primer sequences:**

Primer-up: AATGCCTCTAGGAACTGTTGAAGTC

Primer-down: ACCGAAAATCGTATCCATCCAC

**Protein name:** Farnesyl diphosphate synthase

**Spot No.:** I-133

**Accession No.:** tr|Q8L7F4|Q8L7F4\_HEVBR

**Primer sequences:**

Primer-up: ATGGGTTGAGCGGATGTTGG

Primer-down: CTGGGAATGTGATTGCGAAGC

**Protein name:** Gamma-glutamylcysteine synthetase

**Spot No.:** I-1621

**Accession No.:** tr|D5LYI6|D5LYI6\_HEVBR

**Primer sequences:**

Primer-up: TGCCAGCATT TGGGTAGGAT

Primer-down: GTTCTAACCACCTCAGCCACTCA

**Protein name:** Beta-1,3-glucanase

**Spot No.:** I-2

**Accession No.:** tr|D1M8S7|D1M8S7\_HEVBR

**Primer sequences:**

Primer-up: ATCTCCAAAGCCTTACCAATCC

Primer-down: TGGTGAAGTGAACAAAGCATAGG

**Protein name:** Glutaredoxin

**Spot No.:** I-264

**Accession No.:** tr|B3FNP8|B3FNP8\_HEVBR

**Primer sequences:**

Primer-up: TGGATACTGAGGGCGATGGAA

Primer-down: CTTTAAAGCAGAAGCCTTAGCAAGAG

**Protein name:** Glyoxylase I

**Spot No.:** I-812

**Accession No.:** tr|E9KK00|E9KK00\_HEVBR

**Primer sequences:**

Primer-up: CTCCAAGTGACCCAGTTGAAAGA

Primer-down: GAAATACCAATATGTCCAAAGCCAC

**Protein name:** (GLUS) glutamine synthetase

**Spot No.:** S-56

**Accession No.:** gi|2213877

**Primer sequences:**

Primer-up: TGGTACGGCATTGAGCAAGAATAC

Primer-down: AGCAACGCCCCATAAGAAAGTG

**Protein name:** (GSTF) glutathione-S-transferase tau 1

**Spot No.:** D-53

**Accession No.:** gi|333690873

**Primer sequences:**

Primer-up: ATGGACTACAAAGGGAGATGAGCA

Primer-down: GCACCTCTTAGCCCAAGCAATC

**Protein name:** Pro-hevein

**Spot No.:** I-817

**Accession No.:** sp|P02877|HEVE\_HEVBR

**Primer sequences:**

Primer-up: CTATGTTGTAGCCAGTATGGGTGG

Primer-down: GTAGTTCACTGTAAGATGACCTCGTTC

**Protein name:** Hevein

**Spot No.:** I-1357

**Accession No.:** tr|Q7M1L9|Q7M1L9\_HEVBR

**Primer sequences:**

Primer-up: CTATGTTGTAGCCAGTATGGGTGG

Primer-down: GTAGTTCACTGTAAGATGACCTCGTTC

**Protein name:** Hevamine

**Spot No.:** D-93

**Accession No.:** gi|157831407

**Primer sequences:**

Primer-up: CATAGAGCATGGTTCAACCCTGTAC

Primer-down: GACCAAAGCATAACACCTCCGTAC

**Protein name:** (Hev b5) Major latex allergen Hev b 5

**Spot No.:** I-5

**Accession No.:** sp|Q39967|ALL5\_HEVBR

**Primer sequences:**

Primer-up: CAAGAAACCGCCGATGCTACA

Primer-down: CGGAACTTCTGTGGTGGCTGTC

**Protein name:** (HMGR) Hydroxymethylglutaryl coenzyme A reductase

**Spot No.:** I-119

**Accession No.:** tr|Q547W6|Q547W6\_HEVBR

**Primer sequences:**

Primer-up: TCCGTCGTGGATGGGAAGAT

Primer-down: TGGTCGCCATTGGAACAGAGT

**Protein name:** (HMGS) Hydroxymethylglutaryl coenzyme A synthase

**Spot No.:** I-22

**Accession No.:** tr|Q944F8|Q944F8\_HEVBR

**Primer sequences:**

Primer-up: CAGTGCGGTCTATGCAGAGGGT

Primer-down: GCAAGAATCAAGAGCCATGAGGT

**Protein name:** (HMGS-2) HMG-CoA synthase 2

**Spot No.:** I-1434

**Accession No.:** tr|Q6QLW8|Q6QLW8\_HEVBR

**Primer sequences:**

Primer-up: TGATCCTAACCAAATCGGTCGTC

Primer-down: GCGTCCATCCCATGAATTACTCT

**Protein name:** Heat shock protein

**Spot No.:** I-11

**Accession No.:** tr|Q71EE1|Q71EE1\_HEVBR

**Primer sequences:**

Primer-up: GGAGAATATGGCTGGACTGCTAAC

Primer-down: CGTCAATGCTCAGACCCAGTTTC

**Protein name:** latex protein allergen Hev b 7

**Spot No.:** D-76

**Accession No.:** gi|6707018

**Primer sequences:**

Primer-up: TTCTTCTCCCAGTCATCTTCTCATC

Primer-down: CTTTCAAGCCTGCCAGTATCC

**Protein name:** (LAP1) latex abundant protein 1

**Spot No.:** D-111

**Accession No.:** gi|37901124

**Primer sequences:**

Primer-up: ACTATGATTATCCCGACTTCACCTG

Primer-down: TCACATAGATTGCACAACGGAAC

**Protein name:** (LAC) latex cystatin

**Spot No.:** D-102

**Accession No.:** gi|268321205

**Primer sequences:**

Primer-up: GGCAAAACTAGGAGGTGTTAAGGAAG

Primer-down: GCTGTAGAGTCTGAAGGGGCATC

**Protein name:** (MEVD) Mevalonate disphosphate decarboxylase

**Spot No.:** I-18

**Accession No.:** tr|Q944G0|Q944G0\_HEVBR

**Primer sequences:**

Primer-up: CACCACAGGAATGCGTGAGACT

Primer-down: CGTTCATGTAGAAAATTGGAGGACA

**Protein name:** (MEVK) Mevalonate kinase

**Spot No.:** I-1957

**Accession No.:** tr|Q944G2|Q944G2\_HEVBR

**Primer sequences:**

Primer-up: TCTGATCTTCCACTGGGTTTCAGG

Primer-down: CTTGATGCGAGTCAGATTACCAGAC



**Protein name:** MYC2

**Spot No.:** I-159

**Accession No.:** tr|D2CRK4|D2CRK4\_HEVBR

**Primer sequences:**

Primer-up: AAGAGGAAGAACCCAACTGAACG

Primer-down: ATCGGTGCTCTGATTGTCGGT

**Protein name:** (NUDK) nucleoside diphosphate kinase 1

**Spot No.:** S-93

**Accession No.:** gi|312985291

**Primer sequences:**

Primer-up: CTAATCACTGTGGAGCGCTTG

Primer-down: CGGGTGAAGGCTGCTTGA

**Protein name:** Invertase 2

**Spot No.:** I-50

**Accession No.:** tr|E9KF95|E9KF95\_HEVBR

**Primer sequences:**

Primer-up: CACCAGAGGCGGTCTTGATTACT

Primer-down: TCAGAAAAGCCAGGGCACTAGG

**Protein name:** (PDBP) Pyridoxal biosynthesis protein PDX1

**Spot No.:** I-150

**Accession No.:** sp|Q39963|PDX1\_HEVBR

**Primer sequences:**

Primer-up: AGTCCGTTACCATCCCCGTCA

Primer-down: CATTCCCTGTTCTGCTTCACC

**Protein name:** (PHOT)Phosphoglyceride transfer family protein

**Spot No.:** I-175

**Accession No.:** tr|Q6J6I5|Q6J6I5\_HEVBR

**Primer sequences:**

Primer-up: GATTTGATGAGAAGCCAACCCAC

Primer-down: CATATTAGCCTGGTTGCTTTAATCG

**Protein name:** (PROI) Protease inhibitor protein

**Spot No.:** I-366

**Accession No.:** tr|B3FNP9|B3FNP9\_HEVBR

**Primer sequences:**

Primer-up: TCGGGACAAACGGGGACAT

Primer-down: GGTAATAAATTCGTTGTTTAGCCAATG

**Protein name:** (PPCI) Peptidyl-prolyl cis-trans isomerase

**Spot No.:** I-33

**Accession No.:** tr|B3FNQ1|B3FNQ1\_HEVBR

**Primer sequences:**

Primer-up: GCGGATACAACGCCACGAAC

Primer-down: CCCTCCACAACCTCTACCAAACACC

**Protein name:** Profilin-1

**Spot No.:** I-567

**Accession No.:** sp|O65812|PROF1\_HEVBR

**Primer sequences:**

Primer-up: CTGCCATTATGAGTGACTTTGACG

Primer-down: TGTCTTCCTAACAGTAACACCACCAG

**Protein name:** prohevein

**Spot No.:** D-10

**Accession No.:** gi|2832430

**Primer sequences:**

Primer-up: GAAGGTGTTGGTGGTGGGAAGTG

Primer-down: TGATGATTCATAACGGAGAATAGAGG

**Protein name:** Pseudo-hevein

**Spot No.:** D-140

**Accession No.:** tr|Q6KF83|Q6KF83\_HEVBR

**Primer sequences:**

Primer-up: GATGGGATTTGAACGCTGTAAGTG

Primer-down: TGGAGAATAGAGGGTTGAAGGAATC

**Protein name:** Rab4

**Spot No.:** I-227

**Accession No.:** tr|F2VXU6|F2VXU6\_HEVBR

**Primer sequences:**

Primer-up: CTCCTCTTGCCTGTTGCCTCT

Primer-down: GCAGCTTAATTGTCTTGCCATCC

**Protein name:** (REF-1) rubber elongation factor

**Spot No.:** D-85

**Accession No.:** gi|38122474

**Primer sequences:**

Primer-up: CAAGGACAAGTCTGGTCCATTC

Primer-down: TATGAACATCCAAAACACACGAC

**Protein name:** Rubber elongation factor

**Spot No.:** D-139

**Accession No.:** gi|132270

**Primer sequences:**

Primer-up: CAAAGACAAATCTGGTCCACTG

Primer-down: AAACATAGTCTCAACACTCAGGATG

**Protein name: (SRPP-1) small rubber particle protein**

**Spot No.:** D-99

**Accession No.:** gi|29170601

**Primer sequences:**

Primer-up: CCGTTGAAGCCTGGGGTC

Primer-down: CCACATCCAAAACACACCACC

**Protein name:** Small rubber particle protein

**Spot No.:** I-66

**Accession No.:** tr|Q84T87|Q84T87\_HEVBR

**Primer sequences:**

Primer-up: CGTGTTCCGCCAGTTGTCAAG

Primer-down: GTAGGCACCAAAGGCAAATAAGAG

**Protein name:** (SRPP-3) Small rubber particle protein

**Spot No.:** D-52

**Accession No.:** gi|14423933

**Primer sequences:**

Primer-up: TGAAGAGGTGGAGGAAGAGAGG

Primer-down: CCACATCCAAAACACACCACC

**Protein name:** (TMAP) Translation machinery-associated protein

**Spot No.:** I-643

**Accession No.:** tr|D9IZZ6|D9IZZ6\_HEVBR

**Primer sequences:**

Primer-up: AGCAAGGTGGAAAAGCAAAGC

Primer-down: CTTGAGCCCAGAACCTCCGA

**Protein name:** Ubiquitin-protein ligase 2a

**Spot No.:** I-943

**Accession No.:** tr|F8RWT0|F8RWT0\_HEVBR

**Primer sequences:**

Primer-up: AGACTGATGAGGGATTTTAGGAGGT

Primer-down: TGA CTGGATTGATGTGAGTATGGC

**Protein name:** (VHA-F) V-type proton ATPase subunit F

**Spot No.:** I-687

**Accession No.:** tr|B8Y6I1|B8Y6I1\_HEVBR

**Primer sequences:**

Primer-up: TGCTGATGAGGACTCAGTAGTTGGA

Primer-down: CCTGTGCAGGATCATAAGGATGG

**Protein name:** (50KP) 50 kDa protein; major latex allergen Hev b 4

**Spot No.:** D-2

**Accession No.:** gi|37719658

**Primer sequences:**

Primer-up: GGAAGATTTTCTGATGGTCGCAC

Primer-down: CACGATATGTCGAATTGCCACAG

**Protein name:** (VHAE) V-type proton ATPase subunit E

**Spot No.:** D-58

**Accession No.:** gi|356528948

**Primer sequences:**

Primer-up: ATGGTCAGATTCATCCGTCAGG

Primer-down: TGTGGTTAATGCCATGAAAGAGG

**Protein name:** calmodulin

**Spot No.:** D-105

**Accession No.:** gi|354318

**Primer sequences:**

Primer-up: TCACTGGGACAGAATCCTACCG

Primer-down: CTTCTCGCCAAGGTTTGTTCATC

**Protein name:** (CDCP) cell division cycle protein

**Spot No.:** D-130

**Accession No.:** gi|351727028

**Primer sequences:**

Primer-up: GGTGGTGTAGAAAACAGATGGC

Primer-down: CCAATGACAATAACATGAGCACG

**The abbreviations for the proteins were:**

ATPS, ATP synthase subunit beta; ACAT, Acetyl-CoA C-acetyltransferase;

REF, rubber elongation factor; SRPP, small rubber particle protein;

VHAF, V-type proton ATPase subunit; ACPX, Ascorbate peroxidase;

GGCS, Gamma-glutamylcysteine synthetase; VHAE, V-type proton

ATPase subunit E; GLUS, glutamine synthetase; GSTF,

glutathione-S-transferase;HSP70, heat shock protein 70; PDBP, Pyridoxal

biosynthesis protein; CAMT, caffeic acid

3-O-methyltransferase;CYSP,Cysteine protease; CIPT, Cis-prenyl



transferase; ETIF, eukaryotic translation initiation factor; ETEF, eukaryotic translation elongation factor; ELRP, Elicitor-responsive protein; LAC, latex cystatin; TMAP, Translation machinery-associated protein; COPT, Copper transport protein; 50KP, 50 kDa protein; Gluc, beta-1,3-glucanase; CDCP, cell division cycle protein; ABAS, Abscisic acid stress ripening-related protein; ADPF, actin-depolymerizing factor; PROI, Protease inhibitor protein; HMGR, Hydroxymethylglutaryl coenzyme A reductase; HMGS, Hydroxymethylglutaryl coenzyme A synthase; PPCI, Peptidyl-prolyl cis-trans isomerase; MEVD, Mevalonate disphosphate decarboxylase; MEVK, Mevalonate kinase; ProH, prohevein; PseuH, Pseudo-hevein; FADS, Farnesyl diphosphate synthase; GLUD, Glutaredoxin; LAP, latex abundant protein; CIAD, Cinnamyl alcohol dehydrogenase; CIBP, Citrate-binding protein; SOD, Superoxide dismutase; NUDK, nucleoside diphosphate kinase; PHOT, Phosphoglyceride transfer family protei; SUCT, sucrose transporter; PHOK, phosphomevalonate kinase; HYDL, hydroxynitrile lyase; CDPK, calcium-dependent protein kinase; ETHI, ethylene-inducible protein; GLUR, glutathione reductase; LACG, latex cyanogenic beta glucosidase; CYAS, beta-cyanoalanine synthase; GGDS, geranylgeranyl diphosphate synthase.

**Supplementary Table S1** MS identification of high abundant rubber latex proteins 2-DE gels

| <b>Spot No.<sup>a</sup></b> | <b>Vol%<sup>b</sup></b> | <b>Exper.<sup>c</sup><br/>pI/Mr</b> | <b>Thero.<sup>d</sup><br/>pI/Mr</b> | <b>M.S.<sup>e</sup><br/>Score</b> | <b>NCBI<br/>No.<sup>f</sup></b> | <b>Plant<br/>species</b> | <b>Protein name</b>                       |
|-----------------------------|-------------------------|-------------------------------------|-------------------------------------|-----------------------------------|---------------------------------|--------------------------|-------------------------------------------|
| 1                           | 4.47                    | 4.96/14                             | 5.04/14.7                           | 122                               | 132270                          | <i>H. brasiliensis</i>   | Rubber elongation factor protein          |
| 2                           | 4.18                    | 4.92/13                             | 5.04/14.7                           | 142                               | 132270                          | <i>H. brasiliensis</i>   | Rubber elongation factor protein          |
| 3                           | 3.09                    | 4.88/13                             | 5.04/14.7                           | 95                                | 132270                          | <i>H. brasiliensis</i>   | Rubber elongation factor protein          |
| 4                           | 2.69                    | 4.8/22                              | 4.8/22.3                            | 119                               | 14423933                        | <i>H. brasiliensis</i>   | Small rubber particle protein             |
| 5                           | 1.12                    | 4.9/23                              | 4.8/22.3                            | 122                               | 14423933                        | <i>H. brasiliensis</i>   | Small rubber particle protein             |
| 6                           | 1.24                    | 4.82/23                             | 4.8/22.3                            | 135                               | 14423933                        | <i>H. brasiliensis</i>   | Small rubber particle protein             |
| 7                           | 0.0296                  | 4.72/14                             | 4.61/12.8                           | [121]                             | 29170601                        | <i>H. brasiliensis</i>   | small rubber particle protein             |
| 8                           | 0.034                   | 4.74/14                             | 4.61/12.8                           | [110]                             | 29170601                        | <i>H. brasiliensis</i>   | small rubber particle protein             |
| 9                           | 0.0969                  | 4.88/26                             | 4.79/29.5                           | 93                                | 388503664                       | <i>L. japonicus</i>      | unknown                                   |
| 10                          | 0.434                   | 4.98/40                             | 5.0/43.0                            | 209                               | 3288200                         | <i>H. brasiliensis</i>   | latex allergen                            |
| 11                          | 0.834                   | 5.01/40                             | 5.0/43.1                            | 172                               | 6707018                         | <i>H. brasiliensis</i>   | latex protein allergen Hev b 7            |
| 12                          | 0.214                   | 5.07/49                             | 5.01/46.4                           | 82                                | 4235430                         | <i>H. brasiliensis</i>   | latex-abundant protein                    |
| 13                          | 0.135                   | 5.05/49                             | 5.01/46.6                           | 96                                | 4235430                         | <i>H. brasiliensis</i>   | latex-abundant protein                    |
| 14                          | 0.335                   | 5.09/54                             | 5.07/71.1                           | 103                               | 20559                           | <i>P. hybrida</i>        | hsp70 (AA 6 - 651)                        |
| 15                          | 0.513                   | 5.16/40                             | 5.31/42.0                           | 142                               | 58013197                        | <i>I. tinctoria</i>      | actin                                     |
| 16                          | 0.0655                  | 5.21/52                             | 5.2/69.1                            | 174                               | 225429795                       | <i>V. vinifera</i>       | V-type proton ATPase, subunit A           |
| 17                          | 0.137                   | 5.29/47                             | 7.56/59.9                           | 92                                | 357480067                       | <i>M. truncatula</i>     | Leucine aminopeptidase                    |
| 18                          | 0.139                   | 5.31/44                             | 5.91/30.8                           | 81                                | 219885949                       | <i>Z. mays</i>           | unknown                                   |
| 19                          | 0.309                   | 5.28/33                             | 5.93/34.3                           | [101]                             | 242059605                       | <i>S. bicolor</i>        | hypothetical protein                      |
| 20                          | 0.145                   | 5.18/15                             | 8.01/11.2                           | [86]                              | 30575570                        | <i>C. paradisi</i>       | HSP19 class II, partial                   |
| 21                          | 0.458                   | 5.33/16                             | 5.73/15.7                           | 83                                | 27449246                        | <i>H. brasiliensis</i>   | Cu/Zn superoxide dismutase                |
| 22                          | 0.656                   | 5.61/15                             | 8.29/35.1                           | [60]                              | 37806305                        | <i>O. sativa</i>         | hypothetical protein                      |
| 23                          | 0.0912                  | 5.55/33                             | 9.46/35.3                           | 85                                | 10946499                        | <i>H. brasiliensis</i>   | beta-1,3-glucanase                        |
| 24                          | 0.363                   | 5.62/36                             | 6.01/36.0                           | 82                                | 78216493                        | <i>M. domestica</i>      | cytosolic malate dehydrogenase            |
| 25                          | 0.567                   | 5.77/32                             | 6.41/36.0                           | [81]                              | 257219562                       | <i>J. curcas</i>         | annexin-like protein                      |
| 26                          | 0.852                   | 5.69/27                             | 8.72/34.1                           | [56]                              | 3451147                         | <i>H. brasiliensis</i>   | chitinase                                 |
| 27                          | 0.442                   | 5.75/30                             | 9.45/38.9                           | 97                                | 4469175                         | <i>H. brasiliensis</i>   | beta-1,3-glucanase                        |
| 28                          | 0.652                   | 6.89/33                             | 9.4/41.5                            | 99                                | 124365253                       | <i>H. brasiliensis</i>   | beta-1,3-glucanase                        |
| 29                          | 0.803                   | 6.85/34                             | 9.4/41.5                            | 109                               | 124365253                       | <i>H. brasiliensis</i>   | beta-1,3-glucanase                        |
| 30                          | 0.728                   | 6.75/33                             | 7.1/36.9                            | 86                                | 255540341                       | <i>R. communis</i>       | glyceraldehyde 3-phosphate dehydrogenase  |
| 31                          | 0.447                   | 6.87/35                             | 7.7/36.8                            | 121                               | 4539543                         | <i>N. tabacum</i>        | glyceraldehyde-3-phosphate dehydrogenase  |
| 32                          | 0.139                   | 5.6/45                              | 5.68/51.9                           | 99                                | 32527831                        | <i>P. tremuloides</i>    | UDP-glucose pyrophosphorylase             |
| 33                          | 0.104                   | 5.55/39                             | 5.0/43.1                            | 171                               | 6707018                         | <i>H. brasiliensis</i>   | latex protein allergen Hev b 7            |
| 34                          | 0.111                   | 5.49/48                             | 5.49/48.0                           | 123                               | 158144895                       | <i>G. hirsutum</i>       | enolase                                   |
| 35                          | 0.131                   | 4.95/40                             | 5.0/43.0                            | [81]                              | 3288200                         | <i>H. brasiliensis</i>   | latex allergen                            |
| 36                          | 0.0215                  | 4.91/39                             | 5.0/43.0                            | [138]                             | 1916805                         | <i>H. brasiliensis</i>   | latex patatin homolog                     |
| 37                          | 0.122                   | 5.03/40                             | 5.12/43.0                           | 152                               | 41581137                        | <i>H. brasiliensis</i>   | latex allergen hev b 7.02                 |
| 38                          | 0.0897                  | 5.06/40                             | 5.12/43.0                           | 142                               | 41581137                        | <i>H. brasiliensis</i>   | latex allergen hev b 7.02                 |
| 39                          | 0.0134                  | 5.11/72                             | 5.13/90.4                           | 136                               | 255556934                       | <i>R. communis</i>       | Transitional endoplasmic reticulum ATPase |
| 40                          | 0.183                   | 5.16/42                             | 5.31/41.9                           | 125                               | 149938964                       | <i>A. deliciosa</i>      | ACT1                                      |
| 41                          | 0.0147                  | 5.39/46                             | 9.34/41.4                           | 83                                | 159489771                       | <i>C. reinhardtii</i>    | predicted protein                         |

|    |        |         |           |       |           |                        |                                      |
|----|--------|---------|-----------|-------|-----------|------------------------|--------------------------------------|
| 42 | 0.0412 | 5.46/44 | 5.57/48.0 | 97    | 14423688  | <i>H. brasiliensis</i> | Enolase 1                            |
| 43 | 0.0132 | 5.54/62 | 5.62/111  | 90    | 23503558  | <i>L. japonicus</i>    | phosphoenolpyruvate carboxylase      |
| 44 | 0.0841 | 5.51/38 | 9.61/62.6 | 82    | 382929047 | <i>H. hirsuta</i>      | maturase K (chloroplast)             |
| 45 | 0.142  | 5.52/34 | 9.45/38.9 | 156   | 4469175   | <i>H. brasiliensis</i> | beta-1,3-glucanase                   |
| 46 | 0.045  | 5.65/33 | 9.45/38.9 | 126   | 4469175   | <i>H. brasiliensis</i> | beta-1,3-glucanase                   |
| 47 | 0.0134 | 5.65/27 | 6.18/35.9 | [65]  | 225438145 | <i>V. vinifera</i>     | malate dehydrogenase, cytoplasmic    |
| 48 | 0.177  | 5.63/28 | 6.18/35.9 | [85]  | 225438145 | <i>V. vinifera</i>     | malate dehydrogenase, cytoplasmic    |
| 49 | 0.0563 | 5.2/33  | 6.5/32.1  | [75]  | 255552291 | <i>R. communis</i>     | short chain dehydrogenase, putative  |
| 50 | 0.057  | 4.75/15 | 4.61/12.8 | [240] | 29170601  | <i>H. brasiliensis</i> | small rubber particle protein        |
| 51 | 0.638  | 5.05/13 | 5.04/14.7 | 103   | 132270    | <i>H. brasiliensis</i> | Rubber elongation factor protein     |
| 52 | 0.339  | 5.15/13 | 5.04/14.7 | 115   | 132270    | <i>H. brasiliensis</i> | Rubber elongation factor protein     |
| 53 | 0.0984 | 5.28/17 | 5.57/17.5 | [61]  | 115187464 | <i>A. hypogaea</i>     | thioredoxin fold                     |
| 54 | 0.0297 | 5.64/16 | 6.22/34.3 | 84    | 34538473  | <i>H. vulgare</i>      | caleosin 1                           |
| 55 | 0.201  | 5.72/15 | 9.57/19.2 | 88    | 225440278 | <i>V. vinifera</i>     | hypothetical protein                 |
| 56 | 0.0897 | 5.07/54 | 5.81/39.5 | 83    | 2213877   | <i>H. brasiliensis</i> | glutamine synthetase                 |
| 57 | 0.0301 | 5.1/54  | 5.21/71.5 | 102   | 172050753 | <i>C. spinosa</i>      | 70 kDa heat shock protein            |
| 58 | 0.0356 | 5.12/54 | 5.18/71.9 | [151] | 762844    | <i>S. lycopersicum</i> | Hsc70                                |
| 59 | 0.0783 | 5.0/57  | 4.98/80.4 | 107   | 356552478 | <i>G. max</i>          | heat shock cognate protein 80-like   |
| 60 | 0.0132 | 5.01/56 | 5.07/52.1 | [51]  | 356510919 | <i>G. max</i>          | UDP-glycosyltransferase 75D1-like    |
| 61 | 0.0163 | 5.03/49 | 5.49/47.1 | 144   | 255560725 | <i>R. communis</i>     | dead box ATP-dependent RNA helicase  |
| 62 | 0.0271 | 5.06/46 | 5.01/46.4 | [142] | 4235430   | <i>H. brasiliensis</i> | latex-abundant protein               |
| 63 | 0.0401 | 4.91/46 | 4.65/41.4 | [76]  | 255578278 | <i>R. communis</i>     | hypothetical protein                 |
| 64 | 0.0176 | 5.14/46 | 5.15/47.1 | [98]  | 5302811   | <i>A. thaliana</i>     | serine protease-like protein         |
| 65 | 0.0171 | 5.13/51 | 5.85/63.3 | 102   | 2506277   | <i>P. sativum</i>      | 60 kDa chaperonin subunit beta       |
| 66 | 0.0193 | 5.16/54 | 5.27/72.0 | 88    | 255543357 | <i>R. communis</i>     | heat shock protein, putative         |
| 67 | 0.025  | 5.18/48 | 4.54/46.1 | [91]  | 224100473 | <i>P. trichocarpa</i>  | predicted protein                    |
| 68 | 0.0265 | 5.21/48 | 5.72/56.3 | 84    | 31580730  | <i>H. brasiliensis</i> | latex cyanogenic beta glucosidase    |
| 69 | 0.0379 | 5.27/44 | 5.44/50.1 | 83    | 2501850   | <i>N. tabacum</i>      | GDP dissociation inhibitor           |
| 70 | 0.0152 | 5.3/44  | 5.44/50.1 | [202] | 2501850   | <i>N. tabacum</i>      | GDP dissociation inhibitor           |
| 71 | 0.549  | 5.21/43 | 5.42/47.2 | 147   | 359478860 | <i>V. vinifera</i>     | 26S protease regulatory subunit 6B   |
| 72 | 0.126  | 5.13/42 | 5.28/47.1 | [128] | 224071449 | <i>P. trichocarpa</i>  | phospholipase A                      |
| 73 | 0.0841 | 5.12/40 | 5.37/41.9 | 178   | 32186912  | <i>G. hirsutum</i>     | actin                                |
| 74 | 0.0304 | 4.98/34 | 4.79/48.0 | [70]  | 297816956 | <i>A. lyrata</i>       | hypothetical protein                 |
| 75 | 0.0404 | 4.9/32  | 4.72/28.9 | [74]  | 3264769   | <i>P. armeniaca</i>    | late embryogenesis-like protein      |
| 76 | 0.0574 | 4.93/32 | 5.24/42.0 | 81    | 168066110 | <i>P. patens</i>       | predicted protein                    |
| 77 | 0.0683 | 4.89/30 | 4.79/29.5 | 109   | 388503664 | <i>L. japonicus</i>    | unknown                              |
| 78 | 0.0174 | 5.0/35  | 4.84/24.3 | [71]  | 115468882 | <i>O. sativa</i>       | Os06g0608500                         |
| 79 | 0.0627 | 5.06/33 | 5.51/61.1 | [104] | 356532109 | <i>G. max</i>          | phosphoglycerate mutase              |
| 80 | 0.0124 | 5.05/31 | 5.11/59.2 | 90    | 224056489 | <i>P. trichocarpa</i>  | predicted protein                    |
| 81 | 0.185  | 5.14/34 | 6.5/32.1  | [174] | 255552291 | <i>R. communis</i>     | short chain dehydrogenase, putative  |
| 82 | 0.133  | 5.29/38 | 5.49/39.3 | 91    | 2073448   | <i>L. japonicus</i>    | glutamine synthetase                 |
| 83 | 0.0563 | 5.1/31  | 6.07/27.5 | [204] | 192912956 | <i>E. guineensis</i>   | aluminum-induced protein             |
| 84 | 0.0517 | 5.06/28 | 5.12/32.9 | [254] | 255559601 | <i>R. communis</i>     | alpha-soluble nsf attachment protein |
| 85 | 0.0808 | 4.98/27 | 5.84/27.4 | [69]  | 224099853 | <i>P. trichocarpa</i>  | predicted protein                    |

|            |        |         |           |       |           |                        |                                             |
|------------|--------|---------|-----------|-------|-----------|------------------------|---------------------------------------------|
| <b>86</b>  | 0.438  | 5.17/21 | 5.06/19.6 | [410] | 38122474  | <i>H. brasiliensis</i> | rubber elongation factor                    |
| <b>87</b>  | 0.0478 | 5.21/22 | 5.06/19.6 | [226] | 38122474  | <i>H. brasiliensis</i> | rubber elongation factor                    |
| <b>88</b>  | 0.0734 | 5.13/21 | 5.06/19.6 | 116   | 38122474  | <i>H. brasiliensis</i> | rubber elongation factor                    |
| <b>89</b>  | 0.0575 | 5.14/23 | 5.06/19.6 | 99    | 38122474  | <i>H. brasiliensis</i> | rubber elongation factor                    |
| <b>90</b>  | 1.88   | 4.62/19 | 4.06/15.2 | [496] | 334854634 | <i>H. brasiliensis</i> | elicitor-responsive protein                 |
| <b>91</b>  | 0.156  | 5.35/17 | 5.6/17.7  | [95]  | 33325129  | <i>H. brasiliensis</i> | eukaryotic translation initiation factor 5A |
| <b>92</b>  | 0.0403 | 5.37/16 | 5.39/18.0 | [180] | 224144943 | <i>P. trichocarpa</i>  | predicted protein                           |
| <b>93</b>  | 0.299  | 6.68/13 | 6.85/16.3 | 84    | 312985291 | <i>H. brasiliensis</i> | nucleoside diphosphate kinase 1             |
| <b>94</b>  | 0.376  | 6.74/16 | 5.63/22.7 | 96    | 123062    | <i>H. brasiliensis</i> | Pro-hevein                                  |
| <b>95</b>  | 0.274  | 6.61/15 | 7.77/20.7 | [70]  | 313586569 | <i>H. brasiliensis</i> | hypothetical protein 19                     |
| <b>96</b>  | 0.0897 | 6.65/14 | 7.77/20.7 | 94    | 313586569 | <i>H. brasiliensis</i> | hypothetical protein 19                     |
| <b>97</b>  | 0.414  | 6.78/16 | 8.94/40.7 | 84    | 4835766   | <i>A. thaliana</i>     | transfactor (WERBP-1)                       |
| <b>98</b>  | 0.0367 | 5.42/22 | 5.06/19.6 | 99    | 38122474  | <i>H. brasiliensis</i> | rubber elongation factor                    |
| <b>99</b>  | 0.107  | 5.34/24 | 5.71/26.1 | [73]  | 3377751   | <i>M. crystallinum</i> | glutathione S-transferase                   |
| <b>100</b> | 0.0804 | 5.35/26 | 6.17/27.5 | [49]  | 1709761   | <i>S. oleracea</i>     | Proteasome subunit alpha type-4             |
| <b>101</b> | 0.0483 | 5.47/26 | 5.78/27.5 | [434] | 27449248  | <i>H. brasiliensis</i> | ascorbate peroxidase                        |
| <b>102</b> | 0.142  | 5.48/26 | 6.0/27.5  | [193] | 211906460 | <i>G. hirsutum</i>     | triosephosphate isomerase                   |
| <b>103</b> | 0.0357 | 5.22/21 | 5.06/19.6 | 125   | 38122474  | <i>H. brasiliensis</i> | rubber elongation factor                    |
| <b>104</b> | 0.345  | 5.75/19 | 8.72/34.1 | 153   | 3451147   | <i>H. brasiliensis</i> | chitinase                                   |
| <b>105</b> | 0.15   | 5.75/23 | 8.44/29.9 | 93    | 157831407 | <i>H. brasiliensis</i> | Chain A, Crystal Structures Of Hevamine     |
| <b>106</b> | 0.231  | 5.74/24 | 8.44/29.9 | 99    | 157831407 | <i>H. brasiliensis</i> | Chain A, Crystal Structures Of Hevamine     |
| <b>107</b> | 0.148  | 5.77/20 | 8.72/34.1 | 83    | 3451147   | <i>H. brasiliensis</i> | chitinase                                   |
| <b>108</b> | 0.0327 | 5.52/33 | 5.89/27.9 | [89]  | 3127890   | <i>C. arietinum</i>    | cysteine synthase, O-acetyl-lyase           |
| <b>109</b> | 0.0761 | 5.39/37 | 5.44/40.0 | [163] | 114199044 | <i>M. domestica</i>    | caffeic acid O-methyltransferase            |
| <b>110</b> | 0.0405 | 5.38/44 | 5.57/48.0 | 158   | 14423688  | <i>H. brasiliensis</i> | Enolase 1                                   |
| <b>111</b> | 0.0239 | 5.39/44 | 5.57/48.0 | 175   | 14423688  | <i>H. brasiliensis</i> | Enolase 1                                   |
| <b>112</b> | 0.0339 | 5.38/44 | 6.05/25.1 | 85    | 226897734 | <i>T. flavum</i>       | norcochlorine 6-O-methyltransferase         |
| <b>113</b> | 0.0262 | 5.38/49 | 5.53/54.1 | [49]  | 255565071 | <i>R. communis</i>     | conserved hypothetical protein              |
| <b>114</b> | 0.0502 | 5.47/51 | 5.52/61.0 | 96    | 1346735   | <i>R. communis</i>     | Phosphoglyceromutase                        |
| <b>115</b> | 0.0152 | 5.51/61 | 5.87/95.0 | 141   | 255565836 | <i>R. communis</i>     | eukaryotic translation elongation factor    |
| <b>116</b> | 0.0926 | 5.02/39 | 5.0/43.1  | 147   | 6707018   | <i>H. brasiliensis</i> | latex protein allergen Hev b 7              |
| <b>117</b> | 0.0363 | 5.05/39 | 5.0/43.9  | [59]  | 51315784  | <i>H. brasiliensis</i> | Esterase                                    |
| <b>118</b> | 0.0152 | 5.29/21 | 5.06/19.6 | 98    | 38122474  | <i>H. brasiliensis</i> | rubber elongation factor                    |
| <b>119</b> | 0.0968 | 5.34/46 | 5.41/47.8 | [51]  | 3023685   | <i>A. glutinosa</i>    | Enolase                                     |
| <b>120</b> | 0.0518 | 5.28/41 | 4.83/22.0 | 81    | 351723039 | <i>G. max</i>          | uncharacterized protein                     |
| <b>121</b> | 0.0992 | 5.02/27 | 7.63/31.6 | [55]  | 255554865 | <i>R. communis</i>     | lactoylglutathione lyase, putative          |
| <b>122</b> | 0.139  | 5.35/26 | 5.59/18.4 | [83]  | 118485535 | <i>P. trichocarpa</i>  | unknown                                     |
| <b>123</b> | 0.152  | 5.51/26 | 5.93/27.6 | 86    | 15225839  | <i>A. thaliana</i>     | proteasome subunit alpha type-3             |
| <b>124</b> | 0.179  | 5.49/23 | 6.06/23.0 | 81    | 10862818  | <i>H. brasiliensis</i> | IgE-binding protein Mn SOD                  |
| <b>125</b> | 0.153  | 5.17/24 | 7.7/25.7  | [53]  | 1737447   | <i>E. globulus</i>     | auxin-induced protein                       |
| <b>126</b> | 0.104  | 4.45/15 | 4.61/12.8 | [97]  | 29170601  | <i>H. brasiliensis</i> | small rubber particle protein               |
| <b>127</b> | 0.119  | 5.46/13 | 5.64/20.9 | [84]  | 2832430   | <i>H. brasiliensis</i> | prohevein                                   |
| <b>128</b> | 0.065  | 5.55/14 | 6.82/15.0 | [68]  | 224054224 | <i>P. trichocarpa</i>  | predicted protein                           |
| <b>129</b> | 0.178  | 5.31/12 | 5.89/13.3 | [61]  | 329750601 | <i>H. brasiliensis</i> | thioredoxin H-type 2                        |

|            |         |         |           |       |           |                        |                                  |
|------------|---------|---------|-----------|-------|-----------|------------------------|----------------------------------|
| <b>130</b> | 0.532   | 5.01/11 | 5.45/11.2 | 81    | 268321205 | <i>H. brasiliensis</i> | latex cystatin                   |
| <b>131</b> | 1.01    | 5.02/13 | 5.04/14.7 | [539] | 132270    | <i>H. brasiliensis</i> | Rubber elongation factor protein |
| <b>132</b> | 0.105   | 5.45/13 | 5.04/14.7 | 138   | 132270    | <i>H. brasiliensis</i> | Rubber elongation factor protein |
| <b>133</b> | 0.117   | 5.16/15 | 6.4/8.6   | 81    | 242083244 | <i>S. bicolor</i>      | hypothetical protein             |
| <b>134</b> | 0.0976  | 4.94/13 | 4.61/12.8 | [85]  | 29170601  | <i>H. brasiliensis</i> | small rubber particle protein    |
| <b>135</b> | 0.0865  | 4.86/15 | 4.61/12.8 | [493] | 29170601  | <i>H. brasiliensis</i> | small rubber particle protein    |
| <b>136</b> | 0.448   | 4.13/13 | 4.1/16.9  | [128] | 354318    | <i>T. aestivum</i>     | calmodulin                       |
| <b>137</b> | 0.0284  | 4.12/21 | 4.8/22.3  | 85    | 14423933  | <i>H. brasiliensis</i> | Small rubber particle protein    |
| <b>138</b> | 0.0653  | 4.45/24 | 4.8/22.3  | 165   | 14423933  | <i>H. brasiliensis</i> | Small rubber particle protein    |
| <b>139</b> | 0.0351  | 5.36/47 | 5.57/48.0 | 107   | 14423688  | <i>H. brasiliensis</i> | Enolase 1                        |
| <b>140</b> | 0.149   | 4.87/19 | 5.04/14.7 | [52]  | 132270    | <i>H. brasiliensis</i> | Rubber elongation factor protein |
| <b>141</b> | 0.0517  | 5.38/45 | 5.57/48.0 | 165   | 14423688  | <i>H. brasiliensis</i> | Enolase 1                        |
| <b>142</b> | 0.083   | 5.43/44 | 5.92/48.1 | [766] | 14423687  | <i>H. brasiliensis</i> | Enolase 2                        |
| <b>143</b> | 0.115   | 5.01/26 | 5.48/25.6 | [52]  | 333690873 | <i>H. brasiliensis</i> | glutathione-S-transferase tau 1  |
| <b>144</b> | 0.0957  | 5.33/53 | 8.78/43.5 | 82    | 242080619 | <i>S. bicolor</i>      | hypothetical protein             |
| <b>145</b> | 0.101   | 5.09/15 | 5.95/17.6 | [87]  | 140083605 | <i>R. hybrid</i>       | cytosolic class II small HSP17.5 |
| <b>146</b> | 0.0217  | 4.02/41 | 5.01/14.6 | [88]  | 37901124  | <i>H. brasiliensis</i> | latex abundant protein 1         |
| <b>147</b> | 0.0256  | 4.35/40 | 4.53/38.0 | [173] | 359806300 | <i>G. max</i>          | uncharacterized protein          |
| <b>148</b> | 0.0301  | 4.28/38 | 4.53/38.1 | [166] | 37625031  | <i>V. aestivalis</i>   | ankyrin-repeat protein           |
| <b>149</b> | 0.0356  | 4.39/38 | 4.45/37.5 | [71]  | 13310811  | <i>N. tabacum</i>      | ankyrin-repeat protein HBP1      |
| <b>150</b> | 0.518   | 5.18/42 | 5.64/42.2 | [180] | 129916    | <i>T. aestivum</i>     | Phosphoglycerate kinase          |
| <b>151</b> | 0.0258  | 4.31/36 | 4.5/25.3  | [117] | 378464888 | <i>A. mongolicus</i>   | translation elongation factor    |
| <b>152</b> | 0.0335  | 4.43/32 | 4.5/25.1  | [107] | 225456295 | <i>V. vinifera</i>     | elongation factor 1-delta-like   |
| <b>153</b> | 0.0201  | 4.83/30 | 5.26/35.7 | [132] | 22261807  | <i>S. tuberosum</i>    | Light-induced protein            |
| <b>154</b> | 0.0125  | 4.89/31 | 4.82/28.9 | 83    | 345103803 | <i>G. thurberi</i>     | 14-3-3-like protein, partial     |
| <b>155</b> | 0.0549  | 5.08/26 | 4.76/29.9 | [384] | 326694865 | <i>H. brasiliensis</i> | 14-3-3 protein 2                 |
| <b>156</b> | 0.0563  | 4.78/33 | 5.02/30.9 | [53]  | 225458231 | <i>V. vinifera</i>     | proteasome subunit alpha         |
| <b>157</b> | 0.0338  | 4.89/31 | 5.69/32.6 | [80]  | 211906514 | <i>G. hirsutum</i>     | lactoylglutathione lyase         |
| <b>158</b> | 0.186   | 5.02/33 | 5.5/33.2  | 80    | 359483362 | <i>V. vinifera</i>     | lactoylglutathione lyase         |
| <b>159</b> | 0.0491  | 5.12/37 | 5.08/53.7 | 80    | 340033945 | <i>C. maritimum</i>    | ATP synthase CF1 beta subunit    |
| <b>160</b> | 0.0565  | 5.15/36 | 5.41/49.2 | 84    | 4388534   | <i>S. bicolor</i>      | F1-ATP synthase, beta subunit    |
| <b>161</b> | 0.0209  | 5.13/30 | 5.64/27.4 | [136] | 147805616 | <i>V. vinifera</i>     | hypothetical protein             |
| <b>162</b> | 0.0607  | 5.06/36 | 8.89/54.7 | 83    | 326492265 | <i>Ho. Vulgare</i>     | predicted protein                |
| <b>163</b> | 0.06679 | 4.89/46 | 4.99/54.4 | [343] | 225459744 | <i>V. vinifera</i>     | V-type proton ATPase subunit B   |
| <b>164</b> | 0.0157  | 5.08/46 | 5.04/54.4 | [377] | 225428086 | <i>V. vinifera</i>     | V-type proton ATPase subunit B 1 |
| <b>165</b> | 0.116   | 4.78/42 | 5.28/47.1 | [59]  | 224071449 | <i>P. trichocarpa</i>  | phospholipase A                  |
| <b>166</b> | 0.0203  | 4.81/16 | 5.91/13.4 | 81    | 116789736 | <i>P. sitchensis</i>   | unknown                          |
| <b>167</b> | 0.0414  | 5.35/17 | 5.98/51.0 | [51]  | 115392253 | <i>C. betuloides</i>   | polyphenol oxidase               |
| <b>168</b> | 0.0691  | 5.36/19 | 5.39/18.0 | [210] | 225430941 | <i>V. vinifera</i>     | regulator of ribonuclease        |
| <b>169</b> | 0.179   | 5.23/16 | 5.64/20.9 | [152] | 2832430   | <i>H. brasiliensis</i> | prohevein                        |
| <b>170</b> | 0.14    | 5.18/15 | 5.92/16.2 | [110] | 298362843 | <i>H. brasiliensis</i> | actin-depolymerizing factor      |
| <b>171</b> | 0.477   | 4.81/19 | 9.23/58.4 | [104] | 255539441 | <i>R. communis</i>     | actin depolymerizing factor      |
| <b>172</b> | 0.125   | 5.18/18 | 5.64/20.9 | [252] | 2832430   | <i>H. brasiliensis</i> | prohevein                        |
| <b>173</b> | 0.0849  | 5.12/23 | 5.17/24.9 | 101   | 255574159 | <i>R. communis</i>     | proteasome subunit beta type     |

|     |        |         |            |        |           |                          |                                           |
|-----|--------|---------|------------|--------|-----------|--------------------------|-------------------------------------------|
| 174 | 0.0317 | 4.89/31 | 5.93/34.3  | [117]  | 242059605 | <i>S. bicolor</i>        | hypothetical protein                      |
| 175 | 0.0295 | 5.22/27 | 6.44/66.4  | 86     | 2832654   | <i>A. thaliana</i>       | chloroplast protein cs/ch-42              |
| 176 | 0.0419 | 5.38/26 | 5.78/27.5  | [487]  | 27449248  | <i>H. brasiliensis</i>   | ascorbate peroxidase                      |
| 177 | 0.0415 | 5.32/24 | 6.06/22.6  | [369]  | 357480975 | <i>M. truncatula</i>     | Proteasome subunit beta type              |
| 178 | 0.054  | 5.35/25 | 6.08/24.9  | [302]  | 255541320 | <i>R. communis</i>       | proteasome subunit beta type              |
| 179 | 0.19   | 6.98/15 | 6.56/9.7   | 82     | 350537255 | <i>S. lycopersicum</i>   | small zinc finger-like protein            |
| 180 | 0.0431 | 5.56/27 | 8.99/18.9  | 107    | 37622210  | <i>H. brasiliensis</i>   | small rubber particle protein             |
| 181 | 0.0442 | 5.87/38 | 5.8/61.3   | 81     | 168038495 | <i>P. patens</i>         | predicted protein                         |
| 182 | 0.18   | 6.35/33 | 6.04/61.4  | 82     | 164472662 | <i>T. aestivum</i>       | calcium-dependent protein kinase          |
| 183 | 0.145  | 5.86/45 | 5.68/51.9  | 92     | 32527831  | <i>P. tremula</i>        | UDP-glucose pyrophosphorylase             |
| 184 | 0.0292 | 5.91/45 | 6.04/51.8  | 92     | 356576773 | <i>G. max</i>            | seryl-tRNA synthetase-like                |
| 185 | 0.0442 | 5.48/34 | 8.64/36.3  | [51]   | 357514973 | <i>M. truncatula</i>     | Annexin D4                                |
| 186 | 0.0553 | 5.35/38 | 6.48/42.1  | [63]   | 1351887   | <i>M. domestica</i>      | Alcohol dehydrogenase                     |
| 187 | 0.0362 | 5.51/37 | 5.54/41.0  | [123]  | 380468126 | <i>H. brasiliensis</i>   | caffeic acid 3-O-methyltransferase        |
| 188 | 0.0275 | 5.28/36 | 5.54/41.0  | [117]  | 380468126 | <i>H. brasiliensis</i>   | caffeic acid 3-O-methyltransferase        |
| 189 | 0.069  | 5.11/26 | 5.41/27.5  | [159]  | 284433794 | <i>J. curcas</i>         | glutathione S-transferase omega           |
| 190 | 0.0311 | 5.56/28 | 6.09/30.8  | [52]   | 255567721 | <i>R. communis</i>       | carboxymethylenebutenolidase              |
| 191 | 0.0405 | 5.48/29 | 10.36/29.7 | [59]   | 125573095 | <i>O. sativa</i>         | hypothetical protein OsJ_04535            |
| 192 | 0.0954 | 5.44/33 | 5.5/34.4   | 82     | 255542380 | <i>R. communis</i>       | cysteine synthase, putative               |
| 193 | 0.0329 | 5.23/32 | 5.56/32.4  | [57]   | 255562276 | <i>R. communis</i>       | pyridoxine kinase, putative               |
| 194 | 0.0813 | 5.85/33 | 6.5/32.1   | [303]  | 255552291 | <i>R. communis</i>       | short chain dehydrogenase                 |
| 195 | 0.0796 | 5.17/54 | 5.27/72.0  | 102    | 255543357 | <i>R. communis</i>       | heat shock protein, putative              |
| 196 | 0.0398 | 5.07/53 | 7.9/68.9   | 82     | 224139936 | <i>P. trichocarpa</i>    | predicted protein                         |
| 197 | 0.0121 | 5.09/72 | 5.18/90.5  | 174    | 351727028 | <i>G. max</i>            | cell division cycle protein 48 homolog    |
| 198 | 0.0331 | 5.25/48 | 5.01/46.4  | 180    | 4235430   | <i>H. brasiliensis</i>   | latex-abundant protein                    |
| 199 | 0.0648 | 5.51/47 | 4.96/48.7  | [57]   | 198400319 | <i>Camellia sinensis</i> | senescence-related protein                |
| 200 | 0.0702 | 5.15/40 | 5.6/42.4   | [282]  | 255570457 | <i>R. communis</i>       | protease C56, putative                    |
| 201 | 0.0708 | 5.46/41 | 5.44/41.9  | 149    | 32186896  | <i>G. hirsutum</i>       | actin                                     |
| 202 | 0.0756 | 5.41/42 | 5.49/47.1  | 109    | 255560725 | <i>R. communis</i>       | dead box ATP-dependent RNA helicase       |
| 203 | 0.0199 | 5.35/48 | 5.57/48.0  | [229]  | 14423688  | <i>H. brasiliensis</i>   | Enolase 1                                 |
| 204 | 0.0168 | 5.38/55 | 5.27/72.0  | [311]  | 186898205 | <i>H. brasiliensis</i>   | heat-shock protein 70                     |
| 205 | 0.0392 | 5.68/58 | 5.6/65.4   | [63]   | 255537027 | <i>R. communis</i>       | HSP70-interacting protein                 |
| 206 | 0.0262 | 6.32/51 | 8.96/65.0  | 81     | 302853426 | <i>V. carteri</i>        | hypothetical protein                      |
| 207 | 0.0208 | 6.14/67 | 5.6/65.4   | [266]  | 255537027 | <i>R. communis</i>       | HSP70-interacting protein                 |
| 208 | 0.0133 | 6.35/67 | 5.6/65.4   | [68]   | 255537027 | <i>R. communis</i>       | HSP70-interacting protein                 |
| 209 | 0.0489 | 5.36/57 | 5.52/61.0  | [161]  | 1346735   | <i>R. communis</i>       | phosphoglycerate mutase                   |
| 210 | 0.0132 | 5.38/68 | 5.6/65.4   | [69]   | 255537027 | <i>R. communis</i>       | HSP70-interacting protein                 |
| 211 | 0.0415 | 5.35/72 | 5.13/90.4  | [1185] | 255556934 | <i>R. communis</i>       | Transitional endoplasmic reticulum ATPase |
| 212 | 0.0352 | 5.36/53 | 5.79/66.6  | [166]  | 4588474   | <i>B. napus</i>          | phosphoinositide-specific phospholipase C |
| 213 | 0.0419 | 5.38/55 | 5.79/66.6  | [116]  | 4588474   | <i>B. napus</i>          | phosphoinositide-specific phospholipase C |
| 214 | 0.0365 | 5.33/52 | 5.46/63.7  | [138]  | 255568794 | <i>R. communis</i>       | nucleoredoxin, putative                   |
| 215 | 0.0159 | 5.37/51 | 5.66/53.8  | [289]  | 32967699  | <i>A. thaliana</i>       | S-adenosyl-L-homocystein hydrolase        |
| 216 | 0.0354 | 5.61/49 | 5.69/52.8  | [327]  | 336390551 | <i>G. max</i>            | adenosylhomocysteinase                    |

|            |        |         |           |       |           |                        |                                         |
|------------|--------|---------|-----------|-------|-----------|------------------------|-----------------------------------------|
| <b>217</b> | 0.0327 | 5.78/48 | 5.2/51.8  | [52]  | 6136111   | <i>H. vulgare</i>      | glucose-1-phosphate uridylyltransferase |
| <b>218</b> | 0.0876 | 6.28/38 | 6.86/51.8 | [802] | 14916100  | <i>H. brasiliensis</i> | hydroxymethylglutaryl Co-A synthase     |
| <b>219</b> | 0.0746 | 5.65/34 | 5.92/34.8 | [181] | 307707110 | <i>P. armeniaca</i>    | NAD-dependent malate dehydrogenase      |
| <b>220</b> | 0.091  | 5.54/38 | 5.64/42.2 | [357] | 357137038 | <i>B. distachyon</i>   | phosphoglycerate kinase, cytosolic-like |
| <b>221</b> | 0.031  | 5.25/34 | 8.64/36.3 | [99]  | 357514973 | <i>M. truncatula</i>   | Annexin D4                              |
| <b>222</b> | 0.0629 | 5.41/37 | 5.49/42.2 | [314] | 21536853  | <i>A. thaliana</i>     | phosphoglycerate kinase, putative       |
| <b>223</b> | 0.0416 | 5.68/39 | 5.82/41.6 | [77]  | 255547137 | <i>R. communis</i>     | Alpha-1,4-glucan-protein synthase       |
| <b>224</b> | 0.0396 | 5.29/37 | 5.54/41.0 | [922] | 380468126 | <i>H. brasiliensis</i> | caffeic acid 3-O-methyltransferase      |
| <b>225</b> | 0.0375 | 5.25/39 | 5.6/42.4  | [237] | 255570457 | <i>R. communis</i>     | protease C56, putative                  |
| <b>226</b> | 0.0626 | 5.13/27 | 5.24/26.2 | [172] | 224131618 | <i>P. trichocarpa</i>  | predicted protein                       |
| <b>227</b> | 0.166  | 5.31/25 | 5.48/25.6 | [386] | 333690873 | <i>H. brasiliensis</i> | glutathione-S-transferase tau 1         |
| <b>228</b> | 0.0928 | 5.38/26 | 6.0/27.5  | [243] | 211906460 | <i>G. hirsutum</i>     | triosephosphate isomerase               |
| <b>229</b> | 0.0256 | 5.21/27 | 5.13/27.5 | [93]  | 255568460 | <i>R. communis</i>     | glutathione-s-transferase omega         |
| <b>230</b> | 0.0459 | 5.15/25 | 5.62/25.8 | [104] | 2970051   | <i>V. radiata</i>      | ARG10                                   |
| <b>231</b> | 0.0957 | 5.23/21 | 5.64/20.9 | [217] | 2832430   | <i>H. brasiliensis</i> | prohevein                               |
| <b>232</b> | 0.136  | 5.35/20 | 5.64/20.9 | [112] | 2832430   | <i>H. brasiliensis</i> | prohevein                               |
| <b>233</b> | 0.0722 | 4.98/23 | 4.8/22.3  | [384] | 14423933  | <i>H. brasiliensis</i> | Small rubber particle protein           |
| <b>234</b> | 0.185  | 5.01/15 | 5.04/14.7 | [379] | 132270    | <i>H. brasiliensis</i> | Rubber elongation factor protein        |
| <b>235</b> | 0.0425 | 5.56/15 | 6.32/17.1 | [128] | 123550    | <i>P. sativum</i>      | heat shock protein, 17.1 kDa class II   |
| <b>236</b> | 0.212  | 5.36/14 | 5.96/16.5 | [272] | 312985293 | <i>H. brasiliensis</i> | nucleoside diphosphate kinase 2         |
| <b>237</b> | 0.234  | 5.67/13 | 5.04/14.7 | [90]  | 132270    | <i>H. brasiliensis</i> | Rubber elongation factor protein        |
| <b>238</b> | 1.121  | 5.54/13 | 5.64/20.9 | [344] | 2832430   | <i>H. brasiliensis</i> | prohevein                               |
| <b>239</b> | 0.0902 | 5.01/41 | 5.6/42.4  | [193] | 255570457 | <i>R. communis</i>     | protease C56, putative                  |
| <b>240</b> | 0.0535 | 5.58/46 | 5.68/47.0 | [58]  | 727357    | <i>A. thaliana</i>     | DnaJ homolog                            |
| <b>241</b> | 0.0674 | 5.34/48 | 5.46/63.7 | [100] | 255568794 | <i>R. communis</i>     | nucleoredoxin, putative                 |
| <b>242</b> | 1.13   | 4.75/51 | 4.6/41.5  | 93    | 37719658  | <i>H. brasiliensis</i> | 50 kDa protein                          |
| <b>243</b> | 0.354  | 4.78/49 | 4.6/41.5  | 85    | 37719658  | <i>H. brasiliensis</i> | 50 kDa protein                          |
| <b>244</b> | 1.05   | 4.55/50 | 4.6/41.5  | 95    | 37719658  | <i>H. brasiliensis</i> | 50 kDa protein                          |
| <b>245</b> | 1.02   | 4.73/47 | 4.6/41.5  | 101   | 37719658  | <i>H. brasiliensis</i> | 50 kDa protein                          |
| <b>246</b> | 0.121  | 4.77/47 | 4.6/41.5  | 118   | 37719658  | <i>H. brasiliensis</i> | 50 kDa protein                          |
| <b>247</b> | 0.215  | 5.35/13 | 5.63/22.7 | [158] | 123062    | <i>H. brasiliensis</i> | Pro-hevein                              |
| <b>248</b> | 1.41   | 6.96/13 | 5.64/20.9 | [446] | 2832430   | <i>H. brasiliensis</i> | prohevein                               |
| <b>249</b> | 0.428  | 5.01/13 | 5.04/14.7 | [405] | 132270    | <i>H. brasiliensis</i> | Rubber elongation factor protein        |
| <b>250</b> | 0.478  | 5.24/13 | 5.04/14.7 | [340] | 132270    | <i>H. brasiliensis</i> | Rubber elongation factor protein        |
| <b>251</b> | 0.401  | 5.11/13 | 5.04/14.7 | [470] | 132270    | <i>H. brasiliensis</i> | Rubber elongation factor protein        |
| <b>252</b> | 0.788  | 5.69/14 | 5.04/14.7 | [402] | 132270    | <i>H. brasiliensis</i> | Rubber elongation factor protein        |
| <b>B1</b>  | ---    | ---     | 5.04/14.7 | [282] | 132270    | <i>H. brasiliensis</i> | Rubber elongation factor protein        |
| <b>B2</b>  | ---    | ---     | 5.14/90.3 | 90    | 225440045 | <i>V. vinifera</i>     | cell division cycle protein 48 homolog  |
| <b>B3</b>  | ---    | ---     | 5.54/92.3 | [100] | 88193697  | <i>A. hypogaea</i>     | phospholipase D                         |
| <b>B4</b>  | ---    | ---     | 5.17/71.4 | 102   | 225440324 | <i>V. vinifera</i>     | heat shock cognate 70 protein           |
| <b>B5</b>  | ---    | ---     | 6.77/23.7 | 95    | 253760141 | <i>S. bicolor</i>      | hypothetical protein                    |
| <b>B6</b>  | ---    | ---     | 4.8/22.3  | [348] | 14423933  | <i>H. brasiliensis</i> | Small rubber particle protein           |
| <b>B7</b>  | ---    | ---     | 9.4/41.5  | 125   | 124365253 | <i>H. brasiliensis</i> | beta-1,3-glucanase                      |

|            |     |     |           |       |           |                        |                                          |
|------------|-----|-----|-----------|-------|-----------|------------------------|------------------------------------------|
| <b>B8</b>  | --- | --- | 9.46/35.3 | 187   | 124365253 | <i>H. brasiliensis</i> | beta-1,3-glucanase                       |
| <b>B9</b>  | --- | --- | 7.1/36.9  | 103   | 255540341 | <i>R. communis</i>     | glyceraldehyde 3-phosphate dehydrogenase |
| <b>B10</b> | --- | --- | 4.8/22.3  | 160   | 14423933  | <i>H. brasiliensis</i> | small rubber particle protein            |
| <b>B11</b> | --- | --- | 5.06/19.6 | 106   | 38122474  | <i>H. brasiliensis</i> | rubber elongation factor                 |
| <b>B12</b> | --- | --- | 5.0/43.0  | 87    | 3288200   | <i>H. brasiliensis</i> | latex allergen                           |
| <b>B13</b> | --- | --- | 5.04/14.9 | [271] | 334854628 | <i>H. brasiliensis</i> | rubber elongation factor                 |
| <b>B14</b> | --- | --- | 5.57/48.0 | 117   | 14423688  | <i>H. brasiliensis</i> | Enolase 1                                |
| <b>B15</b> | --- | --- | 5.27/72.0 | 85    | 255543357 | <i>R. communis</i>     | heat shock protein, putative             |
| <b>B16</b> | --- | --- | 5.12/91.0 | 88    | 225456951 | <i>V. vinifera</i>     | cell division cycle protein 48 homolog   |
| <b>B17</b> | --- | --- | 5.22/21.0 | [67]  | 66735596  | <i>A. hypogaea</i>     | phospholipase D alpha                    |
| <b>B18</b> | --- | --- | 5.02/80.4 | 90    | 33326375  | <i>H. brasiliensis</i> | heat shock protein                       |
| <b>B19</b> | --- | --- | 5.11/70.4 | 107   | 450880    | <i>A. thaliana</i>     | heat shock cognate 70-1                  |
| <b>B20</b> | --- | --- | 7.01/28.4 | 81    | 379068234 | <i>R. formosanum</i>   | leucine-rich repeat protein              |
| <b>B21</b> | --- | --- | 5.57/48.0 | 101   | 14423688  | <i>H. brasiliensis</i> | enolase 1                                |
| <b>B22</b> | --- | --- | 5.0/43.0  | 121   | 3288200   | <i>H. brasiliensis</i> | latex allergen                           |
| <b>B23</b> | --- | --- | 5.64/42.2 | [81]  | 113217    | <i>Daucus carota</i>   | Actin-1                                  |
| <b>B24</b> | --- | --- | 97.2/6.1  | 84    | 147835357 | <i>V. vinifera</i>     | hypothetical protein                     |
| <b>B25</b> | --- | --- | 5.67/11.7 | 81    | 170525118 | <i>P. mendocina</i>    | geranylgeranyl reductase                 |
| <b>B26</b> | --- | --- | 8.11/43.2 | 83    | 145346735 | <i>O. lucimarinus</i>  | predicted protein                        |
| <b>B27</b> | --- | --- | 4.79/29.0 | [101] | 37903393  | <i>S. hybrid</i>       | 14-3-3-like protein                      |
| <b>B28</b> | --- | --- | 9.46/35.5 | 181   | 10946499  | <i>H. brasiliensis</i> | beta-1,3-glucanase                       |
| <b>B29</b> | --- | --- | 9.4/41.5  | 105   | 124365253 | <i>H. brasiliensis</i> | beta-1,3-glucanase                       |
| <b>B30</b> | --- | --- | 4.8/22.3  | 130   | 14423933  | <i>H. brasiliensis</i> | small rubber particle protein            |
| <b>B31</b> | --- | --- | 7.77/20.7 | 132   | 313586569 | <i>H. brasiliensis</i> | hypothetical protein 19                  |
| <b>B32</b> | --- | --- | 6.56/8.5  | 162   | 327492451 | <i>M. crystallinum</i> | N-terminal end of polyubiquitin          |
| <b>B33</b> | --- | --- | 5.73.15.7 | 87    | 27449246  | <i>H. brasiliensis</i> | Cu/Zn superoxide dismutase SOD           |
| <b>B34</b> | --- | --- | 4.61/12.8 | 84    | 29170601  | <i>H. brasiliensis</i> | small rubber particle protein            |
| <b>B35</b> | --- | --- | 5.01/10.3 | [118] | 242080683 | <i>S. bicolor</i>      | hypothetical protein                     |

**Note:**

<sup>a</sup>Assigned spot (S1-S252) or band (B1-B35) number as indicated in Fig. 2.

<sup>b</sup>The statistical percent of volue value (Vol%) of the target protein spot in all the proteins in the 2-DE gels produced by ImageMaster.

<sup>c, d</sup>The experimental (c) and theoretical (d) values for the mass (kDa) and *pI* of identified proteins. The theoretical values were retrieved from the protein database, and the experimental values were produced by ImageMaster.

<sup>e</sup>Mascot searched scores (M.S.) against NCBIInr for the MS and [MS/MS] searched results.

<sup>f</sup>Database accession (gi|) numbers according to NCBIInr. ---, the values were not detected.



**Supplementary Table S2** MS identification of the differential latex proteins in DIGE gels

| <b>Spot NO.<sup>a</sup></b> | <b>Changed<sup>b</sup><br/>3   5-day</b> | <b>Exper.<sup>c</sup><br/>pI/Mr</b> | <b>Thero.<sup>d</sup><br/>pI/Mr</b> | <b>M.S.<sup>e</sup><br/>Score</b> | <b>NCBI<br/>No.<sup>f</sup></b> | <b>Plant<br/>species</b> | <b>Protein<br/>name</b>                   |
|-----------------------------|------------------------------------------|-------------------------------------|-------------------------------------|-----------------------------------|---------------------------------|--------------------------|-------------------------------------------|
| <b>D1</b>                   | -1.23/-1.85                              | 5.19/30                             | 4.71/28.6                           | [278]                             | 255545912                       | <i>R. communis</i>       | 14-3-3 protein, putative                  |
| <b>D2</b>                   | -1.47/-1.97                              | 4.75/51                             | 4.6/41.5                            | 93                                | 37719658                        | <i>H. brasiliensis</i>   | 50 kDa protein                            |
| <b>D3</b>                   | -1.51/-2.09                              | 4.78/49                             | 4.6/41.5                            | 85                                | 37719658                        | <i>H. brasiliensis</i>   | 50 kDa protein                            |
| <b>D4</b>                   | -1.24/-4.02                              | 5.87/62                             | 5.64/27.4                           | [324]                             | 147805616                       | <i>V. vinifera</i>       | hypothetical protein VITISV_028800        |
| <b>D5</b>                   | -1.24/-1.68                              | 6.33/68                             | 5.3/35.8                            | [122]                             | 224137430                       | <i>P. trichocarpa</i>    | predicted protein                         |
| <b>D6</b>                   | 1.31/1.59                                | 5.16/47                             | 5.57/48.0                           | [229]                             | 14423688                        | <i>H. brasiliensis</i>   | Enolase 1                                 |
| <b>D7</b>                   | -1.52/-2.74                              | 4.55/50                             | 4.6/41.5                            | 95                                | 37719658                        | <i>H. brasiliensis</i>   | 50 kDa protein                            |
| <b>D8</b>                   | 1.11/1.54                                | 5.45/61                             | 5.87/95.0                           | 123                               | 255565836                       | <i>R. communis</i>       | eukaryotic translation elongation factor  |
| <b>D9</b>                   | 1.52/1.34                                | 4.93/41                             | 5.047/54.4                          | 146                               | 225428086                       | <i>V. vinifera</i>       | V-type proton ATPase subunit B 1          |
| <b>D10</b>                  | -1.27/-1.57                              | 6.42/16                             | 5.65/20.9                           | [446]                             | 2832430                         | <i>H. brasiliensis</i>   | Pro-hevein                                |
| <b>D11</b>                  | -1.23/-1.54                              | 6.61/15                             | 5.63/22.7                           | [158]                             | 123062                          | <i>H. brasiliensis</i>   | Pro-hevein                                |
| <b>D12</b>                  | -1.52/1.31                               | 5.87/71                             | 5.42/45.9                           | [77]                              | 15237159                        | <i>A. thaliana</i>       | regulatory particle triple-A ATPase 3     |
| <b>D13</b>                  | -1.53/1.19                               | 6.0/21                              | 5.63/22.7                           | [129]                             | 123062                          | <i>H. brasiliensis</i>   | Pro-hevein                                |
| <b>D14</b>                  | -1.09/1.56                               | 5.94/54                             | 5.75/35.6                           | [196]                             | 225446010                       | <i>V. vinifera</i>       | glucose-6-phosphate 1-epimerase           |
| <b>D15</b>                  | 1.51/-1.53                               | 5.25/97                             | 5.15/75.5                           | [338]                             | 1143427                         | <i>C. sativus</i>        | heat shock protein 70                     |
| <b>D16</b>                  | -1.43/-1.87                              | 6.23/48                             | 4.94/28.6                           | [198]                             | 255558037                       | <i>R. communis</i>       | nucleic acid binding protein, putative    |
| <b>D17</b>                  | -1.27/-1.52                              | 6.35/18                             | 5.73/15.7                           | [105]                             | 27449246                        | <i>H. brasiliensis</i>   | Cu/Zn superoxide dismutase                |
| <b>D18</b>                  | -1.07/-1.55                              | 6.96/14                             | 5.64/20.9                           | [446]                             | 2832430                         | <i>H. brasiliensis</i>   | pro-hevein                                |
| <b>D19</b>                  | -1.57/-1.53                              | 6.6/99                              | 6.08/59.6                           | [301]                             | 255551408                       | <i>R. communis</i>       | chaperonin containing t-complex protein 1 |
| <b>D20</b>                  | -1.51/-1.82                              | 6.02/55                             | 6.18/35.6                           | [75]                              | 225438145                       | <i>V. vinifera</i>       | malate dehydrogenase, cytoplasmic         |
| <b>D21</b>                  | 1.75/-1.98                               | 5.6/43                              | 5.19/56.6                           | [116]                             | 224056377                       | <i>R. communis</i>       | Aspartic proteinase precursor, putative   |
| <b>D22</b>                  | 1.15/-1.55                               | 5.59/54                             | 7.63/31.6                           | [145]                             | 255554865                       | <i>R. communis</i>       | lactoylglutathione lyase, putative        |
| <b>D23</b>                  | -1.95/1.55                               | 6.23/64                             | 5.83/27.7                           | [466]                             | 356517215                       | <i>G. max</i>            | uncharacterized protein LOC100817735      |
| <b>D24</b>                  | 1.52/1.14                                | 5.55/98                             | 5.1/71.2                            | [505]                             | 356569000                       | <i>G. max</i>            | heat shock cognate 70 kDa protein         |
| <b>D25</b>                  | 1.54/1.52                                | 5.01/13                             | 5.04/14.7                           | [405]                             | 132270                          | <i>H. brasiliensis</i>   | Rubber elongation factor protein          |
| <b>D26</b>                  | 1.51/-1.11                               | 6.53/42                             | 7.81/31.3                           | [79]                              | 6624721                         | <i>P. sativum</i>        | cysteine protease, putative               |
| <b>D27</b>                  | 1.55/-1.1                                | 5.24/13                             | 5.04/14.7                           | [340]                             | 132270                          | <i>H. brasiliensis</i>   | Rubber elongation factor protein          |
| <b>D28</b>                  | 3.01/1.06                                | 5.96/87                             | 5.47/46.2                           | [115]                             | 314991144                       | <i>G. hirsutum</i>       | mitogen-activated protein kinase          |
| <b>D29</b>                  | -2.92/1.05                               | 6.01/33                             | 5.59/18.4                           | [82]                              | 118485535                       | <i>P. trichocarpa</i>    | unknown                                   |
| <b>D30</b>                  | 1.26/1.54                                | 5.11/13                             | 5.04/14.7                           | [470]                             | 132270                          | <i>H. brasiliensis</i>   | Rubber elongation factor protein          |
| <b>D31</b>                  | 1.58/-1.15                               | 6.61/41                             | 6.43/36.7                           | [80]                              | 470127750                       | <i>F. vesca</i>          | uncharacterized protein LOC101300446      |
| <b>D32</b>                  | 1.53/1.19                                | 5.69/14                             | 5.04/14.7                           | [398]                             | 132270                          | <i>H. brasiliensis</i>   | Rubber elongation factor protein          |
| <b>D33</b>                  | 1.67/1.21                                | 6.37/102                            | 5.31/47.9                           | [106]                             | 351724891                       | <i>G. max</i>            | enolase                                   |
| <b>D34</b>                  | 1.56/1.32                                | 5.27/68                             | 4.65/41.4                           | [154]                             | 255578278                       | <i>R. communis</i>       | hypothetical protein RCOM_0537780         |
| <b>D35</b>                  | 1.53/1.19                                | 6.63/41                             | 5.15/75.5                           | [378]                             | 1143427                         | <i>C. sativus</i>        | heat shock protein 70                     |
| <b>D36</b>                  | 1.55/1.54                                | 6.54/82                             | 6.96/41.2                           | [120]                             | 164604960                       | <i>H. brasiliensis</i>   | acetyl-CoA C-acetyltransferase            |
| <b>D37</b>                  | -1.58/-1.53                              | 6.54/41                             | 8.99/18.9                           | [77]                              | 37622210                        | <i>H. brasiliensis</i>   | small rubber particle protein             |
| <b>D38</b>                  | -1.49/1.52                               | 5.24/35                             | 4.87/30.8                           | [109]                             | 255555641                       | <i>R. communis</i>       | 26S proteasome atpase regulatory subunit  |
| <b>D39</b>                  | -1.59/-2.53                              | 6.32/31                             | 6.08/24.9                           | [157]                             | 255541320                       | <i>R. communis</i>       | proteasome subunit beta type              |
| <b>D40</b>                  | -1.55/-1.95                              | 5.21/97                             | 5.35/75.4                           | [459]                             | 255570990                       | <i>R. communis</i>       | heat shock protein, putative              |
| <b>D41</b>                  | -1.26/-1.55                              | 6.53/24                             | 5.86/22.7                           | [97]                              | 351726646                       | <i>G. max</i>            | uncharacterized protein                   |

|            |             |         |           |       |           |                        |                                            |
|------------|-------------|---------|-----------|-------|-----------|------------------------|--------------------------------------------|
| <b>D42</b> | 1.51/1.87   | 5.49/72 | 4.98/54.8 | [111] | 166627    | <i>A. thaliana</i>     | nucleotide-binding subunit of V-ATPase     |
| <b>D43</b> | -1.51/-1.53 | 6.21/14 | 5.04/14.7 | [55]  | 132270    | <i>H. brasiliensis</i> | Rubber elongation factor protein           |
| <b>D44</b> | 1.53/-1.39  | 6.71/34 | 5.84/27.5 | [366] | 255583952 | <i>R. communis</i>     | proteasome subunit alpha type, putative    |
| <b>D45</b> | -1.21/-1.58 | 5.97/28 | 5.48/26.3 | [189] | 356547978 | <i>G. max</i>          | eukaryotic translation initiation factor 3 |
| <b>D46</b> | -1.17/-1.56 | 6.51/31 | 6.4/23.7  | [78]  | 310772392 | <i>M. glabra</i>       | dehydroascorbate reductase                 |
| <b>D47</b> | 1.63/-1.29  | 5.54/19 | 5.39/17.9 | [370] | 255547584 | <i>R. communis</i>     | Regulator of ribonuclease activity A       |
| <b>D48</b> | 1.24/-1.55  | 6.72/85 | 6.29/35.5 | [128] | 255568992 | <i>R. communis</i>     | conserved hypothetical protein             |
| <b>D49</b> | -1.52/-1.54 | 6.24/91 | 5.78/54.6 | [206] | 356522666 | <i>G. max</i>          | ubiquitin carboxyl-terminal hydrolase 6    |
| <b>D50</b> | 1.54/-1.23  | 5.51/47 | 5.84/27.4 | [120] | 224099853 | <i>P. trichocarpa</i>  | predicted protein                          |
| <b>D51</b> | -1.12/1.58  | 6.13/90 | 5.46/63.7 | [380] | 255568794 | <i>R. communis</i>     | nucleoredoxin, putative                    |
| <b>D52</b> | 1.53/1.58   | 5.51/31 | 4.8/22.3  | [137] | 14423933  | <i>H. brasiliensis</i> | Small rubber particle protein              |
| <b>D53</b> | -1.01/1.53  | 5.9/45  | 5.48/25.6 | [132] | 333690873 | <i>H. brasiliensis</i> | glutathione-S-transferase tau 1            |
| <b>D54</b> | -1.27/1.55  | 6.01/62 | 5.71/38.4 | [105] | 356543702 | <i>G. max</i>          | pulegone reductase-like                    |
| <b>D55</b> | 1.21/1.52   | 6.4/20  | 5.82/18.5 | [56]  | 351721881 | <i>G. max</i>          | heat shock protein,18.5 kDa class I        |
| <b>D56</b> | -1.09/1.56  | 5.61/96 | 5.02/48.4 | [96]  | 462406561 | <i>P. persica</i>      | hypothetical protein                       |
| <b>D57</b> | 1.12/1.59   | 6.64/35 | 7.6/30.6  | [56]  | 255570177 | <i>R. communis</i>     | proteasome subunit beta type               |
| <b>D58</b> | 1.13/-1.54  | 6.75/16 | 5.93/18.3 | [197] | 3834310   | <i>A. thaliana</i>     | Ubiquitin-conjugating enzyme               |
| <b>D59</b> | 1.02/1.56   | 6.7/18  | 6.2/16.7  | [256] | 315937232 | <i>J. curcas</i>       | ubiquitin-conjugating family protein       |
| <b>D60</b> | 1.27/1.52   | 5.53/72 | 5.07/54.1 | [271] | 226531470 | <i>Z. mays</i>         | vacuolar ATP synthase subunit B            |
| <b>D61</b> | -1.78/-2.65 | 6.34/22 | 5.64/20.9 | [175] | 2832430   | <i>H. brasiliensis</i> | pro-hevein                                 |
| <b>D62</b> | 1.61/1.31   | 6.32/56 | 5.54/40.1 | [195] | 114199044 | <i>M. domestica</i>    | caffeic acid O-methyltransferase           |
| <b>D63</b> | 1.12/1.57   | 5.74/29 | 8.33/27.7 | [77]  | 255538084 | <i>R. communis</i>     | Adenine phosphoribosyltransferase          |
| <b>D64</b> | 1.52/1.51   | 5.79/35 | 5.55/26.0 | [94]  | 255546213 | <i>R. communis</i>     | o-methyltransferase, putative              |
| <b>D65</b> | 1.53/1.52   | 4.88/13 | 5.04/14.7 | 95    | 132270    | <i>H. brasiliensis</i> | Rubber elongation factor protein           |
| <b>D66</b> | 1.57/1.51   | 4.9/23  | 4.8/22.3  | 122   | 14423933  | <i>H. brasiliensis</i> | Small rubber particle protein              |
| <b>D67</b> | 1.56/1.53   | 4.82/23 | 4.8/22.3  | 135   | 14423933  | <i>H. brasiliensis</i> | Small rubber particle protein              |
| <b>D68</b> | 1.54/1.51   | 4.88/26 | 4.79/29.5 | 93    | 388503664 | <i>L. japonicus</i>    | unknown                                    |
| <b>D69</b> | 1.57/1.14   | 5.05/49 | 5.01/46.6 | 96    | 4235430   | <i>H. brasiliensis</i> | latex-abundant protein                     |
| <b>D70</b> | 1.03/-1.52  | 5.18/15 | 8.01/11.2 | [86]  | 30575570  | <i>C. paradisi</i>     | HSP19 class II, partial                    |
| <b>D71</b> | -1.54/-1.7  | 5.61/15 | 8.29/35.1 | [60]  | 37806305  | <i>O. sativa</i>       | hypothetical protein                       |
| <b>D72</b> | -1.55/-1.56 | 5.69/27 | 8.72/34.1 | [56]  | 3451147   | <i>H. brasiliensis</i> | chitinase                                  |
| <b>D73</b> | -1.59/-1.58 | 6.75/33 | 7.1/36.9  | 86    | 255540341 | <i>R. communis</i>     | glyceraldehyde 3-phosphate dehydrogenase   |
| <b>D74</b> | 1.01/-1.55  | 4.95/40 | 5.0/43.0  | [81]  | 3288200   | <i>H. brasiliensis</i> | latex allergen                             |
| <b>D75</b> | -1.22/1.53  | 4.91/39 | 5.0/43.0  | [138] | 1916805   | <i>H. brasiliensis</i> | latex patatin homolog                      |
| <b>D76</b> | -1.11/3.13  | 5.03/40 | 5.12/43.0 | 152   | 41581137  | <i>H. brasiliensis</i> | latex allergen hev b 7.02                  |
| <b>D77</b> | -1.07/2.02  | 5.06/40 | 5.12/43.0 | 142   | 41581137  | <i>H. brasiliensis</i> | latex allergen hev b 7.02                  |
| <b>D78</b> | -1.27/-1.58 | 3.65/33 | 9.45/38.9 | 156   | 4469175   | <i>H. brasiliensis</i> | beta-1,3-glucanase                         |
| <b>D79</b> | -1.17/-1.61 | 5.64/16 | 6.22/34.3 | 84    | 34538473  | <i>H. vulgare</i>      | caleosin 1                                 |
| <b>D80</b> | 1.54/1.16   | 5.03/49 | 5.49/47.1 | 144   | 255560725 | <i>R. communis</i>     | dead box ATP-dependent RNA helicase        |
| <b>D81</b> | 1.52/1.1    | 4.91/46 | 4.65/41.4 | [76]  | 255578278 | <i>R. communis</i>     | hypothetical protein RCOM_0537780          |
| <b>D82</b> | -1.04/1.68  | 5.27/44 | 5.44/50.1 | 83    | 2501850   | <i>N. tabacum</i>      | GDP dissociation inhibitor                 |
| <b>D83</b> | -1.06/-1.52 | 4.9/49  | 4.72/28.9 | [74]  | 3264769   | <i>P. armeniaca</i>    | late embryogenesis-like protein            |
| <b>D84</b> | 1.04/1.55   | 4.98/27 | 5.84/27.4 | [69]  | 224099853 | <i>P. trichocarpa</i>  | predicted protein                          |
| <b>D85</b> | -1.56/-1.03 | 5.17/21 | 5.06/19.6 | [410] | 38122474  | <i>H. brasiliensis</i> | rubber elongation factor                   |

|             |              |         |           |       |           |                        |                                           |
|-------------|--------------|---------|-----------|-------|-----------|------------------------|-------------------------------------------|
| <b>D86</b>  | -1.52/2.18   | 5.21/22 | 5.06/19.6 | [226] | 38122474  | <i>H. brasiliensis</i> | rubber elongation factor                  |
| <b>D87</b>  | 1.53/1.52    | 4.62/19 | 4.06/15.2 | [496] | 334854634 | <i>H. brasiliensis</i> | elicitor-responsive protein               |
| <b>D88</b>  | -1.57/-1.62  | 5.37/16 | 5.39/18.0 | [180] | 224144943 | <i>P. trichocarpa</i>  | predicted protein                         |
| <b>D89</b>  | -1.58/-1.28  | 6.74/16 | 5.63/22.7 | 96    | 123062    | <i>H. brasiliensis</i> | Pro-hevein                                |
| <b>D90</b>  | -1.58/-4     | 5.42/22 | 5.06/19.6 | 99    | 38122474  | <i>H. brasiliensis</i> | rubber elongation factor                  |
| <b>D91</b>  | -1.02/-1.61  | 5.35/26 | 6.17/27.5 | [49]  | 1709761   | <i>S. oleracea</i>     | Proteasome subunit alpha type-4           |
| <b>D92</b>  | -1.58/1.02   | 5.22/22 | 5.06/19.6 | 125   | 38122474  | <i>H. brasiliensis</i> | rubber elongation factor                  |
| <b>D93</b>  | -1.56/-1.52  | 5.75/23 | 8.44/29.9 | 93    | 157831407 | <i>H. brasiliensis</i> | Chain A, Crystal Structures Of Hevamine   |
| <b>D94</b>  | 1.03/-1.58   | 5.52/33 | 5.89/27.9 | [89]  | 3127890   | <i>C. arietinum</i>    | cysteine synthase, O-acetyl-(thiol)-lyase |
| <b>D95</b>  | -1.24/3.05   | 5.05/39 | 5.0/43.9  | [59]  | 51315784  | <i>H. brasiliensis</i> | Esterase                                  |
| <b>D96</b>  | 1.39/5.24    | 5.29/21 | 5.06/19.6 | 98    | 38122474  | <i>H. brasiliensis</i> | rubber elongation factor                  |
| <b>D97</b>  | 1.04/1.52    | 5.02/27 | 7.63/31.6 | [55]  | 255554865 | <i>R. communis</i>     | lactoylglutathione lyase, putative        |
| <b>D98</b>  | 1.58/1.39    | 5.51/26 | 5.93/27.6 | 86    | 15225839  | <i>A. thaliana</i>     | proteasome subunit alpha type-3           |
| <b>D99</b>  | 1.55/1.02    | 4.45/15 | 4.61/12.8 | [97]  | 29170601  | <i>H. brasiliensis</i> | small rubber particle protein             |
| <b>D100</b> | -1.09/-1.63  | 5.46/13 | 5.64/20.9 | [84]  | 2832430   | <i>H. brasiliensis</i> | pro-hevein                                |
| <b>D101</b> | -1.67/-1.16  | 5.55/14 | 6.82/15.0 | [68]  | 224054224 | <i>P. trichocarpa</i>  | predicted protein                         |
| <b>D102</b> | 1.13/1.72    | 5.01/11 | 5.45/11.2 | 81    | 268321205 | <i>H. brasiliensis</i> | latex cystatin                            |
| <b>D103</b> | -1.62/-1.02  | 5.16/15 | 6.4/8.6   | 81    | 242083244 | <i>S. bicolor</i>      | hypothetical protein                      |
| <b>D104</b> | 1.57/1.12    | 4.94/13 | 4.61/12.8 | [85]  | 29170601  | <i>H. brasiliensis</i> | small rubber particle protein             |
| <b>D105</b> | -2.51/-3.62  | 4.13/13 | 4.1/16.9  | [128] | 354318    | <i>T. aestivum</i>     | calmodulin                                |
| <b>D106</b> | -1.51/-8.05  | 4.12/21 | 4.8/22.3  | 85    | 14423933  | <i>H. brasiliensis</i> | Small rubber particle protein             |
| <b>D107</b> | -2.36/1.06   | 4.45/24 | 4.8/22.3  | 165   | 14423933  | <i>H. brasiliensis</i> | Small rubber particle protein             |
| <b>D108</b> | -1.62/-1.1   | 5.36/47 | 5.57/48.0 | 107   | 14423688  | <i>H. brasiliensis</i> | Enolase 1                                 |
| <b>D109</b> | 1.61/1.65    | 5.01/26 | 5.48/25.6 | [52]  | 333690873 | <i>H. brasiliensis</i> | glutathione-S-transferase tau 1           |
| <b>D110</b> | -1.12/-1.57  | 5.09/15 | 5.95/17.6 | [87]  | 140083605 | <i>R. hybrid</i>       | cytosolic class II HSP17.5                |
| <b>D111</b> | -2.32/-11.52 | 4.02/41 | 5.01/14.6 | [88]  | 37901124  | <i>H. brasiliensis</i> | latex abundant protein 1                  |
| <b>D112</b> | -1.27/-1.87  | 4.35/40 | 4.53/38.0 | [173] | 359806300 | <i>G. max</i>          | uncharacterized protein                   |
| <b>D113</b> | -8.92/-8.16  | 4.28/38 | 4.53/38.1 | [166] | 37625031  | <i>V. aestivalis</i>   | ankyrin-repeat protein                    |
| <b>D114</b> | 1.02/-1.7    | 4.39/38 | 4.45/37.5 | [71]  | 13310811  | <i>N. tabacum</i>      | ankyrin-repeat protein HBP1               |
| <b>D115</b> | -1.64/-1.6   | 4.31/36 | 4.5/25.3  | [117] | 378464888 | <i>A. mongolicus</i>   | translation elongation factor             |
| <b>D116</b> | -1.08/-1.94  | 4.83/30 | 5.26/35.7 | [132] | 22261807  | <i>S. tuberosum</i>    | Light-induced protein, chloroplastic      |
| <b>D117</b> | 1.21/1.73    | 5.13/30 | 5.64/27.4 | [136] | 147805616 | <i>V. vinifera</i>     | hypothetical protein VITISV_028800        |
| <b>D118</b> | 1.63/1.17    | 5.08/46 | 5.04/54.4 | [377] | 225428086 | <i>V. vinifera</i>     | V-type proton ATPase subunit B 1          |
| <b>D119</b> | 1.01/1.56    | 4.78/42 | 5.28/47.1 | [59]  | 224071449 | <i>P. trichocarpa</i>  | phospholipase A                           |
| <b>D120</b> | -1.57/1.52   | 4.81/16 | 5.91/13.4 | 81    | 116789736 | <i>P. sitchensis</i>   | unknown                                   |
| <b>D121</b> | -1.12/-1.65  | 5.35/17 | 5.98/51.0 | [51]  | 115392253 | <i>C. betuloides</i>   | polyphenol oxidase                        |
| <b>D122</b> | -1.21/-1.9   | 5.36/19 | 5.39/18.0 | [210] | 225430941 | <i>V. vinifera</i>     | regulator of ribonuclease-like protein 2  |
| <b>D123</b> | -1.81/1.07   | 4.81/19 | 9.23/58.4 | [104] | 255539441 | <i>R. communis</i>     | actin depolymerizing factor, putative     |
| <b>D124</b> | -1.1/2.05    | 5.32/24 | 6.06/22.6 | [369] | 357480975 | <i>M. truncatula</i>   | Proteasome subunit beta type              |
| <b>D125</b> | -1.21/1.65   | 5.51/37 | 5.54/41.0 | [123] | 380468126 | <i>H. brasiliensis</i> | caffeic acid 3-O-methyltransferase        |
| <b>D126</b> | -1.05/1.55   | 5.28/36 | 5.54/41.0 | [117] | 380468126 | <i>H. brasiliensis</i> | caffeic acid 3-O-methyltransferase        |
| <b>D127</b> | -1.59/1.15   | 5.11/26 | 5.41/27.5 | [159] | 284433794 | <i>J. curcas</i>       | glutathione S-transferase omega           |
| <b>D128</b> | -1.05/-1.64  | 5.56/28 | 6.09/30.8 | [52]  | 255567721 | <i>R. communis</i>     | carboxymethylenebutenolidase, putative    |
| <b>D129</b> | -1.74/1.13   | 5.44/33 | 5.5/34.4  | 82    | 255542380 | <i>R. communis</i>     | cysteine synthase, putative               |

|             |             |         |           |       |           |                        |                                        |
|-------------|-------------|---------|-----------|-------|-----------|------------------------|----------------------------------------|
| <b>D130</b> | -1.62/-1.64 | 5.09/72 | 5.18/90.5 | 174   | 351727028 | <i>G. max</i>          | cell division cycle protein 48 homolog |
| <b>D131</b> | -1.65/-1.12 | 6.28/38 | 6.86/51.8 | [802] | 14916100  | <i>H. brasiliensis</i> | hydroxymethylglutaryl CoA synthase     |
| <b>D132</b> | -1.62/-1.01 | 5.25/34 | 8.64/36.3 | [99]  | 357514973 | <i>M. truncatula</i>   | Annexin D4                             |
| <b>D133</b> | 1.62/1.06   | 5.41/37 | 5.49/42.2 | [314] | 21536853  | <i>A. thaliana</i>     | phosphoglycerate kinase, putative      |
| <b>D134</b> | 1.71/1.16   | 5.68/39 | 5.82/41.6 | [77]  | 255547137 | <i>R. communis</i>     | Alpha-1,4-glucan-protein synthase      |
| <b>D135</b> | -1.02/1.57  | 5.31/25 | 5.48/25.6 | [386] | 333690873 | <i>H. brasiliensis</i> | glutathione-S-transferase tau 1        |
| <b>D136</b> | 1.1/1.72    | 5.15/25 | 5.62/25.8 | [104] | 2970051   | <i>V. radiata</i>      | ARG10                                  |
| <b>D137</b> | -1.66/1.63  | 5.23/21 | 5.64/20.9 | [217] | 2832430   | <i>H. brasiliensis</i> | pro-hevein                             |
| <b>D138</b> | -1.1/-1.71  | 4.98/23 | 4.8/22.3  | [384] | 14423933  | <i>H. brasiliensis</i> | Small rubber particle protein          |
| <b>D139</b> | 1.63/1.09   | 5.01/15 | 5.04/14.7 | [379] | 132270    | <i>H. brasiliensis</i> | Rubber elongation factor protein       |
| <b>D140</b> | -1.56/-1.62 | 5.54/13 | 5.64/20.9 | [344] | 2832430   | <i>H. brasiliensis</i> | pro-hevein                             |
| <b>D141</b> | -1.63/-1.54 | 5.35/13 | 5.63/22.7 | [158] | 123062    | <i>H. brasiliensis</i> | Pro-hevein                             |
| <b>D142</b> | 1.63/1.51   | 5.01/13 | 5.04/14.7 | [405] | 132270    | <i>H. brasiliensis</i> | Rubber elongation factor protein       |
| <b>D143</b> | 1.61/1.64   | 5.11/13 | 5.04/14.7 | [470] | 132270    | <i>H. brasiliensis</i> | Rubber elongation factor protein       |

**Note:**

<sup>a</sup>Assigned spot number (D1-D143) as indicated in Fig. 3.

<sup>b</sup>The relatively changed ratios of the target protein spots in the 3 and 5 days latex from rubber trees treated by water and ethylene. All the protein spots in the 2-D DIGE gels were analyzed by DeCyder 7.0 software.

<sup>c, d</sup>The experimental (c) and theoretical (d) values for the mass (kDa) and *pI* of identified proteins. The theoretical values were retrieved from the protein database, and the experimental values were produced by ImageMaster.

<sup>e</sup>Mascot searched scores (M.S.) against NCBI nr for the MS and [MS/MS] searched results.

<sup>f</sup>Database accession (gi) numbers according to NCBI nr.

**Supplementary Table S3** MS information of ethylene responsive latex proteins by iTRAQ

| <b>Protein No. I<sup>a</sup></b> | <b>Un<sup>b</sup> Score</b> | <b>Cov.<sup>c</sup> 95%</b> | <b>Peptides<sup>d</sup> (95%)</b> | <b>Ratio<sup>e</sup> E3/D3</b> | <b>Ratio<sup>e</sup> E5/D5</b> | <b>Accession species<sup>f</sup></b> | <b>Protein name</b>                        |
|----------------------------------|-----------------------------|-----------------------------|-----------------------------------|--------------------------------|--------------------------------|--------------------------------------|--------------------------------------------|
| 2                                | 66.5                        | 67.1                        | 135                               | 0.38                           | 0.57                           | tr D1M8S7 D1M8S7_HEVBR               | Beta-1,3-glucanase                         |
| 5                                | 58.21                       | 95.4                        | 66                                | 3.25                           | 1.54                           | sp Q39967 ALL5_HEVBR                 | Major latex allergen Hev b 5               |
| 7                                | 54.77                       | 71.6                        | 105                               | 0.33                           | 0.30                           | tr Q706V4 Q706V4_HEVBR               | Latex allergen hev b 7.02                  |
| 10                               | 44.55                       | 56.2                        | 49                                | 0.39                           | 0.75                           | tr E5FR85 E5FR85_MORAL               | Actin                                      |
| 11                               | 43.62                       | 38.3                        | 34                                | 1.58                           | 1.42                           | tr Q71EE1 Q71EE1_HEVBR               | Heat shock protein                         |
| 12                               | 42.03                       | 35.4                        | 37                                | 0.46                           | 0.56                           | tr Q5VLJ6 Q5VLJ6_HEVBR               | 50 kDa protein                             |
| 13                               | 41.88                       | 76                          | 55                                | 0.65                           | 0.45                           | tr A9ZMZ4 A9ZMZ4_HEVBR               | Acetyl-CoA C-acetyltransferase             |
| 15                               | 39.75                       | 45.2                        | 55                                | 0.30                           | 0.37                           | sp Q9LEJ0 ENO1_HEVBR                 | Enolase 1                                  |
| 17                               | 37.25                       | 65.5                        | 49                                | 0.52                           | 0.30                           | tr Q9ZSP8 Q9ZSP8_HEVBR               | Latex-abundant protein                     |
| 18                               | 34.69                       | 43.4                        | 22                                | 0.49                           | 0.35                           | tr Q944G0 Q944G0_HEVBR               | Mevalonate diphosphate decarboxylase       |
| 19                               | 32.73                       | 46.6                        | 41                                | 0.50                           | 0.77                           | sp P81406 GAPN_PEA                   | glyceraldehyde-3-phosphate dehydrogenase   |
| 22                               | 31.1                        | 42.7                        | 22                                | 0.19                           | 0.44                           | tr Q944F8 Q944F8_HEVBR               | Hydroxymethylglutaryl CoA synthase         |
| 23                               | 30.18                       | 25.5                        | 30                                | 2.17                           | 1.57                           | tr B9SI90 B9SI90_RICCO               | Methyl transferase                         |
| 24                               | 30.15                       | 42                          | 36                                | 0.31                           | 0.59                           | tr B9RZR0 B9RZR0_RICCO               | ATP-citrate synthase                       |
| 25                               | 29.94                       | 42.5                        | 31                                | 0.34                           | 0.36                           | tr B9R8U5 B9R8U5_RICCO               | Phosphofructokinase, putative              |
| 27                               | 27.55                       | 51.5                        | 17                                | 0.53                           | 0.86                           | tr F2YZ43 F2YZ43_HEVBR               | 14-3-3 protein 2                           |
| 28                               | 27.3                        | 65.4                        | 20                                | 0.38                           | 0.39                           | tr Q40208 Q40208_LOTJA               | RAB2A                                      |
| 30                               | 27.13                       | 90                          | 24                                | 0.33                           | 0.40                           | tr F8SKC5 F8SKC5_HEVBR               | Elicitor-responsive protein                |
| 31                               | 27.02                       | 37.6                        | 16                                | 1.60                           | 1.32                           | tr C6TEK4 C6TEK4_SOYBN               | phospholipase D alpha 1                    |
| 32                               | 27.02                       | 22.7                        | 28                                | 0.63                           | 0.55                           | tr B9RV56 B9RV56_RICCO               | Phospholipase D                            |
| 33                               | 26.07                       | 64.5                        | 48                                | 0.06                           | 0.28                           | tr B3FNQ1 B3FNQ1_HEVBR               | Peptidyl-prolyl cis-trans isomerase        |
| 39                               | 24.89                       | 97.4                        | 54                                | 0.39                           | 0.61                           | tr Q84T88 Q84T88_HEVBR               | Small rubber particle protein              |
| 40                               | 24.28                       | 45.2                        | 40                                | 2.07                           | 1.56                           | tr Q8H9B1 Q8H9B1_9ROSI               | eukaryotic translation elongation factor 1 |
| 42                               | 24.12                       | 36.8                        | 28                                | 1.87                           | 1.11                           | tr B9SP64 B9SP64_RICCO               | Phosphoglucomutase, putative               |
| 43                               | 23.88                       | 22.7                        | 15                                | 0.59                           | 0.70                           | tr B9S8D6 B9S8D6_RICCO               | Trehalose-6-phosphate synthase             |
| 49                               | 22.33                       | 12.4                        | 11                                | 1.84                           | 2.19                           | tr B9I8G4 B9I8G4_POPTR               | Exportin-1                                 |
| 50                               | 22.29                       | 26                          | 14                                | 1.51                           | 2.20                           | tr E9KF95 E9KF95_HEVBR               | Invertase 2                                |
| 53                               | 21.98                       | 15.9                        | 14                                | 0.57                           | 0.62                           | tr A9NIV2 A9NIV2_MANES               | Sucrose synthase                           |
| 54                               | 21.97                       | 32.8                        | 19                                | 0.31                           | 0.92                           | tr B9NBW3 B9NBW3_POPTR               | Malate dehydrogenase                       |
| 55                               | 21.39                       | 30.8                        | 18                                | 1.51                           | 1.63                           | tr B9RSN1 B9RSN1_RICCO               | Chaperonin containing t-complex protein 1  |
| 57                               | 21.05                       | 24.2                        | 17                                | 3.50                           | 2.24                           | tr E4MXI2 E4MXI2_THEHA               | Luminal binding protein                    |
| 58                               | 21.05                       | 22.7                        | 12                                | 0.36                           | 0.70                           | tr B9RM60 B9RM60_RICCO               | Glu-fructose-6-phosphate aminotransferase  |
| 60                               | 20.86                       | 29.1                        | 28                                | 0.29                           | 0.40                           | tr B9STR1 B9STR1_RICCO               | Leucine aminopeptidase, putative 1         |
| 61                               | 20.57                       | 41.2                        | 17                                | 0.63                           | 0.39                           | tr B9RIY3 B9RIY3_RICCO               | Rab GDP dissociation inhibitor             |
| 64                               | 19.65                       | 36.3                        | 16                                | 0.60                           | 0.44                           | tr B9RLK7 B9RLK7_RICCO               | Alpha-1,4-glucan-protein synthase          |
| 69                               | 18.74                       | 19.2                        | 18                                | 0.58                           | 0.57                           | tr B9RBP6 B9RBP6_RICCO               | Heat shock protein 70                      |
| 70                               | 18.66                       | 38.1                        | 12                                | 0.52                           | 0.45                           | tr Q9ZSZ6 Q9ZSZ6_HEVBR               | DnaJ protein                               |
| 71                               | 18.31                       | 33.9                        | 13                                | 0.54                           | 0.63                           | tr B9RHY3 B9RHY3_RICCO               | Phosphoglycerate kinase                    |
| 73                               | 18.11                       | 13.1                        | 13                                | 0.63                           | 0.52                           | tr B9SYR5 B9SYR5_RICCO               | Alanyl-tRNA synthetase, putative           |
| 76                               | 17.33                       | 21.8                        | 9                                 | 1.72                           | 1.29                           | tr B9I5Y4 B9I5Y4_POPTR               | T-complex protein 1 subunit theta          |
| 77                               | 17.27                       | 42.2                        | 15                                | 2.23                           | 1.96                           | tr Q8L3U6 Q8L3U6_HEVBR               | Cis-prenyl transferase II                  |

|            |       |      |    |       |      |                        |                                               |
|------------|-------|------|----|-------|------|------------------------|-----------------------------------------------|
| <b>80</b>  | 16.77 | 39.6 | 10 | 0.47  | 0.72 | tr B9S943 B9S943_RICCO | GTP-binding protein ras-like protein          |
| <b>83</b>  | 16.69 | 7.1  | 7  | 0.23  | 0.66 | tr F6HJZ9 F6HJZ9_VITVI | cullin-associated protein 1                   |
| <b>85</b>  | 16.45 | 40.7 | 14 | 1.71  | 1.12 | tr B9RR89 B9RR89_RICCO | Proteasome subunit alpha type                 |
| <b>86</b>  | 16.41 | 37.5 | 8  | 2.07  | 1.87 | tr C6TKI4 C6TKI4_SOYBN | Proteasome subunit alpha type                 |
| <b>87</b>  | 16.33 | 16.6 | 10 | 0.41  | 0.26 | tr B9R7S8 B9R7S8_RICCO | Glucose-6-phosphate isomerase                 |
| <b>89</b>  | 16.31 | 19.8 | 12 | 2.11  | 1.37 | tr B9S5K6 B9S5K6_RICCO | 26S proteasome regulatory subunit             |
| <b>95</b>  | 16.17 | 27.3 | 13 | 0.47  | 0.74 | tr D2D2Z1 D2D2Z1_GOSHI | UDP-D-glucose pyrophosphorylase               |
| <b>98</b>  | 15.62 | 14.3 | 12 | 0.61  | 0.59 | tr B9SJV6 B9SJV6_RICCO | Eukaryotic translation initiation factor 2c   |
| <b>99</b>  | 15.49 | 11.9 | 10 | 1.80  | 1.49 | tr A5AHP0 A5AHP0_VITVI | Coatomer subunit beta                         |
| <b>102</b> | 15.18 | 18.4 | 15 | 0.42  | 0.59 | tr B9SH99 B9SH99_RICCO | Nucleoredoxin, putative                       |
| <b>106</b> | 14.96 | 32.3 | 13 | 0.44  | 0.76 | tr B9SIT3 B9SIT3_RICCO | L-lactate dehydrogenase                       |
| <b>108</b> | 14.87 | 27.6 | 10 | 1.51  | 1.47 | tr A5BEF3 A5BEF3_VITVI | 26S proteasome regulatory subunit 4           |
| <b>109</b> | 14.75 | 17.6 | 10 | 0.55  | 0.72 | tr B9SS36 B9SS36_RICCO | Chaperonin containing t-complex protein 1     |
| <b>112</b> | 14.47 | 30   | 13 | 0.08  | 0.10 | tr B9RXK1 B9RXK1_RICCO | Lactoylglutathione lyase, putative            |
| <b>115</b> | 14.31 | 28.7 | 9  | 3.10  | 1.52 | tr B9SN65 B9SN65_RICCO | Glucose 4-6-dehydratase, putative             |
| <b>117</b> | 14.13 | 42.8 | 7  | 0.30  | 0.37 | tr A9PFQ6 A9PFQ6_POPTR | Regulator of ribonuclease activity A          |
| <b>119</b> | 14.02 | 22.1 | 8  | 0.22  | 0.28 | tr Q547W6 Q547W6_HEVBR | Hydroxymethylglutaryl CoA reductase           |
| <b>122</b> | 13.95 | 13.5 | 11 | 0.58  | 1.19 | tr B9II82 B9II82_POPTR | villin-2                                      |
| <b>125</b> | 13.43 | 11.8 | 11 | 0.17  | 0.40 | tr F6HTU8 F6HTU8_VITVI | Cysteine synthase                             |
| <b>129</b> | 13.13 | 39.2 | 7  | 0.52  | 0.66 | tr C6TGU2 C6TGU2_SOYBN | Proteasome subunit alpha type                 |
| <b>131</b> | 12.95 | 31.6 | 7  | 2.47  | 1.62 | sp O22518 RSSA_SOYBN   | 40S ribosomal protein SA                      |
| <b>132</b> | 12.91 | 19.8 | 9  | 2.27  | 1.66 | tr D2D2Z2 D2D2Z2_GOSHI | UDP-D-glucose dehydrogenase                   |
| <b>133</b> | 12.91 | 25.4 | 9  | 0.56  | 0.73 | tr Q8L7F4 Q8L7F4_HEVBR | Farnesyl diphosphate synthase                 |
| <b>134</b> | 12.79 | 27.6 | 9  | 0.21  | 0.77 | tr F6HPS0 F6HPS0_VITVI | Serine/threonine-protein phosphatase          |
| <b>135</b> | 12.78 | 18.2 | 12 | 0.63  | 1.20 | tr B9RCK2 B9RCK2_RICCO | Calcium-dependent protein kinase              |
| <b>136</b> | 12.7  | 18.5 | 6  | 0.64  | 0.79 | tr D7TKK5 D7TKK5_VITVI | obg-like ATPase 1                             |
| <b>138</b> | 12.64 | 19.3 | 9  | 0.46  | 0.69 | tr D7SUQ2 D7SUQ2_VITVI | GTP-binding nuclear protein Ran-3             |
| <b>141</b> | 12.36 | 27   | 10 | 0.55  | 0.47 | tr D7SUD7 D7SUD7_VITVI | Aspartate aminotransferase                    |
| <b>145</b> | 12.21 | 34.9 | 15 | 0.29  | 0.38 | sp Q39962 CBPR_HEVBR   | Citrate-binding protein                       |
| <b>148</b> | 12    | 61.8 | 41 | 0.55  | 0.66 | tr A9ZMZ5 A9ZMZ5_HEVBR | Acetyl-CoA C-acetyltransferase                |
| <b>150</b> | 11.87 | 29.8 | 10 | 2.40  | 1.42 | sp Q39963 PDX1_HEVBR   | Pyridoxal biosynthesis protein PDX1           |
| <b>151</b> | 11.81 | 27.5 | 9  | 1.75  | 1.51 | tr B9RC03 B9RC03_RICCO | NAD dependent epimerase/dehydratase           |
| <b>152</b> | 11.77 | 50   | 23 | 0.61  | 0.63 | tr B1NDK1 B1NDK1_9ERIC | Calmodulin                                    |
| <b>160</b> | 11.38 | 20.7 | 7  | 0.44  | 0.62 | tr B9RAM4 B9RAM4_RICCO | 26S proteasome non-atpase                     |
| <b>161</b> | 11.37 | 21.3 | 22 | 0.31  | 0.42 | tr Q6XNP8 Q6XNP8_HEVBR | Abscisic acid stress ripening-related protein |
| <b>167</b> | 11.12 | 18   | 7  | 10.47 | 2.51 | tr C7B9C0 C7B9C0_RICCO | Myo-inositol-1-phosphate synthase             |
| <b>168</b> | 10.98 | 22.2 | 11 | 0.45  | 0.64 | tr B9SZU0 B9SZU0_RICCO | Catalytic, putative                           |
| <b>169</b> | 10.97 | 15.2 | 5  | 1.53  | 1.66 | tr B9SWY5 B9SWY5_RICCO | Proliferation-associated 2g4                  |
| <b>170</b> | 10.95 | 26.1 | 12 | 0.30  | 0.52 | tr B9SVA7 B9SVA7_RICCO | Aspartic proteinase, putative                 |
| <b>175</b> | 10.83 | 33.5 | 8  | 0.08  | 0.59 | tr Q6J6I5 Q6J6I5_HEVBR | Phosphoglyceride transfer protein             |
| <b>182</b> | 10.63 | 15.2 | 10 | 1.75  | 1.24 | tr B9RYE9 B9RYE9_RICCO | Polyadenylate-binding protein,                |
| <b>186</b> | 10.47 | 29   | 7  | 1.60  | 1.41 | tr B9SPS6 B9SPS6_RICCO | Proteasome subunit beta type                  |
| <b>187</b> | 10.45 | 42.2 | 8  | 0.52  | 0.70 | tr B9GTP5 B9GTP5_POPTR | ras-related protein RABC1 isoform             |
| <b>188</b> | 10.41 | 17.3 | 7  | 7.52  | 1.63 | sp P29685 ATPBM_HEVBR  | ATP synthase subunit beta                     |

|            |       |      |    |      |      |                        |                                             |
|------------|-------|------|----|------|------|------------------------|---------------------------------------------|
| <b>191</b> | 10.38 | 7    | 5  | 0.58 | 0.60 | tr B9RUL1 B9RUL1_RICCO | Acid phosphatase, putative                  |
| <b>195</b> | 10.23 | 4.2  | 5  | 5.50 | 2.29 | tr B9RN01 B9RN01_RICCO | Putative uncharacterized protein            |
| <b>197</b> | 10.18 | 24.9 | 10 | 0.55 | 0.59 | tr B9SIC4 B9SIC4_RICCO | chitinase Class I, putative                 |
| <b>198</b> | 10.16 | 20.1 | 9  | 0.52 | 0.31 | tr B9RTJ4 B9RTJ4_RICCO | Stem-specific protein TSJT1SV=1             |
| <b>204</b> | 9.98  | 21.7 | 9  | 1.85 | 1.56 | tr A9PFJ7 A9PFJ7_POPTR | Pyruvate kinase                             |
| <b>205</b> | 9.88  | 66.3 | 40 | 0.66 | 0.75 | tr F8RW92 F8RW92_HEVBR | Peptidyl-prolyl cis-trans isomerase         |
| <b>208</b> | 9.79  | 6.4  | 6  | 3.31 | 2.11 | tr B9T1E9 B9T1E9_RICCO | Importin beta-3, putative                   |
| <b>210</b> | 9.66  | 31.3 | 12 | 1.67 | 1.53 | tr Q2XPH2 Q2XPH2_MANIN | Profilin                                    |
| <b>212</b> | 9.6   | 37.5 | 7  | 0.35 | 0.72 | tr Q8GZP2 Q8GZP2_HEVBR | Superoxide dismutase [Cu-Zn]                |
| <b>213</b> | 9.57  | 13.9 | 8  | 0.66 | 0.53 | tr B9RKX9 B9RKX9_RICCO | Seryl-tRNA synthetase, putative             |
| <b>216</b> | 9.47  | 18.8 | 21 | 0.36 | 0.77 | tr B9GH43 B9GH43_POPTR | Phospholipase D                             |
| <b>219</b> | 9.44  | 47.7 | 12 | 0.65 | 0.66 | tr F2YZ44 F2YZ44_HEVBR | 14-3-3 protein 3                            |
| <b>220</b> | 9.44  | 19.2 | 6  | 0.61 | 0.63 | tr Q14VV8 Q14VV8_BOENI | Caffeic acid O-methyltransferase            |
| <b>221</b> | 9.34  | 35.3 | 10 | 0.28 | 0.53 | tr D2JWP4 D2JWP4_POPDE | Pathogenesis-related thaumatin              |
| <b>224</b> | 9.24  | 32.6 | 7  | 0.52 | 0.61 | tr D2WL72 D2WL72_POPTR | Glutathione transferase                     |
| <b>226</b> | 9.2   | 32.7 | 26 | 0.57 | 0.52 | tr E8Z9H3 E8Z9H3_HEVBR | Latex cystatin                              |
| <b>227</b> | 9.17  | 40.6 | 14 | 0.17 | 0.40 | tr F2VXU6 F2VXU6_HEVBR | Rab4                                        |
| <b>230</b> | 9.12  | 14.9 | 7  | 0.54 | 0.62 | tr B9H8X6 B9H8X6_POPTR | 6-phosphofructokinase 3                     |
| <b>241</b> | 8.78  | 35.9 | 6  | 0.40 | 0.58 | tr D6BR55 D6BR55_9ROSI | Acyl-CoA-binding protein                    |
| <b>242</b> | 8.71  | 61.9 | 13 | 0.58 | 0.58 | tr D9I9X9 D9I9X9_HEVBR | Actin-depolymerizing factor                 |
| <b>244</b> | 8.65  | 23.3 | 6  | 1.61 | 1.50 | tr B9R7X1 B9R7X1_RICCO | Proteasome subunit alpha type               |
| <b>245</b> | 8.65  | 41.8 | 7  | 0.65 | 0.70 | tr F8RWS9 F8RWS9_HEVBR | ubiquitin-protein ligase 1                  |
| <b>246</b> | 8.6   | 12.1 | 6  | 1.79 | 0.69 | tr B9HR67 B9HR67_POPTR | Plant synaptotagmin                         |
| <b>247</b> | 8.57  | 6.7  | 4  | 2.03 | 1.66 | tr B9SE11 B9SE11_RICCO | Delta 1-pyrroline-5-carboxylate synthetase  |
| <b>248</b> | 8.56  | 16.7 | 6  | 0.34 | 0.50 | tr F6HNF4 F6HNF4_VITVI | adenosine kinase 2                          |
| <b>256</b> | 8.36  | 19.2 | 6  | 0.66 | 0.75 | tr B9HJ73 B9HJ73_POPTR | Fructose-bisphosphate aldolase              |
| <b>261</b> | 8.15  | 14.2 | 8  | 0.53 | 0.96 | tr B9RKG2 B9RKG2_RICCO | Arginyl-tRNA synthetase, putative           |
| <b>262</b> | 8.15  | 10.3 | 5  | 0.20 | 0.65 | tr E2DQG6 E2DQG6_MANES | Carotenoid cleavage dioxygenase 1           |
| <b>264</b> | 8.09  | 43   | 5  | 0.28 | 0.31 | tr B3FNP8 B3FNP8_HEVBR | Glutaredoxin                                |
| <b>266</b> | 8.05  | 42   | 8  | 0.46 | 0.58 | tr B9T509 B9T509_RICCO | ras-related protein RABA3                   |
| <b>267</b> | 8.02  | 29   | 6  | 0.39 | 0.12 | tr B9RKM9 B9RKM9_RICCO | Peroxiredoxin, putative                     |
| <b>268</b> | 8     | 9.3  | 4  | 1.53 | 1.67 | tr B9S6T7 B9S6T7_RICCO | Ubiquilin, putative                         |
| <b>269</b> | 7.99  | 7.5  | 5  | 0.61 | 0.57 | tr B9IGY9 B9IGY9_POPTR | 2,3-bisphosphoglycerate mutase              |
| <b>278</b> | 7.82  | 20.6 | 10 | 0.58 | 0.62 | tr B9SXW5 B9SXW5_RICCO | 26S proteasome non-atpase                   |
| <b>279</b> | 7.78  | 14.4 | 7  | 0.47 | 0.67 | tr B9GXV5 B9GXV5_POPTR | FAS-associated factor 2                     |
| <b>280</b> | 7.72  | 3.6  | 5  | 0.34 | 0.50 | tr B9RRX1 B9RRX1_RICCO | Putative uncharacterized protein            |
| <b>281</b> | 7.7   | 12.3 | 5  | 3.25 | 0.90 | tr B9SR96 B9SR96_RICCO | Glutamate decarboxylase, putative           |
| <b>284</b> | 7.66  | 15   | 5  | 0.38 | 1.00 | tr B2Z6Q5 B2Z6Q5_POPTR | hydroxycinnamoyltransferase                 |
| <b>289</b> | 7.53  | 7.3  | 6  | 1.50 | 1.39 | tr B9SCN8 B9SCN8_RICCO | Eukaryotic translation initiation factor 2c |
| <b>290</b> | 7.51  | 21.9 | 22 | 0.66 | 1.37 | tr O04975 O04975_MESCR | Fructose-bisphosphate aldolase              |
| <b>293</b> | 7.44  | 18.2 | 5  | 0.11 | 0.68 | tr B9S3Y6 B9S3Y6_RICCO | Nuclear protein localization                |
| <b>297</b> | 7.32  | 21.9 | 5  | 0.50 | 0.64 | tr B9S228 B9S228_RICCO | Nucleic acid binding protein                |
| <b>299</b> | 7.28  | 28.7 | 9  | 1.57 | 0.84 | tr B9HUT6 B9HUT6_POPTR | Proteasome subunit beta type                |
| <b>306</b> | 7.1   | 12.1 | 5  | 2.78 | 1.59 | tr B9HIC5 B9HIC5_POPTR | differentiation associated protein          |

|            |      |      |    |       |      |                        |                                              |
|------------|------|------|----|-------|------|------------------------|----------------------------------------------|
| <b>310</b> | 7.05 | 18.2 | 4  | 1.51  | 1.12 | tr B9RIC4 B9RIC4_RICCO | 40S ribosomal protein S2, putative           |
| <b>314</b> | 6.98 | 13.9 | 4  | 0.47  | 0.52 | tr A9PEP6 A9PEP6_POPTR | DNA damage-inducible protein                 |
| <b>315</b> | 6.98 | 5    | 4  | 0.44  | 0.60 | tr F6H158 F6H158_VITVI | Putative uncharacterized protein             |
| <b>321</b> | 6.86 | 6.5  | 3  | 1.80  | 1.08 | tr B9SG36 B9SG36_RICCO | Ubiquitin-protein ligase, putative           |
| <b>322</b> | 6.86 | 20.2 | 7  | 0.44  | 2.25 | tr B9GXZ6 B9GXZ6_POPTR | alanine aminotransferase                     |
| <b>324</b> | 6.85 | 19.6 | 5  | 0.51  | 0.71 | tr A5AQP2 A5AQP2_VITVI | ATP-citrate synthase alpha chain             |
| <b>327</b> | 6.81 | 33.3 | 36 | 0.65  | 0.70 | tr B2MW33 B2MW33_HEVBR | Heat shock protein 70                        |
| <b>328</b> | 6.77 | 17.7 | 5  | 0.32  | 2.32 | tr B9SCD6 B9SCD6_RICCO | Esterase D, putative                         |
| <b>329</b> | 6.77 | 30.3 | 6  | 0.23  | 0.75 | tr B9H2B8 B9H2B8_POPTR | Predicted protein                            |
| <b>335</b> | 6.7  | 24.3 | 7  | 0.37  | 0.53 | tr B9RLJ0 B9RLJ0_RICCO | L-asparaginase, putative                     |
| <b>338</b> | 6.66 | 12.1 | 4  | 0.61  | 1.26 | tr B9HLM0 B9HLM0_POPTR | Chorismate synthase                          |
| <b>343</b> | 6.6  | 17.6 | 4  | 2.09  | 0.82 | tr B9SKG4 B9SKG4_RICCO | 40S ribosomal protein S11, putative          |
| <b>345</b> | 6.54 | 6.8  | 4  | 0.33  | 1.27 | tr E6NU17 E6NU17_9ROSI | JHL07K02.17 protein                          |
| <b>348</b> | 6.52 | 7    | 4  | 31.33 | 2.51 | tr B9SUE9 B9SUE9_RICCO | Hydrolase, O-glycosyl compounds              |
| <b>349</b> | 6.51 | 31.9 | 4  | 2.42  | 1.28 | tr B9SWB0 B9SWB0_RICCO | 60S ribosomal protein L12, putative          |
| <b>350</b> | 6.49 | 14.7 | 4  | 0.48  | 0.84 | tr B9HG22 B9HG22_POPTR | GTP-binding protein                          |
| <b>351</b> | 6.48 | 37.8 | 14 | 0.39  | 0.72 | tr A9ZN23 A9ZN23_HEVBR | Cis-prenyl transferase                       |
| <b>355</b> | 6.46 | 22.7 | 3  | 2.27  | 0.86 | tr B9S120 B9S120_RICCO | 40S ribosomal protein S14, putative          |
| <b>357</b> | 6.44 | 64   | 14 | 0.51  | 1.17 | tr Q6T708 Q6T708_HEVBR | Rubber elongation factor                     |
| <b>364</b> | 6.34 | 13.9 | 5  | 0.60  | 0.62 | tr Q9ZTT8 Q9ZTT8_GOSHI | Chitinase, Class I                           |
| <b>366</b> | 6.31 | 67.1 | 9  | 2.78  | 1.56 | tr B3FNP9 B3FNP9_HEVBR | Protease inhibitor protein                   |
| <b>369</b> | 6.2  | 51.7 | 17 | 2.61  | 1.12 | tr A9P8X5 A9P8X5_POPTR | Ras-related protein RABB1b                   |
| <b>370</b> | 6.18 | 11.2 | 7  | 1.64  | 1.17 | tr F6HGX0 F6HGX0_VITVI | Asparaginyl-tRNA synthetase                  |
| <b>371</b> | 6.18 | 17.6 | 5  | 0.63  | 1.25 | tr O24328 O24328_RICCO | S-adenosyl-methionine hyltransferase         |
| <b>372</b> | 6.14 | 8.1  | 3  | 2.31  | 2.14 | tr F6HQV3 F6HQV3_VITVI | 60S ribosomal protein L4                     |
| <b>373</b> | 6.14 | 13.6 | 3  | 0.28  | 0.31 | tr B9SE47 B9SE47_RICCO | Malate dehydrogenase                         |
| <b>374</b> | 6.12 | 18.5 | 7  | 0.09  | 0.29 | tr B9SUZ4 B9SUZ4_RICCO | Alcohol dehydrogenase                        |
| <b>375</b> | 6.11 | 17.5 | 14 | 0.39  | 0.51 | tr G3G858 G3G858_CAMSI | Methionine synthase                          |
| <b>382</b> | 6.03 | 24.2 | 4  | 1.71  | 1.47 | tr B9SA27 B9SA27_RICCO | Trafficking protein particle complex subunit |
| <b>383</b> | 6.02 | 9.9  | 3  | 0.50  | 0.58 | tr Q5J3P0 Q5J3P0_MALDO | Sucrose phosphate phosphatase                |
| <b>386</b> | 6    | 19.1 | 3  | 2.19  | 1.74 | tr B9RYZ1 B9RYZ1_RICCO | 60S ribosomal protein L9                     |
| <b>389</b> | 6    | 6.5  | 3  | 6.19  | 1.20 | tr B9IBL7 B9IBL7_POPTR | Predicted protein                            |
| <b>390</b> | 5.99 | 18   | 7  | 0.39  | 0.71 | tr F6I510 F6I510_VITVI | Putative uncharacterized protein             |
| <b>391</b> | 5.98 | 11.8 | 5  | 0.54  | 1.06 | tr B9IER7 B9IER7_POPTR | Carbonic anhydrase                           |
| <b>392</b> | 5.95 | 7.6  | 4  | 5.06  | 1.78 | tr B9SN36 B9SN36_RICCO | Protein SEY1;root hair defective 3           |
| <b>395</b> | 5.85 | 17.4 | 3  | 1.75  | 1.46 | tr B9SU88 B9SU88_RICCO | Receptor for activated protein kinase        |
| <b>401</b> | 5.79 | 22.9 | 4  | 1.61  | 3.14 | tr G0YC94 G0YC94_9ROSI | Fumarylacetoacetate hydrolase                |
| <b>408</b> | 5.72 | 65.7 | 8  | 1.51  | 1.34 | sp Q6XNP7 HPI_HEVBR    | Protease inhibitor                           |
| <b>409</b> | 5.7  | 13.6 | 8  | 0.58  | 0.50 | tr B9T5Y1 B9T5Y1_RICCO | bisphosphate phosphodiesterase               |
| <b>410</b> | 5.68 | 8.9  | 4  | 2.29  | 2.13 | tr B9GU26 B9GU26_POPTR | Protein disulfide isomerase, putative        |
| <b>412</b> | 5.65 | 8.4  | 4  | 3.16  | 1.62 | tr F6HLF4 F6HLF4_VITVI | DEAD-box ATP-dependent RNA helicase          |
| <b>413</b> | 5.62 | 15.1 | 3  | 0.64  | 1.24 | tr B9A9C9 B9A9C9_MORAL | Urease accessory protein ureG                |
| <b>414</b> | 5.61 | 7.9  | 3  | 0.41  | 1.27 | tr B9N3J3 B9N3J3_POPTR | Predicted protein                            |
| <b>419</b> | 5.57 | 11.9 | 2  | 0.41  | 0.73 | tr B9IJM2 B9IJM2_POPTR | Predicted protein                            |



|     |      |      |    |       |      |                        |                                                     |
|-----|------|------|----|-------|------|------------------------|-----------------------------------------------------|
| 422 | 5.53 | 43.4 | 9  | 0.25  | 0.39 | tr Q94KV2 Q94KV2_MANES | Aspartic protease                                   |
| 424 | 5.45 | 43.5 | 31 | 3.02  | 2.08 | tr B9HV14 B9HV14_POPTR | Vacuolar H <sup>+</sup> -ATPase catalytic subunit A |
| 426 | 5.44 | 42.9 | 55 | 0.41  | 0.51 | sp Q9LEI9 ENO2_HEVBR   | Enolase 2                                           |
| 429 | 5.42 | 8.3  | 4  | 0.43  | 0.58 | tr C6TFR0 C6TFR0_SOYBN | alpha-galactosidase-like isoform 1                  |
| 436 | 5.37 | 7.2  | 3  | 0.65  | 1.35 | tr Q6S9W9 Q6S9W9_GOSHI | Betaine-aldehyde dehydrogenase                      |
| 437 | 5.35 | 12.4 | 5  | 0.45  | 0.61 | tr B9SPZ1 B9SPZ1_RICCO | 2-hydroxyphytanoyl-CoA lyase                        |
| 439 | 5.34 | 9.4  | 5  | 2.58  | 2.14 | sp Q38871 CDPK5_ARATH  | Calcium-dependent protein kinase 5                  |
| 441 | 5.34 | 8    | 6  | 0.10  | 0.39 | tr B9SX16 B9SX16_RICCO | acetylglucosamine transferase                       |
| 447 | 5.22 | 16.1 | 4  | 0.21  | 0.17 | tr D7TLU7 D7TLU7_VITVI | Triosephosphate isomerase                           |
| 448 | 5.22 | 17.3 | 4  | 9.73  | 2.08 | tr B9RUZ3 B9RUZ3_RICCO | Serine-threonine kinase receptor                    |
| 449 | 5.22 | 21.7 | 3  | 1.56  | 1.71 | tr A9PGL4 A9PGL4_POPTR | 40S ribosomal protein                               |
| 453 | 5.19 | 20.4 | 5  | 0.38  | 0.53 | tr B9MU39 B9MU39_POPTR | quinone oxidoreductase, putative                    |
| 456 | 5.16 | 59.1 | 79 | 0.13  | 0.65 | tr Q7XJ83 Q7XJ83_HEVBR | Beta-1,3-glucanase                                  |
| 459 | 5.11 | 38.7 | 34 | 0.47  | 0.54 | tr B9HIN6 B9HIN6_POPTR | ATP-citrate synthase beta chain                     |
| 467 | 4.99 | 7.7  | 3  | 1.58  | 1.11 | tr D7U7I9 D7U7I9_VITVI | COP9 signalosome complex 1                          |
| 475 | 4.89 | 5.6  | 2  | 0.60  | 0.64 | tr B9RF45 B9RF45_RICCO | Amidase, putative                                   |
| 478 | 4.86 | 5.2  | 3  | 0.52  | 1.06 | tr B9SBV7 B9SBV7_RICCO | Ligatin, putative                                   |
| 481 | 4.82 | 5.9  | 2  | 3.40  | 1.38 | tr B9RMR2 B9RMR2_RICCO | Steroid dehydrogenase, putative                     |
| 482 | 4.81 | 11.6 | 5  | 0.61  | 0.56 | tr B9SGQ4 B9SGQ4_RICCO | Importin alpha-2 subunit, putative                  |
| 485 | 4.79 | 8.8  | 4  | 0.58  | 0.72 | tr B9HRN7 B9HRN7_POPTR | Adenylyl cyclase-associated protein                 |
| 487 | 4.74 | 10.6 | 2  | 0.66  | 0.89 | tr B9RF46 B9RF46_RICCO | Mevalonate kinase, putative                         |
| 498 | 4.69 | 30.4 | 34 | 0.10  | 0.44 | tr B6EBD6 B6EBD6_SOYBN | Heat shock protein 90-2                             |
| 503 | 4.65 | 4.9  | 2  | 0.60  | 0.69 | tr A9PF66 A9PF66_POPTR | isoflavone reductase related protein                |
| 504 | 4.65 | 13.2 | 3  | 0.44  | 0.57 | tr Q9STB5 Q9STB5_HEVBR | Superoxide dismutase                                |
| 506 | 4.63 | 16.6 | 7  | 0.63  | 0.70 | tr C6TIP9 C6TIP9_SOYBN | Cysteine synthase                                   |
| 510 | 4.59 | 15.8 | 15 | 1.54  | 1.43 | tr B9T216 B9T216_RICCO | Fimbrin, putative                                   |
| 511 | 4.59 | 5.2  | 2  | 0.26  | 1.11 | tr B9HMM6 B9HMM6_POPTR | Folylpolyglutamate synthase                         |
| 512 | 4.58 | 5.5  | 6  | 1.61  | 1.52 | tr B9S596 B9S596_RICCO | Myosin XI, putative                                 |
| 514 | 4.58 | 4.5  | 3  | 0.29  | 0.25 | tr A5C5R6 A5C5R6_VITVI | Cinnamyl alcohol dehydrogenase 1                    |
| 516 | 4.57 | 12.2 | 5  | 0.14  | 0.57 | tr B9S1F8 B9S1F8_RICCO | Acetylornithine deacetylase                         |
| 520 | 4.51 | 5.6  | 5  | 0.38  | 0.57 | tr B9SUT5 B9SUT5_RICCO | Isoleucyl tRNA synthetase, putative                 |
| 533 | 4.37 | 9.8  | 2  | 0.31  | 0.21 | tr D7LDD9 D7LDD9_ARALL | 3R-hydroxymyristoyl ACP dehydrase                   |
| 534 | 4.35 | 20   | 10 | 0.23  | 0.36 | tr B9RHV9 B9RHV9_RICCO | Glyceraldehyde 3-phosphate dehydrogenase            |
| 536 | 4.35 | 12.9 | 5  | 0.22  | 0.55 | tr B5M1W3 B5M1W3_RHEAU | Glutathione-S-transferase                           |
| 547 | 4.31 | 15.8 | 8  | 15.42 | 3.93 | tr Q9M563 Q9M563_VITVI | Beta-1,3-glucanase                                  |
| 549 | 4.3  | 17.7 | 5  | 0.18  | 2.47 | tr B9HFG8 B9HFG8_POPTR | annexin1                                            |
| 550 | 4.3  | 8.2  | 3  | 0.61  | 0.39 | tr B9SS35 B9SS35_RICCO | Argininosuccinate synthase, putative                |
| 552 | 4.28 | 9.2  | 4  | 0.13  | 0.25 | tr Q5PYQ3 Q5PYQ3_MANES | Glycerophosphodiester phosphodiesterase             |
| 556 | 4.24 | 7.6  | 3  | 0.61  | 0.68 | tr B9SL55 B9SL55_RICCO | DNA-binding protein smubp-2                         |
| 561 | 4.21 | 5.1  | 2  | 1.67  | 1.63 | tr B9I337 B9I337_POPTR | transportin, putative                               |
| 562 | 4.21 | 17.7 | 3  | 1.60  | 1.65 | tr B9HYZ8 B9HYZ8_POPTR | vacuolar protein sorting-associated protein         |
| 563 | 4.2  | 16   | 7  | 0.29  | 0.42 | tr B9SFR8 B9SFR8_RICCO | Aspartic proteinase, putative                       |
| 567 | 4.17 | 50.4 | 7  | 0.65  | 1.98 | sp O65812 PROF1_HEVBR  | Profilin-1                                          |
| 572 | 4.15 | 7.5  | 2  | 7.45  | 2.63 | tr Q307Z8 Q307Z8_SOLTU | ribosomal protein-like                              |

|            |      |      |    |       |       |                        |                                            |
|------------|------|------|----|-------|-------|------------------------|--------------------------------------------|
| <b>578</b> | 4.13 | 45.4 | 5  | 0.65  | 0.52  | tr D4P094 D4P094_HEVBR | Copper transport protein ATOX1             |
| <b>580</b> | 4.12 | 10.2 | 4  | 0.60  | 2.02  | tr C6TIG8 C6TIG8_SOYBN | auxin-induced protein PCNT115              |
| <b>584</b> | 4.09 | 14   | 2  | 0.64  | 1.17  | tr B9IPT2 B9IPT2_POPTR | FH protein interacting protein             |
| <b>592</b> | 4.05 | 8.7  | 2  | 1.71  | 1.69  | tr B9MUU5 B9MUU5_POPTR | Vesicle-associated protein 1               |
| <b>596</b> | 4.05 | 12.9 | 4  | 0.52  | 0.30  | tr B9SJL8 B9SJL8_RICCO | Protease C56, putative                     |
| <b>602</b> | 4.04 | 7.3  | 2  | 2.31  | 1.96  | sp O04373 ILL4_ARATH   | IAA-amino acid hydrolase ILR1-like 4       |
| <b>605</b> | 4.03 | 8.3  | 4  | 0.48  | 0.56  | tr B9SC09 B9SC09_RICCO | Putative uncharacterized protein           |
| <b>606</b> | 4.03 | 4.1  | 4  | 0.21  | 0.39  | tr Q9LUL3 Q9LUL3_ARATH | Lipase class 3 family protein              |
| <b>610</b> | 4.02 | 15.2 | 6  | 1.91  | 1.58  | tr D7SXZ2 D7SXZ2_VITVI | dehydrogenase/reductase                    |
| <b>612</b> | 4.01 | 23.6 | 3  | 0.52  | 0.27  | sp O64459 UGPA_PYRPY   | UTP-phosphate uridylyltransferase          |
| <b>613</b> | 4.01 | 13.1 | 12 | 0.24  | 0.21  | tr Q7Y237 Q7Y237_EUOEU | Chitinase                                  |
| <b>618</b> | 4    | 64.6 | 79 | 0.60  | 0.33  | tr Q6JYQ9 Q6JYQ9_HEVBR | HEV1.2                                     |
| <b>625</b> | 4    | 14.1 | 6  | 0.65  | 1.05  | tr B9ST42 B9ST42_RICCO | Pyruvate kinase                            |
| <b>628</b> | 4    | 8.4  | 3  | 0.22  | 0.22  | tr B9GFV7 B9GFV7_POPTR | TBC1 domain family member 13               |
| <b>631</b> | 4    | 29.9 | 2  | 3.05  | 2.04  | tr F4YFE3 F4YFE3_CAMSI | Cytochrome b5                              |
| <b>634</b> | 4    | 5.7  | 2  | 0.46  | 1.44  | tr C6TGB0 C6TGB0_SOYBN | Putative uncharacterized protein           |
| <b>643</b> | 4    | 32.8 | 4  | 0.30  | 1.26  | tr D9IZZ6 D9IZZ6_HEVBR | Translation machinery-associated protein 7 |
| <b>648</b> | 3.96 | 10.8 | 2  | 0.22  | 0.59  | tr D7SIZ7 D7SIZ7_VITVI | 20 kDa chaperonin, chloroplastic           |
| <b>650</b> | 3.95 | 16.5 | 3  | 11.48 | 2.11  | tr D1ML39 D1ML39_9ROSI | Ribosomal protein                          |
| <b>651</b> | 3.94 | 9.3  | 3  | 3.40  | 2.06  | tr B9RDG1 B9RDG1_RICCO | Calcium lipid binding protein              |
| <b>653</b> | 3.92 | 8.3  | 4  | 0.13  | 0.70  | sp Q9FK25 OMT1_ARATH   | Quercetin 3-O-methyltransferase 1          |
| <b>666</b> | 3.83 | 44.6 | 37 | 0.24  | 0.99  | tr D7U1A1 D7U1A1_VITVI | glyceraldehyde-3-phosphate dehydrogenase   |
| <b>668</b> | 3.82 | 13.7 | 9  | 0.50  | 1.13  | tr Q8GZD8 Q8GZD8_SOLLC | aminopeptidase preprotein                  |
| <b>680</b> | 3.74 | 14.4 | 4  | 9.46  | 2.53  | tr E0CPI5 E0CPI5_VITVI | hydrolase domain-containing protein        |
| <b>683</b> | 3.7  | 26.6 | 8  | 3.31  | 2.04  | tr D7SN69 D7SN69_VITVI | bifunctional polymyxin resistance protein  |
| <b>687</b> | 3.68 | 21.5 | 2  | 1.69  | 1.53  | tr B8Y6I1 B8Y6I1_HEVBR | V-type proton ATPase subunit F             |
| <b>688</b> | 3.66 | 8    | 3  | 0.54  | 0.47  | tr E0CRW7 E0CRW7_VITVI | argininosuccinate lyase                    |
| <b>692</b> | 3.63 | 7    | 3  | 0.09  | 0.19  | tr B9RXB8 B9RXB8_RICCO | Homogentisate 1,2-dioxygenase              |
| <b>694</b> | 3.61 | 8.2  | 2  | 0.48  | 0.67  | tr B9SQS5 B9SQS5_RICCO | 3-isopropylmalate dehydratase              |
| <b>700</b> | 3.54 | 15.2 | 5  | 0.61  | 0.87  | tr B9RAR0 B9RAR0_RICCO | Protein-L-isoaspartate O-methyltransferase |
| <b>703</b> | 3.53 | 19.8 | 3  | 1.50  | 1.34  | tr D5JG84 D5JG84_9ROSI | Heat shock protein 17.5 class II           |
| <b>704</b> | 3.52 | 3    | 2  | 0.10  | 0.35  | tr D7T494 D7T494_VITVI | Putative uncharacterized protein           |
| <b>708</b> | 3.46 | 6.5  | 4  | 16.00 | 3.72  | tr B9T139 B9T139_RICCO | Hydrolase                                  |
| <b>710</b> | 3.44 | 17.3 | 6  | 0.55  | 0.61  | tr B9N432 B9N432_POPTR | ATP-citrate synthase, putative             |
| <b>713</b> | 3.44 | 7.6  | 2  | 12.13 | 2.13  | tr B9RWM3 B9RWM3_RICCO | Potassium channel beta, putative           |
| <b>714</b> | 3.43 | 11.2 | 3  | 0.59  | 0.68  | tr Q5EBY6 Q5EBY6_EUPCH | Aldehyde dehydrogenase family 7            |
| <b>716</b> | 3.43 | 20.1 | 7  | 0.23  | 0.48  | tr B9R7W5 B9R7W5_RICCO | Isoflavone reductase, putative             |
| <b>717</b> | 3.42 | 10.9 | 7  | 0.61  | 0.79  | tr B9GZ19 B9GZ19_POPTR | glycine-tRNA ligase 1                      |
| <b>718</b> | 3.42 | 20.4 | 2  | 2.07  | 0.91  | tr B9RH67 B9RH67_RICCO | 40S ribosomal protein S25-1                |
| <b>720</b> | 3.4  | 15.1 | 26 | 1.63  | 1.20  | tr A5ACP0 A5ACP0_VITVI | clathrin heavy chain 1                     |
| <b>723</b> | 3.4  | 100  | 4  | 0.11  | 0.58  | sp P86104 UP01_VITRO   | Unknown protein 1                          |
| <b>729</b> | 3.37 | 16.8 | 19 | 0.62  | 1.09  | tr B9RQ33 B9RQ33_RICCO | 5-methyl-homocysteine methyltransferase    |
| <b>732</b> | 3.37 | 8.5  | 2  | 4.02  | 11.62 | tr B9T676 B9T676_RICCO | Catalytic, putative                        |

|            |      |      |    |      |      |                        |                                       |
|------------|------|------|----|------|------|------------------------|---------------------------------------|
| <b>735</b> | 3.34 | 3.4  | 2  | 1.71 | 1.29 | tr D7T8E1 D7T8E1_VITVI | Phagocytic receptor 1b                |
| <b>738</b> | 3.33 | 6.1  | 2  | 0.43 | 0.25 | tr B9RLT7 B9RLT7_RICCO | Dimethylaniline monooxygenase         |
| <b>740</b> | 3.31 | 6.8  | 6  | 0.19 | 0.38 | tr Q8VZH2 Q8VZH2_ARATH | Aminopeptidase M1                     |
| <b>743</b> | 3.29 | 2.3  | 2  | 2.11 | 1.19 | tr B9SDH3 B9SDH3_RICCO | Cytochrome P450, putative             |
| <b>744</b> | 3.29 | 6.8  | 2  | 1.61 | 2.01 | tr F6HIY1 F6HIY1_VITVI | cytochrome b5 reductase 1-like        |
| <b>746</b> | 3.29 | 11.3 | 2  | 0.62 | 0.41 | tr Q38HT5 Q38HT5_SOLTU | 40S ribosomal protein S23             |
| <b>757</b> | 3.24 | 7.1  | 2  | 1.94 | 2.65 | tr A9PDL9 A9PDL9_POPTR | Very-long-chain enoyl-CoA reductase   |
| <b>758</b> | 3.22 | 6.4  | 3  | 0.52 | 1.67 | tr B9RRB9 B9RRB9_RICCO | Suppression of tumorigenicity         |
| <b>759</b> | 3.22 | 7.1  | 2  | 2.49 | 1.56 | tr B9SEA1 B9SEA1_RICCO | Peroxidase 12, putative               |
| <b>760</b> | 3.21 | 25   | 21 | 1.63 | 1.51 | tr F6H4T7 F6H4T7_VITVI | elongation factor 2-like              |
| <b>763</b> | 3.19 | 5.9  | 2  | 0.58 | 1.02 | tr E9M776 E9M776_HEVBR | Cinnamoyl-CoA reductase               |
| <b>771</b> | 3.09 | 5.7  | 2  | 0.58 | 0.52 | tr B0LUS9 B0LUS9_TOBAC | Multicopy suppressor                  |
| <b>772</b> | 3.06 | 5.5  | 3  | 0.13 | 0.57 | tr B9IEZ0 B9IEZ0_POPTR | ubiquitin domain-containing protein   |
| <b>774</b> | 3.05 | 2.5  | 2  | 1.96 | 2.06 | tr B9SYU2 B9SYU2_RICCO | Vacuolar sorting protein              |
| <b>778</b> | 3.04 | 4.2  | 2  | 0.19 | 0.54 | tr A9PEK1 A9PEK1_POPTR | Phosphoglycerate dehydrogenase        |
| <b>779</b> | 3.03 | 8.6  | 6  | 0.27 | 0.32 | tr D7MNN8 D7MNN8_ARALL | Sucrose synthase                      |
| <b>780</b> | 3.03 | 2.4  | 2  | 2.01 | 1.67 | tr B9HPP7 B9HPP7_POPTR | Calcium ATPase                        |
| <b>782</b> | 3.02 | 6.4  | 2  | 0.54 | 0.27 | sp Q9M9E9 SRK2C_ARATH  | Serine/threonine-protein kinase       |
| <b>783</b> | 3.02 | 4.5  | 2  | 0.62 | 0.38 | tr B9T5L2 B9T5L2_RICCO | Nonsense-mediated mRNA decay protein  |
| <b>784</b> | 3    | 15.9 | 4  | 1.64 | 1.77 | tr B9RTH6 B9RTH6_RICCO | ADP-ribosylation factor               |
| <b>789</b> | 2.98 | 10.3 | 3  | 0.10 | 0.14 | tr B9R730 B9R730_RICCO | Putative uncharacterized protein      |
| <b>790</b> | 2.98 | 3.6  | 3  | 0.48 | 1.16 | sp Q2XPU6 CAS1_RICCO   | Cycloartenol synthase                 |
| <b>794</b> | 2.95 | 23   | 10 | 0.24 | 0.19 | tr F6H7L5 F6H7L5_VITVI | Lactoylglutathione lyase              |
| <b>799</b> | 2.93 | 2.2  | 2  | 0.55 | 2.21 | tr A5BG74 A5BG74_VITVI | protein argonaute 4A-like             |
| <b>801</b> | 2.92 | 26   | 10 | 1.60 | 0.96 | sp Q9AT56 METK1_ELAUM  | S-adenosylmethionine synthase 1       |
| <b>807</b> | 2.9  | 13.4 | 3  | 1.51 | 0.33 | tr B9SS61 B9SS61_RICCO | 60S ribosomal protein L14             |
| <b>808</b> | 2.9  | 25.2 | 2  | 0.08 | 0.30 | tr B9IJS4 B9IJS4_POPTR | Thioredoxin                           |
| <b>813</b> | 2.87 | 19.8 | 4  | 1.77 | 2.51 | tr B9IEB2 B9IEB2_POPTR | Ras-related protein RABA6b            |
| <b>817</b> | 2.85 | 65.7 | 63 | 0.62 | 0.34 | sp P02877 HEVE_HEVBR   | Pro-hevein OS=Hevea brasiliensis      |
| <b>819</b> | 2.84 | 14.3 | 5  | 1.96 | 1.18 | tr Q66PF9 Q66PF9_PEA   | Monodehydroascorbate reductase I      |
| <b>825</b> | 2.81 | 11.8 | 6  | 1.72 | 1.18 | tr F6HHF5 F6HHF5_VITVI | eukaryotic initiation factor 4A-3     |
| <b>827</b> | 2.81 | 7.7  | 2  | 0.31 | 0.35 | tr B9IAZ4 B9IAZ4_POPTR | Ribosomal protein L5A, 60S            |
| <b>828</b> | 2.81 | 13.3 | 2  | 1.75 | 0.48 | tr C6SZQ3 C6SZQ3_SOYBN | 60S ribosomal protein L23A            |
| <b>832</b> | 2.78 | 3.5  | 2  | 2.21 | 1.97 | tr B9GSW4 B9GSW4_POPTR | Long chain acyl-CoA synthetase 1      |
| <b>835</b> | 2.77 | 8.1  | 2  | 1.51 | 1.02 | tr B9T7A3 B9T7A3_RICCO | Ubiquitin carboxyl-terminal hydrolase |
| <b>838</b> | 2.76 | 6    | 2  | 0.63 | 1.29 | tr D7LLA4 D7LLA4_ARALL | Tubulin beta-7 chain                  |
| <b>839</b> | 2.75 | 6.8  | 4  | 1.77 | 0.98 | tr B9RSG5 B9RSG5_RICCO | Dipeptidyl peptidase IV               |
| <b>840</b> | 2.75 | 16.7 | 3  | 0.38 | 1.15 | tr B9S069 B9S069_RICCO | Glutathione-s-transferase theta       |
| <b>844</b> | 2.72 | 16.4 | 4  | 0.61 | 0.51 | tr B9S7R8 B9S7R8_RICCO | Pyridoxine kinase, putative           |
| <b>845</b> | 2.72 | 8.4  | 5  | 0.21 | 0.18 | tr B9H6S4 B9H6S4_POPTR | rhamnogalacturonate lyase             |
| <b>864</b> | 2.65 | 9.4  | 4  | 0.62 | 0.98 | tr B9RZ84 B9RZ84_RICCO | Glutaredoxin, grx, putative           |
| <b>868</b> | 2.65 | 23.5 | 3  | 0.54 | 0.47 | tr D7TK03 D7TK03_VITVI | programmed cell death protein 5       |
| <b>869</b> | 2.64 | 5.7  | 3  | 0.30 | 0.34 | tr A5BDT4 A5BDT4_VITVI | 14 kDa zinc-binding protein           |
| <b>870</b> | 2.64 | 7.2  | 2  | 0.53 | 2.38 | sp B9SL58 PURA2_RICCO  | Adenylosuccinate synthetase 2         |

|             |      |      |    |      |      |                        |                                             |
|-------------|------|------|----|------|------|------------------------|---------------------------------------------|
| <b>871</b>  | 2.63 | 11   | 3  | 2.68 | 0.54 | tr B9SGS2 B9SGS2_RICCO | 60S ribosomal protein L4                    |
| <b>879</b>  | 2.61 | 30.2 | 23 | 0.30 | 1.01 | tr B9H5X2 B9H5X2_POPTR | Phosphofructokinase                         |
| <b>885</b>  | 2.61 | 15.3 | 3  | 1.77 | 0.79 | tr E9JFW4 E9JFW4_9ROSI | Thioredoxin                                 |
| <b>886</b>  | 2.6  | 8.9  | 2  | 0.64 | 0.97 | tr A5BVN4 A5BVN4_VITVI | Nucleoside diphosphate kinase               |
| <b>888</b>  | 2.59 | 10   | 2  | 7.31 | 2.19 | tr B9RTJ5 B9RTJ5_RICCO | Coated vesicle membrane protein             |
| <b>900</b>  | 2.53 | 15.9 | 2  | 0.47 | 0.24 | tr B9MT66 B9MT66_POPTR | Glutathione transferase GSTL3               |
| <b>903</b>  | 2.53 | 11.9 | 3  | 0.46 | 0.22 | tr Q9S7R3 Q9S7R3_ARATH | 177 protein                                 |
| <b>904</b>  | 2.53 | 7.2  | 2  | 2.36 | 1.50 | tr G1ED19 G1ED19_GOSHI | Protein disulfide isomerase                 |
| <b>905</b>  | 2.52 | 9.1  | 3  | 0.35 | 0.16 | tr O49235 O49235_SOYBN | Glutathione S-transferase                   |
| <b>907</b>  | 2.5  | 19.1 | 10 | 0.59 | 1.07 | tr B7FKU7 B7FKU7_MEDTR | Cysteine synthase                           |
| <b>914</b>  | 2.48 | 3.5  | 2  | 1.89 | 1.96 | tr D7KNJ9 D7KNJ9_ARALL | trehalose-phosphate synthase                |
| <b>921</b>  | 2.45 | 6.2  | 3  | 0.27 | 0.99 | tr B9SGK0 B9SGK0_RICCO | Adaptin ear-binding coat-associated protein |
| <b>929</b>  | 2.41 | 6.6  | 2  | 0.61 | 0.29 | tr B9T8C2 B9T8C2_RICCO | Putative uncharacterized protein            |
| <b>938</b>  | 2.37 | 15.9 | 2  | 2.27 | 2.11 | tr D6BRD9 D6BRD9_9ROSI | Glutathione-s-transferase theta             |
| <b>944</b>  | 2.35 | 28.2 | 20 | 0.52 | 0.22 | tr D7LJ40 D7LJ40_ARALL | Fructose-bisphosphate aldolase              |
| <b>945</b>  | 2.35 | 5.9  | 3  | 0.20 | 0.47 | tr B9ICR4 B9ICR4_POPTR | coatomer subunit delta                      |
| <b>948</b>  | 2.34 | 8.2  | 4  | 0.40 | 0.54 | tr B9H0Q2 B9H0Q2_POPTR | Adenylyl cyclase-associated protein         |
| <b>949</b>  | 2.34 | 6.7  | 5  | 0.09 | 0.37 | sp P51074 ANX4_FRAAN   | Annexin-like protein RJ4                    |
| <b>952</b>  | 2.33 | 23.5 | 18 | 0.47 | 0.33 | tr Q2WFK8 Q2WFK8_9ASTR | Fructose-bisphosphate aldolase              |
| <b>975</b>  | 2.28 | 14.7 | 2  | 1.77 | 2.07 | tr B9H5H4 B9H5H4_POPTR | dolichol-phosphate mannosyltransferase      |
| <b>981</b>  | 2.26 | 9.5  | 3  | 0.61 | 1.05 | tr B9H739 B9H739_POPTR | Predicted protein                           |
| <b>982</b>  | 2.25 | 11.6 | 13 | 0.29 | 0.24 | tr Q533V0 Q533V0_FRAAN | Phospholipase D                             |
| <b>990</b>  | 2.23 | 7.3  | 5  | 0.59 | 1.25 | tr B9ILT5 B9ILT5_POPTR | Malic enzyme                                |
| <b>993</b>  | 2.23 | 6.9  | 2  | 2.91 | 0.86 | tr B9RA70 B9RA70_RICCO | Signal recognition particle 68 kDa protein  |
| <b>1002</b> | 2.2  | 5.2  | 2  | 6.19 | 3.09 | tr B9SD61 B9SD61_RICCO | Hydrolase; Leukotriene hydrolase            |
| <b>1008</b> | 2.19 | 5.9  | 2  | 5.06 | 1.54 | tr B7FM77 B7FM77_MEDTR | Alanine aminotransferase                    |
| <b>1016</b> | 2.18 | 33.2 | 7  | 0.35 | 1.21 | sp Q40521 RB11B_TOBAC  | Ras-related protein Rab11B                  |
| <b>1019</b> | 2.17 | 12.2 | 2  | 1.67 | 0.30 | tr A5BV59 A5BV59_VITVI | guanine nucleotide-binding protein          |
| <b>1026</b> | 2.15 | 3.4  | 2  | 2.38 | 1.60 | tr B9T6N8 B9T6N8_RICCO | Indole-3-acetic acid-amido synthetase       |
| <b>1029</b> | 2.15 | 11.9 | 2  | 1.66 | 1.74 | tr B9N7F9 B9N7F9_POPTR | Vesicle transport protein-lik               |
| <b>1030</b> | 2.14 | 10   | 5  | 0.27 | 0.38 | tr A9PCM5 A9PCM5_POPTR | Proteasome subunit alpha type               |
| <b>1037</b> | 2.13 | 18.7 | 8  | 0.28 | 0.22 | tr B9GTA1 B9GTA1_POPTR | Aminoacyl-tRNA synthetase                   |
| <b>1044</b> | 2.12 | 6.9  | 3  | 0.60 | 1.09 | tr D7TMA3 D7TMA3_VITVI | Chorismate synthase                         |
| <b>1049</b> | 2.12 | 3.8  | 5  | 0.47 | 1.01 | tr F6HLA1 F6HLA1_VITVI | pantothenate kinase                         |
| <b>1051</b> | 2.11 | 4.7  | 4  | 0.60 | 0.93 | tr A9Z0V7 A9Z0V7_ROSDA | Carotenoid cleavage dioxygenase 1           |
| <b>1059</b> | 2.1  | 11.6 | 3  | 0.56 | 0.75 | tr B9R8F0 B9R8F0_RICCO | Nucleoredoxin, putative                     |
| <b>1062</b> | 2.09 | 11.2 | 2  | 0.65 | 1.15 | tr B9SS56 B9SS56_RICCO | Structural molecule, putative               |
| <b>1065</b> | 2.08 | 8.7  | 4  | 1.66 | 2.75 | tr Q6TKR0 Q6TKR0_TOBAC | Ribosomal protein L3A                       |
| <b>1066</b> | 2.08 | 8.1  | 4  | 2.21 | 0.92 | tr Q94KK8 Q94KK8_TOBAC | Glutamate decarboxylase isozyme 3           |
| <b>1067</b> | 2.08 | 4.6  | 5  | 0.59 | 0.41 | tr F8WL79 F8WL79_CITUN | Aminopeptidase                              |
| <b>1071</b> | 2.07 | 14.8 | 13 | 0.16 | 0.28 | tr D7SIX7 D7SIX7_VITVI | serine/threonine-protein phosphatase        |
| <b>1072</b> | 2.07 | 6.5  | 4  | 0.42 | 1.36 | tr B3TZ27 B3TZ27_RICCO | Long-chain acyl-CoA synthetase 4            |
| <b>1081</b> | 2.06 | 27.4 | 19 | 0.28 | 0.62 | tr F6HZK0 F6HZK0_VITVI | Malate dehydrogenase                        |
| <b>1082</b> | 2.06 | 8    | 2  | 2.05 | 1.06 | tr B9IF79 B9IF79_POPTR | Aspartyl aminopeptidase                     |

|             |      |      |    |       |      |                        |                                                      |
|-------------|------|------|----|-------|------|------------------------|------------------------------------------------------|
| <b>1085</b> | 2.06 | 7.6  | 4  | 1.58  | 1.04 | tr Q9M835 Q9M835_ARATH | L-allo-threonine aldolase, putative                  |
| <b>1120</b> | 2.03 | 10.2 | 8  | 0.60  | 4.17 | tr D1MAF2 D1MAF2_SOLLC | Exportin-1                                           |
| <b>1121</b> | 2.03 | 25.7 | 7  | 2.13  | 0.82 | tr B9SR17 B9SR17_RICCO | Glucose 4-6-dehydratase, putative                    |
| <b>1130</b> | 2.03 | 23.3 | 4  | 0.42  | 0.88 | tr Q8LCK3 Q8LCK3_ARATH | copper transport protein                             |
| <b>1136</b> | 2.02 | 3    | 2  | 0.51  | 1.13 | tr Q9SJT7 Q9SJT7_ARATH | V-type H <sup>+</sup> -transporting ATPase subunit I |
| <b>1137</b> | 2.02 | 26.2 | 8  | 0.61  | 0.53 | tr B9IF97 B9IF97_POPTR | Translation elongation factor                        |
| <b>1155</b> | 2.01 | 8.5  | 5  | 11.07 | 3.94 | tr B9HA87 B9HA87_POPTR | Galactinol-sucrose galactosyltransferase             |
| <b>1157</b> | 2.01 | 3.8  | 2  | 1.60  | 1.63 | tr D7SS21 D7SS21_VITVI | Pyrophosphate-energized membrane proton              |
| <b>1171</b> | 2    | 33.9 | 18 | 0.61  | 0.22 | tr C0LDX2 C0LDX2_9ROSI | Glyceraldehyde-3-pho- dehydrogenase                  |
| <b>1172</b> | 2    | 73.3 | 18 | 0.62  | 1.21 | tr A9P8Q6 A9P8Q6_POPTR | Ras-related protein Rab7                             |
| <b>1173</b> | 2    | 40.9 | 17 | 3.22  | 1.02 | tr Q9M5X2 Q9M5X2_EUPES | Heat shock protein 80                                |
| <b>1179</b> | 2    | 11.3 | 10 | 1.58  | 0.71 | tr B9HRP1 B9HRP1_POPTR | Coatomer subunit gamma                               |
| <b>1180</b> | 2    | 37   | 8  | 0.60  | 0.29 | tr D5K0Z8 D5K0Z8_9FABA | Actin-like protein                                   |
| <b>1186</b> | 2    | 8.5  | 8  | 0.60  | 0.25 | tr B9I7J3 B9I7J3_POPTR | Luminal-binding protein 5                            |
| <b>1188</b> | 2    | 45.1 | 5  | 0.65  | 0.53 | tr B2X0F6 B2X0F6_9ROSI | Glyceraldehyde 3-phosphate dehydrogenase             |
| <b>1191</b> | 2    | 2.9  | 3  | 2.58  | 1.98 | tr F6GZ28 F6GZ28_VITVI | Myosin-Vb-like                                       |
| <b>1195</b> | 2    | 11.3 | 3  | 2.05  | 1.05 | tr D7U7P5 D7U7P5_VITVI | Fructokinase-5-like                                  |
| <b>1196</b> | 2    | 5.8  | 4  | 0.65  | 0.53 | tr C9EA44 C9EA44_CARPA | Ripening-reduced arabinofuranosidase                 |
| <b>1203</b> | 2    | 16.3 | 4  | 1.85  | 1.08 | tr C6TED4 C6TED4_SOYBN | Ras-related protein RHN1-like                        |
| <b>1206</b> | 2    | 6.1  | 2  | 0.19  | 0.23 | tr A9P745 A9P745_HELAN | Enolase                                              |
| <b>1207</b> | 2    | 11.2 | 5  | 1.51  | 0.72 | tr B9RFA8 B9RFA8_RICCO | Rubber elongation factor protein                     |
| <b>1210</b> | 2    | 6.7  | 2  | 5.40  | 1.25 | tr Q8LA96 Q8LA96_ARATH | RNA recognition motif-containing protein             |
| <b>1211</b> | 2    | 5.2  | 2  | 0.20  | 0.51 | tr Q40581 Q40581_TOBAC | GTP-binding protein                                  |
| <b>1214</b> | 2    | 6.3  | 4  | 0.48  | 1.01 | tr B9GK93 B9GK93_POPTR | FAS-associated factor 2                              |
| <b>1225</b> | 2    | 3.7  | 3  | 0.66  | 0.63 | tr A5AEX6 A5AEX6_VITVI | carboxymethylenebutenolidase                         |
| <b>1228</b> | 2    | 16.8 | 2  | 0.61  | 0.52 | tr B9H401 B9H401_POPTR | Prefoldin subuni                                     |
| <b>1231</b> | 2    | 8.2  | 3  | 2.29  | 3.08 | tr D7SZI9 D7SZI9_VITVI | 60S ribosomal protein                                |
| <b>1236</b> | 2    | 6    | 2  | 0.52  | 0.37 | tr B9HQZ2 B9HQZ2_POPTR | chitinase 1                                          |
| <b>1247</b> | 2    | 8.2  | 2  | 0.34  | 0.82 | tr B9SYE9 B9SYE9_RICCO | ADP-ribosylation factor, putative                    |
| <b>1275</b> | 2    | 9.2  | 2  | 0.61  | 1.16 | tr B9S7V3 B9S7V3_RICCO | V-type proton ATPase subunit F                       |
| <b>1278</b> | 2    | 27.6 | 6  | 0.39  | 0.95 | tr A9PBT2 A9PBT2_POPTR | nuclear transport factor 2 isoform 1                 |
| <b>1281</b> | 2    | 29.8 | 6  | 0.51  | 1.43 | tr A9PE14 A9PE14_POPTR | nuclear transport factor                             |
| <b>1318</b> | 2    | 8.9  | 5  | 0.52  | 0.12 | tr F6HF70 F6HF70_VITVI | Putative uncharacterized protein                     |
| <b>1320</b> | 2    | 16.7 | 2  | 2.07  | 1.03 | tr B9T0W0 B9T0W0_RICCO | heat shock factor-binding protein                    |
| <b>1336</b> | 1.95 | 11.3 | 4  | 1.67  | 4.33 | tr B9SXV3 B9SXV3_RICCO | Calcium lipid binding protein                        |
| <b>1337</b> | 1.94 | 4.5  | 2  | 1.96  | 1.54 | tr F6HCT7 F6HCT7_VITVI | heat shock 70 kDa protein                            |
| <b>1341</b> | 1.92 | 11.2 | 2  | 0.62  | 0.58 | tr B9N560 B9N560_POPTR | Predicted protein                                    |
| <b>1346</b> | 1.91 | 5.7  | 2  | 1.71  | 3.28 | tr B9R7B8 B9R7B8_RICCO | Serine/threonine-protein kinase                      |
| <b>1348</b> | 1.89 | 10.3 | 3  | 0.33  | 1.16 | tr B9S119 B9S119_RICCO | Putative uncharacterized protein                     |
| <b>1353</b> | 1.87 | 7.1  | 4  | 0.45  | 0.51 | tr Q949H3 Q949H3_HEVBR | Chitinase, class I                                   |
| <b>1355</b> | 1.86 | 22   | 19 | 2.75  | 0.78 | tr B9H023 B9H023_POPTR | GTP-binding protein                                  |
| <b>1387</b> | 1.77 | 77.3 | 20 | 0.24  | 0.82 | tr B7FLK9 B7FLK9_MEDTR | ubiquitin 11                                         |
| <b>1404</b> | 1.7  | 7    | 2  | 2.94  | 3.98 | tr B9RGW6 B9RGW6_RICCO | Conserved hypothetical protein                       |
| <b>1407</b> | 1.69 | 1.5  | 2  | 0.59  | 0.56 | tr B9I2G0 B9I2G0_POPTR | Predicted protein                                    |

|             |      |      |    |      |      |                        |                                     |
|-------------|------|------|----|------|------|------------------------|-------------------------------------|
| <b>1418</b> | 1.65 | 7.5  | 3  | 0.10 | 0.21 | tr B9HBL6 B9HBL6_POPTR | aspartate-tRNA ligase, cytoplasmic  |
| <b>1426</b> | 1.61 | 8.3  | 3  | 0.17 | 0.93 | tr F6HI13 F6HI13_VITVI | random slug protein 5 isoform 2     |
| <b>1434</b> | 1.58 | 32.5 | 19 | 0.58 | 0.73 | tr Q6QLW8 Q6QLW8_HEVBR | HMG-CoA synthase 2                  |
| <b>1437</b> | 1.57 | 5.2  | 2  | 3.73 | 7.78 | tr B9IEB9 B9IEB9_POPTR | methyl transferase                  |
| <b>1453</b> | 1.53 | 5.9  | 2  | 0.64 | 0.51 | tr Q1W6C5 Q1W6C5_9CARY | chitinase Class Ib                  |
| <b>1459</b> | 1.51 | 8.9  | 4  | 0.60 | 0.56 | tr B9SBH8 B9SBH8_RICCO | Dynamamin, putative                 |
| <b>1464</b> | 1.5  | 7.2  | 3  | 0.60 | 0.94 | tr A8IKE1 A8IKE1_SOYBN | Alanine aminotransferase 1          |
| <b>1467</b> | 1.49 | 20.7 | 6  | 0.52 | 0.24 | tr Q8LBD5 Q8LBD5_ARATH | L-lactate dehydrogenase             |
| <b>1479</b> | 1.43 | 14.7 | 3  | 0.64 | 0.79 | tr C6TB50 C6TB50_SOYBN | S-formylglutathione hydrolase-like  |
| <b>1487</b> | 1.4  | 5.1  | 2  | 2.25 | 1.82 | tr E0CR92 E0CR92_VITVI | Aminotransferase YbdL-like          |
| <b>1494</b> | 1.39 | 6.5  | 2  | 0.13 | 0.29 | tr F6H2P8 F6H2P8_VITVI | Putative uncharacterized protein    |
| <b>1523</b> | 1.31 | 3.1  | 2  | 2.11 | 1.52 | tr C6TNV4 C6TNV4_SOYBN | succinyl-CoA ligase subunit alpha-1 |

**Note:**

<sup>a</sup>The protein number (I-) obtained from the iTRAQ experiments.

<sup>b</sup>The Unused Score produced by the ProteinPilot™ Software.

<sup>c</sup>The percent of sequence coverage value for the matched peptides with higher than 95% confidence.

<sup>d</sup>The number of matched matched peptides with higher than 95% confidence.

<sup>e</sup>The changed ration of target protein in the E-3 and D-3 rubber latex identified by iTRAQ.

<sup>f</sup>Accession numbers and plant species in the Swiss-Prot Database.

**Supplementary Table S4** MS identification of the 59 phosphorlated latex proteins

| <b>Spot P-<sup>a</sup></b> | <b>Changed ratio<sup>b</sup><br/>E3/D3:E3/D0:D3/D0</b> | <b>Thero.<sup>c</sup><br/>pI/Mr</b> | <b>M.S.<sup>d</sup><br/>Score</b> | <b>NCBI<br/>No.<sup>e</sup></b> | <b>Plant<br/>species</b> | <b>Protein<br/>name</b>                  |
|----------------------------|--------------------------------------------------------|-------------------------------------|-----------------------------------|---------------------------------|--------------------------|------------------------------------------|
| <b>P1</b>                  | 0.26: 0.36: 2.03                                       | 5.11/71.6                           | 97                                | 123650                          | <i>P. hybrida</i>        | Heat shock cognate 70 kDa protein        |
| <b>P2</b>                  | 3.75: 7.78: 2.48                                       | 5.52/61.4                           | [54]                              | 249262                          | <i>M. esculenta</i>      | linamarase                               |
| <b>P3</b>                  | 0.46: 0.56: 0.92                                       | 4.54/46.1                           | [112]                             | 224100473                       | <i>P. trichocarpa</i>    | predicted protein                        |
| <b>P4</b>                  | 1.31: 0.57: 0.45                                       | 5.52/61.4                           | [56]                              | 249262                          | <i>M. esculenta</i>      | linamarase                               |
| <b>P5</b>                  | 4.48: 2.82: 0.48                                       | 4.61/12.8                           | [502]                             | 29170601                        | <i>H. brasiliensis</i>   | Small rubber particle protein            |
| <b>P6</b>                  | 15.04: 5.74: 0.21                                      | 4.61/12.8                           | [429]                             | 29170601                        | <i>H. brasiliensis</i>   | Small rubber particle protein            |
| <b>P7</b>                  | 0.46: 1.01: 1.77                                       | 5.28/47.1                           | [75]                              | 224071449                       | <i>P. trichocarpa</i>    | phospholipase A                          |
| <b>P8</b>                  | 5.26: 7.09: 2.01                                       | 5.31/42.0                           | [519]                             | 32186890                        | <i>G. hirsutum</i>       | actin                                    |
| <b>P9</b>                  | 0.28: 0.64: 3.21                                       | 4.8/22.3                            | [384]                             | 14423933                        | <i>H. brasiliensis</i>   | Small rubber particle protein            |
| <b>P10</b>                 | 0.36: 0.43: 1.30                                       | 5.28/47.1                           | [71]                              | 224071449                       | <i>P. trichocarpa</i>    | phospholipase A                          |
| <b>P11</b>                 | 1.13: 0.45: 0.62                                       | 5.28/47.1                           | [52]                              | 224071449                       | <i>P. trichocarpa</i>    | phospholipase A                          |
| <b>P12</b>                 | 0.47: 0.37: 0.46                                       | 5.28/47.1                           | [106]                             | 224071449                       | <i>P. trichocarpa</i>    | phospholipase A                          |
| <b>P13</b>                 | 1.95: 2.15: 1.10                                       | 5.49/50.3                           | [51]                              | 1550740                         | <i>A. thaliana</i>       | GDP-associated inhibitor                 |
| <b>P14</b>                 | 0.37: 0.37: 1.67                                       | 6.5/32.1                            | [144]                             | 255552291                       | <i>R. communis</i>       | short chain dehydrogenase, putative      |
| <b>P15</b>                 | 0.49: 0.38: 0.87                                       | 6.56/39.2                           | [174]                             | 218157                          | <i>O. sativa</i>         | cytoplasmic aldolase                     |
| <b>P16</b>                 | 2.47: 0.73: 0.38                                       | 6.56/39.2                           | [125]                             | 218157                          | <i>O. sativa</i>         | cytoplasmic aldolase                     |
| <b>P17</b>                 | 4.66: 15.17: 4.53                                      | 4.8/22.3                            | [171]                             | 14423933                        | <i>H. brasiliensis</i>   | Small rubber particle protein            |
| <b>P18</b>                 | 1.15: 2.32: 3.97                                       | 8.42/35.9                           | [74]                              | 118489480                       | <i>P. trichocarpa</i>    | unknown                                  |
| <b>P19</b>                 | 3.29: 3.33: 1.07                                       | 5.04/14.7                           | [341]                             | 132270                          | <i>H. brasiliensis</i>   | Rubber elongation factor protein         |
| <b>P20</b>                 | 2.81: 2.11: 0.71                                       | 5.04/14.7                           | [597]                             | 132270                          | <i>H. brasiliensis</i>   | Rubber elongation factor protein         |
| <b>P21</b>                 | 2.33: 1.87: 0.72                                       | 5.04/14.7                           | [672]                             | 132270                          | <i>H. brasiliensis</i>   | Rubber elongation factor protein         |
| <b>P22</b>                 | 0.18: 0.41: 2.34                                       | 4.94/80.3                           | [197]                             | 38154482                        | <i>N. benthamiana</i>    | Hsp 90-1                                 |
| <b>P23</b>                 | 1.42: 3.24: 2.76                                       | 4.95/81.1                           | [126]                             | 1708314                         | <i>I. nil</i>            | Heat shock protein 83                    |
| <b>P24</b>                 | 2.38: 2.65: 1.37                                       | 5.07/71.1                           | [136]                             | 20559                           | <i>P. hybrida</i>        | hsp70 (AA 6 - 651)                       |
| <b>P25</b>                 | 1.55: 2.67: 2.61                                       | 5.08/59.1                           | [118]                             | 255566038                       | <i>R. communis</i>       | Phospholipase C 3 precursor              |
| <b>P26</b>                 | 2.10: 3.98: 1.61                                       | 5.01/46.4                           | [80]                              | 4235430                         | <i>H. brasiliensis</i>   | latex-abundant protein                   |
| <b>P27</b>                 | 0.61: 3.71: 6.87                                       | 5.21/59.4                           | [53]                              | 297833008                       | <i>A. lyrata</i>         | phosphoesterase family protein           |
| <b>P28</b>                 | 2.70: 1.93: 0.37                                       | 5.23/62.1                           | [108]                             | 226530579                       | <i>Z. mays</i>           | uncharacterized protein                  |
| <b>P29</b>                 | 2.39: 0.75: 0.41                                       | 6.75/59.3                           | [133]                             | 149938954                       | <i>A. chinensis</i>      | G6PD1; glucose-6-phosphate dehydrogenase |
| <b>P30</b>                 | 1.04: 2.15: 3.11                                       | 6.26/38.2                           | [53]                              | 226493285                       | <i>Z. mays</i>           | flavonol 4-sulfotransferase              |
| <b>P31</b>                 | 0.51: 0.31: 1.34                                       | 5.28/47.1                           | [104]                             | 224071449                       | <i>P. trichocarpa</i>    | phospholipase A                          |
| <b>P32</b>                 | 0.93: 1.36: 2.07                                       | 5.0/43.0                            | [219]                             | 1916805                         | <i>H. brasiliensis</i>   | latex patatin homolog                    |
| <b>P33</b>                 | 0.51: 0.27: 0.41                                       | 5.0/43.1                            | [196]                             | 6707018                         | <i>H. brasiliensis</i>   | latex protein allergen Hev b 7           |
| <b>P34</b>                 | 0.46: 0.83: 1.33                                       | 5.31/41.9                           | [392]                             | 32186890                        | <i>G. hirsutum</i>       | actin                                    |
| <b>P35</b>                 | 5.06: 6.54: 0.89                                       | 6.5/32.1                            | [141]                             | 255552291                       | <i>R. communis</i>       | short chain dehydrogenase, putative      |
| <b>P36</b>                 | 3.77: 1.01: 0.22                                       | 5.06/19.6                           | [393]                             | 38122474                        | <i>H. brasiliensis</i>   | Rubber elongation factor protein         |
| <b>P37</b>                 | 0.14: 0.21: 1.29                                       | 4.06/15.2                           | [288]                             | 334854634                       | <i>H. brasiliensis</i>   | elicitor-responsive protein              |
| <b>P38</b>                 | 7.23: 7.56: 2.19                                       | 4.8/22.3                            | [353]                             | 14423933                        | <i>H. brasiliensis</i>   | Small rubber particle protein            |
| <b>P39</b>                 | 4.51: 5.10: 1.94                                       | 4.8/22.3                            | [342]                             | 14423933                        | <i>H. brasiliensis</i>   | Small rubber particle protein            |
| <b>P40</b>                 | 2.06: 2.04: 1.51                                       | 4.61/12.8                           | [316]                             | 29170601                        | <i>H. brasiliensis</i>   | Small rubber particle protein            |
| <b>P41</b>                 | 0.88: 9.80: 10.89                                      | 5.64/20.9                           | [261]                             | 2832430                         | <i>H. brasiliensis</i>   | prohevein                                |

|            |                   |           |       |           |                        |                                     |
|------------|-------------------|-----------|-------|-----------|------------------------|-------------------------------------|
| <b>P42</b> | 2.11: 2.06: 1.12  | 4.79/29.5 | 93    | 388503664 | <i>L. japonicus</i>    | unknown                             |
| <b>P43</b> | 2.33: 3.97: 2.19  | 4.76/29.9 | [294] | 326694865 | <i>H. brasiliensis</i> | 14-3-3 protein 2                    |
| <b>P44</b> | 1.55: 3.01: 2.80  | 5.84/27.4 | [69]  | 224099853 | <i>P. trichocarpa</i>  | predicted protein                   |
| <b>P45</b> | 1.35: 2.18: 1.71  | 9.4/41.5  | [745] | 124365253 | <i>H. brasiliensis</i> | beta-1,3-glucanase                  |
| <b>P46</b> | 1.63: 2.23: 1.35  | 6.11/36.1 | [347] | 224102193 | <i>P. trichocarpa</i>  | malate dehydrogenase                |
| <b>P47</b> | 0.67: 0.46: 0.74  | 4.65/41.4 | [75]  | 255578278 | <i>R. communis</i>     | hypothetical protein                |
| <b>P48</b> | 2.41: 6.72: 3.69  | 6.5/32.1  | [201] | 255552291 | <i>R. communis</i>     | short chain dehydrogenase, putative |
| <b>P49</b> | 1.14: 2.77: 2.94  | 5.17/30.1 | [175] | 255581753 | <i>R. communis</i>     | adenosine kinase, putative          |
| <b>P50</b> | 1.39: 1.18: 2.23  | 5.79/66.6 | [96]  | 4588474   | <i>B. napus</i>        | phosphoinositide phospholipase C    |
| <b>P51</b> | 1.43: 5.81: 11.34 | 4.65/41.4 | [95]  | 255578278 | <i>R. communis</i>     | hypothetical protein                |
| <b>P52</b> | 5.02: 7.38: 1.33  | 6.5/32.1  | [67]  | 255552291 | <i>R. communis</i>     | short chain dehydrogenase, putative |
| <b>P53</b> | 1.26: 2.25: 2.17  | 5.08/36.3 | [279] | 224057068 | <i>P. trichocarpa</i>  | predicted protein                   |
| <b>P54</b> | 0.44: 0.43: 0.89  | 5.64/20.9 | [181] | 2832430   | <i>H. brasiliensis</i> | prohevein                           |
| <b>P55</b> | 0.41: 0.46: 0.95  | 5.28/47.1 | [55]  | 224071449 | <i>P. trichocarpa</i>  | phospholipase A                     |
| <b>P56</b> | 0.24: 0.58: 3.23  | 6.56/39.2 | [58]  | 218157    | <i>O. sativa</i>       | cytoplasmic aldolase                |
| <b>P57</b> | 0.40: 0.50: 1.64  | 5.49/42.2 | [120] | 15219412  | <i>A. thaliana</i>     | phosphoglycerate kinase             |
| <b>P58</b> | 5.28: 1.23: 0.22  | 5.33/63.7 | [121] | 356513072 | <i>G. max</i>          | phosphoglucomutase, cytoplasmic     |
| <b>P59</b> | 2.65: 1.03: 0.37  | 5.46/63.7 | [95]  | 255568794 | <i>R. communis</i>     | nucleoredoxin, putative             |

**Note:**

<sup>a</sup>Assigned spot number (P1-P59) of the differentially phosphorylated proteins were indicated in Fig. 5.

<sup>b</sup>The relatively changed ratios (E-3/D-3; E-3/D-0; D-3/D-0) of the phosphorylated protein spots among the D-0, D-3 and E-3 latex proteins from the rubber trees treated by water and ethylene. All the protein spots in the 2-DE gels were analyzed by ImageMaster software.

<sup>c</sup>The theoretical values for the *pI* and mass (kDa) of the identified proteins. The theoretical values were retrieved from the protein database.

<sup>d</sup>Mascot searched scores (M.S.) against NCBIInr for the MS and [MS/MS] searched results.

<sup>e</sup>Database accession (gi) numbers according to NCBIInr.
